# Supplementary material for: In Silico Prediction and Prioritisation of Novel Selective Antimicrobial Drug Targets in Escherichia Coli
Source: Research Square preprint supplement (doi:10.21203/rs.3.rs-131560/v1), 2021-01-04
Supplement: Supplementary file 1 [file 8980279ccb265b4c5b5f8ae6.xlsx]

## Sheet: Over cut-off
	% alignment	% id	bitscore	evalue	gapopen	length	mismatch	pident	prot length	qend	qseqid	qstart	send	sseqid	sstart
0	100	100	648	0	0	319	0	100000	319	319	accA	1	319	MTT21173.1	1
1	100	100	648	0	0	319	0	100000	319	319	accA	1	319	OLR36834.1	1
2	100	100	648	0	0	319	0	100000	319	319	accA	1	319	CDN80572.1	1
19	100	100	311	2.86e-111	0	156	0	100000	156	156	accB	1	156	MTT21275.1	1
20	100	100	311	2.86e-111	0	156	0	100000	156	156	accB	1	156	OLR34706.1	1
21	100	100	311	2.86e-111	0	156	0	100000	156	156	accB	1	156	CDN83992.1	1
42	100	99.777	924	0	0	449	1	99777	449	449	accC	1	462	CDN83993.1	14
43	100	99.777	922	0	0	449	1	99777	449	449	accC	1	449	MTT21274.1	1
44	100	99.777	922	0	0	449	1	99777	449	449	accC	1	449	OLR34705.1	1
45	41.6481	25.668	67.8	2.14e-12	4	187	110	25668	449	322	accC	149	875	MTT18898.1	705
47	41.6481	25.668	67.8	2.14e-12	4	187	110	25668	449	322	accC	149	875	OLR36670.1	705
49	41.6481	25.668	67.8	2.14e-12	4	187	110	25668	449	322	accC	149	875	CDN80402.1	705
66	100	100	622	0	0	304	0	100000	304	304	accD	1	332	CDN82993.1	29
67	100	100	622	0	0	304	0	100000	304	304	accD	1	304	MTT17810.1	1
68	100	100	622	0	0	304	0	100000	304	304	accD	1	304	OLR36188.1	1
81	100	99.841	1236	0	0	630	1	99841	630	630	aceF	1	630	MTT21247.1	1
82	100	99.841	1236	0	0	630	1	99841	630	630	aceF	1	630	OLR36762.1	1
83	100	99.841	1236	0	0	630	1	99841	630	630	aceF	1	630	CDN80498.1	1
84	64.4444	31.281	172	2.98e-48	9	406	249	31281	630	630	aceF	227	403	MTT21454.1	26
87	64.4444	31.281	172	2.98e-48	9	406	249	31281	630	630	aceF	227	403	OLR37572.1	26
90	64.4444	31.281	172	2.98e-48	9	406	249	31281	630	630	aceF	227	403	CDN81095.1	26
93	64.4444	29.557	157	7.65e-43	8	406	233	29557	630	630	aceF	229	382	MTT17941.1	26
96	64.4444	29.557	157	7.65e-43	8	406	233	29557	630	630	aceF	229	382	OLR36474.1	26
99	64.4444	29.557	157	7.65e-43	8	406	233	29557	630	630	aceF	229	382	CDN84907.1	26
111	100	100	154	1.13e-51	0	78	0	100000	78	78	acpP	1	78	MTT18755.1	1
112	100	100	154	1.13e-51	0	78	0	100000	78	78	acpP	1	78	OLR37117.1	1
113	100	100	154	1.13e-51	0	78	0	100000	78	78	acpP	1	78	CDN81551.1	1
121	100	97.619	250	3.32e-88	0	126	3	97619	126	126	acpS	1	126	MTT19438.1	1
122	100	97.619	250	3.32e-88	0	126	3	97619	126	126	acpS	1	126	OLR35489.1	1
123	100	97.619	250	3.32e-88	0	126	3	97619	126	126	acpS	1	126	CDN83206.1	1
130	100	100	434	5.56e-158	0	214	0	100000	214	214	adk	1	234	CDN80864.1	21
131	100	100	432	1.56e-157	0	214	0	100000	214	214	adk	1	214	MTT19053.1	1
132	100	100	432	1.56e-157	0	214	0	100000	214	214	adk	1	214	OLR37793.1	1
147	100	99.429	1796	0	0	876	5	99429	876	876	alaS	1	876	MTT19691.1	1
148	100	99.429	1796	0	0	876	5	99429	876	876	alaS	1	876	OLR34546.1	1
149	100	99.429	1796	0	0	876	5	99429	876	876	alaS	1	876	CDN83296.1	1
159	100	99.827	1194	0	0	577	1	99827	577	577	argS	1	577	MTT20374.1	1
160	100	99.827	1194	0	0	577	1	99827	577	577	argS	1	577	OLR30151.1	1
161	100	99.827	1194	0	0	577	1	99827	577	577	argS	1	577	CDN82383.1	1
180	100	99.728	753	0	0	367	1	99728	367	367	asd	1	387	CDN84172.1	21
181	100	99.728	752	0	0	367	1	99728	367	367	asd	1	367	MTT19324.1	1
182	100	99.728	752	0	0	367	1	99728	367	367	asd	1	367	OLR33622.1	1
198	100	99.785	962	0	0	466	1	99785	466	466	asnS	1	466	MTT18614.1	1
199	100	99.785	962	0	0	466	1	99785	466	466	asnS	1	466	OLR36980.1	1
200	100	99.785	962	0	0	466	1	99785	466	466	asnS	1	466	CDN81403.1	1
201	102.146	22.899	68.9	6.43e-13	21	476	296	22899	466	458	asnS	15	499	MTT18038.1	63
202	102.146	22.899	68.9	6.43e-13	21	476	296	22899	466	458	asnS	15	499	OLR36380.1	63
203	102.146	22.899	68.9	6.97e-13	21	476	296	22899	466	458	asnS	15	508	CDN85012.1	72
204	101.288	21.398	63.9	3.15e-11	18	472	308	21398	466	458	asnS	15	499	MTT19986.1	63
205	101.288	21.398	63.9	3.15e-11	18	472	308	21398	466	458	asnS	15	499	OLR35087.1	63
206	101.288	21.398	63.9	3.15e-11	18	472	308	21398	466	458	asnS	15	499	CDN83510.1	63
207	23.8197	33.333	63.5	4.19e-11	2	111	69	33333	466	466	asnS	360	563	MTT20364.1	454
209	23.8197	33.333	63.5	4.19e-11	2	111	69	33333	466	466	asnS	360	563	OLR30142.1	454
211	23.8197	33.333	63.5	4.19e-11	2	111	69	33333	466	466	asnS	360	563	CDN82373.1	454
222	100	99.322	1210	0	0	590	4	99322	590	590	aspS	1	590	MTT20364.1	1
223	100	99.322	1210	0	0	590	4	99322	590	590	aspS	1	590	OLR30142.1	1
224	100	99.322	1210	0	0	590	4	99322	590	590	aspS	1	590	CDN82373.1	1
225	51.5254	28.289	94.7	6.61e-21	12	304	183	28289	590	298	aspS	11	345	MTT19986.1	61
227	51.5254	28.289	94.7	6.61e-21	12	304	183	28289	590	298	aspS	11	345	OLR35087.1	61
229	51.5254	28.289	94.7	6.61e-21	12	304	183	28289	590	298	aspS	11	345	CDN83510.1	61
231	51.3559	26.403	90.9	1.05e-19	10	303	190	26403	590	298	aspS	11	354	CDN85012.1	70
232	25.0847	27.703	59.7	8.8e-10	3	148	100	27703	590	555	aspS	413	508	CDN85012.1	363
233	51.3559	26.403	90.9	1.17e-19	10	303	190	26403	590	298	aspS	11	345	MTT18038.1	61
234	25.0847	27.703	60.1	7.75e-10	3	148	100	27703	590	555	aspS	413	499	MTT18038.1	354
235	51.3559	26.403	90.9	1.17e-19	10	303	190	26403	590	298	aspS	11	345	OLR36380.1	61
236	25.0847	27.703	60.1	7.75e-10	3	148	100	27703	590	555	aspS	413	499	OLR36380.1	354
237	18.8136	33.333	63.5	5.59e-11	2	111	69	33333	590	563	aspS	454	466	MTT18614.1	360
239	18.8136	33.333	63.5	5.59e-11	2	111	69	33333	590	563	aspS	454	466	OLR36980.1	360
241	18.8136	33.333	63.5	5.59e-11	2	111	69	33333	590	563	aspS	454	466	CDN81403.1	360
256	100	100	1664	0	0	810	0	100000	810	810	bamA	1	810	MTT21181.1	1
257	100	100	1664	0	0	810	0	100000	810	810	bamA	1	810	OLR36826.1	1
258	100	100	1664	0	0	810	0	100000	810	810	bamA	1	810	CDN80564.1	1
268	100	100	507	0	0	245	0	100000	245	245	bamD	1	245	MTT19749.1	1
269	100	100	507	0	0	245	0	100000	245	245	bamD	1	245	OLR31787.1	1
270	100	100	507	0	0	245	0	100000	245	245	bamD	1	245	CDN83235.1	1
288	100	98.442	636	0	0	321	5	98442	321	321	birA	1	321	MTT22326.1	1
289	100	98.442	636	0	0	321	5	98442	321	321	birA	1	321	OLR28407.1	1
290	100	98.442	636	0	0	321	5	98442	321	321	birA	1	321	CDN84816.1	1
297	100	100	457	5.31e-167	0	220	0	100000	220	220	can	1	220	MTT21236.1	1
298	100	100	457	5.31e-167	0	220	0	100000	220	220	can	1	220	OLR36773.1	1
299	100	100	457	5.31e-167	0	220	0	100000	220	220	can	1	220	CDN80509.1	1
306	100	98.786	839	0	0	412	5	98786	412	412	cca	1	412	MTT20307.1	1
307	100	98.786	839	0	0	412	5	98786	412	412	cca	1	412	OLR35673.1	1
308	100	98.786	839	0	0	412	5	98786	412	412	cca	1	412	CDN83807.1	1
309	78.3981	27.864	75.9	2.57e-15	12	323	192	27864	412	299	cca	4	360	OLR36791.1	52
310	78.3981	27.864	75.9	2.84e-15	12	323	192	27864	412	299	cca	4	378	MTT21218.1	70
311	78.3981	27.864	75.9	2.84e-15	12	323	192	27864	412	299	cca	4	378	CDN80527.1	70
321	100	98.947	558	0	0	285	3	98947	285	285	cdsA	1	285	MTT21183.1	1
322	100	98.947	558	0	0	285	3	98947	285	285	cdsA	1	285	OLR36824.1	1
323	100	98.947	558	0	0	285	3	98947	285	285	cdsA	1	285	CDN80562.1	1
332	100	100	652	0	0	316	0	100000	316	316	coaA	1	316	MTT22325.1	1
333	100	100	652	0	0	316	0	100000	316	316	coaA	1	318	OLR28406.1	3
334	100	100	652	0	0	316	0	100000	316	316	coaA	1	323	CDN84817.1	8
354	100	98.113	323	6.42e-116	0	159	3	98113	159	159	coaD	1	159	MTT19870.1	1
355	100	98.113	323	6.42e-116	0	159	3	98113	159	159	coaD	1	159	OLR35854.1	1
356	100	98.113	323	6.42e-116	0	159	3	98113	159	159	coaD	1	159	CDN84392.1	1
385	100	100	418	6.62e-152	0	206	0	100000	206	206	coaE	1	206	MTT18824.1	1
386	100	100	418	6.62e-152	0	206	0	100000	206	206	coaE	1	206	OLR36742.1	1
387	100	100	418	6.62e-152	0	206	0	100000	206	206	coaE	1	206	CDN80479.1	1
428	100	100	122	1.87e-39	0	61	0	100000	61	61	csrA	1	61	MTT19692.1	1
429	100	100	122	1.87e-39	0	61	0	100000	61	61	csrA	1	61	OLR34545.1	1
430	100	100	122	1.87e-39	0	61	0	100000	61	61	csrA	1	61	CDN83295.1	1
446	100	100	1066	0	0	522	0	100000	522	522	cydA	1	522	MTT21447.1	1
447	100	100	1066	0	0	522	0	100000	522	522	cydA	1	522	OLR37566.1	1
448	100	100	1066	0	0	522	0	100000	522	522	cydA	1	523	CDN81104.1	2
449	96.9349	61.858	664	0	0	506	193	61858	522	506	cydA	1	506	MTT18654.1	1
450	96.9349	61.858	664	0	0	506	193	61858	522	506	cydA	1	506	OLR37018.1	1
451	96.9349	61.858	664	0	0	506	193	61858	522	506	cydA	1	506	CDN81444.1	1
464	100	100	765	0	0	379	0	100000	379	379	cydB	1	379	MTT21446.1	1
465	100	100	765	0	0	379	0	100000	379	379	cydB	1	379	OLR37565.1	1
466	100	100	765	0	0	379	0	100000	379	379	cydB	1	379	CDN81105.1	1
467	100	57.52	450	6.12e-159	1	379	160	57520	379	379	cydB	1	378	MTT18655.1	1
468	100	57.52	450	6.12e-159	1	379	160	57520	379	379	cydB	1	378	OLR37019.1	1
469	100	57.52	450	6.12e-159	1	379	160	57520	379	379	cydB	1	378	CDN81445.1	1
476	100	98.953	1132	0	0	573	6	98953	573	573	cydC	1	573	MTT20074.1	1
477	100	98.953	1132	0	0	573	6	98953	573	573	cydC	1	573	OLR37422.1	1
478	100	98.953	1132	0	0	573	6	98953	573	573	cydC	1	573	CDN81252.1	1
479	86.2129	28.543	201	1.41e-57	8	494	330	28543	573	571	cydC	90	577	MTT18598.1	95
480	86.2129	28.543	201	1.41e-57	8	494	330	28543	573	571	cydC	90	577	OLR36964.1	95
481	86.2129	28.543	201	1.41e-57	8	494	330	28543	573	571	cydC	90	577	CDN81387.1	95
482	88.8307	29.47	171	1.65e-46	14	509	310	29470	573	572	cydC	84	579	MTT21686.1	100
483	88.8307	29.47	171	1.65e-46	14	509	310	29470	573	572	cydC	84	579	OLR32759.1	100
484	88.8307	29.47	171	1.65e-46	14	509	310	29470	573	572	cydC	84	579	CDN82598.1	100
485	105.585	27.107	169	5.8e-46	13	605	369	27107	573	571	cydC	4	572	MTT19078.1	3
486	105.585	27.107	169	5.8e-46	13	605	369	27107	573	571	cydC	4	572	OLR37817.1	3
487	105.585	27.107	169	5.8e-46	13	605	369	27107	573	571	cydC	4	572	CDN80838.1	3
488	90.925	29.175	157	6.9e-42	14	521	349	29175	573	571	cydC	62	547	OLR32760.1	36
489	90.925	29.175	157	6.9e-42	14	521	349	29175	573	571	cydC	62	547	CDN82599.1	36
490	90.925	29.175	157	1.23e-41	14	521	349	29175	573	571	cydC	62	577	MTT21685.1	66
491	93.7173	26.629	139	2.08e-35	11	537	364	26629	573	571	cydC	43	573	MTT19077.1	59
492	93.7173	26.629	139	2.08e-35	11	537	364	26629	573	571	cydC	43	573	OLR37816.1	59
493	93.7173	26.629	139	2.08e-35	11	537	364	26629	573	571	cydC	43	573	CDN80839.1	59
494	87.4346	28.343	134	6.26e-34	15	501	317	28343	573	566	cydC	93	577	MTT20073.1	92
495	87.4346	28.343	134	6.26e-34	15	501	317	28343	573	566	cydC	93	577	OLR37421.1	92
496	87.4346	28.343	134	6.26e-34	15	501	317	28343	573	566	cydC	93	577	CDN81253.1	92
497	39.0925	35.268	110	1.38e-27	7	224	119	35268	573	552	cydC	346	232	MTT19369.1	18
498	39.0925	35.268	110	1.38e-27	7	224	119	35268	573	552	cydC	346	232	OLR32855.1	18
499	39.0925	35.268	110	1.38e-27	7	224	119	35268	573	552	cydC	346	232	CDN84219.1	18
500	31.9372	36.066	105	5.33e-26	4	183	105	36066	573	531	cydC	355	201	MTT22225.1	25
501	31.9372	36.066	105	5.33e-26	4	183	105	36066	573	531	cydC	355	201	OLR29021.1	25
502	31.9372	36.066	105	5.33e-26	4	183	105	36066	573	531	cydC	355	201	CDN85442.1	25
503	40.1396	33.043	102	1.03e-24	6	230	144	33043	573	561	cydC	339	227	MTT22255.1	1
504	40.1396	33.043	102	1.03e-24	6	230	144	33043	573	561	cydC	339	227	OLR29160.1	1
505	40.1396	33.043	102	1.03e-24	6	230	144	33043	573	561	cydC	339	227	CDN85185.1	1
506	37.8709	35.484	102	3.16e-24	7	217	128	35484	573	562	cydC	354	231	MTT21158.1	19
507	37.8709	35.484	102	3.16e-24	7	217	128	35484	573	562	cydC	354	231	OLR36849.1	19
508	37.8709	35.484	102	3.16e-24	7	217	128	35484	573	562	cydC	354	231	CDN80591.1	19
509	40.4887	34.914	99.4	7.13e-24	8	232	132	34914	573	569	cydC	353	243	MTT20465.1	16
510	40.4887	34.914	99.4	7.13e-24	8	232	132	34914	573	569	cydC	353	243	OLR34220.1	16
511	40.4887	34.914	99.4	7.13e-24	8	232	132	34914	573	569	cydC	353	243	CDN82478.1	16
512	42.4084	30.453	96.7	8.27e-23	7	243	147	30453	573	565	cydC	338	245	MTT21081.1	10
513	42.4084	30.453	96.7	8.27e-23	7	243	147	30453	573	565	cydC	338	245	OLR35758.1	10
514	42.4084	30.453	96.7	8.27e-23	7	243	147	30453	573	565	cydC	338	245	CDN84558.1	10
515	38.918	32.735	100	1.77e-22	5	223	139	32735	573	553	cydC	339	224	MTT20080.1	5
516	38.918	32.735	100	1.77e-22	5	223	139	32735	573	553	cydC	339	224	OLR37428.1	5
517	38.918	32.735	100	1.77e-22	5	223	139	32735	573	553	cydC	339	224	CDN81246.1	5
518	40.3141	33.766	92.8	9.18e-22	7	231	129	33766	573	550	cydC	335	223	MTT18778.1	2
519	40.3141	33.766	92.8	9.18e-22	7	231	129	33766	573	550	cydC	335	223	OLR37138.1	2
520	40.3141	33.766	92.8	9.18e-22	7	231	129	33766	573	550	cydC	335	223	CDN81575.1	2
521	39.7906	29.825	92.4	2.84e-21	5	228	153	29825	573	560	cydC	338	236	MTT21206.1	11
522	39.7906	29.825	92.4	2.84e-21	5	228	153	29825	573	560	cydC	338	236	OLR36802.1	11
523	39.7906	29.825	92.4	2.84e-21	5	228	153	29825	573	560	cydC	338	236	CDN80540.1	11
524	39.0925	33.482	88.2	5.68e-20	11	224	120	33482	573	561	cydC	354	236	MTT21251.1	26
525	39.0925	33.482	88.2	5.68e-20	11	224	120	33482	573	561	cydC	354	236	OLR34682.1	26
526	39.0925	33.482	88.2	5.68e-20	11	224	120	33482	573	561	cydC	354	236	CDN84016.1	26
527	34.3805	35.025	87	1.29e-19	8	197	101	35025	573	553	cydC	372	217	MTT20723.1	33
528	34.3805	35.025	87	1.29e-19	8	197	101	35025	573	553	cydC	372	217	OLR37642.1	33
529	34.3805	35.025	87	1.29e-19	8	197	101	35025	573	553	cydC	372	217	CDN81023.1	33
530	36.8237	35.545	86.3	1.7e-19	5	211	114	35545	573	553	cydC	356	227	MTT19029.1	26
531	36.8237	35.545	86.3	1.7e-19	5	211	114	35545	573	553	cydC	356	227	OLR37770.1	26
532	36.8237	35.545	86.3	1.7e-19	5	211	114	35545	573	553	cydC	356	227	CDN80889.1	26
533	37.6963	32.87	86.3	2.46e-19	7	216	126	32870	573	554	cydC	352	223	MTT20095.1	14
534	37.6963	32.87	86.3	2.46e-19	7	216	126	32870	573	554	cydC	352	223	OLR37442.1	14
535	37.6963	32.87	86.7	2.89e-19	7	216	126	32870	573	554	cydC	352	256	CDN81230.1	47
536	39.7906	31.14	87	3.69e-19	5	228	151	31140	573	562	cydC	337	226	MTT21235.1	3
537	39.7906	31.14	87	3.69e-19	5	228	151	31140	573	562	cydC	337	226	OLR36774.1	3
538	39.7906	31.14	87	3.69e-19	5	228	151	31140	573	562	cydC	337	226	CDN80510.1	3
539	63.8743	26.776	88.6	7.22e-19	13	366	219	26776	573	552	cydC	207	529	MTT17710.1	193
540	63.8743	26.776	88.6	7.22e-19	13	366	219	26776	573	552	cydC	207	529	OLR36088.1	193
541	63.8743	26.776	88.6	7.22e-19	13	366	219	26776	573	552	cydC	207	529	CDN82889.1	193
542	33.8569	35.567	83.6	1.21e-18	6	194	111	35567	573	538	cydC	353	202	MTT19352.1	15
543	33.8569	35.567	83.6	1.21e-18	6	194	111	35567	573	538	cydC	353	202	OLR32872.1	15
544	33.8569	35.567	83.6	1.21e-18	6	194	111	35567	573	538	cydC	353	202	CDN84202.1	15
545	40.6632	28.326	84.3	1.28e-18	6	233	144	28326	573	564	cydC	346	230	MTT19402.1	7
546	40.6632	28.326	84.3	1.28e-18	6	233	144	28326	573	564	cydC	346	230	OLR32822.1	7
547	36.4747	30.144	84	1.51e-18	6	209	133	30144	573	554	cydC	354	218	MTT20150.1	15
548	36.4747	30.144	84	1.51e-18	6	209	133	30144	573	554	cydC	354	218	OLR37496.1	15
549	36.4747	30.144	84	1.51e-18	6	209	133	30144	573	554	cydC	354	218	CDN81176.1	15
550	40.1396	29.13	85.5	1.85e-18	6	230	149	29130	573	567	cydC	349	257	MTT19778.1	31
551	40.1396	29.13	85.5	1.85e-18	6	230	149	29130	573	567	cydC	349	257	OLR35948.1	31
552	40.1396	29.13	85.5	1.85e-18	6	230	149	29130	573	567	cydC	349	257	CDN84296.1	31
553	39.7906	28.509	83.6	2.12e-18	6	228	142	28509	573	554	cydC	339	223	MTT19368.1	5
554	39.7906	28.509	83.6	2.12e-18	6	228	142	28509	573	554	cydC	339	223	OLR32856.1	5
555	39.7906	28.509	83.6	2.12e-18	6	228	142	28509	573	554	cydC	339	223	CDN84218.1	5
556	40.6632	28.326	83.6	3.23e-18	6	233	144	28326	573	564	cydC	346	240	CDN84257.1	17
557	36.1257	31.401	82.8	3.44e-18	6	207	131	31401	573	561	cydC	360	226	CDN80442.1	26
558	34.2059	30.612	82.4	3.64e-18	4	196	122	30612	573	545	cydC	356	210	MTT19034.1	23
559	34.2059	30.612	82.4	3.64e-18	4	196	122	30612	573	545	cydC	356	210	OLR37773.1	23
560	34.2059	30.612	82.4	3.64e-18	4	196	122	30612	573	545	cydC	356	210	CDN80884.1	23
561	36.1257	31.401	82.4	3.98e-18	6	207	131	31401	573	561	cydC	360	219	MTT18860.1	19
562	36.1257	31.401	82.4	3.98e-18	6	207	131	31401	573	561	cydC	360	219	OLR36707.1	19
563	39.0925	31.696	82	8.02e-18	6	224	131	31696	573	550	cydC	332	211	MTT18617.1	5
564	39.0925	31.696	82	8.02e-18	6	224	131	31696	573	550	cydC	332	211	OLR36983.1	5
565	39.0925	31.696	82	8.02e-18	6	224	131	31696	573	550	cydC	332	211	CDN81406.1	5
566	37.6963	30.556	83.6	1.05e-17	6	216	132	30556	573	560	cydC	353	219	OLR29449.1	14
567	37.6963	30.093	82.4	2.11e-17	6	216	133	30093	573	560	cydC	353	219	MTT22121.1	14
568	39.9651	30.131	83.6	2.66e-17	7	229	134	30131	573	567	cydC	356	521	MTT17682.1	302
569	43.4555	29.317	75.9	7.16e-15	8	249	148	29317	573	570	cydC	344	255	MTT17682.1	13
570	39.9651	30.131	83.6	2.66e-17	7	229	134	30131	573	567	cydC	356	521	OLR36057.1	302
571	43.4555	29.317	75.9	7.16e-15	8	249	148	29317	573	570	cydC	344	255	OLR36057.1	13
572	39.9651	30.131	83.6	2.66e-17	7	229	134	30131	573	567	cydC	356	521	CDN82859.1	302
573	43.4555	29.317	75.9	7.16e-15	8	249	148	29317	573	570	cydC	344	255	CDN82859.1	13
574	39.4415	28.761	80.9	2.83e-17	4	226	154	28761	573	560	cydC	341	232	MTT20664.1	8
575	39.4415	28.761	80.9	2.83e-17	4	226	154	28761	573	560	cydC	341	232	OLR37701.1	8
576	39.4415	28.761	80.9	2.83e-17	4	226	154	28761	573	560	cydC	341	232	CDN80961.1	8
577	39.4415	29.646	82.4	3.63e-17	8	226	136	29646	573	567	cydC	356	260	MTT19707.1	44
578	39.4415	29.646	82.4	3.63e-17	8	226	136	29646	573	567	cydC	356	260	OLR31826.1	44
579	39.4415	29.646	82.4	3.63e-17	8	226	136	29646	573	567	cydC	356	260	CDN83277.1	44
580	38.5689	30.317	79.7	3.81e-17	7	221	132	30317	573	563	cydC	354	224	OLR32900.1	15
581	46.5969	29.588	82	4.32e-17	10	267	170	29588	573	559	cydC	299	264	CDN81221.1	10
582	41.8848	29.583	79.3	4.42e-17	8	240	145	29583	573	563	cydC	335	228	MTT19341.1	2
583	41.8848	29.583	79.3	5.17e-17	8	240	145	29583	573	563	cydC	335	232	CDN84190.1	6
584	39.7906	28.509	79.7	6.58e-17	8	228	140	28509	573	561	cydC	348	240	MTT20890.1	22
585	39.7906	28.509	79.7	6.58e-17	8	228	140	28509	573	561	cydC	348	240	OLR35219.1	22
586	39.7906	28.509	79.7	6.58e-17	8	228	140	28509	573	561	cydC	348	240	CDN81909.1	22
587	50.6108	28.276	82.8	8.6e-17	10	290	186	28276	573	564	cydC	287	498	CDN84230.1	219
588	37.6963	27.315	70.9	3.97e-13	7	216	139	27315	573	559	cydC	355	234	CDN84230.1	26
589	50.6108	28.276	82.4	8.75e-17	10	290	186	28276	573	564	cydC	287	499	MTT19379.1	220
590	37.6963	27.315	70.9	4.01e-13	7	216	139	27315	573	559	cydC	355	235	MTT19379.1	27
591	50.6108	28.276	82.4	8.75e-17	10	290	186	28276	573	564	cydC	287	499	OLR32845.1	220
592	37.6963	27.315	70.9	4.01e-13	7	216	139	27315	573	559	cydC	355	235	OLR32845.1	27
593	44.6771	26.563	80.1	1.13e-16	10	256	142	26563	573	559	cydC	333	252	MTT22072.1	14
594	44.6771	26.563	80.1	1.13e-16	10	256	142	26563	573	559	cydC	333	252	OLR37336.1	14
595	44.6771	26.563	80.1	1.13e-16	10	256	142	26563	573	559	cydC	333	252	CDN81792.1	14
596	41.7103	30.544	80.1	1.4e-16	9	239	151	30544	573	559	cydC	327	237	MTT20104.1	8
597	41.7103	30.544	80.1	1.4e-16	9	239	151	30544	573	559	cydC	327	237	OLR37451.1	8
598	38.2199	29.224	77.8	2.37e-16	7	219	129	29224	573	557	cydC	356	234	MTT20277.1	25
599	38.2199	29.224	77.8	2.37e-16	7	219	129	29224	573	557	cydC	356	234	OLR35643.1	25
600	38.2199	29.224	77.8	2.37e-16	7	219	129	29224	573	557	cydC	356	234	CDN83777.1	25
601	36.8237	29.384	77	3.41e-16	5	211	138	29384	573	554	cydC	354	228	MTT17999.1	19
602	36.8237	29.384	77	3.41e-16	5	211	138	29384	573	554	cydC	354	228	OLR36417.1	19
603	36.8237	29.384	77	5.09e-16	5	211	138	29384	573	554	cydC	354	238	CDN84968.1	29
604	39.267	26.667	76.6	1.01e-15	6	225	144	26667	573	555	cydC	344	218	MTT17631.1	2
605	39.267	26.667	76.6	1.01e-15	6	225	144	26667	573	555	cydC	344	218	OLR36006.1	2
606	39.267	26.667	76.6	1.01e-15	6	225	144	26667	573	555	cydC	344	218	CDN82807.1	2
607	38.918	30.493	75.1	1.74e-15	10	223	125	30493	573	555	cydC	339	203	MTT18182.1	5
608	38.918	30.493	75.1	1.74e-15	10	223	125	30493	573	555	cydC	339	203	OLR35010.1	5
609	38.918	30.493	75.1	1.74e-15	10	223	125	30493	573	555	cydC	339	203	CDN82362.1	5
610	45.5497	29.885	75.1	1.75e-15	9	261	146	29885	573	572	cydC	338	254	MTT17800.1	5
611	45.5497	29.885	75.1	1.75e-15	9	261	146	29885	573	572	cydC	338	254	OLR36178.1	5
612	45.5497	29.885	75.1	1.75e-15	9	261	146	29885	573	572	cydC	338	254	CDN82983.1	5
613	36.9983	30.189	76.6	1.85e-15	7	212	129	30189	573	559	cydC	357	221	MTT17916.1	20
614	36.9983	30.189	76.6	1.85e-15	7	212	129	30189	573	559	cydC	357	221	OLR36498.1	20
615	40.1396	27.826	76.3	2.27e-15	9	230	133	27826	573	553	cydC	339	215	MTT20911.1	4
616	40.1396	27.826	76.3	2.27e-15	9	230	133	27826	573	553	cydC	339	215	OLR35239.1	4
617	40.1396	27.826	76.3	2.27e-15	9	230	133	27826	573	553	cydC	339	215	CDN81930.1	4
618	34.555	31.313	74.7	2.6e-15	5	198	129	31313	573	532	cydC	339	198	MTT20797.1	4
619	34.555	31.313	74.7	2.6e-15	5	198	129	31313	573	532	cydC	339	198	OLR37257.1	4
620	34.555	31.313	74.7	2.6e-15	5	198	129	31313	573	532	cydC	339	198	CDN81699.1	4
621	39.7906	30.263	74.3	2.63e-15	7	228	149	30263	573	560	cydC	338	225	MTT21319.1	3
622	39.7906	30.263	74.3	2.63e-15	7	228	149	30263	573	560	cydC	338	225	OLR34748.1	3
623	39.7906	30.263	74.3	2.63e-15	7	228	149	30263	573	560	cydC	338	225	CDN83945.1	3
624	36.9983	30.189	75.9	4e-15	7	212	129	30189	573	559	cydC	357	251	CDN84880.1	50
625	40.1396	27.826	73.9	6.19e-15	7	230	139	27826	573	554	cydC	339	223	MTT20840.1	7
626	40.1396	27.826	73.9	6.19e-15	7	230	139	27826	573	554	cydC	339	223	OLR37213.1	7
627	40.1396	27.826	73.6	6.89e-15	7	230	139	27826	573	554	cydC	339	222	CDN81652.1	6
628	37.1728	30.516	72.4	8.82e-15	6	213	134	30516	573	545	cydC	339	206	MTT18283.1	2
629	37.1728	30.516	72.4	8.82e-15	6	213	134	30516	573	545	cydC	339	206	OLR34908.1	2
630	38.918	30.493	72.4	8.94e-15	7	223	139	30493	573	545	cydC	329	217	CDN82260.1	5
631	39.4415	27.876	74.7	1.71e-14	7	226	149	27876	573	556	cydC	339	227	MTT20393.1	8
633	39.4415	27.876	74.7	1.71e-14	7	226	149	27876	573	556	cydC	339	227	OLR34149.1	8
635	39.4415	27.876	73.9	2.59e-14	7	226	149	27876	573	556	cydC	339	242	CDN82403.1	23
637	32.9843	32.275	71.2	3.55e-14	6	189	103	32275	573	533	cydC	355	189	MTT19155.1	16
638	32.9843	32.275	71.2	3.55e-14	6	189	103	32275	573	533	cydC	355	189	OLR37895.1	16
639	32.9843	32.275	71.2	3.55e-14	6	189	103	32275	573	533	cydC	355	189	CDN80756.1	16
640	39.0925	28.571	71.2	3.58e-14	7	224	139	28571	573	559	cydC	355	241	MTT19342.1	20
641	39.0925	28.571	71.2	3.58e-14	7	224	139	28571	573	559	cydC	355	241	OLR32881.1	20
642	39.0925	28.571	71.2	3.58e-14	7	224	139	28571	573	559	cydC	355	241	CDN84191.1	20
643	37.6963	30.093	72.8	4.09e-14	9	216	136	30093	573	562	cydC	354	238	CDN84185.1	31
644	37.6963	30.093	72.4	4.19e-14	9	216	136	30093	573	562	cydC	354	225	MTT19337.1	18
645	37.6963	30.093	72.4	4.19e-14	9	216	136	30093	573	562	cydC	354	225	OLR32886.1	18
646	37.8709	29.493	72.4	4.92e-14	7	217	132	29493	573	559	cydC	353	235	MTT18787.1	30
647	37.8709	29.493	72.4	4.92e-14	7	217	132	29493	573	559	cydC	353	235	OLR37147.1	30
648	37.8709	29.493	72.4	4.92e-14	7	217	132	29493	573	559	cydC	353	235	CDN81584.1	30
649	39.9651	26.201	72.8	6.93e-14	6	229	160	26201	573	554	cydC	329	224	CDN81160.1	2
650	38.0454	27.523	62.4	1.39e-10	5	218	148	27523	573	568	cydC	355	560	CDN81160.1	349
651	38.2199	26.027	72.8	8.11e-14	5	219	154	26027	573	554	cydC	339	219	MTT20164.1	6
652	38.0454	27.523	62.4	1.5e-10	5	218	148	27523	573	568	cydC	355	555	MTT20164.1	344
653	38.2199	26.027	72.8	8.11e-14	5	219	154	26027	573	554	cydC	339	219	OLR37510.1	6
654	38.0454	27.523	62.4	1.5e-10	5	218	148	27523	573	568	cydC	355	555	OLR37510.1	344
655	31.4136	30.556	68.6	1.9e-13	5	180	100	30556	573	519	cydC	356	194	MTT17998.1	24
656	31.4136	30.556	68.6	1.9e-13	5	180	100	30556	573	519	cydC	356	194	OLR36418.1	24
657	31.4136	30.556	68.6	1.9e-13	5	180	100	30556	573	519	cydC	356	194	CDN84967.1	24
658	35.7766	35.122	67.8	3.86e-13	10	205	110	35122	573	531	cydC	339	197	MTT17975.1	4
659	35.7766	35.122	67.8	3.86e-13	10	205	110	35122	573	531	cydC	339	197	OLR36441.1	4
660	35.7766	35.122	67.8	3.86e-13	10	205	110	35122	573	531	cydC	339	197	CDN84943.1	4
661	39.4415	27.434	69.3	9.24e-13	8	226	148	27434	573	553	cydC	337	234	MTT20651.1	16
663	39.4415	27.434	69.3	9.24e-13	8	226	148	27434	573	553	cydC	337	234	OLR37714.1	16
665	39.4415	27.434	69.3	9.24e-13	8	226	148	27434	573	553	cydC	337	234	CDN80947.1	16
667	38.0454	29.358	69.3	1.07e-12	6	218	128	29358	573	554	cydC	354	546	MTT20130.1	338
668	41.5358	25.63	61.2	3.45e-10	7	238	148	25630	573	555	cydC	343	252	MTT20130.1	19
669	38.0454	29.358	69.3	1.07e-12	6	218	128	29358	573	554	cydC	354	546	OLR37476.1	338
670	41.5358	25.63	61.2	3.45e-10	7	238	148	25630	573	555	cydC	343	252	OLR37476.1	19
671	38.0454	29.358	69.3	1.07e-12	6	218	128	29358	573	554	cydC	354	546	CDN81195.1	338
672	41.5358	25.63	61.2	3.45e-10	7	238	148	25630	573	555	cydC	343	252	CDN81195.1	19
673	41.1867	29.661	67.8	1.36e-12	7	236	144	29661	573	555	cydC	339	252	MTT22073.1	20
674	41.1867	29.661	67.8	1.36e-12	7	236	144	29661	573	555	cydC	339	252	OLR37335.1	20
675	41.1867	29.661	67.8	1.36e-12	7	236	144	29661	573	555	cydC	339	252	CDN81791.1	20
676	37.8709	30.876	67.8	1.64e-12	7	217	138	30876	573	563	cydC	354	227	MTT19556.1	16
677	37.8709	30.876	67.8	1.64e-12	7	217	138	30876	573	563	cydC	354	227	OLR35375.1	16
678	37.8709	30.876	67.8	1.64e-12	7	217	138	30876	573	563	cydC	354	227	CDN83086.1	16
679	36.1257	31.884	67	4.53e-12	8	207	127	31884	573	551	cydC	354	224	MTT18141.1	23
681	36.1257	31.884	67	4.53e-12	8	207	127	31884	573	551	cydC	354	224	OLR36280.1	23
683	36.1257	31.884	67	4.53e-12	8	207	127	31884	573	551	cydC	354	224	CDN85114.1	23
685	37.1728	28.169	65.9	5.47e-12	5	213	144	28169	573	562	cydC	354	225	MTT21550.1	18
686	37.1728	28.169	65.9	5.47e-12	5	213	144	28169	573	562	cydC	354	225	OLR35306.1	18
687	37.1728	28.169	65.9	5.47e-12	5	213	144	28169	573	562	cydC	354	225	CDN81999.1	18
688	36.1257	27.053	63.2	1.14e-11	5	207	129	27053	573	551	cydC	349	202	OLR35555.1	14
689	36.4747	27.751	65.5	1.36e-11	5	209	143	27751	573	554	cydC	354	227	MTT17989.1	19
691	36.4747	27.751	65.5	1.36e-11	5	209	143	27751	573	554	cydC	354	227	OLR36426.1	19
693	36.4747	27.751	65.5	1.36e-11	5	209	143	27751	573	554	cydC	354	227	CDN84958.1	19
695	40.1396	27.826	65.5	1.4e-11	4	230	148	27826	573	560	cydC	340	227	CDN81126.1	7
697	40.1396	27.826	65.1	1.68e-11	4	230	148	27826	573	560	cydC	340	223	MTT20198.1	3
699	40.1396	27.826	65.1	1.68e-11	4	230	148	27826	573	560	cydC	340	223	OLR37545.1	3
701	38.5689	30.769	64.3	3.1e-11	11	221	123	30769	573	558	cydC	354	225	MTT21270.1	19
703	38.5689	30.769	64.3	3.1e-11	11	221	123	30769	573	558	cydC	354	225	OLR34701.1	19
705	38.5689	30.769	64.3	3.1e-11	11	221	123	30769	573	558	cydC	354	225	CDN83997.1	19
707	42.4084	30.041	61.6	6.87e-11	7	243	158	30041	573	573	cydC	339	247	MTT21325.1	9
708	42.4084	30.041	61.6	6.87e-11	7	243	158	30041	573	573	cydC	339	247	OLR34754.1	9
709	42.4084	30.041	61.6	6.87e-11	7	243	158	30041	573	573	cydC	339	247	CDN83939.1	9
710	39.6161	27.313	60.5	1.11e-10	7	227	150	27313	573	550	cydC	332	225	CDN83549.1	6
711	39.7906	25.439	60.5	1.5e-10	7	228	137	25439	573	555	cydC	353	236	MTT18007.1	17
712	39.7906	25.439	60.5	1.5e-10	7	228	137	25439	573	555	cydC	353	236	OLR36409.1	17
713	39.7906	25.439	60.5	1.5e-10	7	228	137	25439	573	555	cydC	353	236	CDN84976.1	17
714	38.3944	27.273	59.7	1.76e-10	7	220	145	27273	573	550	cydC	339	214	MTT19947.1	2
715	38.3944	27.273	59.7	1.76e-10	7	220	145	27273	573	550	cydC	339	214	OLR35121.1	2
716	38.3944	26.818	60.8	3.54e-10	7	220	151	26818	573	551	cydC	339	221	MTT19804.1	5
718	38.3944	26.818	60.8	3.54e-10	7	220	151	26818	573	551	cydC	339	221	OLR35920.1	5
720	38.3944	26.818	60.8	3.54e-10	7	220	151	26818	573	551	cydC	339	221	CDN84323.1	5
722	34.3805	26.396	58.9	3.63e-10	4	197	124	26396	573	542	cydC	349	192	MTT21950.1	14
723	34.904	25.5	58.5	4.94e-10	4	200	128	25500	573	545	cydC	349	195	CDN83688.1	14
835	100	99.32	1171	0	0	588	4	99320	588	588	cydD	1	588	MTT20073.1	1
836	100	99.32	1171	0	0	588	4	99320	588	588	cydD	1	588	OLR37421.1	1
837	100	99.32	1171	0	0	588	4	99320	588	588	cydD	1	588	CDN81253.1	1
838	89.6259	28.273	176	2.48e-48	9	527	350	28273	588	586	cydD	69	551	OLR32760.1	44
839	89.6259	28.273	176	2.48e-48	9	527	350	28273	588	586	cydD	69	551	CDN82599.1	44
840	89.6259	28.843	176	2.89e-48	10	527	347	28843	588	586	cydD	69	581	MTT21685.1	74
841	73.4694	26.852	164	2.42e-44	9	432	295	26852	588	580	cydD	156	575	MTT18598.1	158
842	73.4694	26.852	164	2.42e-44	9	432	295	26852	588	580	cydD	156	575	OLR36964.1	158
843	73.4694	26.852	164	2.42e-44	9	432	295	26852	588	580	cydD	156	575	CDN81387.1	158
844	85.3741	27.291	155	3.52e-41	7	502	341	27291	588	577	cydD	87	568	MTT19077.1	80
845	85.3741	27.291	155	3.52e-41	7	502	341	27291	588	577	cydD	87	568	OLR37816.1	80
846	85.3741	27.291	155	3.52e-41	7	502	341	27291	588	577	cydD	87	568	CDN80839.1	80
847	84.1837	28.283	151	1.63e-39	14	495	314	28283	588	580	cydD	98	576	MTT21686.1	111
848	84.1837	28.283	151	1.63e-39	14	495	314	28283	588	580	cydD	98	576	OLR32759.1	111
849	84.1837	28.283	151	1.63e-39	14	495	314	28283	588	580	cydD	98	576	CDN82598.1	111
850	84.6939	27.912	141	4.18e-36	15	498	323	27912	588	577	cydD	92	566	MTT20074.1	93
851	84.6939	27.912	141	4.18e-36	15	498	323	27912	588	577	cydD	92	566	OLR37422.1	93
852	84.6939	27.912	141	4.18e-36	15	498	323	27912	588	577	cydD	92	566	CDN81252.1	93
853	37.415	34.545	129	6.32e-32	1	220	143	34545	588	587	cydD	369	574	MTT19078.1	355
854	37.415	34.545	129	6.32e-32	1	220	143	34545	588	587	cydD	369	574	OLR37817.1	355
855	37.415	34.545	129	6.32e-32	1	220	143	34545	588	587	cydD	369	574	CDN80838.1	355
856	36.3946	32.243	82.8	3.75e-18	7	214	123	32243	588	570	cydD	368	224	CDN80442.1	22
857	36.3946	32.243	82.4	4.62e-18	7	214	123	32243	588	570	cydD	368	217	MTT18860.1	15
858	36.3946	32.243	82.4	4.62e-18	7	214	123	32243	588	570	cydD	368	217	OLR36707.1	15
859	32.9932	30.928	79.7	3.3e-17	5	194	121	30928	588	557	cydD	369	211	MTT19034.1	26
860	32.9932	30.928	79.7	3.3e-17	5	194	121	30928	588	557	cydD	369	211	OLR37773.1	26
861	32.9932	30.928	79.7	3.3e-17	5	194	121	30928	588	557	cydD	369	211	CDN80884.1	26
862	34.5238	30.542	74.3	2.5e-15	8	203	122	30542	588	562	cydD	369	221	MTT22225.1	29
863	34.5238	30.542	74.3	2.5e-15	8	203	122	30542	588	562	cydD	369	221	OLR29021.1	29
864	34.5238	30.542	74.3	2.5e-15	8	203	122	30542	588	562	cydD	369	221	CDN85442.1	29
865	42.0068	27.935	77	3.17e-15	9	247	162	27935	588	572	cydD	332	242	MTT20651.1	6
867	42.0068	27.935	77	3.17e-15	9	247	162	27935	588	572	cydD	332	242	OLR37714.1	6
869	42.0068	27.935	77	3.17e-15	9	247	162	27935	588	572	cydD	332	242	CDN80947.1	6
871	35.5442	31.1	75.1	5.52e-15	6	209	125	31100	588	570	cydD	373	228	MTT21158.1	28
872	35.5442	31.1	75.1	5.52e-15	6	209	125	31100	588	570	cydD	373	228	OLR36849.1	28
873	35.5442	31.1	75.1	5.52e-15	6	209	125	31100	588	570	cydD	373	228	CDN80591.1	28
874	36.0544	31.604	75.1	5.83e-15	8	212	129	31604	588	565	cydD	361	214	MTT22121.1	12
875	38.2653	30.222	73.6	6.43e-15	11	225	123	30222	588	565	cydD	362	226	MTT20465.1	15
876	38.2653	30.222	73.6	6.43e-15	11	225	123	30222	588	565	cydD	362	226	OLR34220.1	15
877	38.2653	30.222	73.6	6.43e-15	11	225	123	30222	588	565	cydD	362	226	CDN82478.1	15
878	36.0544	30.66	73.6	6.45e-15	9	212	119	30660	588	565	cydD	369	229	MTT21251.1	31
879	36.0544	30.66	73.6	6.45e-15	9	212	119	30660	588	565	cydD	369	229	OLR34682.1	31
880	36.0544	30.66	73.6	6.45e-15	9	212	119	30660	588	565	cydD	369	229	CDN84016.1	31
881	34.6939	30.882	75.9	9.32e-15	7	204	123	30882	588	562	cydD	369	222	MTT20080.1	27
882	34.6939	30.882	75.9	9.32e-15	7	204	123	30882	588	562	cydD	369	222	OLR37428.1	27
883	34.6939	30.882	75.9	9.32e-15	7	204	123	30882	588	562	cydD	369	222	CDN81246.1	27
884	37.0748	32.11	71.6	2.01e-14	8	218	122	32110	588	574	cydD	369	231	MTT18778.1	28
885	37.0748	32.11	71.6	2.01e-14	8	218	122	32110	588	574	cydD	369	231	OLR37138.1	28
886	37.0748	32.11	71.6	2.01e-14	8	218	122	32110	588	574	cydD	369	231	CDN81575.1	28
887	36.9048	33.18	71.2	4.31e-14	9	217	114	33180	588	564	cydD	362	212	MTT19155.1	13
888	36.9048	33.18	71.2	4.31e-14	9	217	114	33180	588	564	cydD	362	212	OLR37895.1	13
889	36.9048	33.18	71.2	4.31e-14	9	217	114	33180	588	564	cydD	362	212	CDN80756.1	13
890	36.0544	31.132	72.4	4.78e-14	8	212	130	31132	588	565	cydD	361	214	OLR29449.1	12
891	36.5646	32.093	71.2	1.41e-13	7	215	134	32093	588	570	cydD	361	235	MTT18787.1	28
892	36.5646	32.093	71.2	1.41e-13	7	215	134	32093	588	570	cydD	361	235	OLR37147.1	28
893	36.5646	32.093	71.2	1.41e-13	7	215	134	32093	588	570	cydD	361	235	CDN81584.1	28
894	36.0544	31.604	68.9	1.92e-13	8	212	121	31604	588	565	cydD	369	223	MTT20095.1	21
895	36.0544	31.604	68.9	1.92e-13	8	212	121	31604	588	565	cydD	369	223	OLR37442.1	21
896	36.0544	31.604	69.3	2.16e-13	8	212	121	31604	588	565	cydD	369	256	CDN81230.1	54
897	38.9456	27.074	68.2	5.11e-13	7	229	142	27074	588	565	cydD	350	223	MTT20840.1	7
898	38.9456	27.074	68.2	5.11e-13	7	229	142	27074	588	565	cydD	350	223	OLR37213.1	7
899	35.034	31.553	67.8	5.22e-13	6	206	104	31553	588	561	cydD	369	211	MTT18617.1	30
900	35.034	31.553	67.8	5.22e-13	6	206	104	31553	588	561	cydD	369	211	OLR36983.1	30
901	35.034	31.553	67.8	5.22e-13	6	206	104	31553	588	561	cydD	369	211	CDN81406.1	30
902	38.9456	27.074	68.2	5.38e-13	7	229	142	27074	588	565	cydD	350	222	CDN81652.1	6
903	34.0136	32	68.6	6.67e-13	7	200	120	32000	588	561	cydD	369	213	MTT21550.1	23
904	34.0136	32	68.6	6.67e-13	7	200	120	32000	588	561	cydD	369	213	OLR35306.1	23
905	34.0136	32	68.6	6.67e-13	7	200	120	32000	588	561	cydD	369	213	CDN81999.1	23
906	38.2653	30.667	68.6	7.86e-13	7	225	136	30667	588	565	cydD	358	251	MTT22073.1	30
907	38.2653	30.667	68.6	7.86e-13	7	225	136	30667	588	565	cydD	358	251	OLR37335.1	30
908	38.2653	30.667	68.6	7.86e-13	7	225	136	30667	588	565	cydD	358	251	CDN81791.1	30
909	38.4354	31.416	69.3	8.1e-13	9	226	120	31416	588	573	cydD	369	516	MTT17682.1	305
910	39.6259	28.326	62	1.92e-10	9	233	132	28326	588	570	cydD	363	244	MTT17682.1	22
911	38.4354	31.416	69.3	8.1e-13	9	226	120	31416	588	573	cydD	369	516	OLR36057.1	305
912	39.6259	28.326	62	1.92e-10	9	233	132	28326	588	570	cydD	363	244	OLR36057.1	22
913	38.4354	31.416	69.3	8.1e-13	9	226	120	31416	588	573	cydD	369	516	CDN82859.1	305
914	39.6259	28.326	62	1.92e-10	9	233	132	28326	588	570	cydD	363	244	CDN82859.1	22
915	42.1769	29.839	68.2	1.18e-12	10	248	146	29839	588	587	cydD	359	266	MTT20104.1	28
916	42.1769	29.839	68.2	1.18e-12	10	248	146	29839	588	587	cydD	359	266	OLR37451.1	28
917	36.5646	27.442	66.2	1.92e-12	7	215	130	27442	588	562	cydD	363	225	MTT20277.1	22
918	36.5646	27.442	66.2	1.92e-12	7	215	130	27442	588	562	cydD	363	225	OLR35643.1	22
919	36.5646	27.442	66.2	1.92e-12	7	215	130	27442	588	562	cydD	363	225	CDN83777.1	22
920	42.6871	29.482	67.8	2.05e-12	10	251	149	29482	588	587	cydD	356	293	CDN81221.1	52
921	35.7143	29.048	68.2	2.16e-12	8	210	133	29048	588	572	cydD	369	229	MTT22156.1	30
923	34.1837	32.836	67.4	2.32e-12	9	201	121	32836	588	561	cydD	369	215	MTT19556.1	21
924	34.1837	32.836	67.4	2.32e-12	9	201	121	32836	588	561	cydD	369	215	OLR35375.1	21
925	34.1837	32.836	67.4	2.32e-12	9	201	121	32836	588	561	cydD	369	215	CDN83086.1	21
926	36.9048	29.954	65.9	2.68e-12	7	217	140	29954	588	570	cydD	362	235	MTT21206.1	23
927	36.9048	29.954	65.9	2.68e-12	7	217	140	29954	588	570	cydD	362	235	OLR36802.1	23
928	36.9048	29.954	65.9	2.68e-12	7	217	140	29954	588	570	cydD	362	235	CDN80540.1	23
929	32.483	30.89	65.1	4.28e-12	8	191	116	30890	588	563	cydD	382	216	MTT20723.1	33
930	32.483	30.89	65.1	4.28e-12	8	191	116	30890	588	563	cydD	382	216	OLR37642.1	33
931	32.483	30.89	65.1	4.28e-12	8	191	116	30890	588	563	cydD	382	216	CDN81023.1	33
932	36.7347	31.019	67	4.58e-12	9	216	129	31019	588	563	cydD	362	223	MTT20393.1	14
934	36.7347	31.019	67	4.58e-12	9	216	129	31019	588	563	cydD	362	223	OLR34149.1	14
936	36.7347	31.019	67	5.29e-12	9	216	129	31019	588	563	cydD	362	238	CDN82403.1	29
938	32.483	31.414	64.3	5.63e-12	9	191	104	31414	588	545	cydD	369	198	MTT19352.1	21
939	32.483	31.414	64.3	5.63e-12	9	191	104	31414	588	545	cydD	369	198	OLR32872.1	21
940	32.483	31.414	64.3	5.63e-12	9	191	104	31414	588	545	cydD	369	198	CDN84202.1	21
941	35.2041	29.952	65.1	6.82e-12	9	207	126	29952	588	565	cydD	369	217	MTT17631.1	20
942	35.2041	29.952	65.1	6.82e-12	9	207	126	29952	588	565	cydD	369	217	OLR36006.1	20
943	35.2041	29.952	65.1	6.82e-12	9	207	126	29952	588	565	cydD	369	217	CDN82807.1	20
944	37.0748	29.817	64.3	7.97e-12	7	218	131	29817	588	570	cydD	364	220	MTT18328.1	14
945	37.0748	29.817	64.3	7.97e-12	7	218	131	29817	588	570	cydD	364	220	OLR34862.1	14
946	37.0748	29.817	64.3	7.97e-12	7	218	131	29817	588	570	cydD	364	220	CDN82213.1	14
947	33.6735	27.778	62.4	2.16e-11	8	198	120	27778	588	562	cydD	369	202	OLR35555.1	24
948	34.8639	29.268	64.3	3.73e-11	8	205	128	29268	588	562	cydD	369	221	MTT19804.1	23
950	34.8639	29.268	64.3	3.73e-11	8	205	128	29268	588	562	cydD	369	221	OLR35920.1	23
952	34.8639	29.268	64.3	3.73e-11	8	205	128	29268	588	562	cydD	369	221	CDN84323.1	23
954	35.2041	28.019	62	4.2e-11	8	207	131	28019	588	565	cydD	369	218	MTT20150.1	20
955	35.2041	28.019	62	4.2e-11	8	207	131	28019	588	565	cydD	369	218	OLR37496.1	20
956	35.2041	28.019	62	4.2e-11	8	207	131	28019	588	565	cydD	369	218	CDN81176.1	20
957	36.2245	29.108	63.2	4.38e-11	7	213	127	29108	588	570	cydD	369	221	MTT17916.1	22
958	36.2245	29.108	63.2	4.38e-11	7	213	127	29108	588	570	cydD	369	221	OLR36498.1	22
959	36.2245	29.108	62.8	6.98e-11	7	213	127	29108	588	570	cydD	369	251	CDN84880.1	52
960	32.8231	31.606	62.4	7.61e-11	10	193	113	31606	588	564	cydD	380	215	MTT20911.1	34
961	32.8231	31.606	62.4	7.61e-11	10	193	113	31606	588	564	cydD	380	215	OLR35239.1	34
962	32.8231	31.606	62.4	7.61e-11	10	193	113	31606	588	564	cydD	380	215	CDN81930.1	34
963	42.1769	27.823	61.6	8.72e-11	11	248	151	27823	588	581	cydD	353	267	CDN84944.1	29
964	32.9932	27.835	60.8	8.79e-11	8	194	117	27835	588	558	cydD	369	198	CDN83688.1	24
965	34.5238	30.542	60.8	9.34e-11	7	203	116	30542	588	564	cydD	376	227	MTT19029.1	36
966	34.5238	30.542	60.8	9.34e-11	7	203	116	30542	588	564	cydD	376	227	OLR37770.1	36
967	34.5238	30.542	60.8	9.34e-11	7	203	116	30542	588	564	cydD	376	227	CDN80889.1	36
968	38.9456	32.314	60.8	9.68e-11	10	229	110	32314	588	558	cydD	350	207	MTT17975.1	4
969	38.9456	32.314	60.8	9.68e-11	10	229	110	32314	588	558	cydD	350	207	OLR36441.1	4
970	38.9456	32.314	60.8	9.68e-11	10	229	110	32314	588	558	cydD	350	207	CDN84943.1	4
971	42.1769	27.823	61.2	1.03e-10	11	248	151	27823	588	581	cydD	353	247	MTT17976.1	9
972	42.1769	27.823	61.2	1.03e-10	11	248	151	27823	588	581	cydD	353	247	OLR36440.1	9
973	40.1361	28.814	60.8	1.15e-10	8	236	152	28814	588	574	cydD	348	229	MTT22255.1	1
974	40.1361	28.814	60.8	1.15e-10	8	236	152	28814	588	574	cydD	348	229	OLR29160.1	1
975	40.1361	28.814	60.8	1.15e-10	8	236	152	28814	588	574	cydD	348	229	CDN85185.1	1
976	39.966	28.085	60.5	1.43e-10	11	235	136	28085	588	566	cydD	350	221	MTT19402.1	2
977	39.966	28.085	60.5	1.43e-10	11	235	136	28085	588	566	cydD	350	221	OLR32822.1	2
978	41.3265	29.218	61.6	1.58e-10	9	243	143	29218	588	584	cydD	361	246	MTT19337.1	14
979	41.3265	29.218	61.6	1.58e-10	9	243	143	29218	588	584	cydD	361	246	OLR32886.1	14
980	41.3265	29.218	61.2	2.18e-10	9	243	143	29218	588	584	cydD	361	259	CDN84185.1	27
981	39.966	28.085	60.1	2.65e-10	11	235	136	28085	588	566	cydD	350	231	CDN84257.1	12
982	35.7143	28.095	60.1	4.36e-10	6	210	129	28095	588	570	cydD	376	252	MTT22072.1	50
983	35.7143	28.095	60.1	4.36e-10	6	210	129	28095	588	570	cydD	376	252	OLR37336.1	50
984	35.7143	28.095	60.1	4.36e-10	6	210	129	28095	588	570	cydD	376	252	CDN81792.1	50
985	36.7347	28.704	58.9	4.61e-10	9	216	121	28704	588	565	cydD	369	223	MTT19368.1	22
986	36.7347	28.704	58.9	4.61e-10	9	216	121	28704	588	565	cydD	369	223	OLR32856.1	22
987	36.7347	28.704	58.9	4.61e-10	9	216	121	28704	588	565	cydD	369	223	CDN84218.1	22
988	35.2041	31.401	58.5	7.91e-10	8	207	125	31401	588	563	cydD	369	232	MTT19369.1	31
989	35.2041	31.401	58.5	7.91e-10	8	207	125	31401	588	563	cydD	369	232	OLR32855.1	31
990	35.2041	31.401	58.5	7.91e-10	8	207	125	31401	588	563	cydD	369	232	CDN84219.1	31
991	36.3946	28.505	59.3	9.51e-10	9	214	131	28505	588	570	cydD	370	252	MTT19707.1	48
992	36.3946	28.505	59.3	9.51e-10	9	214	131	28505	588	570	cydD	370	252	OLR31826.1	48
993	36.3946	28.505	59.3	9.51e-10	9	214	131	28505	588	570	cydD	370	252	CDN83277.1	48
1190	100	100	77	4.49e-22	0	37	0	100000	37	37	cydX	1	37	MTT21445.1	1
1191	100	100	77	4.49e-22	0	37	0	100000	37	37	cydX	1	37	OLR37564.1	1
1192	100	100	77	4.49e-22	0	37	0	100000	37	37	cydX	1	37	CDN81106.1	1
1199	100	99.566	962	0	0	461	2	99566	461	461	cysS	1	461	MTT21912.1	1
1200	100	99.566	962	0	0	461	2	99566	461	461	cysS	1	461	OLR37742.1	1
1201	100	99.566	962	0	0	461	2	99566	461	461	cysS	1	461	CDN80918.1	1
1228	100	99.658	600	0	0	292	1	99658	292	292	dapA	1	292	MTT19509.1	1
1229	100	99.658	600	0	0	292	1	99658	292	292	dapA	1	292	OLR35421.1	1
1230	100	99.658	599	0	0	292	1	99658	292	292	dapA	1	298	CDN83133.1	7
1231	100.342	30.717	150	6.09e-44	4	293	196	30717	292	288	dapA	2	296	MTT18176.1	5
1232	100.342	30.717	150	6.09e-44	4	293	196	30717	292	288	dapA	2	296	OLR36240.1	5
1233	100.342	30.717	150	6.09e-44	4	293	196	30717	292	288	dapA	2	296	CDN85157.1	5
1234	101.712	30.303	138	2.94e-39	5	297	200	30303	292	292	dapA	2	299	MTT21875.1	4
1235	101.712	30.303	138	3.22e-39	5	297	200	30303	292	292	dapA	2	309	OLR30496.1	14
1236	101.712	30.303	138	4.56e-39	5	297	200	30303	292	292	dapA	2	317	CDN85236.1	22
1237	89.0411	32.692	115	6.38e-31	3	260	171	32692	292	260	dapA	4	265	MTT21504.1	7
1238	89.0411	32.692	115	6.38e-31	3	260	171	32692	292	260	dapA	4	265	OLR37620.1	7
1239	89.0411	32.692	115	6.38e-31	3	260	171	32692	292	260	dapA	4	265	CDN81046.1	7
1240	82.5342	28.216	100	2.53e-25	3	241	167	28216	292	243	dapA	4	242	MTT21302.1	7
1241	82.5342	28.216	100	2.53e-25	3	241	167	28216	292	243	dapA	4	242	OLR34733.1	7
1242	82.5342	28.216	100	2.53e-25	3	241	167	28216	292	243	dapA	4	242	CDN83962.1	7
1243	94.5205	25	97.4	5.66e-24	2	276	205	25000	292	276	dapA	2	279	MTT22055.1	5
1244	94.5205	25	97.4	5.66e-24	2	276	205	25000	292	276	dapA	2	279	OLR29340.1	5
1245	94.5205	25	97.4	5.66e-24	2	276	205	25000	292	276	dapA	2	279	CDN83645.1	5
1246	79.1096	27.273	86.3	5.46e-20	3	231	162	27273	292	228	dapA	2	235	MTT22116.1	7
1247	79.1096	27.273	86.3	5.46e-20	3	231	162	27273	292	228	dapA	2	235	OLR29446.1	7
1254	100	99.634	547	0	0	273	1	99634	273	273	dapB	1	273	MTT18900.1	1
1255	100	99.634	547	0	0	273	1	99634	273	273	dapB	1	273	OLR36666.1	1
1256	100	99.634	547	0	0	273	1	99634	273	273	dapB	1	273	CDN80400.1	1
1257	100	99.635	559	0	0	274	1	99635	274	274	dapD	1	274	MTT21192.1	1
1258	100	99.635	559	0	0	274	1	99635	274	274	dapD	1	274	OLR36815.1	1
1259	100	99.635	559	0	0	274	1	99635	274	274	dapD	1	274	CDN80553.1	1
1288	100	99.467	775	0	0	375	2	99467	375	375	dapE	1	375	MTT19516.1	1
1289	100	99.467	775	0	0	375	2	99467	375	375	dapE	1	375	OLR35413.1	1
1290	100	99.467	775	0	0	375	2	99467	375	375	dapE	1	375	CDN83126.1	1
1291	69.0667	28.958	79.3	1.07e-16	9	259	155	28958	375	245	dapE	4	253	MTT20530.1	7
1292	69.0667	28.958	79.3	1.07e-16	9	259	155	28958	375	245	dapE	4	253	OLR34292.1	7
1293	69.0667	28.958	79.3	1.11e-16	9	259	155	28958	375	245	dapE	4	266	CDN84802.1	20
1294	102.667	23.117	72.4	2.48e-14	12	385	256	23117	375	369	dapE	10	395	MTT20005.1	26
1295	102.667	23.117	72.4	2.48e-14	12	385	256	23117	375	369	dapE	10	395	OLR35068.1	26
1296	102.667	23.117	72.4	2.48e-14	12	385	256	23117	375	369	dapE	10	395	CDN83492.1	26
1308	100	99.635	565	0	0	274	1	99635	274	274	dapF	1	274	MTT21007.1	1
1309	100	99.635	565	0	0	274	1	99635	274	274	dapF	1	274	OLR34081.1	1
1310	100	99.635	565	0	0	274	1	99635	274	274	dapF	1	275	CDN84631.1	2
1314	100	99.482	390	3.1e-141	0	193	1	99482	193	193	dcd	1	193	MTT21400.1	1
1315	100	99.482	390	3.1e-141	0	193	1	99482	193	193	dcd	1	193	OLR33584.1	1
1316	100	99.482	390	3.1e-141	0	193	1	99482	193	193	dcd	1	193	CDN82742.1	1
1332	100	100	337	3.8e-121	0	169	0	100000	169	169	def	1	169	MTT21803.1	1
1333	100	100	337	3.8e-121	0	169	0	100000	169	169	def	1	169	OLR31408.1	1
1334	100	100	337	3.8e-121	0	169	0	100000	169	169	def	1	169	CDN84024.1	1
1342	100	99.592	999	0	0	490	2	99592	490	490	der	1	503	CDN83158.1	14
1343	100	99.592	996	0	0	490	2	99592	490	490	der	1	490	MTT19485.1	1
1344	100	99.592	996	0	0	490	2	99592	490	490	der	1	490	OLR35518.1	1
1345	18.5714	40.659	70.9	1.86e-13	1	91	51	40659	490	293	der	203	304	MTT21099.1	217
1346	33.4694	34.756	64.7	1.48e-11	5	164	87	34756	490	158	der	5	372	MTT21099.1	219
1347	18.5714	40.659	70.9	1.86e-13	1	91	51	40659	490	293	der	203	304	OLR35776.1	217
1348	33.4694	34.756	64.7	1.48e-11	5	164	87	34756	490	158	der	5	372	OLR35776.1	219
1349	18.5714	40.659	70.9	1.86e-13	1	91	51	40659	490	293	der	203	304	CDN84540.1	217
1350	33.4694	34.756	64.7	1.48e-11	5	164	87	34756	490	158	der	5	372	CDN84540.1	219
1351	31.2245	29.412	59.7	2.98e-10	3	153	101	29412	490	151	der	5	162	MTT19435.1	11
1353	31.2245	29.412	59.7	2.98e-10	3	153	101	29412	490	151	der	5	162	OLR35492.1	11
1355	31.2245	29.412	59.7	2.98e-10	3	153	101	29412	490	151	der	5	162	CDN83209.1	11
1437	100	99.507	822	0	0	406	2	99507	406	406	dfp	1	406	MTT19875.1	1
1438	100	99.507	822	0	0	406	2	99507	406	406	dfp	1	406	OLR35849.1	1
1439	100	99.507	822	0	0	406	2	99507	406	406	dfp	1	430	CDN84397.1	25
1446	51.8519	54.286	66.2	1.6e-14	0	70	32	54286	135	76	dicA	7	87	MTT22423.1	18
1447	51.8519	54.286	66.2	1.6e-14	0	70	32	54286	135	76	dicA	7	87	OLR37352.1	18
1448	51.8519	54.286	66.2	1.6e-14	0	70	32	54286	135	76	dicA	7	87	CDN81810.1	18
1471	100	100	968	0	0	467	0	100000	467	467	dnaA	1	467	MTT21105.1	1
1472	100	100	968	0	0	467	0	100000	467	467	dnaA	1	467	OLR35781.1	1
1473	100	100	968	0	0	467	0	100000	467	467	dnaA	1	467	CDN84535.1	1
1474	49.4647	27.706	80.5	9.72e-18	7	231	148	27706	467	364	dnaA	137	224	OLR35516.1	10
1475	53.5332	27.6	81.3	9.72e-18	9	250	158	27600	467	364	dnaA	119	247	MTT19503.1	17
1476	53.5332	27.6	81.3	9.72e-18	9	250	158	27600	467	364	dnaA	119	247	CDN83139.1	17
1502	100	99.151	952	0	0	471	4	99151	471	471	dnaB	1	483	CDN84901.1	13
1503	100	99.151	951	0	0	471	4	99151	471	471	dnaB	1	471	MTT17935.1	1
1504	100	99.151	951	0	0	471	4	99151	471	471	dnaB	1	471	OLR36480.1	1
1505	90.2335	36	249	5.32e-78	8	425	262	36000	471	448	dnaB	29	428	MTT20447.1	9
1506	90.2335	36	249	5.32e-78	8	425	262	36000	471	448	dnaB	29	428	OLR34202.1	9
1507	90.2335	36	249	5.32e-78	8	425	262	36000	471	448	dnaB	29	428	CDN82459.1	9
1514	100	100	510	0	0	245	0	100000	245	245	dnaC	1	245	MTT18973.1	1
1515	100	100	510	0	0	245	0	100000	245	245	dnaC	1	245	OLR36594.1	1
1516	100	100	510	0	0	245	0	100000	245	245	dnaC	1	245	CDN85308.1	1
1517	99.1837	48.148	248	1.41e-83	2	243	123	48148	245	241	dnaC	1	242	MTT22346.1	1
1518	99.1837	48.148	248	1.41e-83	2	243	123	48148	245	241	dnaC	1	242	OLR37356.1	1
1519	99.1837	48.148	248	1.41e-83	2	243	123	48148	245	241	dnaC	1	242	CDN81814.1	1
1549	100	99.828	2382	0	0	1160	2	99828	1160	1160	dnaE	1	1160	MTT21174.1	1
1550	100	99.828	2382	0	0	1160	2	99828	1160	1160	dnaE	1	1160	OLR36833.1	1
1551	100	99.828	2382	0	0	1160	2	99828	1160	1160	dnaE	1	1160	CDN80571.1	1
1552	85.2586	30.03	367	8.75e-109	25	989	552	30030	1160	893	dnaE	9	956	OLR32130.1	4
1576	100	99.828	1201	0	0	581	1	99828	581	581	dnaG	1	581	MTT20317.1	1
1577	100	99.828	1201	0	0	581	1	99828	581	581	dnaG	1	581	OLR35681.1	1
1578	100	99.828	1201	0	0	581	1	99828	581	581	dnaG	1	581	CDN83817.1	1
1588	100	100	753	0	0	366	0	100000	366	366	dnaN	1	366	MTT21106.1	1
1589	100	100	753	0	0	366	0	100000	366	366	dnaN	1	366	OLR35782.1	1
1590	100	100	753	0	0	366	0	100000	366	366	dnaN	1	366	CDN84534.1	1
1603	100	100	363	3.62e-131	0	179	0	100000	179	179	dnaT	1	179	MTT18972.1	1
1604	100	100	363	3.62e-131	0	179	0	100000	179	179	dnaT	1	179	OLR36595.1	1
1605	100	100	363	3.62e-131	0	179	0	100000	179	179	dnaT	1	179	CDN85309.1	1
1617	100	99.378	1300	0	0	643	4	99378	643	643	dnaX	1	643	MTT19057.1	1
1618	100	99.378	1300	0	0	643	4	99378	643	643	dnaX	1	643	OLR37797.1	1
1619	100	99.378	1300	0	0	643	4	99378	643	643	dnaX	1	643	CDN80860.1	1
1620	21.6174	30.935	62.4	8.18e-11	1	139	93	30935	643	170	dnaX	35	159	MTT18760.1	21
1621	21.6174	30.935	62.4	8.18e-11	1	139	93	30935	643	170	dnaX	35	159	OLR37122.1	21
1622	21.6174	30.935	62.4	8.18e-11	1	139	93	30935	643	170	dnaX	35	159	CDN81556.1	21
1623	30.7932	25.253	60.5	5.19e-10	6	198	115	25253	643	194	dnaX	2	181	MTT20068.1	12
1624	30.7932	25.253	60.5	5.19e-10	6	198	115	25253	643	194	dnaX	2	181	OLR37417.1	12
1625	30.7932	25.253	60.5	5.19e-10	6	198	115	25253	643	194	dnaX	2	181	CDN81258.1	12
1650	100	99.338	307	8.38e-110	0	151	1	99338	151	151	dut	1	152	OLR35848.1	2
1651	100	99.338	307	8.38e-110	0	151	1	99338	151	151	dut	1	152	CDN84398.1	2
1652	100	99.338	306	9.44e-110	0	151	1	99338	151	151	dut	1	151	MTT19876.1	1
1662	100	99.749	823	0	0	398	1	99749	398	398	dxr	1	398	MTT21185.1	1
1663	100	99.749	823	0	0	398	1	99749	398	398	dxr	1	398	OLR36822.1	1
1664	100	99.749	823	0	0	398	1	99749	398	398	dxr	1	398	CDN80560.1	1
1671	100	99.677	1274	0	0	620	2	99677	620	620	dxs	1	620	MTT19106.1	1
1672	100	99.677	1274	0	0	620	2	99677	620	620	dxs	1	620	OLR37846.1	1
1673	100	99.677	1274	0	0	620	2	99677	620	620	dxs	1	620	CDN80809.1	1
1674	44.0323	30.769	102	2.5e-24	6	273	179	30769	620	619	dxs	355	311	MTT20657.1	41
1675	44.0323	30.769	102	2.5e-24	6	273	179	30769	620	619	dxs	355	311	OLR37708.1	41
1676	44.0323	30.769	102	2.5e-24	6	273	179	30769	620	619	dxs	355	311	CDN80953.1	41
1698	100	100	871	0	0	432	0	100000	432	432	eno	1	432	MTT19607.1	1
1699	100	100	871	0	0	432	0	100000	432	432	eno	1	432	OLR34627.1	1
1700	100	100	871	0	0	432	0	100000	432	432	eno	1	432	CDN83383.1	1
1711	100	99.668	617	0	0	301	1	99668	301	301	era	1	301	MTT19435.1	1
1712	100	99.668	617	0	0	301	1	99668	301	301	era	1	301	OLR35492.1	1
1713	100	99.668	617	0	0	301	1	99668	301	301	era	1	301	CDN83209.1	1
1714	50.8306	30.719	60.8	7.86e-11	4	153	99	30719	301	162	era	11	151	MTT19485.1	5
1716	50.8306	30.719	60.8	7.86e-11	4	153	99	30719	301	162	era	11	151	OLR35518.1	5
1718	50.8306	30.719	60.8	8.28e-11	4	153	99	30719	301	162	era	11	164	CDN83158.1	18
1777	100	100	233	1.51e-81	0	114	0	100000	114	114	erpA	1	114	MTT21200.1	1
1778	100	100	233	1.51e-81	0	114	0	100000	114	114	erpA	1	114	OLR36807.1	1
1779	100	100	233	2.03e-81	0	114	0	100000	114	114	erpA	1	125	CDN80545.1	12
1780	98.2456	39.286	74.7	3.57e-19	4	112	63	39286	114	114	erpA	5	109	CDN83176.1	1
1781	96.4912	40	74.3	4.64e-19	4	110	61	40000	114	114	erpA	7	107	MTT19468.1	1
1782	96.4912	40	74.3	4.64e-19	4	110	61	40000	114	114	erpA	7	107	OLR35460.1	1
1783	93.8596	31.776	55.5	1.56e-11	3	107	70	31776	114	114	erpA	9	122	MTT18353.1	18
1784	93.8596	31.776	55.5	1.56e-11	3	107	70	31776	114	114	erpA	9	122	OLR34837.1	18
1785	93.8596	31.776	55.5	1.56e-11	3	107	70	31776	114	114	erpA	9	122	CDN82186.1	18
1801	100	99.419	352	2.07e-126	0	172	1	99419	172	172	fabA	1	208	CDN81420.1	37
1802	100	99.419	349	6.22e-126	0	172	1	99419	172	172	fabA	1	172	MTT18631.1	1
1803	100	99.419	349	6.22e-126	0	172	1	99419	172	172	fabA	1	172	OLR37376.1	1
1810	100	100	834	0	0	406	0	100000	406	406	fabB	1	406	MTT17817.1	1
1811	100	100	834	0	0	406	0	100000	406	406	fabB	1	406	OLR36195.1	1
1812	100	100	834	0	0	406	0	100000	406	406	fabB	1	406	CDN83000.1	1
1813	101.97	36.715	224	1.18e-69	8	414	247	36715	406	404	fabB	2	413	MTT18756.1	4
1814	101.97	36.715	224	1.18e-69	8	414	247	36715	406	404	fabB	2	413	OLR37118.1	4
1815	101.97	36.715	224	1.18e-69	8	414	247	36715	406	404	fabB	2	413	CDN81552.1	4
1816	86.4532	26.496	102	9.16e-24	12	351	213	26496	406	406	fabB	81	452	MTT21682.1	122
1817	86.4532	26.496	102	9.16e-24	12	351	213	26496	406	406	fabB	81	452	OLR32763.1	122
1818	86.4532	26.496	102	9.16e-24	12	351	213	26496	406	406	fabB	81	452	CDN82602.1	122
1837	100	100	630	0	0	309	0	100000	309	309	fabD	1	309	MTT18753.1	1
1838	100	100	630	0	0	309	0	100000	309	309	fabD	1	309	OLR37115.1	1
1839	100	100	630	0	0	309	0	100000	309	309	fabD	1	309	CDN81549.1	1
1840	93.5275	25.606	63.5	1.62e-11	9	289	196	25606	309	287	fabD	6	828	MTT21682.1	552
1841	93.5275	25.606	63.5	1.62e-11	9	289	196	25606	309	287	fabD	6	828	OLR32763.1	552
1842	93.5275	25.606	63.5	1.62e-11	9	289	196	25606	309	287	fabD	6	828	CDN82602.1	552
1849	100	100	484	3.88e-177	0	244	0	100000	244	244	fabG	1	244	MTT18754.1	1
1850	100	100	484	3.88e-177	0	244	0	100000	244	244	fabG	1	244	OLR37116.1	1
1851	100	100	484	3.88e-177	0	244	0	100000	244	244	fabG	1	244	CDN81550.1	1
1852	106.967	34.866	157	1.34e-47	5	261	151	34866	244	243	fabG	2	264	MTT20649.1	4
1853	106.967	34.866	157	1.34e-47	5	261	151	34866	244	243	fabG	2	264	OLR37716.1	4
1854	106.967	34.866	157	1.34e-47	5	261	151	34866	244	243	fabG	2	264	CDN80945.1	4
1855	102.869	35.857	153	2.78e-46	5	251	148	35857	244	240	fabG	2	252	MTT19552.1	3
1856	102.869	35.857	153	2.78e-46	5	251	148	35857	244	240	fabG	2	252	OLR35379.1	3
1857	102.869	35.857	153	4.56e-46	5	251	148	35857	244	240	fabG	2	274	CDN83090.1	25
1858	100.82	35.366	146	1.42e-43	5	246	151	35366	244	240	fabG	1	249	MTT20016.1	6
1859	100.82	35.366	146	1.42e-43	5	246	151	35366	244	240	fabG	1	249	OLR35057.1	6
1860	100.82	35.366	146	1.42e-43	5	246	151	35366	244	240	fabG	1	249	CDN83481.1	6
1861	101.639	33.871	145	4.91e-43	4	248	159	33871	244	244	fabG	1	260	MTT19617.1	14
1862	101.639	33.871	145	4.91e-43	4	248	159	33871	244	244	fabG	1	260	OLR34616.1	14
1863	101.639	33.871	145	1.15e-42	4	248	159	33871	244	244	fabG	1	285	CDN83372.1	39
1864	101.639	36.29	140	5.26e-41	4	248	151	36290	244	241	fabG	1	258	MTT20648.1	11
1865	101.639	36.29	140	5.26e-41	4	248	151	36290	244	241	fabG	1	258	OLR37717.1	11
1866	101.639	36.29	140	5.26e-41	4	248	151	36290	244	241	fabG	1	258	CDN80944.1	11
1867	99.5902	32.51	137	6.3e-40	1	243	161	32510	244	240	fabG	1	246	MTT21467.1	4
1868	99.5902	32.51	137	6.3e-40	1	243	161	32510	244	240	fabG	1	246	OLR37585.1	4
1869	99.5902	32.51	137	6.3e-40	1	243	161	32510	244	240	fabG	1	246	CDN81081.1	4
1870	102.459	36.4	131	6.53e-38	6	250	142	36400	244	240	fabG	1	243	MTT20672.1	1
1871	102.459	36.4	131	6.53e-38	6	250	142	36400	244	240	fabG	1	243	OLR37693.1	1
1872	102.459	36.4	131	6.53e-38	6	250	142	36400	244	240	fabG	1	243	CDN80969.1	1
1873	111.066	33.579	122	4.1e-34	7	271	138	33579	244	240	fabG	1	264	MTT17901.1	5
1874	111.066	33.579	122	4.1e-34	7	271	138	33579	244	240	fabG	1	264	OLR36515.1	5
1875	111.066	33.579	122	4.1e-34	7	271	138	33579	244	240	fabG	1	264	CDN84863.1	5
1876	99.5902	32.922	116	5.35e-32	3	243	158	32922	244	243	fabG	6	245	MTT17639.1	3
1877	99.5902	32.922	116	5.35e-32	3	243	158	32922	244	243	fabG	6	245	OLR36014.1	3
1878	99.5902	32.922	116	5.35e-32	3	243	158	32922	244	243	fabG	6	245	CDN82817.1	3
1879	97.9508	35.983	111	2.78e-30	6	239	142	35983	244	239	fabG	3	233	MTT18161.1	4
1880	97.9508	35.983	111	2.78e-30	6	239	142	35983	244	239	fabG	3	233	OLR36261.1	4
1881	97.9508	35.983	111	2.78e-30	6	239	142	35983	244	239	fabG	3	233	CDN85135.1	4
1882	80.3279	34.184	103	3.26e-27	2	196	125	34184	244	198	fabG	7	197	MTT18460.1	2
1883	80.3279	34.184	103	3.26e-27	2	196	125	34184	244	198	fabG	7	197	OLR34433.1	2
1884	80.3279	34.184	103	4.28e-27	2	196	125	34184	244	198	fabG	7	202	CDN82074.1	7
1885	100	32.377	101	2.1e-26	4	244	158	32377	244	239	fabG	1	248	MTT18417.1	7
1886	100	32.377	101	2.1e-26	4	244	158	32377	244	239	fabG	1	248	OLR34475.1	7
1887	100	32.377	101	2.1e-26	4	244	158	32377	244	239	fabG	1	248	CDN82121.1	7
1888	104.918	29.297	97.1	1.29e-24	6	256	163	29297	244	243	fabG	6	258	MTT19682.1	3
1889	104.918	29.297	97.1	1.29e-24	6	256	163	29297	244	243	fabG	6	258	OLR34555.1	3
1890	104.918	29.297	97.1	1.29e-24	6	256	163	29297	244	243	fabG	6	258	CDN83305.1	3
1891	100.82	29.675	91.7	2.63e-22	6	246	159	29675	244	243	fabG	8	293	MTT20244.1	52
1892	100.82	29.675	91.7	2.63e-22	6	246	159	29675	244	243	fabG	8	293	OLR35722.1	52
1893	100.82	29.675	91.3	3.02e-22	6	246	159	29675	244	243	fabG	8	294	CDN83742.1	53
1894	99.1803	27.686	84.7	5.08e-20	5	242	159	27686	244	240	fabG	6	245	MTT20864.1	13
1895	99.1803	27.686	84.7	5.08e-20	5	242	159	27686	244	240	fabG	6	245	OLR35191.1	13
1896	99.1803	27.686	84.7	5.08e-20	5	242	159	27686	244	240	fabG	6	245	CDN81883.1	13
1897	105.328	28.016	76.6	5.34e-17	6	257	164	28016	244	243	fabG	6	260	MTT18119.1	6
1898	105.328	28.016	76.6	5.34e-17	6	257	164	28016	244	243	fabG	6	260	OLR36302.1	6
1899	105.328	28.016	76.6	5.34e-17	6	257	164	28016	244	243	fabG	6	260	CDN85092.1	6
1900	78.6885	26.563	67.4	8.13e-14	3	192	137	26563	244	196	fabG	6	191	OLR38058.1	3
1901	78.6885	26.563	67.4	1.02e-13	3	192	137	26563	244	196	fabG	6	204	MTT19031.1	16
1902	78.6885	26.563	67.4	1.02e-13	3	192	137	26563	244	196	fabG	6	204	CDN80887.1	16
1930	100	99.685	649	0	0	317	1	99685	317	317	fabH	1	317	MTT18752.1	1
1931	100	99.685	649	0	0	317	1	99685	317	317	fabH	1	317	OLR37114.1	1
1932	100	99.685	649	0	0	317	1	99685	317	317	fabH	1	317	CDN81548.1	1
1933	99.6845	28.165	114	1.34e-29	6	316	215	28165	317	309	fabH	4	327	MTT20739.1	14
1934	99.6845	28.165	114	1.34e-29	6	316	215	28165	317	309	fabH	4	327	OLR37317.1	14
1935	99.6845	28.165	114	1.34e-29	6	316	215	28165	317	309	fabH	4	327	CDN81769.1	14
1939	100	99.618	536	0	0	262	1	99618	262	262	fabI	1	262	MTT20885.1	1
1940	100	99.618	536	0	0	262	1	99618	262	262	fabI	1	262	OLR35213.1	1
1941	100	99.618	536	0	0	262	1	99618	262	262	fabI	1	262	CDN81903.1	1
1942	97.7099	28.125	72	2.45e-15	8	256	158	28125	262	249	fabI	4	248	MTT18417.1	9
1943	97.7099	28.125	72	2.45e-15	8	256	158	28125	262	249	fabI	4	248	OLR34475.1	9
1944	97.7099	28.125	72	2.45e-15	8	256	158	28125	262	249	fabI	4	248	CDN82121.1	9
1945	100.382	26.616	62.4	8.12e-12	5	263	175	26616	262	253	fabI	1	277	CDN83090.1	23
1946	100.382	26.616	62.4	8.41e-12	5	263	175	26616	262	253	fabI	1	255	MTT19552.1	1
1947	100.382	26.616	62.4	8.41e-12	5	263	175	26616	262	253	fabI	1	255	OLR35379.1	1
1948	98.855	25.869	60.1	6.01e-11	6	259	169	25869	262	250	fabI	2	291	CDN83742.1	46
1949	98.855	25.869	60.1	6.04e-11	6	259	169	25869	262	250	fabI	2	290	MTT20244.1	45
1950	98.855	25.869	60.1	6.04e-11	6	259	169	25869	262	250	fabI	2	290	OLR35722.1	45
1951	96.9466	25.984	58.9	9.38e-11	8	254	166	25984	262	251	fabI	1	235	MTT18161.1	1
1952	96.9466	25.984	58.9	9.38e-11	8	254	166	25984	262	251	fabI	1	235	OLR36261.1	1
1953	96.9466	25.984	58.9	9.38e-11	8	254	166	25984	262	251	fabI	1	235	CDN85135.1	1
1954	100.382	28.137	57	4.24e-10	13	263	151	28137	262	250	fabI	4	246	MTT21467.1	6
1955	100.382	28.137	57	4.24e-10	13	263	151	28137	262	250	fabI	4	246	OLR37585.1	6
1956	100.382	28.137	57	4.24e-10	13	263	151	28137	262	250	fabI	4	246	CDN81081.1	6
1986	100	100	307	7.25e-110	0	151	0	100000	151	151	fabZ	1	151	MTT21178.1	1
1987	100	100	307	7.25e-110	0	151	0	100000	151	151	fabZ	1	151	OLR36829.1	1
1988	100	99.338	305	7.57e-109	0	151	1	99338	151	151	fabZ	1	182	CDN80567.1	32
2000	100	100	748	0	0	359	0	100000	359	359	fbaA	1	387	CDN83542.1	29
2001	100	100	747	0	0	359	0	100000	359	359	fbaA	1	359	MTT19954.1	1
2002	100	100	747	0	0	359	0	100000	359	359	fbaA	1	359	OLR35114.1	1
2003	90.2507	25	86.7	9.62e-20	10	324	180	25000	359	342	fbaA	19	269	CDN82769.1	9
2004	90.2507	25	86.7	9.91e-20	10	324	180	25000	359	342	fbaA	19	267	MTT17598.1	7
2005	90.2507	25	86.7	9.91e-20	10	324	180	25000	359	342	fbaA	19	267	OLR33607.1	7
2006	85.7939	24.026	81.6	5.95e-18	9	308	184	24026	359	326	fbaA	19	264	MTT21268.1	7
2007	85.7939	24.026	81.6	5.95e-18	9	308	184	24026	359	326	fbaA	19	264	OLR34699.1	7
2008	85.7939	24.026	81.6	5.95e-18	9	308	184	24026	359	326	fbaA	19	264	CDN83999.1	7
2009	89.6936	25.776	81.3	8.33e-18	12	322	176	25776	359	342	fbaA	21	267	MTT21716.1	9
2010	89.6936	25.776	81.3	8.33e-18	12	322	176	25776	359	342	fbaA	21	267	OLR34805.1	9
2011	89.6936	25.776	81.3	8.33e-18	12	322	176	25776	359	342	fbaA	21	267	CDN83887.1	9
2012	79.1086	24.296	79.7	2.48e-17	8	284	169	24296	359	300	fbaA	18	243	MTT19893.1	5
2013	79.1086	24.296	79.7	2.48e-17	8	284	169	24296	359	300	fbaA	18	243	OLR35831.1	5
2014	79.1086	24.296	79.7	2.48e-17	8	284	169	24296	359	300	fbaA	18	243	CDN84415.1	5
2015	76.8802	29.348	76.6	3.17e-16	12	276	143	29348	359	288	fbaA	17	231	MTT19894.1	4
2016	76.8802	29.348	76.6	3.17e-16	12	276	143	29348	359	288	fbaA	17	231	OLR35830.1	4
2017	76.8802	29.348	76.6	3.17e-16	12	276	143	29348	359	288	fbaA	17	231	CDN84416.1	4
2018	76.0446	24.542	68.2	1.99e-13	9	273	148	24542	359	291	fbaA	25	232	MTT18266.1	12
2019	76.0446	24.542	68.2	1.99e-13	9	273	148	24542	359	291	fbaA	25	232	OLR34927.1	12
2020	76.0446	24.542	68.2	1.99e-13	9	273	148	24542	359	291	fbaA	25	232	CDN82277.1	12
2021	65.1811	28.632	64.7	4.06e-12	8	234	130	28632	359	322	fbaA	94	267	MTT19377.1	66
2022	65.1811	28.632	64.7	4.06e-12	8	234	130	28632	359	322	fbaA	94	267	OLR32847.1	66
2023	65.1811	28.632	64.7	4.06e-12	8	234	130	28632	359	322	fbaA	94	267	CDN84228.1	66
2039	100	99.099	226	3.38e-79	0	111	1	99099	111	111	fdx	1	111	MTT19471.1	1
2040	100	99.099	226	3.38e-79	0	111	1	99099	111	111	fdx	1	111	OLR35457.1	1
2041	100	99.099	226	3.38e-79	0	111	1	99099	111	111	fdx	1	111	CDN83172.1	1
2054	100	100	911	0	0	453	0	100000	453	453	ffh	1	453	MTT19735.1	1
2055	100	100	911	0	0	453	0	100000	453	453	ffh	1	453	OLR31800.1	1
2056	100	100	911	0	0	453	0	100000	453	453	ffh	1	453	CDN83248.1	1
2057	58.4989	33.208	151	5.31e-41	3	265	166	33208	453	299	ffh	41	498	MTT19353.1	239
2058	58.4989	33.208	151	5.31e-41	3	265	166	33208	453	299	ffh	41	498	OLR32871.1	239
2059	58.4989	33.208	151	5.31e-41	3	265	166	33208	453	299	ffh	41	498	CDN84203.1	239
2081	100	100	361	1.88e-130	0	176	0	100000	176	176	fldA	1	176	MTT21494.1	1
2082	100	100	361	1.88e-130	0	176	0	100000	176	176	fldA	1	176	OLR37609.1	1
2083	100	100	360	2.27e-129	0	176	0	100000	176	176	fldA	1	215	CDN81055.1	40
2084	93.75	43.636	150	4.7e-47	1	165	92	43636	176	168	fldA	5	168	MTT19981.1	4
2085	93.75	43.636	150	4.7e-47	1	165	92	43636	176	168	fldA	5	168	OLR35092.1	4
2086	93.75	43.636	150	4.7e-47	1	165	92	43636	176	168	fldA	5	168	CDN83515.1	4
2093	99.6825	97.771	630	0	0	314	7	97771	315	314	fmt	1	314	MTT21804.1	1
2094	99.6825	97.771	630	0	0	314	7	97771	315	314	fmt	1	314	OLR31409.1	1
2095	99.6825	97.771	630	0	0	314	7	97771	315	314	fmt	1	314	CDN84025.1	1
2096	93.6508	29.831	139	3.37e-37	4	295	200	29831	315	300	fmt	7	292	MTT17753.1	4
2097	93.6508	29.831	139	3.37e-37	4	295	200	29831	315	300	fmt	7	292	OLR36131.1	4
2098	93.6508	29.831	139	3.37e-37	4	295	200	29831	315	300	fmt	7	292	CDN82934.1	4
2108	100	100	333	7.1e-120	0	159	0	100000	159	159	folA	1	159	MTT18883.1	1
2109	100	100	333	7.1e-120	0	159	0	100000	159	159	folA	1	159	OLR36859.1	1
2110	100	100	334	1.12e-119	0	159	0	100000	159	159	folA	1	204	CDN80418.1	46
2111	96.2264	36.601	99.4	1.55e-27	3	153	91	36601	159	150	folA	2	158	OLR28938.1	8
2112	79.8742	37.795	87	1.04e-22	3	127	73	37795	159	126	folA	2	123	OLR32103.1	1
2113	100.629	30.625	80.5	3.05e-20	5	160	102	30625	159	158	folA	2	156	MTT22082.1	3
2114	100.629	30.625	80.5	3.05e-20	5	160	102	30625	159	158	folA	2	156	CDN85454.1	3
2118	100	100	246	1.05e-86	0	122	0	100000	122	122	folB	1	123	CDN83809.1	2
2119	100	100	246	1.24e-86	0	122	0	100000	122	122	folB	1	122	MTT20309.1	1
2120	100	100	246	1.24e-86	0	122	0	100000	122	122	folB	1	122	OLR35675.1	1
2121	90.1639	24.545	52.4	2.8e-10	0	110	83	24545	122	112	folB	3	116	MTT17798.1	7
2122	90.1639	24.545	52.4	2.8e-10	0	110	83	24545	122	112	folB	3	116	OLR36176.1	7
2123	90.1639	24.545	52.4	2.8e-10	0	110	83	24545	122	112	folB	3	116	CDN82981.1	7
2127	100	99.289	854	0	0	422	3	99289	422	422	folC	1	422	MTT17809.1	1
2128	100	99.289	854	0	0	422	3	99289	422	422	folC	1	422	OLR36187.1	1
2129	100	99.289	854	0	0	422	3	99289	422	422	folC	1	422	CDN82992.1	1
2148	100	99.306	581	0	0	288	2	99306	288	288	folD	1	288	MTT21915.1	1
2149	100	99.306	581	0	0	288	2	99306	288	288	folD	1	288	OLR37739.1	1
2150	100	99.306	581	0	0	288	2	99306	288	288	folD	1	288	CDN80921.1	1
2154	100	100	460	4.8e-168	0	222	0	100000	222	222	folE	1	222	MTT17655.1	1
2155	100	100	460	4.8e-168	0	222	0	100000	222	222	folE	1	222	OLR36029.1	1
2156	100	100	460	4.8e-168	0	222	0	100000	222	222	folE	1	222	CDN82832.1	1
2166	100	99.291	577	0	0	282	2	99291	282	282	folP	1	282	MTT21343.1	1
2167	100	99.291	577	0	0	282	2	99291	282	282	folP	1	282	OLR34770.1	1
2168	100	99.291	576	0	0	282	2	99291	282	282	folP	1	304	CDN83921.1	23
2169	95.0355	33.209	125	5.83e-35	6	268	170	33209	282	280	folP	17	269	MTT22283.1	7
2170	87.234	31.301	118	5.62e-32	4	246	163	31301	282	257	folP	17	248	MTT22085.1	4
2171	87.234	31.301	118	5.62e-32	4	246	163	31301	282	257	folP	17	248	OLR28941.1	4
2172	87.234	31.301	118	5.62e-32	4	246	163	31301	282	257	folP	17	248	CDN85457.1	4
2185	100	100	367	1.13e-132	0	185	0	100000	185	185	frr	1	185	MTT21186.1	1
2186	100	100	367	1.13e-132	0	185	0	100000	185	185	frr	1	185	OLR36821.1	1
2187	100	100	367	1.13e-132	0	185	0	100000	185	185	frr	1	185	CDN80559.1	1
2194	100	100	855	0	0	420	0	100000	420	420	ftsA	1	420	MTT18832.1	1
2195	100	100	855	0	0	420	0	100000	420	420	ftsA	1	420	OLR36734.1	1
2196	100	100	855	0	0	420	0	100000	420	420	ftsA	1	420	CDN80470.1	1
2218	100	99.029	210	5.36e-73	0	103	1	99029	103	103	ftsB	1	103	MTT19635.1	1
2219	100	99.029	210	5.36e-73	0	103	1	99029	103	103	ftsB	1	103	OLR34598.1	1
2220	100	99.029	210	5.36e-73	0	103	1	99029	103	103	ftsB	1	103	CDN83353.1	1
2232	100	100	1316	0	0	644	0	100000	644	644	ftsH	1	644	MTT21342.1	1
2233	100	100	1316	0	0	644	0	100000	644	644	ftsH	1	644	OLR34769.1	1
2234	100	100	1316	0	0	644	0	100000	644	644	ftsH	1	644	CDN83922.1	1
2301	100	99.66	1199	0	0	588	2	99660	588	588	ftsI	1	588	MTT18842.1	1
2302	100	99.66	1199	0	0	588	2	99660	588	588	ftsI	1	588	OLR36724.1	1
2303	100	99.66	1199	0	0	588	2	99660	588	588	ftsI	1	588	CDN80460.1	1
2304	108.163	25	139	3.93e-35	22	636	370	25000	588	574	ftsI	15	617	MTT20708.1	13
2305	108.163	25	139	3.93e-35	22	636	370	25000	588	574	ftsI	15	617	OLR37657.1	13
2306	108.163	25	139	3.93e-35	22	636	370	25000	588	574	ftsI	15	617	CDN81007.1	13
2329	100	100	246	1.26e-86	0	121	0	100000	121	121	ftsL	1	121	MTT18843.1	1
2330	100	100	246	1.26e-86	0	121	0	100000	121	121	ftsL	1	121	OLR36723.1	1
2331	100	100	246	1.26e-86	0	121	0	100000	121	121	ftsL	1	121	CDN80459.1	1
2339	100	99.638	564	0	0	276	1	99638	276	276	ftsQ	1	276	MTT18833.1	1
2340	100	99.638	564	0	0	276	1	99638	276	276	ftsQ	1	276	OLR36733.1	1
2341	100	99.638	564	0	0	276	1	99638	276	276	ftsQ	1	276	CDN80469.1	1
2354	100	100	823	0	0	414	0	100000	414	414	ftsW	1	414	MTT18837.1	1
2355	100	100	823	0	0	414	0	100000	414	414	ftsW	1	414	OLR36729.1	1
2356	100	100	822	0	0	414	0	100000	414	414	ftsW	1	415	CDN80465.1	2
2357	76.57	31.861	157	8.53e-45	5	317	206	31861	414	403	ftsW	91	365	MTT20707.1	55
2358	76.57	31.861	157	8.53e-45	5	317	206	31861	414	403	ftsW	91	365	OLR37658.1	55
2359	76.57	31.861	157	8.53e-45	5	317	206	31861	414	403	ftsW	91	365	CDN81006.1	55
2375	100.201	98.193	955	0	1	498	8	98193	497	497	ftsY	1	498	MTT19353.1	1
2376	100.201	98.193	955	0	1	498	8	98193	497	497	ftsY	1	498	OLR32871.1	1
2377	100.201	98.193	955	0	1	498	8	98193	497	497	ftsY	1	498	CDN84203.1	1
2378	62.5755	32.797	159	4.98e-44	6	311	189	32797	497	497	ftsY	195	299	MTT19735.1	1
2379	62.5755	32.797	159	4.98e-44	6	311	189	32797	497	497	ftsY	195	299	OLR31800.1	1
2380	62.5755	32.797	159	4.98e-44	6	311	189	32797	497	497	ftsY	195	299	CDN83248.1	1
2406	100	100	763	0	0	383	0	100000	383	383	ftsZ	1	383	MTT18831.1	1
2407	100	100	763	0	0	383	0	100000	383	383	ftsZ	1	383	OLR36735.1	1
2408	100	100	763	0	0	383	0	100000	383	383	ftsZ	1	383	CDN80471.1	1
2409	100	100	1451	0	0	704	0	100000	704	704	fusA	1	704	MTT19235.1	1
2410	100	100	1451	0	0	704	0	100000	704	704	fusA	1	704	OLR33711.1	1
2411	100	100	1451	0	0	704	0	100000	704	704	fusA	1	704	CDN84081.1	1
2412	70.0284	25.963	150	2.92e-39	12	493	306	25963	704	481	fusA	7	461	MTT18961.1	10
2413	70.0284	25.963	150	2.92e-39	12	493	306	25963	704	481	fusA	7	461	OLR36606.1	10
2414	70.0284	25.963	150	2.92e-39	12	493	306	25963	704	481	fusA	7	461	CDN85320.1	10
2415	49.0057	28.696	104	1.3e-23	10	345	200	28696	704	331	fusA	7	320	MTT20613.1	2
2416	35.2273	27.016	70.5	6.25e-13	8	248	139	27016	704	505	fusA	278	411	MTT20613.1	186
2418	49.0057	28.696	104	1.3e-23	10	345	200	28696	704	331	fusA	7	320	OLR34377.1	2
2419	35.2273	27.016	70.5	6.25e-13	8	248	139	27016	704	505	fusA	278	411	OLR34377.1	186
2421	49.0057	28.696	104	1.3e-23	10	345	200	28696	704	331	fusA	7	320	CDN84709.1	2
2422	35.2273	27.016	70.5	6.25e-13	8	248	139	27016	704	505	fusA	278	411	CDN84709.1	186
2424	22.017	35.484	89.7	5.91e-19	2	155	95	35484	704	165	fusA	11	154	MTT19432.1	5
2427	22.017	35.484	89.7	5.91e-19	2	155	95	35484	704	165	fusA	11	154	OLR35495.1	5
2430	22.017	35.484	89.7	5.91e-19	2	155	95	35484	704	165	fusA	11	154	CDN83212.1	5
2451	100	100	677	0	0	331	0	100000	331	331	gapA	1	331	MTT18260.1	1
2452	100	100	677	0	0	331	0	100000	331	331	gapA	1	331	OLR34933.1	1
2453	100	100	677	0	0	331	0	100000	331	331	gapA	1	334	CDN82283.1	4
2454	100.604	46.246	279	2.4e-93	6	333	171	46246	331	331	gapA	4	332	MTT21569.1	3
2455	100.604	46.246	279	2.4e-93	6	333	171	46246	331	331	gapA	4	332	OLR35285.1	3
2456	100.604	46.246	279	2.4e-93	6	333	171	46246	331	331	gapA	4	332	CDN81978.1	3
2457	99.3958	41.945	261	5.31e-86	4	329	185	41945	331	324	gapA	1	328	MTT19952.1	1
2458	99.3958	41.945	261	5.31e-86	4	329	185	41945	331	324	gapA	1	328	OLR35116.1	1
2459	99.3958	41.945	260	2.29e-85	4	329	185	41945	331	324	gapA	1	356	CDN83544.1	29
2467	100	99.775	902	0	0	445	1	99775	445	445	glmM	1	445	MTT21344.1	1
2468	100	99.775	902	0	0	445	1	99775	445	445	glmM	1	445	OLR34771.1	1
2469	100	99.775	902	0	0	445	1	99775	445	445	glmM	1	445	CDN83920.1	1
2470	103.371	26.087	100	3.3e-23	15	460	297	26087	445	433	glmM	1	460	CDN82725.1	17
2471	103.371	26.087	100	3.71e-23	15	460	297	26087	445	433	glmM	1	444	MTT21383.1	1
2472	103.371	26.087	100	3.71e-23	15	460	297	26087	445	433	glmM	1	444	OLR33567.1	1
2482	100	99.836	1243	0	0	609	1	99836	609	609	glmS	1	609	MTT21077.1	1
2483	100	99.836	1243	0	0	609	1	99836	609	609	glmS	1	609	OLR35754.1	1
2484	100	99.836	1243	0	0	609	1	99836	609	609	glmS	1	609	CDN84562.1	1
2485	35.3038	29.767	73.2	5.97e-14	7	215	132	29767	609	197	glmS	1	214	MTT17806.1	1
2486	35.3038	29.767	73.2	5.97e-14	7	215	132	29767	609	197	glmS	1	214	OLR36184.1	1
2487	35.3038	29.767	73.2	5.97e-14	7	215	132	29767	609	197	glmS	1	214	CDN82989.1	1
2509	100	99.781	929	0	0	456	1	99781	456	456	glmU	1	456	MTT21076.1	1
2510	100	99.781	929	0	0	456	1	99781	456	456	glmU	1	456	OLR35753.1	1
2511	100	99.781	929	0	0	456	1	99781	456	456	glmU	1	456	CDN84563.1	1
2570	100	99.639	1158	0	0	554	2	99639	554	554	glnS	1	554	MTT21499.1	1
2571	100	99.639	1158	0	0	554	2	99639	554	554	glnS	1	554	OLR37615.1	1
2572	100	99.639	1158	0	0	554	2	99639	554	554	glnS	1	554	CDN81051.1	1
2573	22.0217	28.689	70.5	2.64e-13	0	122	87	28689	554	149	glnS	28	124	MTT17884.1	3
2574	22.0217	28.689	70.5	2.64e-13	0	122	87	28689	554	149	glnS	28	124	OLR35356.1	3
2575	22.0217	28.689	70.5	2.64e-13	0	122	87	28689	554	149	glnS	28	124	CDN83068.1	3
2585	100	99.575	985	0	0	471	2	99575	471	471	gltX	1	471	MTT17884.1	1
2586	100	99.575	985	0	0	471	2	99575	471	471	gltX	1	471	OLR35356.1	1
2587	100	99.575	985	0	0	471	2	99575	471	471	gltX	1	471	CDN83068.1	1
2588	63.482	33.445	138	9.11e-38	7	299	180	33445	471	300	gltX	6	292	OLR36862.1	9
2589	63.482	33.445	138	1.11e-37	7	299	180	33445	471	300	gltX	6	302	MTT21217.1	19
2590	63.482	33.445	138	1.11e-37	7	299	180	33445	471	300	gltX	6	302	CDN80528.1	19
2591	25.9023	27.869	69.3	6.3e-13	0	122	88	27869	471	124	gltX	3	149	MTT21499.1	28
2592	25.9023	27.869	69.3	6.3e-13	0	122	88	27869	471	124	gltX	3	149	OLR37615.1	28
2593	25.9023	27.869	69.3	6.3e-13	0	122	88	27869	471	124	gltX	3	149	CDN81051.1	28
2607	100	100	861	0	0	417	0	100000	417	417	glyA	1	419	CDN83194.1	3
2608	100	100	861	0	0	417	0	100000	417	417	glyA	1	417	MTT19451.1	1
2609	100	100	861	0	0	417	0	100000	417	417	glyA	1	417	OLR35476.1	1
2626	100	99.67	632	0	0	303	1	99670	303	303	glyQ	1	303	MTT19796.1	1
2627	100	99.67	632	0	0	303	1	99670	303	303	glyQ	1	303	OLR35928.1	1
2628	100	99.67	632	0	0	303	1	99670	303	303	glyQ	1	303	CDN84315.1	1
2637	100	99.565	1399	0	0	689	3	99565	689	689	glyS	1	689	MTT19795.1	1
2638	100	99.565	1399	0	0	689	3	99565	689	689	glyS	1	689	OLR35929.1	1
2639	100	99.565	1399	0	0	689	3	99565	689	689	glyS	1	689	CDN84314.1	1
2644	100	100	428	7.67e-156	0	207	0	100000	207	207	gmk	1	207	MTT19883.1	1
2645	100	100	428	7.67e-156	0	207	0	100000	207	207	gmk	1	207	OLR35841.1	1
2646	100	100	428	8.14e-156	0	207	0	100000	207	207	gmk	1	226	CDN84405.1	20
2715	100	100	694	0	0	339	0	100000	339	339	gpsA	1	339	MTT19845.1	1
2716	100	100	694	0	0	339	0	100000	339	339	gpsA	1	339	OLR35879.1	1
2717	100	100	694	0	0	339	0	100000	339	339	gpsA	1	339	CDN84366.1	1
2760	100	100	1079	0	0	548	0	100000	548	548	groL	1	548	MTT18051.1	1
2761	100	100	1079	0	0	548	0	100000	548	548	groL	1	548	OLR36367.1	1
2762	100	100	1079	0	0	548	0	100000	548	548	groL	1	548	CDN85025.1	1
2766	100	100	188	1.61e-64	0	97	0	100000	97	97	groS	1	97	MTT18050.1	1
2767	100	100	188	1.61e-64	0	97	0	100000	97	97	groS	1	97	OLR36368.1	1
2768	100	100	188	1.61e-64	0	97	0	100000	97	97	groS	1	97	CDN85024.1	1
2781	100	99.492	392	3.34e-142	0	197	1	99492	197	197	grpE	1	197	MTT19732.1	1
2782	100	99.492	392	3.34e-142	0	197	1	99492	197	197	grpE	1	197	OLR31801.1	1
2783	100	99.492	392	3.34e-142	0	197	1	99492	197	197	grpE	1	197	CDN83251.1	1
2788	100	99.81	1082	0	0	525	1	99810	525	525	guaA	1	525	MTT19492.1	1
2789	100	99.81	1082	0	0	525	1	99810	525	525	guaA	1	525	OLR35438.1	1
2790	100	99.81	1082	0	0	525	1	99810	525	525	guaA	1	525	CDN83151.1	1
2791	36.381	26.178	58.5	2.49e-10	2	191	134	26178	525	199	guaA	10	186	MTT19256.1	2
2792	36.381	26.178	58.5	2.49e-10	2	191	134	26178	525	199	guaA	10	186	OLR33689.1	2
2793	36.381	26.178	58.5	2.49e-10	2	191	134	26178	525	199	guaA	10	186	CDN84102.1	2
2817	100	99.657	1765	0	0	875	3	99657	875	875	gyrA	1	875	MTT17729.1	1
2818	100	99.657	1765	0	0	875	3	99657	875	875	gyrA	1	875	OLR36108.1	1
2819	100	99.657	1765	0	0	875	3	99657	875	875	gyrA	1	875	CDN82908.1	1
2820	85.9429	34.84	393	4.49e-125	19	752	409	34840	875	743	gyrA	1	680	MTT20264.1	1
2821	85.9429	34.84	393	4.49e-125	19	752	409	34840	875	743	gyrA	1	680	OLR35628.1	1
2822	85.9429	34.84	393	4.49e-125	19	752	409	34840	875	743	gyrA	1	680	CDN83762.1	1
2833	100	99.876	1665	0	0	804	1	99876	804	804	gyrB	1	804	MTT21108.1	1
2834	100	99.876	1665	0	0	804	1	99876	804	804	gyrB	1	804	OLR35784.1	1
2835	100	99.876	1665	0	0	804	1	99876	804	804	gyrB	1	805	CDN84532.1	2
2836	69.0299	41.261	392	6.14e-127	11	555	308	41261	804	550	gyrB	1	542	MTT20279.1	1
2838	69.0299	41.261	392	6.14e-127	11	555	308	41261	804	550	gyrB	1	542	OLR35646.1	1
2840	69.0299	41.261	392	6.14e-127	11	555	308	41261	804	550	gyrB	1	542	CDN83779.1	1
2852	100	99.571	473	1.8e-172	0	233	1	99571	233	233	hda	1	248	MTT19503.1	16
2853	100	99.571	473	1.8e-172	0	233	1	99571	233	233	hda	1	248	CDN83139.1	16
2854	96.5665	99.556	456	2.28e-166	0	225	1	99556	233	233	hda	9	225	OLR35516.1	1
2855	105.15	26.939	81.3	3.91e-18	7	245	160	26939	233	232	hda	4	364	MTT21105.1	123
2856	105.15	26.939	81.3	3.91e-18	7	245	160	26939	233	232	hda	4	364	OLR35781.1	123
2857	105.15	26.939	81.3	3.91e-18	7	245	160	26939	233	232	hda	4	364	CDN84535.1	123
2876	100	98.565	838	0	0	418	6	98565	418	418	hemA	1	418	MTT20758.1	1
2877	100	98.565	838	0	0	418	6	98565	418	418	hemA	1	418	OLR37297.1	1
2878	100	98.565	838	0	0	418	6	98565	418	418	hemA	1	484	CDN81748.1	67
2892	100	100	667	0	0	324	0	100000	324	324	hemB	1	324	MTT19152.1	1
2893	100	100	667	0	0	324	0	100000	324	324	hemB	1	324	OLR37892.1	1
2894	100	100	667	0	0	324	0	100000	324	324	hemB	1	335	CDN80759.1	12
2906	100	99.361	622	0	0	313	2	99361	313	313	hemC	1	320	CDN84626.1	8
2907	100	99.361	621	0	0	313	2	99361	313	313	hemC	1	313	MTT21012.1	1
2908	100	99.361	621	0	0	313	2	99361	313	313	hemC	1	313	OLR34077.1	1
2926	100	97.154	485	2.95e-177	0	246	7	97154	246	246	hemD	1	246	MTT21013.1	1
2927	100	97.154	485	2.95e-177	0	246	7	97154	246	246	hemD	1	246	OLR34076.1	1
2928	100	97.154	485	2.95e-177	0	246	7	97154	246	246	hemD	1	246	CDN84625.1	1
2944	100	99.718	733	0	0	354	1	99718	354	354	hemE	1	354	MTT21929.1	1
2945	100	99.718	733	0	0	354	1	99718	354	354	hemE	1	354	OLR30011.1	1
2946	100	99.718	733	0	0	354	1	99718	354	354	hemE	1	354	CDN84835.1	1
2956	100	100	382	1.73e-138	0	181	0	100000	181	181	hemG	1	181	MTT20949.1	1
2957	100	100	382	1.73e-138	0	181	0	100000	181	181	hemG	1	181	OLR34139.1	1
2958	100	100	382	1.73e-138	0	181	0	100000	181	181	hemG	1	181	CDN84690.1	1
2959	100	99.063	656	0	0	320	3	99063	320	320	hemH	1	320	MTT19052.1	1
2960	100	99.063	656	0	0	320	3	99063	320	320	hemH	1	320	OLR37792.1	1
2961	100	99.063	656	0	0	320	3	99063	320	320	hemH	1	320	CDN80865.1	1
2966	100	99.061	863	0	0	426	4	99061	426	426	hemL	1	426	MTT21203.1	1
2967	100	99.061	863	0	0	426	4	99061	426	426	hemL	1	426	OLR36805.1	1
2968	100	99.061	863	0	0	426	4	99061	426	426	hemL	1	426	CDN80543.1	1
2969	96.4789	31.144	157	3.8e-44	11	411	246	31144	426	392	hemL	1	393	MTT19722.1	1
2970	96.4789	31.144	157	3.8e-44	11	411	246	31144	426	392	hemL	1	393	OLR31811.1	1
2971	96.7136	31.311	157	4.07e-44	12	412	244	31311	426	392	hemL	1	395	CDN83262.1	3
2972	73.2394	32.692	133	3.06e-35	10	312	183	32692	426	331	hemL	33	319	MTT18291.1	22
2973	73.2394	32.692	133	3.06e-35	10	312	183	32692	426	331	hemL	33	319	OLR34900.1	22
2974	73.2394	32.692	133	3.06e-35	10	312	183	32692	426	331	hemL	33	319	CDN82251.1	22
2975	74.4131	31.861	132	5.01e-35	11	317	185	31861	426	341	hemL	38	328	MTT19255.1	30
2976	74.4131	31.861	132	5.01e-35	11	317	185	31861	426	341	hemL	38	328	OLR33690.1	30
2977	74.4131	31.861	132	5.01e-35	11	317	185	31861	426	341	hemL	38	328	CDN84101.1	30
2978	78.4038	29.341	125	5.5e-32	12	334	212	29341	426	363	hemL	44	399	OLR35728.1	76
2979	78.4038	29.341	125	7.71e-32	12	334	212	29341	426	363	hemL	44	436	MTT20323.1	113
2980	78.4038	29.341	125	7.71e-32	12	334	212	29341	426	363	hemL	44	436	CDN83823.1	113
2981	69.0141	27.211	91.7	1.65e-20	12	294	181	27211	426	303	hemL	36	315	MTT20184.1	29
2982	69.0141	27.211	91.3	1.77e-20	12	294	181	27211	426	303	hemL	36	296	OLR37530.1	10
2983	69.0141	27.211	91.7	1.88e-20	12	294	181	27211	426	303	hemL	36	352	CDN81140.1	66
2990	100	99.275	280	2.03e-99	0	138	1	99275	138	138	higA	1	138	MTT20331.1	1
2991	100	99.275	280	2.03e-99	0	138	1	99275	138	138	higA	1	138	OLR35695.1	1
2992	100	99.275	280	2.03e-99	0	138	1	99275	138	138	higA	1	138	CDN83832.1	1
2993	97.1014	46.269	132	5.99e-41	1	134	71	46269	138	137	higA	5	139	MTT19672.1	6
2994	97.1014	46.269	132	5.99e-41	1	134	71	46269	138	137	higA	5	139	OLR34565.1	6
2995	97.1014	46.269	132	5.99e-41	1	134	71	46269	138	137	higA	5	139	CDN83316.1	6
3011	100	96.591	176	5.62e-60	0	88	3	96591	88	88	hipB	1	88	MTT18479.1	1
3012	100	96.591	176	5.62e-60	0	88	3	96591	88	88	hipB	1	88	OLR34413.1	1
3013	100	96.591	176	8.14e-60	0	88	3	96591	88	88	hipB	1	94	CDN82054.1	7
3047	100	99.764	870	0	0	424	1	99764	424	424	hisS	1	424	MTT19482.1	1
3048	100	99.764	870	0	0	424	1	99764	424	424	hisS	1	424	OLR35446.1	1
3049	100	99.764	870	0	0	424	1	99764	424	424	hisS	1	424	CDN83161.1	1
3059	100	99.417	684	0	0	343	2	99417	343	343	holA	1	343	MTT20713.1	1
3060	100	99.417	684	0	0	343	2	99417	343	343	holA	1	343	OLR37652.1	1
3061	100	99.417	684	0	0	343	2	99417	343	343	holA	1	343	CDN81012.1	1
3072	100	97.605	663	0	0	334	8	97605	334	334	holB	1	334	MTT18760.1	1
3073	100	97.605	663	0	0	334	8	97605	334	334	holB	1	334	OLR37122.1	1
3074	100	97.605	663	0	0	334	8	97605	334	334	holB	1	334	CDN81556.1	1
3075	41.6168	31.655	76.6	8.75e-16	1	139	92	31655	334	159	holB	21	170	MTT19057.1	35
3076	41.6168	31.655	76.6	8.75e-16	1	139	92	31655	334	159	holB	21	170	OLR37797.1	35
3077	41.6168	31.655	76.6	8.75e-16	1	139	92	31655	334	159	holB	21	170	CDN80860.1	35
3091	100	97.08	270	1.25e-95	0	137	4	97080	137	137	holD	1	137	MTT18964.1	1
3092	100	97.08	270	1.25e-95	0	137	4	97080	137	137	holD	1	137	OLR36603.1	1
3093	100	97.08	270	1.25e-95	0	137	4	97080	137	137	holD	1	137	CDN85317.1	1
3117	100	100	1231	0	0	616	0	100000	616	616	hscA	1	634	CDN83173.1	19
3118	100	100	1231	0	0	616	0	100000	616	616	hscA	1	616	MTT19470.1	1
3119	100	100	1231	0	0	616	0	100000	616	616	hscA	1	616	OLR35458.1	1
3120	96.2662	41.99	436	1.95e-146	8	593	320	41990	616	593	hscA	23	596	MTT18919.1	6
3121	96.2662	41.99	436	1.95e-146	8	593	320	41990	616	593	hscA	23	596	OLR36648.1	6
3122	96.2662	41.99	436	1.95e-146	8	593	320	41990	616	593	hscA	23	596	CDN80382.1	6
3123	90.4221	31.957	266	6.97e-82	10	557	326	31957	616	550	hscA	20	535	MTT20721.1	6
3124	90.4221	31.957	266	6.97e-82	10	557	326	31957	616	550	hscA	20	535	OLR37644.1	6
3125	90.4221	31.957	266	6.97e-82	10	557	326	31957	616	550	hscA	20	535	CDN81021.1	6
3138	100	100	199	5.81e-69	0	99	0	100000	99	99	ihfA	1	99	MTT18325.1	1
3139	100	100	199	5.81e-69	0	99	0	100000	99	99	ihfA	1	99	OLR34865.1	1
3140	100	100	199	5.81e-69	0	99	0	100000	99	99	ihfA	1	99	CDN82216.1	1
3141	90.9091	36.667	65.1	9.83e-16	0	90	57	36667	99	92	ihfA	3	90	MTT21926.1	1
3142	90.9091	36.667	65.1	9.83e-16	0	90	57	36667	99	92	ihfA	3	90	OLR30014.1	1
3143	90.9091	36.667	65.1	9.83e-16	0	90	57	36667	99	92	ihfA	3	90	CDN84838.1	1
3144	84.8485	36.905	63.2	4.17e-15	1	84	49	36905	99	91	ihfA	12	89	MTT19086.1	6
3145	84.8485	36.905	63.2	4.17e-15	1	84	49	36905	99	91	ihfA	12	89	OLR37825.1	6
3146	84.8485	36.905	63.2	4.17e-15	1	84	49	36905	99	91	ihfA	12	89	CDN80830.1	6
3147	90.9091	32.222	58.5	3.28e-13	1	90	60	32222	99	91	ihfA	3	90	MTT18596.1	1
3148	90.9091	32.222	58.5	3.28e-13	1	90	60	32222	99	91	ihfA	3	90	OLR36962.1	1
3149	90.9091	32.222	58.5	3.28e-13	1	90	60	32222	99	91	ihfA	3	90	CDN81385.1	1
3155	100	99.254	1934	0	0	938	7	99254	938	938	ileS	1	938	MTT18906.1	1
3156	100	99.254	1934	0	0	938	7	99254	938	938	ileS	1	938	OLR36660.1	1
3157	100	99.254	1934	0	0	938	7	99254	938	938	ileS	1	938	CDN80394.1	1
3158	86.887	21.84	142	4.39e-35	21	815	470	21840	938	775	ileS	46	762	MTT18168.1	30
3159	86.887	21.84	142	4.39e-35	21	815	470	21840	938	775	ileS	46	762	OLR36254.1	30
3160	86.887	21.84	142	4.39e-35	21	815	470	21840	938	775	ileS	46	762	CDN85144.1	30
3161	72.1748	20.384	75.1	4.14e-14	24	677	362	20384	938	629	ileS	58	693	CDN81014.1	89
3162	72.1748	20.384	75.1	4.42e-14	24	677	362	20384	938	629	ileS	58	646	MTT20715.1	42
3163	72.1748	20.384	75.1	4.42e-14	24	677	362	20384	938	629	ileS	58	646	OLR37650.1	42
3188	100	100	149	1.19e-49	0	72	0	100000	72	72	infA	1	72	MTT20076.1	1
3189	100	100	149	1.19e-49	0	72	0	100000	72	72	infA	1	72	OLR37424.1	1
3190	100	100	149	1.19e-49	0	72	0	100000	72	72	infA	1	72	CDN81250.1	1
3194	100	99.888	1793	0	0	890	1	99888	890	890	infB	1	890	MTT21744.1	1
3195	100	99.888	1793	0	0	890	1	99888	890	890	infB	1	890	OLR34777.1	1
3196	100	99.888	1793	0	0	890	1	99888	890	890	infB	1	890	CDN83914.1	1
3197	25.7303	29.258	85.9	1.47e-17	6	229	121	29258	890	595	infB	394	221	MTT19432.1	7
3198	25.7303	29.258	85.9	1.47e-17	6	229	121	29258	890	595	infB	394	221	OLR35495.1	7
3199	25.7303	29.258	85.9	1.47e-17	6	229	121	29258	890	595	infB	394	221	CDN83212.1	7
3200	28.2022	32.669	80.9	5.6e-16	10	251	147	32669	890	630	infB	393	243	MTT19828.1	2
3201	28.2022	32.669	80.9	5.6e-16	10	251	147	32669	890	630	infB	393	243	OLR35896.1	2
3202	28.2022	32.669	80.9	5.6e-16	10	251	147	32669	890	630	infB	393	243	CDN84348.1	2
3203	18.427	31.707	71.2	5.49e-13	2	164	96	31707	890	541	infB	394	171	MTT20613.1	8
3204	18.427	31.707	71.2	5.49e-13	2	164	96	31707	890	541	infB	394	171	OLR34377.1	8
3205	18.427	31.707	71.2	5.49e-13	2	164	96	31707	890	541	infB	394	171	CDN84709.1	8
3206	14.8315	36.364	61.6	2.76e-10	4	132	66	36364	890	501	infB	387	139	CDN84818.1	9
3207	14.8315	36.364	61.6	2.76e-10	4	132	66	36364	890	501	infB	387	139	CDN84080.1	9
3247	100	100	360	9.43e-130	0	180	0	100000	180	180	infC	1	180	MTT18319.1	1
3248	100	100	360	9.43e-130	0	180	0	100000	180	180	infC	1	180	OLR34871.1	1
3249	80	99.306	288	6.9e-102	0	144	1	99306	180	180	infC	37	144	CDN82221.1	1
3260	100	61.682	149	1.48e-48	0	107	41	61682	107	107	iraM	1	107	MTT22459.1	1
3261	100	61.682	149	1.48e-48	0	107	41	61682	107	107	iraM	1	107	CDN82569.1	1
3262	100	61.682	149	1.63e-48	0	107	41	61682	107	107	iraM	1	107	OLR37370.1	1
3263	100	61.682	149	1.63e-48	0	107	41	61682	107	107	iraM	1	107	CDN81826.1	1
3277	100	100	837	0	0	404	0	100000	404	404	iscS	1	412	CDN83178.1	9
3278	100	100	837	0	0	404	0	100000	404	404	iscS	1	404	MTT19466.1	1
3279	100	100	837	0	0	404	0	100000	404	404	iscS	1	404	OLR35462.1	1
3280	55.6931	32	97.4	1.34e-22	6	225	138	32000	404	219	iscS	3	239	MTT18357.1	22
3281	55.6931	32	97.4	1.34e-22	6	225	138	32000	404	219	iscS	3	239	OLR34531.1	22
3282	55.6931	32	97.4	1.34e-22	6	225	138	32000	404	219	iscS	3	239	CDN82182.1	22
3283	53.2178	30.233	91.3	1.56e-20	3	215	146	30233	404	217	iscS	5	245	CDN83415.1	33
3284	53.2178	30.233	90.9	1.67e-20	3	215	146	30233	404	217	iscS	5	233	MTT19578.1	21
3285	53.2178	30.233	90.9	1.67e-20	3	215	146	30233	404	217	iscS	5	233	OLR34656.1	21
3298	100	100	262	7.59e-93	0	128	0	100000	128	128	iscU	1	128	MTT19467.1	1
3299	100	100	262	7.59e-93	0	128	0	100000	128	128	iscU	1	128	OLR35461.1	1
3300	100	100	262	7.59e-93	0	128	0	100000	128	128	iscU	1	128	CDN83177.1	1
3302	100	99.331	599	0	0	299	2	99331	299	299	ispA	1	299	MTT19105.1	1
3303	100	99.331	599	0	0	299	2	99331	299	299	ispA	1	299	OLR37845.1	1
3304	100	99.331	599	0	0	299	2	99331	299	299	ispA	1	299	CDN80810.1	1
3305	84.9498	29.921	94	1.37e-22	7	254	151	29921	299	290	ispA	43	275	MTT21333.1	43
3306	84.9498	29.921	94	1.37e-22	7	254	151	29921	299	290	ispA	43	275	OLR34760.1	43
3307	84.9498	29.921	94	1.37e-22	7	254	151	29921	299	290	ispA	43	275	CDN83931.1	43
3314	100	100	662	0	0	323	0	100000	323	323	ispB	1	323	MTT21333.1	1
3315	100	100	662	0	0	323	0	100000	323	323	ispB	1	323	OLR34760.1	1
3316	100	100	662	0	0	323	0	100000	323	323	ispB	1	323	CDN83931.1	1
3317	78.6378	29.134	79.7	2.12e-17	7	254	153	29134	323	275	ispB	43	290	MTT19105.1	43
3318	78.6378	29.134	79.7	2.12e-17	7	254	153	29134	323	275	ispB	43	290	OLR37845.1	43
3319	78.6378	29.134	79.7	2.12e-17	7	254	153	29134	323	275	ispB	43	290	CDN80810.1	43
3329	100	99.153	481	4.57e-176	0	236	2	99153	236	236	ispD	1	236	MTT19636.1	1
3330	100	99.153	481	4.57e-176	0	236	2	99153	236	236	ispD	1	236	OLR34597.1	1
3331	100	99.153	481	4.57e-176	0	236	2	99153	236	236	ispD	1	236	CDN83352.1	1
3332	95.339	26.222	65.5	9.02e-13	8	225	153	26222	236	224	ispD	10	254	CDN83685.1	33
3353	100	98.94	575	0	0	283	3	98940	283	283	ispE	1	283	MTT20760.1	1
3354	100	98.94	575	0	0	283	3	98940	283	283	ispE	1	283	OLR37296.1	1
3355	100	98.94	575	0	0	283	3	98940	283	283	ispE	1	283	CDN81746.1	1
3366	100	99.371	319	2.65e-114	0	159	1	99371	159	159	ispF	1	159	MTT19637.1	1
3367	100	99.371	319	2.65e-114	0	159	1	99371	159	159	ispF	1	159	OLR34596.1	1
3368	100	99.371	319	2.65e-114	0	159	1	99371	159	159	ispF	1	159	CDN83351.1	1
3375	100	100	753	0	0	372	0	100000	372	372	ispG	1	372	MTT19481.1	1
3376	100	100	753	0	0	372	0	100000	372	372	ispG	1	372	OLR35447.1	1
3377	100	100	753	0	0	372	0	100000	372	372	ispG	1	372	CDN83162.1	1
3396	100	100	645	0	0	316	0	100000	316	316	ispH	1	316	MTT18903.1	1
3397	100	100	645	0	0	316	0	100000	316	316	ispH	1	316	OLR36663.1	1
3398	100	100	645	0	0	316	0	100000	316	316	ispH	1	316	CDN80397.1	1
3407	100	100	525	0	0	253	0	100000	253	253	ispU	1	253	CDN80561.1	1
3408	99.6047	100	523	0	0	252	0	100000	253	253	ispU	2	252	MTT21184.1	1
3409	99.6047	100	523	0	0	252	0	100000	253	253	ispU	2	252	OLR36823.1	1
3413	100	100	580	0	0	284	0	100000	284	284	kdsA	1	284	MTT20753.1	1
3414	100	100	580	0	0	284	0	100000	284	284	kdsA	1	284	OLR37302.1	1
3415	100	100	580	0	0	284	0	100000	284	284	kdsA	1	284	CDN81753.1	1
3422	100	98.79	501	0	0	248	3	98790	248	248	kdsB	1	248	MTT18602.1	1
3423	100	98.79	501	0	0	248	3	98790	248	248	kdsB	1	248	OLR36968.1	1
3424	100	98.79	501	0	0	248	3	98790	248	248	kdsB	1	248	CDN81391.1	1
3425	99.5968	46.154	177	1.28e-55	8	247	113	46154	248	245	kdsB	4	236	MTT21958.1	5
3426	100.403	45.783	176	3.61e-55	8	249	115	45783	248	247	kdsB	4	238	OLR35548.1	5
3427	100.403	45.783	176	4.11e-55	8	249	115	45783	248	247	kdsB	4	238	CDN83681.1	5
3438	100	99.691	669	0	0	324	1	99691	324	324	lepB	1	324	MTT19433.1	1
3439	100	99.691	669	0	0	324	1	99691	324	324	lepB	1	324	OLR35494.1	1
3440	100	99.691	669	0	0	324	1	99691	324	324	lepB	1	324	CDN83211.1	1
3458	100	99.651	1792	0	0	860	3	99651	860	860	leuS	1	907	CDN81014.1	48
3459	100	99.651	1789	0	0	860	3	99651	860	860	leuS	1	860	MTT20715.1	1
3460	100	99.651	1789	0	0	860	3	99651	860	860	leuS	1	860	OLR37650.1	1
3461	46.2791	26.633	116	6.71e-27	9	398	193	26633	860	379	leuS	1	318	MTT18168.1	1
3463	46.2791	26.633	116	6.71e-27	9	398	193	26633	860	379	leuS	1	318	OLR36254.1	1
3465	46.2791	26.633	116	6.71e-27	9	398	193	26633	860	379	leuS	1	318	CDN85144.1	1
3467	78.7209	20.679	73.2	1.52e-13	25	677	360	20679	860	646	leuS	42	629	MTT18906.1	58
3468	78.7209	20.679	73.2	1.52e-13	25	677	360	20679	860	646	leuS	42	629	OLR36660.1	58
3469	78.7209	20.679	73.2	1.52e-13	25	677	360	20679	860	646	leuS	42	629	CDN80394.1	58
3500	100	100	407	6.24e-148	0	202	0	100000	202	202	lexA	1	202	MTT17923.1	1
3501	100	100	407	6.24e-148	0	202	0	100000	202	202	lexA	1	202	OLR36492.1	1
3502	100	100	407	6.24e-148	0	202	0	100000	202	202	lexA	1	202	CDN84889.1	1
3503	57.9208	32.479	65.1	4.68e-14	3	117	76	32479	202	197	lexA	82	136	MTT20813.1	22
3504	57.9208	32.479	65.1	4.68e-14	3	117	76	32479	202	197	lexA	82	136	OLR37241.1	22
3505	57.9208	32.479	65.1	4.68e-14	3	117	76	32479	202	197	lexA	82	136	CDN81683.1	22
3516	100	100	581	0	0	291	0	100000	291	291	lgt	1	291	MTT20030.1	1
3517	100	100	581	0	0	291	0	100000	291	291	lgt	1	291	OLR35042.1	1
3518	100	100	581	0	0	291	0	100000	291	291	lgt	1	291	CDN83466.1	1
3525	100	99.106	1356	0	0	671	6	99106	671	671	ligA	1	671	MTT19566.1	1
3526	100	99.106	1356	0	0	671	6	99106	671	671	ligA	1	671	OLR35365.1	1
3527	100	99.106	1356	0	0	671	6	99106	671	671	ligA	1	671	CDN83076.1	1
3528	77.1982	23.359	102	4.01e-23	14	518	338	23359	671	517	ligA	5	496	CDN84404.1	33
3529	77.1982	23.359	102	4.75e-23	14	518	338	23359	671	517	ligA	5	494	MTT19882.1	31
3530	77.1982	23.359	102	4.75e-23	14	518	338	23359	671	517	ligA	5	494	OLR35842.1	31
3544	100	100	669	0	0	321	0	100000	321	321	lipA	1	321	MTT20702.1	1
3545	100	100	669	0	0	321	0	100000	321	321	lipA	1	321	OLR37663.1	1
3546	100	100	669	0	0	321	0	100000	321	321	lipA	1	321	CDN80999.1	1
3558	100	98.047	1018	0	0	512	10	98047	512	512	lnt	1	512	MTT20728.1	1
3559	100	98.047	1018	0	0	512	10	98047	512	512	lnt	1	512	OLR37637.1	1
3560	100	98.047	1018	0	0	512	10	98047	512	512	lnt	1	512	CDN81028.1	1
3567	100	100	418	4.62e-152	0	203	0	100000	203	203	lolA	1	204	CDN81257.1	2
3568	100	100	418	5.09e-152	0	203	0	100000	203	203	lolA	1	203	MTT20069.1	1
3569	100	100	418	5.09e-152	0	203	0	100000	203	203	lolA	1	203	OLR37418.1	1
3585	100	99.034	423	9.61e-154	0	207	2	99034	207	207	lolB	1	229	CDN81747.1	23
3586	100	99.034	422	1.07e-153	0	207	2	99034	207	207	lolB	1	207	MTT20759.1	1
3587	100	99.034	422	1.07e-153	0	207	2	99034	207	207	lolB	1	207	OLR37401.1	1
3597	100	100	795	0	0	399	0	100000	399	399	lolC	1	399	MTT18777.1	1
3598	100	100	795	0	0	399	0	100000	399	399	lolC	1	399	OLR37137.1	1
3599	100	100	795	0	0	399	0	100000	399	399	lolC	1	399	CDN81574.1	1
3600	104.01	26.747	139	1.08e-37	7	415	281	26747	399	396	lolC	1	411	MTT18779.1	1
3601	104.01	26.747	139	1.08e-37	7	415	281	26747	399	396	lolC	1	411	OLR37139.1	1
3602	103.258	26.699	139	1.69e-37	7	412	279	26699	399	396	lolC	4	409	CDN81576.1	2
3624	100	99.571	472	1.34e-172	0	233	1	99571	233	233	lolD	1	233	MTT18778.1	1
3625	100	99.571	472	1.34e-172	0	233	1	99571	233	233	lolD	1	233	OLR37138.1	1
3626	100	99.571	472	1.34e-172	0	233	1	99571	233	233	lolD	1	233	CDN81575.1	1
3627	95.279	45.045	187	3.41e-60	0	222	122	45045	233	226	lolD	5	227	MTT19029.1	6
3628	95.279	45.045	187	3.41e-60	0	222	122	45045	233	226	lolD	5	227	OLR37770.1	6
3629	95.279	45.045	187	3.41e-60	0	222	122	45045	233	226	lolD	5	227	CDN80889.1	6
3630	94.4206	42.727	181	1.08e-53	1	220	125	42727	233	224	lolD	5	222	MTT20080.1	4
3631	94.4206	42.727	181	1.08e-53	1	220	125	42727	233	224	lolD	5	222	OLR37428.1	4
3632	94.4206	42.727	181	1.08e-53	1	220	125	42727	233	224	lolD	5	222	CDN81246.1	4
3633	96.1373	40.179	163	9.49e-51	4	224	126	40179	233	226	lolD	3	223	MTT22225.1	8
3634	96.1373	40.179	163	9.49e-51	4	224	126	40179	233	226	lolD	3	223	OLR29021.1	8
3635	96.1373	40.179	163	9.49e-51	4	224	126	40179	233	226	lolD	3	223	CDN85442.1	8
3636	94.4206	42.727	163	1.32e-50	4	220	120	42727	233	223	lolD	5	215	MTT19352.1	1
3637	94.4206	42.727	163	1.32e-50	4	220	120	42727	233	223	lolD	5	215	OLR32872.1	1
3638	94.4206	42.727	163	1.32e-50	4	220	120	42727	233	223	lolD	5	215	CDN84202.1	1
3639	89.2704	39.423	159	7.78e-48	1	208	125	39423	233	212	lolD	5	207	MTT21158.1	1
3640	89.2704	39.423	159	7.78e-48	1	208	125	39423	233	212	lolD	5	207	OLR36849.1	1
3641	89.2704	39.423	159	7.78e-48	1	208	125	39423	233	212	lolD	5	207	CDN80591.1	1
3642	96.1373	37.946	146	6.92e-44	5	224	130	37946	233	226	lolD	5	217	MTT20150.1	1
3643	96.1373	37.946	146	6.92e-44	5	224	130	37946	233	226	lolD	5	217	OLR37496.1	1
3644	96.1373	37.946	146	6.92e-44	5	224	130	37946	233	226	lolD	5	217	CDN81176.1	1
3645	86.6953	38.119	136	8.3e-39	2	202	118	38119	233	223	lolD	23	226	MTT18787.1	31
3646	86.6953	38.119	136	8.3e-39	2	202	118	38119	233	223	lolD	23	226	OLR37147.1	31
3647	86.6953	38.119	136	8.3e-39	2	202	118	38119	233	223	lolD	23	226	CDN81584.1	31
3648	101.288	38.136	133	1.88e-38	5	236	136	38136	233	231	lolD	5	237	MTT19369.1	3
3649	101.288	38.136	133	1.88e-38	5	236	136	38136	233	231	lolD	5	237	OLR32855.1	3
3650	101.288	38.136	133	1.88e-38	5	236	136	38136	233	231	lolD	5	237	CDN84219.1	3
3651	84.5494	36.548	130	1.79e-36	3	197	115	36548	233	213	lolD	21	204	MTT19556.1	14
3652	84.5494	36.548	130	1.79e-36	3	197	115	36548	233	213	lolD	21	204	OLR35375.1	14
3653	84.5494	36.548	130	1.79e-36	3	197	115	36548	233	213	lolD	21	204	CDN83086.1	14
3654	90.1288	37.143	128	1.48e-35	5	210	120	37143	233	213	lolD	5	217	MTT20104.1	19
3655	90.1288	37.143	128	1.48e-35	5	210	120	37143	233	213	lolD	5	217	OLR37451.1	19
3656	98.2833	34.498	125	1.65e-35	7	229	135	34498	233	226	lolD	6	225	MTT20465.1	4
3657	98.2833	34.498	125	1.65e-35	7	229	135	34498	233	226	lolD	6	225	OLR34220.1	4
3658	98.2833	34.498	125	1.65e-35	7	229	135	34498	233	226	lolD	6	225	CDN82478.1	4
3659	90.1288	37.143	127	4.86e-35	5	210	120	37143	233	213	lolD	5	244	CDN81221.1	46
3660	96.5665	36	120	8.16e-34	4	225	124	36000	233	229	lolD	6	217	MTT18617.1	12
3661	96.5665	36	120	8.16e-34	4	225	124	36000	233	229	lolD	6	217	OLR36983.1	12
3662	96.5665	36	120	8.16e-34	4	225	124	36000	233	229	lolD	6	217	CDN81406.1	12
3663	95.279	36.486	122	1.32e-33	6	222	124	36486	233	223	lolD	6	213	MTT21550.1	5
3664	95.279	36.486	122	1.32e-33	6	222	124	36486	233	223	lolD	6	213	OLR35306.1	5
3665	95.279	36.486	122	1.32e-33	6	222	124	36486	233	223	lolD	6	213	CDN81999.1	5
3666	86.2661	35.323	121	5.14e-33	1	201	129	35323	233	224	lolD	25	244	MTT19707.1	44
3667	86.2661	35.323	121	5.14e-33	1	201	129	35323	233	224	lolD	25	244	OLR31826.1	44
3668	86.2661	35.323	121	5.14e-33	1	201	129	35323	233	224	lolD	25	244	CDN83277.1	44
3669	95.279	32.883	118	7.54e-32	2	222	139	32883	233	227	lolD	6	215	MTT17916.1	4
3670	95.279	32.883	118	7.54e-32	2	222	139	32883	233	227	lolD	6	215	OLR36498.1	4
3671	95.279	32.883	118	1.35e-31	2	222	139	32883	233	227	lolD	6	245	CDN84880.1	34
3672	93.133	32.258	116	2.66e-31	3	217	137	32258	233	221	lolD	5	207	OLR29449.1	1
3673	93.133	32.258	116	3.08e-31	3	217	137	32258	233	221	lolD	5	207	MTT22121.1	1
3674	84.1202	35.714	116	3.84e-31	2	196	116	35714	233	212	lolD	21	218	CDN84185.1	29
3675	84.1202	35.714	115	4.31e-31	2	196	116	35714	233	212	lolD	21	205	MTT19337.1	16
3676	84.1202	35.714	115	4.31e-31	2	196	116	35714	233	212	lolD	21	205	OLR32886.1	16
3677	96.1373	33.482	110	3.27e-30	6	224	140	33482	233	226	lolD	5	217	MTT20723.1	1
3678	96.1373	33.482	110	3.27e-30	6	224	140	33482	233	226	lolD	5	217	OLR37642.1	1
3679	96.1373	33.482	110	3.27e-30	6	224	140	33482	233	226	lolD	5	217	CDN81023.1	1
3680	100	35.193	111	3.5e-30	7	233	134	35193	233	224	lolD	1	225	MTT17999.1	1
3681	100	35.193	111	3.5e-30	7	233	134	35193	233	224	lolD	1	225	OLR36417.1	1
3682	100	35.193	111	4.64e-30	7	233	134	35193	233	224	lolD	1	235	CDN84968.1	11
3683	84.1202	35.714	112	6.42e-30	4	196	121	35714	233	216	lolD	25	232	MTT19778.1	38
3684	84.1202	35.714	112	6.42e-30	4	196	121	35714	233	216	lolD	25	232	OLR35948.1	38
3685	84.1202	35.714	112	6.42e-30	4	196	121	35714	233	216	lolD	25	232	CDN84296.1	38
3686	100.858	33.191	110	1.11e-29	6	235	138	33191	233	223	lolD	3	231	MTT18007.1	2
3687	100.858	33.191	110	1.11e-29	6	235	138	33191	233	223	lolD	3	231	OLR36409.1	2
3688	100.858	33.191	110	1.11e-29	6	235	138	33191	233	223	lolD	3	231	CDN84976.1	2
3689	97.8541	30.702	109	1.21e-29	5	228	143	30702	233	220	lolD	1	221	MTT21251.1	1
3690	97.8541	30.702	109	1.21e-29	5	228	143	30702	233	220	lolD	1	221	OLR34682.1	1
3691	97.8541	30.702	109	1.21e-29	5	228	143	30702	233	220	lolD	1	221	CDN84016.1	1
3692	95.7082	34.978	114	1.57e-29	5	223	133	34978	233	216	lolD	5	534	MTT20130.1	313
3693	100.429	30.342	83.6	6.97e-19	6	234	146	30342	233	221	lolD	5	245	MTT20130.1	12
3694	95.7082	34.978	114	1.57e-29	5	223	133	34978	233	216	lolD	5	534	OLR37476.1	313
3695	100.429	30.342	83.6	6.97e-19	6	234	146	30342	233	221	lolD	5	245	OLR37476.1	12
3696	95.7082	34.978	114	1.57e-29	5	223	133	34978	233	216	lolD	5	534	CDN81195.1	313
3697	100.429	30.342	83.6	6.97e-19	6	234	146	30342	233	221	lolD	5	245	CDN81195.1	12
3698	84.5494	34.01	110	1.9e-29	3	197	125	34010	233	220	lolD	25	209	MTT17631.1	17
3699	84.5494	34.01	110	1.9e-29	3	197	125	34010	233	220	lolD	25	209	OLR36006.1	17
3700	84.5494	34.01	110	1.9e-29	3	197	125	34010	233	220	lolD	25	209	CDN82807.1	17
3701	97.8541	37.719	108	2.84e-29	9	228	124	37719	233	226	lolD	6	219	MTT22255.1	3
3702	97.8541	37.719	108	2.84e-29	9	228	124	37719	233	226	lolD	6	219	OLR29160.1	3
3703	97.8541	37.719	108	2.84e-29	9	228	124	37719	233	226	lolD	6	219	CDN85185.1	3
3704	91.8455	32.71	108	3.09e-29	5	214	127	32710	233	221	lolD	15	223	CDN83549.1	20
3705	91.8455	32.71	107	3.23e-29	5	214	127	32710	233	221	lolD	15	212	MTT19947.1	9
3706	91.8455	32.71	107	3.23e-29	5	214	127	32710	233	221	lolD	15	212	OLR35121.1	9
3707	90.1288	35.238	112	5.44e-29	4	210	128	35238	233	230	lolD	25	228	MTT20393.1	23
3709	90.1288	35.238	112	5.44e-29	4	210	128	35238	233	230	lolD	25	228	OLR34149.1	23
3711	96.9957	31.416	108	6.01e-29	7	226	140	31416	233	216	lolD	1	221	MTT20890.1	1
3712	96.9957	31.416	108	6.01e-29	7	226	140	31416	233	216	lolD	1	221	OLR35219.1	1
3713	96.9957	31.416	108	6.01e-29	7	226	140	31416	233	216	lolD	1	221	CDN81909.1	1
3714	90.1288	35.238	112	6.52e-29	4	210	128	35238	233	230	lolD	25	243	CDN82403.1	38
3716	94.4206	32.727	107	6.94e-29	5	220	139	32727	233	216	lolD	5	219	MTT17998.1	1
3717	94.4206	32.727	107	6.94e-29	5	220	139	32727	233	216	lolD	5	219	OLR36418.1	1
3718	94.4206	32.727	107	6.94e-29	5	220	139	32727	233	216	lolD	5	219	CDN84967.1	1
3719	91.4163	33.333	111	1.1e-28	7	213	126	33333	233	226	lolD	24	507	MTT17682.1	301
3720	100.858	34.468	102	1.67e-25	7	235	140	34468	233	222	lolD	1	234	MTT17682.1	1
3721	91.4163	33.333	111	1.1e-28	7	213	126	33333	233	226	lolD	24	507	OLR36057.1	301
3722	100.858	34.468	102	1.67e-25	7	235	140	34468	233	222	lolD	1	234	OLR36057.1	1
3723	91.4163	33.333	111	1.1e-28	7	213	126	33333	233	226	lolD	24	507	CDN82859.1	301
3724	100.858	34.468	102	1.67e-25	7	235	140	34468	233	222	lolD	1	234	CDN82859.1	1
3725	87.9828	36.098	106	1.18e-28	6	205	119	36098	233	205	lolD	2	197	MTT19034.1	4
3726	87.9828	36.098	106	1.18e-28	6	205	119	36098	233	205	lolD	2	197	OLR37773.1	4
3727	87.9828	36.098	106	1.18e-28	6	205	119	36098	233	205	lolD	2	197	CDN80884.1	4
3728	96.1373	36.161	106	2.27e-28	6	224	127	36161	233	213	lolD	1	219	MTT17800.1	1
3729	96.1373	36.161	106	2.27e-28	6	224	127	36161	233	213	lolD	1	219	OLR36178.1	1
3730	96.1373	36.161	106	2.27e-28	6	224	127	36161	233	213	lolD	1	219	CDN82983.1	1
3731	86.6953	32.178	108	3.41e-28	2	202	130	32178	233	221	lolD	21	211	MTT20911.1	16
3732	86.6953	32.178	108	3.41e-28	2	202	130	32178	233	221	lolD	21	211	OLR35239.1	16
3733	86.6953	32.178	108	3.41e-28	2	202	130	32178	233	221	lolD	21	211	CDN81930.1	16
3734	82.4034	34.375	103	2.52e-27	1	192	117	34375	233	216	lolD	25	199	MTT19155.1	17
3735	82.4034	34.375	103	2.52e-27	1	192	117	34375	233	216	lolD	25	199	OLR37895.1	17
3736	82.4034	34.375	103	2.52e-27	1	192	117	34375	233	216	lolD	25	199	CDN80756.1	17
3737	90.1288	33.81	103	5.23e-27	4	210	126	33810	233	226	lolD	24	225	MTT20664.1	22
3738	90.1288	33.81	103	5.23e-27	4	210	126	33810	233	226	lolD	24	225	OLR37701.1	22
3739	90.1288	33.81	103	5.23e-27	4	210	126	33810	233	226	lolD	24	225	CDN80961.1	22
3740	88.412	30.583	102	5.73e-27	4	206	138	30583	233	226	lolD	25	222	MTT20095.1	18
3741	88.412	30.583	102	5.73e-27	4	206	138	30583	233	226	lolD	25	222	OLR37442.1	18
3742	88.412	30.583	102	1.21e-26	4	206	138	30583	233	226	lolD	25	255	CDN81230.1	51
3743	78.97	36.413	102	1.36e-26	2	184	115	36413	233	206	lolD	24	205	MTT21325.1	23
3744	78.97	36.413	102	1.36e-26	2	184	115	36413	233	206	lolD	24	205	OLR34754.1	23
3745	78.97	36.413	102	1.36e-26	2	184	115	36413	233	206	lolD	24	205	CDN83939.1	23
3746	96.5665	33.778	102	2.3e-26	7	225	133	33778	233	216	lolD	5	224	MTT19779.1	3
3747	96.5665	33.778	102	2.3e-26	7	225	133	33778	233	216	lolD	5	224	OLR35947.1	3
3748	96.5665	33.778	102	2.3e-26	7	225	133	33778	233	216	lolD	5	224	CDN84297.1	3
3749	98.2833	30.568	100	1.61e-25	5	229	144	30568	233	218	lolD	5	231	MTT20891.1	3
3750	98.2833	30.568	100	1.61e-25	5	229	144	30568	233	218	lolD	5	231	OLR35220.1	3
3751	98.2833	30.568	100	1.61e-25	5	229	144	30568	233	218	lolD	5	231	CDN81910.1	3
3752	87.9828	32.195	102	2.26e-25	4	205	127	32195	233	221	lolD	25	221	MTT17989.1	21
3753	96.9957	28.319	80.5	6.63e-18	9	226	128	28319	233	228	lolD	25	492	MTT17989.1	279
3754	87.9828	32.195	102	2.26e-25	4	205	127	32195	233	221	lolD	25	221	OLR36426.1	21
3755	96.9957	28.319	80.5	6.63e-18	9	226	128	28319	233	228	lolD	25	492	OLR36426.1	279
3756	87.9828	32.195	102	2.26e-25	4	205	127	32195	233	221	lolD	25	221	CDN84958.1	21
3757	96.9957	28.319	80.5	6.63e-18	9	226	128	28319	233	228	lolD	25	492	CDN84958.1	279
3758	84.5494	37.563	97.4	4.3e-25	3	197	119	37563	233	223	lolD	29	217	MTT17975.1	23
3759	84.5494	37.563	97.4	4.3e-25	3	197	119	37563	233	223	lolD	29	217	OLR36441.1	23
3760	84.5494	37.563	97.4	4.3e-25	3	197	119	37563	233	223	lolD	29	217	CDN84943.1	23
3761	85.4077	32.161	97.4	4.34e-25	2	199	128	32161	233	226	lolD	29	211	MTT18860.1	19
3762	85.4077	32.161	97.4	4.34e-25	2	199	128	32161	233	226	lolD	29	211	OLR36707.1	19
3763	85.4077	32.161	97.1	5.64e-25	2	199	128	32161	233	226	lolD	29	218	CDN80442.1	26
3764	89.2704	36.538	97.8	1.85e-24	5	208	122	36538	233	222	lolD	25	246	MTT22073.1	39
3765	89.2704	36.538	97.8	1.85e-24	5	208	122	36538	233	222	lolD	25	246	OLR37335.1	39
3766	89.2704	36.538	97.8	1.85e-24	5	208	122	36538	233	222	lolD	25	246	CDN81791.1	39
3767	81.9742	34.031	97.1	3.16e-24	4	191	120	34031	233	213	lolD	28	232	MTT22072.1	43
3768	81.9742	34.031	97.1	3.16e-24	4	191	120	34031	233	213	lolD	28	232	OLR37336.1	43
3769	81.9742	34.031	97.1	3.16e-24	4	191	120	34031	233	213	lolD	28	232	CDN81792.1	43
3770	93.9914	31.05	94.4	5.59e-24	6	219	130	31050	233	211	lolD	1	206	MTT19341.1	1
3771	100.858	35.319	95.5	5.68e-24	9	235	130	35319	233	227	lolD	6	231	MTT17976.1	6
3772	100.858	35.319	95.5	5.68e-24	9	235	130	35319	233	227	lolD	6	231	OLR36440.1	6
3773	93.9914	31.05	94.4	7.94e-24	6	219	130	31050	233	211	lolD	1	210	CDN84190.1	5
3774	100.858	35.319	95.5	8.3e-24	9	235	130	35319	233	227	lolD	6	251	CDN84944.1	26
3775	81.9742	32.984	94	1.29e-23	4	191	119	32984	233	204	lolD	18	197	MTT20797.1	12
3776	81.9742	32.984	94	1.29e-23	4	191	119	32984	233	204	lolD	18	197	OLR37257.1	12
3777	81.9742	32.984	94	1.29e-23	4	191	119	32984	233	204	lolD	18	197	CDN81699.1	12
3778	89.6996	32.057	92	7.34e-23	5	209	131	32057	233	226	lolD	24	229	MTT21206.1	26
3779	89.6996	32.057	92	7.34e-23	5	209	131	32057	233	226	lolD	24	229	OLR36802.1	26
3780	89.6996	32.057	92	7.34e-23	5	209	131	32057	233	226	lolD	24	229	CDN80540.1	26
3781	86.2661	31.343	94	1.52e-22	4	201	130	31343	233	221	lolD	25	221	MTT18141.1	25
3782	91.4163	27.23	65.5	8.73e-13	8	213	135	27230	233	229	lolD	30	486	MTT18141.1	281
3783	86.2661	31.343	94	1.52e-22	4	201	130	31343	233	221	lolD	25	221	OLR36280.1	25
3784	91.4163	27.23	65.5	8.73e-13	8	213	135	27230	233	229	lolD	30	486	OLR36280.1	281
3785	86.2661	31.343	94	1.52e-22	4	201	130	31343	233	221	lolD	25	221	CDN85114.1	25
3786	91.4163	27.23	65.5	8.73e-13	8	213	135	27230	233	229	lolD	30	486	CDN85114.1	281
3787	82.4034	31.771	90.9	1.92e-22	3	192	105	31771	233	209	lolD	21	184	MTT18182.1	16
3788	82.4034	31.771	90.9	1.92e-22	3	192	105	31771	233	209	lolD	21	184	OLR35010.1	16
3789	82.4034	31.771	90.9	1.92e-22	3	192	105	31771	233	209	lolD	21	184	CDN82362.1	16
3790	100.858	28.085	93.2	2.59e-22	8	235	153	28085	233	232	lolD	4	240	MTT20651.1	16
3791	93.133	29.954	76.6	1.64e-16	7	217	133	29954	233	227	lolD	25	496	MTT20651.1	285
3792	100.858	28.085	93.2	2.59e-22	8	235	153	28085	233	232	lolD	4	240	OLR37714.1	16
3793	93.133	29.954	76.6	1.64e-16	7	217	133	29954	233	227	lolD	25	496	OLR37714.1	285
3794	100.858	28.085	93.2	2.59e-22	8	235	153	28085	233	232	lolD	4	240	CDN80947.1	16
3795	93.133	29.954	76.6	1.64e-16	7	217	133	29954	233	227	lolD	25	496	CDN80947.1	285
3796	95.7082	27.803	92.8	4.49e-22	3	223	152	27803	233	225	lolD	3	487	MTT19379.1	274
3797	90.1288	27.143	68.9	6.97e-14	5	210	143	27143	233	225	lolD	21	228	MTT19379.1	24
3798	95.7082	27.803	92.8	4.49e-22	3	223	152	27803	233	225	lolD	3	487	OLR32845.1	274
3799	90.1288	27.143	68.9	6.97e-14	5	210	143	27143	233	225	lolD	21	228	OLR32845.1	24
3800	95.7082	27.803	92.8	4.62e-22	3	223	152	27803	233	225	lolD	3	486	CDN84230.1	273
3801	90.1288	27.143	68.9	6.91e-14	5	210	143	27143	233	225	lolD	21	227	CDN84230.1	23
3802	92.2747	30.698	89	7.01e-22	6	215	128	30698	233	211	lolD	5	202	OLR32900.1	1
3803	89.6996	33.493	89.4	8.08e-22	5	209	120	33493	233	225	lolD	27	218	MTT19402.1	19
3804	89.6996	33.493	89.4	8.08e-22	5	209	120	33493	233	225	lolD	27	218	OLR32822.1	19
3805	95.7082	31.39	91.7	9.42e-22	7	223	140	31390	233	229	lolD	13	233	MTT19455.1	18
3806	83.691	23.59	62.8	8.11e-12	6	195	130	23590	233	207	lolD	25	465	MTT19455.1	278
3807	95.7082	31.39	91.7	9.42e-22	7	223	140	31390	233	229	lolD	13	233	OLR35472.1	18
3808	83.691	23.59	62.8	8.11e-12	6	195	130	23590	233	207	lolD	25	465	OLR35472.1	278
3809	95.7082	31.39	91.7	9.42e-22	7	223	140	31390	233	229	lolD	13	233	CDN83190.1	18
3810	83.691	23.59	62.8	8.11e-12	6	195	130	23590	233	207	lolD	25	465	CDN83190.1	278
3811	89.6996	33.493	89	1.07e-21	5	209	120	33493	233	225	lolD	27	228	CDN84257.1	29
3812	99.1416	34.199	91.3	1.4e-21	8	231	128	34199	233	223	lolD	2	550	MTT20074.1	335
3813	99.1416	34.199	91.3	1.4e-21	8	231	128	34199	233	223	lolD	2	550	OLR37422.1	335
3814	99.1416	34.199	91.3	1.4e-21	8	231	128	34199	233	223	lolD	2	550	CDN81252.1	335
3815	100	26.18	88.6	1.54e-21	6	233	146	26180	233	216	lolD	1	224	MTT19342.1	1
3816	100	26.18	88.6	1.54e-21	6	233	146	26180	233	216	lolD	1	224	OLR32881.1	1
3817	100	26.18	88.6	1.54e-21	6	233	146	26180	233	216	lolD	1	224	CDN84191.1	1
3818	88.412	33.01	88.6	1.83e-21	6	206	124	33010	233	209	lolD	9	209	MTT20277.1	13
3819	88.412	33.01	88.6	1.83e-21	6	206	124	33010	233	209	lolD	9	209	OLR35643.1	13
3820	88.412	33.01	88.6	1.83e-21	6	206	124	33010	233	209	lolD	9	209	CDN83777.1	13
3821	86.2661	31.841	87	2.79e-21	4	201	127	31841	233	218	lolD	21	217	CDN82260.1	24
3822	86.2661	31.841	87	2.91e-21	4	201	127	31841	233	218	lolD	21	206	MTT18283.1	13
3823	86.2661	31.841	87	2.91e-21	4	201	127	31841	233	218	lolD	21	206	OLR34908.1	13
3824	81.9742	34.555	87.8	3.98e-21	5	191	105	34555	233	206	lolD	25	201	CDN81652.1	22
3825	81.9742	34.555	87.4	4.3e-21	5	191	105	34555	233	206	lolD	25	202	MTT20840.1	23
3826	81.9742	34.555	87.4	4.3e-21	5	191	105	34555	233	206	lolD	25	202	OLR37213.1	23
3827	91.4163	31.925	87	1.15e-20	4	213	136	31925	233	216	lolD	4	206	MTT21235.1	3
3828	91.4163	31.925	87	1.15e-20	4	213	136	31925	233	216	lolD	4	206	OLR36774.1	3
3829	91.4163	31.925	87	1.15e-20	4	213	136	31925	233	216	lolD	4	206	CDN80510.1	3
3830	93.5622	29.358	88.2	1.57e-20	5	218	141	29358	233	221	lolD	5	216	MTT22156.1	11
3831	86.2661	27.363	65.1	1.1e-12	6	201	127	27363	233	216	lolD	27	473	MTT22156.1	281
3832	96.9957	28.319	84.3	3.6e-19	5	226	148	28319	233	226	lolD	6	560	MTT21686.1	344
3833	96.9957	28.319	84.3	3.6e-19	5	226	148	28319	233	226	lolD	6	560	OLR32759.1	344
3834	96.9957	28.319	84.3	3.6e-19	5	226	148	28319	233	226	lolD	6	560	CDN82598.1	344
3835	86.6953	32.673	81.6	4.4e-19	7	202	113	32673	233	213	lolD	24	208	MTT19368.1	18
3836	86.6953	32.673	81.6	4.4e-19	7	202	113	32673	233	213	lolD	24	208	OLR32856.1	18
3837	86.6953	32.673	81.6	4.4e-19	7	202	113	32673	233	213	lolD	24	208	CDN84218.1	18
3838	87.1245	30.049	81.3	5.9e-19	4	203	133	30049	233	207	lolD	6	198	MTT21319.1	4
3839	87.1245	30.049	81.3	5.9e-19	4	203	133	30049	233	207	lolD	6	198	OLR34748.1	4
3840	87.1245	30.049	81.3	5.9e-19	4	203	133	30049	233	207	lolD	6	198	CDN83945.1	4
3841	88.8412	27.536	83.6	6.52e-19	4	207	141	27536	233	226	lolD	25	222	MTT21057.1	20
3842	106.438	27.016	71.2	1.12e-14	9	248	133	27016	233	228	lolD	4	478	MTT21057.1	256
3843	88.8412	27.536	83.6	6.52e-19	4	207	141	27536	233	226	lolD	25	222	OLR35736.1	20
3844	106.438	27.016	71.2	1.12e-14	9	248	133	27016	233	228	lolD	4	478	OLR35736.1	256
3845	88.8412	27.536	83.6	6.52e-19	4	207	141	27536	233	226	lolD	25	222	CDN84582.1	20
3846	106.438	27.016	71.2	1.12e-14	9	248	133	27016	233	228	lolD	4	478	CDN84582.1	256
3847	96.1373	29.464	82.8	1.11e-18	7	224	144	29464	233	222	lolD	5	219	MTT19804.1	4
3848	95.279	26.126	62.8	6.56e-12	8	222	134	26126	233	227	lolD	25	487	MTT19804.1	277
3849	96.1373	29.464	82.8	1.11e-18	7	224	144	29464	233	222	lolD	5	219	OLR35920.1	4
3850	95.279	26.126	62.8	6.56e-12	8	222	134	26126	233	227	lolD	25	487	OLR35920.1	277
3851	96.1373	29.464	82.8	1.11e-18	7	224	144	29464	233	222	lolD	5	219	CDN84323.1	4
3852	95.279	26.126	62.8	6.56e-12	8	222	134	26126	233	227	lolD	25	487	CDN84323.1	277
3853	95.7082	27.354	80.5	6.64e-18	4	223	152	27354	233	225	lolD	3	544	CDN81160.1	332
3854	95.7082	26.457	65.5	1.01e-12	3	223	156	26457	233	223	lolD	1	220	CDN81160.1	6
3855	95.7082	27.354	80.5	7.85e-18	4	223	152	27354	233	225	lolD	3	539	MTT20164.1	327
3856	95.7082	26.457	65.1	1.14e-12	3	223	156	26457	233	223	lolD	1	215	MTT20164.1	1
3857	95.7082	27.354	80.5	7.85e-18	4	223	152	27354	233	225	lolD	3	539	OLR37510.1	327
3858	95.7082	26.457	65.1	1.14e-12	3	223	156	26457	233	223	lolD	1	215	OLR37510.1	1
3859	85.4077	28.141	78.2	9.88e-18	6	199	128	28141	233	213	lolD	25	219	MTT21081.1	26
3860	85.4077	28.141	78.2	9.88e-18	6	199	128	28141	233	213	lolD	25	219	OLR35758.1	26
3861	85.4077	28.141	78.2	9.88e-18	6	199	128	28141	233	213	lolD	25	219	CDN84558.1	26
3862	90.1288	29.524	79.3	1.69e-17	5	210	134	29524	233	223	lolD	21	548	MTT19078.1	346
3863	90.1288	29.524	79.3	1.69e-17	5	210	134	29524	233	223	lolD	21	548	OLR37817.1	346
3864	90.1288	29.524	79.3	1.69e-17	5	210	134	29524	233	223	lolD	21	548	CDN80838.1	346
3865	89.6996	31.1	77.8	5.8e-17	7	209	122	31100	233	206	lolD	6	535	MTT19077.1	341
3866	89.6996	31.1	77.8	5.8e-17	7	209	122	31100	233	206	lolD	6	535	OLR37816.1	341
3867	89.6996	31.1	77.8	5.8e-17	7	209	122	31100	233	206	lolD	6	535	CDN80839.1	341
3868	95.279	26.577	77.8	5.89e-17	4	222	144	26577	233	224	lolD	6	528	MTT17710.1	323
3869	95.279	26.577	77.8	5.89e-17	4	222	144	26577	233	224	lolD	6	528	OLR36088.1	323
3870	95.279	26.577	77.8	5.89e-17	4	222	144	26577	233	224	lolD	6	528	CDN82889.1	323
3871	87.9828	30.732	75.9	3.23e-16	6	205	125	30732	233	221	lolD	25	554	MTT18598.1	359
3872	87.9828	30.732	75.9	3.23e-16	6	205	125	30732	233	221	lolD	25	554	OLR36964.1	359
3873	87.9828	30.732	75.9	3.23e-16	6	205	125	30732	233	221	lolD	25	554	CDN81387.1	359
3874	98.2833	25.764	75.1	4.4e-16	6	229	158	25764	233	225	lolD	1	221	MTT21270.1	1
3876	98.2833	25.764	75.1	4.4e-16	6	229	158	25764	233	225	lolD	1	221	OLR34701.1	1
3878	98.2833	25.764	75.1	4.4e-16	6	229	158	25764	233	225	lolD	1	221	CDN83997.1	1
3880	93.9914	26.484	72.4	4.59e-15	5	219	101	26484	233	205	lolD	24	211	MTT20138.1	16
3881	95.279	26.577	60.8	3.05e-11	8	222	131	26577	233	223	lolD	6	513	MTT20138.1	320
3882	93.9914	26.484	72.4	4.59e-15	5	219	101	26484	233	205	lolD	24	211	OLR37484.1	16
3883	95.279	26.577	60.8	3.05e-11	8	222	131	26577	233	223	lolD	6	513	OLR37484.1	320
3884	93.9914	26.484	72.4	4.59e-15	5	219	101	26484	233	205	lolD	24	211	CDN81187.1	16
3885	95.279	26.577	60.8	3.05e-11	8	222	131	26577	233	223	lolD	6	513	CDN81187.1	320
3886	90.9871	28.774	69.7	5.43e-15	3	212	135	28774	233	222	lolD	11	205	CDN82878.1	10
3887	90.9871	28.774	69.7	5.58e-15	3	212	135	28774	233	222	lolD	11	203	MTT17699.1	8
3888	90.9871	28.774	69.7	5.58e-15	3	212	135	28774	233	222	lolD	11	203	OLR36077.1	8
3889	89.2704	30.288	72	6.1e-15	7	208	125	30288	233	223	lolD	25	556	MTT21685.1	360
3890	89.2704	30.288	71.6	6.77e-15	7	208	125	30288	233	223	lolD	25	526	OLR32760.1	330
3891	89.2704	30.288	71.6	6.77e-15	7	208	125	30288	233	223	lolD	25	526	CDN82599.1	330
3892	91.8455	29.439	69.7	3.11e-14	7	214	124	29439	233	216	lolD	5	511	MTT18944.1	323
3893	111.588	28.462	66.6	4.25e-13	10	260	111	28462	233	228	lolD	24	260	MTT18944.1	21
3894	91.8455	29.439	69.7	3.11e-14	7	214	124	29439	233	216	lolD	5	511	OLR36624.1	323
3895	111.588	28.462	66.6	4.25e-13	10	260	111	28462	233	228	lolD	24	260	OLR36624.1	21
3896	91.8455	29.439	69.7	3.11e-14	7	214	124	29439	233	216	lolD	5	511	CDN85338.1	323
3897	111.588	28.462	66.6	4.25e-13	10	260	111	28462	233	228	lolD	24	260	CDN85338.1	21
3898	90.1288	30.952	67	1e-13	9	210	118	30952	233	225	lolD	28	213	MTT18328.1	19
3899	90.1288	30.952	67	1e-13	9	210	118	30952	233	225	lolD	28	213	OLR34862.1	19
3900	90.1288	30.952	67	1e-13	9	210	118	30952	233	225	lolD	28	213	CDN82213.1	19
3901	91.8455	25.701	68.2	1.03e-13	7	214	145	25701	233	231	lolD	25	235	MTT17651.1	29
3902	99.1416	22.944	60.5	4.32e-11	8	231	155	22944	233	221	lolD	3	482	MTT17651.1	263
3903	91.8455	25.701	68.2	1.03e-13	7	214	145	25701	233	231	lolD	25	235	OLR36025.1	29
3904	99.1416	22.944	60.5	4.32e-11	8	231	155	22944	233	221	lolD	3	482	OLR36025.1	263
3905	91.8455	25.701	68.2	1.03e-13	7	214	145	25701	233	231	lolD	25	235	CDN82828.1	29
3906	99.1416	22.944	60.5	4.32e-11	8	231	155	22944	233	221	lolD	3	482	CDN82828.1	263
3907	83.2618	29.897	67	2.9e-13	6	194	120	29897	233	205	lolD	24	205	MTT19248.1	16
3908	90.5579	25.592	63.9	3.64e-12	6	211	121	25592	233	223	lolD	24	512	MTT19248.1	327
3909	83.2618	29.897	67	2.9e-13	6	194	120	29897	233	205	lolD	24	205	OLR33698.1	16
3910	90.5579	25.592	63.9	3.64e-12	6	211	121	25592	233	223	lolD	24	512	OLR33698.1	327
3911	83.2618	29.897	67	2.9e-13	6	194	120	29897	233	205	lolD	24	205	CDN84094.1	16
3912	90.5579	25.592	63.9	3.64e-12	6	211	121	25592	233	223	lolD	24	512	CDN84094.1	327
3913	81.5451	28.947	65.9	4.71e-13	3	190	128	28947	233	225	lolD	37	209	MTT20193.1	26
3914	81.5451	28.947	65.9	4.71e-13	3	190	128	28947	233	225	lolD	37	209	OLR37539.1	26
3915	81.5451	28.947	65.9	4.71e-13	3	190	128	28947	233	225	lolD	37	209	CDN81131.1	26
3916	82.4034	31.771	65.1	1.1e-12	8	192	114	31771	233	204	lolD	24	464	CDN81126.1	279
3918	82.4034	31.771	65.1	1.11e-12	8	192	114	31771	233	204	lolD	24	460	MTT20198.1	275
3920	82.4034	31.771	65.1	1.11e-12	8	192	114	31771	233	204	lolD	24	460	OLR37545.1	275
3922	94.8498	30.317	63.5	1.87e-12	7	221	139	30317	233	223	lolD	6	212	MTT22165.1	4
3923	94.8498	30.317	63.5	1.87e-12	7	221	139	30317	233	223	lolD	6	212	OLR32798.1	4
3924	94.8498	30.317	63.5	1.87e-12	7	221	139	30317	233	223	lolD	6	212	CDN82658.1	4
3925	96.5665	28	64.3	2.24e-12	10	225	130	28000	233	225	lolD	24	233	MTT18626.1	18
3926	90.1288	30	58.2	3.34e-10	9	210	116	30000	233	208	lolD	3	499	MTT18626.1	317
3927	96.5665	28	64.3	2.24e-12	10	225	130	28000	233	225	lolD	24	233	OLR36992.1	18
3928	90.1288	30	58.2	3.34e-10	9	210	116	30000	233	208	lolD	3	499	OLR36992.1	317
3929	96.5665	28	64.3	2.24e-12	10	225	130	28000	233	225	lolD	24	233	CDN81415.1	18
3930	90.1288	30	58.2	3.34e-10	9	210	116	30000	233	208	lolD	3	499	CDN81415.1	317
3931	104.721	30.328	63.2	5.83e-12	9	244	141	30328	233	231	lolD	2	574	MTT20073.1	346
3932	104.721	30.328	63.2	5.83e-12	9	244	141	30328	233	231	lolD	2	574	OLR37421.1	346
3933	104.721	30.328	63.2	5.83e-12	9	244	141	30328	233	231	lolD	2	574	CDN81253.1	346
3934	89.2704	25.481	60.8	1.34e-11	4	208	136	25481	233	212	lolD	5	189	OLR35555.1	1
3935	89.2704	25.481	60.5	1.38e-11	4	208	136	25481	233	212	lolD	5	189	MTT21950.1	1
3936	89.2704	25	58.5	7.7e-11	4	208	137	25000	233	212	lolD	5	189	CDN83688.1	1
3975	100	99.275	828	0	0	414	3	99275	414	414	lolE	1	414	MTT18779.1	1
3976	100	99.275	828	0	0	414	3	99275	414	414	lolE	1	414	OLR37139.1	1
3977	99.5169	99.272	824	0	0	412	3	99272	414	414	lolE	3	412	CDN81576.1	1
3978	100.242	26.747	136	1.6e-36	7	415	281	26747	414	411	lolE	1	396	MTT18777.1	1
3979	100.242	26.747	136	1.6e-36	7	415	281	26747	414	411	lolE	1	396	OLR37137.1	1
3980	100.242	26.747	136	1.6e-36	7	415	281	26747	414	411	lolE	1	396	CDN81574.1	1
3981	75.1208	23.794	64.3	1.27e-11	10	311	175	23794	414	414	lolE	133	427	MTT22227.1	150
3982	75.1208	23.794	64.3	1.27e-11	10	311	175	23794	414	414	lolE	133	427	OLR29023.1	150
3983	75.1208	23.794	64.3	1.27e-11	10	311	175	23794	414	414	lolE	133	427	CDN85444.1	150
3984	71.4976	21.622	58.9	6.22e-10	10	296	166	21622	414	414	lolE	137	376	MTT22226.1	129
3985	71.4976	21.622	58.9	6.22e-10	10	296	166	21622	414	414	lolE	137	376	OLR29022.1	129
3986	71.4976	21.622	58.9	6.22e-10	10	296	166	21622	414	414	lolE	137	376	CDN85443.1	129
3997	100	100	957	0	0	474	0	100000	474	474	lpd	1	474	MTT21246.1	1
3998	100	100	957	0	0	474	0	100000	474	474	lpd	1	474	OLR36763.1	1
3999	100	100	956	0	0	474	0	100000	474	474	lpd	1	495	CDN80499.1	22
4000	96.6245	38.428	283	5.92e-91	6	458	270	38428	474	456	lpd	9	462	MTT17942.1	7
4001	96.6245	38.428	283	5.92e-91	6	458	270	38428	474	456	lpd	9	462	CDN84908.1	7
4002	78.0591	39.189	239	8.47e-75	4	370	220	39189	474	456	lpd	90	393	OLR36473.1	26
4003	98.5232	27.409	186	3.85e-54	10	467	319	27409	474	456	lpd	1	458	MTT20525.1	1
4004	98.5232	27.409	186	3.85e-54	10	467	319	27409	474	456	lpd	1	458	OLR34287.1	1
4005	98.5232	27.409	186	3.85e-54	10	467	319	27409	474	456	lpd	1	458	CDN84807.1	1
4006	95.9916	28.352	180	7.3e-52	9	455	296	28352	474	453	lpd	6	434	MTT19205.1	3
4007	95.9916	28.352	180	7.3e-52	9	455	296	28352	474	453	lpd	6	434	OLR37942.1	3
4008	95.9916	28.352	180	9.03e-52	9	455	296	28352	474	453	lpd	6	443	CDN80702.1	12
4009	99.1561	28.723	177	4.64e-50	9	470	315	28723	474	466	lpd	8	559	MTT22094.1	99
4010	92.1941	27.918	145	3.64e-39	11	437	291	27918	474	450	lpd	24	444	MTT19390.1	22
4011	92.1941	27.918	145	3.64e-39	11	437	291	27918	474	450	lpd	24	444	OLR32835.1	22
4012	92.1941	27.918	145	3.64e-39	11	437	291	27918	474	450	lpd	24	444	CDN84242.1	22
4064	100	100	375	7.39e-136	0	185	0	100000	185	185	lptA	1	185	MTT21320.1	1
4065	100	100	375	7.39e-136	0	185	0	100000	185	185	lptA	1	185	OLR34749.1	1
4066	100	100	375	1.15e-135	0	185	0	100000	185	185	lptA	1	192	CDN83944.1	8
4091	100	100	485	2.79e-177	0	241	0	100000	241	241	lptB	1	241	MTT21319.1	1
4092	100	100	485	2.79e-177	0	241	0	100000	241	241	lptB	1	241	OLR34748.1	1
4093	100	100	485	2.79e-177	0	241	0	100000	241	241	lptB	1	241	CDN83945.1	1
4094	97.5104	32.766	133	8.94e-39	3	235	152	32766	241	236	lptB	4	236	MTT19341.1	6
4095	97.5104	32.766	133	9.16e-39	3	235	152	32766	241	236	lptB	4	232	OLR32900.1	2
4096	97.5104	32.766	133	1.07e-38	3	235	152	32766	241	236	lptB	4	240	CDN84190.1	10
4097	103.32	31.325	133	1.93e-38	3	249	156	31325	241	237	lptB	4	254	MTT19342.1	6
4098	103.32	31.325	133	1.93e-38	3	249	156	31325	241	237	lptB	4	254	OLR32881.1	6
4099	103.32	31.325	133	1.93e-38	3	249	156	31325	241	237	lptB	4	254	CDN84191.1	6
4100	99.5851	32.5	135	2.78e-38	5	240	153	32500	241	241	lptB	8	243	MTT19556.1	7
4101	99.5851	32.5	135	2.78e-38	5	240	153	32500	241	241	lptB	8	243	OLR35375.1	7
4102	99.5851	32.5	135	2.78e-38	5	240	153	32500	241	241	lptB	8	243	CDN83086.1	7
4103	100	33.61	128	1.62e-35	5	241	141	33610	241	237	lptB	4	248	MTT20104.1	20
4104	100	33.61	128	1.62e-35	5	241	141	33610	241	237	lptB	4	248	OLR37451.1	20
4105	100	33.61	128	2.53e-35	5	241	141	33610	241	237	lptB	4	275	CDN81221.1	47
4106	98.3402	32.068	119	3.71e-33	4	237	153	32068	241	234	lptB	3	235	MTT22255.1	2
4107	98.3402	32.068	119	3.71e-33	4	237	153	32068	241	234	lptB	3	235	OLR29160.1	2
4108	98.3402	32.068	119	3.71e-33	4	237	153	32068	241	234	lptB	3	235	CDN85185.1	2
4109	91.7012	31.674	119	1.6e-32	4	221	147	31674	241	225	lptB	7	223	MTT17631.1	5
4110	91.7012	31.674	119	1.6e-32	4	221	147	31674	241	225	lptB	7	223	OLR36006.1	5
4111	91.7012	31.674	119	1.6e-32	4	221	147	31674	241	225	lptB	7	223	CDN82807.1	5
4112	98.3402	31.224	113	7.38e-31	3	237	159	31224	241	234	lptB	1	236	MTT20797.1	1
4113	98.3402	31.224	113	7.38e-31	3	237	159	31224	241	234	lptB	1	236	OLR37257.1	1
4114	98.3402	31.224	113	7.38e-31	3	237	159	31224	241	234	lptB	1	236	CDN81699.1	1
4115	90.8714	31.507	116	3.15e-30	3	219	146	31507	241	224	lptB	6	551	CDN81160.1	337
4116	95.0207	31.004	110	4.87e-28	6	229	148	31004	241	226	lptB	2	231	CDN81160.1	9
4117	90.8714	31.507	116	3.27e-30	3	219	146	31507	241	224	lptB	6	546	MTT20164.1	332
4118	95.0207	31.004	110	4.66e-28	6	229	148	31004	241	226	lptB	2	226	MTT20164.1	4
4119	90.8714	31.507	116	3.27e-30	3	219	146	31507	241	224	lptB	6	546	OLR37510.1	332
4120	95.0207	31.004	110	4.66e-28	6	229	148	31004	241	226	lptB	2	226	OLR37510.1	4
4121	90.4564	29.817	114	3.45e-30	3	218	148	29817	241	227	lptB	11	238	MTT18787.1	25
4122	90.4564	29.817	114	3.45e-30	3	218	148	29817	241	227	lptB	11	238	OLR37147.1	25
4123	90.4564	29.817	114	3.45e-30	3	218	148	29817	241	227	lptB	11	238	CDN81584.1	25
4124	98.7552	31.933	110	7.41e-30	5	238	150	31933	241	240	lptB	4	228	MTT19155.1	2
4125	98.7552	31.933	110	7.41e-30	5	238	150	31933	241	240	lptB	4	228	OLR37895.1	2
4126	98.7552	31.933	110	7.41e-30	5	238	150	31933	241	240	lptB	4	228	CDN80756.1	2
4127	99.1701	29.707	110	1.2e-29	1	239	161	29707	241	232	lptB	1	239	MTT20465.1	1
4128	99.1701	29.707	110	1.2e-29	1	239	161	29707	241	232	lptB	1	239	OLR34220.1	1
4129	99.1701	29.707	110	1.2e-29	1	239	161	29707	241	232	lptB	1	239	CDN82478.1	1
4130	95.4357	30.435	107	1.62e-28	6	230	149	30435	241	225	lptB	2	235	MTT21251.1	11
4131	95.4357	30.435	107	1.62e-28	6	230	149	30435	241	225	lptB	2	235	OLR34682.1	11
4132	95.4357	30.435	107	1.62e-28	6	230	149	30435	241	225	lptB	2	235	CDN84016.1	11
4133	94.6058	29.386	109	2.13e-28	4	228	150	29386	241	224	lptB	1	221	MTT17916.1	1
4134	94.6058	29.386	109	2.13e-28	4	228	150	29386	241	224	lptB	1	221	OLR36498.1	1
4135	94.6058	31.14	108	2.39e-28	6	228	143	31140	241	225	lptB	8	229	MTT21158.1	6
4136	94.6058	31.14	108	2.39e-28	6	228	143	31140	241	225	lptB	8	229	OLR36849.1	6
4137	94.6058	31.14	108	2.39e-28	6	228	143	31140	241	225	lptB	8	229	CDN80591.1	6
4138	94.6058	29.386	109	2.73e-28	4	228	150	29386	241	224	lptB	1	251	CDN84880.1	31
4139	93.7759	27.876	108	3.74e-28	4	226	144	27876	241	221	lptB	4	216	MTT22121.1	2
4140	93.7759	27.434	105	4.48e-27	4	226	145	27434	241	221	lptB	4	216	OLR29449.1	2
4141	89.2116	29.767	101	1.07e-26	3	215	146	29767	241	236	lptB	23	229	MTT18860.1	19
4142	89.2116	29.767	101	1.07e-26	3	215	146	29767	241	236	lptB	23	229	OLR36707.1	19
4143	89.2116	29.767	101	1.39e-26	3	215	146	29767	241	236	lptB	23	236	CDN80442.1	26
4144	95.0207	27.074	101	1.97e-26	3	229	164	27074	241	233	lptB	7	232	MTT20150.1	5
4145	95.0207	27.074	101	1.97e-26	3	229	164	27074	241	233	lptB	7	232	OLR37496.1	5
4146	95.0207	27.074	101	1.97e-26	3	229	164	27074	241	233	lptB	7	232	CDN81176.1	5
4147	93.361	32.444	101	3.4e-26	5	225	140	32444	241	233	lptB	16	240	MTT21325.1	21
4148	93.361	32.444	101	3.4e-26	5	225	140	32444	241	233	lptB	16	240	OLR34754.1	21
4149	93.361	32.444	101	3.4e-26	5	225	140	32444	241	233	lptB	16	240	CDN83939.1	21
4150	92.1162	29.73	104	4.51e-26	4	222	151	29730	241	226	lptB	6	495	CDN84230.1	278
4151	95.0207	27.948	82.4	2.39e-18	8	229	151	27948	241	229	lptB	9	239	CDN84230.1	17
4152	92.1162	29.73	104	4.83e-26	4	222	151	29730	241	226	lptB	6	496	MTT19379.1	279
4153	95.0207	27.948	82	2.6e-18	8	229	151	27948	241	229	lptB	9	240	MTT19379.1	18
4154	92.1162	29.73	104	4.83e-26	4	222	151	29730	241	226	lptB	6	496	OLR32845.1	279
4155	95.0207	27.948	82	2.6e-18	8	229	151	27948	241	229	lptB	9	240	OLR32845.1	18
4156	98.7552	29.412	100	7.48e-26	5	238	159	29412	241	234	lptB	3	245	MTT21206.1	11
4157	98.7552	29.412	100	7.48e-26	5	238	159	29412	241	234	lptB	3	245	OLR36802.1	11
4158	98.7552	29.412	100	7.48e-26	5	238	159	29412	241	234	lptB	3	245	CDN80540.1	11
4159	91.7012	32.579	99.8	8.53e-26	6	221	129	32579	241	221	lptB	2	204	MTT18182.1	3
4160	91.7012	32.579	99.8	8.53e-26	6	221	129	32579	241	221	lptB	2	204	OLR35010.1	3
4161	91.7012	32.579	99.8	8.53e-26	6	221	129	32579	241	221	lptB	2	204	CDN82362.1	3
4162	97.5104	31.915	100	9.96e-26	6	235	141	31915	241	224	lptB	7	240	MTT18007.1	8
4163	97.5104	31.915	100	9.96e-26	6	235	141	31915	241	224	lptB	7	240	OLR36409.1	8
4164	97.5104	31.915	100	9.96e-26	6	235	141	31915	241	224	lptB	7	240	CDN84976.1	8
4165	83.4025	32.338	98.6	1.12e-25	5	201	125	32338	241	199	lptB	4	196	MTT18283.1	2
4166	83.4025	32.338	98.6	1.12e-25	5	201	125	32338	241	199	lptB	4	196	OLR34908.1	2
4167	83.4025	32.338	99	1.34e-25	5	201	125	32338	241	199	lptB	4	207	CDN82260.1	13
4168	90.4564	28.899	100	1.41e-25	3	218	150	28899	241	224	lptB	8	222	MTT21550.1	9
4169	90.4564	28.899	100	1.41e-25	3	218	150	28899	241	224	lptB	8	222	OLR35306.1	9
4170	90.4564	28.899	100	1.41e-25	3	218	150	28899	241	224	lptB	8	222	CDN81999.1	9
4171	95.4357	28.261	99.8	3.06e-25	6	230	147	28261	241	225	lptB	4	224	MTT21235.1	5
4172	95.4357	28.261	99.8	3.06e-25	6	230	147	28261	241	225	lptB	4	224	OLR36774.1	5
4173	95.4357	28.261	99.8	3.06e-25	6	230	147	28261	241	225	lptB	4	224	CDN80510.1	5
4174	95.8506	29.004	100	4.04e-25	5	231	148	29004	241	238	lptB	19	269	MTT19707.1	44
4175	95.8506	29.004	100	4.04e-25	5	231	148	29004	241	238	lptB	19	269	OLR31826.1	44
4176	95.8506	29.004	100	4.04e-25	5	231	148	29004	241	238	lptB	19	269	CDN83277.1	44
4177	87.9668	30.66	96.3	1.49e-24	3	212	142	30660	241	219	lptB	13	223	MTT20095.1	12
4178	87.9668	30.66	96.3	1.49e-24	3	212	142	30660	241	219	lptB	13	223	OLR37442.1	12
4179	96.6805	24.893	99.4	2.61e-24	1	233	172	24893	241	231	lptB	2	235	MTT21057.1	3
4180	91.7012	28.054	88.2	1.76e-20	5	221	144	28054	241	227	lptB	19	485	MTT21057.1	268
4181	96.6805	24.893	99.4	2.61e-24	1	233	172	24893	241	231	lptB	2	235	OLR35736.1	3
4182	91.7012	28.054	88.2	1.76e-20	5	221	144	28054	241	227	lptB	19	485	OLR35736.1	268
4183	96.6805	24.893	99.4	2.61e-24	1	233	172	24893	241	231	lptB	2	235	CDN84582.1	3
4184	91.7012	28.054	88.2	1.76e-20	5	221	144	28054	241	227	lptB	19	485	CDN84582.1	268
4185	87.9668	30.66	96.3	2.93e-24	3	212	142	30660	241	219	lptB	13	256	CDN81230.1	45
4186	101.245	27.869	94.4	9.82e-24	6	244	153	27869	241	234	lptB	4	235	MTT19402.1	2
4187	101.245	27.869	94.4	9.82e-24	6	244	153	27869	241	234	lptB	4	235	OLR32822.1	2
4188	101.245	27.869	94.4	1.29e-23	6	244	153	27869	241	234	lptB	4	245	CDN84257.1	12
4189	90.8714	30.594	93.2	2.46e-23	4	219	141	30594	241	216	lptB	4	215	MTT20723.1	2
4190	90.8714	30.594	93.2	2.46e-23	4	219	141	30594	241	216	lptB	4	215	OLR37642.1	2
4191	90.8714	30.594	93.2	2.46e-23	4	219	141	30594	241	216	lptB	4	215	CDN81023.1	2
4192	94.6058	27.632	95.1	3.01e-23	4	228	159	27632	241	226	lptB	1	224	MTT19337.1	1
4193	94.6058	27.632	95.1	3.01e-23	4	228	159	27632	241	226	lptB	1	224	OLR32886.1	1
4194	94.6058	27.632	94.7	3.83e-23	4	228	159	27632	241	226	lptB	1	237	CDN84185.1	14
4195	98.7552	27.731	92.8	4.94e-23	3	238	167	27731	241	234	lptB	1	241	MTT20664.1	5
4196	98.7552	27.731	92.8	4.94e-23	3	238	167	27731	241	234	lptB	1	241	OLR37701.1	5
4197	98.7552	27.731	92.8	4.94e-23	3	238	167	27731	241	234	lptB	1	241	CDN80961.1	5
4198	95.8506	27.273	92.4	5.31e-23	7	231	144	27273	241	216	lptB	2	231	MTT21081.1	9
4199	95.8506	27.273	92.4	5.31e-23	7	231	144	27273	241	216	lptB	2	231	OLR35758.1	9
4200	95.8506	27.273	92.4	5.31e-23	7	231	144	27273	241	216	lptB	2	231	CDN84558.1	9
4201	99.1701	28.452	92.4	8.58e-23	5	239	155	28452	241	236	lptB	3	240	MTT20840.1	13
4202	99.1701	28.452	92.4	8.58e-23	5	239	155	28452	241	236	lptB	3	240	OLR37213.1	13
4203	99.1701	28.452	92.4	8.98e-23	5	239	155	28452	241	236	lptB	3	239	CDN81652.1	12
4204	95.8506	28.571	94.4	1.42e-22	4	231	158	28571	241	233	lptB	4	236	MTT22156.1	12
4205	85.4772	29.126	87.4	3.58e-20	3	206	126	29126	241	213	lptB	21	479	MTT22156.1	281
4206	90.4564	27.523	93.6	2.53e-22	2	218	154	27523	241	217	lptB	4	222	MTT19804.1	5
4207	87.1369	27.619	83.6	8.2e-19	3	210	142	27619	241	218	lptB	19	486	MTT19804.1	277
4208	90.4564	27.523	93.6	2.53e-22	2	218	154	27523	241	217	lptB	4	222	OLR35920.1	5
4209	87.1369	27.619	83.6	8.2e-19	3	210	142	27619	241	218	lptB	19	486	OLR35920.1	277
4210	90.4564	27.523	93.6	2.53e-22	2	218	154	27523	241	217	lptB	4	222	CDN84323.1	5
4211	87.1369	27.619	83.6	8.2e-19	3	210	142	27619	241	218	lptB	19	486	CDN84323.1	277
4212	84.2324	30.542	90.1	2.81e-22	4	203	132	30542	241	198	lptB	4	207	MTT18778.1	6
4213	84.2324	30.542	90.1	2.81e-22	4	203	132	30542	241	198	lptB	4	207	OLR37138.1	6
4214	84.2324	30.542	90.1	2.81e-22	4	203	132	30542	241	198	lptB	4	207	CDN81575.1	6
4215	94.1909	27.753	92.4	2.82e-22	6	227	156	27753	241	224	lptB	1	222	MTT20911.1	1
4216	94.1909	27.753	92.4	2.82e-22	6	227	156	27753	241	224	lptB	1	222	OLR35239.1	1
4217	94.1909	27.753	92.4	2.82e-22	6	227	156	27753	241	224	lptB	1	222	CDN81930.1	1
4218	93.361	25.333	93.2	3.16e-22	4	225	153	25333	241	217	lptB	4	494	MTT20651.1	274
4219	88.3817	24.883	86.7	5.85e-20	1	213	158	24883	241	218	lptB	8	234	MTT20651.1	22
4220	93.361	25.333	93.2	3.16e-22	4	225	153	25333	241	217	lptB	4	494	OLR37714.1	274
4221	88.3817	24.883	86.7	5.85e-20	1	213	158	24883	241	218	lptB	8	234	OLR37714.1	22
4222	93.361	25.333	93.2	3.16e-22	4	225	153	25333	241	217	lptB	4	494	CDN80947.1	274
4223	88.3817	24.883	86.7	5.85e-20	1	213	158	24883	241	218	lptB	8	234	CDN80947.1	22
4224	99.1701	28.87	92.4	5.7e-22	4	239	165	28870	241	239	lptB	4	246	MTT18141.1	10
4225	86.3071	29.808	90.5	3.26e-21	3	208	138	29808	241	210	lptB	11	475	MTT18141.1	268
4226	99.1701	28.87	92.4	5.7e-22	4	239	165	28870	241	239	lptB	4	246	OLR36280.1	10
4227	86.3071	29.808	90.5	3.26e-21	3	208	138	29808	241	210	lptB	11	475	OLR36280.1	268
4228	99.1701	28.87	92.4	5.7e-22	4	239	165	28870	241	239	lptB	4	246	CDN85114.1	10
4229	86.3071	29.808	90.5	3.26e-21	3	208	138	29808	241	210	lptB	11	475	CDN85114.1	268
4230	90.4564	26.606	90.5	2.65e-21	2	218	154	26606	241	217	lptB	4	229	MTT17651.1	14
4231	85.0622	25.366	67.8	1.99e-13	5	205	142	25366	241	213	lptB	19	482	MTT17651.1	279
4232	90.4564	26.606	90.5	2.65e-21	2	218	154	26606	241	217	lptB	4	229	OLR36025.1	14
4233	85.0622	25.366	67.8	1.99e-13	5	205	142	25366	241	213	lptB	19	482	OLR36025.1	279
4234	90.4564	26.606	90.5	2.65e-21	2	218	154	26606	241	217	lptB	4	229	CDN82828.1	14
4235	85.0622	25.366	67.8	1.99e-13	5	205	142	25366	241	213	lptB	19	482	CDN82828.1	279
4236	94.6058	28.509	90.1	4.45e-21	7	228	148	28509	241	233	lptB	18	525	MTT17682.1	301
4237	99.1701	27.197	61.6	2e-11	9	239	140	27197	241	216	lptB	4	236	MTT17682.1	6
4238	94.6058	28.509	90.1	4.45e-21	7	228	148	28509	241	233	lptB	18	525	OLR36057.1	301
4239	99.1701	27.197	61.6	2e-11	9	239	140	27197	241	216	lptB	4	236	OLR36057.1	6
4240	94.6058	28.509	90.1	4.45e-21	7	228	148	28509	241	233	lptB	18	525	CDN82859.1	301
4241	99.1701	27.197	61.6	2e-11	9	239	140	27197	241	216	lptB	4	236	CDN82859.1	6
4242	90.8714	31.05	85.5	1.05e-20	5	219	139	31050	241	219	lptB	7	217	MTT19352.1	5
4243	90.8714	31.05	85.5	1.05e-20	5	219	139	31050	241	219	lptB	7	217	OLR32872.1	5
4244	90.8714	31.05	85.5	1.05e-20	5	219	139	31050	241	219	lptB	7	217	CDN84202.1	5
4245	103.32	27.711	87.8	2.73e-20	5	249	169	27711	241	240	lptB	1	247	MTT17989.1	1
4246	94.6058	27.632	85.5	1.54e-19	5	228	151	27632	241	230	lptB	16	502	MTT17989.1	276
4247	103.32	27.711	87.8	2.73e-20	5	249	169	27711	241	240	lptB	1	247	OLR36426.1	1
4248	94.6058	27.632	85.5	1.54e-19	5	228	151	27632	241	230	lptB	16	502	OLR36426.1	276
4249	103.32	27.711	87.8	2.73e-20	5	249	169	27711	241	240	lptB	1	247	CDN84958.1	1
4250	94.6058	27.632	85.5	1.54e-19	5	228	151	27632	241	230	lptB	16	502	CDN84958.1	276
4251	91.2863	30.455	87.4	3.7e-20	4	220	127	30455	241	213	lptB	11	480	MTT19455.1	270
4252	101.245	26.639	77.4	1.02e-16	5	244	169	26639	241	238	lptB	1	249	MTT19455.1	10
4253	91.2863	30.455	87.4	3.7e-20	4	220	127	30455	241	213	lptB	11	480	OLR35472.1	270
4254	101.245	26.639	77.4	1.02e-16	5	244	169	26639	241	238	lptB	1	249	OLR35472.1	10
4255	91.2863	30.455	87.4	3.7e-20	4	220	127	30455	241	213	lptB	11	480	CDN83190.1	270
4256	101.245	26.639	77.4	1.02e-16	5	244	169	26639	241	238	lptB	1	249	CDN83190.1	10
4257	98.7552	30.252	83.2	1.51e-19	6	238	155	30252	241	234	lptB	1	231	MTT22165.1	1
4258	98.7552	30.252	83.2	1.51e-19	6	238	155	30252	241	234	lptB	1	231	OLR32798.1	1
4259	98.7552	30.252	83.2	1.51e-19	6	238	155	30252	241	234	lptB	1	231	CDN82658.1	1
4260	87.1369	28.095	82.4	3.92e-19	4	210	145	28095	241	216	lptB	13	231	MTT19369.1	22
4261	87.1369	28.095	82.4	3.92e-19	4	210	145	28095	241	216	lptB	13	231	OLR32855.1	22
4262	87.1369	28.095	82.4	3.92e-19	4	210	145	28095	241	216	lptB	13	231	CDN84219.1	22
4263	95.0207	30.131	81.3	6.62e-19	9	229	130	30131	241	240	lptB	26	235	MTT18328.1	23
4264	95.0207	30.131	81.3	6.62e-19	9	229	130	30131	241	240	lptB	26	235	OLR34862.1	23
4265	95.0207	30.131	81.3	6.62e-19	9	229	130	30131	241	240	lptB	26	235	CDN82213.1	23
4266	83.8174	29.703	82.8	1.41e-18	3	202	137	29703	241	216	lptB	18	222	MTT20080.1	23
4267	83.8174	29.703	82.8	1.41e-18	3	202	137	29703	241	216	lptB	18	222	OLR37428.1	23
4268	83.8174	29.703	82.8	1.41e-18	3	202	137	29703	241	216	lptB	18	222	CDN81246.1	23
4269	100	24.481	81.6	3.48e-18	3	241	174	24481	241	239	lptB	4	260	CDN82403.1	23
4270	91.7012	28.959	72.8	4e-15	5	221	132	28959	241	215	lptB	12	492	CDN82403.1	280
4271	100	24.481	81.3	4e-18	3	241	174	24481	241	239	lptB	4	245	MTT20393.1	8
4272	91.7012	28.959	72.4	4.54e-15	5	221	132	28959	241	215	lptB	12	477	MTT20393.1	265
4273	100	24.481	81.3	4e-18	3	241	174	24481	241	239	lptB	4	245	OLR34149.1	8
4274	91.7012	28.959	72.4	4.54e-15	5	221	132	28959	241	215	lptB	12	477	OLR34149.1	265
4275	83.4025	26.866	78.6	4.43e-18	7	201	134	26866	241	199	lptB	4	200	MTT19034.1	8
4276	83.4025	26.866	78.6	4.43e-18	7	201	134	26866	241	199	lptB	4	200	OLR37773.1	8
4277	83.4025	26.866	78.6	4.43e-18	7	201	134	26866	241	199	lptB	4	200	CDN80884.1	8
4278	94.1909	28.634	81.3	5.11e-18	6	227	154	28634	241	225	lptB	3	560	MTT20074.1	338
4279	94.1909	28.634	81.3	5.11e-18	6	227	154	28634	241	225	lptB	3	560	OLR37422.1	338
4280	94.1909	28.634	81.3	5.11e-18	6	227	154	28634	241	225	lptB	3	560	CDN81252.1	338
4281	90.0415	26.728	80.1	1.19e-17	3	217	155	26728	241	217	lptB	4	221	MTT21270.1	6
4282	90.4564	23.394	65.1	1.54e-12	4	218	153	23394	241	210	lptB	2	472	MTT21270.1	260
4283	90.0415	26.728	80.1	1.19e-17	3	217	155	26728	241	217	lptB	4	221	OLR34701.1	6
4284	90.4564	23.394	65.1	1.54e-12	4	218	153	23394	241	210	lptB	2	472	OLR34701.1	260
4285	90.0415	26.728	80.1	1.19e-17	3	217	155	26728	241	217	lptB	4	221	CDN83997.1	6
4286	90.4564	23.394	65.1	1.54e-12	4	218	153	23394	241	210	lptB	2	472	CDN83997.1	260
4287	99.5851	28.333	77	4.03e-17	5	240	157	28333	241	234	lptB	4	243	MTT20277.1	10
4288	99.5851	28.333	77	4.03e-17	5	240	157	28333	241	234	lptB	4	243	OLR35643.1	10
4289	99.5851	28.333	77	4.03e-17	5	240	157	28333	241	234	lptB	4	243	CDN83777.1	10
4290	86.3071	25.962	75.9	8.03e-17	3	208	140	25962	241	215	lptB	9	211	MTT18617.1	17
4291	86.3071	25.962	75.9	8.03e-17	3	208	140	25962	241	215	lptB	9	211	OLR36983.1	17
4292	86.3071	25.962	75.9	8.03e-17	3	208	140	25962	241	215	lptB	9	211	CDN81406.1	17
4293	81.3278	26.02	75.1	1.2e-16	2	196	138	26020	241	196	lptB	4	202	MTT22225.1	11
4294	81.3278	26.02	75.1	1.2e-16	2	196	138	26020	241	196	lptB	4	202	OLR29021.1	11
4295	81.3278	26.02	75.1	1.2e-16	2	196	138	26020	241	196	lptB	4	202	CDN85442.1	11
4296	83.8174	26.733	74.7	1.27e-16	4	202	142	26733	241	215	lptB	18	224	MTT19029.1	25
4297	83.8174	26.733	74.7	1.27e-16	4	202	142	26733	241	215	lptB	18	224	OLR37770.1	25
4298	83.8174	26.733	74.7	1.27e-16	4	202	142	26733	241	215	lptB	18	224	CDN80889.1	25
4299	86.722	30.622	77	1.36e-16	7	209	135	30622	241	219	lptB	19	546	MTT20130.1	340
4300	104.149	23.108	60.5	6.25e-11	7	251	160	23108	241	225	lptB	3	257	MTT20130.1	12
4301	86.722	30.622	77	1.36e-16	7	209	135	30622	241	219	lptB	19	546	OLR37476.1	340
4302	104.149	23.108	60.5	6.25e-11	7	251	160	23108	241	225	lptB	3	257	OLR37476.1	12
4303	86.722	30.622	77	1.36e-16	7	209	135	30622	241	219	lptB	19	546	CDN81195.1	340
4304	104.149	23.108	60.5	6.25e-11	7	251	160	23108	241	225	lptB	3	257	CDN81195.1	12
4305	97.9253	26.271	74.3	2.6e-16	5	236	161	26271	241	229	lptB	4	238	MTT17999.1	6
4306	97.9253	26.271	74.3	2.6e-16	5	236	161	26271	241	229	lptB	4	238	OLR36417.1	6
4307	97.9253	26.271	74.3	2.97e-16	5	236	161	26271	241	229	lptB	4	248	CDN84968.1	16
4308	102.905	25.806	73.6	5.73e-16	5	248	161	25806	241	233	lptB	4	248	MTT17800.1	6
4309	102.905	25.806	73.6	5.73e-16	5	248	161	25806	241	233	lptB	4	248	OLR36178.1	6
4310	102.905	25.806	73.6	5.73e-16	5	248	161	25806	241	233	lptB	4	248	CDN82983.1	6
4311	103.32	24.096	72	1.95e-15	6	249	172	24096	241	236	lptB	4	253	MTT20890.1	6
4312	103.32	24.096	72	1.95e-15	6	249	172	24096	241	236	lptB	4	253	OLR35219.1	6
4313	103.32	24.096	72	1.95e-15	6	249	172	24096	241	236	lptB	4	253	CDN81909.1	6
4314	91.2863	24.091	72.8	2.02e-15	6	220	153	24091	241	225	lptB	19	257	MTT22073.1	39
4315	91.2863	24.091	72.8	2.02e-15	6	220	153	24091	241	225	lptB	19	257	OLR37335.1	39
4316	91.2863	24.091	72.8	2.02e-15	6	220	153	24091	241	225	lptB	19	257	CDN81791.1	39
4317	91.7012	25.339	70.9	9.27e-15	6	221	158	25339	241	227	lptB	14	255	MTT22072.1	35
4318	91.7012	25.339	70.9	9.27e-15	6	221	158	25339	241	227	lptB	14	255	OLR37336.1	35
4319	91.7012	25.339	70.9	9.27e-15	6	221	158	25339	241	227	lptB	14	255	CDN81792.1	35
4320	92.5311	27.803	71.2	1.17e-14	7	223	132	27803	241	215	lptB	12	485	CDN81126.1	273
4322	92.5311	27.803	71.2	1.31e-14	7	223	132	27803	241	215	lptB	12	481	MTT20198.1	269
4324	92.5311	27.803	71.2	1.31e-14	7	223	132	27803	241	215	lptB	12	481	OLR37545.1	269
4326	105.394	27.953	70.5	1.38e-14	10	254	155	27953	241	229	lptB	1	251	MTT20891.1	1
4327	105.394	27.953	70.5	1.38e-14	10	254	155	27953	241	229	lptB	1	251	OLR35220.1	1
4328	105.394	27.953	70.5	1.38e-14	10	254	155	27953	241	229	lptB	1	251	CDN81910.1	1
4329	80.9129	29.231	68.2	2.92e-14	5	195	127	29231	241	202	lptB	18	216	MTT17998.1	23
4330	80.9129	29.231	68.2	2.92e-14	5	195	127	29231	241	202	lptB	18	216	OLR36418.1	23
4331	80.9129	29.231	68.2	2.92e-14	5	195	127	29231	241	202	lptB	18	216	CDN84967.1	23
4332	97.5104	25.106	70.1	2.93e-14	7	235	152	25106	241	225	lptB	3	562	MTT19077.1	340
4333	97.5104	25.106	70.1	2.93e-14	7	235	152	25106	241	225	lptB	3	562	OLR37816.1	340
4334	97.5104	25.106	70.1	2.93e-14	7	235	152	25106	241	225	lptB	3	562	CDN80839.1	340
4335	74.6888	27.778	66.2	1.4e-13	1	180	129	27778	241	200	lptB	21	199	MTT19947.1	21
4336	74.6888	27.778	66.2	1.4e-13	1	180	129	27778	241	200	lptB	21	199	OLR35121.1	21
4337	88.3817	29.577	67.8	1.73e-13	7	213	132	29577	241	225	lptB	22	567	MTT21686.1	364
4338	88.3817	29.577	67.8	1.73e-13	7	213	132	29577	241	225	lptB	22	567	OLR32759.1	364
4339	88.3817	29.577	67.8	1.73e-13	7	213	132	29577	241	225	lptB	22	567	CDN82598.1	364
4340	74.6888	27.778	66.2	1.95e-13	1	180	129	27778	241	200	lptB	21	210	CDN83549.1	32
4341	85.8921	29.469	65.5	2.55e-13	7	207	126	29469	241	200	lptB	1	194	CDN82878.1	1
4342	84.6473	29.412	63.2	1.69e-12	7	204	124	29412	241	200	lptB	4	192	MTT17699.1	2
4343	84.6473	29.412	63.2	1.69e-12	7	204	124	29412	241	200	lptB	4	192	OLR36077.1	2
4344	96.6805	25.751	63.2	6.53e-12	7	233	158	25751	241	230	lptB	7	571	MTT18598.1	345
4345	96.6805	25.751	63.2	6.53e-12	7	233	158	25751	241	230	lptB	7	571	OLR36964.1	345
4346	96.6805	25.751	63.2	6.53e-12	7	233	158	25751	241	230	lptB	7	571	CDN81387.1	345
4347	86.722	29.187	61.6	1.5e-11	4	209	129	29187	241	225	lptB	25	217	MTT20193.1	20
4348	86.722	29.187	61.6	1.5e-11	4	209	129	29187	241	225	lptB	25	217	OLR37539.1	20
4349	86.722	29.187	61.6	1.5e-11	4	209	129	29187	241	225	lptB	25	217	CDN81131.1	20
4350	90.4564	24.312	61.2	2.37e-11	5	218	157	24312	241	227	lptB	17	252	MTT19778.1	36
4351	90.4564	24.312	61.2	2.37e-11	5	218	157	24312	241	227	lptB	17	252	OLR35948.1	36
4352	90.4564	24.312	61.2	2.37e-11	5	218	157	24312	241	227	lptB	17	252	CDN84296.1	36
4353	71.3693	29.07	60.8	4.25e-11	4	172	97	29070	241	169	lptB	4	476	MTT18944.1	324
4354	84.2324	30.542	59.3	1.24e-10	8	203	87	30542	241	180	lptB	16	205	MTT18944.1	19
4355	71.3693	29.07	60.8	4.25e-11	4	172	97	29070	241	169	lptB	4	476	OLR36624.1	324
4356	84.2324	30.542	59.3	1.24e-10	8	203	87	30542	241	180	lptB	16	205	OLR36624.1	19
4357	71.3693	29.07	60.8	4.25e-11	4	172	97	29070	241	169	lptB	4	476	CDN85338.1	324
4358	84.2324	30.542	59.3	1.24e-10	8	203	87	30542	241	180	lptB	16	205	CDN85338.1	19
4359	90.8714	26.941	59.3	4.48e-11	5	219	154	26941	241	215	lptB	1	217	MTT17975.1	1
4360	90.8714	26.941	59.3	4.48e-11	5	219	154	26941	241	215	lptB	1	217	OLR36441.1	1
4361	90.8714	26.941	59.3	4.48e-11	5	219	154	26941	241	215	lptB	1	217	CDN84943.1	1
4362	93.361	26.222	59.7	5.24e-11	8	225	152	26222	241	216	lptB	4	228	MTT17976.1	6
4363	93.361	26.222	59.7	5.24e-11	8	225	152	26222	241	216	lptB	4	228	OLR36440.1	6
4364	92.5311	26.457	59.7	5.79e-11	8	223	150	26457	241	214	lptB	4	246	CDN84944.1	26
4365	93.361	24.889	57.8	4.78e-10	7	225	147	24889	241	232	lptB	19	565	MTT19078.1	352
4366	93.361	24.889	57.8	4.78e-10	7	225	147	24889	241	232	lptB	19	565	OLR37817.1	352
4367	93.361	24.889	57.8	4.78e-10	7	225	147	24889	241	232	lptB	19	565	CDN80838.1	352
4368	102.075	25.61	56.2	6.99e-10	5	246	170	25610	241	237	lptB	4	246	MTT18355.1	2
4369	102.075	25.61	56.2	6.99e-10	5	246	170	25610	241	237	lptB	4	246	OLR34533.1	2
4370	102.075	25.61	56.2	6.99e-10	5	246	170	25610	241	237	lptB	4	246	CDN82184.1	2
4438	100	99.107	1617	0	0	784	7	99107	784	784	lptD	1	784	MTT18875.1	1
4439	100	99.107	1617	0	0	784	7	99107	784	784	lptD	1	784	OLR36693.1	1
4440	100	99.107	1617	0	0	784	7	99107	784	784	lptD	1	784	CDN80426.1	1
4449	100	100	395	1.34e-143	0	193	0	100000	193	193	lptE	1	193	MTT20714.1	1
4450	100	100	395	1.34e-143	0	193	0	100000	193	193	lptE	1	193	OLR37651.1	1
4451	100	100	395	1.34e-143	0	193	0	100000	193	193	lptE	1	193	CDN81013.1	1
4458	100	100	739	0	0	366	0	100000	366	366	lptF	1	366	MTT18171.1	1
4459	100	100	739	0	0	366	0	100000	366	366	lptF	1	366	OLR36251.1	1
4460	100	100	739	0	0	366	0	100000	366	366	lptF	1	366	CDN85147.1	1
4461	92.8962	28.235	91.3	6.21e-21	8	340	223	28235	366	331	lptF	2	331	MTT20222.1	3
4462	92.8962	28.235	91.3	6.21e-21	8	340	223	28235	366	331	lptF	2	331	OLR35585.1	3
4463	92.8962	28.235	91.3	6.21e-21	8	340	223	28235	366	331	lptF	2	331	CDN83719.1	3
4471	100	99.722	727	0	0	360	1	99722	360	360	lptG	1	361	CDN85148.1	2
4472	100	99.722	726	0	0	360	1	99722	360	360	lptG	1	360	MTT18172.1	1
4473	100	99.722	726	0	0	360	1	99722	360	360	lptG	1	360	OLR36250.1	1
4474	89.1667	28.349	144	1.92e-40	3	321	227	28349	360	353	lptG	34	349	MTT20221.1	31
4475	89.1667	28.349	144	1.92e-40	3	321	227	28349	360	353	lptG	34	349	OLR35584.1	31
4476	89.1667	28.349	144	1.92e-40	3	321	227	28349	360	353	lptG	34	349	CDN83718.1	31
4494	100	100	533	0	0	262	0	100000	262	262	lpxA	1	262	MTT21177.1	1
4495	100	100	533	0	0	262	0	100000	262	262	lpxA	1	262	OLR36830.1	1
4496	100	100	533	0	0	262	0	100000	262	262	lpxA	1	262	CDN80568.1	1
4497	82.8244	27.65	61.2	2.91e-11	6	217	135	27650	262	210	lpxA	12	334	MTT21179.1	122
4498	82.8244	27.65	61.2	2.91e-11	6	217	135	27650	262	210	lpxA	12	334	OLR36828.1	122
4499	82.8244	27.65	61.2	2.91e-11	6	217	135	27650	262	210	lpxA	12	334	CDN80566.1	122
4524	100	98.953	774	0	0	382	4	98953	382	382	lpxB	1	382	MTT21176.1	1
4525	100	98.953	774	0	0	382	4	98953	382	382	lpxB	1	382	OLR36831.1	1
4526	100	98.953	774	0	0	382	4	98953	382	382	lpxB	1	382	CDN80569.1	1
4532	100	100	634	0	0	305	0	100000	305	305	lpxC	1	305	MTT18830.1	1
4533	100	100	634	0	0	305	0	100000	305	305	lpxC	1	305	OLR36736.1	1
4534	100	100	634	0	0	305	0	100000	305	305	lpxC	1	305	CDN80472.1	1
4538	100	99.707	692	0	0	341	1	99707	341	341	lpxD	1	341	MTT21179.1	1
4539	100	99.707	692	0	0	341	1	99707	341	341	lpxD	1	341	OLR36828.1	1
4540	100	99.707	692	0	0	341	1	99707	341	341	lpxD	1	341	CDN80566.1	1
4541	63.6364	27.65	61.2	4.04e-11	6	217	135	27650	341	334	lpxD	122	210	MTT21177.1	12
4542	63.6364	27.65	61.2	4.04e-11	6	217	135	27650	341	334	lpxD	122	210	OLR36830.1	12
4543	63.6364	27.65	61.2	4.04e-11	6	217	135	27650	341	334	lpxD	122	210	CDN80568.1	12
4579	100	99.167	493	1.39e-180	0	240	2	99167	240	240	lpxH	1	240	MTT21910.1	1
4580	100	99.167	493	1.39e-180	0	240	2	99167	240	240	lpxH	1	240	OLR37744.1	1
4581	100	99.167	493	1.39e-180	0	240	2	99167	240	240	lpxH	1	240	CDN80916.1	1
4591	100	98.171	650	0	0	328	6	98171	328	328	lpxK	1	328	MTT18599.1	1
4592	100	98.171	650	0	0	328	6	98171	328	328	lpxK	1	328	OLR36965.1	1
4593	100	98.171	650	0	0	328	6	98171	328	328	lpxK	1	328	CDN81388.1	1
4600	100	99.673	630	0	0	306	1	99673	306	306	lpxL	1	306	MTT18716.1	1
4601	100	99.673	630	0	0	306	1	99673	306	306	lpxL	1	306	OLR37078.1	1
4602	100	99.673	630	0	0	306	1	99673	306	306	lpxL	1	327	CDN81510.1	22
4603	98.366	54.817	362	9.46e-127	1	301	135	54817	306	306	lpxL	6	305	MTT17865.1	6
4604	98.366	54.817	362	9.46e-127	1	301	135	54817	306	306	lpxL	6	305	OLR30461.1	6
4605	98.366	54.817	363	1.48e-126	1	301	135	54817	306	306	lpxL	6	327	CDN83050.1	28
4606	100.98	29.773	122	7.66e-33	9	309	196	29773	306	301	lpxL	4	309	MTT18185.1	11
4607	100.98	29.773	122	7.66e-33	9	309	196	29773	306	301	lpxL	4	309	OLR35008.1	11
4608	100.98	29.773	122	7.66e-33	9	309	196	29773	306	301	lpxL	4	309	CDN82359.1	11
4618	100	98.171	326	5.72e-117	0	164	3	98171	164	164	lspA	1	164	MTT18905.1	1
4619	100	98.171	326	5.72e-117	0	164	3	98171	164	164	lspA	1	164	OLR36661.1	1
4620	100	98.171	326	5.72e-117	0	164	3	98171	164	164	lspA	1	164	CDN80395.1	1
4627	100	100	1038	0	0	505	0	100000	505	505	lysS	1	505	MTT19986.1	1
4628	100	100	1038	0	0	505	0	100000	505	505	lysS	1	505	OLR35087.1	1
4629	100	100	1038	0	0	505	0	100000	505	505	lysS	1	505	CDN83510.1	1
4630	100	88.515	937	0	0	505	58	88515	505	505	lysS	1	505	MTT18038.1	1
4631	100	88.515	937	0	0	505	58	88515	505	505	lysS	1	505	OLR36380.1	1
4632	100	88.515	937	0	0	505	58	88515	505	505	lysS	1	514	CDN85012.1	10
4633	63.5644	30.53	140	5.44e-38	9	321	195	30530	505	498	lysS	187	320	MTT18065.1	19
4634	63.5644	30.53	140	5.44e-38	9	321	195	30530	505	498	lysS	187	320	OLR36353.1	19
4635	63.5644	30.53	140	5.44e-38	9	321	195	30530	505	498	lysS	187	320	CDN85039.1	19
4636	60.198	28.289	94.7	6.52e-21	12	304	183	28289	505	345	lysS	61	298	MTT20364.1	11
4638	60.198	28.289	94.7	6.52e-21	12	304	183	28289	505	345	lysS	61	298	OLR30142.1	11
4640	60.198	28.289	94.7	6.52e-21	12	304	183	28289	505	345	lysS	61	298	CDN82373.1	11
4642	94.6535	21.339	63.5	4.33e-11	20	478	301	21339	505	499	lysS	63	458	MTT18614.1	15
4643	94.6535	21.339	63.5	4.33e-11	20	478	301	21339	505	499	lysS	63	458	OLR36980.1	15
4644	94.6535	21.339	63.5	4.33e-11	20	478	301	21339	505	499	lysS	63	458	CDN81403.1	15
4654	100	100	544	0	0	264	0	100000	264	264	map	1	264	MTT21190.1	1
4655	100	100	544	0	0	264	0	100000	264	264	map	1	264	OLR36817.1	1
4656	100	100	544	0	0	264	0	100000	264	264	map	1	264	CDN80555.1	1
4657	78.4091	25.604	73.2	2.69e-15	7	207	137	25604	264	205	map	5	322	MTT17873.1	127
4658	78.4091	25.604	73.2	2.69e-15	7	207	137	25604	264	205	map	5	322	OLR30468.1	127
4659	78.4091	25.604	73.2	2.69e-15	7	207	137	25604	264	205	map	5	322	CDN83057.1	127
4660	104.924	23.827	60.8	5.26e-11	8	277	175	23827	264	261	map	5	436	OLR35103.1	176
4661	104.924	23.827	60.1	1.04e-10	8	277	175	23827	264	261	map	5	436	MTT19968.1	176
4662	104.924	23.827	60.1	1.04e-10	8	277	175	23827	264	261	map	5	436	CDN83527.1	176
4674	100	99.557	1416	0	0	677	3	99557	677	677	metG	1	677	MTT17616.1	1
4675	100	99.557	1416	0	0	677	3	99557	677	677	metG	1	677	OLR35990.1	1
4676	100	99.557	1416	0	0	677	3	99557	677	677	metG	1	680	CDN82790.1	4
4677	100	98.671	1407	0	0	677	9	98671	677	677	metG	1	677	OLR29856.1	1
4705	100	100	795	0	0	384	0	100000	384	384	metK	1	388	CDN83564.1	5
4706	100	100	795	0	0	384	0	100000	384	384	metK	1	384	MTT19933.1	1
4707	100	100	795	0	0	384	0	100000	384	384	metK	1	384	OLR35137.1	1
4714	100	99.457	760	0	0	368	2	99457	368	368	mnmA	1	383	CDN81591.1	16
4715	100	99.457	760	0	0	368	2	99457	368	368	mnmA	1	368	MTT18794.1	1
4716	100	99.457	760	0	0	368	2	99457	368	368	mnmA	1	368	OLR37154.1	1
4734	100	100	717	0	0	360	0	100000	360	360	mraY	1	360	MTT18839.1	1
4735	100	100	717	0	0	360	0	100000	360	360	mraY	1	360	OLR36727.1	1
4736	100	100	717	0	0	360	0	100000	360	360	mraY	1	360	CDN80463.1	1
4749	100	100	1306	0	0	633	0	100000	633	633	mrdA	1	633	MTT20708.1	1
4750	100	100	1306	0	0	633	0	100000	633	633	mrdA	1	633	OLR37657.1	1
4751	100	100	1306	0	0	633	0	100000	633	633	mrdA	1	633	CDN81007.1	1
4752	100.474	25	139	3.41e-35	22	636	370	25000	633	617	mrdA	13	574	MTT18842.1	15
4753	100.474	25	139	3.41e-35	22	636	370	25000	633	617	mrdA	13	574	OLR36724.1	15
4754	100.474	25	139	3.41e-35	22	636	370	25000	633	617	mrdA	13	574	CDN80460.1	15
4764	100	99.73	728	0	0	370	1	99730	370	370	mrdB	1	370	MTT20707.1	1
4765	100	99.73	728	0	0	370	1	99730	370	370	mrdB	1	370	OLR37658.1	1
4766	100	99.73	728	0	0	370	1	99730	370	370	mrdB	1	370	CDN81006.1	1
4767	85.6757	31.861	166	4.97e-48	5	317	206	31861	370	365	mrdB	55	404	CDN80465.1	92
4768	85.6757	31.861	166	5.02e-48	5	317	206	31861	370	365	mrdB	55	403	MTT18837.1	91
4769	85.6757	31.861	166	5.02e-48	5	317	206	31861	370	365	mrdB	55	403	OLR36729.1	91
4776	100	100	696	0	0	347	0	100000	347	347	mreB	1	372	CDN83986.1	26
4777	100	100	696	0	0	347	0	100000	347	347	mreB	1	347	MTT21278.1	1
4778	100	100	696	0	0	347	0	100000	347	347	mreB	1	347	OLR34710.1	1
4779	97.9827	25.588	65.5	5.13e-12	12	340	219	25588	347	330	mreB	15	339	MTT20721.1	10
4780	97.9827	25.588	65.5	5.13e-12	12	340	219	25588	347	330	mreB	15	339	OLR37644.1	10
4781	97.9827	25.588	65.5	5.13e-12	12	340	219	25588	347	330	mreB	15	339	CDN81021.1	10
4782	71.1816	24.291	58.9	5.55e-10	7	247	145	24291	347	222	mreB	15	285	CDN83173.1	42
4783	71.1816	24.291	58.9	6.26e-10	7	247	145	24291	347	222	mreB	15	267	MTT19470.1	24
4784	71.1816	24.291	58.9	6.26e-10	7	247	145	24291	347	222	mreB	15	267	OLR35458.1	24
4800	100	99.455	733	0	0	367	2	99455	367	367	mreC	1	367	MTT21279.1	1
4801	100	99.455	733	0	0	367	2	99455	367	367	mreC	1	367	OLR34711.1	1
4802	100	99.455	733	0	0	367	2	99455	367	367	mreC	1	367	CDN83985.1	1
4810	100	100	310	6.54e-111	0	162	0	100000	162	162	mreD	1	162	MTT21280.1	1
4811	100	100	310	6.54e-111	0	162	0	100000	162	162	mreD	1	162	OLR34712.1	1
4812	100	100	310	6.54e-111	0	162	0	100000	162	162	mreD	1	162	CDN83984.1	1
4821	100	99.656	1189	0	0	582	2	99656	582	582	msbA	1	582	MTT18598.1	1
4822	100	99.656	1189	0	0	582	2	99656	582	582	msbA	1	582	OLR36964.1	1
4823	100	99.656	1189	0	0	582	2	99656	582	582	msbA	1	582	CDN81387.1	1
4824	99.3127	30.623	253	1.05e-76	8	578	373	30623	582	579	msbA	13	571	MTT19078.1	11
4825	99.3127	30.623	253	1.05e-76	8	578	373	30623	582	579	msbA	13	571	OLR37817.1	11
4826	99.3127	30.623	253	1.05e-76	8	578	373	30623	582	579	msbA	13	571	CDN80838.1	11
4827	100.344	29.281	249	3.29e-75	8	584	392	29281	582	581	msbA	11	577	MTT19077.1	2
4828	100.344	29.281	249	3.29e-75	8	584	392	29281	582	581	msbA	11	577	OLR37816.1	2
4829	100.344	29.281	249	3.29e-75	8	584	392	29281	582	581	msbA	11	577	CDN80839.1	2
4830	41.4089	47.718	224	4.78e-66	1	241	125	47718	582	581	msbA	341	582	MTT21686.1	343
4831	41.4089	47.718	224	4.78e-66	1	241	125	47718	582	581	msbA	341	582	OLR32759.1	343
4832	41.4089	47.718	224	4.78e-66	1	241	125	47718	582	581	msbA	341	582	CDN82598.1	343
4833	92.9553	29.575	214	1.53e-62	10	541	338	29575	582	577	msbA	59	547	OLR32760.1	28
4834	92.9553	29.575	214	1.53e-62	10	541	338	29575	582	577	msbA	59	547	CDN82599.1	28
4835	100.344	29.452	214	3.87e-62	11	584	368	29452	582	577	msbA	16	577	MTT21685.1	16
4836	85.3952	29.175	201	1.46e-57	10	497	323	29175	582	577	msbA	95	571	MTT20074.1	90
4837	85.3952	29.175	201	1.46e-57	10	497	323	29175	582	577	msbA	95	571	OLR37422.1	90
4838	85.3952	29.175	201	1.46e-57	10	497	323	29175	582	577	msbA	95	571	CDN81252.1	90
4839	74.2268	26.852	154	1.46e-40	9	432	295	26852	582	575	msbA	158	580	MTT20073.1	156
4840	74.2268	26.852	154	1.46e-40	9	432	295	26852	582	575	msbA	158	580	OLR37421.1	156
4841	74.2268	26.852	154	1.46e-40	9	432	295	26852	582	575	msbA	158	580	CDN81253.1	156
4842	41.7526	31.276	106	3.42e-26	8	243	152	31276	582	566	msbA	334	240	MTT21081.1	3
4843	41.7526	31.276	106	3.42e-26	8	243	152	31276	582	566	msbA	334	240	OLR35758.1	3
4844	41.7526	31.276	106	3.42e-26	8	243	152	31276	582	566	msbA	334	240	CDN84558.1	3
4845	40.7216	30.802	107	9.33e-26	8	237	147	30802	582	568	msbA	342	231	MTT21158.1	2
4846	40.7216	30.802	107	9.33e-26	8	237	147	30802	582	568	msbA	342	231	OLR36849.1	2
4847	40.7216	30.802	107	9.33e-26	8	237	147	30802	582	568	msbA	342	231	CDN80591.1	2
4848	40.5498	30.932	101	2.02e-24	7	236	137	30932	582	566	msbA	344	236	MTT21206.1	14
4849	40.5498	30.932	101	2.02e-24	7	236	137	30932	582	566	msbA	344	236	OLR36802.1	14
4850	40.5498	30.932	101	2.02e-24	7	236	137	30932	582	566	msbA	344	236	CDN80540.1	14
4851	38.8316	31.416	98.6	1.11e-23	8	226	139	31416	582	560	msbA	342	218	MTT20150.1	2
4852	38.8316	31.416	98.6	1.11e-23	8	226	139	31416	582	560	msbA	342	218	OLR37496.1	2
4853	38.8316	31.416	98.6	1.11e-23	8	226	139	31416	582	560	msbA	342	218	CDN81176.1	2
4854	38.1443	32.432	97.8	2.74e-23	9	222	126	32432	582	568	msbA	359	237	MTT21251.1	28
4855	38.1443	32.432	97.8	2.74e-23	9	222	126	32432	582	568	msbA	359	237	OLR34682.1	28
4856	38.1443	32.432	97.8	2.74e-23	9	222	126	32432	582	568	msbA	359	237	CDN84016.1	28
4857	39.8625	33.621	94.4	3.1e-22	9	232	132	33621	582	566	msbA	342	218	MTT18860.1	2
4858	39.8625	33.621	94.4	3.1e-22	9	232	132	33621	582	566	msbA	342	218	OLR36707.1	2
4859	39.8625	33.621	94	4.26e-22	9	232	132	33621	582	566	msbA	342	225	CDN80442.1	9
4860	40.0344	30.472	95.5	4.48e-22	8	233	147	30472	582	568	msbA	342	225	MTT17631.1	2
4861	40.0344	30.472	95.5	4.48e-22	8	233	147	30472	582	568	msbA	342	225	OLR36006.1	2
4862	40.0344	30.472	95.5	4.48e-22	8	233	147	30472	582	568	msbA	342	225	CDN82807.1	2
4863	35.3952	34.466	93.6	5.81e-22	7	206	120	34466	582	554	msbA	355	218	MTT22225.1	22
4864	35.3952	34.466	93.6	5.81e-22	7	206	120	34466	582	554	msbA	355	218	OLR29021.1	22
4865	35.3952	34.466	93.6	5.81e-22	7	206	120	34466	582	554	msbA	355	218	CDN85442.1	22
4866	40.8935	30.252	94	1.55e-21	7	238	152	30252	582	579	msbA	342	228	MTT21235.1	5
4867	40.8935	30.252	94	1.55e-21	7	238	152	30252	582	579	msbA	342	228	OLR36774.1	5
4868	40.8935	30.252	94	1.55e-21	7	238	152	30252	582	579	msbA	342	228	CDN80510.1	5
4869	36.0825	30.952	92.4	1.08e-20	8	210	131	30952	582	560	msbA	356	217	MTT20911.1	17
4870	36.0825	30.952	92.4	1.08e-20	8	210	131	30952	582	560	msbA	356	217	OLR35239.1	17
4871	36.0825	30.952	92.4	1.08e-20	8	210	131	30952	582	560	msbA	356	217	CDN81930.1	17
4872	41.4089	29.876	91.3	1.79e-20	7	241	139	29876	582	574	msbA	352	259	MTT19778.1	31
4873	41.4089	29.876	91.3	1.79e-20	7	241	139	29876	582	574	msbA	352	259	OLR35948.1	31
4874	41.4089	29.876	91.3	1.79e-20	7	241	139	29876	582	574	msbA	352	259	CDN84296.1	31
4875	38.488	31.25	93.6	2.39e-20	8	224	140	31250	582	557	msbA	342	222	MTT20080.1	5
4876	38.488	31.25	93.6	2.39e-20	8	224	140	31250	582	557	msbA	342	222	OLR37428.1	5
4877	38.488	31.25	93.6	2.39e-20	8	224	140	31250	582	557	msbA	342	222	CDN81246.1	5
4878	35.0515	29.412	88.2	4.13e-20	4	204	135	29412	582	552	msbA	351	211	MTT19034.1	15
4879	35.0515	29.412	88.2	4.13e-20	4	204	135	29412	582	552	msbA	351	211	OLR37773.1	15
4880	35.0515	29.412	88.2	4.13e-20	4	204	135	29412	582	552	msbA	351	211	CDN80884.1	15
4881	37.6289	34.247	90.5	4.73e-20	7	219	134	34247	582	556	msbA	342	215	MTT19556.1	3
4882	37.6289	34.247	90.5	4.73e-20	7	219	134	34247	582	556	msbA	342	215	OLR35375.1	3
4883	37.6289	34.247	90.5	4.73e-20	7	219	134	34247	582	556	msbA	342	215	CDN83086.1	3
4884	39.1753	31.14	91.7	7.43e-20	10	228	137	31140	582	559	msbA	342	235	MTT20651.1	18
4886	39.1753	31.14	91.7	7.43e-20	10	228	137	31140	582	559	msbA	342	235	OLR37714.1	18
4888	39.1753	31.14	91.7	7.43e-20	10	228	137	31140	582	559	msbA	342	235	CDN80947.1	18
4890	36.4261	31.604	87.8	1.16e-19	6	212	126	31604	582	558	msbA	359	232	MTT19369.1	28
4891	36.4261	31.604	87.8	1.16e-19	6	212	126	31604	582	558	msbA	359	232	OLR32855.1	28
4892	36.4261	31.604	87.8	1.16e-19	6	212	126	31604	582	558	msbA	359	232	CDN84219.1	28
4893	37.6289	31.963	89	2.41e-19	6	219	135	31963	582	568	msbA	358	255	MTT19707.1	43
4894	37.6289	31.963	89	2.41e-19	6	219	135	31963	582	568	msbA	358	255	OLR31826.1	43
4895	37.6289	31.963	89	2.41e-19	6	219	135	31963	582	568	msbA	358	255	CDN83277.1	43
4896	39.1753	28.07	86.3	2.68e-19	8	228	149	28070	582	566	msbA	346	226	MTT22255.1	7
4897	39.1753	28.07	86.3	2.68e-19	8	228	149	28070	582	566	msbA	346	226	OLR29160.1	7
4898	39.1753	28.07	86.3	2.68e-19	8	228	149	28070	582	566	msbA	346	226	CDN85185.1	7
4899	41.2371	27.5	86.3	2.78e-19	7	240	154	27500	582	571	msbA	342	231	MTT19402.1	2
4900	41.2371	27.5	86.3	2.78e-19	7	240	154	27500	582	571	msbA	342	231	OLR32822.1	2
4901	40.378	28.085	85.9	4.88e-19	7	235	149	28085	582	566	msbA	342	236	CDN84257.1	12
4902	32.646	32.632	85.1	5.28e-19	7	190	116	32632	582	558	msbA	375	216	MTT20723.1	33
4903	32.646	32.632	85.1	5.28e-19	7	190	116	32632	582	558	msbA	375	216	OLR37642.1	33
4904	32.646	32.632	85.1	5.28e-19	7	190	116	32632	582	558	msbA	375	216	CDN81023.1	33
4905	39.6907	29.87	87	9.05e-19	8	231	148	29870	582	568	msbA	342	240	MTT20104.1	20
4906	39.6907	29.87	87	9.05e-19	8	231	148	29870	582	568	msbA	342	240	OLR37451.1	20
4907	40.5498	31.356	84.7	9.56e-19	7	236	144	31356	582	566	msbA	342	232	MTT20465.1	4
4908	40.5498	31.356	84.7	9.56e-19	7	236	144	31356	582	566	msbA	342	232	OLR34220.1	4
4909	40.5498	31.356	84.7	9.56e-19	7	236	144	31356	582	566	msbA	342	232	CDN82478.1	4
4910	40.0344	31.33	87	9.65e-19	9	233	142	31330	582	568	msbA	342	238	MTT18787.1	18
4911	40.0344	31.33	87	9.65e-19	9	233	142	31330	582	568	msbA	342	238	OLR37147.1	18
4912	40.0344	31.33	87	9.65e-19	9	233	142	31330	582	568	msbA	342	238	CDN81584.1	18
4913	36.7698	31.776	84.3	1.05e-18	7	214	128	31776	582	560	msbA	358	223	MTT20095.1	17
4914	36.7698	31.776	84.3	1.05e-18	7	214	128	31776	582	560	msbA	358	223	OLR37442.1	17
4915	36.7698	31.776	84.7	1.57e-18	7	214	128	31776	582	560	msbA	358	256	CDN81230.1	50
4916	39.6907	29.87	86.3	1.84e-18	8	231	148	29870	582	568	msbA	342	267	CDN81221.1	47
4917	41.5808	31.405	87	1.98e-18	8	242	151	31405	582	568	msbA	334	248	CDN82403.1	15
4919	37.1134	28.704	83.2	4.3e-18	6	216	136	28704	582	566	msbA	361	232	MTT20664.1	25
4920	37.1134	28.704	83.2	4.3e-18	6	216	136	28704	582	566	msbA	361	232	OLR37701.1	25
4921	37.1134	28.704	83.2	4.3e-18	6	216	136	28704	582	566	msbA	361	232	CDN80961.1	25
4922	39.1753	31.579	84	5.65e-18	7	228	142	31579	582	565	msbA	342	222	MTT21550.1	5
4923	39.1753	31.579	84	5.65e-18	7	228	142	31579	582	565	msbA	342	222	OLR35306.1	5
4924	39.1753	31.579	84	5.65e-18	7	228	142	31579	582	565	msbA	342	222	CDN81999.1	5
4925	41.4089	31.12	85.5	6.36e-18	8	241	151	31120	582	568	msbA	335	233	MTT20393.1	1
4927	41.4089	31.12	85.5	6.36e-18	8	241	151	31120	582	568	msbA	335	233	OLR34149.1	1
4929	34.7079	30.693	80.9	1.81e-17	5	202	119	30693	582	556	msbA	359	211	MTT18617.1	27
4930	34.7079	30.693	80.9	1.81e-17	5	202	119	30693	582	556	msbA	359	211	OLR36983.1	27
4931	34.7079	30.693	80.9	1.81e-17	5	202	119	30693	582	556	msbA	359	211	CDN81406.1	27
4932	39.3471	30.131	82.4	2.6e-17	9	229	134	30131	582	560	msbA	342	214	MTT22121.1	2
4933	37.457	31.193	82.8	4.76e-17	7	218	123	31193	582	560	msbA	359	508	MTT17682.1	302
4934	38.6598	33.778	76.6	3.79e-15	8	225	110	33778	582	559	msbA	361	238	MTT17682.1	27
4935	37.457	31.193	82.8	4.76e-17	7	218	123	31193	582	560	msbA	359	508	OLR36057.1	302
4936	38.6598	33.778	76.6	3.79e-15	8	225	110	33778	582	559	msbA	361	238	OLR36057.1	27
4937	37.457	31.193	82.8	4.76e-17	7	218	123	31193	582	560	msbA	359	508	CDN82859.1	302
4938	38.6598	33.778	76.6	3.79e-15	8	225	110	33778	582	559	msbA	361	238	CDN82859.1	27
4939	41.0653	29.289	83.2	5.49e-17	10	239	155	29289	582	570	msbA	336	498	CDN84230.1	270
[truncated: 752 more rows]

## Sheet: Under cut-off
	% alignment	% id	bitscore	evalue	gapopen	length	mismatch	pident	prot length	qend	qseqid	qstart	send	sseqid	sstart
3	13.7931	31.818	29.3	1.5	0	44	30	31818	319	188	accA	145	220	CDN83440.1	177
4	17.5549	37.5	28.9	1.7	0	56	35	37500	319	232	accA	177	119	OLR35577.1	64
5	17.5549	37.5	28.9	1.8	0	56	35	37500	319	232	accA	177	119	MTT20214.1	64
6	17.5549	37.5	28.9	1.8	0	56	35	37500	319	232	accA	177	119	CDN83711.1	64
7	13.4796	32.558	26.9	3.5	1	43	26	32558	319	61	accA	19	101	MTT18321.1	62
8	13.4796	32.558	26.9	3.5	1	43	26	32558	319	61	accA	19	101	OLR34869.1	62
9	13.4796	32.558	26.9	3.5	1	43	26	32558	319	61	accA	19	101	CDN82219.1	62
10	13.7931	31.818	27.7	3.6	1	44	26	31818	319	318	accA	275	128	MTT19631.1	89
11	13.7931	31.818	27.7	3.6	1	44	26	31818	319	318	accA	275	128	OLR34602.1	89
12	13.7931	31.818	27.7	3.6	1	44	26	31818	319	318	accA	275	128	CDN83357.1	89
13	17.2414	34.545	26.6	7.8	3	55	26	34545	319	106	accA	55	159	MTT18613.1	112
14	17.2414	34.545	26.6	7.8	3	55	26	34545	319	106	accA	55	159	OLR36979.1	112
15	17.2414	34.545	26.6	7.8	3	55	26	34545	319	106	accA	55	159	CDN81402.1	112
16	34.1693	26.606	26.6	8.4	2	109	76	26606	319	272	accA	166	181	MTT21234.1	75
17	34.1693	26.606	26.6	8.4	2	109	76	26606	319	272	accA	166	181	OLR36775.1	75
18	34.1693	26.606	26.6	8.4	2	109	76	26606	319	272	accA	166	181	CDN80511.1	75
22	37.8205	37.288	31.6	0.064	3	59	24	37288	156	59	accB	1	862	MTT19974.1	817
23	37.8205	37.288	31.6	0.064	3	59	24	37288	156	59	accB	1	862	OLR35098.1	817
24	37.8205	37.288	31.6	0.064	3	59	24	37288	156	59	accB	1	862	CDN83522.1	817
25	31.4103	26.531	26.9	1.8	0	49	36	26531	156	104	accB	56	189	MTT22479.1	141
26	32.6923	29.412	26.9	1.9	1	51	35	29412	156	150	accB	100	124	MTT19409.1	75
27	32.6923	29.412	26.9	1.9	1	51	35	29412	156	150	accB	100	124	OLR32816.1	75
28	32.6923	29.412	26.9	1.9	1	51	35	29412	156	150	accB	100	124	CDN84264.1	75
29	35.2564	34.545	26.6	2.9	0	55	36	34545	156	156	accB	102	178	MTT21247.1	124
30	35.2564	34.545	26.6	2.9	0	55	36	34545	156	156	accB	102	178	OLR36762.1	124
31	35.2564	34.545	26.6	2.9	0	55	36	34545	156	156	accB	102	178	CDN80498.1	124
32	22.4359	37.143	25.4	4.4	0	35	22	37143	156	138	accB	104	81	MTT19973.1	47
33	22.4359	37.143	25.4	4.4	0	35	22	37143	156	138	accB	104	81	OLR35099.1	47
34	23.0769	36.111	26.2	4.5	0	36	23	36111	156	68	accB	33	277	CDN81827.1	242
35	22.4359	37.143	25.4	4.7	0	35	22	37143	156	138	accB	104	82	CDN83523.1	48
36	19.2308	56.667	25.8	5.2	1	30	12	56667	156	65	accB	36	450	MTT20070.1	422
37	19.2308	56.667	25.8	5.2	1	30	12	56667	156	65	accB	36	450	OLR37419.1	422
38	19.2308	56.667	25.8	5.2	1	30	12	56667	156	65	accB	36	450	CDN81256.1	422
39	37.1795	27.586	25.8	5.3	1	58	30	27586	156	75	accB	30	161	MTT18044.1	104
40	37.1795	27.586	25.8	5.3	1	58	30	27586	156	75	accB	30	161	OLR36374.1	104
41	37.1795	27.586	25.8	5.3	1	58	30	27586	156	75	accB	30	161	CDN85018.1	104
46	54.5657	24.082	46.2	1.26e-05	6	245	164	24082	449	321	accC	90	332	MTT18898.1	97
48	54.5657	24.082	46.2	1.26e-05	6	245	164	24082	449	321	accC	90	332	OLR36670.1	97
50	54.5657	24.082	46.2	1.26e-05	6	245	164	24082	449	321	accC	90	332	CDN80402.1	97
51	50.5568	24.229	43.5	4.64e-05	10	227	148	24229	449	291	accC	76	273	MTT18834.1	60
52	50.5568	24.229	43.5	4.64e-05	10	227	148	24229	449	291	accC	76	273	OLR36732.1	60
53	50.5568	24.229	43.5	4.64e-05	10	227	148	24229	449	291	accC	76	273	CDN80468.1	60
54	40.0891	21.667	33.1	0.13	5	180	123	21667	449	181	accC	4	177	MTT18191.1	14
55	40.0891	21.667	33.1	0.13	5	180	123	21667	449	181	accC	4	177	OLR35001.1	14
56	40.0891	21.667	33.1	0.13	5	180	123	21667	449	181	accC	4	177	CDN82352.1	14
57	28.9532	25.385	32.7	0.21	5	130	78	25385	449	340	accC	214	743	MTT21449.1	630
58	28.9532	25.385	32.7	0.21	5	130	78	25385	449	340	accC	214	743	OLR37568.1	630
59	28.9532	25.385	32.7	0.21	5	130	78	25385	449	340	accC	214	743	CDN81100.1	630
60	40.0891	22.222	31.6	0.43	6	180	106	22222	449	259	accC	98	250	MTT21921.1	87
61	40.0891	22.222	31.6	0.43	6	180	106	22222	449	259	accC	98	250	OLR30018.1	87
62	40.0891	22.222	31.6	0.43	6	180	106	22222	449	259	accC	98	250	CDN84843.1	87
63	11.3586	37.255	27.7	5.8	0	51	32	37255	449	54	accC	4	221	MTT18265.1	171
64	11.3586	37.255	27.7	5.8	0	51	32	37255	449	54	accC	4	221	OLR34928.1	171
65	11.3586	37.255	27.7	5.8	0	51	32	37255	449	54	accC	4	221	CDN82278.1	171
69	16.7763	39.216	30	0.46	1	51	27	39216	304	289	accD	243	67	MTT19927.1	17
70	16.7763	39.216	30	0.46	1	51	27	39216	304	289	accD	243	67	OLR35143.1	17
71	16.7763	39.216	29.6	0.69	1	51	27	39216	304	289	accD	243	91	CDN83570.1	41
72	25	30.263	28.1	2.7	2	76	42	30263	304	245	accD	175	409	MTT17853.1	340
73	25	30.263	28.1	2.7	2	76	42	30263	304	245	accD	175	409	OLR30449.1	340
74	25	30.263	28.1	2.7	2	76	42	30263	304	245	accD	175	409	CDN83038.1	340
75	19.7368	26.667	26.9	6.2	1	60	31	26667	304	252	accD	193	128	MTT20608.1	82
76	19.7368	26.667	26.9	6.2	1	60	31	26667	304	252	accD	193	128	OLR34372.1	82
77	19.7368	26.667	26.9	6.2	1	60	31	26667	304	252	accD	193	128	CDN84715.1	82
78	19.4079	28.814	26.9	6.9	1	59	41	28814	304	198	accD	141	330	MTT18841.1	272
79	19.4079	28.814	26.9	6.9	1	59	41	28814	304	198	accD	141	330	OLR36725.1	272
80	19.4079	28.814	26.9	6.9	1	59	41	28814	304	198	accD	141	330	CDN80461.1	272
85	16.8254	27.358	35	0.051	1	106	75	27358	630	210	aceF	107	110	MTT21454.1	5
86	17.4603	24.545	31.2	0.81	2	110	80	24545	630	109	aceF	2	111	MTT21454.1	3
88	16.8254	27.358	35	0.051	1	106	75	27358	630	210	aceF	107	110	OLR37572.1	5
89	17.4603	24.545	31.2	0.81	2	110	80	24545	630	109	aceF	2	111	OLR37572.1	3
91	16.8254	27.358	35	0.051	1	106	75	27358	630	210	aceF	107	110	CDN81095.1	5
92	17.4603	24.545	31.2	0.81	2	110	80	24545	630	109	aceF	2	111	CDN81095.1	3
94	11.2698	29.577	33.9	0.096	1	71	48	29577	630	71	aceF	3	72	MTT17941.1	2
95	7.46032	31.915	32.7	0.24	0	47	32	31915	630	174	aceF	128	72	MTT17941.1	26
97	11.2698	29.577	33.9	0.096	1	71	48	29577	630	71	aceF	3	72	OLR36474.1	2
98	7.46032	31.915	32.7	0.24	0	47	32	31915	630	174	aceF	128	72	OLR36474.1	26
100	11.2698	29.577	33.9	0.096	1	71	48	29577	630	71	aceF	3	72	CDN84907.1	2
101	7.46032	31.915	32.7	0.24	0	47	32	31915	630	174	aceF	128	72	CDN84907.1	26
102	23.8095	26	38.9	0.002	4	150	92	26000	630	272	aceF	130	176	MTT18391.1	39
103	23.8095	26	38.9	0.002	4	150	92	26000	630	272	aceF	130	176	OLR34499.1	39
104	23.8095	26	38.9	0.003	4	150	92	26000	630	272	aceF	130	190	CDN82148.1	53
105	8.73016	34.545	28.5	3.3	0	55	36	34545	630	178	aceF	124	156	MTT21275.1	102
106	8.73016	34.545	28.5	3.3	0	55	36	34545	630	178	aceF	124	156	OLR34706.1	102
107	8.73016	34.545	28.5	3.3	0	55	36	34545	630	178	aceF	124	156	CDN83992.1	102
108	4.28571	40.741	25.8	8.2	0	27	16	40741	630	373	aceF	347	45	MTT18458.1	19
109	4.28571	40.741	25.8	8.2	0	27	16	40741	630	373	aceF	347	45	OLR34435.1	19
110	4.28571	40.741	25.8	8.2	0	27	16	40741	630	373	aceF	347	45	CDN82076.1	19
114	44.8718	42.857	36.6	4.19e-05	0	35	20	42857	78	56	acpP	22	58	CDN83716.1	24
115	44.8718	40	34.7	0.000314	0	35	21	40000	78	56	acpP	22	58	MTT20219.1	24
116	44.8718	40	34.7	0.000314	0	35	21	40000	78	56	acpP	22	58	OLR35582.1	24
117	51.2821	37.5	23.5	7.4	1	40	19	37500	78	42	acpP	9	210	MTT20268.1	171
118	51.2821	37.5	23.5	7.4	1	40	19	37500	78	42	acpP	9	210	OLR35632.1	171
119	51.2821	37.5	23.5	7.4	1	40	19	37500	78	42	acpP	9	210	CDN83766.1	171
120	64.1026	30	23.1	9.5	1	50	33	30000	78	51	acpP	4	103	MTT22343.1	54
124	51.5873	24.615	25	5.4	0	65	49	24615	126	113	acpS	49	269	MTT18760.1	205
125	51.5873	24.615	25	5.4	0	65	49	24615	126	113	acpS	49	269	OLR37122.1	205
126	51.5873	24.615	25	5.4	0	65	49	24615	126	113	acpS	49	269	CDN81556.1	205
127	18.254	52.174	24.6	6.9	0	23	11	52174	126	115	acpS	93	30	MTT18043.1	8
128	18.254	52.174	24.6	6.9	0	23	11	52174	126	115	acpS	93	30	OLR36375.1	8
129	18.254	52.174	24.6	7.3	0	23	11	52174	126	115	acpS	93	38	CDN85017.1	16
133	21.9626	40.426	33.9	0.014	1	47	25	40426	214	45	adk	2	50	OLR32102.1	4
134	37.8505	28.395	31.6	0.07	2	81	52	28395	214	119	adk	45	104	MTT21713.1	24
135	37.8505	28.395	31.6	0.07	2	81	52	28395	214	119	adk	45	104	OLR34808.1	24
136	37.8505	28.395	31.6	0.07	2	81	52	28395	214	119	adk	45	104	CDN83884.1	24
137	36.9159	29.114	28.9	0.94	2	79	44	29114	214	70	adk	4	674	MTT20531.1	596
138	36.9159	29.114	28.9	0.94	2	79	44	29114	214	70	adk	4	674	OLR34293.1	596
139	36.9159	29.114	28.9	0.94	2	79	44	29114	214	70	adk	4	674	CDN84801.1	596
140	32.7103	31.429	27.3	2.2	3	70	38	31429	214	63	adk	3	169	MTT22087.1	101
141	29.9065	29.688	26.9	3.4	2	64	41	29688	214	63	adk	3	115	MTT20068.1	53
142	29.9065	29.688	26.9	3.4	2	64	41	29688	214	63	adk	3	115	OLR37417.1	53
143	29.9065	29.688	26.9	3.4	2	64	41	29688	214	63	adk	3	115	CDN81258.1	53
144	14.486	38.71	26.2	5.7	0	31	19	38710	214	181	adk	151	159	MTT20516.1	129
145	14.486	38.71	26.2	5.7	0	31	19	38710	214	181	adk	151	159	OLR34268.1	129
146	14.486	38.71	26.2	5.7	0	31	19	38710	214	181	adk	151	159	CDN82529.1	129
150	14.8402	25.385	30	2.3	4	130	62	25385	876	703	alaS	603	274	MTT21464.1	151
151	14.8402	25.385	30	2.3	4	130	62	25385	876	703	alaS	603	274	OLR37582.1	151
152	14.8402	25.385	30	2.3	4	130	62	25385	876	703	alaS	603	274	CDN81084.1	151
153	5.59361	34.694	30	2.7	3	49	16	34694	876	172	alaS	137	254	MTT21060.1	209
154	5.59361	34.694	30	2.7	3	49	16	34694	876	172	alaS	137	254	OLR35974.1	209
155	5.59361	34.694	30	2.7	3	49	16	34694	876	172	alaS	137	262	CDN84579.1	217
156	4.3379	39.474	28.5	7	1	38	20	39474	876	258	alaS	224	326	MTT19482.1	289
157	4.3379	39.474	28.5	7	1	38	20	39474	876	258	alaS	224	326	OLR35446.1	289
158	4.3379	39.474	28.5	7	1	38	20	39474	876	258	alaS	224	326	CDN83161.1	289
162	5.89255	35.294	30.4	1.4	0	34	22	35294	577	155	argS	122	75	MTT20715.1	42
163	5.89255	35.294	30.4	1.4	0	34	22	35294	577	155	argS	122	75	OLR37650.1	42
164	5.89255	35.294	30.4	1.5	0	34	22	35294	577	155	argS	122	122	CDN81014.1	89
165	5.71924	36.364	29.6	2.2	0	33	21	36364	577	161	argS	129	69	MTT21912.1	37
166	5.71924	36.364	29.6	2.2	0	33	21	36364	577	161	argS	129	69	OLR37742.1	37
167	5.71924	36.364	29.6	2.2	0	33	21	36364	577	161	argS	129	69	CDN80918.1	37
168	20.104	25.862	28.9	3.8	4	116	74	25862	577	362	argS	250	366	CDN84982.1	260
169	20.104	25.862	28.9	3.8	4	116	74	25862	577	362	argS	250	363	MTT18014.1	257
170	20.104	25.862	28.9	3.8	4	116	74	25862	577	362	argS	250	363	OLR36536.1	257
171	14.7314	23.529	28.5	4.9	1	85	61	23529	577	376	argS	296	249	MTT19455.1	165
172	14.7314	23.529	28.5	4.9	1	85	61	23529	577	376	argS	296	249	OLR35472.1	165
173	14.7314	23.529	28.5	4.9	1	85	61	23529	577	376	argS	296	249	CDN83190.1	165
174	11.2652	27.692	28.1	6.5	0	65	47	27692	577	489	argS	425	301	MTT20182.1	237
175	11.2652	27.692	28.1	6.5	0	65	47	27692	577	489	argS	425	301	OLR37528.1	237
176	11.2652	27.692	28.1	6.5	0	65	47	27692	577	489	argS	425	301	CDN81142.1	237
177	12.6516	27.397	27.7	8.7	2	73	51	27397	577	101	argS	30	575	MTT18077.1	504
178	12.6516	27.397	27.7	8.7	2	73	51	27397	577	101	argS	30	575	OLR36343.1	504
179	12.6516	27.397	27.7	8.8	2	73	51	27397	577	101	argS	30	576	CDN85050.1	505
183	97.2752	22.129	43.9	3.5e-05	11	357	234	22129	367	356	asd	3	321	MTT17813.1	6
184	97.2752	22.129	43.9	3.5e-05	11	357	234	22129	367	356	asd	3	321	OLR36191.1	6
185	97.2752	22.129	43.9	3.5e-05	11	357	234	22129	367	356	asd	3	321	CDN82996.1	6
186	14.9864	29.091	30.4	0.44	1	55	37	29091	367	188	asd	134	68	CDN82409.1	16
187	14.9864	29.091	30	0.45	1	55	37	29091	367	188	asd	134	63	MTT20399.1	11
188	14.9864	29.091	30	0.45	1	55	37	29091	367	188	asd	134	63	OLR34155.1	11
189	13.8965	37.255	27.7	4.7	2	51	20	37255	367	259	asd	216	172	CDN83542.1	127
190	13.8965	37.255	27.3	5.2	2	51	20	37255	367	259	asd	216	144	MTT19954.1	99
191	13.8965	37.255	27.3	5.2	2	51	20	37255	367	259	asd	216	144	OLR35114.1	99
192	30.5177	25	26.6	9.4	4	112	62	25000	367	235	asd	141	205	MTT19279.1	99
193	30.5177	25	26.6	9.4	4	112	62	25000	367	235	asd	141	205	OLR33666.1	99
194	30.5177	25	26.6	9.4	4	112	62	25000	367	235	asd	141	205	CDN84125.1	99
195	23.7057	27.586	26.9	9.9	3	87	53	27586	367	215	asd	131	207	MTT20038.1	129
196	23.7057	27.586	26.9	9.9	3	87	53	27586	367	215	asd	131	207	OLR35034.1	129
197	23.7057	27.586	26.9	10	3	87	53	27586	367	215	asd	131	210	CDN83458.1	132
208	59.8712	22.939	48.1	2.97e-06	11	279	165	22939	466	277	asnS	16	259	MTT20364.1	14
210	59.8712	22.939	48.1	2.97e-06	11	279	165	22939	466	277	asnS	16	259	OLR30142.1	14
212	59.8712	22.939	48.1	2.97e-06	11	279	165	22939	466	277	asnS	16	259	CDN82373.1	14
213	18.4549	29.07	28.9	2.1	4	86	45	29070	466	83	asnS	5	133	MTT18604.1	57
214	18.4549	29.07	28.9	2.1	4	86	45	29070	466	83	asnS	5	133	OLR36970.1	57
215	18.4549	29.07	28.9	2.1	4	86	45	29070	466	83	asnS	5	133	CDN81393.1	57
216	10.0858	27.66	27.3	3.9	1	47	33	27660	466	148	asnS	103	56	MTT22378.1	10
217	10.0858	27.66	26.9	4.4	1	47	33	27660	466	148	asnS	103	56	MTT22502.1	10
218	4.72103	54.545	27.3	6	0	22	10	54545	466	180	asnS	159	178	MTT21373.1	157
219	4.72103	54.545	27.3	6	0	22	10	54545	466	180	asnS	159	178	OLR33557.1	157
220	4.72103	54.545	27.3	6	0	22	10	54545	466	180	asnS	159	178	CDN82714.1	157
221	10.0858	27.66	26.9	7.1	1	47	33	27660	466	148	asnS	103	56	MTT22169.1	10
226	24.9153	26.531	57.4	5.49e-09	3	147	103	26531	590	555	aspS	413	499	MTT19986.1	354
228	24.9153	26.531	57.4	5.49e-09	3	147	103	26531	590	555	aspS	413	499	OLR35087.1	354
230	24.9153	26.531	57.4	5.49e-09	3	147	103	26531	590	555	aspS	413	499	CDN83510.1	354
238	47.2881	22.581	46.6	1.09e-05	11	279	166	22581	590	259	aspS	14	277	MTT18614.1	16
240	47.2881	22.581	46.6	1.09e-05	11	279	166	22581	590	259	aspS	14	277	OLR36980.1	16
242	47.2881	22.581	46.6	1.09e-05	11	279	166	22581	590	259	aspS	14	277	CDN81403.1	16
243	17.4576	31.068	52.8	7.89e-08	2	103	62	31068	590	233	aspS	138	116	MTT18065.1	16
244	16.2712	30.208	45.1	2.97e-05	2	96	55	30208	590	554	aspS	467	320	MTT18065.1	229
245	17.4576	31.068	52.8	7.89e-08	2	103	62	31068	590	233	aspS	138	116	OLR36353.1	16
246	16.2712	30.208	45.1	2.97e-05	2	96	55	30208	590	554	aspS	467	320	OLR36353.1	229
247	17.4576	31.068	52.8	7.89e-08	2	103	62	31068	590	233	aspS	138	116	CDN85039.1	16
248	16.2712	30.208	45.1	2.97e-05	2	96	55	30208	590	554	aspS	467	320	CDN85039.1	229
249	14.9153	27.273	30	1.3	3	88	57	27273	590	217	aspS	135	198	MTT18018.1	113
250	14.9153	27.273	30	1.3	3	88	57	27273	590	217	aspS	135	198	OLR36400.1	113
251	14.9153	27.273	30	1.3	3	88	57	27273	590	217	aspS	135	198	CDN84986.1	113
252	16.4407	31.959	29.3	2.5	4	97	44	31959	590	367	aspS	278	132	MTT21883.1	51
253	16.4407	31.959	29.3	2.5	4	97	44	31959	590	367	aspS	278	132	OLR30504.1	51
254	16.4407	31.959	29.3	2.5	4	97	44	31959	590	367	aspS	278	132	CDN85245.1	51
255	7.9661	36.17	28.1	6.4	1	47	21	36170	590	200	aspS	154	101	MTT22156.1	64
259	60	20.782	34.3	0.11	21	486	274	20782	810	807	bamA	339	572	MTT18134.1	181
260	60	20.782	34.3	0.11	21	486	274	20782	810	807	bamA	339	572	OLR36287.1	181
261	60	20.782	34.3	0.11	21	486	274	20782	810	807	bamA	339	572	CDN85107.1	181
262	11.8519	32.292	30	1.3	6	96	45	32292	810	284	bamA	200	174	MTT21321.1	88
263	11.8519	32.292	30	1.3	6	96	45	32292	810	284	bamA	200	174	OLR34750.1	88
264	11.8519	32.292	30	1.3	6	96	45	32292	810	284	bamA	200	174	CDN83943.1	88
265	6.66667	33.333	30	2.9	1	54	34	33333	810	222	bamA	171	110	MTT20460.1	57
266	6.66667	33.333	30	2.9	1	54	34	33333	810	222	bamA	171	110	OLR34215.1	57
267	6.66667	33.333	30	2.9	1	54	34	33333	810	222	bamA	171	110	CDN82473.1	57
271	11.4286	42.857	30.8	0.21	0	28	16	42857	245	28	bamD	1	29	CDN81563.1	2
272	11.4286	42.857	30.8	0.21	0	28	16	42857	245	28	bamD	1	28	MTT18766.1	1
273	11.4286	42.857	30.8	0.21	0	28	16	42857	245	28	bamD	1	28	OLR37128.1	1
274	20.4082	26	28.9	1.1	0	50	37	26000	245	118	bamD	69	324	MTT20376.1	275
275	20.4082	26	28.9	1.1	0	50	37	26000	245	118	bamD	69	324	OLR30153.1	275
276	20.4082	26	28.9	1.1	0	50	37	26000	245	118	bamD	69	324	CDN82385.1	275
277	18.3673	33.333	27.3	2.8	0	45	30	33333	245	118	bamD	74	252	CDN84387.1	208
278	18.3673	33.333	27.3	2.9	0	45	30	33333	245	118	bamD	74	249	MTT19866.1	205
279	18.3673	33.333	27.3	2.9	0	45	30	33333	245	118	bamD	74	249	OLR35858.1	205
280	22.8571	26.786	27.3	3.3	2	56	31	26786	245	74	bamD	29	116	MTT22034.1	61
281	22.8571	26.786	27.3	3.3	2	56	31	26786	245	74	bamD	29	116	OLR37181.1	61
282	22.8571	26.786	27.3	3.3	2	56	31	26786	245	74	bamD	29	116	CDN81619.1	61
283	8.16327	55	26.9	3.9	0	20	9	55000	245	190	bamD	171	205	MTT20108.1	186
284	8.16327	55	26.9	3.9	0	20	9	55000	245	190	bamD	171	205	OLR37455.1	186
285	8.16327	55	26.9	3.9	0	20	9	55000	245	190	bamD	171	205	CDN81217.1	186
286	9.38776	43.478	25	9.9	0	23	13	43478	245	25	bamD	3	24	MTT18052.1	2
287	9.38776	43.478	25	9.9	0	23	13	43478	245	25	bamD	3	24	OLR36366.1	2
291	12.4611	32.5	28.5	0.88	1	40	22	32500	321	88	birA	54	94	MTT20748.1	55
292	12.4611	32.5	28.5	0.88	1	40	22	32500	321	88	birA	54	94	OLR37307.1	55
293	12.4611	32.5	28.5	0.88	1	40	22	32500	321	88	birA	54	94	CDN81759.1	55
294	19.0031	31.148	27.7	3.4	2	61	26	31148	321	63	birA	9	71	MTT21051.1	21
295	19.0031	31.148	27.7	3.4	2	61	26	31148	321	63	birA	9	71	OLR35731.1	21
296	19.0031	31.148	27.7	3.4	2	61	26	31148	321	63	birA	9	71	CDN84588.1	21
300	33.6364	31.081	27.3	2.7	3	74	39	31081	220	73	can	1	81	MTT20239.1	19
301	33.6364	31.081	27.3	2.7	3	74	39	31081	220	73	can	1	81	OLR35601.1	19
302	33.6364	31.081	27.3	2.7	3	74	39	31081	220	73	can	1	81	CDN83736.1	19
303	16.3636	33.333	27.3	3.6	1	36	21	33333	220	57	can	25	317	MTT21017.1	282
304	16.3636	33.333	27.3	3.6	1	36	21	33333	220	57	can	25	317	OLR34072.1	282
305	16.3636	33.333	27.3	3.6	1	36	21	33333	220	57	can	25	317	CDN84620.1	282
312	9.95146	43.902	31.2	0.44	2	41	15	43902	412	145	cca	106	281	MTT19933.1	248
313	9.95146	43.902	31.2	0.44	2	41	15	43902	412	145	cca	106	281	OLR35137.1	248
314	9.95146	43.902	31.2	0.47	2	41	15	43902	412	145	cca	106	285	CDN83564.1	252
315	9.2233	36.842	28.5	3.2	0	38	24	36842	412	266	cca	229	41	MTT21262.1	4
316	9.2233	36.842	28.5	3.2	0	38	24	36842	412	266	cca	229	41	OLR34694.1	4
317	9.2233	36.842	28.5	3.2	0	38	24	36842	412	266	cca	229	41	CDN84005.1	4
318	16.9903	31.429	28.1	4.1	2	70	40	31429	412	262	cca	201	81	MTT19697.1	12
319	16.9903	31.429	28.1	4.1	2	70	40	31429	412	262	cca	201	81	OLR31836.1	12
320	16.9903	31.429	28.1	4.1	2	70	40	31429	412	262	cca	201	81	CDN83289.1	12
324	24.5614	32.857	30	0.6	2	70	39	32857	285	106	cdsA	44	245	CDN85475.1	177
325	24.5614	32.857	30	0.64	2	70	39	32857	285	106	cdsA	44	220	MTT22234.1	152
326	90.5263	22.481	29.3	1.1	15	258	151	22481	285	260	cdsA	28	666	CDN82785.1	433
327	90.5263	22.481	29.3	1.3	15	258	151	22481	285	260	cdsA	28	661	MTT17611.1	428
328	90.5263	22.481	29.3	1.3	15	258	151	22481	285	260	cdsA	28	661	OLR35985.1	428
329	31.2281	24.719	26.6	6.8	2	89	55	24719	285	206	cdsA	118	178	CDN84015.1	102
330	31.2281	24.719	26.6	6.8	2	89	55	24719	285	206	cdsA	118	177	MTT21252.1	101
331	31.2281	24.719	26.6	6.8	2	89	55	24719	285	206	cdsA	118	177	OLR34683.1	101
335	64.557	25.49	55.8	1.47e-09	5	204	127	25490	316	245	coaA	42	190	MTT19946.1	12
336	64.557	25.49	55.8	1.47e-09	5	204	127	25490	316	245	coaA	42	190	OLR35122.1	12
337	64.557	25.49	55.8	1.47e-09	5	204	127	25490	316	245	coaA	42	190	CDN83550.1	12
338	56.962	26.667	42.7	2.97e-05	6	180	114	26667	316	267	coaA	90	173	MTT21401.1	10
339	56.962	26.667	42.7	2.97e-05	6	180	114	26667	316	267	coaA	90	173	OLR33585.1	10
340	56.962	26.667	43.1	3.01e-05	6	180	114	26667	316	267	coaA	90	194	CDN82743.1	31
341	16.1392	27.451	29.6	0.97	0	51	37	27451	316	55	coaA	5	440	MTT21490.1	390
342	16.1392	27.451	29.6	0.97	0	51	37	27451	316	55	coaA	5	440	OLR37606.1	390
343	16.1392	27.451	29.6	1	0	51	37	27451	316	55	coaA	5	457	CDN81059.1	407
344	15.1899	27.083	28.1	2.7	0	48	35	27083	316	296	coaA	249	325	MTT18225.1	278
345	15.1899	27.083	28.1	2.7	0	48	35	27083	316	296	coaA	249	325	OLR34966.1	278
346	15.1899	27.083	28.1	2.7	0	48	35	27083	316	296	coaA	249	325	CDN82317.1	278
347	36.3924	25.217	28.1	3	3	115	77	25217	316	172	coaA	59	208	MTT18784.1	102
348	36.3924	25.217	28.1	3	3	115	77	25217	316	172	coaA	59	208	OLR37144.1	102
349	36.3924	25.217	28.1	3	3	115	77	25217	316	172	coaA	59	208	CDN81581.1	102
350	21.519	25	26.9	3.4	2	68	45	25000	316	258	coaA	197	107	MTT21775.1	40
351	12.3418	30.769	26.6	8.4	0	39	27	30769	316	128	coaA	90	76	MTT21081.1	38
352	12.3418	30.769	26.6	8.4	0	39	27	30769	316	128	coaA	90	76	OLR35758.1	38
353	12.3418	30.769	26.6	8.4	0	39	27	30769	316	128	coaA	90	76	CDN84558.1	38
357	68.5535	24.771	38.1	0.000144	3	109	75	24771	159	105	coaD	3	109	MTT21951.1	2
358	65.4088	23.077	30.4	0.1	3	104	67	23077	159	97	coaD	3	101	MTT21606.1	2
359	65.4088	23.077	30.4	0.1	3	104	67	23077	159	97	coaD	3	101	OLR38013.1	2
360	65.4088	23.077	30.4	0.1	3	104	67	23077	159	97	coaD	3	101	CDN80626.1	2
361	127.673	22.66	30.4	0.13	8	203	96	22660	159	150	coaD	4	202	MTT20712.1	5
362	127.673	22.66	30.4	0.13	8	203	96	22660	159	150	coaD	4	202	OLR37653.1	5
363	127.673	22.66	30.4	0.13	8	203	96	22660	159	150	coaD	4	202	CDN81011.1	5
364	33.3333	32.075	28.5	0.7	2	53	30	32075	159	59	coaD	9	119	MTT18945.1	71
365	33.3333	32.075	28.5	0.7	2	53	30	32075	159	59	coaD	9	119	OLR36623.1	71
366	33.3333	32.075	28.5	0.72	2	53	30	32075	159	59	coaD	9	126	CDN85337.1	78
367	20.7547	48.485	27.7	0.83	1	33	15	48485	159	156	coaD	126	135	MTT21507.1	103
368	20.7547	48.485	27.7	0.83	1	33	15	48485	159	156	coaD	126	135	OLR37623.1	103
369	20.7547	48.485	27.7	0.83	1	33	15	48485	159	156	coaD	126	135	CDN81043.1	103
370	35.8491	28.07	28.1	0.97	1	57	34	28070	159	51	coaD	2	396	MTT20303.1	340
371	35.8491	28.07	28.1	0.97	1	57	34	28070	159	51	coaD	2	396	OLR35669.1	340
372	35.8491	28.07	28.1	0.97	1	57	34	28070	159	51	coaD	2	396	CDN83802.1	340
373	64.1509	23.529	27.7	1.2	2	102	74	23529	159	113	coaD	12	252	MTT20693.1	155
374	64.1509	23.529	27.7	1.2	2	102	74	23529	159	113	coaD	12	252	OLR37672.1	155
375	64.1509	23.529	27.7	1.3	2	102	74	23529	159	113	coaD	12	281	CDN80990.1	184
376	57.8616	25	25.4	7.1	2	92	61	25000	159	154	coaD	65	610	MTT18040.1	525
377	57.8616	25	25.4	7.1	2	92	61	25000	159	154	coaD	65	610	OLR36378.1	525
378	57.8616	25	25.4	7.6	2	92	61	25000	159	154	coaD	65	612	CDN85014.1	527
379	31.4465	28	24.6	8.1	2	50	33	28000	159	77	coaD	29	50	MTT19385.1	3
380	31.4465	28	24.6	8.1	2	50	33	28000	159	77	coaD	29	50	OLR32840.1	3
381	31.4465	28	24.6	8.1	2	50	33	28000	159	77	coaD	29	50	CDN84237.1	3
382	21.3836	32.353	25.4	8.8	0	34	23	32353	159	139	coaD	106	106	MTT19498.1	73
383	21.3836	32.353	25.4	8.8	0	34	23	32353	159	139	coaD	106	106	OLR35431.1	73
384	21.3836	32.353	25.4	9	0	34	23	32353	159	139	coaD	106	108	CDN83144.1	75
388	25.2427	34.615	27.3	2.3	1	52	32	34615	206	103	coaE	54	57	CDN84900.1	6
389	10.6796	54.545	27.3	2.6	0	22	10	54545	206	25	coaE	4	51	MTT22255.1	30
390	10.6796	54.545	27.3	2.6	0	22	10	54545	206	25	coaE	4	51	OLR29160.1	30
391	10.6796	54.545	27.3	2.6	0	22	10	54545	206	25	coaE	4	51	CDN85185.1	30
392	16.9903	40	26.9	2.7	1	35	20	40000	206	34	coaE	1	35	OLR32102.1	1
393	13.5922	35.714	26.9	3.3	0	28	18	35714	206	31	coaE	4	30	MTT21315.1	3
394	13.5922	35.714	26.9	3.3	0	28	18	35714	206	31	coaE	4	30	OLR34744.1	3
395	13.5922	35.714	26.9	3.3	0	28	18	35714	206	31	coaE	4	30	CDN83949.1	3
396	9.2233	52.632	26.9	3.9	0	19	9	52632	206	22	coaE	4	47	MTT18608.1	29
397	9.2233	52.632	26.9	3.9	0	19	9	52632	206	22	coaE	4	47	OLR36974.1	29
398	9.2233	52.632	26.9	3.9	0	19	9	52632	206	22	coaE	4	47	CDN81397.1	29
399	10.1942	52.381	26.2	6.3	0	21	10	52381	206	25	coaE	5	254	MTT18945.1	234
400	10.1942	52.381	26.2	6.3	0	21	10	52381	206	25	coaE	5	254	OLR36623.1	234
401	10.1942	52.381	26.2	6.5	0	21	10	52381	206	25	coaE	5	261	CDN85337.1	241
402	9.2233	63.158	25.8	8.2	0	19	7	63158	206	20	coaE	2	385	MTT19077.1	367
403	9.2233	63.158	25.8	8.2	0	19	7	63158	206	20	coaE	2	385	OLR37816.1	367
404	9.2233	63.158	25.8	8.2	0	19	7	63158	206	20	coaE	2	385	CDN80839.1	367
405	54.3689	24.107	25.8	9.6	3	112	69	24107	206	134	coaE	33	353	MTT20083.1	248
406	54.3689	24.107	25.8	9.6	3	112	69	24107	206	134	coaE	33	353	OLR37431.1	248
407	54.3689	24.107	25.8	9.6	3	112	69	24107	206	134	coaE	33	353	CDN81243.1	248
408	30.8036	37.681	44.7	1.8e-06	2	69	38	37681	224	68	cohE	5	72	MTT22434.1	4
409	30.8036	37.681	44.7	1.8e-06	2	69	38	37681	224	68	cohE	5	72	CDN82584.1	4
410	41.0714	34.783	41.2	2.99e-05	3	92	56	34783	224	219	cohE	129	139	MTT20813.1	51
411	41.0714	34.783	41.2	2.99e-05	3	92	56	34783	224	219	cohE	129	139	OLR37241.1	51
412	41.0714	34.783	41.2	2.99e-05	3	92	56	34783	224	219	cohE	129	139	CDN81683.1	51
413	65.1786	26.027	40.4	0.000119	6	146	70	26027	224	211	cohE	88	230	MTT22423.1	101
414	65.1786	26.027	40.4	0.000119	6	146	70	26027	224	211	cohE	88	230	OLR37352.1	101
415	65.1786	26.027	40.4	0.000119	6	146	70	26027	224	211	cohE	88	230	CDN81810.1	101
416	19.6429	40.909	38.1	0.000644	0	44	26	40909	224	169	cohE	126	173	MTT18810.1	130
417	19.6429	40.909	38.1	0.000644	0	44	26	40909	224	169	cohE	126	173	OLR37391.1	130
418	19.6429	40.909	38.1	0.000689	0	44	26	40909	224	169	cohE	126	195	CDN81607.1	152
419	10.2679	39.13	27.3	3.4	0	23	14	39130	224	195	cohE	173	758	MTT20531.1	736
420	10.2679	39.13	27.3	3.4	0	23	14	39130	224	195	cohE	173	758	OLR34293.1	736
421	10.2679	39.13	27.3	3.4	0	23	14	39130	224	195	cohE	173	758	CDN84801.1	736
422	28.5714	26.563	26.2	5.7	1	64	45	26563	224	206	cohE	145	183	MTT19354.1	120
423	28.5714	26.563	26.2	5.7	1	64	45	26563	224	206	cohE	145	183	OLR32870.1	120
424	28.5714	26.563	26.2	5.7	1	64	45	26563	224	206	cohE	145	183	CDN84204.1	120
425	14.7321	36.364	25.8	9.1	0	33	21	36364	224	70	cohE	38	46	MTT19833.1	14
426	14.7321	36.364	25.8	9.1	0	33	21	36364	224	70	cohE	38	46	OLR35891.1	14
427	14.7321	36.364	25.8	9.1	0	33	21	36364	224	70	cohE	38	46	CDN84353.1	14
431	65.5738	42.5	25	1.1	1	40	18	42500	61	47	csrA	8	174	MTT21368.1	140
432	65.5738	42.5	25	1.1	1	40	18	42500	61	47	csrA	8	174	OLR33552.1	140
433	65.5738	42.5	25	1.1	1	40	18	42500	61	47	csrA	8	174	CDN82709.1	140
434	47.541	31.034	24.6	1.8	0	29	20	31034	61	59	csrA	31	80	MTT22141.1	52
435	47.541	31.034	24.6	1.8	0	29	20	31034	61	59	csrA	31	80	OLR37330.1	52
436	47.541	31.034	24.6	1.8	0	29	20	31034	61	59	csrA	31	80	CDN81782.1	52
437	47.541	37.931	23.1	5	1	29	14	37931	61	36	csrA	8	204	MTT21004.1	180
438	47.541	37.931	23.1	5	1	29	14	37931	61	36	csrA	8	204	OLR34084.1	180
439	47.541	37.931	23.1	5	1	29	14	37931	61	36	csrA	8	204	CDN84634.1	180
440	44.2623	37.037	23.1	6.3	0	27	17	37037	61	37	csrA	11	345	MTT19932.1	319
441	44.2623	37.037	23.1	6.3	0	27	17	37037	61	37	csrA	11	345	OLR35138.1	319
442	44.2623	37.037	23.1	6.3	0	27	17	37037	61	37	csrA	11	349	CDN83565.1	323
443	32.7869	55	22.7	9	1	20	6	55000	61	23	csrA	7	715	MTT18975.1	696
444	32.7869	55	22.7	9	1	20	6	55000	61	23	csrA	7	715	OLR36593.1	696
445	32.7869	55	22.7	9	1	20	6	55000	61	23	csrA	7	715	CDN85306.1	696
452	9.38697	30.612	28.1	3.3	0	49	34	30612	522	439	cydA	391	52	MTT17693.1	4
453	9.38697	30.612	28.1	3.3	0	49	34	30612	522	439	cydA	391	52	OLR36071.1	4
454	9.38697	30.612	28.1	3.3	0	49	34	30612	522	439	cydA	391	52	CDN82872.1	4
455	6.89655	41.667	28.1	4.3	2	36	17	41667	522	457	cydA	422	121	MTT21080.1	90
456	6.89655	41.667	28.1	4.3	2	36	17	41667	522	457	cydA	422	121	OLR35757.1	90
457	6.89655	41.667	28.1	4.3	2	36	17	41667	522	457	cydA	422	121	CDN84559.1	90
458	10.3448	33.333	27.3	7.8	1	54	33	33333	522	243	cydA	193	221	MTT18956.1	168
459	10.3448	33.333	27.3	7.8	1	54	33	33333	522	243	cydA	193	221	OLR36611.1	168
460	10.3448	33.333	27.3	7.8	1	54	33	33333	522	243	cydA	193	221	CDN85325.1	168
461	5.9387	45.161	27.3	9.9	0	31	17	45161	522	429	cydA	399	108	MTT21212.1	78
462	5.9387	45.161	27.3	9.9	0	31	17	45161	522	429	cydA	399	108	OLR36796.1	78
463	5.9387	45.161	27.3	9.9	0	31	17	45161	522	429	cydA	399	108	CDN80533.1	78
470	24.2744	28.261	30.4	0.85	3	92	52	28261	379	247	cydB	169	297	MTT21601.1	207
471	24.2744	28.261	30.4	0.85	3	92	52	28261	379	247	cydB	169	297	OLR38018.1	207
472	24.2744	28.261	30.4	0.85	3	92	52	28261	379	247	cydB	169	297	CDN80621.1	207
473	8.17942	29.032	26.2	8.2	0	31	22	29032	379	376	cydB	346	88	MTT19036.1	58
474	8.17942	29.032	26.2	8.2	0	31	22	29032	379	376	cydB	346	88	OLR37775.1	58
475	8.17942	29.032	26.2	8.2	0	31	22	29032	379	376	cydB	346	88	CDN80882.1	58
632	40.3141	21.645	48.5	3.23e-06	6	231	140	21645	573	563	cydC	359	490	MTT20393.1	275
634	40.3141	21.645	48.5	3.23e-06	6	231	140	21645	573	563	cydC	359	490	OLR34149.1	275
636	40.3141	21.645	48.1	3.97e-06	6	231	140	21645	573	563	cydC	359	505	CDN82403.1	290
662	38.0454	23.394	55.8	1.6e-08	7	218	134	23394	573	550	cydC	356	492	MTT20651.1	285
664	38.0454	23.394	55.8	1.6e-08	7	218	134	23394	573	550	cydC	356	492	OLR37714.1	285
666	38.0454	23.394	55.8	1.6e-08	7	218	134	23394	573	550	cydC	356	492	CDN80947.1	285
680	36.8237	24.171	40	0.001	9	211	135	24171	573	552	cydC	360	483	MTT18141.1	280
682	36.8237	24.171	40	0.001	9	211	135	24171	573	552	cydC	360	483	OLR36280.1	280
684	36.8237	24.171	40	0.001	9	211	135	24171	573	552	cydC	360	483	CDN85114.1	280
690	36.6492	22.857	49.3	1.6e-06	6	210	121	22857	573	533	cydC	351	469	MTT17989.1	274
692	36.6492	22.857	49.3	1.6e-06	6	210	121	22857	573	533	cydC	351	469	OLR36426.1	274
694	36.6492	22.857	49.3	1.6e-06	6	210	121	22857	573	533	cydC	351	469	CDN84958.1	274
696	48.5166	28.058	56.2	1.06e-08	11	278	161	28058	573	532	cydC	280	465	CDN81126.1	202
698	48.5166	28.058	55.8	1.37e-08	11	278	161	28058	573	532	cydC	280	461	MTT20198.1	198
700	48.5166	28.058	55.8	1.37e-08	11	278	161	28058	573	532	cydC	280	461	OLR37545.1	198
702	13.9616	26.25	32.3	0.3	2	80	57	26250	573	552	cydC	475	479	MTT21270.1	400
704	13.9616	26.25	32.3	0.3	2	80	57	26250	573	552	cydC	475	479	OLR34701.1	400
706	13.9616	26.25	32.3	0.3	2	80	57	26250	573	552	cydC	475	479	CDN83997.1	400
717	37.5218	24.186	52.4	1.56e-07	6	215	135	24186	573	550	cydC	356	483	MTT19804.1	277
719	37.5218	24.186	52.4	1.56e-07	6	215	135	24186	573	550	cydC	356	483	OLR35920.1	277
721	37.5218	24.186	52.4	1.56e-07	6	215	135	24186	573	550	cydC	356	483	CDN84323.1	277
724	17.2775	39.394	58.5	1.03e-09	3	99	56	39394	573	568	cydC	474	251	MTT19779.1	153
725	17.2775	39.394	58.5	1.03e-09	3	99	56	39394	573	568	cydC	474	251	OLR35947.1	153
726	17.2775	39.394	58.5	1.03e-09	3	99	56	39394	573	568	cydC	474	251	CDN84297.1	153
727	30.541	29.143	55.8	2.96e-09	2	175	115	29143	573	530	cydC	356	182	MTT17699.1	17
728	30.541	29.143	55.8	2.96e-09	2	175	115	29143	573	530	cydC	356	182	OLR36077.1	17
729	30.541	29.143	55.8	3.02e-09	2	175	115	29143	573	530	cydC	356	184	CDN82878.1	19
730	36.6492	28.571	57.8	3.73e-09	7	210	135	28571	573	559	cydC	356	227	MTT22156.1	27
731	36.9983	25	48.1	3.42e-06	7	212	135	25000	573	549	cydC	354	480	MTT22156.1	277
732	41.7103	22.594	57.8	3.81e-09	7	239	152	22594	573	559	cydC	339	228	MTT21057.1	5
733	16.4049	31.915	45.1	3.17e-05	3	94	57	31915	573	561	cydC	475	489	MTT21057.1	396
734	41.7103	22.594	57.8	3.81e-09	7	239	152	22594	573	559	cydC	339	228	OLR35736.1	5
735	16.4049	31.915	45.1	3.17e-05	3	94	57	31915	573	561	cydC	475	489	OLR35736.1	396
736	41.7103	22.594	57.8	3.81e-09	7	239	152	22594	573	559	cydC	339	228	CDN84582.1	5
737	16.4049	31.915	45.1	3.17e-05	3	94	57	31915	573	561	cydC	475	489	CDN84582.1	396
738	43.63	25.2	55.8	8.18e-09	9	250	155	25200	573	567	cydC	344	254	MTT20891.1	11
739	43.63	25.2	55.8	8.18e-09	9	250	155	25200	573	567	cydC	344	254	OLR35220.1	11
740	43.63	25.2	55.8	8.18e-09	9	250	155	25200	573	567	cydC	344	254	CDN81910.1	11
741	23.5602	34.074	55.5	9.3e-09	6	135	78	34074	573	567	cydC	443	263	CDN84944.1	130
742	21.1169	34.711	55.1	1.27e-08	5	121	69	34711	573	553	cydC	443	230	MTT17976.1	110
743	21.1169	34.711	55.1	1.27e-08	5	121	69	34711	573	553	cydC	443	230	OLR36440.1	110
744	36.1257	26.57	55.8	1.65e-08	6	207	137	26570	573	550	cydC	355	227	MTT19455.1	25
745	38.3944	23.182	47.4	6.61e-06	6	220	139	23182	573	558	cydC	356	484	MTT19455.1	278
746	36.1257	26.57	55.8	1.65e-08	6	207	137	26570	573	550	cydC	355	227	OLR35472.1	25
747	38.3944	23.182	47.4	6.61e-06	6	220	139	23182	573	558	cydC	356	484	OLR35472.1	278
748	36.1257	26.57	55.8	1.65e-08	6	207	137	26570	573	550	cydC	355	227	CDN83190.1	25
749	38.3944	23.182	47.4	6.61e-06	6	220	139	23182	573	558	cydC	356	484	CDN83190.1	278
750	35.0785	31.841	55.5	1.87e-08	8	201	107	31841	573	531	cydC	356	217	MTT18944.1	22
751	33.1588	26.842	40	0.001	9	190	117	26842	573	516	cydC	332	490	MTT18944.1	318
752	35.0785	31.841	55.5	1.87e-08	8	201	107	31841	573	531	cydC	356	217	OLR36624.1	22
753	33.1588	26.842	40	0.001	9	190	117	26842	573	516	cydC	332	490	OLR36624.1	318
754	35.0785	31.841	55.5	1.87e-08	8	201	107	31841	573	531	cydC	356	217	CDN85338.1	22
755	33.1588	26.842	40	0.001	9	190	117	26842	573	516	cydC	332	490	CDN85338.1	318
756	36.9983	26.415	52.4	7.53e-08	7	212	137	26415	573	560	cydC	359	221	MTT18328.1	19
757	36.9983	26.415	52.4	7.53e-08	7	212	137	26415	573	560	cydC	359	221	OLR34862.1	19
758	36.9983	26.415	52.4	7.53e-08	7	212	137	26415	573	560	cydC	359	221	CDN82213.1	19
759	39.4415	25.221	51.6	2.98e-07	10	226	145	25221	573	551	cydC	339	228	MTT17651.1	14
760	41.8848	23.333	50.1	8.9e-07	9	240	156	23333	573	548	cydC	326	482	MTT17651.1	254
761	39.4415	25.221	51.6	2.98e-07	10	226	145	25221	573	551	cydC	339	228	OLR36025.1	14
762	41.8848	23.333	50.1	8.9e-07	9	240	156	23333	573	548	cydC	326	482	OLR36025.1	254
763	39.4415	25.221	51.6	2.98e-07	10	226	145	25221	573	551	cydC	339	228	CDN82828.1	14
764	41.8848	23.333	50.1	8.9e-07	9	240	156	23333	573	548	cydC	326	482	CDN82828.1	254
765	32.9843	30.159	51.2	3.24e-07	5	189	115	30159	573	550	cydC	370	207	MTT20193.1	28
766	32.9843	30.159	51.2	3.24e-07	5	189	115	30159	573	550	cydC	370	207	OLR37539.1	28
767	32.9843	30.159	51.2	3.24e-07	5	189	115	30159	573	550	cydC	370	207	CDN81131.1	28
768	38.918	25.112	50.8	5.64e-07	9	223	131	25112	573	551	cydC	356	232	MTT18626.1	19
769	35.4276	30.542	48.9	2.59e-06	8	203	110	30542	573	531	cydC	336	495	MTT18626.1	317
770	38.918	25.112	50.8	5.64e-07	9	223	131	25112	573	551	cydC	356	232	OLR36992.1	19
771	35.4276	30.542	48.9	2.59e-06	8	203	110	30542	573	531	cydC	336	495	OLR36992.1	317
772	38.918	25.112	50.8	5.64e-07	9	223	131	25112	573	551	cydC	356	232	CDN81415.1	19
773	35.4276	30.542	48.9	2.59e-06	8	203	110	30542	573	531	cydC	336	495	CDN81415.1	317
774	39.267	28.889	48.9	1.13e-06	9	225	131	28889	573	572	cydC	366	243	MTT22165.1	30
775	39.267	28.889	48.9	1.13e-06	9	225	131	28889	573	572	cydC	366	243	OLR32798.1	30
776	39.267	28.889	48.9	1.13e-06	9	225	131	28889	573	572	cydC	366	243	CDN82658.1	30
777	32.6353	28.342	46.2	1.54e-05	5	187	94	28342	573	531	cydC	356	485	MTT19248.1	328
778	28.7958	29.091	43.5	0.000118	4	165	103	29091	573	506	cydC	356	181	MTT19248.1	17
779	32.6353	28.342	46.2	1.54e-05	5	187	94	28342	573	531	cydC	356	485	OLR33698.1	328
780	28.7958	29.091	43.5	0.000118	4	165	103	29091	573	506	cydC	356	181	OLR33698.1	17
781	32.6353	28.342	46.2	1.54e-05	5	187	94	28342	573	531	cydC	356	485	CDN84094.1	328
782	28.7958	29.091	43.5	0.000118	4	165	103	29091	573	506	cydC	356	181	CDN84094.1	17
783	31.4136	23.889	45.4	3.04e-05	6	180	112	23889	573	531	cydC	356	493	MTT20138.1	335
784	35.0785	24.876	39.7	0.002	8	201	127	24876	573	531	cydC	352	210	MTT20138.1	13
785	31.4136	23.889	45.4	3.04e-05	6	180	112	23889	573	531	cydC	356	493	OLR37484.1	335
786	35.0785	24.876	39.7	0.002	8	201	127	24876	573	531	cydC	352	210	OLR37484.1	13
787	31.4136	23.889	45.4	3.04e-05	6	180	112	23889	573	531	cydC	356	493	CDN81187.1	335
788	35.0785	24.876	39.7	0.002	8	201	127	24876	573	531	cydC	352	210	CDN81187.1	13
789	35.7766	30.732	42.4	0.000113	9	205	101	30732	573	548	cydC	369	219	MTT19948.1	31
790	35.7766	30.732	42.4	0.000113	9	205	101	30732	573	548	cydC	369	219	OLR35120.1	31
791	43.8045	25.896	40.8	0.000421	9	251	149	25896	573	564	cydC	339	240	MTT18355.1	2
792	43.8045	25.896	40.8	0.000421	9	251	149	25896	573	564	cydC	339	240	OLR34533.1	2
793	43.8045	25.896	40.8	0.000421	9	251	149	25896	573	564	cydC	339	240	CDN82184.1	2
794	13.438	31.169	40.4	0.001	2	77	44	31169	573	531	cydC	464	486	OLR31199.1	410
795	13.9616	36.25	39.3	0.002	3	80	46	36250	573	533	cydC	459	892	MTT17952.1	813
796	13.9616	36.25	39.3	0.002	3	80	46	36250	573	533	cydC	459	892	OLR36463.1	813
797	13.9616	36.25	39.3	0.002	3	80	46	36250	573	533	cydC	459	892	CDN84918.1	813
798	13.438	31.169	32	0.2	1	77	50	31169	573	548	cydC	475	172	CDN83548.1	96
799	25.3054	26.207	32.3	0.31	5	145	85	26207	573	388	cydC	254	340	MTT18988.1	208
800	25.3054	26.207	32.3	0.31	5	145	85	26207	573	388	cydC	254	340	OLR36580.1	208
801	25.3054	26.207	32.3	0.31	5	145	85	26207	573	388	cydC	254	340	CDN85293.1	208
802	15.8813	30.769	30	0.8	4	91	45	30769	573	338	cydC	265	155	CDN81430.1	66
803	15.8813	30.769	29.6	1	4	91	45	30769	573	338	cydC	265	152	MTT18640.1	63
804	15.8813	30.769	29.6	1	4	91	45	30769	573	338	cydC	265	152	OLR37003.1	63
805	10.8202	29.032	30	1.3	2	62	42	29032	573	569	cydC	509	146	MTT18063.1	86
806	10.8202	29.032	30	1.3	2	62	42	29032	573	569	cydC	509	146	OLR36355.1	86
807	10.8202	29.032	30	1.3	2	62	42	29032	573	569	cydC	509	146	CDN85037.1	86
808	10.4712	33.333	30.4	1.4	1	60	36	33333	573	531	cydC	476	491	MTT19730.1	432
809	10.4712	33.333	30.4	1.4	1	60	36	33333	573	531	cydC	476	491	OLR31803.1	432
810	10.4712	33.333	30.4	1.4	1	60	36	33333	573	531	cydC	476	491	CDN83254.1	432
811	20.4188	26.496	30	1.5	5	117	74	26496	573	509	cydC	402	257	OLR29873.1	144
812	4.01396	52.174	30	1.8	0	23	11	52174	573	391	cydC	369	27	MTT19485.1	5
813	4.01396	52.174	30	1.8	0	23	11	52174	573	391	cydC	369	27	OLR35518.1	5
814	4.01396	52.174	29.6	1.9	0	23	11	52174	573	391	cydC	369	40	CDN83158.1	18
815	8.726	36	29.3	2.1	2	50	28	36000	573	155	cydC	109	145	MTT20168.1	97
816	8.726	36	29.3	2.1	2	50	28	36000	573	155	cydC	109	145	OLR37514.1	97
817	8.726	36	29.3	2.1	2	50	28	36000	573	155	cydC	109	145	CDN81156.1	97
818	15.1832	27.586	29.6	2.2	3	87	55	27586	573	546	cydC	463	119	MTT18274.1	38
819	15.1832	27.586	29.6	2.2	3	87	55	27586	573	546	cydC	463	119	OLR34919.1	38
820	15.1832	27.586	29.6	2.2	3	87	55	27586	573	546	cydC	463	119	CDN82269.1	38
821	8.20244	31.915	29.3	2.4	2	47	27	31915	573	382	cydC	340	119	CDN82649.1	74
822	8.20244	31.915	28.5	2.6	2	47	27	31915	573	382	cydC	340	60	MTT22302.1	15
823	11.5183	31.818	28.5	5	1	66	38	31818	573	416	cydC	351	211	MTT17947.1	153
824	11.5183	31.818	28.5	5	1	66	38	31818	573	416	cydC	351	211	OLR36468.1	153
825	11.5183	31.818	28.5	5	1	66	38	31818	573	416	cydC	351	211	CDN84913.1	153
826	8.37696	25	27.7	8.3	0	48	36	25000	573	413	cydC	366	191	MTT18582.1	144
827	8.37696	25	27.7	8.3	0	48	36	25000	573	413	cydC	366	191	OLR36947.1	144
828	8.37696	25	27.7	8.3	0	48	36	25000	573	413	cydC	366	191	CDN81370.1	144
829	7.32984	33.333	27.3	8.6	0	42	28	33333	573	105	cydC	64	286	MTT18053.1	245
830	7.32984	33.333	27.3	8.6	0	42	28	33333	573	105	cydC	64	286	OLR36365.1	245
831	7.32984	33.333	27.3	8.6	0	42	28	33333	573	105	cydC	64	286	CDN85027.1	245
832	3.14136	66.667	27.3	9.5	0	18	6	66667	573	386	cydC	369	28	MTT19435.1	11
833	3.14136	66.667	27.3	9.5	0	18	6	66667	573	386	cydC	369	28	OLR35492.1	11
834	3.14136	66.667	27.3	9.5	0	18	6	66667	573	386	cydC	369	28	CDN83209.1	11
866	41.1565	21.901	47.8	5.5e-06	6	242	121	21901	588	561	cydD	360	492	MTT20651.1	279
868	41.1565	21.901	47.8	5.5e-06	6	242	121	21901	588	561	cydD	360	492	OLR37714.1	279
870	41.1565	21.901	47.8	5.5e-06	6	242	121	21901	588	561	cydD	360	492	CDN80947.1	279
922	34.0136	26	45.8	2.24e-05	7	200	137	26000	588	559	cydD	369	479	MTT22156.1	282
933	39.6259	23.605	39.3	0.002	10	233	152	23605	588	561	cydD	347	477	MTT20393.1	253
935	39.6259	23.605	39.3	0.002	10	233	152	23605	588	561	cydD	347	477	OLR34149.1	253
937	39.6259	23.605	39.3	0.002	10	233	152	23605	588	561	cydD	347	492	CDN82403.1	268
949	35.3741	24.519	42.7	0.000206	11	208	138	24519	588	561	cydD	369	483	MTT19804.1	280
951	35.3741	24.519	42.7	0.000206	11	208	138	24519	588	561	cydD	369	483	OLR35920.1	280
953	35.3741	24.519	42.7	0.000206	11	208	138	24519	588	561	cydD	369	483	CDN84323.1	280
994	35.7143	30	57	1.28e-09	9	210	117	30000	588	549	cydD	350	193	CDN82878.1	4
995	35.7143	30	57	1.39e-09	9	210	117	30000	588	549	cydD	350	191	MTT17699.1	2
996	35.7143	30	57	1.39e-09	9	210	117	30000	588	549	cydD	350	191	OLR36077.1	2
997	36.5646	30.233	57	1.44e-09	9	215	120	30233	588	547	cydD	347	208	CDN82260.1	10
998	34.6939	29.412	57.4	1.64e-09	8	204	130	29412	588	563	cydD	369	220	MTT20797.1	22
999	34.6939	29.412	57.4	1.64e-09	8	204	130	29412	588	563	cydD	369	220	OLR37257.1	22
1000	34.6939	29.412	57.4	1.64e-09	8	204	130	29412	588	563	cydD	369	220	CDN81699.1	22
1001	40.8163	27.5	59.3	1.69e-09	10	240	146	27500	588	570	cydD	347	235	MTT19379.1	8
1002	36.3946	24.299	45.4	3.41e-05	9	214	136	24299	588	570	cydD	369	494	MTT19379.1	295
1003	40.8163	27.5	59.3	1.69e-09	10	240	146	27500	588	570	cydD	347	235	OLR32845.1	8
1004	36.3946	24.299	45.4	3.41e-05	9	214	136	24299	588	570	cydD	369	494	OLR32845.1	295
1005	40.8163	27.5	59.3	1.73e-09	10	240	146	27500	588	570	cydD	347	234	CDN84230.1	7
1006	36.3946	24.299	45.4	3.52e-05	9	214	136	24299	588	570	cydD	369	493	CDN84230.1	294
1007	36.7347	29.167	57	1.94e-09	10	216	123	29167	588	565	cydD	369	228	MTT17999.1	24
1008	36.7347	29.167	57	1.94e-09	10	216	123	29167	588	565	cydD	369	228	OLR36417.1	24
1009	32.8231	33.161	56.6	2.37e-09	8	193	79	33161	588	534	cydD	370	198	MTT17998.1	28
1010	32.8231	33.161	56.6	2.37e-09	8	193	79	33161	588	534	cydD	370	198	OLR36418.1	28
1011	32.8231	33.161	56.6	2.37e-09	8	193	79	33161	588	534	cydD	370	198	CDN84967.1	28
1012	31.4626	27.027	56.6	2.39e-09	7	185	113	27027	588	550	cydD	369	189	MTT21950.1	24
1013	36.3946	27.57	57	2.63e-09	7	214	137	27570	588	570	cydD	368	238	MTT20890.1	32
1014	36.3946	27.57	57	2.63e-09	7	214	137	27570	588	570	cydD	368	238	OLR35219.1	32
1015	36.3946	27.57	57	2.63e-09	7	214	137	27570	588	570	cydD	368	238	CDN81909.1	32
1016	36.9048	27.189	58.2	2.73e-09	9	217	134	27189	588	561	cydD	364	473	MTT21057.1	262
1017	38.2653	26.222	50.4	6.73e-07	11	225	143	26222	588	571	cydD	360	229	MTT21057.1	15
1018	36.9048	27.189	58.2	2.73e-09	9	217	134	27189	588	561	cydD	364	473	OLR35736.1	262
1019	38.2653	26.222	50.4	6.73e-07	11	225	143	26222	588	571	cydD	360	229	OLR35736.1	15
1020	36.9048	27.189	58.2	2.73e-09	9	217	134	27189	588	561	cydD	364	473	CDN84582.1	262
1021	38.2653	26.222	50.4	6.73e-07	11	225	143	26222	588	571	cydD	360	229	CDN84582.1	15
1022	37.0748	28.44	58.2	2.94e-09	5	218	143	28440	588	563	cydD	349	529	MTT17710.1	322
1023	10.8844	37.5	30.8	0.87	1	64	34	37500	588	253	cydD	196	133	MTT17710.1	70
1024	37.0748	28.44	58.2	2.94e-09	5	218	143	28440	588	563	cydD	349	529	OLR36088.1	322
1025	10.8844	37.5	30.8	0.87	1	64	34	37500	588	253	cydD	196	133	OLR36088.1	70
1026	37.0748	28.44	58.2	2.94e-09	5	218	143	28440	588	563	cydD	349	529	CDN82889.1	322
1027	10.8844	37.5	30.8	0.87	1	64	34	37500	588	253	cydD	196	133	CDN82889.1	70
1028	36.7347	29.167	56.6	3.3e-09	10	216	123	29167	588	565	cydD	369	238	CDN84968.1	34
1029	42.0068	27.53	56.6	3.52e-09	9	247	132	27530	588	565	cydD	350	235	MTT18007.1	5
1030	42.0068	27.53	56.6	3.52e-09	9	247	132	27530	588	565	cydD	350	235	OLR36409.1	5
1031	42.0068	27.53	56.6	3.52e-09	9	247	132	27530	588	565	cydD	350	235	CDN84976.1	5
1032	36.3946	27.57	56.2	3.92e-09	7	214	126	27570	588	563	cydD	369	232	MTT21081.1	29
1033	36.3946	27.57	56.2	3.92e-09	7	214	126	27570	588	563	cydD	369	232	OLR35758.1	29
1034	36.3946	27.57	56.2	3.92e-09	7	214	126	27570	588	563	cydD	369	232	CDN84558.1	29
1035	34.3537	31.683	55.5	4.2e-09	9	202	108	31683	588	547	cydD	360	197	MTT18283.1	12
1036	34.3537	31.683	55.5	4.2e-09	9	202	108	31683	588	547	cydD	360	197	OLR34908.1	12
1037	36.3946	31.776	56.6	6.3e-09	8	214	120	31776	588	570	cydD	369	216	MTT20193.1	17
1038	36.3946	31.776	56.6	6.3e-09	8	214	120	31776	588	570	cydD	369	216	OLR37539.1	17
1039	36.3946	31.776	56.6	6.3e-09	8	214	120	31776	588	570	cydD	369	216	CDN81131.1	17
1040	35.034	25.728	56.6	8.32e-09	6	206	144	25728	588	571	cydD	369	547	MTT20164.1	348
1041	39.4558	27.155	45.1	3.62e-05	8	232	148	27155	588	584	cydD	363	240	MTT20164.1	20
1042	35.034	25.728	56.6	8.32e-09	6	206	144	25728	588	571	cydD	369	547	OLR37510.1	348
1043	39.4558	27.155	45.1	3.62e-05	8	232	148	27155	588	584	cydD	363	240	OLR37510.1	20
1044	35.034	25.728	56.6	8.96e-09	6	206	144	25728	588	571	cydD	369	552	CDN81160.1	353
1045	39.4558	27.155	45.1	3.83e-05	8	232	148	27155	588	584	cydD	363	245	CDN81160.1	25
1046	37.9252	25.561	55.5	9.7e-09	6	223	144	25561	588	573	cydD	364	234	MTT20664.1	21
1047	37.9252	25.561	55.5	9.7e-09	6	223	144	25561	588	573	cydD	364	234	OLR37701.1	21
1048	37.9252	25.561	55.5	9.7e-09	6	223	144	25561	588	573	cydD	364	234	CDN80961.1	21
1049	34.5238	27.094	56.2	1.26e-08	7	203	133	27094	588	562	cydD	369	224	MTT18141.1	28
1050	44.5578	27.863	54.7	3.08e-08	14	262	142	27863	588	572	cydD	336	491	MTT18141.1	252
1051	34.5238	27.094	56.2	1.26e-08	7	203	133	27094	588	562	cydD	369	224	OLR36280.1	28
1052	44.5578	27.863	54.7	3.08e-08	14	262	142	27863	588	572	cydD	336	491	OLR36280.1	252
1053	34.5238	27.094	56.2	1.26e-08	7	203	133	27094	588	562	cydD	369	224	CDN85114.1	28
1054	44.5578	27.863	54.7	3.08e-08	14	262	142	27863	588	572	cydD	336	491	CDN85114.1	252
1055	35.7143	23.333	54.3	5.13e-08	6	210	154	23333	588	571	cydD	369	233	MTT17989.1	24
1056	38.9456	24.017	47.8	4.65e-06	11	229	142	24017	588	563	cydD	357	489	MTT17989.1	271
1057	35.7143	23.333	54.3	5.13e-08	6	210	154	23333	588	571	cydD	369	233	OLR36426.1	24
1058	38.9456	24.017	47.8	4.65e-06	11	229	142	24017	588	563	cydD	357	489	OLR36426.1	271
1059	35.7143	23.333	54.3	5.13e-08	6	210	154	23333	588	571	cydD	369	233	CDN84958.1	24
1060	38.9456	24.017	47.8	4.65e-06	11	229	142	24017	588	563	cydD	357	489	CDN84958.1	271
1061	27.0408	33.962	53.9	6.11e-08	8	159	89	33962	588	517	cydD	369	495	MTT20130.1	343
1062	39.1156	24.783	44.3	6.52e-05	8	230	137	24783	588	570	cydD	369	256	MTT20130.1	35
1063	27.0408	33.962	53.9	6.11e-08	8	159	89	33962	588	517	cydD	369	495	OLR37476.1	343
1064	39.1156	24.783	44.3	6.52e-05	8	230	137	24783	588	570	cydD	369	256	OLR37476.1	35
1065	27.0408	33.962	53.9	6.11e-08	8	159	89	33962	588	517	cydD	369	495	CDN81195.1	343
1066	39.1156	24.783	44.3	6.52e-05	8	230	137	24783	588	570	cydD	369	256	CDN81195.1	35
1067	35.7143	27.619	53.5	7.84e-08	7	210	124	27619	588	561	cydD	369	227	MTT19455.1	29
1068	35.7143	24.762	51.6	2.98e-07	8	210	129	24762	588	559	cydD	369	480	MTT19455.1	281
1069	35.7143	27.619	53.5	7.84e-08	7	210	124	27619	588	561	cydD	369	227	OLR35472.1	29
1070	35.7143	24.762	51.6	2.98e-07	8	210	129	24762	588	559	cydD	369	480	OLR35472.1	281
1071	35.7143	27.619	53.5	7.84e-08	7	210	124	27619	588	561	cydD	369	227	CDN83190.1	29
1072	35.7143	24.762	51.6	2.98e-07	8	210	129	24762	588	559	cydD	369	480	CDN83190.1	281
1073	43.3673	28.235	52.8	8.78e-08	10	255	134	28235	588	570	cydD	348	246	MTT20891.1	9
1074	43.3673	28.235	52.8	8.78e-08	10	255	134	28235	588	570	cydD	348	246	OLR35220.1	9
1075	43.3673	28.235	52.8	8.78e-08	10	255	134	28235	588	570	cydD	348	246	CDN81910.1	9
1076	31.2925	27.717	51.6	1.32e-07	8	184	102	27717	588	545	cydD	369	182	MTT18182.1	23
1077	31.2925	27.717	51.6	1.32e-07	8	184	102	27717	588	545	cydD	369	182	OLR35010.1	23
1078	31.2925	27.717	51.6	1.32e-07	8	184	102	27717	588	545	cydD	369	182	CDN82362.1	23
1079	37.7551	27.928	52	1.58e-07	11	222	128	27928	588	565	cydD	363	244	MTT19778.1	36
1080	37.7551	27.928	52	1.58e-07	11	222	128	27928	588	565	cydD	363	244	OLR35948.1	36
1081	37.7551	27.928	52	1.58e-07	11	222	128	27928	588	565	cydD	363	244	CDN84296.1	36
1082	37.9252	26.906	52	1.75e-07	10	223	125	26906	588	565	cydD	369	236	MTT19779.1	26
1083	37.9252	26.906	52	1.75e-07	10	223	125	26906	588	565	cydD	369	236	OLR35947.1	26
1084	37.9252	26.906	52	1.75e-07	10	223	125	26906	588	565	cydD	369	236	CDN84297.1	26
1085	37.0748	29.358	51.6	3.48e-07	9	218	136	29358	588	570	cydD	361	226	CDN81126.1	19
1086	35.034	28.641	47.4	7.49e-06	8	206	123	28641	588	546	cydD	357	468	CDN81126.1	271
1087	37.0748	29.358	51.2	3.68e-07	9	218	136	29358	588	570	cydD	361	222	MTT20198.1	15
1088	35.034	28.641	47	8.42e-06	8	206	123	28641	588	546	cydD	357	464	MTT20198.1	267
1089	37.0748	29.358	51.2	3.68e-07	9	218	136	29358	588	570	cydD	361	222	OLR37545.1	15
1090	35.034	28.641	47	8.42e-06	8	206	123	28641	588	546	cydD	357	464	OLR37545.1	267
1091	40.3061	27.426	51.2	4.85e-07	12	237	134	27426	588	567	cydD	341	519	MTT18626.1	311
1092	28.2313	30.723	39.7	0.002	9	166	85	30723	588	517	cydD	376	188	MTT18626.1	29
1093	40.3061	27.426	51.2	4.85e-07	12	237	134	27426	588	567	cydD	341	519	OLR36992.1	311
1094	28.2313	30.723	39.7	0.002	9	166	85	30723	588	517	cydD	376	188	OLR36992.1	29
1095	40.3061	27.426	51.2	4.85e-07	12	237	134	27426	588	567	cydD	341	519	CDN81415.1	311
1096	28.2313	30.723	39.7	0.002	9	166	85	30723	588	517	cydD	376	188	CDN81415.1	29
1097	38.2653	25.778	47.4	3.37e-06	9	225	127	25778	588	565	cydD	369	236	MTT19342.1	24
1098	38.2653	25.778	47.4	3.37e-06	9	225	127	25778	588	565	cydD	369	236	OLR32881.1	24
1099	38.2653	25.778	47.4	3.37e-06	9	225	127	25778	588	565	cydD	369	236	CDN84191.1	24
1100	37.9252	25.561	47	4.53e-06	8	223	152	25561	588	568	cydD	359	231	MTT18355.1	10
1101	37.9252	25.561	47	4.53e-06	8	223	152	25561	588	568	cydD	359	231	OLR34533.1	10
1102	37.9252	25.561	47	4.53e-06	8	223	152	25561	588	568	cydD	359	231	CDN82184.1	10
1103	33.8435	23.116	46.6	5.44e-06	6	199	142	23116	588	562	cydD	369	220	CDN84190.1	28
1104	33.8435	23.116	46.6	5.8e-06	6	199	142	23116	588	562	cydD	369	212	OLR32900.1	20
1105	33.8435	23.116	46.6	5.94e-06	6	199	142	23116	588	562	cydD	369	216	MTT19341.1	24
1106	41.4966	29.508	47	9.4e-06	13	244	122	29508	588	585	cydD	372	246	MTT19248.1	23
1107	28.2313	30.12	35.4	0.042	8	166	87	30120	588	528	cydD	369	473	MTT19248.1	331
1108	41.4966	29.508	47	9.4e-06	13	244	122	29508	588	585	cydD	372	246	OLR33698.1	23
1109	28.2313	30.12	35.4	0.042	8	166	87	30120	588	528	cydD	369	473	OLR33698.1	331
1110	41.4966	29.508	47	9.4e-06	13	244	122	29508	588	585	cydD	372	246	CDN84094.1	23
1111	28.2313	30.12	35.4	0.042	8	166	87	30120	588	528	cydD	369	473	CDN84094.1	331
1112	37.7551	24.775	45.8	1.34e-05	7	222	155	24775	588	564	cydD	348	217	MTT21235.1	3
1113	37.7551	24.775	45.8	1.34e-05	7	222	155	24775	588	564	cydD	348	217	OLR36774.1	3
1114	37.7551	24.775	45.8	1.34e-05	7	222	155	24775	588	564	cydD	348	217	CDN80510.1	3
1115	36.7347	23.611	46.2	1.47e-05	6	216	149	23611	588	561	cydD	361	477	MTT21270.1	263
1116	34.1837	21.891	46.2	1.63e-05	6	201	146	21891	588	562	cydD	369	220	MTT21270.1	24
1117	36.7347	23.611	46.2	1.47e-05	6	216	149	23611	588	561	cydD	361	477	OLR34701.1	263
1118	34.1837	21.891	46.2	1.63e-05	6	201	146	21891	588	562	cydD	369	220	OLR34701.1	24
1119	36.7347	23.611	46.2	1.47e-05	6	216	149	23611	588	561	cydD	361	477	CDN83997.1	263
1120	34.1837	21.891	46.2	1.63e-05	6	201	146	21891	588	562	cydD	369	220	CDN83997.1	24
1121	33.3333	25	45.8	1.87e-05	8	196	118	25000	588	560	cydD	381	226	MTT17651.1	44
1122	17.3469	27.451	36.6	0.015	3	102	68	27451	588	559	cydD	460	482	MTT17651.1	385
1123	33.3333	25	45.8	1.87e-05	8	196	118	25000	588	560	cydD	381	226	OLR36025.1	44
1124	17.3469	27.451	36.6	0.015	3	102	68	27451	588	559	cydD	460	482	OLR36025.1	385
1125	33.3333	25	45.8	1.87e-05	8	196	118	25000	588	560	cydD	381	226	CDN82828.1	44
1126	17.3469	27.451	36.6	0.015	3	102	68	27451	588	559	cydD	460	482	CDN82828.1	385
1127	37.585	25.792	44.3	2.7e-05	8	221	143	25792	588	570	cydD	361	224	MTT21319.1	14
1128	37.585	25.792	44.3	2.7e-05	8	221	143	25792	588	570	cydD	361	224	OLR34748.1	14
1129	37.585	25.792	44.3	2.7e-05	8	221	143	25792	588	570	cydD	361	224	CDN83945.1	14
1130	38.4354	26.549	45.4	3.08e-05	9	226	118	26549	588	550	cydD	360	228	MTT18944.1	16
1131	29.0816	24.561	36.6	0.017	4	171	105	24561	588	528	cydD	363	487	MTT18944.1	336
1132	38.4354	26.549	45.4	3.08e-05	9	226	118	26549	588	550	cydD	360	228	OLR36624.1	16
1133	29.0816	24.561	36.6	0.017	4	171	105	24561	588	528	cydD	363	487	OLR36624.1	336
1134	38.4354	26.549	45.4	3.08e-05	9	226	118	26549	588	550	cydD	360	228	CDN85338.1	16
1135	29.0816	24.561	36.6	0.017	4	171	105	24561	588	528	cydD	363	487	CDN85338.1	336
1136	16.6667	36.735	43.9	5.18e-05	5	98	53	36735	588	565	cydD	474	234	MTT17800.1	140
1137	16.6667	36.735	43.9	5.18e-05	5	98	53	36735	588	565	cydD	474	234	OLR36178.1	140
1138	16.6667	36.735	43.9	5.18e-05	5	98	53	36735	588	565	cydD	474	234	CDN82983.1	140
1139	33.8435	29.146	43.1	8.63e-05	5	199	128	29146	588	565	cydD	372	216	MTT22165.1	26
1140	33.8435	29.146	43.1	8.63e-05	5	199	128	29146	588	565	cydD	372	216	OLR32798.1	26
1141	33.8435	29.146	43.1	8.63e-05	5	199	128	29146	588	565	cydD	372	216	CDN82658.1	26
1142	34.0136	26.5	40.8	0.000339	8	200	113	26500	588	559	cydD	381	219	MTT19948.1	33
1143	34.0136	26.5	40.8	0.000339	8	200	113	26500	588	559	cydD	381	219	OLR35120.1	33
1144	36.9048	27.65	39.7	0.001	8	217	143	27650	588	576	cydD	369	238	MTT21325.1	27
1145	36.9048	27.65	39.7	0.001	8	217	143	27650	588	576	cydD	369	238	OLR34754.1	27
1146	36.9048	27.65	39.7	0.001	8	217	143	27650	588	576	cydD	369	238	CDN83939.1	27
1147	34.5238	26.108	38.9	0.003	6	203	121	26108	588	542	cydD	363	210	MTT20138.1	14
1148	34.5238	26.108	38.9	0.003	6	203	121	26108	588	542	cydD	363	210	OLR37484.1	14
1149	34.5238	26.108	38.9	0.003	6	203	121	26108	588	542	cydD	363	210	CDN81187.1	14
1150	13.6054	35	35.8	0.027	3	80	46	35000	588	552	cydD	479	902	MTT17952.1	823
1151	6.80272	42.5	31.2	0.9	1	40	22	42500	588	394	cydD	355	651	MTT17952.1	613
1152	17.517	26.214	28.5	5.4	3	103	69	26214	588	582	cydD	483	582	MTT17952.1	484
1153	13.6054	35	35.8	0.027	3	80	46	35000	588	552	cydD	479	902	OLR36463.1	823
1154	6.80272	42.5	31.2	0.9	1	40	22	42500	588	394	cydD	355	651	OLR36463.1	613
1155	17.517	26.214	28.5	5.4	3	103	69	26214	588	582	cydD	483	582	OLR36463.1	484
1156	13.6054	35	35.8	0.027	3	80	46	35000	588	552	cydD	479	902	CDN84918.1	823
1157	6.80272	42.5	31.2	0.9	1	40	22	42500	588	394	cydD	355	651	CDN84918.1	613
1158	17.517	26.214	28.5	5.4	3	103	69	26214	588	582	cydD	483	582	CDN84918.1	484
1159	20.9184	27.642	34.3	0.039	4	123	72	27642	588	559	cydD	441	172	CDN83548.1	63
1160	27.2109	26.25	33.1	0.082	7	160	90	26250	588	529	cydD	377	140	MTT19528.1	2
1161	27.2109	26.25	33.1	0.082	7	160	90	26250	588	529	cydD	377	140	OLR35401.1	2
1162	27.2109	26.25	33.1	0.082	7	160	90	26250	588	529	cydD	377	140	CDN83115.1	2
1163	4.42177	57.692	32.3	0.33	0	26	11	57692	588	398	cydD	373	238	MTT21099.1	213
1164	4.42177	57.692	32.3	0.33	0	26	11	57692	588	398	cydD	373	238	OLR35776.1	213
1165	4.42177	57.692	32.3	0.33	0	26	11	57692	588	398	cydD	373	238	CDN84540.1	213
1166	31.8027	22.995	30.4	0.78	5	187	111	22995	588	549	cydD	364	191	OLR29872.1	37
1167	4.2517	56	30.4	1.2	0	25	11	56000	588	399	cydD	375	230	MTT18070.1	206
1168	4.2517	56	30.4	1.2	0	25	11	56000	588	399	cydD	375	230	OLR36348.1	206
1169	4.2517	56	30.4	1.3	0	25	11	56000	588	399	cydD	375	241	CDN85044.1	217
1170	4.42177	50	28.1	3.5	1	26	8	50000	588	406	cydD	381	61	CDN82662.1	41
1171	4.42177	50	28.1	3.6	1	26	8	50000	588	406	cydD	381	61	OLR32802.1	41
1172	4.42177	50	28.1	3.8	1	26	8	50000	588	406	cydD	381	61	MTT22169.1	41
1173	6.46259	28.947	28.1	5.4	0	38	27	28947	588	400	cydD	363	183	OLR30311.1	146
1174	4.42177	50	28.1	5.5	1	26	8	50000	588	406	cydD	381	61	OLR35528.1	41
1175	4.42177	50	28.1	5.8	1	26	8	50000	588	406	cydD	381	61	CDN84480.1	41
1176	4.42177	50	28.1	5.9	1	26	8	50000	588	406	cydD	381	61	CDN83658.1	41
1177	2.72109	68.75	26.9	6	0	16	5	68750	588	396	cydD	381	56	MTT22502.1	41
1178	4.42177	50	28.1	6.1	1	26	8	50000	588	406	cydD	381	61	OLR28742.1	41
1179	4.42177	50	28.1	6.1	1	26	8	50000	588	406	cydD	381	61	CDN85206.1	41
1180	2.72109	68.75	26.9	6.2	0	16	5	68750	588	396	cydD	381	56	MTT22378.1	41
1181	5.78231	44.118	27.7	8.1	1	34	17	44118	588	63	cydD	32	397	MTT18226.1	364
1182	5.78231	44.118	27.7	8.1	1	34	17	44118	588	63	cydD	32	397	OLR34965.1	364
1183	5.78231	44.118	27.7	8.2	1	34	17	44118	588	63	cydD	32	407	CDN82316.1	374
1184	16.8367	26.263	26.9	8.3	2	99	62	26263	588	435	cydD	348	140	MTT19478.1	42
1185	16.8367	26.263	26.9	8.3	2	99	62	26263	588	435	cydD	348	140	OLR35450.1	42
1186	16.8367	26.263	26.9	8.3	2	99	62	26263	588	435	cydD	348	140	CDN83165.1	42
1187	18.7075	25.455	27.7	9.1	3	110	66	25455	588	287	cydD	182	152	MTT19645.1	55
1188	18.7075	25.455	27.7	9.1	3	110	66	25455	588	287	cydD	182	152	OLR34589.1	55
1189	18.7075	25.455	27.7	9.1	3	110	66	25455	588	287	cydD	182	152	CDN83342.1	55
1193	67.5676	40	26.2	0.053	0	25	15	40000	37	25	cydX	1	25	MTT18656.1	1
1194	67.5676	40	26.2	0.053	0	25	15	40000	37	25	cydX	1	25	OLR37020.1	1
1195	67.5676	40	26.2	0.053	0	25	15	40000	37	25	cydX	1	25	CDN81446.1	1
1196	86.4865	34.375	21.6	8.6	0	32	21	34375	37	36	cydX	5	173	MTT21011.1	142
1197	86.4865	34.375	21.6	8.6	0	32	21	34375	37	36	cydX	5	173	OLR34078.1	142
1198	86.4865	34.375	21.6	8.6	0	32	21	34375	37	36	cydX	5	173	CDN84627.1	142
1202	12.7983	33.898	39.7	0.001	0	59	39	33898	461	324	cysS	266	660	MTT18906.1	602
1203	24.5119	25.664	27.7	7.3	3	113	68	25664	461	133	cysS	37	177	MTT18906.1	65
1204	12.7983	33.898	39.7	0.001	0	59	39	33898	461	324	cysS	266	660	OLR36660.1	602
1205	24.5119	25.664	27.7	7.3	3	113	68	25664	461	133	cysS	37	177	OLR36660.1	65
1206	12.7983	33.898	39.7	0.001	0	59	39	33898	461	324	cysS	266	660	CDN80394.1	602
1207	24.5119	25.664	27.7	7.3	3	113	68	25664	461	133	cysS	37	177	CDN80394.1	65
1208	35.5748	23.78	37.4	0.006	4	164	111	23780	461	378	cysS	224	450	MTT17616.1	292
1209	14.9675	27.536	32.3	0.28	0	69	50	27536	461	105	cysS	37	90	MTT17616.1	22
1210	35.5748	23.78	37.4	0.006	4	164	111	23780	461	378	cysS	224	450	OLR35990.1	292
1211	14.9675	27.536	32.3	0.28	0	69	50	27536	461	105	cysS	37	90	OLR35990.1	22
1212	35.5748	23.78	37.4	0.006	4	164	111	23780	461	378	cysS	224	453	CDN82790.1	295
1213	14.9675	27.536	32.3	0.26	0	69	50	27536	461	105	cysS	37	93	CDN82790.1	25
1214	35.5748	23.78	37.4	0.006	4	164	111	23780	461	378	cysS	224	450	OLR29856.1	292
1215	14.9675	27.536	32.3	0.27	0	69	50	27536	461	105	cysS	37	90	OLR29856.1	22
1216	4.77223	54.545	31.2	0.65	0	22	10	54545	461	58	cysS	37	117	CDN81014.1	96
1217	13.6659	30.159	29.6	1.6	1	63	43	30159	461	320	cysS	259	721	CDN81014.1	659
1218	4.77223	54.545	31.2	0.66	0	22	10	54545	461	58	cysS	37	70	MTT20715.1	49
1219	13.6659	30.159	29.6	1.6	1	63	43	30159	461	320	cysS	259	674	MTT20715.1	612
1220	4.77223	54.545	31.2	0.66	0	22	10	54545	461	58	cysS	37	70	OLR37650.1	49
1221	13.6659	30.159	29.6	1.6	1	63	43	30159	461	320	cysS	259	674	OLR37650.1	612
1222	7.15835	36.364	29.6	1.7	0	33	21	36364	461	69	cysS	37	161	MTT20374.1	129
1223	7.15835	36.364	29.6	1.7	0	33	21	36364	461	69	cysS	37	161	OLR30151.1	129
1224	7.15835	36.364	29.6	1.7	0	33	21	36364	461	69	cysS	37	161	CDN82383.1	129
1225	7.15835	36.364	27.3	7.5	0	33	21	36364	461	194	cysS	162	94	CDN83885.1	62
1226	7.15835	36.364	27.3	7.6	0	33	21	36364	461	194	cysS	162	87	MTT21714.1	55
1227	7.15835	36.364	27.3	7.6	0	33	21	36364	461	194	cysS	162	87	OLR34807.1	55
1248	80.137	23.504	51.2	8.17e-08	6	234	170	23504	292	230	dapA	4	237	MTT18865.1	6
1249	80.137	23.504	51.2	8.17e-08	6	234	170	23504	292	230	dapA	4	237	OLR36702.1	6
1250	80.137	23.504	51.2	8.17e-08	6	234	170	23504	292	230	dapA	4	237	CDN80437.1	6
1251	25.6849	24	30	0.57	1	75	55	24000	292	123	dapA	49	78	MTT17669.1	6
1252	25.6849	24	30	0.57	1	75	55	24000	292	123	dapA	49	78	OLR36044.1	6
1253	25.6849	24	30	0.57	1	75	55	24000	292	123	dapA	49	78	CDN82846.1	6
1260	38.3212	28.571	32.3	0.1	4	105	67	28571	274	208	dapD	104	427	MTT21076.1	331
1261	38.3212	28.571	32.3	0.1	4	105	67	28571	274	208	dapD	104	427	OLR35753.1	331
1262	38.3212	28.571	32.3	0.1	4	105	67	28571	274	208	dapD	104	427	CDN84563.1	331
1263	36.8613	24.752	28.5	1.3	3	101	64	24752	274	202	dapD	114	151	OLR33573.1	51
1264	36.8613	24.752	28.5	1.3	3	101	64	24752	274	202	dapD	114	151	MTT21389.1	51
1265	36.8613	24.752	28.5	1.3	3	101	64	24752	274	202	dapD	114	151	CDN82731.1	51
1266	43.0657	27.966	28.5	1.6	5	118	60	27966	274	224	dapD	127	235	CDN84017.1	123
1267	43.0657	27.966	28.1	1.7	5	118	60	27966	274	224	dapD	127	163	MTT21796.1	51
1268	43.0657	27.966	28.1	1.7	5	118	60	27966	274	224	dapD	127	163	OLR31401.1	51
1269	23.7226	32.308	27.7	2.2	2	65	30	32308	274	216	dapD	152	81	MTT21657.1	31
1270	19.3431	30.189	28.1	2.5	1	53	32	30189	274	268	dapD	221	1739	OLR35279.1	1687
1271	23.7226	32.308	27.3	3.1	2	65	30	32308	274	216	dapD	152	62	CDN82631.1	12
1272	19.3431	30.189	28.1	3.1	1	53	32	30189	274	268	dapD	221	2425	CDN81971.1	2373
1273	28.1022	22.078	27.3	4.2	2	77	39	22078	274	248	dapD	181	389	MTT17906.1	325
1274	28.1022	22.078	27.3	4.2	2	77	39	22078	274	248	dapD	181	389	OLR36510.1	325
1275	28.1022	22.078	27.3	4.2	2	77	39	22078	274	248	dapD	181	391	CDN84868.1	327
1276	14.5985	37.5	26.9	5.4	1	40	24	37500	274	52	dapD	13	284	CDN84552.1	246
1277	14.5985	37.5	26.9	5.5	1	40	24	37500	274	52	dapD	13	273	MTT21086.1	235
1278	14.5985	37.5	26.9	5.5	1	40	24	37500	274	52	dapD	13	273	OLR35764.1	235
1279	27.7372	27.632	26.9	5.6	1	76	47	27632	274	214	dapD	139	172	MTT21179.1	105
1280	27.7372	27.632	26.9	5.6	1	76	47	27632	274	214	dapD	139	172	OLR36828.1	105
1281	27.7372	27.632	26.9	5.6	1	76	47	27632	274	214	dapD	139	172	CDN80566.1	105
1282	29.927	24.39	26.6	5.8	2	82	42	24390	274	215	dapD	134	63	MTT21177.1	2
1283	29.927	24.39	26.6	5.8	2	82	42	24390	274	215	dapD	134	63	OLR36830.1	2
1284	29.927	24.39	26.6	5.8	2	82	42	24390	274	215	dapD	134	63	CDN80568.1	2
1285	10.219	42.857	26.9	6.8	0	28	16	42857	274	205	dapD	178	658	MTT18034.1	631
1286	10.219	42.857	26.9	6.8	0	28	16	42857	274	205	dapD	178	658	OLR36384.1	631
1287	10.219	42.857	26.9	6.8	0	28	16	42857	274	205	dapD	178	658	CDN85007.1	631
1297	26.4	26.263	32.7	0.13	2	99	71	26263	375	282	dapE	184	282	MTT20524.1	186
1298	26.4	26.263	32.7	0.13	2	99	71	26263	375	282	dapE	184	282	OLR34286.1	186
1299	26.4	26.263	32.7	0.13	2	99	71	26263	375	282	dapE	184	282	CDN84808.1	186
1300	22.1333	26.506	28.9	2.1	2	83	52	26506	375	282	dapE	209	222	MTT18282.1	140
1301	22.1333	26.506	28.9	2.1	2	83	52	26506	375	282	dapE	209	222	OLR34909.1	140
1302	22.1333	26.506	28.9	2.3	2	83	52	26506	375	282	dapE	209	227	CDN82261.1	145
1303	10.1333	36.842	27.3	5.4	1	38	23	36842	375	315	dapE	278	159	MTT19609.1	123
1304	10.1333	36.842	27.3	5.4	1	38	23	36842	375	315	dapE	278	159	OLR34624.1	123
1305	10.1333	36.842	27.3	5.4	1	38	23	36842	375	315	dapE	278	159	CDN83380.1	123
1306	12.2667	32.609	26.9	9.2	2	46	22	32609	375	294	dapE	256	68	MTT20117.1	25
1307	12.2667	32.609	26.9	9.2	2	46	22	32609	375	294	dapE	256	68	OLR37464.1	25
1311	19.708	37.037	26.9	6.4	1	54	28	37037	274	253	dapF	200	156	MTT20690.1	109
1312	19.708	37.037	26.9	6.4	1	54	28	37037	274	253	dapF	200	156	OLR37675.1	109
1313	19.708	37.037	26.9	6.4	1	54	28	37037	274	253	dapF	200	156	CDN80987.1	109
1317	73.5751	22.535	28.9	0.55	5	142	89	22535	193	163	dcd	25	125	OLR35848.1	2
1318	73.5751	22.535	28.9	0.55	5	142	89	22535	193	163	dcd	25	125	CDN84398.1	2
1319	73.5751	22.535	28.5	0.56	5	142	89	22535	193	163	dcd	25	124	MTT19876.1	1
1320	15.544	50	28.9	0.76	1	30	11	50000	193	169	dcd	144	315	MTT20894.1	286
1321	15.544	50	28.9	0.76	1	30	11	50000	193	169	dcd	144	315	OLR35223.1	286
1322	15.544	50	28.9	0.76	1	30	11	50000	193	169	dcd	144	315	CDN81913.1	286
1323	47.6684	27.174	28.1	0.78	4	92	57	27174	193	137	dcd	52	124	MTT22395.1	37
1324	47.6684	27.174	28.1	1.3	4	92	57	27174	193	137	dcd	52	124	CDN82545.1	37
1325	36.7876	30.986	26.9	3.4	4	71	43	30986	193	79	dcd	12	342	MTT21398.1	275
1326	36.7876	30.986	26.9	3.4	4	71	43	30986	193	79	dcd	12	342	OLR33582.1	275
1327	36.7876	30.986	26.9	3.6	4	71	43	30986	193	79	dcd	12	364	CDN82740.1	297
1328	27.4611	32.075	26.2	6.6	0	53	36	32075	193	152	dcd	100	215	MTT22079.1	163
1329	27.4611	32.075	26.2	6.6	0	53	36	32075	193	152	dcd	100	215	OLR37331.1	163
1330	27.4611	32.075	26.2	6.6	0	53	36	32075	193	152	dcd	100	215	CDN81784.1	163
1331	48.1865	26.882	25	7.8	4	93	58	26882	193	137	dcd	46	124	MTT22010.1	41
1335	16.568	35.714	26.9	2.8	0	28	18	35714	169	42	def	15	381	MTT20583.1	354
1336	16.568	35.714	26.9	2.8	0	28	18	35714	169	42	def	15	381	OLR34345.1	354
1337	16.568	35.714	26.9	2.8	0	28	18	35714	169	42	def	15	381	CDN84747.1	354
1338	31.3609	24.528	26.9	2.9	1	53	34	24528	169	54	def	8	210	MTT20618.1	158
1339	31.3609	24.528	26.9	2.9	1	53	34	24528	169	54	def	8	210	OLR34381.1	158
1340	31.3609	24.528	26.9	2.9	1	53	34	24528	169	54	def	8	212	CDN84704.1	160
1341	14.2012	41.667	23.9	6.1	0	24	14	41667	169	140	def	117	56	CDN84294.1	33
1352	37.1429	28.571	56.6	3.52e-09	4	182	123	28571	490	385	der	205	186	MTT19435.1	11
1354	37.1429	28.571	56.6	3.52e-09	4	182	123	28571	490	385	der	205	186	OLR35492.1	11
1356	37.1429	28.571	56.6	3.52e-09	4	182	123	28571	490	385	der	205	186	CDN83209.1	11
1357	28.7755	34.752	45.8	1.59e-05	5	141	74	34752	490	131	der	2	330	MTT18080.1	197
1358	35.3061	29.48	39.7	0.001	7	173	102	29480	490	370	der	205	359	MTT18080.1	200
1359	28.7755	34.752	45.8	1.59e-05	5	141	74	34752	490	131	der	2	330	OLR36340.1	197
1360	35.3061	29.48	39.7	0.001	7	173	102	29480	490	370	der	205	359	OLR36340.1	200
1361	28.7755	34.752	45.8	1.59e-05	5	141	74	34752	490	131	der	2	330	CDN85053.1	197
1362	35.3061	29.48	39.7	0.001	7	173	102	29480	490	370	der	205	359	CDN85053.1	200
1363	25.9184	26.772	44.7	2.52e-05	3	127	85	26772	490	125	der	3	159	CDN84480.1	37
1364	42.6531	22.967	31.2	0.54	9	209	116	22967	490	395	der	205	220	CDN84480.1	39
1365	32.449	26.415	45.1	2.96e-05	7	159	103	26415	490	154	der	5	163	CDN84148.1	10
1366	19.3878	25.263	27.7	7.6	3	95	65	25263	490	294	der	203	99	CDN84148.1	8
1367	32.449	26.415	45.1	3e-05	7	159	103	26415	490	154	der	5	159	MTT19300.1	6
1368	19.3878	25.263	27.7	7	3	95	65	25263	490	294	der	203	95	MTT19300.1	4
1369	32.449	26.415	45.1	3e-05	7	159	103	26415	490	154	der	5	159	OLR33645.1	6
1370	19.3878	25.263	27.7	7	3	95	65	25263	490	294	der	203	95	OLR33645.1	4
1371	25.9184	26.772	43.5	5.62e-05	3	127	85	26772	490	125	der	3	159	CDN83658.1	37
1372	23.6735	24.138	30.4	0.9	2	116	84	24138	490	320	der	205	150	CDN83658.1	39
1373	25.9184	26.772	43.1	6.96e-05	3	127	85	26772	490	125	der	3	159	OLR35528.1	37
1374	38.3673	23.404	30	0.99	7	188	113	23404	490	371	der	205	216	OLR35528.1	39
1375	25.9184	25.984	43.1	8.32e-05	3	127	86	25984	490	125	der	3	159	OLR28742.1	37
1376	24.2857	24.37	30.4	0.88	2	119	80	24370	490	320	der	205	150	OLR28742.1	39
1377	25.9184	25.984	43.1	8.32e-05	3	127	86	25984	490	125	der	3	159	CDN85206.1	37
1378	24.2857	24.37	30.4	0.88	2	119	80	24370	490	320	der	205	150	CDN85206.1	39
1379	37.3469	30.055	39.3	0.002	9	183	109	30055	490	171	der	5	341	MTT21337.1	162
1380	37.3469	27.322	29.6	1.8	8	183	98	27322	490	368	der	205	328	MTT21337.1	162
1381	37.3469	30.055	39.3	0.002	9	183	109	30055	490	171	der	5	341	OLR34764.1	162
1382	37.3469	27.322	29.6	1.8	8	183	98	27322	490	368	der	205	328	OLR34764.1	162
1383	37.3469	30.055	39.3	0.002	9	183	109	30055	490	171	der	5	341	CDN83927.1	162
1384	37.3469	27.322	29.6	1.8	8	183	98	27322	490	368	der	205	328	CDN83927.1	162
1385	12.8571	30.159	33.9	0.016	0	63	44	30159	490	65	der	3	99	MTT22502.1	37
1386	11.4286	28.571	30	0.48	0	56	40	28571	490	260	der	205	94	MTT22502.1	39
1387	34.4898	21.893	35.4	0.018	3	169	129	21893	490	364	der	198	189	MTT20620.1	22
1388	7.14286	42.857	28.9	2.4	1	35	19	42857	490	38	der	5	63	MTT20620.1	29
1389	34.4898	21.893	35.4	0.018	3	169	129	21893	490	364	der	198	189	OLR34399.1	22
1390	7.14286	42.857	28.9	2.4	1	35	19	42857	490	38	der	5	63	OLR34399.1	29
1391	34.4898	21.893	35	0.018	3	169	129	21893	490	364	der	198	178	CDN84702.1	11
1392	7.14286	42.857	28.9	2.3	1	35	19	42857	490	38	der	5	52	CDN84702.1	18
1393	7.95918	48.718	35.8	0.018	1	39	19	48718	490	43	der	5	42	MTT20765.1	5
1394	4.08163	65	29.6	1.8	0	20	7	65000	490	222	der	203	22	MTT20765.1	3
1395	7.95918	48.718	35.8	0.018	1	39	19	48718	490	43	der	5	42	OLR37293.1	5
1396	4.08163	65	29.6	1.8	0	20	7	65000	490	222	der	203	22	OLR37293.1	3
1397	7.95918	48.718	35.8	0.018	1	39	19	48718	490	43	der	5	42	CDN81741.1	5
1398	4.08163	65	29.6	1.8	0	20	7	65000	490	222	der	203	22	CDN81741.1	3
1399	34.4898	24.852	35.8	0.027	5	169	108	24852	490	160	der	2	550	MTT21744.1	391
1400	34.4898	24.852	35.8	0.027	5	169	108	24852	490	160	der	2	550	OLR34777.1	391
1401	34.4898	24.852	35.8	0.027	5	169	108	24852	490	160	der	2	550	CDN83914.1	391
1402	12.8571	28.571	32.3	0.064	0	63	45	28571	490	65	der	3	99	MTT22378.1	37
1403	11.4286	30.357	29.6	0.58	0	56	39	30357	490	260	der	205	94	MTT22378.1	39
1404	37.7551	28.108	32.7	0.22	8	185	93	28108	490	366	der	205	174	MTT19432.1	7
1405	37.7551	28.108	32.7	0.22	8	185	93	28108	490	366	der	205	174	OLR35495.1	7
1406	37.7551	28.108	32.7	0.22	8	185	93	28108	490	366	der	205	174	CDN83212.1	7
1407	46.1224	27.876	31.6	0.45	11	226	115	27876	490	368	der	180	220	MTT19632.1	6
1408	46.1224	27.876	31.6	0.45	11	226	115	27876	490	368	der	180	220	OLR34601.1	6
1409	46.1224	27.876	31.6	0.45	11	226	115	27876	490	368	der	180	220	CDN83356.1	6
1410	10.6122	36.538	30.8	0.74	2	52	29	36538	490	141	der	90	695	CDN85504.1	648
1411	10.6122	36.538	30.8	0.75	2	52	29	36538	490	141	der	90	695	MTT22340.1	648
1412	4.69388	52.174	28.9	3.2	0	23	11	52174	490	27	der	5	391	MTT20074.1	369
1413	4.69388	52.174	28.9	3.2	0	23	11	52174	490	27	der	5	391	OLR37422.1	369
1414	4.69388	52.174	28.9	3.2	0	23	11	52174	490	27	der	5	391	CDN81252.1	369
1415	25.5102	27.2	28.1	5.9	5	125	63	27200	490	336	der	212	460	CDN84579.1	364
1416	25.5102	27.2	28.1	6.1	5	125	63	27200	490	336	der	212	452	MTT21060.1	356
1417	25.5102	27.2	28.1	6.1	5	125	63	27200	490	336	der	212	452	OLR35974.1	356
1418	7.34694	33.333	27.7	7.7	0	36	24	33333	490	236	der	201	219	MTT21342.1	184
1419	7.34694	33.333	27.7	7.7	0	36	24	33333	490	236	der	201	219	OLR34769.1	184
1420	7.34694	33.333	27.7	7.7	0	36	24	33333	490	236	der	201	219	CDN83922.1	184
1421	12.6531	29.032	27.3	7.8	2	62	41	29032	490	461	der	401	234	MTT18996.1	175
1422	12.6531	29.032	27.3	7.8	2	62	41	29032	490	461	der	401	234	OLR36573.1	175
1423	24.0816	24.576	27.3	8	5	118	64	24576	490	112	der	1	328	MTT18945.1	230
1424	24.0816	24.576	27.3	8	5	118	64	24576	490	112	der	1	328	OLR36623.1	230
1425	6.73469	42.424	27.7	8	0	33	19	42424	490	237	der	205	103	MTT22170.1	71
1426	6.73469	42.424	27.7	8	0	33	19	42424	490	237	der	205	103	OLR32803.1	71
1427	24.0816	24.576	27.3	8.1	5	118	64	24576	490	112	der	1	335	CDN85337.1	237
1428	9.18367	31.111	26.9	8.2	1	45	29	31111	490	362	der	318	142	CDN85416.1	100
1429	12.6531	29.032	27.3	8.2	2	62	41	29032	490	461	der	401	241	CDN85286.1	182
1430	10	30.612	27.3	8.2	2	49	30	30612	490	271	der	224	337	MTT22189.1	292
1431	10	30.612	27.3	8.2	2	49	30	30612	490	271	der	224	337	OLR29239.1	292
1432	10	30.612	27.3	8.2	2	49	30	30612	490	271	der	224	337	CDN85167.1	292
1433	7.34694	44.444	27.7	8.4	0	36	20	44444	490	236	der	201	103	MTT18010.1	68
1434	7.34694	44.444	27.7	8.4	0	36	20	44444	490	236	der	201	103	OLR36407.1	68
1435	7.34694	44.444	27.7	8.4	0	36	20	44444	490	236	der	201	103	CDN84979.1	68
1436	12.6531	30.645	27.3	9.5	1	62	26	30645	490	113	der	52	49	CDN85059.1	5
1440	23.1527	26.596	37	0.005	3	94	45	26596	406	94	dfp	12	175	MTT19423.1	95
1441	23.1527	26.596	37	0.005	3	94	45	26596	406	94	dfp	12	175	OLR35521.1	95
1442	23.1527	26.596	37	0.006	3	94	45	26596	406	94	dfp	12	190	CDN83220.1	110
1443	9.1133	35.135	29.3	1.7	1	37	22	35135	406	384	dfp	350	433	MTT17853.1	397
1444	9.1133	35.135	29.3	1.7	1	37	22	35135	406	384	dfp	350	433	OLR30449.1	397
1445	9.1133	35.135	29.3	1.7	1	37	22	35135	406	384	dfp	350	433	CDN83038.1	397
1449	89.6296	30.579	51.2	1.88e-09	3	121	78	30579	135	119	dicA	3	123	MTT20452.1	5
1450	89.6296	30.579	51.2	1.88e-09	3	121	78	30579	135	119	dicA	3	123	OLR34207.1	5
1451	89.6296	30.579	51.2	1.88e-09	3	121	78	30579	135	119	dicA	3	123	CDN82464.1	5
1452	71.8519	28.866	43.9	5.76e-07	1	97	66	28866	135	104	dicA	8	98	MTT18576.1	5
1453	71.8519	28.866	43.9	5.76e-07	1	97	66	28866	135	104	dicA	8	98	OLR36941.1	5
1454	71.8519	28.866	43.9	5.76e-07	1	97	66	28866	135	104	dicA	8	98	CDN81364.1	5
1455	34.0741	32.609	33.5	0.006	0	46	31	32609	135	129	dicA	84	134	MTT22434.1	89
1456	34.0741	32.609	33.5	0.006	0	46	31	32609	135	129	dicA	84	134	CDN82584.1	89
1457	34.8148	38.298	29.3	0.14	0	47	29	38298	135	58	dicA	12	98	MTT21139.1	52
1458	34.8148	38.298	29.3	0.14	0	47	29	38298	135	58	dicA	12	98	OLR35815.1	52
1459	34.8148	38.298	29.3	0.14	0	47	29	38298	135	58	dicA	12	98	CDN84498.1	52
1460	22.2222	43.333	26.6	0.74	1	30	12	43333	135	41	dicA	12	31	MTT22422.1	7
1461	22.2222	43.333	26.6	0.74	1	30	12	43333	135	41	dicA	12	31	OLR37353.1	7
1462	22.2222	43.333	26.6	0.74	1	30	12	43333	135	41	dicA	12	31	CDN81811.1	7
1463	34.0741	32.609	26.6	2	1	46	29	32609	135	116	dicA	71	66	MTT20624.1	23
1464	34.0741	32.609	26.6	2	1	46	29	32609	135	116	dicA	71	66	OLR34387.1	23
1465	34.0741	32.609	26.6	2	1	46	29	32609	135	116	dicA	71	66	CDN84695.1	23
1466	68.1481	20.652	25.8	3.2	3	92	69	20652	135	95	dicA	7	94	MTT18810.1	4
1467	68.1481	20.652	25.8	3.2	3	92	69	20652	135	95	dicA	7	94	OLR37391.1	4
1468	71.1111	20.833	25.8	4.1	3	96	72	20833	135	95	dicA	3	116	CDN81607.1	22
1469	30.3704	31.707	25	4.5	0	41	28	31707	135	47	dicA	7	44	MTT17589.1	4
1470	11.1111	66.667	25.4	4.6	0	15	5	66667	135	83	dicA	69	85	CDN84445.1	71
1477	22.0557	30.097	47	3.57e-06	2	103	69	30097	467	270	dnaA	168	199	MTT22258.1	100
1478	22.0557	30.097	47	3.57e-06	2	103	69	30097	467	270	dnaA	168	199	CDN84462.1	100
1479	23.3405	27.523	40.8	0.000328	3	109	67	27523	467	237	dnaA	135	172	MTT22346.1	70
1480	23.3405	27.523	40.8	0.000328	3	109	67	27523	467	237	dnaA	135	172	OLR37356.1	70
1481	23.3405	27.523	40.8	0.000328	3	109	67	27523	467	237	dnaA	135	172	CDN81814.1	70
1482	23.5546	26.364	37.4	0.004	4	110	64	26364	467	237	dnaA	137	171	MTT18973.1	70
1483	23.5546	26.364	37.4	0.004	4	110	64	26364	467	237	dnaA	137	171	OLR36594.1	70
1484	23.5546	26.364	37.4	0.004	4	110	64	26364	467	237	dnaA	137	171	CDN85308.1	70
1485	39.6146	24.324	33.9	0.051	4	185	113	24324	467	269	dnaA	94	200	MTT22087.1	34
1486	15.4176	23.611	31.2	0.31	1	72	53	23611	467	239	dnaA	168	108	CDN83677.1	39
1487	27.1949	25.984	29.3	2	7	127	77	25984	467	286	dnaA	168	191	MTT21296.1	74
1488	27.1949	25.984	29.3	2	7	127	77	25984	467	286	dnaA	168	191	OLR34727.1	74
1489	27.1949	25.984	29.3	2	7	127	77	25984	467	286	dnaA	168	191	CDN83968.1	74
1490	33.1906	24.516	29.3	2.7	6	155	104	24516	467	432	dnaA	287	659	MTT18664.1	509
1491	33.1906	24.516	29.3	2.7	6	155	104	24516	467	432	dnaA	287	659	CDN81453.1	509
1492	34.0471	23.899	28.9	2.8	6	159	100	23899	467	432	dnaA	287	649	OLR37026.1	499
1493	28.9079	23.704	27.7	5.6	4	135	84	23704	467	466	dnaA	335	336	MTT21232.1	218
1494	28.9079	23.704	27.7	5.6	4	135	84	23704	467	466	dnaA	335	336	OLR36777.1	218
1495	28.9079	23.704	27.7	5.6	4	135	84	23704	467	466	dnaA	335	336	CDN80513.1	218
1496	16.06	33.333	27.3	8.6	3	75	41	33333	467	288	dnaA	214	534	MTT19755.1	469
1497	16.06	33.333	27.3	8.6	3	75	41	33333	467	288	dnaA	214	534	OLR35969.1	469
1498	16.06	33.333	27.3	8.6	3	75	41	33333	467	288	dnaA	214	534	CDN84271.1	469
1499	8.35118	35.897	27.3	9.8	1	39	23	35897	467	456	dnaA	418	434	MTT18762.1	398
1500	8.35118	35.897	27.3	9.8	1	39	23	35897	467	456	dnaA	418	434	OLR37124.1	398
1501	8.35118	35.897	27.3	9.8	1	39	23	35897	467	456	dnaA	418	434	CDN81558.1	398
1508	53.0786	25.2	35.8	0.02	13	250	162	25200	471	460	dnaB	220	438	OLR32147.1	205
1509	6.36943	30	27.7	7.4	0	30	21	30000	471	77	dnaB	48	551	MTT20317.1	522
1510	6.36943	30	27.7	7.4	0	30	21	30000	471	77	dnaB	48	551	OLR35681.1	522
1511	6.36943	30	27.7	7.4	0	30	21	30000	471	77	dnaB	48	551	CDN83817.1	522
1512	9.97877	31.915	27.3	9.4	1	47	28	31915	471	457	dnaB	411	591	MTT21957.1	549
1513	9.97877	31.915	27.3	9.7	1	47	28	31915	471	457	dnaB	411	591	OLR35549.1	549
1520	47.7551	25.641	46.2	1.96e-06	3	117	83	25641	245	218	dnaC	103	215	MTT22087.1	102
1521	58.7755	27.083	42.7	2.95e-05	5	144	88	27083	245	237	dnaC	103	236	MTT22258.1	101
1522	58.7755	27.083	42.7	2.95e-05	5	144	88	27083	245	237	dnaC	103	236	CDN84462.1	101
1523	28.5714	34.286	38.1	0.000585	1	70	45	34286	245	172	dnaC	103	116	MTT22302.1	48
1524	28.5714	34.286	38.5	0.000652	1	70	45	34286	245	172	dnaC	103	175	CDN82649.1	107
1525	44.898	26.364	37.4	0.002	4	110	64	26364	245	171	dnaC	70	237	MTT21105.1	137
1526	44.898	26.364	37.4	0.002	4	110	64	26364	245	171	dnaC	70	237	OLR35781.1	137
1527	44.898	26.364	37.4	0.002	4	110	64	26364	245	171	dnaC	70	237	CDN84535.1	137
1528	30.6122	26.667	33.5	0.05	1	75	53	26667	245	139	dnaC	65	638	MTT19752.1	566
1529	30.6122	26.667	33.5	0.05	1	75	53	26667	245	139	dnaC	65	638	OLR31784.1	566
1530	30.6122	26.667	33.1	0.051	1	75	53	26667	245	139	dnaC	65	642	CDN83232.1	570
1531	35.102	23.256	30.4	0.24	1	86	64	23256	245	191	dnaC	106	126	CDN83677.1	43
1532	7.7551	68.421	28.1	1.1	1	19	4	68421	245	31	dnaC	15	131	CDN82553.1	113
1533	7.7551	68.421	28.1	1.1	1	19	4	68421	245	31	dnaC	15	132	MTT22135.1	114
1534	26.5306	30.769	28.5	1.7	2	65	43	30769	245	120	dnaC	57	71	MTT20068.1	8
1535	26.5306	30.769	28.5	1.7	2	65	43	30769	245	120	dnaC	57	71	OLR37417.1	8
1536	26.5306	30.769	28.5	1.7	2	65	43	30769	245	120	dnaC	57	71	CDN81258.1	8
1537	29.3878	34.722	28.1	1.8	3	72	30	34722	245	171	dnaC	102	115	MTT20357.1	59
1538	29.3878	34.722	28.1	1.8	3	72	30	34722	245	171	dnaC	102	115	OLR30136.1	59
1539	29.3878	34.722	28.1	1.8	3	72	30	34722	245	171	dnaC	102	115	CDN82367.1	59
1540	42.0408	26.214	27.7	2.4	2	103	58	26214	245	138	dnaC	53	131	OLR29890.1	30
1541	12.6531	41.935	27.3	3.1	0	31	18	41935	245	133	dnaC	103	37	MTT20821.1	7
1542	12.6531	41.935	27.3	3.1	0	31	18	41935	245	133	dnaC	103	37	OLR37233.1	7
1543	12.6531	41.935	27.3	3.1	0	31	18	41935	245	133	dnaC	103	37	CDN81674.1	7
1544	17.1429	33.333	25.8	3.8	1	42	25	33333	245	206	dnaC	165	43	OLR37289.1	5
1545	17.1429	33.333	25.8	3.8	1	42	25	33333	245	206	dnaC	165	43	CDN81736.1	5
1546	24.898	32.787	26.9	4.4	2	61	36	32787	245	130	dnaC	72	66	OLR35516.1	9
1547	24.898	32.787	26.6	5	2	61	36	32787	245	130	dnaC	72	89	MTT19503.1	32
1548	24.898	32.787	26.6	5	2	61	36	32787	245	130	dnaC	72	89	CDN83139.1	32
1553	5	31.034	32.3	0.8	1	58	36	31034	1160	118	dnaE	61	124	MTT19984.1	71
1554	5	31.034	32.3	0.8	1	58	36	31034	1160	118	dnaE	61	124	OLR35089.1	71
1555	5	31.034	32.3	0.8	1	58	36	31034	1160	118	dnaE	61	124	CDN83512.1	71
1556	12.5862	24.658	30.4	2.4	6	146	93	24658	1160	478	dnaE	349	316	CDN85177.1	172
1557	12.5862	24.658	30.4	2.5	6	146	93	24658	1160	478	dnaE	349	316	OLR29083.1	172
1558	3.53448	34.146	26.9	3.5	0	41	27	34146	1160	1032	dnaE	992	45	CDN82575.1	5
1559	6.37931	32.432	30	3.7	3	74	45	32432	1160	556	dnaE	483	332	MTT18454.1	264
1560	6.37931	32.432	30	3.7	3	74	45	32432	1160	556	dnaE	483	332	OLR34438.1	264
1561	3.53448	34.146	26.9	4.1	0	41	27	34146	1160	1032	dnaE	992	45	MTT22501.1	5
1562	6.37931	32.432	29.6	4.2	3	74	45	32432	1160	556	dnaE	483	343	CDN82080.1	275
1563	8.27586	25	29.3	4.9	4	96	55	25000	1160	996	dnaE	918	96	MTT18339.1	1
1564	8.27586	25	29.3	4.9	4	96	55	25000	1160	996	dnaE	918	96	OLR34851.1	1
1565	8.27586	25	29.3	4.9	4	96	55	25000	1160	996	dnaE	918	96	CDN82201.1	1
1566	4.31034	30	27.3	4.9	0	50	35	30000	1160	1032	dnaE	983	64	OLR37360.1	15
1567	4.31034	30	27.3	4.9	0	50	35	30000	1160	1032	dnaE	983	64	CDN81818.1	15
1568	3.96552	34.783	29.6	5.3	0	46	30	34783	1160	813	dnaE	768	134	MTT19783.1	89
1569	3.96552	34.783	29.6	5.3	0	46	30	34783	1160	813	dnaE	768	134	OLR35941.1	89
1570	3.96552	34.783	29.6	5.4	0	46	30	34783	1160	813	dnaE	768	145	CDN84302.1	100
1571	4.48276	25	26.6	8.1	0	52	39	25000	1160	1032	dnaE	981	64	MTT18917.1	13
1572	4.48276	25	26.6	8.1	0	52	39	25000	1160	1032	dnaE	981	64	CDN80384.1	13
1573	5.25862	34.426	28.9	8.4	2	61	38	34426	1160	420	dnaE	361	364	MTT21465.1	305
1574	5.25862	34.426	28.9	8.4	2	61	38	34426	1160	420	dnaE	361	364	OLR37583.1	305
1575	5.25862	34.426	28.9	8.4	2	61	38	34426	1160	420	dnaE	361	364	CDN81083.1	305
1579	10.4991	32.787	30	1.6	1	61	38	32787	581	152	dnaG	95	264	MTT19424.1	204
1580	10.4991	32.787	30	1.6	1	61	38	32787	581	152	dnaG	95	264	OLR35503.1	204
1581	10.4991	32.787	30	1.6	1	61	38	32787	581	152	dnaG	95	264	CDN83219.1	204
1582	17.0396	29.293	28.5	4.4	3	99	61	29293	581	462	dnaG	373	168	MTT20295.1	70
1583	17.0396	29.293	28.5	4.4	3	99	61	29293	581	462	dnaG	373	171	OLR35662.1	73
1584	17.0396	29.293	28.5	4.4	3	99	61	29293	581	462	dnaG	373	171	CDN83795.1	73
1585	5.16351	30	27.7	9.3	0	30	21	30000	581	551	dnaG	522	89	CDN84901.1	60
1586	5.16351	30	27.7	9.7	0	30	21	30000	581	551	dnaG	522	77	MTT17935.1	48
1587	5.16351	30	27.7	9.7	0	30	21	30000	581	551	dnaG	522	77	OLR36480.1	48
1591	22.4044	28.049	33.1	0.093	3	82	54	28049	366	326	dnaN	248	468	MTT17933.1	389
1592	22.4044	28.049	33.1	0.093	3	82	54	28049	366	326	dnaN	248	468	OLR36482.1	389
1593	22.4044	28.049	33.1	0.093	3	82	54	28049	366	326	dnaN	248	468	CDN84899.1	389
1594	22.1311	27.16	30.8	0.51	3	81	56	27160	366	220	dnaN	140	200	MTT22345.1	123
1595	22.1311	27.16	30.8	0.56	3	81	56	27160	366	220	dnaN	140	537	CDN82543.1	460
1596	25.6831	31.915	28.9	2.2	6	94	42	31915	366	84	dnaN	2	209	OLR36468.1	127
1597	25.6831	31.915	28.9	2.2	6	94	42	31915	366	84	dnaN	2	209	CDN84913.1	127
1598	25.6831	31.915	28.9	2.3	6	94	42	31915	366	84	dnaN	2	209	MTT17947.1	127
1599	22.1311	25.926	28.5	2.9	3	81	57	25926	366	220	dnaN	140	537	OLR37207.1	460
1600	22.1311	25.926	28.5	2.9	3	81	57	25926	366	220	dnaN	140	537	CDN81646.1	460
1601	22.1311	25.926	28.5	2.9	3	81	57	25926	366	220	dnaN	140	200	MTT20846.1	123
1602	24.0437	30.682	26.9	5.4	4	88	41	30682	366	163	dnaN	77	83	MTT22483.1	15
1606	11.1732	70	36.2	0.002	0	20	6	70000	179	179	dnaT	160	320	OLR37355.1	301
1607	11.1732	70	36.2	0.002	0	20	6	70000	179	179	dnaT	160	320	CDN82581.1	301
1608	11.1732	70	36.2	0.002	0	20	6	70000	179	179	dnaT	160	295	CDN81813.1	276
1609	22.3464	35	29.6	0.34	1	40	25	35000	179	92	dnaT	54	84	MTT19842.1	45
1610	22.3464	35	29.6	0.34	1	40	25	35000	179	92	dnaT	54	84	OLR35882.1	45
1611	22.3464	35	29.6	0.34	1	40	25	35000	179	92	dnaT	54	84	CDN84363.1	45
1612	18.9944	41.176	25.8	7.5	2	34	15	41176	179	108	dnaT	75	664	MTT18526.1	636
1613	18.9944	41.176	25.8	7.5	2	34	15	41176	179	108	dnaT	75	664	OLR36894.1	636
1614	18.9944	41.176	25.8	7.5	2	34	15	41176	179	108	dnaT	75	664	CDN81313.1	636
1615	46.9274	26.19	25.4	9.3	3	84	53	26190	179	162	dnaT	88	383	MTT20090.1	300
1616	46.9274	26.19	25.4	9.3	3	84	53	26190	179	162	dnaT	88	383	OLR37438.1	300
1626	8.70918	33.929	33.1	0.25	2	56	29	33929	643	65	dnaX	18	515	MTT20077.1	460
1627	8.70918	33.929	33.1	0.25	2	56	29	33929	643	65	dnaX	18	515	OLR37425.1	460
1628	8.70918	33.929	33.1	0.26	2	56	29	33929	643	65	dnaX	18	520	CDN81249.1	465
1629	21.1509	25	30.4	1.7	3	136	85	25000	643	145	dnaX	18	696	MTT19752.1	570
1630	21.1509	25	30.4	1.7	3	136	85	25000	643	145	dnaX	18	696	OLR31784.1	570
1631	21.1509	25	30.4	1.7	3	136	85	25000	643	145	dnaX	18	700	CDN83232.1	574
1632	4.51011	51.724	29.6	1.9	0	29	14	51724	643	42	dnaX	14	158	MTT20180.1	130
1633	4.51011	51.724	29.6	1.9	0	29	14	51724	643	42	dnaX	14	158	OLR37526.1	130
1634	4.51011	51.724	29.6	1.9	0	29	14	51724	643	42	dnaX	14	158	CDN81144.1	130
1635	10.7309	31.884	28.1	2.3	2	69	44	31884	643	169	dnaX	104	76	MTT21049.1	8
1636	10.7309	31.884	28.1	2.3	2	69	44	31884	643	169	dnaX	104	76	OLR34040.1	8
1637	10.7309	31.884	28.1	2.3	2	69	44	31884	643	169	dnaX	104	76	CDN84590.1	8
1638	11.6641	28	28.5	4.5	2	75	48	28000	643	73	dnaX	4	90	MTT20357.1	17
1639	11.6641	28	28.5	4.5	2	75	48	28000	643	73	dnaX	4	90	OLR30136.1	17
1640	11.6641	28	28.5	4.5	2	75	48	28000	643	73	dnaX	4	90	CDN82367.1	17
1641	8.70918	32.143	28.5	5	2	56	25	32143	643	81	dnaX	39	97	MTT20257.1	42
1642	8.70918	32.143	28.5	5	2	56	25	32143	643	81	dnaX	39	97	OLR35621.1	42
1643	8.70918	32.143	28.5	5	2	56	25	32143	643	81	dnaX	39	97	CDN83755.1	42
1644	16.9518	26.606	28.1	7.7	3	109	62	26606	643	137	dnaX	29	195	MTT19088.1	105
1645	16.9518	26.606	28.1	7.7	3	109	62	26606	643	137	dnaX	29	195	OLR37827.1	105
1646	16.9518	26.606	28.1	7.7	3	109	62	26606	643	137	dnaX	29	195	CDN80828.1	105
1647	10.8865	31.429	28.1	8.2	2	70	44	31429	643	581	dnaX	513	464	CDN85067.1	398
1648	10.8865	31.429	28.1	8.4	2	70	44	31429	643	581	dnaX	513	458	MTT18094.1	392
1649	10.8865	31.429	28.1	8.4	2	70	44	31429	643	581	dnaX	513	458	OLR36326.1	392
1653	96.0265	22.759	27.7	0.83	6	145	85	22759	151	124	dut	1	163	MTT21400.1	25
1654	96.0265	22.759	27.7	0.83	6	145	85	22759	151	124	dut	1	163	OLR33584.1	25
1655	96.0265	22.759	27.7	0.83	6	145	85	22759	151	124	dut	1	163	CDN82742.1	25
1656	36.4238	30.909	26.6	2.8	1	55	37	30909	151	90	dut	36	475	MTT21011.1	422
1657	36.4238	30.909	26.6	2.8	1	55	37	30909	151	90	dut	36	475	OLR34078.1	422
1658	36.4238	30.909	26.6	2.8	1	55	37	30909	151	90	dut	36	475	CDN84627.1	422
1659	35.0993	28.302	25.4	6.6	3	53	31	28302	151	53	dut	1	171	MTT18359.1	126
1660	35.0993	28.302	25.4	6.6	3	53	31	28302	151	53	dut	1	171	OLR34529.1	126
1661	35.0993	28.302	25.4	6.6	3	53	31	28302	151	53	dut	1	171	CDN82180.1	126
1665	8.54271	38.235	28.1	3.1	0	34	21	38235	398	56	dxr	23	36	MTT21927.1	3
1666	8.54271	38.235	28.1	3.1	0	34	21	38235	398	56	dxr	23	36	OLR30013.1	3
1667	8.54271	38.235	28.1	3.1	0	34	21	38235	398	56	dxr	23	36	CDN84837.1	3
1668	19.8492	25.316	28.1	4.2	1	79	53	25316	398	154	dxr	82	148	MTT19485.1	70
1669	19.8492	25.316	28.1	4.2	1	79	53	25316	398	154	dxr	82	148	OLR35518.1	70
1670	19.598	25.641	28.1	4.3	1	78	52	25641	398	153	dxr	82	160	CDN83158.1	83
1677	30.6452	24.737	52.8	1.66e-07	3	190	138	24737	620	535	dxs	351	580	MTT19524.1	391
1678	30.6452	24.737	52.8	1.66e-07	3	190	138	24737	620	535	dxs	351	580	OLR35405.1	391
1679	30.6452	24.737	52.8	1.86e-07	3	190	138	24737	620	535	dxs	351	601	CDN83119.1	412
1680	34.1935	25.472	51.6	3.5e-07	6	212	150	25472	620	554	dxs	350	601	MTT19939.1	391
1681	34.1935	25.472	51.6	3.5e-07	6	212	150	25472	620	554	dxs	350	601	OLR35129.1	391
1682	32.0968	26.131	51.6	3.61e-07	6	199	139	26131	620	554	dxs	363	611	CDN83558.1	414
1683	27.7419	26.744	47	4.81e-06	5	172	109	26744	620	180	dxs	26	180	MTT20656.1	9
1684	27.7419	26.744	47	4.81e-06	5	172	109	26744	620	180	dxs	26	180	OLR37709.1	9
1685	27.7419	26.744	47	4.81e-06	5	172	109	26744	620	180	dxs	26	180	CDN80952.1	9
1686	20.8065	27.132	39.7	0.002	4	129	90	27132	620	478	dxs	353	520	MTT20983.1	393
1687	20.8065	27.132	39.7	0.002	4	129	90	27132	620	478	dxs	353	520	OLR34104.1	393
1688	20.8065	27.132	39.7	0.002	4	129	90	27132	620	478	dxs	353	520	CDN84655.1	393
1689	10.4839	30.769	28.5	4.9	1	65	43	30769	620	373	dxs	311	207	MTT19575.1	143
1690	10.4839	30.769	28.5	4.9	1	65	43	30769	620	373	dxs	311	207	OLR34659.1	143
1691	10.4839	30.769	28.5	4.9	1	65	43	30769	620	373	dxs	311	207	CDN83418.1	143
1692	11.129	31.884	28.9	5	3	69	37	31884	620	421	dxs	353	59	OLR37499.1	1
1693	10.4839	33.846	28.1	6.8	3	65	33	33846	620	417	dxs	353	55	MTT20154.1	1
1694	10.4839	33.846	28.1	6.8	3	65	33	33846	620	417	dxs	353	55	CDN81172.1	1
1695	7.41935	36.957	27.7	7.3	1	46	21	36957	620	143	dxs	98	82	MTT21569.1	45
1696	7.41935	36.957	27.7	7.3	1	46	21	36957	620	143	dxs	98	82	OLR35285.1	45
1697	7.41935	36.957	27.7	7.3	1	46	21	36957	620	143	dxs	98	82	CDN81978.1	45
1701	11.5741	34	31.6	0.35	2	50	28	34000	432	305	eno	259	491	MTT21037.1	444
1702	11.5741	34	31.6	0.35	2	50	28	34000	432	305	eno	259	491	OLR34051.1	444
1703	11.5741	34	31.6	0.35	2	50	28	34000	432	305	eno	259	491	CDN84600.1	444
1704	12.963	33.929	30	1.1	2	56	34	33929	432	390	eno	337	395	MTT21077.1	341
1705	12.963	33.929	30	1.1	2	56	34	33929	432	390	eno	337	395	OLR35754.1	341
1706	12.963	33.929	30	1.1	2	56	34	33929	432	390	eno	337	395	CDN84562.1	341
1707	22.4537	28.866	27.3	5.2	2	97	61	28866	432	367	eno	277	107	MTT20540.1	13
1708	22.4537	28.866	27.3	5.2	2	97	61	28866	432	367	eno	277	107	OLR34302.1	13
1709	22.4537	28.866	27.3	5.2	2	97	61	28866	432	367	eno	277	107	CDN84792.1	13
1710	3.47222	73.333	27.3	9.4	0	15	4	73333	432	369	eno	355	36	OLR32130.1	22
1715	60.4651	28.571	56.6	2.16e-09	4	182	123	28571	301	186	era	11	385	MTT19485.1	205
1717	60.4651	28.571	56.6	2.16e-09	4	182	123	28571	301	186	era	11	385	OLR35518.1	205
1719	60.4651	28.571	56.6	2.11e-09	4	182	123	28571	301	186	era	11	398	CDN83158.1	218
1720	55.4817	32.335	57.4	1.18e-09	6	167	102	32335	301	176	era	11	375	MTT21099.1	219
1721	55.4817	32.335	57.4	1.18e-09	6	167	102	32335	301	176	era	11	375	OLR35776.1	219
1722	55.4817	32.335	57.4	1.18e-09	6	167	102	32335	301	176	era	11	375	CDN84540.1	219
1723	57.1429	22.093	45.1	1.45e-05	7	172	113	22093	301	172	era	11	170	CDN84148.1	10
1724	57.1429	22.093	45.1	1.5e-05	7	172	113	22093	301	172	era	11	166	MTT19300.1	6
1725	57.1429	22.093	45.1	1.5e-05	7	172	113	22093	301	172	era	11	166	OLR33645.1	6
1726	58.1395	28	35	0.017	9	175	89	28000	301	161	era	11	169	MTT20613.1	8
1727	58.1395	28	35	0.017	9	175	89	28000	301	161	era	11	169	OLR34377.1	8
1728	58.1395	28	35	0.017	9	175	89	28000	301	161	era	11	169	CDN84709.1	8
1729	62.1262	21.925	31.6	0.19	7	187	118	21925	301	175	era	11	219	OLR35528.1	39
1730	6.97674	71.429	30.8	0.37	1	21	3	71429	301	28	era	8	22	MTT20765.1	5
1731	6.97674	71.429	30.8	0.37	1	21	3	71429	301	28	era	8	22	OLR37293.1	5
1732	6.97674	71.429	30.8	0.37	1	21	3	71429	301	28	era	8	22	CDN81741.1	5
1733	18.2724	36.364	30	0.46	2	55	33	36364	301	65	era	11	70	CDN84702.1	18
1734	18.2724	36.364	30	0.55	2	55	33	36364	301	65	era	11	81	MTT20620.1	29
1735	18.2724	36.364	30	0.55	2	55	33	36364	301	65	era	11	81	OLR34399.1	29
1736	74.0864	21.525	29.6	0.75	9	223	148	21525	301	208	era	6	249	OLR28742.1	34
1737	74.0864	21.525	29.6	0.75	9	223	148	21525	301	208	era	6	249	CDN85206.1	34
1738	22.5914	27.941	29.6	1.1	2	68	42	27941	301	78	era	11	131	MTT22170.1	71
1739	22.5914	27.941	29.6	1.1	2	68	42	27941	301	78	era	11	131	OLR32803.1	71
1740	74.0864	21.973	29.3	1.2	10	223	137	21973	301	208	era	11	249	CDN83658.1	39
1741	51.1628	21.429	28.9	1.3	4	154	88	21429	301	261	era	141	174	OLR27771.1	21
1742	23.9203	30.556	28.9	1.3	3	72	40	30556	301	66	era	3	281	CDN85044.1	212
1743	23.9203	30.556	28.9	1.3	3	72	40	30556	301	66	era	3	270	MTT18070.1	201
1744	23.9203	30.556	28.9	1.3	3	72	40	30556	301	66	era	3	270	OLR36348.1	201
1745	51.1628	21.429	28.5	1.6	4	154	88	21429	301	261	era	141	174	CDN85403.1	21
1746	51.1628	21.429	28.5	1.7	4	154	88	21429	301	261	era	141	174	MTT22458.1	21
1747	51.1628	21.429	28.5	1.7	4	154	88	21429	301	261	era	141	174	CDN85480.1	21
1748	51.1628	21.429	28.5	1.7	4	154	88	21429	301	261	era	141	174	CDN85472.1	21
1749	51.1628	21.429	28.5	1.7	4	154	88	21429	301	261	era	141	174	CDN85468.1	21
1750	51.1628	21.429	28.5	1.7	4	154	88	21429	301	261	era	141	174	CDN85464.1	21
1751	51.1628	21.429	28.5	1.7	4	154	88	21429	301	261	era	141	174	CDN85450.1	21
1752	51.1628	21.429	28.5	1.7	4	154	88	21429	301	261	era	141	174	CDN85438.1	21
1753	51.1628	21.429	28.5	1.7	4	154	88	21429	301	261	era	141	174	CDN85396.1	21
1754	75.0831	21.681	28.5	1.9	10	226	144	21681	301	208	era	6	249	CDN84480.1	34
1755	6.97674	61.905	28.1	2.2	0	21	8	61905	301	30	era	10	59	MTT18617.1	39
1756	6.97674	61.905	28.1	2.2	0	21	8	61905	301	30	era	10	59	OLR36983.1	39
1757	6.97674	61.905	28.1	2.2	0	21	8	61905	301	30	era	10	59	CDN81406.1	39
1758	11.6279	42.857	28.5	2.5	0	35	20	42857	301	41	era	7	328	MTT19498.1	294
1759	11.6279	42.857	28.5	2.5	0	35	20	42857	301	41	era	7	328	OLR35431.1	294
1760	11.6279	42.857	28.5	2.5	0	35	20	42857	301	41	era	7	330	CDN83144.1	296
1761	19.9336	31.667	26.9	2.7	3	60	33	31667	301	66	era	11	94	MTT22378.1	39
1762	35.5482	19.626	28.1	3.1	1	107	84	19626	301	284	era	180	768	MTT22260.1	662
1763	35.5482	19.626	28.1	3.1	1	107	84	19626	301	284	era	180	768	CDN84465.1	662
1764	42.5249	27.344	27.7	3.3	5	128	67	27344	301	129	era	10	144	MTT20664.1	35
1765	42.5249	27.344	27.7	3.3	5	128	67	27344	301	129	era	10	144	OLR37701.1	35
1766	42.5249	27.344	27.7	3.3	5	128	67	27344	301	129	era	10	144	CDN80961.1	35
1767	18.9369	31.579	26.2	5.9	2	57	37	31579	301	66	era	11	94	MTT22502.1	39
1768	23.2558	27.143	26.9	7	2	70	44	27143	301	80	era	11	134	MTT18010.1	72
1769	23.2558	27.143	26.9	7	2	70	44	27143	301	80	era	11	134	OLR36407.1	72
1770	23.2558	27.143	26.9	7	2	70	44	27143	301	80	era	11	134	CDN84979.1	72
1771	41.196	24.194	26.6	7.8	4	124	84	24194	301	127	era	11	320	MTT18080.1	200
1772	41.196	24.194	26.6	7.8	4	124	84	24194	301	127	era	11	320	OLR36340.1	200
1773	41.196	24.194	26.6	7.8	4	124	84	24194	301	127	era	11	320	CDN85053.1	200
1774	49.8339	20	26.6	9.6	7	150	94	20000	301	140	era	11	159	MTT18961.1	16
1775	49.8339	20	26.6	9.6	7	150	94	20000	301	140	era	11	159	OLR36606.1	16
1776	49.8339	20	26.6	9.6	7	150	94	20000	301	140	era	11	159	CDN85320.1	16
1786	85.0877	24.742	37	0.000282	2	97	70	24742	114	103	erpA	9	97	MTT19305.1	2
1787	85.0877	24.742	37	0.000282	2	97	70	24742	114	103	erpA	9	97	OLR33641.1	2
1788	85.0877	24.742	37	0.000282	2	97	70	24742	114	103	erpA	9	97	CDN84153.1	2
1789	26.3158	40	26.9	1.3	0	30	18	40000	114	82	erpA	53	434	MTT19601.1	405
1790	26.3158	40	26.9	1.3	0	30	18	40000	114	82	erpA	53	434	OLR34633.1	405
1791	26.3158	40	26.9	1.3	0	30	18	40000	114	82	erpA	53	434	CDN83389.1	405
1792	21.0526	41.667	26.2	2.4	0	24	14	41667	114	103	erpA	80	148	MTT19323.1	125
1793	21.0526	41.667	26.2	2.4	0	24	14	41667	114	103	erpA	80	148	OLR33623.1	125
1794	21.0526	41.667	26.2	2.4	0	24	14	41667	114	103	erpA	80	148	CDN84171.1	125
1795	20.1754	43.478	25	4.8	0	23	13	43478	114	100	erpA	78	89	MTT19016.1	67
1796	20.1754	43.478	25	4.8	0	23	13	43478	114	100	erpA	78	89	OLR36553.1	67
1797	20.1754	43.478	25	4.8	0	23	13	43478	114	100	erpA	78	89	CDN85264.1	67
1798	33.3333	39.474	24.3	8.3	2	38	21	39474	114	103	erpA	67	107	MTT17811.1	71
1799	33.3333	39.474	24.3	8.3	2	38	21	39474	114	103	erpA	67	107	OLR36189.1	71
1800	33.3333	39.474	24.3	8.3	2	38	21	39474	114	103	erpA	67	107	CDN82994.1	71
1804	76.7442	29.545	41.2	2.26e-05	7	132	73	29545	172	159	fabA	35	142	MTT21178.1	24
1805	76.7442	29.545	41.2	2.26e-05	7	132	73	29545	172	159	fabA	35	142	OLR36829.1	24
1806	75.5814	28.462	39.7	8.97e-05	6	130	77	28462	172	159	fabA	35	173	CDN80567.1	55
1807	16.8605	44.828	25.8	7.2	1	29	15	44828	172	118	fabA	91	372	MTT19887.1	344
1808	16.8605	44.828	25.8	7.2	1	29	15	44828	172	118	fabA	91	372	OLR35837.1	344
1809	16.8605	44.828	25.8	7.2	1	29	15	44828	172	118	fabA	91	383	CDN84409.1	355
1819	11.5764	36.17	33.9	0.064	0	47	30	36170	406	191	fabB	145	127	MTT17835.1	81
1820	11.5764	36.17	33.9	0.064	0	47	30	36170	406	191	fabB	145	127	OLR36213.1	81
1821	11.5764	36.17	33.9	0.064	0	47	30	36170	406	191	fabB	145	127	CDN83018.1	81
1822	21.4286	34.483	30.8	0.54	4	87	50	34483	406	165	fabB	83	161	MTT19551.1	78
1823	21.4286	34.483	30.8	0.54	4	87	50	34483	406	165	fabB	83	161	OLR35380.1	78
1824	21.4286	34.483	30.8	0.54	4	87	50	34483	406	165	fabB	83	161	CDN83091.1	78
1825	22.9064	31.183	28.9	1.7	5	93	47	31183	406	91	fabB	9	92	MTT21004.1	7
1826	22.9064	31.183	28.9	1.7	5	93	47	31183	406	91	fabB	9	92	OLR34084.1	7
1827	22.9064	31.183	28.9	1.7	5	93	47	31183	406	91	fabB	9	92	CDN84634.1	7
1828	8.867	36.111	28.5	3.4	0	36	23	36111	406	193	fabB	158	119	CDN83483.1	84
1829	8.867	36.111	28.1	3.5	0	36	23	36111	406	193	fabB	158	118	MTT20014.1	83
1830	8.867	36.111	28.1	3.6	0	36	23	36111	406	193	fabB	158	118	OLR35059.1	83
1831	21.6749	26.136	27.7	3.9	3	88	58	26136	406	135	fabB	49	113	MTT19879.1	32
1832	21.6749	26.136	27.7	3.9	3	88	58	26136	406	135	fabB	49	113	OLR35845.1	32
1833	21.6749	26.136	27.7	4.4	3	88	58	26136	406	135	fabB	49	121	CDN84401.1	40
1834	16.2562	30.303	27.3	8	3	66	30	30303	406	317	fabB	252	420	MTT19446.1	371
1835	16.2562	30.303	27.3	8	3	66	30	30303	406	317	fabB	252	420	OLR35481.1	371
1836	16.2562	30.303	27.3	8.3	3	66	30	30303	406	317	fabB	252	405	CDN83199.1	356
1843	20.0647	29.032	27.3	2	1	62	43	29032	309	89	fabD	28	61	MTT20421.1	1
1844	20.0647	29.032	27.3	2	1	62	43	29032	309	89	fabD	28	61	OLR34177.1	1
1845	20.0647	29.032	27.3	2	1	62	43	29032	309	89	fabD	28	61	CDN82432.1	1
1846	11.6505	36.111	27.3	5.2	0	36	23	36111	309	269	fabD	234	158	MTT22184.1	123
1847	11.6505	36.111	27.3	5.2	0	36	23	36111	309	269	fabD	234	158	OLR34673.1	123
1848	11.6505	36.111	27.3	5.2	0	36	23	36111	309	269	fabD	234	158	CDN83432.1	123
1903	53.6885	24.427	56.6	1.14e-09	1	131	98	24427	244	188	fabG	58	442	CDN83685.1	313
1904	102.459	25.2	52	1.99e-08	8	250	170	25200	244	241	fabG	5	251	MTT20885.1	6
1905	102.459	25.2	52	1.99e-08	8	250	170	25200	244	241	fabG	5	251	OLR35213.1	6
1906	102.459	25.2	52	1.99e-08	8	250	170	25200	244	241	fabG	5	251	CDN81903.1	6
1907	70.4918	24.419	45.4	7.06e-06	4	172	117	24419	244	176	fabG	9	1723	MTT21682.1	1561
1908	70.4918	24.419	45.4	7.06e-06	4	172	117	24419	244	176	fabG	9	1723	OLR32763.1	1561
1909	70.4918	24.419	45.4	7.06e-06	4	172	117	24419	244	176	fabG	9	1723	CDN82602.1	1561
1910	26.2295	34.375	30.8	0.28	2	64	31	34375	244	74	fabG	17	114	MTT20124.1	56
1911	26.2295	34.375	30.8	0.28	2	64	31	34375	244	74	fabG	17	114	OLR37470.1	56
1912	26.2295	34.375	30.8	0.28	2	64	31	34375	244	74	fabG	17	114	CDN81201.1	56
1913	22.1311	29.63	29.3	0.88	0	54	38	29630	244	189	fabG	136	147	MTT18918.1	94
1914	22.1311	29.63	29.3	0.88	0	54	38	29630	244	189	fabG	136	147	OLR36649.1	94
1915	22.1311	29.63	29.3	0.88	0	54	38	29630	244	189	fabG	136	147	CDN80383.1	94
1916	12.7049	45.161	28.1	2	0	31	17	45161	244	39	fabG	9	55	CDN81234.1	25
1917	12.7049	45.161	28.1	2.2	0	31	17	45161	244	39	fabG	9	34	MTT20091.1	4
1918	12.7049	45.161	28.1	2.2	0	31	17	45161	244	39	fabG	9	34	OLR38047.1	4
1919	18.8525	36.957	27.7	2.5	2	46	25	36957	244	101	fabG	59	325	MTT19806.1	281
1920	18.8525	36.957	27.7	2.5	2	46	25	36957	244	101	fabG	59	325	OLR35918.1	281
1921	18.8525	36.957	27.7	2.5	2	46	25	36957	244	101	fabG	59	325	CDN84325.1	281
1922	22.1311	29.63	26.9	5.3	0	54	38	29630	244	75	fabG	22	290	MTT22260.1	237
1923	22.1311	29.63	26.9	5.3	0	54	38	29630	244	75	fabG	22	290	CDN84465.1	237
1924	16.8033	36.585	26.2	8	1	41	25	36585	244	241	fabG	201	47	MTT19350.1	8
1925	16.8033	36.585	26.2	8	1	41	25	36585	244	241	fabG	201	47	OLR32874.1	8
1926	16.8033	36.585	26.2	8	1	41	25	36585	244	241	fabG	201	47	CDN84200.1	8
1927	11.4754	39.286	26.2	9.6	0	28	17	39286	244	91	fabG	64	254	MTT20038.1	227
1928	11.4754	39.286	26.2	9.6	0	28	17	39286	244	91	fabG	64	254	OLR35034.1	227
1929	11.4754	39.286	26.2	9.6	0	28	17	39286	244	91	fabG	64	257	CDN83458.1	230
1936	9.77918	29.032	28.1	2.7	0	31	22	29032	317	253	fabH	223	49	MTT19185.1	19
1937	9.77918	29.032	28.1	2.7	0	31	22	29032	317	253	fabH	223	49	OLR37921.1	19
1938	9.77918	29.032	28.1	2.7	0	31	22	29032	317	253	fabH	223	49	CDN80724.1	19
1957	95.4198	25.6	53.9	5.35e-09	8	250	169	25600	262	251	fabI	6	241	MTT18754.1	5
1958	95.4198	25.6	53.9	5.35e-09	8	250	169	25600	262	251	fabI	6	241	OLR37116.1	5
1959	95.4198	25.6	53.9	5.35e-09	8	250	169	25600	262	251	fabI	6	241	CDN81550.1	5
1960	102.29	21.269	49.3	2.12e-07	9	268	181	21269	262	251	fabI	4	262	MTT20649.1	5
1961	102.29	21.269	49.3	2.12e-07	9	268	181	21269	262	251	fabI	4	262	OLR37716.1	5
1962	102.29	21.269	49.3	2.12e-07	9	268	181	21269	262	251	fabI	4	262	CDN80945.1	5
1963	51.145	24.627	41.6	7.38e-05	3	134	97	24627	262	254	fabI	123	246	MTT17639.1	115
1964	51.145	24.627	41.6	7.38e-05	3	134	97	24627	262	254	fabI	123	246	OLR36014.1	115
1965	51.145	24.627	41.6	7.38e-05	3	134	97	24627	262	254	fabI	123	246	CDN82817.1	115
1966	40.8397	32.71	41.2	9.48e-05	5	107	48	32710	262	251	fabI	160	258	MTT20648.1	161
1967	40.8397	32.71	41.2	9.48e-05	5	107	48	32710	262	251	fabI	160	258	OLR37717.1	161
1968	40.8397	32.71	41.2	9.48e-05	5	107	48	32710	262	251	fabI	160	258	CDN80944.1	161
1969	100	22.519	41.2	0.000104	11	262	174	22519	262	253	fabI	4	260	MTT19617.1	16
1970	100	22.519	41.2	0.000104	11	262	174	22519	262	253	fabI	4	260	OLR34616.1	16
1971	100	22.519	41.2	0.000111	11	262	174	22519	262	253	fabI	4	285	CDN83372.1	41
1972	100	21.756	39.3	0.000382	6	262	179	21756	262	255	fabI	4	248	MTT20672.1	3
1973	100	21.756	39.3	0.000382	6	262	179	21756	262	255	fabI	4	248	OLR37693.1	3
1974	100	21.756	39.3	0.000382	6	262	179	21756	262	255	fabI	4	248	CDN80969.1	3
1975	41.2214	27.778	37	0.002	2	108	74	27778	262	251	fabI	144	250	MTT20016.1	147
1976	41.2214	27.778	37	0.002	2	108	74	27778	262	251	fabI	144	250	OLR35057.1	147
1977	41.2214	27.778	37	0.002	2	108	74	27778	262	251	fabI	144	250	CDN83481.1	147
1978	12.9771	47.059	26.9	3.5	1	34	17	47059	262	198	fabI	165	179	MTT17748.1	147
1979	12.9771	47.059	26.9	3.5	1	34	17	47059	262	198	fabI	165	179	OLR36126.1	147
1980	12.9771	47.059	26.9	4	1	34	17	47059	262	198	fabI	165	186	CDN82929.1	154
1981	25.9542	25	26.6	4.5	0	68	51	25000	262	107	fabI	40	76	MTT22372.1	9
1982	25.9542	25	26.6	4.5	0	68	51	25000	262	107	fabI	40	76	CDN82580.1	9
1983	14.5038	28.947	27.3	4.5	0	38	27	28947	262	254	fabI	217	424	MTT18978.1	387
1984	14.5038	28.947	27.3	4.5	0	38	27	28947	262	254	fabI	217	424	OLR36590.1	387
1985	14.5038	28.947	27.3	4.5	0	38	27	28947	262	254	fabI	217	424	CDN85303.1	387
1989	87.4172	29.545	41.2	2.39e-05	7	132	73	29545	151	142	fabZ	24	195	CDN81420.1	71
1990	87.4172	29.545	40.4	2.98e-05	7	132	73	29545	151	142	fabZ	24	159	MTT18631.1	35
1991	87.4172	29.545	40.4	2.98e-05	7	132	73	29545	151	142	fabZ	24	159	OLR37376.1	35
1992	39.7351	31.667	27.7	1.2	2	60	33	31667	151	134	fabZ	75	169	MTT20296.1	118
1993	39.7351	31.667	27.7	1.2	2	60	33	31667	151	134	fabZ	75	169	OLR35663.1	118
1994	39.7351	31.667	27.7	1.2	2	60	33	31667	151	134	fabZ	75	169	CDN83796.1	118
1995	43.0464	30.769	26.9	1.5	2	65	42	30769	151	86	fabZ	25	90	MTT22124.1	26
1996	43.0464	30.769	26.9	1.5	2	65	42	30769	151	86	fabZ	25	90	CDN82565.1	26
1997	36.4238	29.091	26.6	3	0	55	39	29091	151	69	fabZ	15	269	MTT19557.1	215
1998	36.4238	29.091	26.6	3	0	55	39	29091	151	69	fabZ	15	269	OLR35374.1	215
1999	36.4238	29.091	26.6	3	0	55	39	29091	151	69	fabZ	15	269	CDN83085.1	215
2024	15.8774	35.088	29.6	1	2	57	33	35088	359	103	fbaA	47	415	MTT18361.1	363
2025	15.8774	35.088	29.6	1	2	57	33	35088	359	103	fbaA	47	415	OLR34527.1	363
2026	15.8774	35.088	29.6	1	2	57	33	35088	359	103	fbaA	47	415	CDN82178.1	363
2027	11.9777	34.884	29.3	1.4	0	43	28	34884	359	106	fbaA	64	310	MTT17988.1	268
2028	11.9777	34.884	29.3	1.4	0	43	28	34884	359	106	fbaA	64	310	OLR36427.1	268
2029	10.585	36.842	28.9	1.8	0	38	24	36842	359	101	fbaA	64	219	CDN84957.1	182
2030	14.2061	37.255	27.7	4.7	2	51	20	37255	359	144	fbaA	99	279	CDN84172.1	236
2031	14.2061	37.255	27.7	4.9	2	51	20	37255	359	144	fbaA	99	259	MTT19324.1	216
2032	14.2061	37.255	27.7	4.9	2	51	20	37255	359	144	fbaA	99	259	OLR33622.1	216
2033	28.1337	23.762	26.9	6.3	2	101	67	23762	359	161	fbaA	61	241	MTT18478.1	151
2034	28.1337	23.762	26.9	6.3	2	101	67	23762	359	161	fbaA	61	241	OLR34414.1	151
2035	28.1337	23.762	26.9	6.3	2	101	67	23762	359	161	fbaA	61	241	CDN82055.1	151
2036	15.5989	23.214	26.6	9.1	0	56	43	23214	359	309	fbaA	254	183	CDN80525.1	128
2037	15.5989	23.214	26.2	9.2	0	56	43	23214	359	309	fbaA	254	175	MTT21220.1	120
2038	15.5989	23.214	26.2	9.2	0	56	43	23214	359	309	fbaA	254	175	OLR36789.1	120
2042	22.5225	52	25.4	3.8	1	25	9	52000	111	93	fdx	69	839	MTT19453.1	818
2043	22.5225	52	25.4	3.8	1	25	9	52000	111	93	fdx	69	839	OLR35474.1	818
2044	22.5225	52	25.4	4	1	25	9	52000	111	93	fdx	69	870	CDN83192.1	849
2045	42.3423	31.915	25	4.5	1	47	27	31915	111	62	fdx	16	152	MTT21453.1	111
2046	42.3423	31.915	25	4.5	1	47	27	31915	111	62	fdx	16	152	OLR37571.1	111
2047	42.3423	31.915	25	4.5	1	47	27	31915	111	62	fdx	16	152	CDN81096.1	111
2048	27.9279	35.484	24.6	6.6	0	31	20	35484	111	42	fdx	12	421	MTT19885.1	391
2049	27.9279	35.484	24.6	6.6	0	31	20	35484	111	42	fdx	12	421	OLR35839.1	391
2050	27.9279	35.484	24.6	6.6	0	31	20	35484	111	42	fdx	12	421	CDN84407.1	391
2051	25.2252	35.714	24.6	7.5	0	28	18	35714	111	42	fdx	15	36	CDN82959.1	9
2052	25.2252	35.714	24.6	7.6	0	28	18	35714	111	42	fdx	15	34	MTT17778.1	7
2053	25.2252	35.714	24.6	7.6	0	28	18	35714	111	42	fdx	15	34	OLR36156.1	7
2060	15.2318	26.087	31.6	0.27	2	69	48	26087	453	159	ffh	91	94	MTT21251.1	29
2061	15.2318	26.087	31.6	0.27	2	69	48	26087	453	159	ffh	91	94	OLR34682.1	29
2062	15.2318	26.087	31.6	0.27	2	69	48	26087	453	159	ffh	91	94	CDN84016.1	29
2063	8.16777	45.946	31.6	0.32	1	37	17	45946	453	135	ffh	99	36	MTT18982.1	3
2064	8.16777	45.946	31.6	0.32	1	37	17	45946	453	135	ffh	99	36	OLR36586.1	3
2065	8.16777	45.946	31.6	0.33	1	37	17	45946	453	135	ffh	99	49	CDN85299.1	16
2066	16.9978	25.974	28.1	4.8	2	77	48	25974	453	92	ffh	25	142	MTT21866.1	66
2067	16.9978	25.974	28.1	4.8	2	77	48	25974	453	92	ffh	25	142	OLR30486.1	66
2068	16.9978	25.974	28.1	4.8	2	77	48	25974	453	92	ffh	25	142	CDN85226.1	66
2069	24.5033	27.027	28.1	5	5	111	51	27027	453	171	ffh	67	147	MTT20186.1	61
2070	24.5033	27.027	28.1	5	5	111	51	27027	453	171	ffh	67	147	OLR37532.1	61
2071	24.5033	27.027	28.1	5	5	111	51	27027	453	171	ffh	67	147	CDN81138.1	61
2072	31.1258	24.113	27.7	6.3	4	141	82	24113	453	206	ffh	66	246	OLR30311.1	131
2073	17.2185	29.487	26.9	6.5	2	78	42	29487	453	338	ffh	264	99	OLR37274.1	32
2074	17.2185	29.487	26.9	6.5	2	78	42	29487	453	338	ffh	264	99	CDN81718.1	32
2075	24.0618	22.936	27.3	9.7	2	109	77	22936	453	225	ffh	124	211	CDN84868.1	103
2076	11.0375	30	26.9	9.7	1	50	31	30000	453	139	ffh	90	47	MTT18572.1	2
2077	11.0375	30	26.9	9.7	1	50	31	30000	453	139	ffh	90	47	OLR36937.1	2
2078	11.0375	30	26.9	9.7	1	50	31	30000	453	139	ffh	90	47	CDN81360.1	2
2079	24.0618	22.936	27.3	9.8	2	109	77	22936	453	225	ffh	124	209	MTT17906.1	101
2080	24.0618	22.936	27.3	9.8	2	109	77	22936	453	225	ffh	124	209	OLR36510.1	101
2087	76.1364	28.358	27.3	2.1	5	134	73	28358	176	148	fldA	22	963	MTT19445.1	846
2088	76.1364	28.358	27.3	2.1	5	134	73	28358	176	148	fldA	22	963	OLR35482.1	846
2089	76.1364	28.358	27.3	2.2	5	134	73	28358	176	148	fldA	22	962	CDN83200.1	845
2090	15.9091	32.143	23.9	8	0	28	19	32143	176	49	fldA	22	52	MTT18662.1	25
2091	15.9091	32.143	23.9	8	0	28	19	32143	176	49	fldA	22	52	OLR37024.1	25
2092	15.9091	32.143	23.9	8	0	28	19	32143	176	49	fldA	22	52	CDN81451.1	25
2099	31.1111	28.571	45.8	3.64e-06	1	98	67	28571	315	164	fmt	70	161	MTT19499.1	64
2100	31.1111	28.571	45.8	3.64e-06	1	98	67	28571	315	164	fmt	70	161	OLR35430.1	64
2101	31.1111	28.571	45.8	3.64e-06	1	98	67	28571	315	164	fmt	70	161	CDN83143.1	64
2102	39.3651	29.839	39.3	0.000746	6	124	73	29839	315	163	fmt	52	245	MTT22147.1	124
2103	39.3651	29.839	39.3	0.000746	6	124	73	29839	315	163	fmt	52	245	OLR37324.1	124
2104	39.3651	29.839	39.3	0.000746	6	124	73	29839	315	163	fmt	52	245	CDN81776.1	124
2105	14.9206	31.915	26.6	9.2	1	47	29	31915	315	48	fmt	2	211	CDN83589.1	168
2106	14.9206	31.915	26.6	9.3	1	47	29	31915	315	48	fmt	2	210	MTT19908.1	167
2107	14.9206	31.915	26.6	9.3	1	47	29	31915	315	48	fmt	2	210	OLR35161.1	167
2115	23.8994	28.947	26.2	4.3	1	38	26	28947	159	75	folA	39	326	MTT18654.1	289
2116	23.8994	28.947	26.2	4.3	1	38	26	28947	159	75	folA	39	326	OLR37018.1	289
2117	23.8994	28.947	26.2	4.3	1	38	26	28947	159	75	folA	39	326	CDN81444.1	289
2124	42.623	21.154	26.6	1.6	0	52	41	21154	122	82	folB	31	136	MTT19393.1	85
2125	42.623	21.154	26.6	1.6	0	52	41	21154	122	82	folB	31	136	OLR32831.1	85
2126	42.623	21.154	26.2	1.8	0	52	41	21154	122	82	folB	31	147	CDN84247.1	96
2130	14.9289	38.095	31.6	0.2	2	63	34	38095	422	403	folC	345	153	MTT19693.1	92
2131	14.9289	38.095	31.6	0.2	2	63	34	38095	422	403	folC	345	153	OLR31840.1	92
2132	14.9289	38.095	31.6	0.2	2	63	34	38095	422	403	folC	345	153	CDN83293.1	92
2133	7.109	50	28.1	4.5	0	30	15	50000	422	79	folC	50	133	MTT18145.1	104
2134	7.109	50	28.1	4.5	0	30	15	50000	422	79	folC	50	133	OLR36276.1	104
2135	7.109	50	28.1	4.5	0	30	15	50000	422	79	folC	50	133	CDN85118.1	104
2136	14.455	36.066	27.7	4.6	2	61	37	36066	422	255	folC	196	152	MTT21636.1	93
2137	14.455	36.066	27.7	4.6	2	61	37	36066	422	255	folC	196	152	CDN80658.1	93
2138	14.455	36.066	27.7	4.8	2	61	37	36066	422	255	folC	196	104	OLR38069.1	45
2139	18.4834	33.333	27.3	7.9	3	78	48	33333	422	221	folC	146	274	MTT17872.1	199
2140	18.4834	33.333	27.3	7.9	3	78	48	33333	422	221	folC	146	274	OLR30467.1	199
2141	18.4834	33.333	27.3	7.9	3	78	48	33333	422	221	folC	146	274	CDN83056.1	199
2142	7.58294	40.625	26.9	8.4	1	32	18	40625	422	407	folC	377	211	MTT17873.1	180
2143	7.58294	40.625	26.9	8.4	1	32	18	40625	422	407	folC	377	211	OLR30468.1	180
2144	7.58294	40.625	26.9	8.4	1	32	18	40625	422	407	folC	377	211	CDN83057.1	180
2145	13.981	30.508	26.6	8.4	1	59	39	30508	422	248	folC	192	150	CDN83101.1	92
2146	13.981	30.508	26.6	9.3	1	59	39	30508	422	248	folC	192	148	MTT19542.1	90
2147	13.981	30.508	26.6	9.3	1	59	39	30508	422	248	folC	192	148	OLR35388.1	90
2151	17.0139	34.694	27.3	3.9	2	49	28	34694	288	76	folD	31	294	MTT17799.1	247
2152	17.0139	34.694	27.3	3.9	2	49	28	34694	288	76	folD	31	294	OLR36177.1	247
2153	17.0139	34.694	27.3	3.9	2	49	28	34694	288	76	folD	31	294	CDN82982.1	247
2157	19.3694	30.233	30.4	0.25	1	43	28	30233	222	124	folE	84	121	MTT17913.1	79
2158	19.3694	30.233	30.4	0.25	1	43	28	30233	222	124	folE	84	121	OLR36502.1	79
2159	19.3694	30.233	30.4	0.25	1	43	28	30233	222	124	folE	84	121	CDN84877.1	79
2160	58.1081	22.481	29.3	0.65	6	129	80	22481	222	151	folE	35	143	MTT21012.1	23
2161	58.1081	22.481	29.3	0.65	6	129	80	22481	222	151	folE	35	143	OLR34077.1	23
2162	57.6577	22.656	29.3	0.76	6	128	79	22656	222	151	folE	36	150	CDN84626.1	31
2163	16.2162	38.889	26.2	5.1	0	36	22	38889	222	160	folE	125	200	MTT18400.1	165
2164	16.2162	38.889	26.2	5.1	0	36	22	38889	222	160	folE	125	200	OLR34491.1	165
2165	16.2162	38.889	26.2	5.1	0	36	22	38889	222	160	folE	125	200	CDN82139.1	165
2173	36.1702	30.392	28.5	2.2	3	102	62	30392	282	184	folP	84	508	OLR35329.1	415
2174	36.1702	30.392	28.5	2.2	3	102	62	30392	282	184	folP	84	508	CDN82022.1	415
2175	23.0496	30.769	28.1	2.2	2	65	37	30769	282	76	folP	16	159	MTT18347.1	99
2176	23.0496	30.769	28.1	2.2	2	65	37	30769	282	76	folP	16	159	OLR34842.1	99
2177	23.0496	30.769	28.1	2.2	2	65	37	30769	282	76	folP	16	159	CDN82192.1	99
2178	36.1702	30.392	28.5	2.3	3	102	62	30392	282	184	folP	84	720	MTT21527.1	627
2179	33.3333	26.596	27.3	4.9	4	94	62	26596	282	190	folP	98	312	MTT19183.1	225
2180	33.3333	26.596	27.3	4.9	4	94	62	26596	282	190	folP	98	312	OLR37919.1	225
2181	33.3333	26.596	27.3	4.9	4	94	62	26596	282	190	folP	98	312	CDN80726.1	225
2182	35.1064	20.202	26.2	9.8	3	99	71	20202	282	230	folP	137	546	MTT18744.1	451
2183	35.1064	20.202	26.2	9.8	3	99	71	20202	282	230	folP	137	546	OLR37106.1	451
2184	35.1064	20.202	26.2	9.8	3	99	71	20202	282	230	folP	137	546	CDN81538.1	451
2188	40	27.027	26.2	5.1	1	74	53	27027	185	113	frr	40	178	MTT18361.1	106
2189	40	27.027	26.2	5.1	1	74	53	27027	185	113	frr	40	178	OLR34527.1	106
2190	40	27.027	26.2	5.1	1	74	53	27027	185	113	frr	40	178	CDN82178.1	106
2191	36.7568	32.353	25.8	8.4	3	68	38	32353	185	87	frr	27	239	CDN83649.1	173
2192	11.3514	57.143	25.4	9.9	1	21	8	57143	185	118	frr	98	323	MTT20616.1	304
2193	11.3514	57.143	25.4	9.9	1	21	8	57143	185	118	frr	98	323	OLR34398.1	304
2197	35.4762	26.846	33.5	0.086	6	149	95	26846	420	344	ftsA	205	303	MTT21278.1	160
2198	35.4762	26.846	33.5	0.086	6	149	95	26846	420	344	ftsA	205	303	OLR34710.1	160
2199	35.4762	26.846	33.1	0.1	6	149	95	26846	420	344	ftsA	205	328	CDN83986.1	185
2200	18.0952	26.316	32	0.22	2	76	49	26316	420	119	ftsA	44	246	MTT21326.1	178
2201	18.0952	26.316	32	0.22	2	76	49	26316	420	119	ftsA	44	246	OLR34755.1	178
2202	18.0952	26.316	32	0.22	2	76	49	26316	420	119	ftsA	44	246	CDN83938.1	178
2203	6.19048	46.154	26.9	1.6	0	26	14	46154	420	191	ftsA	166	53	MTT22332.1	28
2204	6.19048	46.154	26.9	1.6	0	26	14	46154	420	191	ftsA	166	53	OLR37366.1	28
2205	6.19048	46.154	26.9	1.6	0	26	14	46154	420	191	ftsA	166	53	CDN81823.1	28
2206	13.5714	29.825	29.3	1.7	1	57	39	29825	420	242	ftsA	186	184	OLR35392.1	129
2207	13.5714	29.825	29.3	1.7	1	57	39	29825	420	242	ftsA	186	184	MTT19538.1	129
2208	13.5714	29.825	29.3	1.7	1	57	39	29825	420	242	ftsA	186	184	CDN83105.1	129
2209	16.1905	29.412	29.3	1.9	1	68	47	29412	420	231	ftsA	165	257	CDN82746.1	190
2210	16.1905	29.412	28.9	2.2	1	68	47	29412	420	231	ftsA	165	236	MTT21404.1	169
2211	16.1905	29.412	28.9	2.2	1	68	47	29412	420	231	ftsA	165	236	OLR33588.1	169
2212	25	25.714	27.7	5.4	4	105	55	25714	420	190	ftsA	101	346	MTT19898.1	250
2213	25	25.714	27.7	5.4	4	105	55	25714	420	190	ftsA	101	346	OLR35826.1	250
2214	25	25.714	27.7	5.4	4	105	55	25714	420	190	ftsA	101	346	CDN84420.1	250
2215	46.6667	21.429	27.7	5.8	4	196	126	21429	420	352	ftsA	174	320	MTT20721.1	136
2216	46.6667	21.429	27.7	5.8	4	196	126	21429	420	352	ftsA	174	320	OLR37644.1	136
2217	46.6667	21.429	27.7	5.8	4	196	126	21429	420	352	ftsA	174	320	CDN81021.1	136
2221	33.0097	38.235	25.4	3	0	34	21	38235	103	80	ftsB	47	312	MTT18907.1	279
2222	33.0097	38.235	25.4	3	0	34	21	38235	103	80	ftsB	47	312	OLR36659.1	279
2223	33.0097	38.235	25.4	3	0	34	21	38235	103	80	ftsB	47	312	CDN80393.1	279
2224	40.7767	33.333	25	5	1	42	27	33333	103	65	ftsB	24	698	MTT21412.1	658
2225	40.7767	33.333	25	5	1	42	27	33333	103	65	ftsB	24	698	OLR33594.1	658
2226	40.7767	33.333	25	5	1	42	27	33333	103	65	ftsB	24	698	CDN82753.1	658
2227	44.6602	32.609	24.6	6.2	1	46	29	32609	103	101	ftsB	56	138	CDN81983.1	95
2228	16.5049	52.941	24.3	6.9	0	17	8	52941	103	17	ftsB	1	39	MTT18184.1	23
2229	16.5049	52.941	24.3	6.9	0	17	8	52941	103	17	ftsB	1	39	OLR35009.1	23
2230	16.5049	52.941	24.3	6.9	0	17	8	52941	103	17	ftsB	1	39	CDN82360.1	23
2231	48.5437	32	24.3	8.5	0	50	34	32000	103	51	ftsB	2	92	OLR35567.1	43
2235	14.9068	35.417	47.8	5.98e-06	4	96	52	35417	644	242	ftsH	154	109	MTT20557.1	17
2236	14.9068	35.417	47.8	5.98e-06	4	96	52	35417	644	242	ftsH	154	109	OLR34319.1	17
2237	14.9068	35.417	47.8	5.98e-06	4	96	52	35417	644	242	ftsH	154	109	CDN84775.1	17
2238	12.1118	34.615	46.2	1.47e-05	2	78	45	34615	644	259	ftsH	188	192	MTT19088.1	115
2239	12.1118	34.615	46.2	1.47e-05	2	78	45	34615	644	259	ftsH	188	192	OLR37827.1	115
2240	12.1118	34.615	46.2	1.47e-05	2	78	45	34615	644	259	ftsH	188	192	CDN80828.1	115
2241	10.8696	34.286	38.1	0.006	2	70	35	34286	644	253	ftsH	188	115	MTT20068.1	53
2242	10.8696	34.286	38.1	0.006	2	70	35	34286	644	253	ftsH	188	115	OLR37417.1	53
2243	10.8696	34.286	38.1	0.006	2	70	35	34286	644	253	ftsH	188	115	CDN81258.1	53
2244	9.47205	37.705	38.1	0.007	2	61	27	37705	644	227	ftsH	167	383	MTT19087.1	334
2245	9.47205	37.705	38.1	0.007	2	61	27	37705	644	227	ftsH	167	383	OLR37826.1	334
2246	9.47205	37.705	38.1	0.007	2	61	27	37705	644	227	ftsH	167	398	CDN80829.1	349
2247	6.21118	47.5	35	0.048	0	40	21	47500	644	218	ftsH	179	88	MTT20357.1	49
2248	6.21118	47.5	35	0.048	0	40	21	47500	644	218	ftsH	179	88	OLR30136.1	49
2249	6.21118	47.5	35	0.048	0	40	21	47500	644	218	ftsH	179	88	CDN82367.1	49
2250	41.6149	24.254	34.7	0.066	13	268	142	24254	644	365	ftsH	141	497	MTT20008.1	248
2251	41.6149	24.254	34.7	0.066	13	268	142	24254	644	365	ftsH	141	497	OLR35065.1	248
2252	41.6149	24.254	34.7	0.066	13	268	142	24254	644	365	ftsH	141	497	CDN83489.1	248
2253	3.10559	65	32.7	0.24	0	20	7	65000	644	207	ftsH	188	232	MTT21048.1	213
2254	3.10559	65	32.7	0.24	0	20	7	65000	644	207	ftsH	188	232	OLR34041.1	213
2255	3.10559	65	32.7	0.25	0	20	7	65000	644	207	ftsH	188	242	CDN84591.1	223
2256	5.59006	44.444	32.3	0.31	1	36	14	44444	644	215	ftsH	186	134	MTT22087.1	99
2257	14.1304	29.67	32	0.57	4	91	49	29670	644	267	ftsH	189	303	CDN81249.1	216
2258	14.1304	29.67	32	0.58	4	91	49	29670	644	267	ftsH	189	298	MTT20077.1	211
2259	14.1304	29.67	32	0.58	4	91	49	29670	644	267	ftsH	189	298	OLR37425.1	211
2260	11.3354	30.137	30.4	0.89	3	73	44	30137	644	253	ftsH	186	174	CDN82649.1	104
2261	26.2422	27.219	30.8	0.94	7	169	77	27219	644	323	ftsH	186	252	CDN82796.1	99
2262	26.2422	27.219	30.4	1.2	7	169	77	27219	644	323	ftsH	186	230	MTT17620.1	77
2263	26.2422	27.219	30.4	1.2	7	169	77	27219	644	323	ftsH	186	230	OLR35995.1	77
2264	11.0248	30.986	29.6	1.5	3	71	42	30986	644	253	ftsH	188	115	MTT22302.1	47
2265	9.47205	27.869	30	1.5	2	61	34	27869	644	94	ftsH	34	53	MTT17733.1	3
2266	9.47205	27.869	30	1.5	2	61	34	27869	644	94	ftsH	34	53	OLR36112.1	3
2267	9.47205	27.869	30	1.5	2	61	34	27869	644	94	ftsH	34	53	CDN82913.1	3
2268	14.7516	30.526	30.4	1.8	6	95	49	30526	644	269	ftsH	189	331	MTT22174.1	240
2269	14.7516	30.526	30.4	1.8	6	95	49	30526	644	269	ftsH	189	331	OLR34666.1	240
2270	14.7516	30.526	30.4	1.8	6	95	49	30526	644	269	ftsH	189	331	CDN83425.1	240
2271	9.93789	29.688	30	2.1	2	64	40	29688	644	241	ftsH	180	402	MTT18944.1	342
2272	9.93789	29.688	30	2.1	2	64	40	29688	644	241	ftsH	180	402	OLR36624.1	342
2273	9.93789	29.688	30	2.1	2	64	40	29688	644	241	ftsH	180	402	CDN85338.1	342
2274	2.48447	62.5	28.9	4.3	0	16	6	62500	644	200	ftsH	185	253	MTT21866.1	238
2275	2.48447	62.5	28.9	4.3	0	16	6	62500	644	200	ftsH	185	253	OLR30486.1	238
2276	2.48447	62.5	28.9	4.3	0	16	6	62500	644	200	ftsH	185	253	CDN85226.1	238
2277	4.03727	53.846	28.5	5.1	1	26	10	53846	644	207	ftsH	184	50	MTT19556.1	25
2278	4.03727	53.846	28.5	5.1	1	26	10	53846	644	207	ftsH	184	50	OLR35375.1	25
2279	4.03727	53.846	28.5	5.1	1	26	10	53846	644	207	ftsH	184	50	CDN83086.1	25
2280	6.0559	43.59	28.5	5.3	1	39	19	43590	644	199	ftsH	161	308	MTT19353.1	273
2281	6.0559	43.59	28.5	5.3	1	39	19	43590	644	199	ftsH	161	308	OLR32871.1	273
2282	6.0559	43.59	28.5	5.3	1	39	19	43590	644	199	ftsH	161	308	CDN84203.1	273
2283	12.2671	29.114	28.5	5.3	3	79	43	29114	644	254	ftsH	189	680	MTT19752.1	602
2284	16.3043	26.667	28.1	8.1	5	105	59	26667	644	267	ftsH	177	291	MTT19752.1	191
2285	12.2671	29.114	28.5	5.3	3	79	43	29114	644	254	ftsH	189	680	OLR31784.1	602
2286	16.3043	26.667	28.1	8.1	5	105	59	26667	644	267	ftsH	177	291	OLR31784.1	191
2287	12.2671	29.114	28.5	5.4	3	79	43	29114	644	254	ftsH	189	684	CDN83232.1	606
2288	16.3043	26.667	28.1	8.3	5	105	59	26667	644	267	ftsH	177	295	CDN83232.1	195
2289	12.4224	28.75	27.7	7.5	3	80	49	28750	644	439	ftsH	361	214	MTT19731.1	142
2290	12.4224	28.75	27.7	7.5	3	80	49	28750	644	439	ftsH	361	214	OLR31802.1	142
2291	12.4224	28.75	27.7	7.5	3	80	49	28750	644	439	ftsH	361	214	CDN83253.1	142
2292	3.72671	45.833	27.7	8	0	24	13	45833	644	211	ftsH	188	69	CDN84185.1	46
2293	3.72671	45.833	27.7	8.1	0	24	13	45833	644	211	ftsH	188	56	MTT19337.1	33
2294	3.72671	45.833	27.7	8.1	0	24	13	45833	644	211	ftsH	188	56	OLR32886.1	33
2295	4.50311	27.586	27.3	8.8	0	29	21	27586	644	214	ftsH	186	100	CDN84126.1	72
2296	4.50311	27.586	26.9	9.4	0	29	21	27586	644	214	ftsH	186	33	MTT19280.1	5
2297	4.50311	27.586	26.9	9.4	0	29	21	27586	644	214	ftsH	186	33	OLR33714.1	5
2298	3.26087	57.143	27.7	9.8	0	21	9	57143	644	210	ftsH	190	58	MTT20891.1	38
2299	3.26087	57.143	27.7	9.8	0	21	9	57143	644	210	ftsH	190	58	OLR35220.1	38
2300	3.26087	57.143	27.7	9.8	0	21	9	57143	644	210	ftsH	190	58	CDN81910.1	38
2307	43.5374	26.563	43.9	0.00011	9	256	138	26563	588	497	ftsI	263	701	MTT21212.1	475
2308	43.5374	26.563	43.9	0.00011	9	256	138	26563	588	497	ftsI	263	701	OLR36796.1	475
2309	43.5374	26.563	43.9	0.00011	9	256	138	26563	588	497	ftsI	263	701	CDN80533.1	475
2310	37.585	22.172	32.3	0.34	10	221	131	22172	588	450	ftsI	241	596	MTT19286.1	406
2311	37.585	22.172	32.3	0.34	10	221	131	22172	588	450	ftsI	241	596	OLR33660.1	406
2312	37.585	22.172	32.3	0.36	10	221	131	22172	588	450	ftsI	241	604	CDN84132.1	414
2313	16.8367	25.253	32	0.4	4	99	60	25253	588	393	ftsI	299	422	MTT19477.1	334
2314	16.8367	25.253	32	0.4	4	99	60	25253	588	393	ftsI	299	422	OLR35451.1	334
2315	16.8367	25.253	32	0.41	4	99	60	25253	588	393	ftsI	299	410	CDN83166.1	322
2316	19.898	26.496	29.6	2.3	3	117	62	26496	588	511	ftsI	402	148	MTT19939.1	49
2317	19.898	26.496	29.6	2.3	3	117	62	26496	588	511	ftsI	402	148	OLR35129.1	49
2318	19.898	26.496	29.6	2.6	3	117	62	26496	588	511	ftsI	402	158	CDN83558.1	59
2319	24.1497	21.831	28.9	3.9	5	142	68	21831	588	456	ftsI	337	255	CDN82080.1	135
2320	24.1497	21.831	28.5	4.3	5	142	68	21831	588	456	ftsI	337	244	MTT18454.1	124
2321	24.1497	21.831	28.5	4.3	5	142	68	21831	588	456	ftsI	337	244	OLR34438.1	124
2322	17.517	25.243	28.5	5.1	2	103	69	25243	588	388	ftsI	286	643	CDN85401.1	549
2323	11.5646	25	28.1	6.3	2	68	43	25000	588	556	ftsI	497	271	MTT20117.1	204
2324	11.5646	25	28.1	6.3	2	68	43	25000	588	556	ftsI	497	271	OLR37464.1	204
2325	11.5646	25	28.1	6.5	2	68	43	25000	588	556	ftsI	497	281	CDN81208.1	214
2326	11.5646	29.412	27.7	8	1	68	43	29412	588	315	ftsI	253	204	MTT21260.1	137
2327	11.5646	29.412	27.7	8	1	68	43	29412	588	315	ftsI	253	204	OLR34692.1	137
2328	11.5646	29.412	27.3	9	1	68	43	29412	588	315	ftsI	253	206	CDN84007.1	139
2332	45.4545	29.091	25.4	3.1	1	55	36	29091	121	97	ftsL	43	125	OLR30293.1	74
2333	28.9256	34.286	25.8	3.4	0	35	23	34286	121	116	ftsL	82	430	MTT19627.1	396
2334	28.9256	34.286	25.8	3.4	0	35	23	34286	121	116	ftsL	82	430	OLR34606.1	396
2335	28.9256	34.286	25.8	3.4	0	35	23	34286	121	116	ftsL	82	430	CDN83362.1	396
2336	16.5289	45	24.3	8.9	0	20	11	45000	121	58	ftsL	39	22	MTT20568.1	3
2337	16.5289	45	24.3	8.9	0	20	11	45000	121	58	ftsL	39	22	OLR34330.1	3
2338	16.5289	45	24.3	8.9	0	20	11	45000	121	58	ftsL	39	22	CDN84764.1	3
2342	35.1449	25.773	28.5	1.6	2	97	65	25773	276	187	ftsQ	92	333	MTT20615.1	243
2343	35.1449	25.773	28.5	1.6	2	97	65	25773	276	187	ftsQ	92	333	OLR34379.1	243
2344	35.1449	25.773	28.5	1.6	2	97	65	25773	276	187	ftsQ	92	333	CDN84707.1	243
2345	18.4783	31.373	27.3	3.5	1	51	30	31373	276	226	ftsQ	176	187	MTT18678.1	142
2346	18.4783	31.373	27.3	3.5	1	51	30	31373	276	226	ftsQ	176	187	OLR37041.1	142
2347	18.4783	31.373	27.3	3.5	1	51	30	31373	276	226	ftsQ	176	187	CDN81467.1	142
2348	28.9855	26.25	26.2	8.7	3	80	51	26250	276	103	ftsQ	30	91	MTT18014.1	14
2349	28.9855	26.25	26.2	8.7	3	80	51	26250	276	103	ftsQ	30	91	OLR36536.1	14
2350	28.9855	26.25	26.2	8.9	3	80	51	26250	276	103	ftsQ	30	94	CDN84982.1	17
2351	22.1014	27.869	26.2	9.2	1	61	40	27869	276	248	ftsQ	188	360	MTT19994.1	304
2352	22.1014	27.869	26.2	9.2	1	61	40	27869	276	248	ftsQ	188	360	OLR35079.1	304
2353	22.1014	27.869	26.2	9.5	1	61	40	27869	276	248	ftsQ	188	401	CDN83503.1	345
2360	9.17874	31.579	28.9	3.2	0	38	26	31579	414	283	ftsW	246	377	CDN83200.1	340
2361	9.17874	31.579	28.9	3.2	0	38	26	31579	414	283	ftsW	246	378	MTT19445.1	341
2362	9.17874	31.579	28.9	3.2	0	38	26	31579	414	283	ftsW	246	378	OLR35482.1	341
2363	7.48792	45.161	26.2	3.7	1	31	14	45161	414	279	ftsW	249	29	MTT20661.1	2
2364	7.48792	45.161	26.2	3.7	1	31	14	45161	414	279	ftsW	249	29	OLR37704.1	2
2365	7.48792	45.161	26.2	3.9	1	31	14	45161	414	279	ftsW	249	31	CDN80958.1	4
2366	8.9372	40.541	26.2	6.7	1	37	20	40541	414	277	ftsW	241	67	MTT19262.1	33
2367	8.9372	40.541	26.2	6.7	1	37	20	40541	414	277	ftsW	241	67	OLR33683.1	33
2368	8.9372	40.541	26.2	6.7	1	37	20	40541	414	277	ftsW	241	67	CDN84108.1	33
2369	15.942	30.303	26.9	6.8	3	66	28	30303	414	108	ftsW	46	61	MTT20514.1	11
2370	15.942	30.303	26.9	6.8	3	66	28	30303	414	108	ftsW	46	61	OLR34275.1	11
2371	24.1546	27	26.2	7.6	1	100	71	27000	414	219	ftsW	122	110	MTT20521.1	11
2372	24.1546	27	26.2	7.6	1	100	71	27000	414	219	ftsW	122	110	OLR34284.1	11
2373	24.1546	27	26.2	7.6	1	100	71	27000	414	219	ftsW	122	110	CDN84811.1	11
2374	15.942	30.303	26.9	8.8	3	66	28	30303	414	108	ftsW	46	98	CDN82527.1	48
2381	10.4628	30.769	32	0.2	0	52	36	30769	497	340	ftsY	289	75	MTT19633.1	24
2382	10.4628	30.769	32	0.2	0	52	36	30769	497	340	ftsY	289	75	OLR34600.1	24
2383	10.4628	30.769	32	0.2	0	52	36	30769	497	340	ftsY	289	75	CDN83355.1	24
2384	6.03622	40	32.3	0.21	0	30	18	40000	497	326	ftsY	297	68	MTT20277.1	39
2385	6.03622	40	32.3	0.21	0	30	18	40000	497	326	ftsY	297	68	OLR35643.1	39
2386	6.03622	40	32.3	0.21	0	30	18	40000	497	326	ftsY	297	68	CDN83777.1	39
2387	9.45674	38.298	32.3	0.29	1	47	28	38298	497	330	ftsY	284	138	MTT20621.1	93
2388	9.45674	38.298	32.3	0.29	1	47	28	38298	497	330	ftsY	284	138	OLR34383.1	93
2389	9.45674	38.298	32.3	0.29	1	47	28	38298	497	330	ftsY	284	138	CDN84700.1	93
2390	11.2676	39.286	28.5	3.9	1	56	33	39286	497	101	ftsY	47	80	CDN83700.1	25
2391	7.64588	34.211	28.1	4.1	0	38	25	34211	497	322	ftsY	285	55	MTT18328.1	18
2392	7.64588	34.211	28.1	4.1	0	38	25	34211	497	322	ftsY	285	55	OLR34862.1	18
2393	7.64588	34.211	28.1	4.1	0	38	25	34211	497	322	ftsY	285	55	CDN82213.1	18
2394	7.84708	43.59	28.5	4.9	1	39	19	43590	497	307	ftsY	272	199	MTT21342.1	161
2395	7.84708	43.59	28.5	4.9	1	39	19	43590	497	307	ftsY	272	199	OLR34769.1	161
2396	7.84708	43.59	28.5	4.9	1	39	19	43590	497	307	ftsY	272	199	CDN83922.1	161
2397	4.02414	45	27.7	5.4	0	20	11	45000	497	314	ftsY	295	48	OLR32900.1	29
2398	4.02414	45	27.7	5.5	0	20	11	45000	497	314	ftsY	295	56	CDN84190.1	37
2399	4.02414	45	27.7	5.7	0	20	11	45000	497	314	ftsY	295	52	MTT19341.1	33
2400	9.45674	29.787	27.7	6.9	1	47	31	29787	497	341	ftsY	295	395	MTT18944.1	351
2401	9.45674	29.787	27.7	6.9	1	47	31	29787	497	341	ftsY	295	395	OLR36624.1	351
2402	9.45674	29.787	27.7	6.9	1	47	31	29787	497	341	ftsY	295	395	CDN85338.1	351
2403	6.43863	31.25	26.9	9.1	0	32	22	31250	497	326	ftsY	295	64	MTT19342.1	33
2404	6.43863	31.25	26.9	9.1	0	32	22	31250	497	326	ftsY	295	64	OLR32881.1	33
2405	6.43863	31.25	26.9	9.1	0	32	22	31250	497	326	ftsY	295	64	CDN84191.1	33
2417	15.9091	27.679	37.7	0.008	5	112	68	27679	704	696	fusA	592	482	MTT20613.1	377
2420	15.9091	27.679	37.7	0.008	5	112	68	27679	704	696	fusA	592	482	OLR34377.1	377
2423	15.9091	27.679	37.7	0.008	5	112	68	27679	704	696	fusA	592	482	CDN84709.1	377
2425	28.267	24.623	46.6	1.73e-05	8	199	133	24623	704	502	fusA	317	385	MTT19432.1	191
2426	10.9375	25.974	33.9	0.13	1	77	56	25974	704	687	fusA	612	475	MTT19432.1	399
2428	28.267	24.623	46.6	1.73e-05	8	199	133	24623	704	502	fusA	317	385	OLR35495.1	191
2429	10.9375	25.974	33.9	0.13	1	77	56	25974	704	687	fusA	612	475	OLR35495.1	399
2431	28.267	24.623	46.6	1.73e-05	8	199	133	24623	704	502	fusA	317	385	CDN83212.1	191
2432	10.9375	25.974	33.9	0.13	1	77	56	25974	704	687	fusA	612	475	CDN83212.1	399
2433	21.0227	29.054	54.7	3.88e-08	6	148	84	29054	704	145	fusA	3	139	CDN84080.1	8
2434	21.0227	29.054	54.7	4.05e-08	6	148	84	29054	704	145	fusA	3	139	CDN84818.1	8
2435	13.7784	29.897	43.1	0.000133	3	97	60	29897	704	145	fusA	50	90	OLR27845.1	1
2436	13.7784	28.866	41.6	0.000471	3	97	61	28866	704	145	fusA	50	94	MTT22439.1	5
2437	10.6534	36	37.7	0.01	0	75	48	36000	704	158	fusA	84	514	MTT21744.1	440
2438	10.6534	36	37.7	0.01	0	75	48	36000	704	158	fusA	84	514	OLR34777.1	440
2439	10.6534	36	37.7	0.01	0	75	48	36000	704	158	fusA	84	514	CDN83914.1	440
2440	15.767	29.73	37.4	0.012	4	111	57	29730	704	123	fusA	13	92	MTT19828.1	3
2441	15.767	29.73	37.4	0.012	4	111	57	29730	704	123	fusA	13	92	OLR35896.1	3
2442	15.767	29.73	37.4	0.012	4	111	57	29730	704	123	fusA	13	92	CDN84348.1	3
2443	19.8864	26.429	36.6	0.021	4	140	85	26429	704	169	fusA	41	205	MTT19632.1	73
2444	19.8864	26.429	36.6	0.021	4	140	85	26429	704	169	fusA	41	205	OLR34601.1	73
2445	19.8864	26.429	36.6	0.021	4	140	85	26429	704	169	fusA	41	205	CDN83356.1	73
2446	13.6364	30.208	33.1	0.029	5	96	47	30208	704	94	fusA	3	87	OLR28404.1	8
2447	9.65909	33.824	30.4	0.22	3	68	32	33824	704	66	fusA	3	66	MTT22324.1	8
2448	9.65909	33.824	30.4	0.22	3	68	32	33824	704	66	fusA	3	66	MTT19234.1	8
2449	15.0568	23.585	28.1	8.9	3	106	69	23585	704	191	fusA	94	367	MTT22129.1	266
2450	15.0568	23.585	28.1	8.9	3	106	69	23585	704	191	fusA	94	367	CDN82560.1	266
2460	18.7311	30.645	28.9	1.7	2	62	36	30645	331	176	gapA	115	390	MTT17709.1	336
2461	18.7311	30.645	28.9	1.7	2	62	36	30645	331	176	gapA	115	390	OLR36087.1	336
2462	18.7311	30.645	28.9	1.7	2	62	36	30645	331	176	gapA	115	390	CDN82888.1	336
2463	9.66767	28.125	26.9	6.3	0	32	23	28125	331	321	gapA	290	288	MTT19545.1	257
2464	9.66767	28.125	26.9	6.3	0	32	23	28125	331	321	gapA	290	288	OLR35386.1	257
2465	9.66767	28.125	26.9	6.3	0	32	23	28125	331	321	gapA	290	288	CDN83098.1	257
2466	8.45921	35.714	26.9	7.1	0	28	18	35714	331	329	gapA	302	364	OLR31229.1	337
2473	30.1124	31.343	45.4	1.86e-05	5	134	81	31343	445	130	glmM	7	174	MTT21490.1	42
2474	30.1124	31.343	45.4	1.86e-05	5	134	81	31343	445	130	glmM	7	174	OLR37606.1	42
2475	30.1124	31.343	45.4	1.95e-05	5	134	81	31343	445	130	glmM	7	191	CDN81059.1	59
2476	53.0337	25	28.5	3.5	9	236	139	25000	445	243	glmM	30	236	MTT19845.1	17
2477	53.0337	25	28.5	3.5	9	236	139	25000	445	243	glmM	30	236	OLR35879.1	17
2478	53.0337	25	28.5	3.5	9	236	139	25000	445	243	glmM	30	236	CDN84366.1	17
2479	6.74157	40	26.9	8.3	0	30	18	40000	445	409	glmM	380	147	CDN84859.1	118
2480	6.74157	40	26.9	8.4	0	30	18	40000	445	409	glmM	380	137	MTT17897.1	108
2481	6.74157	40	26.9	8.4	0	30	18	40000	445	409	glmM	380	137	OLR36519.1	108
2488	60.5911	22.493	42.7	0.000154	15	369	246	22493	609	599	glmS	252	364	MTT21715.1	15
2489	60.5911	22.493	42.7	0.000154	15	369	246	22493	609	599	glmS	252	364	OLR34806.1	15
2490	60.5911	22.493	42.7	0.000154	15	369	246	22493	609	599	glmS	252	364	CDN83886.1	15
2491	27.0936	27.273	42.4	0.000281	8	165	90	27273	609	240	glmS	93	221	MTT21514.1	70
2492	27.0936	27.273	42.4	0.000281	8	165	90	27273	609	240	glmS	93	221	OLR37630.1	70
2493	27.0936	27.273	42.4	0.000294	8	165	90	27273	609	240	glmS	93	225	CDN81035.1	74
2494	13.1363	32.5	35.8	0.023	2	80	51	32500	609	420	glmS	343	212	MTT19551.1	134
2495	13.1363	32.5	35.8	0.023	2	80	51	32500	609	420	glmS	343	212	OLR35380.1	134
2496	13.1363	32.5	35.8	0.023	2	80	51	32500	609	420	glmS	343	212	CDN83091.1	134
2497	22.1675	23.704	34.7	0.044	4	135	90	23704	609	126	glmS	1	136	CDN80607.1	6
2498	22.1675	23.704	34.7	0.045	4	135	90	23704	609	126	glmS	1	131	MTT21588.1	1
2499	22.1675	23.704	34.7	0.045	4	135	90	23704	609	126	glmS	1	131	OLR38031.1	1
2500	14.9425	32.967	30	1.1	3	91	55	32967	609	424	glmS	338	176	MTT20045.1	88
2501	14.9425	32.967	30	1.1	3	91	55	32967	609	424	glmS	338	176	OLR35028.1	88
2502	14.9425	32.967	30	1.1	3	91	55	32967	609	424	glmS	338	176	CDN83451.1	88
2503	9.1954	33.929	30	1.6	2	56	34	33929	609	395	glmS	341	390	MTT19607.1	337
2504	9.1954	33.929	30	1.6	2	56	34	33929	609	395	glmS	341	390	OLR34627.1	337
2505	9.1954	33.929	30	1.6	2	56	34	33929	609	395	glmS	341	390	CDN83383.1	337
2506	11.1658	30.882	28.1	6.8	2	68	44	30882	609	435	glmS	371	419	MTT18914.1	352
2507	11.1658	30.882	28.1	6.8	2	68	44	30882	609	435	glmS	371	419	OLR36653.1	352
2508	11.1658	30.882	28.1	6.8	2	68	44	30882	609	435	glmS	371	419	CDN80387.1	352
2512	26.5351	26.446	43.9	1.89e-05	2	121	70	26446	456	387	glmU	270	116	MTT21657.1	12
2513	15.3509	27.143	27.7	5	0	70	51	27143	456	331	glmU	262	112	MTT21657.1	43
2514	34.8684	29.56	43.9	4.59e-05	6	159	90	29560	456	424	glmU	269	252	MTT21179.1	113
2515	34.8684	29.56	43.9	4.59e-05	6	159	90	29560	456	424	glmU	269	252	OLR36828.1	113
2516	34.8684	29.56	43.9	4.59e-05	6	159	90	29560	456	424	glmU	269	252	CDN80566.1	113
2517	23.2456	25.472	39.7	0.000395	1	106	63	25472	456	387	glmU	282	97	CDN82631.1	8
2518	15.3509	27.143	26.9	7.5	0	70	51	27143	456	331	glmU	262	93	CDN82631.1	24
2519	14.9123	27.941	37.7	0.001	0	68	49	27941	456	387	glmU	320	69	OLR32810.1	2
2520	13.8158	28.571	27.3	4.4	0	63	45	28571	456	331	glmU	269	65	OLR32810.1	3
2521	47.807	24.312	35.4	0.021	7	218	147	24312	456	215	glmU	9	217	MTT21374.1	7
2522	47.807	24.312	35.4	0.021	7	218	147	24312	456	215	glmU	9	217	OLR33558.1	7
2523	47.807	24.312	35.4	0.021	7	218	147	24312	456	215	glmU	9	217	CDN82715.1	7
2524	23.6842	30.556	33.9	0.03	4	108	46	30556	456	384	glmU	280	141	MTT21393.1	60
2525	7.45614	47.059	33.5	0.051	0	34	18	47059	456	302	glmU	269	145	MTT21393.1	112
2526	14.4737	30.303	32.7	0.085	0	66	46	30303	456	438	glmU	373	152	MTT21393.1	87
2527	23.6842	30.556	33.9	0.03	4	108	46	30556	456	384	glmU	280	141	OLR33577.1	60
2528	7.45614	47.059	33.5	0.051	0	34	18	47059	456	302	glmU	269	145	OLR33577.1	112
2529	14.4737	30.303	32.7	0.085	0	66	46	30303	456	438	glmU	373	152	OLR33577.1	87
2530	23.6842	30.556	33.9	0.03	4	108	46	30556	456	384	glmU	280	141	CDN82735.1	60
2531	7.45614	47.059	33.5	0.051	0	34	18	47059	456	302	glmU	269	145	CDN82735.1	112
2532	14.4737	30.303	32.7	0.085	0	66	46	30303	456	438	glmU	373	152	CDN82735.1	87
2533	10.0877	30.435	33.9	0.039	0	46	32	30435	456	437	glmU	392	174	MTT19172.1	129
2534	10.0877	30.435	33.9	0.039	0	46	32	30435	456	437	glmU	392	174	OLR38065.1	129
2535	9.86842	31.111	34.3	0.04	0	45	31	31111	456	437	glmU	393	191	CDN80737.1	147
2536	26.0965	24.37	34.7	0.043	2	119	83	24370	456	120	glmU	9	152	CDN83685.1	34
2537	29.1667	26.316	33.9	0.048	4	133	88	26316	456	133	glmU	5	128	MTT18602.1	2
2538	29.1667	26.316	33.9	0.048	4	133	88	26316	456	133	glmU	5	128	OLR36968.1	2
2539	29.1667	26.316	33.9	0.048	4	133	88	26316	456	133	glmU	5	128	CDN81391.1	2
2540	16.0088	31.507	31.2	0.54	1	73	44	31507	456	430	glmU	358	184	MTT21331.1	118
2541	16.0088	31.507	31.2	0.54	1	73	44	31507	456	430	glmU	358	184	OLR34758.1	118
2542	16.0088	31.507	31.2	0.54	1	73	44	31507	456	430	glmU	358	184	CDN83933.1	118
2543	26.7544	27.869	30	0.76	6	122	76	27869	456	405	glmU	286	126	MTT21796.1	15
2544	22.1491	25.743	29.3	1.2	5	101	67	25743	456	359	glmU	266	180	MTT21796.1	81
2545	26.7544	27.869	30	0.76	6	122	76	27869	456	405	glmU	286	126	OLR31401.1	15
2546	22.1491	25.743	29.3	1.2	5	101	67	25743	456	359	glmU	266	180	OLR31401.1	81
2547	8.77193	32.5	30	0.79	0	40	27	32500	456	436	glmU	397	171	MTT19068.1	132
2548	8.77193	32.5	30	0.79	0	40	27	32500	456	436	glmU	397	171	OLR37808.1	132
2549	8.77193	32.5	30	0.79	0	40	27	32500	456	436	glmU	397	171	CDN80849.1	132
2550	24.3421	28.829	29.6	0.86	3	111	65	28829	456	427	glmU	331	151	MTT21389.1	41
2551	24.3421	28.829	29.6	0.86	3	111	65	28829	456	427	glmU	331	151	CDN82731.1	41
2552	24.3421	28.829	29.6	0.92	3	111	65	28829	456	427	glmU	331	151	OLR33573.1	41
2553	44.0789	21.891	30.4	0.93	4	201	141	21891	456	331	glmU	144	363	MTT22226.1	166
2554	44.0789	21.891	30.4	0.93	4	201	141	21891	456	331	glmU	144	363	OLR29022.1	166
2555	44.0789	21.891	30.4	0.93	4	201	141	21891	456	331	glmU	144	363	CDN85443.1	166
2556	52.4123	24.268	29.6	1.3	9	239	131	24268	456	202	glmU	9	245	MTT22143.1	12
2557	52.4123	24.268	29.6	1.3	9	239	131	24268	456	202	glmU	9	245	OLR37328.1	12
2558	52.4123	24.268	29.6	1.3	9	239	131	24268	456	202	glmU	9	245	CDN81780.1	12
2559	26.9737	28.455	28.5	3.3	7	123	74	28455	456	405	glmU	286	198	CDN84017.1	87
2560	8.99123	39.024	28.1	4.2	1	41	24	39024	456	306	glmU	266	192	CDN84017.1	153
2561	25.2193	24.348	27.3	5.7	3	115	70	24348	456	427	glmU	313	121	MTT18896.1	24
2562	25.2193	24.348	27.3	5.7	3	115	70	24348	456	427	glmU	313	121	OLR36673.1	24
2563	25	24.561	26.9	7.1	3	114	69	24561	456	427	glmU	314	128	CDN80405.1	32
2564	20.614	24.468	27.3	7.7	2	94	56	24468	456	218	glmU	140	400	MTT22023.1	307
2565	20.614	24.468	27.3	7.7	2	94	56	24468	456	218	glmU	140	400	OLR37193.1	307
2566	20.614	24.468	27.3	7.7	2	94	56	24468	456	218	glmU	140	400	CDN81631.1	307
2567	8.11404	29.73	26.9	8.2	0	37	26	29730	456	42	glmU	6	44	MTT19636.1	8
2568	8.11404	29.73	26.9	8.2	0	37	26	29730	456	42	glmU	6	44	OLR34597.1	8
2569	8.11404	29.73	26.9	8.2	0	37	26	29730	456	42	glmU	6	44	CDN83352.1	8
2576	18.9531	28.571	49.7	7.59e-07	0	105	75	28571	554	135	glnS	31	113	OLR36862.1	9
2577	18.9531	28.571	49.3	8.87e-07	0	105	75	28571	554	135	glnS	31	123	MTT21217.1	19
2578	18.9531	28.571	49.3	8.87e-07	0	105	75	28571	554	135	glnS	31	123	CDN80528.1	19
2579	19.6751	25.688	30.8	1.1	4	109	60	25688	554	121	glnS	34	197	CDN81014.1	89
2580	19.6751	25.688	30.8	1.1	4	109	60	25688	554	121	glnS	34	150	MTT20715.1	42
2581	19.6751	25.688	30.8	1.1	4	109	60	25688	554	121	glnS	34	150	OLR37650.1	42
2582	7.40072	39.024	28.1	5.7	1	41	24	39024	554	177	glnS	138	342	MTT19802.1	302
2583	7.40072	39.024	28.1	5.7	1	41	24	39024	554	177	glnS	138	342	OLR35922.1	302
2584	7.40072	39.024	28.1	5.9	1	41	24	39024	554	177	glnS	138	346	CDN84321.1	306
2594	8.70488	36.585	29.3	2.2	0	41	26	36585	471	373	gltX	333	260	MTT20625.1	220
2595	8.70488	36.585	29.3	2.2	0	41	26	36585	471	373	gltX	333	260	OLR34388.1	220
2596	8.70488	36.585	29.3	2.2	0	41	26	36585	471	373	gltX	333	260	CDN84694.1	220
2597	7.85563	32.432	28.5	2.7	0	37	25	32432	471	203	gltX	167	147	MTT22296.1	111
2598	6.36943	36.667	26.9	9.2	0	30	19	36667	471	194	gltX	165	82	MTT20756.1	53
2599	6.36943	36.667	26.9	9.2	0	30	19	36667	471	194	gltX	165	82	OLR37299.1	53
2600	6.36943	36.667	26.9	9.2	0	30	19	36667	471	194	gltX	165	82	CDN81750.1	53
2601	5.52017	42.308	26.9	9.6	0	26	15	42308	471	325	gltX	300	213	MTT18182.1	188
2602	5.52017	42.308	26.9	9.6	0	26	15	42308	471	325	gltX	300	213	OLR35010.1	188
2603	5.52017	42.308	26.9	9.6	0	26	15	42308	471	325	gltX	300	213	CDN82362.1	188
2604	11.8896	30.357	26.9	9.7	2	56	36	30357	471	391	gltX	339	239	MTT20001.1	184
2605	11.8896	30.357	26.9	9.7	2	56	36	30357	471	391	gltX	339	239	OLR35072.1	184
2606	11.8896	30.357	26.9	9.7	2	56	36	30357	471	391	gltX	339	239	CDN83496.1	184
2610	35.9712	28.667	32.3	0.2	7	150	79	28667	417	204	glyA	77	321	MTT21488.1	178
2611	35.9712	28.667	32.3	0.2	7	150	79	28667	417	204	glyA	77	321	OLR38054.1	178
2612	35.9712	28.667	32.3	0.2	7	150	79	28667	417	204	glyA	77	324	CDN81061.1	181
2613	42.9257	24.581	31.2	0.51	9	179	107	24581	417	232	glyA	70	711	MTT19974.1	545
2614	42.9257	24.581	31.2	0.51	9	179	107	24581	417	232	glyA	70	711	OLR35098.1	545
2615	42.9257	24.581	31.2	0.51	9	179	107	24581	417	232	glyA	70	711	CDN83522.1	545
2616	27.0983	26.549	30	1.1	4	113	68	26549	417	200	glyA	93	211	CDN84783.1	109
2617	27.0983	26.549	29.6	1.3	4	113	68	26549	417	200	glyA	93	173	MTT20549.1	71
2618	27.0983	26.549	29.6	1.3	4	113	68	26549	417	200	glyA	93	173	OLR34311.1	71
2619	6.95444	41.379	25.8	5	0	29	17	41379	417	255	glyA	227	66	CDN82209.1	38
2620	6.95444	41.379	25.4	5.5	0	29	17	41379	417	255	glyA	227	57	MTT18332.1	29
2621	6.95444	41.379	25.4	5.5	0	29	17	41379	417	255	glyA	227	57	OLR34858.1	29
2622	13.6691	31.579	26.2	8.2	1	57	29	31579	417	378	glyA	332	125	CDN82760.1	69
2623	37.4101	21.795	27.3	8.6	6	156	99	21795	417	310	glyA	163	364	MTT19829.1	224
2624	37.4101	21.795	27.3	8.6	6	156	99	21795	417	310	glyA	163	364	OLR35895.1	224
2625	37.4101	21.795	27.3	8.6	6	156	99	21795	417	310	glyA	163	364	CDN84349.1	224
2629	41.5842	24.603	33.1	0.063	4	126	83	24603	303	196	glyQ	76	183	MTT18053.1	65
2630	41.5842	24.603	33.1	0.063	4	126	83	24603	303	196	glyQ	76	183	OLR36365.1	65
2631	41.5842	24.603	33.1	0.063	4	126	83	24603	303	196	glyQ	76	183	CDN85027.1	65
2632	35.9736	28.44	27.7	4.5	5	109	55	28440	303	139	glyQ	36	441	MTT20029.1	351
2633	35.9736	28.44	27.7	4.5	5	109	55	28440	303	139	glyQ	36	441	CDN83467.1	351
2634	8.91089	33.333	26.9	6.5	0	27	18	33333	303	184	glyQ	158	552	MTT20364.1	526
2635	8.91089	33.333	26.9	6.5	0	27	18	33333	303	184	glyQ	158	552	OLR30142.1	526
2636	8.91089	33.333	26.9	6.5	0	27	18	33333	303	184	glyQ	158	552	CDN82373.1	526
2640	22.061	26.974	28.9	4.8	4	152	92	26974	689	649	glyS	499	840	OLR29076.1	707
2641	11.4659	26.582	28.5	6.3	1	79	56	26582	689	576	glyS	500	276	MTT19648.1	198
2642	11.4659	26.582	28.5	6.3	1	79	56	26582	689	576	glyS	500	276	OLR34586.1	198
2643	11.4659	26.582	28.5	6.3	1	79	56	26582	689	576	glyS	500	276	CDN83339.1	198
2647	97.5845	27.723	50.4	2.76e-08	7	202	123	27723	207	201	gmk	4	185	MTT17996.1	3
2648	97.5845	27.723	50.4	2.76e-08	7	202	123	27723	207	201	gmk	4	185	OLR36420.1	3
2649	97.5845	27.723	50.4	2.76e-08	7	202	123	27723	207	201	gmk	4	185	CDN84965.1	3
2650	82.6087	22.222	36.6	0.003	6	171	113	22222	207	159	gmk	3	190	OLR29449.1	26
2651	82.6087	22.222	36.6	0.003	6	171	113	22222	207	159	gmk	3	190	MTT22121.1	26
2652	95.1691	22.843	32	0.092	6	197	111	22843	207	196	gmk	1	196	CDN84185.1	40
2653	95.1691	22.843	32	0.093	6	197	111	22843	207	196	gmk	1	183	MTT19337.1	27
2654	95.1691	22.843	32	0.093	6	197	111	22843	207	196	gmk	1	183	OLR32886.1	27
2655	13.5266	39.286	30.8	0.15	0	28	17	39286	207	28	gmk	1	51	MTT20150.1	24
2656	13.5266	39.286	30.8	0.15	0	28	17	39286	207	28	gmk	1	51	OLR37496.1	24
2657	13.5266	39.286	30.8	0.15	0	28	17	39286	207	28	gmk	1	51	CDN81176.1	24
2658	27.0531	32.143	28.9	0.69	2	56	22	32143	207	56	gmk	3	101	CDN81230.1	60
2659	16.9082	28.571	28.9	0.7	0	35	25	28571	207	35	gmk	1	60	MTT20797.1	26
2660	16.9082	28.571	28.9	0.7	0	35	25	28571	207	35	gmk	1	60	OLR37257.1	26
2661	16.9082	28.571	28.9	0.7	0	35	25	28571	207	35	gmk	1	60	CDN81699.1	26
2662	27.0531	32.143	28.9	0.71	2	56	22	32143	207	56	gmk	3	68	MTT20095.1	27
2663	27.0531	32.143	28.9	0.71	2	56	22	32143	207	56	gmk	3	68	OLR37442.1	27
2664	16.9082	42.857	28.1	1.3	1	35	17	42857	207	56	gmk	25	233	MTT19628.1	199
2665	16.9082	42.857	28.1	1.3	1	35	17	42857	207	56	gmk	25	233	OLR34605.1	199
2666	16.9082	42.857	28.1	1.3	1	35	17	42857	207	56	gmk	25	233	CDN83361.1	199
2667	14.4928	43.333	28.1	1.5	0	30	17	43333	207	73	gmk	44	322	CDN82932.1	293
2668	14.4928	43.333	28.1	1.5	0	30	17	43333	207	73	gmk	44	311	MTT17751.1	282
2669	14.4928	43.333	28.1	1.5	0	30	17	43333	207	73	gmk	44	311	OLR36129.1	282
2670	12.0773	52	28.1	1.7	0	25	12	52000	207	28	gmk	4	242	CDN85044.1	218
2671	12.0773	52	28.1	1.7	0	25	12	52000	207	28	gmk	4	231	MTT18070.1	207
2672	12.0773	52	28.1	1.7	0	25	12	52000	207	28	gmk	4	231	OLR36348.1	207
2673	13.5266	35.714	27.7	1.8	0	28	18	35714	207	37	gmk	10	60	MTT20723.1	33
2674	13.5266	35.714	27.7	1.8	0	28	18	35714	207	37	gmk	10	60	OLR37642.1	33
2675	13.5266	35.714	27.7	1.8	0	28	18	35714	207	37	gmk	10	60	CDN81023.1	33
2676	38.6473	30	27.7	2	3	80	39	30000	207	86	gmk	13	106	MTT18626.1	38
2677	38.6473	30	27.7	2	3	80	39	30000	207	86	gmk	13	106	OLR36992.1	38
2678	38.6473	30	27.7	2	3	80	39	30000	207	86	gmk	13	106	CDN81415.1	38
2679	27.0531	26.786	27.3	2.5	2	56	33	26786	207	130	gmk	78	428	MTT19426.1	378
2680	27.0531	26.786	27.3	2.5	2	56	33	26786	207	130	gmk	78	428	OLR35501.1	378
2681	27.0531	26.786	27.3	2.5	2	56	33	26786	207	130	gmk	78	428	CDN83217.1	378
2682	11.5942	37.5	27.3	3.1	0	24	15	37500	207	25	gmk	2	51	MTT19129.1	28
2683	11.5942	37.5	27.3	3.1	0	24	15	37500	207	25	gmk	2	51	OLR37869.1	28
2684	11.5942	37.5	27.3	3.1	0	24	15	37500	207	25	gmk	2	51	CDN80786.1	28
2685	18.3575	34.211	26.6	5	1	38	24	34211	207	204	gmk	167	318	CDN83727.1	282
2686	18.3575	34.211	26.6	5	1	38	24	34211	207	204	gmk	167	317	MTT20230.1	281
2687	18.3575	34.211	26.6	5	1	38	24	34211	207	204	gmk	167	317	OLR35592.1	281
2688	24.6377	27.451	26.2	6	1	51	25	27451	207	204	gmk	166	322	MTT21122.1	272
2689	24.6377	27.451	26.2	6	1	51	25	27451	207	204	gmk	166	322	OLR35798.1	272
2690	24.6377	27.451	26.2	6	1	51	25	27451	207	204	gmk	166	330	CDN84517.1	280
2691	11.1111	43.478	26.2	6.2	0	23	13	43478	207	26	gmk	4	392	MTT21685.1	370
2692	11.1111	43.478	26.2	6.7	0	23	13	43478	207	26	gmk	4	362	OLR32760.1	340
2693	11.1111	43.478	26.2	6.7	0	23	13	43478	207	26	gmk	4	362	CDN82599.1	340
2694	11.5942	37.5	25.8	7.6	0	24	15	37500	207	24	gmk	1	50	MTT22165.1	27
2695	11.5942	37.5	25.8	7.6	0	24	15	37500	207	24	gmk	1	50	OLR32798.1	27
2696	11.5942	37.5	25.8	7.6	0	24	15	37500	207	24	gmk	1	50	CDN82658.1	27
2697	9.17874	42.105	25.8	7.7	0	19	11	42105	207	22	gmk	4	51	MTT19034.1	33
2698	9.17874	42.105	25.8	7.7	0	19	11	42105	207	22	gmk	4	51	OLR37773.1	33
2699	9.17874	42.105	25.8	7.7	0	19	11	42105	207	22	gmk	4	51	CDN80884.1	33
2700	30.4348	33.333	25	7.9	2	63	38	33333	207	73	gmk	13	105	MTT22502.1	45
2701	12.0773	36	25.8	8.3	0	25	16	36000	207	25	gmk	1	51	MTT18182.1	27
2702	12.0773	36	25.8	8.3	0	25	16	36000	207	25	gmk	1	51	OLR35010.1	27
2703	12.0773	36	25.8	8.3	0	25	16	36000	207	25	gmk	1	51	CDN82362.1	27
2704	28.9855	33.333	25.8	8.4	2	60	36	33333	207	70	gmk	13	102	OLR28742.1	45
2705	28.9855	33.333	25.8	8.4	2	60	36	33333	207	70	gmk	13	102	CDN85206.1	45
2706	14.0097	37.931	25.4	8.6	0	29	18	37931	207	147	gmk	119	121	MTT17790.1	93
2707	14.0097	37.931	25.4	8.6	0	29	18	37931	207	147	gmk	119	121	OLR36167.1	93
2708	14.0097	37.931	25.4	8.6	0	29	18	37931	207	147	gmk	119	121	CDN82972.1	93
2709	24.1546	32	25.8	8.7	0	50	34	32000	207	134	gmk	85	365	MTT21483.1	316
2710	24.1546	32	25.8	8.7	0	50	34	32000	207	134	gmk	85	365	OLR37601.1	316
2711	24.1546	32	25.8	8.7	0	50	34	32000	207	134	gmk	85	365	CDN81066.1	316
2712	14.0097	34.483	25.4	9.5	0	29	19	34483	207	29	gmk	1	52	MTT19155.1	24
2713	14.0097	34.483	25.4	9.5	0	29	19	34483	207	29	gmk	1	52	OLR37895.1	24
2714	14.0097	34.483	25.4	9.5	0	29	19	34483	207	29	gmk	1	52	CDN80756.1	24
2718	53.6873	27.473	30.8	0.46	8	182	88	27473	339	225	gpsA	54	452	CDN80816.1	305
2719	53.6873	27.473	30.8	0.48	8	182	88	27473	339	225	gpsA	54	386	MTT19099.1	239
2720	53.6873	27.473	30.8	0.48	8	182	88	27473	339	225	gpsA	54	386	OLR37839.1	239
2721	13.5693	28.261	30.8	0.52	0	46	33	28261	339	46	gpsA	1	440	MTT18884.1	395
2722	13.5693	28.261	30.8	0.52	0	46	33	28261	339	46	gpsA	1	440	OLR36685.1	395
2723	13.5693	28.261	30.8	0.52	0	46	33	28261	339	46	gpsA	1	440	CDN80417.1	395
2724	19.174	30.769	30.8	0.55	2	65	37	30769	339	205	gpsA	148	231	MTT18419.1	168
2725	19.174	30.769	30.8	0.55	2	65	37	30769	339	205	gpsA	148	231	OLR34473.1	168
2726	19.174	30.769	30.8	0.55	2	65	37	30769	339	205	gpsA	148	231	CDN82119.1	168
2727	11.5044	35.897	30	0.84	0	39	25	35897	339	39	gpsA	1	180	MTT21307.1	142
2728	11.5044	35.897	30	0.84	0	39	25	35897	339	39	gpsA	1	180	OLR34738.1	142
2729	11.5044	35.897	30	0.84	0	39	25	35897	339	39	gpsA	1	180	CDN83957.1	142
2730	9.14454	41.935	29.3	1.7	0	31	18	41935	339	34	gpsA	4	403	MTT20330.1	373
2731	9.14454	41.935	29.3	1.7	0	31	18	41935	339	34	gpsA	4	403	OLR35694.1	373
2732	9.14454	41.935	29.3	1.7	0	31	18	41935	339	34	gpsA	4	403	CDN83831.1	373
2733	9.43953	43.75	28.9	2.1	0	32	18	43750	339	39	gpsA	8	361	MTT19521.1	330
2734	9.43953	43.75	28.9	2.1	0	32	18	43750	339	39	gpsA	8	361	OLR35408.1	330
2735	9.43953	43.75	28.9	2.1	0	32	18	43750	339	39	gpsA	8	361	CDN83122.1	330
2736	18.5841	30.159	27.7	2.2	2	63	39	30159	339	220	gpsA	162	63	MTT21963.1	2
2737	18.5841	30.159	27.7	2.2	2	63	39	30159	339	220	gpsA	162	63	OLR35541.1	2
2738	21.5339	34.247	28.5	2.7	2	73	44	34247	339	94	gpsA	24	761	OLR37026.1	691
2739	21.5339	34.247	28.5	2.8	2	73	44	34247	339	94	gpsA	24	771	MTT18664.1	701
2740	21.5339	34.247	28.5	2.8	2	73	44	34247	339	94	gpsA	24	771	CDN81453.1	701
2741	18.5841	30.159	27.3	3	2	63	39	30159	339	220	gpsA	162	63	CDN83673.1	2
2742	10.9145	40.541	26.9	3.8	0	37	22	40541	339	312	gpsA	276	114	MTT19418.1	78
2743	10.9145	40.541	26.9	3.8	0	37	22	40541	339	312	gpsA	276	114	OLR35509.1	78
2744	10.9145	40.541	26.9	3.8	0	37	22	40541	339	312	gpsA	276	114	CDN83225.1	78
2745	16.8142	28.07	27.3	4.1	1	57	40	28070	339	305	gpsA	249	77	MTT21536.1	22
2746	16.8142	28.07	27.3	4.1	1	57	40	28070	339	305	gpsA	249	77	OLR35319.1	22
2747	16.8142	28.07	27.3	4.1	1	57	40	28070	339	305	gpsA	249	77	CDN82012.1	22
2748	10.6195	41.667	27.7	4.4	0	36	21	41667	339	39	gpsA	4	344	MTT19991.1	309
2749	10.6195	41.667	27.7	4.4	0	36	21	41667	339	39	gpsA	4	344	OLR35082.1	309
2750	10.6195	41.667	27.7	4.5	0	36	21	41667	339	39	gpsA	4	349	CDN83506.1	314
2751	6.19469	57.143	26.9	6	0	21	9	57143	339	31	gpsA	11	26	MTT21895.1	6
2752	6.19469	57.143	26.9	6	0	21	9	57143	339	31	gpsA	11	26	OLR37759.1	6
2753	6.19469	57.143	26.9	6	0	21	9	57143	339	31	gpsA	11	26	CDN80901.1	6
2754	12.3894	35.714	26.9	7.8	2	42	22	35714	339	39	gpsA	1	40	MTT19163.1	1
2755	12.3894	35.714	26.9	7.8	2	42	22	35714	339	39	gpsA	1	40	OLR37903.1	1
2756	12.3894	35.714	26.9	7.8	2	42	22	35714	339	39	gpsA	1	40	CDN80746.1	1
2757	56.3422	25.131	26.6	9.1	8	191	114	25131	339	236	gpsA	53	243	MTT21344.1	75
2758	56.3422	25.131	26.6	9.1	8	191	114	25131	339	236	gpsA	53	243	OLR34771.1	75
2759	56.3422	25.131	26.6	9.1	8	191	114	25131	339	236	gpsA	53	243	CDN83920.1	75
2763	9.12409	32	28.1	6.8	2	50	28	32000	548	499	groL	450	135	CDN81137.1	92
2764	9.12409	32	28.1	6.9	2	50	28	32000	548	499	groL	450	127	MTT20187.1	84
2765	9.12409	32	28.1	6.9	2	50	28	32000	548	499	groL	450	127	OLR37533.1	84
2769	24.7423	45.833	25.4	2	0	24	13	45833	97	90	groS	67	111	MTT20408.1	88
2770	24.7423	45.833	25.4	2	0	24	13	45833	97	90	groS	67	111	OLR34165.1	88
2771	24.7423	45.833	25.4	2	0	24	13	45833	97	90	groS	67	111	CDN82419.1	88
2772	52.5773	31.373	25.4	2.6	0	51	35	31373	97	62	groS	12	484	MTT18420.1	434
2773	52.5773	31.373	25.4	2.6	0	51	35	31373	97	62	groS	12	484	OLR34470.1	434
2774	52.5773	31.373	25.4	2.6	0	51	35	31373	97	62	groS	12	484	CDN82114.1	434
2775	79.3814	24.675	24.3	7.5	0	77	58	24675	97	93	groS	17	291	MTT19473.1	215
2776	79.3814	24.675	24.3	7.5	0	77	58	24675	97	93	groS	17	291	OLR35455.1	215
2777	79.3814	24.675	24.3	7.5	0	77	58	24675	97	93	groS	17	291	CDN83170.1	215
2778	49.4845	39.583	23.5	9.2	2	48	27	39583	97	77	groS	31	72	MTT20537.1	26
2779	49.4845	39.583	23.5	9.2	2	48	27	39583	97	77	groS	31	72	OLR34299.1	26
2780	49.4845	39.583	23.5	9.2	2	48	27	39583	97	77	groS	31	72	CDN84795.1	26
2784	42.132	30.12	26.6	4	3	83	42	30120	197	102	grpE	36	99	OLR27830.1	17
2785	42.132	30.12	26.6	4	3	83	42	30120	197	102	grpE	36	99	CDN85180.1	17
2786	42.132	30.12	26.6	4	3	83	42	30120	197	102	grpE	36	99	CDN83622.1	17
2787	42.132	30.12	26.6	4.7	3	83	42	30120	197	102	grpE	36	122	MTT22448.1	40
2794	36.5714	26.042	49.3	1.46e-06	4	192	127	26042	525	196	guaA	10	185	MTT20854.1	4
2795	36.5714	26.042	49.3	1.46e-06	4	192	127	26042	525	196	guaA	10	185	OLR35182.1	4
2796	36.5714	26.042	49.3	1.46e-06	4	192	127	26042	525	196	guaA	10	185	CDN81874.1	4
2797	17.9048	32.979	44.3	4.31e-05	3	94	54	32979	525	97	guaA	8	280	MTT18899.1	192
2798	17.9048	32.979	44.3	4.31e-05	3	94	54	32979	525	97	guaA	8	280	OLR36669.1	192
2799	17.9048	32.979	44.3	4.74e-05	3	94	54	32979	525	97	guaA	8	289	CDN80401.1	201
2800	25.7143	26.667	38.5	0.002	5	135	70	26667	525	198	guaA	81	194	MTT21359.1	72
2801	25.7143	26.667	38.5	0.002	5	135	70	26667	525	198	guaA	81	194	OLR33543.1	72
2802	25.7143	26.667	38.5	0.002	5	135	70	26667	525	198	guaA	81	194	CDN82700.1	72
2803	6.47619	52.941	34.3	0.057	1	34	15	52941	525	262	guaA	229	39	MTT18794.1	7
2804	6.47619	52.941	34.3	0.057	1	34	15	52941	525	262	guaA	229	39	OLR37154.1	7
2805	6.47619	52.941	34.3	0.058	1	34	15	52941	525	262	guaA	229	54	CDN81591.1	22
2806	14.2857	32	29.6	1.9	2	75	37	32000	525	324	guaA	250	194	OLR37287.1	134
2807	14.2857	32	29.3	2.3	2	75	37	32000	525	324	guaA	250	203	CDN81733.1	143
2808	11.2381	28.814	29.3	2.4	1	59	39	28814	525	108	guaA	53	404	MTT19606.1	346
2809	11.2381	28.814	29.3	2.4	1	59	39	28814	525	108	guaA	53	404	OLR34628.1	346
2810	11.2381	28.814	29.3	2.4	1	59	39	28814	525	108	guaA	53	404	CDN83384.1	346
2811	12.9524	26.471	28.5	4.3	2	68	46	26471	525	144	guaA	79	107	MTT19784.1	42
2812	12.9524	26.471	28.5	4.3	2	68	46	26471	525	144	guaA	79	107	OLR35940.1	42
2813	12.9524	26.471	28.5	4.4	2	68	46	26471	525	144	guaA	79	122	CDN84303.1	57
2814	32.1905	22.485	28.1	4.6	8	169	106	22485	525	201	guaA	46	251	MTT17887.1	95
2815	32.1905	22.485	28.1	4.6	8	169	106	22485	525	201	guaA	46	251	OLR36530.1	95
2816	32.1905	22.485	28.1	4.6	8	169	106	22485	525	201	guaA	46	251	CDN84847.1	95
2823	7.54286	30.303	30	2.6	1	66	43	30303	875	143	gyrA	81	199	MTT21899.1	134
2824	7.54286	30.303	30	2.6	1	66	43	30303	875	143	gyrA	81	199	OLR37755.1	134
2825	7.54286	30.303	30	2.7	1	66	43	30303	875	143	gyrA	81	201	CDN80905.1	136
2826	3.54286	41.935	28.9	4.6	1	31	17	41935	875	213	gyrA	184	207	OLR37967.1	177
2827	9.94286	25.287	28.5	6.2	1	87	52	25287	875	475	gyrA	402	129	MTT19030.1	43
2828	9.94286	25.287	28.5	6.2	1	87	52	25287	875	475	gyrA	402	129	OLR38057.1	43
2829	9.94286	25.287	28.5	6.5	1	87	52	25287	875	475	gyrA	402	140	CDN80888.1	54
2830	12.5714	23.636	27.7	9.1	4	110	72	23636	875	251	gyrA	146	127	MTT21157.1	26
2831	12.5714	23.636	27.7	9.1	4	110	72	23636	875	251	gyrA	146	127	OLR36850.1	26
2832	12.5714	23.636	27.7	9.1	4	110	72	23636	875	251	gyrA	146	127	CDN80592.1	26
2837	8.20896	43.939	54.3	7.44e-08	2	66	28	43939	804	794	gyrB	735	621	MTT20279.1	559
2839	8.20896	43.939	54.3	7.44e-08	2	66	28	43939	804	794	gyrB	735	621	OLR35646.1	559
2841	8.20896	43.939	54.3	7.44e-08	2	66	28	43939	804	794	gyrB	735	621	CDN83779.1	559
2842	18.7811	23.179	33.5	0.19	4	151	100	23179	804	412	gyrB	267	371	CDN83043.1	232
2843	18.7811	23.179	33.5	0.2	4	151	100	23179	804	412	gyrB	267	358	MTT17858.1	219
2844	18.7811	23.179	33.5	0.2	4	151	100	23179	804	412	gyrB	267	358	OLR30453.1	219
2845	7.46269	35	29.3	3.4	3	60	31	35000	804	225	gyrB	171	334	CDN82699.1	278
2846	7.46269	35	29.3	3.5	3	60	31	35000	804	225	gyrB	171	333	MTT21358.1	277
2847	7.46269	35	29.3	3.5	3	60	31	35000	804	225	gyrB	171	333	OLR33542.1	277
2848	4.72637	28.947	26.2	7.4	0	38	27	28947	804	68	gyrB	31	57	MTT22403.1	20
2849	4.72637	28.947	26.2	7.4	0	38	27	28947	804	68	gyrB	31	57	OLR37349.1	20
2850	4.72637	28.947	26.2	7.9	0	38	27	28947	804	68	gyrB	31	60	CDN81805.1	23
2851	5.59701	37.778	26.9	9.4	1	45	24	37778	804	458	gyrB	418	96	CDN81292.1	52
2858	63.9485	21.477	29.6	0.54	4	149	93	21477	233	160	hda	21	208	MTT22258.1	75
2859	63.9485	21.477	29.6	0.54	4	149	93	21477	233	160	hda	21	208	CDN84462.1	75
2860	12.0172	42.857	27.3	2.2	0	28	16	42857	233	84	hda	57	95	MTT18819.1	68
2861	12.0172	42.857	27.3	2.2	0	28	16	42857	233	84	hda	57	95	OLR36749.1	68
2862	12.0172	42.857	27.3	2.2	0	28	16	42857	233	84	hda	57	95	CDN80485.1	68
2863	14.5923	38.235	27.7	2.7	1	34	18	38235	233	146	hda	116	115	MTT17763.1	82
2864	14.5923	38.235	27.7	2.7	1	34	18	38235	233	146	hda	116	115	OLR36141.1	82
2865	14.5923	38.235	27.7	2.7	1	34	18	38235	233	146	hda	116	178	CDN82944.1	145
2866	26.1803	32.787	26.9	4	2	61	36	32787	233	74	hda	17	130	MTT18973.1	72
2867	26.1803	32.787	26.9	4	2	61	36	32787	233	74	hda	17	130	OLR36594.1	72
2868	26.1803	32.787	26.9	4	2	61	36	32787	233	74	hda	17	130	CDN85308.1	72
2869	23.176	25.926	26.2	8.4	1	54	38	25926	233	159	hda	108	466	MTT18170.1	413
2870	23.176	25.926	26.2	8.4	1	54	38	25926	233	159	hda	108	466	OLR36252.1	413
2871	23.176	25.926	26.2	8.4	1	54	38	25926	233	159	hda	108	466	CDN85146.1	413
2872	15.8798	32.432	26.2	8.7	1	37	18	32432	233	85	hda	49	1392	CDN83703.1	1363
2873	10.3004	41.667	25.8	9.5	0	24	14	41667	233	124	hda	101	213	MTT21876.1	190
2874	10.3004	41.667	25.8	9.5	0	24	14	41667	233	124	hda	101	213	OLR30497.1	190
2875	10.3004	41.667	25.8	9.5	0	24	14	41667	233	124	hda	101	213	CDN85237.1	190
2879	38.5167	24.224	31.6	0.45	6	161	79	24224	418	137	hemA	7	415	CDN83660.1	268
2880	24.4019	28.431	28.1	3.3	4	102	61	28431	418	257	hemA	167	129	MTT21486.1	29
2881	24.4019	28.431	28.1	3.3	4	102	61	28431	418	257	hemA	167	129	OLR37604.1	29
2882	24.4019	28.431	28.1	3.3	4	102	61	28431	418	257	hemA	167	129	CDN81063.1	29
2883	19.6172	31.707	28.1	4.8	3	82	49	31707	418	237	hemA	157	300	CDN83173.1	225
2884	19.6172	31.707	27.7	5.8	3	82	49	31707	418	237	hemA	157	282	MTT19470.1	207
2885	19.6172	31.707	27.7	5.8	3	82	49	31707	418	237	hemA	157	282	OLR35458.1	207
2886	13.6364	26.316	27.7	6.8	0	57	42	26316	418	407	hemA	351	563	CDN84686.1	507
2887	13.6364	26.316	27.3	7.3	0	57	42	26316	418	407	hemA	351	521	MTT20953.1	465
2888	13.6364	26.316	27.3	7.3	0	57	42	26316	418	407	hemA	351	521	OLR34135.1	465
2889	8.37321	31.429	26.6	8.5	0	35	24	31429	418	133	hemA	99	163	MTT21092.1	129
2890	8.37321	31.429	26.6	8.5	0	35	24	31429	418	133	hemA	99	163	OLR35770.1	129
2891	8.37321	31.429	26.6	8.5	0	35	24	31429	418	133	hemA	99	163	CDN84546.1	129
2895	15.1235	36.735	28.5	2.5	2	49	22	36735	324	92	hemB	49	321	OLR37970.1	277
2896	15.1235	36.735	28.5	2.5	2	49	22	36735	324	92	hemB	49	321	CDN80674.1	277
2897	9.5679	32.258	27.7	4	0	31	21	32258	324	280	hemB	250	421	MTT18928.1	391
2898	9.5679	32.258	27.7	4	0	31	21	32258	324	280	hemB	250	421	OLR36638.1	391
2899	9.5679	32.258	27.7	4	0	31	21	32258	324	280	hemB	250	421	CDN80373.1	391
2900	14.1975	34.783	27.3	5.4	2	46	25	34783	324	60	hemB	15	481	MTT18565.1	441
2901	14.1975	34.783	27.3	5.4	2	46	25	34783	324	60	hemB	15	481	CDN81353.1	441
2902	14.1975	34.783	27.3	5.6	2	46	25	34783	324	60	hemB	15	460	OLR37374.1	420
2903	9.87654	43.75	27.3	6.4	0	32	18	43750	324	70	hemB	39	601	MTT20613.1	570
2904	9.87654	43.75	27.3	6.4	0	32	18	43750	324	70	hemB	39	601	OLR34377.1	570
2905	9.87654	43.75	27.3	6.4	0	32	18	43750	324	70	hemB	39	601	CDN84709.1	570
2909	38.6581	27.273	32.3	0.12	5	121	67	27273	313	163	hemC	56	205	CDN81537.1	93
2910	38.6581	27.273	32.3	0.13	5	121	67	27273	313	163	hemC	56	195	MTT18743.1	83
2911	38.6581	27.273	32.3	0.13	5	121	67	27273	313	163	hemC	56	195	OLR37105.1	83
2912	26.8371	26.19	31.6	0.24	0	84	62	26190	313	228	hemC	145	220	MTT20236.1	137
2913	26.8371	26.19	31.6	0.24	0	84	62	26190	313	228	hemC	145	220	OLR35598.1	137
2914	26.8371	26.19	31.6	0.24	0	84	62	26190	313	228	hemC	145	220	CDN83733.1	137
2915	40.8946	22.656	29.3	0.9	6	128	79	22656	313	143	hemC	24	151	MTT17655.1	36
2916	40.8946	22.656	29.3	0.9	6	128	79	22656	313	143	hemC	24	151	OLR36029.1	36
2917	40.8946	22.656	29.3	0.9	6	128	79	22656	313	143	hemC	24	151	CDN82832.1	36
2918	12.4601	38.462	27.3	4.4	0	39	24	38462	313	91	hemC	53	44	MTT19400.1	6
2919	12.4601	38.462	27.3	4.4	0	39	24	38462	313	91	hemC	53	44	OLR32824.1	6
2920	12.4601	38.462	27.3	4.4	0	39	24	38462	313	91	hemC	53	44	CDN84255.1	6
2921	9.26518	44.828	26.9	5.6	0	29	16	44828	313	144	hemC	116	62	MTT19902.1	34
2922	27.7955	33.333	26.9	6.3	4	87	47	33333	313	236	hemC	156	219	MTT20853.1	138
2923	27.7955	33.333	26.9	6.3	4	87	47	33333	313	236	hemC	156	219	OLR35181.1	138
2924	27.7955	33.333	26.9	6.7	4	87	47	33333	313	236	hemC	156	219	CDN81873.1	138
2925	9.26518	44.828	26.9	6.9	0	29	16	44828	313	144	hemC	116	62	CDN84424.1	34
2929	13.4146	42.424	27.3	2.7	0	33	19	42424	246	134	hemD	102	124	MTT21557.1	92
2930	13.4146	42.424	27.3	2.7	0	33	19	42424	246	134	hemD	102	124	OLR35299.1	92
2931	13.4146	42.424	27.3	2.7	0	33	19	42424	246	134	hemD	102	124	CDN81991.1	92
2932	19.1057	34.043	27.3	2.8	2	47	22	34043	246	231	hemD	188	142	MTT21088.1	102
2933	19.1057	34.043	27.3	2.8	2	47	22	34043	246	231	hemD	188	142	OLR35766.1	102
2934	19.1057	34.043	27.3	2.8	2	47	22	34043	246	231	hemD	188	142	CDN84550.1	102
2935	30.0813	31.081	26.9	4	2	74	48	31081	246	91	hemD	20	319	MTT21637.1	247
2936	30.0813	31.081	26.9	4	2	74	48	31081	246	91	hemD	20	319	OLR37984.1	247
2937	30.0813	31.081	26.9	4	2	74	48	31081	246	91	hemD	20	319	CDN80659.1	247
2938	9.34959	39.13	26.2	8.4	0	23	14	39130	246	232	hemD	210	264	MTT17741.1	242
2939	9.34959	39.13	26.2	8.4	0	23	14	39130	246	232	hemD	210	264	OLR36120.1	242
2940	9.34959	39.13	26.2	8.4	0	23	14	39130	246	232	hemD	210	264	CDN82922.1	242
2941	24.3902	28.333	25.8	9.3	1	60	35	28333	246	79	hemD	20	198	MTT21588.1	147
2942	24.3902	28.333	25.8	9.3	1	60	35	28333	246	79	hemD	20	198	OLR38031.1	147
2943	24.3902	28.333	25.8	9.9	1	60	35	28333	246	79	hemD	20	203	CDN80607.1	152
2947	19.774	27.143	31.2	0.46	3	70	45	27143	354	292	hemE	223	1079	MTT20036.1	1016
2948	19.774	27.143	31.2	0.46	3	70	45	27143	354	292	hemE	223	1079	OLR35036.1	1016
2949	19.774	27.143	31.2	0.46	3	70	45	27143	354	292	hemE	223	1079	CDN83460.1	1016
2950	40.113	22.535	26.9	7.4	3	142	83	22535	354	202	hemE	77	299	MTT19539.1	169
2951	40.113	22.535	26.9	7.4	3	142	83	22535	354	202	hemE	77	299	OLR35391.1	169
2952	40.113	22.535	26.9	7.4	3	142	83	22535	354	202	hemE	77	299	CDN83104.1	169
2953	23.1638	30.488	26.2	10	3	82	51	30488	354	308	hemE	229	127	MTT18922.1	50
2954	23.1638	30.488	26.2	10	3	82	51	30488	354	308	hemE	229	127	OLR36645.1	50
2955	23.1638	30.488	26.2	10	3	82	51	30488	354	308	hemE	229	127	CDN80379.1	50
[truncated: 2,811 more rows]

## Sheet: Hit vs no hit
	Hits	Hits over cutoff	Hits under cutoff	No hits
0	yciS	dicA	racR	yqeL
1	pth	rbfA	cohE
2	aspS	yciS	ymiB
3	tusE	ydhL	ykfM
4	racR	pth	ydcD
5	hemH	trpS	ymfE
6	glmU	rpsE	yncH
7	glmS	yobI	yqcG
8	hemL	rpmA	ynbG
9	hemB	hemA	ydaE
10	hemC	waaA	ydaS
11	hemA	aspS	yjbS
12	hemG	nusB	ygeG
13	hemD	safA	relB
14	hemE	ubiD	yffS
15	glmM	rpsB
16	hscA	gmk
17	acpP	rpmB
18	acpS	rpsS
19	birA	mreB
20	folP	mreC
21	folE	priB
22	folD	rpoC
23	folA	wzyE
24	trmD	mreD
25	folC	pheT
26	folB	zipA
27	can	tusE
28	rpoC	tktA
29	rpoB	nrdA
30	rpoA	tsf
31	rpoE	rnt
32	rpoD	adk
33	rpoH	trmD
34	cysS	rpsL
35	gltX	ssb
36	iraM	mrdA
37	gpsA	asnS
38	mrdA	psd
39	holA	rpsJ
40	mrdB	ptsI
41	valS	plsC
42	rpsG	plsB
43	rpsF	leuS
44	rpsE	metK
45	rpsD	rpsF
46	rpsC	rimM
47	rpsB	ftsB
48	rpsA	nadK
49	rpsO	hemH
50	rpsN	glmU
51	rpsM	glmS
52	rpsL	ftsA
53	rpsK	rluD
54	rpsJ	hemB
55	rpsI	hemC
56	rpsH	yihA
57	rpsU	ftsL
58	rpsT	ubiA
59	rpsS	hemD
60	rpsR	ftsI
61	rpsQ	ftsH
62	rpsP	ftsW
63	thrS	csrA
64	cohE	rpsT
65	fbaA	ftsQ
66	ymiB	nusG
67	ykfM	rpe
68	rnpA	glmM
69	yihA	rplA
70	thiL	ftsZ
71	ygfZ	ftsY
72	der	cdsA
73	era	dapA
74	cdsA	lolB
75	holD	lolA
76	holB	dapB
77	def	acpP
78	mnmA	dapD
79	dxs	lolE
80	dxr	acpS
81	tilS	rplV
82	purB	lnt
83	ydcD	rplT
84	eno	ffh
85	yqgF	proS
86	secA	rplS
87	map	rplP
88	tsaB	hemG
89	tsaC	rplN
90	secE	kdsA
91	tsaE	kdsB
92	ileS	rplM
93	coaE	rplJ
94	coaD	grpE
95	coaA	hisS
96	ymfE	birA
97	groL	secE
98	sucA	lolC
99	sucB	hemE
100	groS	rplB
101	yncH	rplC
102	ffh	prfA
103	safA	cydX
104	tsf	gapA
105	tktA	murJ
106	ycaR	hscA
107	higA	folP
108	nadK	murA
109	ftsB	murB
110	ftsA	murC
111	ftsL	murD
112	ftsI	murE
113	ftsH	murF
114	ftsW	murG
115	ftsQ	folE
116	ftsZ	folD
117	ftsY	yqgF
118	lolC	alaS
119	lolB	folA
120	waaA	metG
121	dapB	folC
122	dapE	folB
123	dapD	cydA
124	lolE	cydB
125	dapF	cydC
126	rplV	cydD
127	rplW	can
128	rplT	rsgA
129	rplU	pssA
130	rplR	rpsD
131	rplS	hda
132	rplP	prfB
133	rplQ	tadA
134	rplN	dcd
135	kdsA	tmk
136	kdsB	orn
137	rplM	rpoB
138	rplJ	rpoA
139	rplK	tonB
140	rplF	rnpA
141	tsaD	asd
142	rplD	ribA
143	rplE	yidC
144	rplB	ribC
145	rplC	rpoH
146	rplA	ribE
147	nrdA	ribD
148	nrdB	cysS
149	ligA	ribF
150	rbfA	lpxH
151	metG	gltX
152	metK	lpxK
153	prfA	lpxL
154	prfB	prmC
155	orn	iraM
156	asd	iscS
157	prmC	lpxB
158	ispU	argS
159	argS	lpxD
160	ispH	pheM
161	ispD	holB
162	ispE	obgE
163	ispF	gpsA
164	ispG	map
165	ispA	ispH
166	ispB	holA
167	glyS	pyrH
168	glyQ	ileS
169	pgk	ispD
170	dfp	ispE
171	secY	ispF
172	glyA	ispG
173	guaA	ispA
174	bamD	ispB
175	accD	rpsG
176	fmt	glyS
177	accA	ppa
178	bamA	glyQ
179	accC	rpsC
180	accB	rpoE
181	yqcG	rpsA
182	serS	rpsO
183	ubiX	rpsN
184	ubiH	rpsM
185	ubiG	murI
186	ubiD	rpsK
187	ubiE	pgk
188	ubiB	rpsI
189	ubiA	dfp
190	parE	pyrG
191	parC	rpsU
192	cydC	glyA
193	dnaX	lexA
194	ydfO	rpsR
195	dnaA	rpsQ
196	dnaC	rpsP
197	dnaB	dapE
198	dnaE	rplD
199	dnaG	yrfF
200	dnaN	rplO
201	prs	ubiG
202	rsgA	msbA
203	trpL	rplX
204	erpA	guaA
205	trpS	mraY
206	grpE	bamD
207	gyrB	accD
208	gyrA	fmt
209	hipB	dapF
210	rho	accA
211	topA	bamA
212	lpd	accC
213	dicA	accB
214	priB	frr
215	asnS	tyrS
216	plsC	mukF
217	plsB	fbaA
218	leuS	rplW
219	ssb	lspA
220	csrA	dut
221	tyrS	pdxH
222	lnt	suhB
223	hisS	rplU
224	thyA	mukE
225	alaS	ubiX
226	ynbG	rplR
227	lpxH	ubiE
228	lpxK	infC
229	lpxL	infB
230	lpxA	infA
231	lpxB	thyA
232	lpxC	rplK
233	lpxD	rpmH
234	rimM	ubiH
235	obgE	thiL
236	rluD	ihfA
237	rpe	mukB
238	tonB	rpmC
239	ydaE	rplQ
240	wzyE	ubiB
241	frr	rpmD
242	ydaS	lgt
243	lspA	rpmF
244	dut	parE
245	suhB	parC
246	rpmI	dnaT
247	rpmH	purB
248	rpmA	dnaX
249	rpmC	der
250	rpmB	lolD
251	rpmD	rplL
252	lgt	nusA
253	rpmF	dnaA
254	nusG	secA
255	nusB	dnaC
256	nusA	dnaB
257	hda	dnaE
258	lepB	era
259	fabZ	dnaG
260	fabD	ispU
261	fabG	fdx
262	fabA	holD
263	fabB	hemL
264	fabI	def
265	fabH	dnaN
266	yidC	lpxC
267	ybeY	mnmA
268	glnS	dxs
269	ydhL	dxr
270	pssA	tilS
271	iscU	fabZ
272	iscS	rpsH
273	fusA	fabD
274	lptD	fabG
275	lptE	fabA
276	lptF	prs
277	lptG	fabB
278	cca	fabI
279	lptA	fabH
280	lptB	serS
281	dnaT	ygfZ
282	gmk	pheS
283	mreB	rplE
284	mreC	trpL
285	mreD	ybeY
286	yjbS	rpoD
287	adk	rplF
288	psd	tsaD
289	ptsI	rplY
290	rnt	aceF
291	ygeG	eno
292	proS	erpA
293	nadE	thrS
294	nadD	glnS
295	lipA	higA
296	murI	lpxA
297	murJ	nadE
298	murA	fldA
299	murB	lepB
300	murC	lipA
301	murD	tsaB
302	murE	tsaC
303	murF	gyrB
304	murG	tsaE
305	cydA	gyrA
306	cydB	ydfO
307	tmk	mrdB
308	cydD	nrdB
309	yobI	hipB
310	dcd	valS
311	ribA	rho
312	ribC	lptE
313	ribE	coaE
314	ribD	coaD
315	ribF	lysS
316	zipA	coaA
317	pheM	ligA
318	pheS	iscU
319	pheT	rpmI
320	dapA	lptG
321	ppa	secY
322	lolA	groL
323	lexA	pgsA
324	relB	ycaR
325	yrfF	nadD
326	rplX	sucA
327	mraY	sucB
328	lolD	topA
329	mukB	fusA
330	mukF	lptD
331	mukE	groS
332	tadA	lptF
333	infC	lpd
334	infB	cca
335	infA	lptA
336	yffS	lptB
337	ihfA
338	rplO
339	rplL
340	fdx
341	msbA
342	rplY
343	aceF
344	fldA
345	cydX
346	gapA
347	pyrH
348	pyrG
349	lysS
350	pdxH
351	pgsA

## Sheet: Original results
	qseqid	sseqid	pident	length	mismatch	gapopen	qstart	qend	sstart	send	evalue	bitscore	prot length	% id	% alignment
0	accA	MTT21173.1	100000	319	0	0	1	319	1	319	0	648	319	100	100
1	accA	OLR36834.1	100000	319	0	0	1	319	1	319	0	648	319	100	100
2	accA	CDN80572.1	100000	319	0	0	1	319	1	319	0	648	319	100	100
3	accA	CDN83440.1	31818	44	30	0	145	188	177	220	1.5	29.3	319	31.818	13.7931
4	accA	OLR35577.1	37500	56	35	0	177	232	64	119	1.7	28.9	319	37.5	17.5549
5	accA	MTT20214.1	37500	56	35	0	177	232	64	119	1.8	28.9	319	37.5	17.5549
6	accA	CDN83711.1	37500	56	35	0	177	232	64	119	1.8	28.9	319	37.5	17.5549
7	accA	MTT18321.1	32558	43	26	1	19	61	62	101	3.5	26.9	319	32.558	13.4796
8	accA	OLR34869.1	32558	43	26	1	19	61	62	101	3.5	26.9	319	32.558	13.4796
9	accA	CDN82219.1	32558	43	26	1	19	61	62	101	3.5	26.9	319	32.558	13.4796
10	accA	MTT19631.1	31818	44	26	1	275	318	89	128	3.6	27.7	319	31.818	13.7931
11	accA	OLR34602.1	31818	44	26	1	275	318	89	128	3.6	27.7	319	31.818	13.7931
12	accA	CDN83357.1	31818	44	26	1	275	318	89	128	3.6	27.7	319	31.818	13.7931
13	accA	MTT18613.1	34545	55	26	3	55	106	112	159	7.8	26.6	319	34.545	17.2414
14	accA	OLR36979.1	34545	55	26	3	55	106	112	159	7.8	26.6	319	34.545	17.2414
15	accA	CDN81402.1	34545	55	26	3	55	106	112	159	7.8	26.6	319	34.545	17.2414
16	accA	MTT21234.1	26606	109	76	2	166	272	75	181	8.4	26.6	319	26.606	34.1693
17	accA	OLR36775.1	26606	109	76	2	166	272	75	181	8.4	26.6	319	26.606	34.1693
18	accA	CDN80511.1	26606	109	76	2	166	272	75	181	8.4	26.6	319	26.606	34.1693
19	accB	MTT21275.1	100000	156	0	0	1	156	1	156	2.86e-111	311	156	100	100
20	accB	OLR34706.1	100000	156	0	0	1	156	1	156	2.86e-111	311	156	100	100
21	accB	CDN83992.1	100000	156	0	0	1	156	1	156	2.86e-111	311	156	100	100
22	accB	MTT19974.1	37288	59	24	3	1	59	817	862	0.064	31.6	156	37.288	37.8205
23	accB	OLR35098.1	37288	59	24	3	1	59	817	862	0.064	31.6	156	37.288	37.8205
24	accB	CDN83522.1	37288	59	24	3	1	59	817	862	0.064	31.6	156	37.288	37.8205
25	accB	MTT22479.1	26531	49	36	0	56	104	141	189	1.8	26.9	156	26.531	31.4103
26	accB	MTT19409.1	29412	51	35	1	100	150	75	124	1.9	26.9	156	29.412	32.6923
27	accB	OLR32816.1	29412	51	35	1	100	150	75	124	1.9	26.9	156	29.412	32.6923
28	accB	CDN84264.1	29412	51	35	1	100	150	75	124	1.9	26.9	156	29.412	32.6923
29	accB	MTT21247.1	34545	55	36	0	102	156	124	178	2.9	26.6	156	34.545	35.2564
30	accB	OLR36762.1	34545	55	36	0	102	156	124	178	2.9	26.6	156	34.545	35.2564
31	accB	CDN80498.1	34545	55	36	0	102	156	124	178	2.9	26.6	156	34.545	35.2564
32	accB	MTT19973.1	37143	35	22	0	104	138	47	81	4.4	25.4	156	37.143	22.4359
33	accB	OLR35099.1	37143	35	22	0	104	138	47	81	4.4	25.4	156	37.143	22.4359
34	accB	CDN81827.1	36111	36	23	0	33	68	242	277	4.5	26.2	156	36.111	23.0769
35	accB	CDN83523.1	37143	35	22	0	104	138	48	82	4.7	25.4	156	37.143	22.4359
36	accB	MTT20070.1	56667	30	12	1	36	65	422	450	5.2	25.8	156	56.667	19.2308
37	accB	OLR37419.1	56667	30	12	1	36	65	422	450	5.2	25.8	156	56.667	19.2308
38	accB	CDN81256.1	56667	30	12	1	36	65	422	450	5.2	25.8	156	56.667	19.2308
39	accB	MTT18044.1	27586	58	30	1	30	75	104	161	5.3	25.8	156	27.586	37.1795
40	accB	OLR36374.1	27586	58	30	1	30	75	104	161	5.3	25.8	156	27.586	37.1795
41	accB	CDN85018.1	27586	58	30	1	30	75	104	161	5.3	25.8	156	27.586	37.1795
42	accC	CDN83993.1	99777	449	1	0	1	449	14	462	0	924	449	99.777	100
43	accC	MTT21274.1	99777	449	1	0	1	449	1	449	0	922	449	99.777	100
44	accC	OLR34705.1	99777	449	1	0	1	449	1	449	0	922	449	99.777	100
45	accC	MTT18898.1	25668	187	110	4	149	322	705	875	2.14e-12	67.8	449	25.668	41.6481
46	accC	MTT18898.1	24082	245	164	6	90	321	97	332	1.26e-05	46.2	449	24.082	54.5657
47	accC	OLR36670.1	25668	187	110	4	149	322	705	875	2.14e-12	67.8	449	25.668	41.6481
48	accC	OLR36670.1	24082	245	164	6	90	321	97	332	1.26e-05	46.2	449	24.082	54.5657
49	accC	CDN80402.1	25668	187	110	4	149	322	705	875	2.14e-12	67.8	449	25.668	41.6481
50	accC	CDN80402.1	24082	245	164	6	90	321	97	332	1.26e-05	46.2	449	24.082	54.5657
51	accC	MTT18834.1	24229	227	148	10	76	291	60	273	4.64e-05	43.5	449	24.229	50.5568
52	accC	OLR36732.1	24229	227	148	10	76	291	60	273	4.64e-05	43.5	449	24.229	50.5568
53	accC	CDN80468.1	24229	227	148	10	76	291	60	273	4.64e-05	43.5	449	24.229	50.5568
54	accC	MTT18191.1	21667	180	123	5	4	181	14	177	0.13	33.1	449	21.667	40.0891
55	accC	OLR35001.1	21667	180	123	5	4	181	14	177	0.13	33.1	449	21.667	40.0891
56	accC	CDN82352.1	21667	180	123	5	4	181	14	177	0.13	33.1	449	21.667	40.0891
57	accC	MTT21449.1	25385	130	78	5	214	340	630	743	0.21	32.7	449	25.385	28.9532
58	accC	OLR37568.1	25385	130	78	5	214	340	630	743	0.21	32.7	449	25.385	28.9532
59	accC	CDN81100.1	25385	130	78	5	214	340	630	743	0.21	32.7	449	25.385	28.9532
60	accC	MTT21921.1	22222	180	106	6	98	259	87	250	0.43	31.6	449	22.222	40.0891
61	accC	OLR30018.1	22222	180	106	6	98	259	87	250	0.43	31.6	449	22.222	40.0891
62	accC	CDN84843.1	22222	180	106	6	98	259	87	250	0.43	31.6	449	22.222	40.0891
63	accC	MTT18265.1	37255	51	32	0	4	54	171	221	5.8	27.7	449	37.255	11.3586
64	accC	OLR34928.1	37255	51	32	0	4	54	171	221	5.8	27.7	449	37.255	11.3586
65	accC	CDN82278.1	37255	51	32	0	4	54	171	221	5.8	27.7	449	37.255	11.3586
66	accD	CDN82993.1	100000	304	0	0	1	304	29	332	0	622	304	100	100
67	accD	MTT17810.1	100000	304	0	0	1	304	1	304	0	622	304	100	100
68	accD	OLR36188.1	100000	304	0	0	1	304	1	304	0	622	304	100	100
69	accD	MTT19927.1	39216	51	27	1	243	289	17	67	0.46	30	304	39.216	16.7763
70	accD	OLR35143.1	39216	51	27	1	243	289	17	67	0.46	30	304	39.216	16.7763
71	accD	CDN83570.1	39216	51	27	1	243	289	41	91	0.69	29.6	304	39.216	16.7763
72	accD	MTT17853.1	30263	76	42	2	175	245	340	409	2.7	28.1	304	30.263	25
73	accD	OLR30449.1	30263	76	42	2	175	245	340	409	2.7	28.1	304	30.263	25
74	accD	CDN83038.1	30263	76	42	2	175	245	340	409	2.7	28.1	304	30.263	25
75	accD	MTT20608.1	26667	60	31	1	193	252	82	128	6.2	26.9	304	26.667	19.7368
76	accD	OLR34372.1	26667	60	31	1	193	252	82	128	6.2	26.9	304	26.667	19.7368
77	accD	CDN84715.1	26667	60	31	1	193	252	82	128	6.2	26.9	304	26.667	19.7368
78	accD	MTT18841.1	28814	59	41	1	141	198	272	330	6.9	26.9	304	28.814	19.4079
79	accD	OLR36725.1	28814	59	41	1	141	198	272	330	6.9	26.9	304	28.814	19.4079
80	accD	CDN80461.1	28814	59	41	1	141	198	272	330	6.9	26.9	304	28.814	19.4079
81	aceF	MTT21247.1	99841	630	1	0	1	630	1	630	0	1236	630	99.841	100
82	aceF	OLR36762.1	99841	630	1	0	1	630	1	630	0	1236	630	99.841	100
83	aceF	CDN80498.1	99841	630	1	0	1	630	1	630	0	1236	630	99.841	100
84	aceF	MTT21454.1	31281	406	249	9	227	630	26	403	2.98e-48	172	630	31.281	64.4444
85	aceF	MTT21454.1	27358	106	75	1	107	210	5	110	0.051	35	630	27.358	16.8254
86	aceF	MTT21454.1	24545	110	80	2	2	109	3	111	0.81	31.2	630	24.545	17.4603
87	aceF	OLR37572.1	31281	406	249	9	227	630	26	403	2.98e-48	172	630	31.281	64.4444
88	aceF	OLR37572.1	27358	106	75	1	107	210	5	110	0.051	35	630	27.358	16.8254
89	aceF	OLR37572.1	24545	110	80	2	2	109	3	111	0.81	31.2	630	24.545	17.4603
90	aceF	CDN81095.1	31281	406	249	9	227	630	26	403	2.98e-48	172	630	31.281	64.4444
91	aceF	CDN81095.1	27358	106	75	1	107	210	5	110	0.051	35	630	27.358	16.8254
92	aceF	CDN81095.1	24545	110	80	2	2	109	3	111	0.81	31.2	630	24.545	17.4603
93	aceF	MTT17941.1	29557	406	233	8	229	630	26	382	7.65e-43	157	630	29.557	64.4444
94	aceF	MTT17941.1	29577	71	48	1	3	71	2	72	0.096	33.9	630	29.577	11.2698
95	aceF	MTT17941.1	31915	47	32	0	128	174	26	72	0.24	32.7	630	31.915	7.46032
96	aceF	OLR36474.1	29557	406	233	8	229	630	26	382	7.65e-43	157	630	29.557	64.4444
97	aceF	OLR36474.1	29577	71	48	1	3	71	2	72	0.096	33.9	630	29.577	11.2698
98	aceF	OLR36474.1	31915	47	32	0	128	174	26	72	0.24	32.7	630	31.915	7.46032
99	aceF	CDN84907.1	29557	406	233	8	229	630	26	382	7.65e-43	157	630	29.557	64.4444
100	aceF	CDN84907.1	29577	71	48	1	3	71	2	72	0.096	33.9	630	29.577	11.2698
101	aceF	CDN84907.1	31915	47	32	0	128	174	26	72	0.24	32.7	630	31.915	7.46032
102	aceF	MTT18391.1	26000	150	92	4	130	272	39	176	0.002	38.9	630	26	23.8095
103	aceF	OLR34499.1	26000	150	92	4	130	272	39	176	0.002	38.9	630	26	23.8095
104	aceF	CDN82148.1	26000	150	92	4	130	272	53	190	0.003	38.9	630	26	23.8095
105	aceF	MTT21275.1	34545	55	36	0	124	178	102	156	3.3	28.5	630	34.545	8.73016
106	aceF	OLR34706.1	34545	55	36	0	124	178	102	156	3.3	28.5	630	34.545	8.73016
107	aceF	CDN83992.1	34545	55	36	0	124	178	102	156	3.3	28.5	630	34.545	8.73016
108	aceF	MTT18458.1	40741	27	16	0	347	373	19	45	8.2	25.8	630	40.741	4.28571
109	aceF	OLR34435.1	40741	27	16	0	347	373	19	45	8.2	25.8	630	40.741	4.28571
110	aceF	CDN82076.1	40741	27	16	0	347	373	19	45	8.2	25.8	630	40.741	4.28571
111	acpP	MTT18755.1	100000	78	0	0	1	78	1	78	1.13e-51	154	78	100	100
112	acpP	OLR37117.1	100000	78	0	0	1	78	1	78	1.13e-51	154	78	100	100
113	acpP	CDN81551.1	100000	78	0	0	1	78	1	78	1.13e-51	154	78	100	100
114	acpP	CDN83716.1	42857	35	20	0	22	56	24	58	4.19e-05	36.6	78	42.857	44.8718
115	acpP	MTT20219.1	40000	35	21	0	22	56	24	58	0.000314	34.7	78	40	44.8718
116	acpP	OLR35582.1	40000	35	21	0	22	56	24	58	0.000314	34.7	78	40	44.8718
117	acpP	MTT20268.1	37500	40	19	1	9	42	171	210	7.4	23.5	78	37.5	51.2821
118	acpP	OLR35632.1	37500	40	19	1	9	42	171	210	7.4	23.5	78	37.5	51.2821
119	acpP	CDN83766.1	37500	40	19	1	9	42	171	210	7.4	23.5	78	37.5	51.2821
120	acpP	MTT22343.1	30000	50	33	1	4	51	54	103	9.5	23.1	78	30	64.1026
121	acpS	MTT19438.1	97619	126	3	0	1	126	1	126	3.32e-88	250	126	97.619	100
122	acpS	OLR35489.1	97619	126	3	0	1	126	1	126	3.32e-88	250	126	97.619	100
123	acpS	CDN83206.1	97619	126	3	0	1	126	1	126	3.32e-88	250	126	97.619	100
124	acpS	MTT18760.1	24615	65	49	0	49	113	205	269	5.4	25	126	24.615	51.5873
125	acpS	OLR37122.1	24615	65	49	0	49	113	205	269	5.4	25	126	24.615	51.5873
126	acpS	CDN81556.1	24615	65	49	0	49	113	205	269	5.4	25	126	24.615	51.5873
127	acpS	MTT18043.1	52174	23	11	0	93	115	8	30	6.9	24.6	126	52.174	18.254
128	acpS	OLR36375.1	52174	23	11	0	93	115	8	30	6.9	24.6	126	52.174	18.254
129	acpS	CDN85017.1	52174	23	11	0	93	115	16	38	7.3	24.6	126	52.174	18.254
130	adk	CDN80864.1	100000	214	0	0	1	214	21	234	5.56e-158	434	214	100	100
131	adk	MTT19053.1	100000	214	0	0	1	214	1	214	1.56e-157	432	214	100	100
132	adk	OLR37793.1	100000	214	0	0	1	214	1	214	1.56e-157	432	214	100	100
133	adk	OLR32102.1	40426	47	25	1	2	45	4	50	0.014	33.9	214	40.426	21.9626
134	adk	MTT21713.1	28395	81	52	2	45	119	24	104	0.07	31.6	214	28.395	37.8505
135	adk	OLR34808.1	28395	81	52	2	45	119	24	104	0.07	31.6	214	28.395	37.8505
136	adk	CDN83884.1	28395	81	52	2	45	119	24	104	0.07	31.6	214	28.395	37.8505
137	adk	MTT20531.1	29114	79	44	2	4	70	596	674	0.94	28.9	214	29.114	36.9159
138	adk	OLR34293.1	29114	79	44	2	4	70	596	674	0.94	28.9	214	29.114	36.9159
139	adk	CDN84801.1	29114	79	44	2	4	70	596	674	0.94	28.9	214	29.114	36.9159
140	adk	MTT22087.1	31429	70	38	3	3	63	101	169	2.2	27.3	214	31.429	32.7103
141	adk	MTT20068.1	29688	64	41	2	3	63	53	115	3.4	26.9	214	29.688	29.9065
142	adk	OLR37417.1	29688	64	41	2	3	63	53	115	3.4	26.9	214	29.688	29.9065
143	adk	CDN81258.1	29688	64	41	2	3	63	53	115	3.4	26.9	214	29.688	29.9065
144	adk	MTT20516.1	38710	31	19	0	151	181	129	159	5.7	26.2	214	38.71	14.486
145	adk	OLR34268.1	38710	31	19	0	151	181	129	159	5.7	26.2	214	38.71	14.486
146	adk	CDN82529.1	38710	31	19	0	151	181	129	159	5.7	26.2	214	38.71	14.486
147	alaS	MTT19691.1	99429	876	5	0	1	876	1	876	0	1796	876	99.429	100
148	alaS	OLR34546.1	99429	876	5	0	1	876	1	876	0	1796	876	99.429	100
149	alaS	CDN83296.1	99429	876	5	0	1	876	1	876	0	1796	876	99.429	100
150	alaS	MTT21464.1	25385	130	62	4	603	703	151	274	2.3	30	876	25.385	14.8402
151	alaS	OLR37582.1	25385	130	62	4	603	703	151	274	2.3	30	876	25.385	14.8402
152	alaS	CDN81084.1	25385	130	62	4	603	703	151	274	2.3	30	876	25.385	14.8402
153	alaS	MTT21060.1	34694	49	16	3	137	172	209	254	2.7	30	876	34.694	5.59361
154	alaS	OLR35974.1	34694	49	16	3	137	172	209	254	2.7	30	876	34.694	5.59361
155	alaS	CDN84579.1	34694	49	16	3	137	172	217	262	2.7	30	876	34.694	5.59361
156	alaS	MTT19482.1	39474	38	20	1	224	258	289	326	7	28.5	876	39.474	4.3379
157	alaS	OLR35446.1	39474	38	20	1	224	258	289	326	7	28.5	876	39.474	4.3379
158	alaS	CDN83161.1	39474	38	20	1	224	258	289	326	7	28.5	876	39.474	4.3379
159	argS	MTT20374.1	99827	577	1	0	1	577	1	577	0	1194	577	99.827	100
160	argS	OLR30151.1	99827	577	1	0	1	577	1	577	0	1194	577	99.827	100
161	argS	CDN82383.1	99827	577	1	0	1	577	1	577	0	1194	577	99.827	100
162	argS	MTT20715.1	35294	34	22	0	122	155	42	75	1.4	30.4	577	35.294	5.89255
163	argS	OLR37650.1	35294	34	22	0	122	155	42	75	1.4	30.4	577	35.294	5.89255
164	argS	CDN81014.1	35294	34	22	0	122	155	89	122	1.5	30.4	577	35.294	5.89255
165	argS	MTT21912.1	36364	33	21	0	129	161	37	69	2.2	29.6	577	36.364	5.71924
166	argS	OLR37742.1	36364	33	21	0	129	161	37	69	2.2	29.6	577	36.364	5.71924
167	argS	CDN80918.1	36364	33	21	0	129	161	37	69	2.2	29.6	577	36.364	5.71924
168	argS	CDN84982.1	25862	116	74	4	250	362	260	366	3.8	28.9	577	25.862	20.104
169	argS	MTT18014.1	25862	116	74	4	250	362	257	363	3.8	28.9	577	25.862	20.104
170	argS	OLR36536.1	25862	116	74	4	250	362	257	363	3.8	28.9	577	25.862	20.104
171	argS	MTT19455.1	23529	85	61	1	296	376	165	249	4.9	28.5	577	23.529	14.7314
172	argS	OLR35472.1	23529	85	61	1	296	376	165	249	4.9	28.5	577	23.529	14.7314
173	argS	CDN83190.1	23529	85	61	1	296	376	165	249	4.9	28.5	577	23.529	14.7314
174	argS	MTT20182.1	27692	65	47	0	425	489	237	301	6.5	28.1	577	27.692	11.2652
175	argS	OLR37528.1	27692	65	47	0	425	489	237	301	6.5	28.1	577	27.692	11.2652
176	argS	CDN81142.1	27692	65	47	0	425	489	237	301	6.5	28.1	577	27.692	11.2652
177	argS	MTT18077.1	27397	73	51	2	30	101	504	575	8.7	27.7	577	27.397	12.6516
178	argS	OLR36343.1	27397	73	51	2	30	101	504	575	8.7	27.7	577	27.397	12.6516
179	argS	CDN85050.1	27397	73	51	2	30	101	505	576	8.8	27.7	577	27.397	12.6516
180	asd	CDN84172.1	99728	367	1	0	1	367	21	387	0	753	367	99.728	100
181	asd	MTT19324.1	99728	367	1	0	1	367	1	367	0	752	367	99.728	100
182	asd	OLR33622.1	99728	367	1	0	1	367	1	367	0	752	367	99.728	100
183	asd	MTT17813.1	22129	357	234	11	3	356	6	321	3.5e-05	43.9	367	22.129	97.2752
184	asd	OLR36191.1	22129	357	234	11	3	356	6	321	3.5e-05	43.9	367	22.129	97.2752
185	asd	CDN82996.1	22129	357	234	11	3	356	6	321	3.5e-05	43.9	367	22.129	97.2752
186	asd	CDN82409.1	29091	55	37	1	134	188	16	68	0.44	30.4	367	29.091	14.9864
187	asd	MTT20399.1	29091	55	37	1	134	188	11	63	0.45	30	367	29.091	14.9864
188	asd	OLR34155.1	29091	55	37	1	134	188	11	63	0.45	30	367	29.091	14.9864
189	asd	CDN83542.1	37255	51	20	2	216	259	127	172	4.7	27.7	367	37.255	13.8965
190	asd	MTT19954.1	37255	51	20	2	216	259	99	144	5.2	27.3	367	37.255	13.8965
191	asd	OLR35114.1	37255	51	20	2	216	259	99	144	5.2	27.3	367	37.255	13.8965
192	asd	MTT19279.1	25000	112	62	4	141	235	99	205	9.4	26.6	367	25	30.5177
193	asd	OLR33666.1	25000	112	62	4	141	235	99	205	9.4	26.6	367	25	30.5177
194	asd	CDN84125.1	25000	112	62	4	141	235	99	205	9.4	26.6	367	25	30.5177
195	asd	MTT20038.1	27586	87	53	3	131	215	129	207	9.9	26.9	367	27.586	23.7057
196	asd	OLR35034.1	27586	87	53	3	131	215	129	207	9.9	26.9	367	27.586	23.7057
197	asd	CDN83458.1	27586	87	53	3	131	215	132	210	10	26.9	367	27.586	23.7057
198	asnS	MTT18614.1	99785	466	1	0	1	466	1	466	0	962	466	99.785	100
199	asnS	OLR36980.1	99785	466	1	0	1	466	1	466	0	962	466	99.785	100
200	asnS	CDN81403.1	99785	466	1	0	1	466	1	466	0	962	466	99.785	100
201	asnS	MTT18038.1	22899	476	296	21	15	458	63	499	6.43e-13	68.9	466	22.899	102.146
202	asnS	OLR36380.1	22899	476	296	21	15	458	63	499	6.43e-13	68.9	466	22.899	102.146
203	asnS	CDN85012.1	22899	476	296	21	15	458	72	508	6.97e-13	68.9	466	22.899	102.146
204	asnS	MTT19986.1	21398	472	308	18	15	458	63	499	3.15e-11	63.9	466	21.398	101.288
205	asnS	OLR35087.1	21398	472	308	18	15	458	63	499	3.15e-11	63.9	466	21.398	101.288
206	asnS	CDN83510.1	21398	472	308	18	15	458	63	499	3.15e-11	63.9	466	21.398	101.288
207	asnS	MTT20364.1	33333	111	69	2	360	466	454	563	4.19e-11	63.5	466	33.333	23.8197
208	asnS	MTT20364.1	22939	279	165	11	16	277	14	259	2.97e-06	48.1	466	22.939	59.8712
209	asnS	OLR30142.1	33333	111	69	2	360	466	454	563	4.19e-11	63.5	466	33.333	23.8197
210	asnS	OLR30142.1	22939	279	165	11	16	277	14	259	2.97e-06	48.1	466	22.939	59.8712
211	asnS	CDN82373.1	33333	111	69	2	360	466	454	563	4.19e-11	63.5	466	33.333	23.8197
212	asnS	CDN82373.1	22939	279	165	11	16	277	14	259	2.97e-06	48.1	466	22.939	59.8712
213	asnS	MTT18604.1	29070	86	45	4	5	83	57	133	2.1	28.9	466	29.07	18.4549
214	asnS	OLR36970.1	29070	86	45	4	5	83	57	133	2.1	28.9	466	29.07	18.4549
215	asnS	CDN81393.1	29070	86	45	4	5	83	57	133	2.1	28.9	466	29.07	18.4549
216	asnS	MTT22378.1	27660	47	33	1	103	148	10	56	3.9	27.3	466	27.66	10.0858
217	asnS	MTT22502.1	27660	47	33	1	103	148	10	56	4.4	26.9	466	27.66	10.0858
218	asnS	MTT21373.1	54545	22	10	0	159	180	157	178	6	27.3	466	54.545	4.72103
219	asnS	OLR33557.1	54545	22	10	0	159	180	157	178	6	27.3	466	54.545	4.72103
220	asnS	CDN82714.1	54545	22	10	0	159	180	157	178	6	27.3	466	54.545	4.72103
221	asnS	MTT22169.1	27660	47	33	1	103	148	10	56	7.1	26.9	466	27.66	10.0858
222	aspS	MTT20364.1	99322	590	4	0	1	590	1	590	0	1210	590	99.322	100
223	aspS	OLR30142.1	99322	590	4	0	1	590	1	590	0	1210	590	99.322	100
224	aspS	CDN82373.1	99322	590	4	0	1	590	1	590	0	1210	590	99.322	100
225	aspS	MTT19986.1	28289	304	183	12	11	298	61	345	6.61e-21	94.7	590	28.289	51.5254
226	aspS	MTT19986.1	26531	147	103	3	413	555	354	499	5.49e-09	57.4	590	26.531	24.9153
227	aspS	OLR35087.1	28289	304	183	12	11	298	61	345	6.61e-21	94.7	590	28.289	51.5254
228	aspS	OLR35087.1	26531	147	103	3	413	555	354	499	5.49e-09	57.4	590	26.531	24.9153
229	aspS	CDN83510.1	28289	304	183	12	11	298	61	345	6.61e-21	94.7	590	28.289	51.5254
230	aspS	CDN83510.1	26531	147	103	3	413	555	354	499	5.49e-09	57.4	590	26.531	24.9153
231	aspS	CDN85012.1	26403	303	190	10	11	298	70	354	1.05e-19	90.9	590	26.403	51.3559
232	aspS	CDN85012.1	27703	148	100	3	413	555	363	508	8.8e-10	59.7	590	27.703	25.0847
233	aspS	MTT18038.1	26403	303	190	10	11	298	61	345	1.17e-19	90.9	590	26.403	51.3559
234	aspS	MTT18038.1	27703	148	100	3	413	555	354	499	7.75e-10	60.1	590	27.703	25.0847
235	aspS	OLR36380.1	26403	303	190	10	11	298	61	345	1.17e-19	90.9	590	26.403	51.3559
236	aspS	OLR36380.1	27703	148	100	3	413	555	354	499	7.75e-10	60.1	590	27.703	25.0847
237	aspS	MTT18614.1	33333	111	69	2	454	563	360	466	5.59e-11	63.5	590	33.333	18.8136
238	aspS	MTT18614.1	22581	279	166	11	14	259	16	277	1.09e-05	46.6	590	22.581	47.2881
239	aspS	OLR36980.1	33333	111	69	2	454	563	360	466	5.59e-11	63.5	590	33.333	18.8136
240	aspS	OLR36980.1	22581	279	166	11	14	259	16	277	1.09e-05	46.6	590	22.581	47.2881
241	aspS	CDN81403.1	33333	111	69	2	454	563	360	466	5.59e-11	63.5	590	33.333	18.8136
242	aspS	CDN81403.1	22581	279	166	11	14	259	16	277	1.09e-05	46.6	590	22.581	47.2881
243	aspS	MTT18065.1	31068	103	62	2	138	233	16	116	7.89e-08	52.8	590	31.068	17.4576
244	aspS	MTT18065.1	30208	96	55	2	467	554	229	320	2.97e-05	45.1	590	30.208	16.2712
245	aspS	OLR36353.1	31068	103	62	2	138	233	16	116	7.89e-08	52.8	590	31.068	17.4576
246	aspS	OLR36353.1	30208	96	55	2	467	554	229	320	2.97e-05	45.1	590	30.208	16.2712
247	aspS	CDN85039.1	31068	103	62	2	138	233	16	116	7.89e-08	52.8	590	31.068	17.4576
248	aspS	CDN85039.1	30208	96	55	2	467	554	229	320	2.97e-05	45.1	590	30.208	16.2712
249	aspS	MTT18018.1	27273	88	57	3	135	217	113	198	1.3	30	590	27.273	14.9153
250	aspS	OLR36400.1	27273	88	57	3	135	217	113	198	1.3	30	590	27.273	14.9153
251	aspS	CDN84986.1	27273	88	57	3	135	217	113	198	1.3	30	590	27.273	14.9153
252	aspS	MTT21883.1	31959	97	44	4	278	367	51	132	2.5	29.3	590	31.959	16.4407
253	aspS	OLR30504.1	31959	97	44	4	278	367	51	132	2.5	29.3	590	31.959	16.4407
254	aspS	CDN85245.1	31959	97	44	4	278	367	51	132	2.5	29.3	590	31.959	16.4407
255	aspS	MTT22156.1	36170	47	21	1	154	200	64	101	6.4	28.1	590	36.17	7.9661
256	bamA	MTT21181.1	100000	810	0	0	1	810	1	810	0	1664	810	100	100
257	bamA	OLR36826.1	100000	810	0	0	1	810	1	810	0	1664	810	100	100
258	bamA	CDN80564.1	100000	810	0	0	1	810	1	810	0	1664	810	100	100
259	bamA	MTT18134.1	20782	486	274	21	339	807	181	572	0.11	34.3	810	20.782	60
260	bamA	OLR36287.1	20782	486	274	21	339	807	181	572	0.11	34.3	810	20.782	60
261	bamA	CDN85107.1	20782	486	274	21	339	807	181	572	0.11	34.3	810	20.782	60
262	bamA	MTT21321.1	32292	96	45	6	200	284	88	174	1.3	30	810	32.292	11.8519
263	bamA	OLR34750.1	32292	96	45	6	200	284	88	174	1.3	30	810	32.292	11.8519
264	bamA	CDN83943.1	32292	96	45	6	200	284	88	174	1.3	30	810	32.292	11.8519
265	bamA	MTT20460.1	33333	54	34	1	171	222	57	110	2.9	30	810	33.333	6.66667
266	bamA	OLR34215.1	33333	54	34	1	171	222	57	110	2.9	30	810	33.333	6.66667
267	bamA	CDN82473.1	33333	54	34	1	171	222	57	110	2.9	30	810	33.333	6.66667
268	bamD	MTT19749.1	100000	245	0	0	1	245	1	245	0	507	245	100	100
269	bamD	OLR31787.1	100000	245	0	0	1	245	1	245	0	507	245	100	100
270	bamD	CDN83235.1	100000	245	0	0	1	245	1	245	0	507	245	100	100
271	bamD	CDN81563.1	42857	28	16	0	1	28	2	29	0.21	30.8	245	42.857	11.4286
272	bamD	MTT18766.1	42857	28	16	0	1	28	1	28	0.21	30.8	245	42.857	11.4286
273	bamD	OLR37128.1	42857	28	16	0	1	28	1	28	0.21	30.8	245	42.857	11.4286
274	bamD	MTT20376.1	26000	50	37	0	69	118	275	324	1.1	28.9	245	26	20.4082
275	bamD	OLR30153.1	26000	50	37	0	69	118	275	324	1.1	28.9	245	26	20.4082
276	bamD	CDN82385.1	26000	50	37	0	69	118	275	324	1.1	28.9	245	26	20.4082
277	bamD	CDN84387.1	33333	45	30	0	74	118	208	252	2.8	27.3	245	33.333	18.3673
278	bamD	MTT19866.1	33333	45	30	0	74	118	205	249	2.9	27.3	245	33.333	18.3673
279	bamD	OLR35858.1	33333	45	30	0	74	118	205	249	2.9	27.3	245	33.333	18.3673
280	bamD	MTT22034.1	26786	56	31	2	29	74	61	116	3.3	27.3	245	26.786	22.8571
281	bamD	OLR37181.1	26786	56	31	2	29	74	61	116	3.3	27.3	245	26.786	22.8571
282	bamD	CDN81619.1	26786	56	31	2	29	74	61	116	3.3	27.3	245	26.786	22.8571
283	bamD	MTT20108.1	55000	20	9	0	171	190	186	205	3.9	26.9	245	55	8.16327
284	bamD	OLR37455.1	55000	20	9	0	171	190	186	205	3.9	26.9	245	55	8.16327
285	bamD	CDN81217.1	55000	20	9	0	171	190	186	205	3.9	26.9	245	55	8.16327
286	bamD	MTT18052.1	43478	23	13	0	3	25	2	24	9.9	25	245	43.478	9.38776
287	bamD	OLR36366.1	43478	23	13	0	3	25	2	24	9.9	25	245	43.478	9.38776
288	birA	MTT22326.1	98442	321	5	0	1	321	1	321	0	636	321	98.442	100
289	birA	OLR28407.1	98442	321	5	0	1	321	1	321	0	636	321	98.442	100
290	birA	CDN84816.1	98442	321	5	0	1	321	1	321	0	636	321	98.442	100
291	birA	MTT20748.1	32500	40	22	1	54	88	55	94	0.88	28.5	321	32.5	12.4611
292	birA	OLR37307.1	32500	40	22	1	54	88	55	94	0.88	28.5	321	32.5	12.4611
293	birA	CDN81759.1	32500	40	22	1	54	88	55	94	0.88	28.5	321	32.5	12.4611
294	birA	MTT21051.1	31148	61	26	2	9	63	21	71	3.4	27.7	321	31.148	19.0031
295	birA	OLR35731.1	31148	61	26	2	9	63	21	71	3.4	27.7	321	31.148	19.0031
296	birA	CDN84588.1	31148	61	26	2	9	63	21	71	3.4	27.7	321	31.148	19.0031
297	can	MTT21236.1	100000	220	0	0	1	220	1	220	5.31e-167	457	220	100	100
298	can	OLR36773.1	100000	220	0	0	1	220	1	220	5.31e-167	457	220	100	100
299	can	CDN80509.1	100000	220	0	0	1	220	1	220	5.31e-167	457	220	100	100
300	can	MTT20239.1	31081	74	39	3	1	73	19	81	2.7	27.3	220	31.081	33.6364
301	can	OLR35601.1	31081	74	39	3	1	73	19	81	2.7	27.3	220	31.081	33.6364
302	can	CDN83736.1	31081	74	39	3	1	73	19	81	2.7	27.3	220	31.081	33.6364
303	can	MTT21017.1	33333	36	21	1	25	57	282	317	3.6	27.3	220	33.333	16.3636
304	can	OLR34072.1	33333	36	21	1	25	57	282	317	3.6	27.3	220	33.333	16.3636
305	can	CDN84620.1	33333	36	21	1	25	57	282	317	3.6	27.3	220	33.333	16.3636
306	cca	MTT20307.1	98786	412	5	0	1	412	1	412	0	839	412	98.786	100
307	cca	OLR35673.1	98786	412	5	0	1	412	1	412	0	839	412	98.786	100
308	cca	CDN83807.1	98786	412	5	0	1	412	1	412	0	839	412	98.786	100
309	cca	OLR36791.1	27864	323	192	12	4	299	52	360	2.57e-15	75.9	412	27.864	78.3981
310	cca	MTT21218.1	27864	323	192	12	4	299	70	378	2.84e-15	75.9	412	27.864	78.3981
311	cca	CDN80527.1	27864	323	192	12	4	299	70	378	2.84e-15	75.9	412	27.864	78.3981
312	cca	MTT19933.1	43902	41	15	2	106	145	248	281	0.44	31.2	412	43.902	9.95146
313	cca	OLR35137.1	43902	41	15	2	106	145	248	281	0.44	31.2	412	43.902	9.95146
314	cca	CDN83564.1	43902	41	15	2	106	145	252	285	0.47	31.2	412	43.902	9.95146
315	cca	MTT21262.1	36842	38	24	0	229	266	4	41	3.2	28.5	412	36.842	9.2233
316	cca	OLR34694.1	36842	38	24	0	229	266	4	41	3.2	28.5	412	36.842	9.2233
317	cca	CDN84005.1	36842	38	24	0	229	266	4	41	3.2	28.5	412	36.842	9.2233
318	cca	MTT19697.1	31429	70	40	2	201	262	12	81	4.1	28.1	412	31.429	16.9903
319	cca	OLR31836.1	31429	70	40	2	201	262	12	81	4.1	28.1	412	31.429	16.9903
320	cca	CDN83289.1	31429	70	40	2	201	262	12	81	4.1	28.1	412	31.429	16.9903
321	cdsA	MTT21183.1	98947	285	3	0	1	285	1	285	0	558	285	98.947	100
322	cdsA	OLR36824.1	98947	285	3	0	1	285	1	285	0	558	285	98.947	100
323	cdsA	CDN80562.1	98947	285	3	0	1	285	1	285	0	558	285	98.947	100
324	cdsA	CDN85475.1	32857	70	39	2	44	106	177	245	0.6	30	285	32.857	24.5614
325	cdsA	MTT22234.1	32857	70	39	2	44	106	152	220	0.64	30	285	32.857	24.5614
326	cdsA	CDN82785.1	22481	258	151	15	28	260	433	666	1.1	29.3	285	22.481	90.5263
327	cdsA	MTT17611.1	22481	258	151	15	28	260	428	661	1.3	29.3	285	22.481	90.5263
328	cdsA	OLR35985.1	22481	258	151	15	28	260	428	661	1.3	29.3	285	22.481	90.5263
329	cdsA	CDN84015.1	24719	89	55	2	118	206	102	178	6.8	26.6	285	24.719	31.2281
330	cdsA	MTT21252.1	24719	89	55	2	118	206	101	177	6.8	26.6	285	24.719	31.2281
331	cdsA	OLR34683.1	24719	89	55	2	118	206	101	177	6.8	26.6	285	24.719	31.2281
332	coaA	MTT22325.1	100000	316	0	0	1	316	1	316	0	652	316	100	100
333	coaA	OLR28406.1	100000	316	0	0	1	316	3	318	0	652	316	100	100
334	coaA	CDN84817.1	100000	316	0	0	1	316	8	323	0	652	316	100	100
335	coaA	MTT19946.1	25490	204	127	5	42	245	12	190	1.47e-09	55.8	316	25.49	64.557
336	coaA	OLR35122.1	25490	204	127	5	42	245	12	190	1.47e-09	55.8	316	25.49	64.557
337	coaA	CDN83550.1	25490	204	127	5	42	245	12	190	1.47e-09	55.8	316	25.49	64.557
338	coaA	MTT21401.1	26667	180	114	6	90	267	10	173	2.97e-05	42.7	316	26.667	56.962
339	coaA	OLR33585.1	26667	180	114	6	90	267	10	173	2.97e-05	42.7	316	26.667	56.962
340	coaA	CDN82743.1	26667	180	114	6	90	267	31	194	3.01e-05	43.1	316	26.667	56.962
341	coaA	MTT21490.1	27451	51	37	0	5	55	390	440	0.97	29.6	316	27.451	16.1392
342	coaA	OLR37606.1	27451	51	37	0	5	55	390	440	0.97	29.6	316	27.451	16.1392
343	coaA	CDN81059.1	27451	51	37	0	5	55	407	457	1	29.6	316	27.451	16.1392
344	coaA	MTT18225.1	27083	48	35	0	249	296	278	325	2.7	28.1	316	27.083	15.1899
345	coaA	OLR34966.1	27083	48	35	0	249	296	278	325	2.7	28.1	316	27.083	15.1899
346	coaA	CDN82317.1	27083	48	35	0	249	296	278	325	2.7	28.1	316	27.083	15.1899
347	coaA	MTT18784.1	25217	115	77	3	59	172	102	208	3	28.1	316	25.217	36.3924
348	coaA	OLR37144.1	25217	115	77	3	59	172	102	208	3	28.1	316	25.217	36.3924
349	coaA	CDN81581.1	25217	115	77	3	59	172	102	208	3	28.1	316	25.217	36.3924
350	coaA	MTT21775.1	25000	68	45	2	197	258	40	107	3.4	26.9	316	25	21.519
351	coaA	MTT21081.1	30769	39	27	0	90	128	38	76	8.4	26.6	316	30.769	12.3418
352	coaA	OLR35758.1	30769	39	27	0	90	128	38	76	8.4	26.6	316	30.769	12.3418
353	coaA	CDN84558.1	30769	39	27	0	90	128	38	76	8.4	26.6	316	30.769	12.3418
354	coaD	MTT19870.1	98113	159	3	0	1	159	1	159	6.42e-116	323	159	98.113	100
355	coaD	OLR35854.1	98113	159	3	0	1	159	1	159	6.42e-116	323	159	98.113	100
356	coaD	CDN84392.1	98113	159	3	0	1	159	1	159	6.42e-116	323	159	98.113	100
357	coaD	MTT21951.1	24771	109	75	3	3	105	2	109	0.000144	38.1	159	24.771	68.5535
358	coaD	MTT21606.1	23077	104	67	3	3	97	2	101	0.1	30.4	159	23.077	65.4088
359	coaD	OLR38013.1	23077	104	67	3	3	97	2	101	0.1	30.4	159	23.077	65.4088
360	coaD	CDN80626.1	23077	104	67	3	3	97	2	101	0.1	30.4	159	23.077	65.4088
361	coaD	MTT20712.1	22660	203	96	8	4	150	5	202	0.13	30.4	159	22.66	127.673
362	coaD	OLR37653.1	22660	203	96	8	4	150	5	202	0.13	30.4	159	22.66	127.673
363	coaD	CDN81011.1	22660	203	96	8	4	150	5	202	0.13	30.4	159	22.66	127.673
364	coaD	MTT18945.1	32075	53	30	2	9	59	71	119	0.7	28.5	159	32.075	33.3333
365	coaD	OLR36623.1	32075	53	30	2	9	59	71	119	0.7	28.5	159	32.075	33.3333
366	coaD	CDN85337.1	32075	53	30	2	9	59	78	126	0.72	28.5	159	32.075	33.3333
367	coaD	MTT21507.1	48485	33	15	1	126	156	103	135	0.83	27.7	159	48.485	20.7547
368	coaD	OLR37623.1	48485	33	15	1	126	156	103	135	0.83	27.7	159	48.485	20.7547
369	coaD	CDN81043.1	48485	33	15	1	126	156	103	135	0.83	27.7	159	48.485	20.7547
370	coaD	MTT20303.1	28070	57	34	1	2	51	340	396	0.97	28.1	159	28.07	35.8491
371	coaD	OLR35669.1	28070	57	34	1	2	51	340	396	0.97	28.1	159	28.07	35.8491
372	coaD	CDN83802.1	28070	57	34	1	2	51	340	396	0.97	28.1	159	28.07	35.8491
373	coaD	MTT20693.1	23529	102	74	2	12	113	155	252	1.2	27.7	159	23.529	64.1509
374	coaD	OLR37672.1	23529	102	74	2	12	113	155	252	1.2	27.7	159	23.529	64.1509
375	coaD	CDN80990.1	23529	102	74	2	12	113	184	281	1.3	27.7	159	23.529	64.1509
376	coaD	MTT18040.1	25000	92	61	2	65	154	525	610	7.1	25.4	159	25	57.8616
377	coaD	OLR36378.1	25000	92	61	2	65	154	525	610	7.1	25.4	159	25	57.8616
378	coaD	CDN85014.1	25000	92	61	2	65	154	527	612	7.6	25.4	159	25	57.8616
379	coaD	MTT19385.1	28000	50	33	2	29	77	3	50	8.1	24.6	159	28	31.4465
380	coaD	OLR32840.1	28000	50	33	2	29	77	3	50	8.1	24.6	159	28	31.4465
381	coaD	CDN84237.1	28000	50	33	2	29	77	3	50	8.1	24.6	159	28	31.4465
382	coaD	MTT19498.1	32353	34	23	0	106	139	73	106	8.8	25.4	159	32.353	21.3836
383	coaD	OLR35431.1	32353	34	23	0	106	139	73	106	8.8	25.4	159	32.353	21.3836
384	coaD	CDN83144.1	32353	34	23	0	106	139	75	108	9	25.4	159	32.353	21.3836
385	coaE	MTT18824.1	100000	206	0	0	1	206	1	206	6.62e-152	418	206	100	100
386	coaE	OLR36742.1	100000	206	0	0	1	206	1	206	6.62e-152	418	206	100	100
387	coaE	CDN80479.1	100000	206	0	0	1	206	1	206	6.62e-152	418	206	100	100
388	coaE	CDN84900.1	34615	52	32	1	54	103	6	57	2.3	27.3	206	34.615	25.2427
389	coaE	MTT22255.1	54545	22	10	0	4	25	30	51	2.6	27.3	206	54.545	10.6796
390	coaE	OLR29160.1	54545	22	10	0	4	25	30	51	2.6	27.3	206	54.545	10.6796
391	coaE	CDN85185.1	54545	22	10	0	4	25	30	51	2.6	27.3	206	54.545	10.6796
392	coaE	OLR32102.1	40000	35	20	1	1	34	1	35	2.7	26.9	206	40	16.9903
393	coaE	MTT21315.1	35714	28	18	0	4	31	3	30	3.3	26.9	206	35.714	13.5922
394	coaE	OLR34744.1	35714	28	18	0	4	31	3	30	3.3	26.9	206	35.714	13.5922
395	coaE	CDN83949.1	35714	28	18	0	4	31	3	30	3.3	26.9	206	35.714	13.5922
396	coaE	MTT18608.1	52632	19	9	0	4	22	29	47	3.9	26.9	206	52.632	9.2233
397	coaE	OLR36974.1	52632	19	9	0	4	22	29	47	3.9	26.9	206	52.632	9.2233
398	coaE	CDN81397.1	52632	19	9	0	4	22	29	47	3.9	26.9	206	52.632	9.2233
399	coaE	MTT18945.1	52381	21	10	0	5	25	234	254	6.3	26.2	206	52.381	10.1942
400	coaE	OLR36623.1	52381	21	10	0	5	25	234	254	6.3	26.2	206	52.381	10.1942
401	coaE	CDN85337.1	52381	21	10	0	5	25	241	261	6.5	26.2	206	52.381	10.1942
402	coaE	MTT19077.1	63158	19	7	0	2	20	367	385	8.2	25.8	206	63.158	9.2233
403	coaE	OLR37816.1	63158	19	7	0	2	20	367	385	8.2	25.8	206	63.158	9.2233
404	coaE	CDN80839.1	63158	19	7	0	2	20	367	385	8.2	25.8	206	63.158	9.2233
405	coaE	MTT20083.1	24107	112	69	3	33	134	248	353	9.6	25.8	206	24.107	54.3689
406	coaE	OLR37431.1	24107	112	69	3	33	134	248	353	9.6	25.8	206	24.107	54.3689
407	coaE	CDN81243.1	24107	112	69	3	33	134	248	353	9.6	25.8	206	24.107	54.3689
408	cohE	MTT22434.1	37681	69	38	2	5	68	4	72	1.8e-06	44.7	224	37.681	30.8036
409	cohE	CDN82584.1	37681	69	38	2	5	68	4	72	1.8e-06	44.7	224	37.681	30.8036
410	cohE	MTT20813.1	34783	92	56	3	129	219	51	139	2.99e-05	41.2	224	34.783	41.0714
411	cohE	OLR37241.1	34783	92	56	3	129	219	51	139	2.99e-05	41.2	224	34.783	41.0714
412	cohE	CDN81683.1	34783	92	56	3	129	219	51	139	2.99e-05	41.2	224	34.783	41.0714
413	cohE	MTT22423.1	26027	146	70	6	88	211	101	230	0.000119	40.4	224	26.027	65.1786
414	cohE	OLR37352.1	26027	146	70	6	88	211	101	230	0.000119	40.4	224	26.027	65.1786
415	cohE	CDN81810.1	26027	146	70	6	88	211	101	230	0.000119	40.4	224	26.027	65.1786
416	cohE	MTT18810.1	40909	44	26	0	126	169	130	173	0.000644	38.1	224	40.909	19.6429
417	cohE	OLR37391.1	40909	44	26	0	126	169	130	173	0.000644	38.1	224	40.909	19.6429
418	cohE	CDN81607.1	40909	44	26	0	126	169	152	195	0.000689	38.1	224	40.909	19.6429
419	cohE	MTT20531.1	39130	23	14	0	173	195	736	758	3.4	27.3	224	39.13	10.2679
420	cohE	OLR34293.1	39130	23	14	0	173	195	736	758	3.4	27.3	224	39.13	10.2679
421	cohE	CDN84801.1	39130	23	14	0	173	195	736	758	3.4	27.3	224	39.13	10.2679
422	cohE	MTT19354.1	26563	64	45	1	145	206	120	183	5.7	26.2	224	26.563	28.5714
423	cohE	OLR32870.1	26563	64	45	1	145	206	120	183	5.7	26.2	224	26.563	28.5714
424	cohE	CDN84204.1	26563	64	45	1	145	206	120	183	5.7	26.2	224	26.563	28.5714
425	cohE	MTT19833.1	36364	33	21	0	38	70	14	46	9.1	25.8	224	36.364	14.7321
426	cohE	OLR35891.1	36364	33	21	0	38	70	14	46	9.1	25.8	224	36.364	14.7321
427	cohE	CDN84353.1	36364	33	21	0	38	70	14	46	9.1	25.8	224	36.364	14.7321
428	csrA	MTT19692.1	100000	61	0	0	1	61	1	61	1.87e-39	122	61	100	100
429	csrA	OLR34545.1	100000	61	0	0	1	61	1	61	1.87e-39	122	61	100	100
430	csrA	CDN83295.1	100000	61	0	0	1	61	1	61	1.87e-39	122	61	100	100
431	csrA	MTT21368.1	42500	40	18	1	8	47	140	174	1.1	25	61	42.5	65.5738
432	csrA	OLR33552.1	42500	40	18	1	8	47	140	174	1.1	25	61	42.5	65.5738
433	csrA	CDN82709.1	42500	40	18	1	8	47	140	174	1.1	25	61	42.5	65.5738
434	csrA	MTT22141.1	31034	29	20	0	31	59	52	80	1.8	24.6	61	31.034	47.541
435	csrA	OLR37330.1	31034	29	20	0	31	59	52	80	1.8	24.6	61	31.034	47.541
436	csrA	CDN81782.1	31034	29	20	0	31	59	52	80	1.8	24.6	61	31.034	47.541
437	csrA	MTT21004.1	37931	29	14	1	8	36	180	204	5	23.1	61	37.931	47.541
438	csrA	OLR34084.1	37931	29	14	1	8	36	180	204	5	23.1	61	37.931	47.541
439	csrA	CDN84634.1	37931	29	14	1	8	36	180	204	5	23.1	61	37.931	47.541
440	csrA	MTT19932.1	37037	27	17	0	11	37	319	345	6.3	23.1	61	37.037	44.2623
441	csrA	OLR35138.1	37037	27	17	0	11	37	319	345	6.3	23.1	61	37.037	44.2623
442	csrA	CDN83565.1	37037	27	17	0	11	37	323	349	6.3	23.1	61	37.037	44.2623
443	csrA	MTT18975.1	55000	20	6	1	7	23	696	715	9	22.7	61	55	32.7869
444	csrA	OLR36593.1	55000	20	6	1	7	23	696	715	9	22.7	61	55	32.7869
445	csrA	CDN85306.1	55000	20	6	1	7	23	696	715	9	22.7	61	55	32.7869
446	cydA	MTT21447.1	100000	522	0	0	1	522	1	522	0	1066	522	100	100
447	cydA	OLR37566.1	100000	522	0	0	1	522	1	522	0	1066	522	100	100
448	cydA	CDN81104.1	100000	522	0	0	1	522	2	523	0	1066	522	100	100
449	cydA	MTT18654.1	61858	506	193	0	1	506	1	506	0	664	522	61.858	96.9349
450	cydA	OLR37018.1	61858	506	193	0	1	506	1	506	0	664	522	61.858	96.9349
451	cydA	CDN81444.1	61858	506	193	0	1	506	1	506	0	664	522	61.858	96.9349
452	cydA	MTT17693.1	30612	49	34	0	391	439	4	52	3.3	28.1	522	30.612	9.38697
453	cydA	OLR36071.1	30612	49	34	0	391	439	4	52	3.3	28.1	522	30.612	9.38697
454	cydA	CDN82872.1	30612	49	34	0	391	439	4	52	3.3	28.1	522	30.612	9.38697
455	cydA	MTT21080.1	41667	36	17	2	422	457	90	121	4.3	28.1	522	41.667	6.89655
456	cydA	OLR35757.1	41667	36	17	2	422	457	90	121	4.3	28.1	522	41.667	6.89655
457	cydA	CDN84559.1	41667	36	17	2	422	457	90	121	4.3	28.1	522	41.667	6.89655
458	cydA	MTT18956.1	33333	54	33	1	193	243	168	221	7.8	27.3	522	33.333	10.3448
459	cydA	OLR36611.1	33333	54	33	1	193	243	168	221	7.8	27.3	522	33.333	10.3448
460	cydA	CDN85325.1	33333	54	33	1	193	243	168	221	7.8	27.3	522	33.333	10.3448
461	cydA	MTT21212.1	45161	31	17	0	399	429	78	108	9.9	27.3	522	45.161	5.9387
462	cydA	OLR36796.1	45161	31	17	0	399	429	78	108	9.9	27.3	522	45.161	5.9387
463	cydA	CDN80533.1	45161	31	17	0	399	429	78	108	9.9	27.3	522	45.161	5.9387
464	cydB	MTT21446.1	100000	379	0	0	1	379	1	379	0	765	379	100	100
465	cydB	OLR37565.1	100000	379	0	0	1	379	1	379	0	765	379	100	100
466	cydB	CDN81105.1	100000	379	0	0	1	379	1	379	0	765	379	100	100
467	cydB	MTT18655.1	57520	379	160	1	1	379	1	378	6.12e-159	450	379	57.52	100
468	cydB	OLR37019.1	57520	379	160	1	1	379	1	378	6.12e-159	450	379	57.52	100
469	cydB	CDN81445.1	57520	379	160	1	1	379	1	378	6.12e-159	450	379	57.52	100
470	cydB	MTT21601.1	28261	92	52	3	169	247	207	297	0.85	30.4	379	28.261	24.2744
471	cydB	OLR38018.1	28261	92	52	3	169	247	207	297	0.85	30.4	379	28.261	24.2744
472	cydB	CDN80621.1	28261	92	52	3	169	247	207	297	0.85	30.4	379	28.261	24.2744
473	cydB	MTT19036.1	29032	31	22	0	346	376	58	88	8.2	26.2	379	29.032	8.17942
474	cydB	OLR37775.1	29032	31	22	0	346	376	58	88	8.2	26.2	379	29.032	8.17942
475	cydB	CDN80882.1	29032	31	22	0	346	376	58	88	8.2	26.2	379	29.032	8.17942
476	cydC	MTT20074.1	98953	573	6	0	1	573	1	573	0	1132	573	98.953	100
477	cydC	OLR37422.1	98953	573	6	0	1	573	1	573	0	1132	573	98.953	100
478	cydC	CDN81252.1	98953	573	6	0	1	573	1	573	0	1132	573	98.953	100
479	cydC	MTT18598.1	28543	494	330	8	90	571	95	577	1.41e-57	201	573	28.543	86.2129
480	cydC	OLR36964.1	28543	494	330	8	90	571	95	577	1.41e-57	201	573	28.543	86.2129
481	cydC	CDN81387.1	28543	494	330	8	90	571	95	577	1.41e-57	201	573	28.543	86.2129
482	cydC	MTT21686.1	29470	509	310	14	84	572	100	579	1.65e-46	171	573	29.47	88.8307
483	cydC	OLR32759.1	29470	509	310	14	84	572	100	579	1.65e-46	171	573	29.47	88.8307
484	cydC	CDN82598.1	29470	509	310	14	84	572	100	579	1.65e-46	171	573	29.47	88.8307
485	cydC	MTT19078.1	27107	605	369	13	4	571	3	572	5.8e-46	169	573	27.107	105.585
486	cydC	OLR37817.1	27107	605	369	13	4	571	3	572	5.8e-46	169	573	27.107	105.585
487	cydC	CDN80838.1	27107	605	369	13	4	571	3	572	5.8e-46	169	573	27.107	105.585
488	cydC	OLR32760.1	29175	521	349	14	62	571	36	547	6.9e-42	157	573	29.175	90.925
489	cydC	CDN82599.1	29175	521	349	14	62	571	36	547	6.9e-42	157	573	29.175	90.925
490	cydC	MTT21685.1	29175	521	349	14	62	571	66	577	1.23e-41	157	573	29.175	90.925
491	cydC	MTT19077.1	26629	537	364	11	43	571	59	573	2.08e-35	139	573	26.629	93.7173
492	cydC	OLR37816.1	26629	537	364	11	43	571	59	573	2.08e-35	139	573	26.629	93.7173
493	cydC	CDN80839.1	26629	537	364	11	43	571	59	573	2.08e-35	139	573	26.629	93.7173
494	cydC	MTT20073.1	28343	501	317	15	93	566	92	577	6.26e-34	134	573	28.343	87.4346
495	cydC	OLR37421.1	28343	501	317	15	93	566	92	577	6.26e-34	134	573	28.343	87.4346
496	cydC	CDN81253.1	28343	501	317	15	93	566	92	577	6.26e-34	134	573	28.343	87.4346
497	cydC	MTT19369.1	35268	224	119	7	346	552	18	232	1.38e-27	110	573	35.268	39.0925
498	cydC	OLR32855.1	35268	224	119	7	346	552	18	232	1.38e-27	110	573	35.268	39.0925
499	cydC	CDN84219.1	35268	224	119	7	346	552	18	232	1.38e-27	110	573	35.268	39.0925
500	cydC	MTT22225.1	36066	183	105	4	355	531	25	201	5.33e-26	105	573	36.066	31.9372
501	cydC	OLR29021.1	36066	183	105	4	355	531	25	201	5.33e-26	105	573	36.066	31.9372
502	cydC	CDN85442.1	36066	183	105	4	355	531	25	201	5.33e-26	105	573	36.066	31.9372
503	cydC	MTT22255.1	33043	230	144	6	339	561	1	227	1.03e-24	102	573	33.043	40.1396
504	cydC	OLR29160.1	33043	230	144	6	339	561	1	227	1.03e-24	102	573	33.043	40.1396
505	cydC	CDN85185.1	33043	230	144	6	339	561	1	227	1.03e-24	102	573	33.043	40.1396
506	cydC	MTT21158.1	35484	217	128	7	354	562	19	231	3.16e-24	102	573	35.484	37.8709
507	cydC	OLR36849.1	35484	217	128	7	354	562	19	231	3.16e-24	102	573	35.484	37.8709
508	cydC	CDN80591.1	35484	217	128	7	354	562	19	231	3.16e-24	102	573	35.484	37.8709
509	cydC	MTT20465.1	34914	232	132	8	353	569	16	243	7.13e-24	99.4	573	34.914	40.4887
510	cydC	OLR34220.1	34914	232	132	8	353	569	16	243	7.13e-24	99.4	573	34.914	40.4887
511	cydC	CDN82478.1	34914	232	132	8	353	569	16	243	7.13e-24	99.4	573	34.914	40.4887
512	cydC	MTT21081.1	30453	243	147	7	338	565	10	245	8.27e-23	96.7	573	30.453	42.4084
513	cydC	OLR35758.1	30453	243	147	7	338	565	10	245	8.27e-23	96.7	573	30.453	42.4084
514	cydC	CDN84558.1	30453	243	147	7	338	565	10	245	8.27e-23	96.7	573	30.453	42.4084
515	cydC	MTT20080.1	32735	223	139	5	339	553	5	224	1.77e-22	100	573	32.735	38.918
516	cydC	OLR37428.1	32735	223	139	5	339	553	5	224	1.77e-22	100	573	32.735	38.918
517	cydC	CDN81246.1	32735	223	139	5	339	553	5	224	1.77e-22	100	573	32.735	38.918
518	cydC	MTT18778.1	33766	231	129	7	335	550	2	223	9.18e-22	92.8	573	33.766	40.3141
519	cydC	OLR37138.1	33766	231	129	7	335	550	2	223	9.18e-22	92.8	573	33.766	40.3141
520	cydC	CDN81575.1	33766	231	129	7	335	550	2	223	9.18e-22	92.8	573	33.766	40.3141
521	cydC	MTT21206.1	29825	228	153	5	338	560	11	236	2.84e-21	92.4	573	29.825	39.7906
522	cydC	OLR36802.1	29825	228	153	5	338	560	11	236	2.84e-21	92.4	573	29.825	39.7906
523	cydC	CDN80540.1	29825	228	153	5	338	560	11	236	2.84e-21	92.4	573	29.825	39.7906
524	cydC	MTT21251.1	33482	224	120	11	354	561	26	236	5.68e-20	88.2	573	33.482	39.0925
525	cydC	OLR34682.1	33482	224	120	11	354	561	26	236	5.68e-20	88.2	573	33.482	39.0925
526	cydC	CDN84016.1	33482	224	120	11	354	561	26	236	5.68e-20	88.2	573	33.482	39.0925
527	cydC	MTT20723.1	35025	197	101	8	372	553	33	217	1.29e-19	87	573	35.025	34.3805
528	cydC	OLR37642.1	35025	197	101	8	372	553	33	217	1.29e-19	87	573	35.025	34.3805
529	cydC	CDN81023.1	35025	197	101	8	372	553	33	217	1.29e-19	87	573	35.025	34.3805
530	cydC	MTT19029.1	35545	211	114	5	356	553	26	227	1.7e-19	86.3	573	35.545	36.8237
531	cydC	OLR37770.1	35545	211	114	5	356	553	26	227	1.7e-19	86.3	573	35.545	36.8237
532	cydC	CDN80889.1	35545	211	114	5	356	553	26	227	1.7e-19	86.3	573	35.545	36.8237
533	cydC	MTT20095.1	32870	216	126	7	352	554	14	223	2.46e-19	86.3	573	32.87	37.6963
534	cydC	OLR37442.1	32870	216	126	7	352	554	14	223	2.46e-19	86.3	573	32.87	37.6963
535	cydC	CDN81230.1	32870	216	126	7	352	554	47	256	2.89e-19	86.7	573	32.87	37.6963
536	cydC	MTT21235.1	31140	228	151	5	337	562	3	226	3.69e-19	87	573	31.14	39.7906
537	cydC	OLR36774.1	31140	228	151	5	337	562	3	226	3.69e-19	87	573	31.14	39.7906
538	cydC	CDN80510.1	31140	228	151	5	337	562	3	226	3.69e-19	87	573	31.14	39.7906
539	cydC	MTT17710.1	26776	366	219	13	207	552	193	529	7.22e-19	88.6	573	26.776	63.8743
540	cydC	OLR36088.1	26776	366	219	13	207	552	193	529	7.22e-19	88.6	573	26.776	63.8743
541	cydC	CDN82889.1	26776	366	219	13	207	552	193	529	7.22e-19	88.6	573	26.776	63.8743
542	cydC	MTT19352.1	35567	194	111	6	353	538	15	202	1.21e-18	83.6	573	35.567	33.8569
543	cydC	OLR32872.1	35567	194	111	6	353	538	15	202	1.21e-18	83.6	573	35.567	33.8569
544	cydC	CDN84202.1	35567	194	111	6	353	538	15	202	1.21e-18	83.6	573	35.567	33.8569
545	cydC	MTT19402.1	28326	233	144	6	346	564	7	230	1.28e-18	84.3	573	28.326	40.6632
546	cydC	OLR32822.1	28326	233	144	6	346	564	7	230	1.28e-18	84.3	573	28.326	40.6632
547	cydC	MTT20150.1	30144	209	133	6	354	554	15	218	1.51e-18	84	573	30.144	36.4747
548	cydC	OLR37496.1	30144	209	133	6	354	554	15	218	1.51e-18	84	573	30.144	36.4747
549	cydC	CDN81176.1	30144	209	133	6	354	554	15	218	1.51e-18	84	573	30.144	36.4747
550	cydC	MTT19778.1	29130	230	149	6	349	567	31	257	1.85e-18	85.5	573	29.13	40.1396
551	cydC	OLR35948.1	29130	230	149	6	349	567	31	257	1.85e-18	85.5	573	29.13	40.1396
552	cydC	CDN84296.1	29130	230	149	6	349	567	31	257	1.85e-18	85.5	573	29.13	40.1396
553	cydC	MTT19368.1	28509	228	142	6	339	554	5	223	2.12e-18	83.6	573	28.509	39.7906
554	cydC	OLR32856.1	28509	228	142	6	339	554	5	223	2.12e-18	83.6	573	28.509	39.7906
555	cydC	CDN84218.1	28509	228	142	6	339	554	5	223	2.12e-18	83.6	573	28.509	39.7906
556	cydC	CDN84257.1	28326	233	144	6	346	564	17	240	3.23e-18	83.6	573	28.326	40.6632
557	cydC	CDN80442.1	31401	207	131	6	360	561	26	226	3.44e-18	82.8	573	31.401	36.1257
558	cydC	MTT19034.1	30612	196	122	4	356	545	23	210	3.64e-18	82.4	573	30.612	34.2059
559	cydC	OLR37773.1	30612	196	122	4	356	545	23	210	3.64e-18	82.4	573	30.612	34.2059
560	cydC	CDN80884.1	30612	196	122	4	356	545	23	210	3.64e-18	82.4	573	30.612	34.2059
561	cydC	MTT18860.1	31401	207	131	6	360	561	19	219	3.98e-18	82.4	573	31.401	36.1257
562	cydC	OLR36707.1	31401	207	131	6	360	561	19	219	3.98e-18	82.4	573	31.401	36.1257
563	cydC	MTT18617.1	31696	224	131	6	332	550	5	211	8.02e-18	82	573	31.696	39.0925
564	cydC	OLR36983.1	31696	224	131	6	332	550	5	211	8.02e-18	82	573	31.696	39.0925
565	cydC	CDN81406.1	31696	224	131	6	332	550	5	211	8.02e-18	82	573	31.696	39.0925
566	cydC	OLR29449.1	30556	216	132	6	353	560	14	219	1.05e-17	83.6	573	30.556	37.6963
567	cydC	MTT22121.1	30093	216	133	6	353	560	14	219	2.11e-17	82.4	573	30.093	37.6963
568	cydC	MTT17682.1	30131	229	134	7	356	567	302	521	2.66e-17	83.6	573	30.131	39.9651
569	cydC	MTT17682.1	29317	249	148	8	344	570	13	255	7.16e-15	75.9	573	29.317	43.4555
570	cydC	OLR36057.1	30131	229	134	7	356	567	302	521	2.66e-17	83.6	573	30.131	39.9651
571	cydC	OLR36057.1	29317	249	148	8	344	570	13	255	7.16e-15	75.9	573	29.317	43.4555
572	cydC	CDN82859.1	30131	229	134	7	356	567	302	521	2.66e-17	83.6	573	30.131	39.9651
573	cydC	CDN82859.1	29317	249	148	8	344	570	13	255	7.16e-15	75.9	573	29.317	43.4555
574	cydC	MTT20664.1	28761	226	154	4	341	560	8	232	2.83e-17	80.9	573	28.761	39.4415
575	cydC	OLR37701.1	28761	226	154	4	341	560	8	232	2.83e-17	80.9	573	28.761	39.4415
576	cydC	CDN80961.1	28761	226	154	4	341	560	8	232	2.83e-17	80.9	573	28.761	39.4415
577	cydC	MTT19707.1	29646	226	136	8	356	567	44	260	3.63e-17	82.4	573	29.646	39.4415
578	cydC	OLR31826.1	29646	226	136	8	356	567	44	260	3.63e-17	82.4	573	29.646	39.4415
579	cydC	CDN83277.1	29646	226	136	8	356	567	44	260	3.63e-17	82.4	573	29.646	39.4415
580	cydC	OLR32900.1	30317	221	132	7	354	563	15	224	3.81e-17	79.7	573	30.317	38.5689
581	cydC	CDN81221.1	29588	267	170	10	299	559	10	264	4.32e-17	82	573	29.588	46.5969
582	cydC	MTT19341.1	29583	240	145	8	335	563	2	228	4.42e-17	79.3	573	29.583	41.8848
583	cydC	CDN84190.1	29583	240	145	8	335	563	6	232	5.17e-17	79.3	573	29.583	41.8848
584	cydC	MTT20890.1	28509	228	140	8	348	561	22	240	6.58e-17	79.7	573	28.509	39.7906
585	cydC	OLR35219.1	28509	228	140	8	348	561	22	240	6.58e-17	79.7	573	28.509	39.7906
586	cydC	CDN81909.1	28509	228	140	8	348	561	22	240	6.58e-17	79.7	573	28.509	39.7906
587	cydC	CDN84230.1	28276	290	186	10	287	564	219	498	8.6e-17	82.8	573	28.276	50.6108
588	cydC	CDN84230.1	27315	216	139	7	355	559	26	234	3.97e-13	70.9	573	27.315	37.6963
589	cydC	MTT19379.1	28276	290	186	10	287	564	220	499	8.75e-17	82.4	573	28.276	50.6108
590	cydC	MTT19379.1	27315	216	139	7	355	559	27	235	4.01e-13	70.9	573	27.315	37.6963
591	cydC	OLR32845.1	28276	290	186	10	287	564	220	499	8.75e-17	82.4	573	28.276	50.6108
592	cydC	OLR32845.1	27315	216	139	7	355	559	27	235	4.01e-13	70.9	573	27.315	37.6963
593	cydC	MTT22072.1	26563	256	142	10	333	559	14	252	1.13e-16	80.1	573	26.563	44.6771
594	cydC	OLR37336.1	26563	256	142	10	333	559	14	252	1.13e-16	80.1	573	26.563	44.6771
595	cydC	CDN81792.1	26563	256	142	10	333	559	14	252	1.13e-16	80.1	573	26.563	44.6771
596	cydC	MTT20104.1	30544	239	151	9	327	559	8	237	1.4e-16	80.1	573	30.544	41.7103
597	cydC	OLR37451.1	30544	239	151	9	327	559	8	237	1.4e-16	80.1	573	30.544	41.7103
598	cydC	MTT20277.1	29224	219	129	7	356	557	25	234	2.37e-16	77.8	573	29.224	38.2199
599	cydC	OLR35643.1	29224	219	129	7	356	557	25	234	2.37e-16	77.8	573	29.224	38.2199
600	cydC	CDN83777.1	29224	219	129	7	356	557	25	234	2.37e-16	77.8	573	29.224	38.2199
601	cydC	MTT17999.1	29384	211	138	5	354	554	19	228	3.41e-16	77	573	29.384	36.8237
602	cydC	OLR36417.1	29384	211	138	5	354	554	19	228	3.41e-16	77	573	29.384	36.8237
603	cydC	CDN84968.1	29384	211	138	5	354	554	29	238	5.09e-16	77	573	29.384	36.8237
604	cydC	MTT17631.1	26667	225	144	6	344	555	2	218	1.01e-15	76.6	573	26.667	39.267
605	cydC	OLR36006.1	26667	225	144	6	344	555	2	218	1.01e-15	76.6	573	26.667	39.267
606	cydC	CDN82807.1	26667	225	144	6	344	555	2	218	1.01e-15	76.6	573	26.667	39.267
607	cydC	MTT18182.1	30493	223	125	10	339	555	5	203	1.74e-15	75.1	573	30.493	38.918
608	cydC	OLR35010.1	30493	223	125	10	339	555	5	203	1.74e-15	75.1	573	30.493	38.918
609	cydC	CDN82362.1	30493	223	125	10	339	555	5	203	1.74e-15	75.1	573	30.493	38.918
610	cydC	MTT17800.1	29885	261	146	9	338	572	5	254	1.75e-15	75.1	573	29.885	45.5497
611	cydC	OLR36178.1	29885	261	146	9	338	572	5	254	1.75e-15	75.1	573	29.885	45.5497
612	cydC	CDN82983.1	29885	261	146	9	338	572	5	254	1.75e-15	75.1	573	29.885	45.5497
613	cydC	MTT17916.1	30189	212	129	7	357	559	20	221	1.85e-15	76.6	573	30.189	36.9983
614	cydC	OLR36498.1	30189	212	129	7	357	559	20	221	1.85e-15	76.6	573	30.189	36.9983
615	cydC	MTT20911.1	27826	230	133	9	339	553	4	215	2.27e-15	76.3	573	27.826	40.1396
616	cydC	OLR35239.1	27826	230	133	9	339	553	4	215	2.27e-15	76.3	573	27.826	40.1396
617	cydC	CDN81930.1	27826	230	133	9	339	553	4	215	2.27e-15	76.3	573	27.826	40.1396
618	cydC	MTT20797.1	31313	198	129	5	339	532	4	198	2.6e-15	74.7	573	31.313	34.555
619	cydC	OLR37257.1	31313	198	129	5	339	532	4	198	2.6e-15	74.7	573	31.313	34.555
620	cydC	CDN81699.1	31313	198	129	5	339	532	4	198	2.6e-15	74.7	573	31.313	34.555
621	cydC	MTT21319.1	30263	228	149	7	338	560	3	225	2.63e-15	74.3	573	30.263	39.7906
622	cydC	OLR34748.1	30263	228	149	7	338	560	3	225	2.63e-15	74.3	573	30.263	39.7906
623	cydC	CDN83945.1	30263	228	149	7	338	560	3	225	2.63e-15	74.3	573	30.263	39.7906
624	cydC	CDN84880.1	30189	212	129	7	357	559	50	251	4e-15	75.9	573	30.189	36.9983
625	cydC	MTT20840.1	27826	230	139	7	339	554	7	223	6.19e-15	73.9	573	27.826	40.1396
626	cydC	OLR37213.1	27826	230	139	7	339	554	7	223	6.19e-15	73.9	573	27.826	40.1396
627	cydC	CDN81652.1	27826	230	139	7	339	554	6	222	6.89e-15	73.6	573	27.826	40.1396
628	cydC	MTT18283.1	30516	213	134	6	339	545	2	206	8.82e-15	72.4	573	30.516	37.1728
629	cydC	OLR34908.1	30516	213	134	6	339	545	2	206	8.82e-15	72.4	573	30.516	37.1728
630	cydC	CDN82260.1	30493	223	139	7	329	545	5	217	8.94e-15	72.4	573	30.493	38.918
631	cydC	MTT20393.1	27876	226	149	7	339	556	8	227	1.71e-14	74.7	573	27.876	39.4415
632	cydC	MTT20393.1	21645	231	140	6	359	563	275	490	3.23e-06	48.5	573	21.645	40.3141
633	cydC	OLR34149.1	27876	226	149	7	339	556	8	227	1.71e-14	74.7	573	27.876	39.4415
634	cydC	OLR34149.1	21645	231	140	6	359	563	275	490	3.23e-06	48.5	573	21.645	40.3141
635	cydC	CDN82403.1	27876	226	149	7	339	556	23	242	2.59e-14	73.9	573	27.876	39.4415
636	cydC	CDN82403.1	21645	231	140	6	359	563	290	505	3.97e-06	48.1	573	21.645	40.3141
637	cydC	MTT19155.1	32275	189	103	6	355	533	16	189	3.55e-14	71.2	573	32.275	32.9843
638	cydC	OLR37895.1	32275	189	103	6	355	533	16	189	3.55e-14	71.2	573	32.275	32.9843
639	cydC	CDN80756.1	32275	189	103	6	355	533	16	189	3.55e-14	71.2	573	32.275	32.9843
640	cydC	MTT19342.1	28571	224	139	7	355	559	20	241	3.58e-14	71.2	573	28.571	39.0925
641	cydC	OLR32881.1	28571	224	139	7	355	559	20	241	3.58e-14	71.2	573	28.571	39.0925
642	cydC	CDN84191.1	28571	224	139	7	355	559	20	241	3.58e-14	71.2	573	28.571	39.0925
643	cydC	CDN84185.1	30093	216	136	9	354	562	31	238	4.09e-14	72.8	573	30.093	37.6963
644	cydC	MTT19337.1	30093	216	136	9	354	562	18	225	4.19e-14	72.4	573	30.093	37.6963
645	cydC	OLR32886.1	30093	216	136	9	354	562	18	225	4.19e-14	72.4	573	30.093	37.6963
646	cydC	MTT18787.1	29493	217	132	7	353	559	30	235	4.92e-14	72.4	573	29.493	37.8709
647	cydC	OLR37147.1	29493	217	132	7	353	559	30	235	4.92e-14	72.4	573	29.493	37.8709
648	cydC	CDN81584.1	29493	217	132	7	353	559	30	235	4.92e-14	72.4	573	29.493	37.8709
649	cydC	CDN81160.1	26201	229	160	6	329	554	2	224	6.93e-14	72.8	573	26.201	39.9651
650	cydC	CDN81160.1	27523	218	148	5	355	568	349	560	1.39e-10	62.4	573	27.523	38.0454
651	cydC	MTT20164.1	26027	219	154	5	339	554	6	219	8.11e-14	72.8	573	26.027	38.2199
652	cydC	MTT20164.1	27523	218	148	5	355	568	344	555	1.5e-10	62.4	573	27.523	38.0454
653	cydC	OLR37510.1	26027	219	154	5	339	554	6	219	8.11e-14	72.8	573	26.027	38.2199
654	cydC	OLR37510.1	27523	218	148	5	355	568	344	555	1.5e-10	62.4	573	27.523	38.0454
655	cydC	MTT17998.1	30556	180	100	5	356	519	24	194	1.9e-13	68.6	573	30.556	31.4136
656	cydC	OLR36418.1	30556	180	100	5	356	519	24	194	1.9e-13	68.6	573	30.556	31.4136
657	cydC	CDN84967.1	30556	180	100	5	356	519	24	194	1.9e-13	68.6	573	30.556	31.4136
658	cydC	MTT17975.1	35122	205	110	10	339	531	4	197	3.86e-13	67.8	573	35.122	35.7766
659	cydC	OLR36441.1	35122	205	110	10	339	531	4	197	3.86e-13	67.8	573	35.122	35.7766
660	cydC	CDN84943.1	35122	205	110	10	339	531	4	197	3.86e-13	67.8	573	35.122	35.7766
661	cydC	MTT20651.1	27434	226	148	8	337	553	16	234	9.24e-13	69.3	573	27.434	39.4415
662	cydC	MTT20651.1	23394	218	134	7	356	550	285	492	1.6e-08	55.8	573	23.394	38.0454
663	cydC	OLR37714.1	27434	226	148	8	337	553	16	234	9.24e-13	69.3	573	27.434	39.4415
664	cydC	OLR37714.1	23394	218	134	7	356	550	285	492	1.6e-08	55.8	573	23.394	38.0454
665	cydC	CDN80947.1	27434	226	148	8	337	553	16	234	9.24e-13	69.3	573	27.434	39.4415
666	cydC	CDN80947.1	23394	218	134	7	356	550	285	492	1.6e-08	55.8	573	23.394	38.0454
667	cydC	MTT20130.1	29358	218	128	6	354	554	338	546	1.07e-12	69.3	573	29.358	38.0454
668	cydC	MTT20130.1	25630	238	148	7	343	555	19	252	3.45e-10	61.2	573	25.63	41.5358
669	cydC	OLR37476.1	29358	218	128	6	354	554	338	546	1.07e-12	69.3	573	29.358	38.0454
670	cydC	OLR37476.1	25630	238	148	7	343	555	19	252	3.45e-10	61.2	573	25.63	41.5358
671	cydC	CDN81195.1	29358	218	128	6	354	554	338	546	1.07e-12	69.3	573	29.358	38.0454
672	cydC	CDN81195.1	25630	238	148	7	343	555	19	252	3.45e-10	61.2	573	25.63	41.5358
673	cydC	MTT22073.1	29661	236	144	7	339	555	20	252	1.36e-12	67.8	573	29.661	41.1867
674	cydC	OLR37335.1	29661	236	144	7	339	555	20	252	1.36e-12	67.8	573	29.661	41.1867
675	cydC	CDN81791.1	29661	236	144	7	339	555	20	252	1.36e-12	67.8	573	29.661	41.1867
676	cydC	MTT19556.1	30876	217	138	7	354	563	16	227	1.64e-12	67.8	573	30.876	37.8709
677	cydC	OLR35375.1	30876	217	138	7	354	563	16	227	1.64e-12	67.8	573	30.876	37.8709
678	cydC	CDN83086.1	30876	217	138	7	354	563	16	227	1.64e-12	67.8	573	30.876	37.8709
679	cydC	MTT18141.1	31884	207	127	8	354	551	23	224	4.53e-12	67	573	31.884	36.1257
680	cydC	MTT18141.1	24171	211	135	9	360	552	280	483	0.001	40	573	24.171	36.8237
681	cydC	OLR36280.1	31884	207	127	8	354	551	23	224	4.53e-12	67	573	31.884	36.1257
682	cydC	OLR36280.1	24171	211	135	9	360	552	280	483	0.001	40	573	24.171	36.8237
683	cydC	CDN85114.1	31884	207	127	8	354	551	23	224	4.53e-12	67	573	31.884	36.1257
684	cydC	CDN85114.1	24171	211	135	9	360	552	280	483	0.001	40	573	24.171	36.8237
685	cydC	MTT21550.1	28169	213	144	5	354	562	18	225	5.47e-12	65.9	573	28.169	37.1728
686	cydC	OLR35306.1	28169	213	144	5	354	562	18	225	5.47e-12	65.9	573	28.169	37.1728
687	cydC	CDN81999.1	28169	213	144	5	354	562	18	225	5.47e-12	65.9	573	28.169	37.1728
688	cydC	OLR35555.1	27053	207	129	5	349	551	14	202	1.14e-11	63.2	573	27.053	36.1257
689	cydC	MTT17989.1	27751	209	143	5	354	554	19	227	1.36e-11	65.5	573	27.751	36.4747
690	cydC	MTT17989.1	22857	210	121	6	351	533	274	469	1.6e-06	49.3	573	22.857	36.6492
691	cydC	OLR36426.1	27751	209	143	5	354	554	19	227	1.36e-11	65.5	573	27.751	36.4747
692	cydC	OLR36426.1	22857	210	121	6	351	533	274	469	1.6e-06	49.3	573	22.857	36.6492
693	cydC	CDN84958.1	27751	209	143	5	354	554	19	227	1.36e-11	65.5	573	27.751	36.4747
694	cydC	CDN84958.1	22857	210	121	6	351	533	274	469	1.6e-06	49.3	573	22.857	36.6492
695	cydC	CDN81126.1	27826	230	148	4	340	560	7	227	1.4e-11	65.5	573	27.826	40.1396
696	cydC	CDN81126.1	28058	278	161	11	280	532	202	465	1.06e-08	56.2	573	28.058	48.5166
697	cydC	MTT20198.1	27826	230	148	4	340	560	3	223	1.68e-11	65.1	573	27.826	40.1396
698	cydC	MTT20198.1	28058	278	161	11	280	532	198	461	1.37e-08	55.8	573	28.058	48.5166
699	cydC	OLR37545.1	27826	230	148	4	340	560	3	223	1.68e-11	65.1	573	27.826	40.1396
700	cydC	OLR37545.1	28058	278	161	11	280	532	198	461	1.37e-08	55.8	573	28.058	48.5166
701	cydC	MTT21270.1	30769	221	123	11	354	558	19	225	3.1e-11	64.3	573	30.769	38.5689
702	cydC	MTT21270.1	26250	80	57	2	475	552	400	479	0.3	32.3	573	26.25	13.9616
703	cydC	OLR34701.1	30769	221	123	11	354	558	19	225	3.1e-11	64.3	573	30.769	38.5689
704	cydC	OLR34701.1	26250	80	57	2	475	552	400	479	0.3	32.3	573	26.25	13.9616
705	cydC	CDN83997.1	30769	221	123	11	354	558	19	225	3.1e-11	64.3	573	30.769	38.5689
706	cydC	CDN83997.1	26250	80	57	2	475	552	400	479	0.3	32.3	573	26.25	13.9616
707	cydC	MTT21325.1	30041	243	158	7	339	573	9	247	6.87e-11	61.6	573	30.041	42.4084
708	cydC	OLR34754.1	30041	243	158	7	339	573	9	247	6.87e-11	61.6	573	30.041	42.4084
709	cydC	CDN83939.1	30041	243	158	7	339	573	9	247	6.87e-11	61.6	573	30.041	42.4084
710	cydC	CDN83549.1	27313	227	150	7	332	550	6	225	1.11e-10	60.5	573	27.313	39.6161
711	cydC	MTT18007.1	25439	228	137	7	353	555	17	236	1.5e-10	60.5	573	25.439	39.7906
712	cydC	OLR36409.1	25439	228	137	7	353	555	17	236	1.5e-10	60.5	573	25.439	39.7906
713	cydC	CDN84976.1	25439	228	137	7	353	555	17	236	1.5e-10	60.5	573	25.439	39.7906
714	cydC	MTT19947.1	27273	220	145	7	339	550	2	214	1.76e-10	59.7	573	27.273	38.3944
715	cydC	OLR35121.1	27273	220	145	7	339	550	2	214	1.76e-10	59.7	573	27.273	38.3944
716	cydC	MTT19804.1	26818	220	151	7	339	551	5	221	3.54e-10	60.8	573	26.818	38.3944
717	cydC	MTT19804.1	24186	215	135	6	356	550	277	483	1.56e-07	52.4	573	24.186	37.5218
718	cydC	OLR35920.1	26818	220	151	7	339	551	5	221	3.54e-10	60.8	573	26.818	38.3944
719	cydC	OLR35920.1	24186	215	135	6	356	550	277	483	1.56e-07	52.4	573	24.186	37.5218
720	cydC	CDN84323.1	26818	220	151	7	339	551	5	221	3.54e-10	60.8	573	26.818	38.3944
721	cydC	CDN84323.1	24186	215	135	6	356	550	277	483	1.56e-07	52.4	573	24.186	37.5218
722	cydC	MTT21950.1	26396	197	124	4	349	542	14	192	3.63e-10	58.9	573	26.396	34.3805
723	cydC	CDN83688.1	25500	200	128	4	349	545	14	195	4.94e-10	58.5	573	25.5	34.904
724	cydC	MTT19779.1	39394	99	56	3	474	568	153	251	1.03e-09	58.5	573	39.394	17.2775
725	cydC	OLR35947.1	39394	99	56	3	474	568	153	251	1.03e-09	58.5	573	39.394	17.2775
726	cydC	CDN84297.1	39394	99	56	3	474	568	153	251	1.03e-09	58.5	573	39.394	17.2775
727	cydC	MTT17699.1	29143	175	115	2	356	530	17	182	2.96e-09	55.8	573	29.143	30.541
728	cydC	OLR36077.1	29143	175	115	2	356	530	17	182	2.96e-09	55.8	573	29.143	30.541
729	cydC	CDN82878.1	29143	175	115	2	356	530	19	184	3.02e-09	55.8	573	29.143	30.541
730	cydC	MTT22156.1	28571	210	135	7	356	559	27	227	3.73e-09	57.8	573	28.571	36.6492
731	cydC	MTT22156.1	25000	212	135	7	354	549	277	480	3.42e-06	48.1	573	25	36.9983
732	cydC	MTT21057.1	22594	239	152	7	339	559	5	228	3.81e-09	57.8	573	22.594	41.7103
733	cydC	MTT21057.1	31915	94	57	3	475	561	396	489	3.17e-05	45.1	573	31.915	16.4049
734	cydC	OLR35736.1	22594	239	152	7	339	559	5	228	3.81e-09	57.8	573	22.594	41.7103
735	cydC	OLR35736.1	31915	94	57	3	475	561	396	489	3.17e-05	45.1	573	31.915	16.4049
736	cydC	CDN84582.1	22594	239	152	7	339	559	5	228	3.81e-09	57.8	573	22.594	41.7103
737	cydC	CDN84582.1	31915	94	57	3	475	561	396	489	3.17e-05	45.1	573	31.915	16.4049
738	cydC	MTT20891.1	25200	250	155	9	344	567	11	254	8.18e-09	55.8	573	25.2	43.63
739	cydC	OLR35220.1	25200	250	155	9	344	567	11	254	8.18e-09	55.8	573	25.2	43.63
740	cydC	CDN81910.1	25200	250	155	9	344	567	11	254	8.18e-09	55.8	573	25.2	43.63
741	cydC	CDN84944.1	34074	135	78	6	443	567	130	263	9.3e-09	55.5	573	34.074	23.5602
742	cydC	MTT17976.1	34711	121	69	5	443	553	110	230	1.27e-08	55.1	573	34.711	21.1169
743	cydC	OLR36440.1	34711	121	69	5	443	553	110	230	1.27e-08	55.1	573	34.711	21.1169
744	cydC	MTT19455.1	26570	207	137	6	355	550	25	227	1.65e-08	55.8	573	26.57	36.1257
745	cydC	MTT19455.1	23182	220	139	6	356	558	278	484	6.61e-06	47.4	573	23.182	38.3944
746	cydC	OLR35472.1	26570	207	137	6	355	550	25	227	1.65e-08	55.8	573	26.57	36.1257
747	cydC	OLR35472.1	23182	220	139	6	356	558	278	484	6.61e-06	47.4	573	23.182	38.3944
748	cydC	CDN83190.1	26570	207	137	6	355	550	25	227	1.65e-08	55.8	573	26.57	36.1257
749	cydC	CDN83190.1	23182	220	139	6	356	558	278	484	6.61e-06	47.4	573	23.182	38.3944
750	cydC	MTT18944.1	31841	201	107	8	356	531	22	217	1.87e-08	55.5	573	31.841	35.0785
751	cydC	MTT18944.1	26842	190	117	9	332	516	318	490	0.001	40	573	26.842	33.1588
752	cydC	OLR36624.1	31841	201	107	8	356	531	22	217	1.87e-08	55.5	573	31.841	35.0785
753	cydC	OLR36624.1	26842	190	117	9	332	516	318	490	0.001	40	573	26.842	33.1588
754	cydC	CDN85338.1	31841	201	107	8	356	531	22	217	1.87e-08	55.5	573	31.841	35.0785
755	cydC	CDN85338.1	26842	190	117	9	332	516	318	490	0.001	40	573	26.842	33.1588
756	cydC	MTT18328.1	26415	212	137	7	359	560	19	221	7.53e-08	52.4	573	26.415	36.9983
757	cydC	OLR34862.1	26415	212	137	7	359	560	19	221	7.53e-08	52.4	573	26.415	36.9983
758	cydC	CDN82213.1	26415	212	137	7	359	560	19	221	7.53e-08	52.4	573	26.415	36.9983
759	cydC	MTT17651.1	25221	226	145	10	339	551	14	228	2.98e-07	51.6	573	25.221	39.4415
760	cydC	MTT17651.1	23333	240	156	9	326	548	254	482	8.9e-07	50.1	573	23.333	41.8848
761	cydC	OLR36025.1	25221	226	145	10	339	551	14	228	2.98e-07	51.6	573	25.221	39.4415
762	cydC	OLR36025.1	23333	240	156	9	326	548	254	482	8.9e-07	50.1	573	23.333	41.8848
763	cydC	CDN82828.1	25221	226	145	10	339	551	14	228	2.98e-07	51.6	573	25.221	39.4415
764	cydC	CDN82828.1	23333	240	156	9	326	548	254	482	8.9e-07	50.1	573	23.333	41.8848
765	cydC	MTT20193.1	30159	189	115	5	370	550	28	207	3.24e-07	51.2	573	30.159	32.9843
766	cydC	OLR37539.1	30159	189	115	5	370	550	28	207	3.24e-07	51.2	573	30.159	32.9843
767	cydC	CDN81131.1	30159	189	115	5	370	550	28	207	3.24e-07	51.2	573	30.159	32.9843
768	cydC	MTT18626.1	25112	223	131	9	356	551	19	232	5.64e-07	50.8	573	25.112	38.918
769	cydC	MTT18626.1	30542	203	110	8	336	531	317	495	2.59e-06	48.9	573	30.542	35.4276
770	cydC	OLR36992.1	25112	223	131	9	356	551	19	232	5.64e-07	50.8	573	25.112	38.918
771	cydC	OLR36992.1	30542	203	110	8	336	531	317	495	2.59e-06	48.9	573	30.542	35.4276
772	cydC	CDN81415.1	25112	223	131	9	356	551	19	232	5.64e-07	50.8	573	25.112	38.918
773	cydC	CDN81415.1	30542	203	110	8	336	531	317	495	2.59e-06	48.9	573	30.542	35.4276
774	cydC	MTT22165.1	28889	225	131	9	366	572	30	243	1.13e-06	48.9	573	28.889	39.267
775	cydC	OLR32798.1	28889	225	131	9	366	572	30	243	1.13e-06	48.9	573	28.889	39.267
776	cydC	CDN82658.1	28889	225	131	9	366	572	30	243	1.13e-06	48.9	573	28.889	39.267
777	cydC	MTT19248.1	28342	187	94	5	356	531	328	485	1.54e-05	46.2	573	28.342	32.6353
778	cydC	MTT19248.1	29091	165	103	4	356	506	17	181	0.000118	43.5	573	29.091	28.7958
779	cydC	OLR33698.1	28342	187	94	5	356	531	328	485	1.54e-05	46.2	573	28.342	32.6353
780	cydC	OLR33698.1	29091	165	103	4	356	506	17	181	0.000118	43.5	573	29.091	28.7958
781	cydC	CDN84094.1	28342	187	94	5	356	531	328	485	1.54e-05	46.2	573	28.342	32.6353
782	cydC	CDN84094.1	29091	165	103	4	356	506	17	181	0.000118	43.5	573	29.091	28.7958
783	cydC	MTT20138.1	23889	180	112	6	356	531	335	493	3.04e-05	45.4	573	23.889	31.4136
784	cydC	MTT20138.1	24876	201	127	8	352	531	13	210	0.002	39.7	573	24.876	35.0785
785	cydC	OLR37484.1	23889	180	112	6	356	531	335	493	3.04e-05	45.4	573	23.889	31.4136
786	cydC	OLR37484.1	24876	201	127	8	352	531	13	210	0.002	39.7	573	24.876	35.0785
787	cydC	CDN81187.1	23889	180	112	6	356	531	335	493	3.04e-05	45.4	573	23.889	31.4136
788	cydC	CDN81187.1	24876	201	127	8	352	531	13	210	0.002	39.7	573	24.876	35.0785
789	cydC	MTT19948.1	30732	205	101	9	369	548	31	219	0.000113	42.4	573	30.732	35.7766
790	cydC	OLR35120.1	30732	205	101	9	369	548	31	219	0.000113	42.4	573	30.732	35.7766
791	cydC	MTT18355.1	25896	251	149	9	339	564	2	240	0.000421	40.8	573	25.896	43.8045
792	cydC	OLR34533.1	25896	251	149	9	339	564	2	240	0.000421	40.8	573	25.896	43.8045
793	cydC	CDN82184.1	25896	251	149	9	339	564	2	240	0.000421	40.8	573	25.896	43.8045
794	cydC	OLR31199.1	31169	77	44	2	464	531	410	486	0.001	40.4	573	31.169	13.438
795	cydC	MTT17952.1	36250	80	46	3	459	533	813	892	0.002	39.3	573	36.25	13.9616
796	cydC	OLR36463.1	36250	80	46	3	459	533	813	892	0.002	39.3	573	36.25	13.9616
797	cydC	CDN84918.1	36250	80	46	3	459	533	813	892	0.002	39.3	573	36.25	13.9616
798	cydC	CDN83548.1	31169	77	50	1	475	548	96	172	0.2	32	573	31.169	13.438
799	cydC	MTT18988.1	26207	145	85	5	254	388	208	340	0.31	32.3	573	26.207	25.3054
800	cydC	OLR36580.1	26207	145	85	5	254	388	208	340	0.31	32.3	573	26.207	25.3054
801	cydC	CDN85293.1	26207	145	85	5	254	388	208	340	0.31	32.3	573	26.207	25.3054
802	cydC	CDN81430.1	30769	91	45	4	265	338	66	155	0.8	30	573	30.769	15.8813
803	cydC	MTT18640.1	30769	91	45	4	265	338	63	152	1	29.6	573	30.769	15.8813
804	cydC	OLR37003.1	30769	91	45	4	265	338	63	152	1	29.6	573	30.769	15.8813
805	cydC	MTT18063.1	29032	62	42	2	509	569	86	146	1.3	30	573	29.032	10.8202
806	cydC	OLR36355.1	29032	62	42	2	509	569	86	146	1.3	30	573	29.032	10.8202
807	cydC	CDN85037.1	29032	62	42	2	509	569	86	146	1.3	30	573	29.032	10.8202
808	cydC	MTT19730.1	33333	60	36	1	476	531	432	491	1.4	30.4	573	33.333	10.4712
809	cydC	OLR31803.1	33333	60	36	1	476	531	432	491	1.4	30.4	573	33.333	10.4712
810	cydC	CDN83254.1	33333	60	36	1	476	531	432	491	1.4	30.4	573	33.333	10.4712
811	cydC	OLR29873.1	26496	117	74	5	402	509	144	257	1.5	30	573	26.496	20.4188
812	cydC	MTT19485.1	52174	23	11	0	369	391	5	27	1.8	30	573	52.174	4.01396
813	cydC	OLR35518.1	52174	23	11	0	369	391	5	27	1.8	30	573	52.174	4.01396
814	cydC	CDN83158.1	52174	23	11	0	369	391	18	40	1.9	29.6	573	52.174	4.01396
815	cydC	MTT20168.1	36000	50	28	2	109	155	97	145	2.1	29.3	573	36	8.726
816	cydC	OLR37514.1	36000	50	28	2	109	155	97	145	2.1	29.3	573	36	8.726
817	cydC	CDN81156.1	36000	50	28	2	109	155	97	145	2.1	29.3	573	36	8.726
818	cydC	MTT18274.1	27586	87	55	3	463	546	38	119	2.2	29.6	573	27.586	15.1832
819	cydC	OLR34919.1	27586	87	55	3	463	546	38	119	2.2	29.6	573	27.586	15.1832
820	cydC	CDN82269.1	27586	87	55	3	463	546	38	119	2.2	29.6	573	27.586	15.1832
821	cydC	CDN82649.1	31915	47	27	2	340	382	74	119	2.4	29.3	573	31.915	8.20244
822	cydC	MTT22302.1	31915	47	27	2	340	382	15	60	2.6	28.5	573	31.915	8.20244
823	cydC	MTT17947.1	31818	66	38	1	351	416	153	211	5	28.5	573	31.818	11.5183
824	cydC	OLR36468.1	31818	66	38	1	351	416	153	211	5	28.5	573	31.818	11.5183
825	cydC	CDN84913.1	31818	66	38	1	351	416	153	211	5	28.5	573	31.818	11.5183
826	cydC	MTT18582.1	25000	48	36	0	366	413	144	191	8.3	27.7	573	25	8.37696
827	cydC	OLR36947.1	25000	48	36	0	366	413	144	191	8.3	27.7	573	25	8.37696
828	cydC	CDN81370.1	25000	48	36	0	366	413	144	191	8.3	27.7	573	25	8.37696
829	cydC	MTT18053.1	33333	42	28	0	64	105	245	286	8.6	27.3	573	33.333	7.32984
830	cydC	OLR36365.1	33333	42	28	0	64	105	245	286	8.6	27.3	573	33.333	7.32984
831	cydC	CDN85027.1	33333	42	28	0	64	105	245	286	8.6	27.3	573	33.333	7.32984
832	cydC	MTT19435.1	66667	18	6	0	369	386	11	28	9.5	27.3	573	66.667	3.14136
833	cydC	OLR35492.1	66667	18	6	0	369	386	11	28	9.5	27.3	573	66.667	3.14136
834	cydC	CDN83209.1	66667	18	6	0	369	386	11	28	9.5	27.3	573	66.667	3.14136
835	cydD	MTT20073.1	99320	588	4	0	1	588	1	588	0	1171	588	99.32	100
836	cydD	OLR37421.1	99320	588	4	0	1	588	1	588	0	1171	588	99.32	100
837	cydD	CDN81253.1	99320	588	4	0	1	588	1	588	0	1171	588	99.32	100
838	cydD	OLR32760.1	28273	527	350	9	69	586	44	551	2.48e-48	176	588	28.273	89.6259
839	cydD	CDN82599.1	28273	527	350	9	69	586	44	551	2.48e-48	176	588	28.273	89.6259
840	cydD	MTT21685.1	28843	527	347	10	69	586	74	581	2.89e-48	176	588	28.843	89.6259
841	cydD	MTT18598.1	26852	432	295	9	156	580	158	575	2.42e-44	164	588	26.852	73.4694
842	cydD	OLR36964.1	26852	432	295	9	156	580	158	575	2.42e-44	164	588	26.852	73.4694
843	cydD	CDN81387.1	26852	432	295	9	156	580	158	575	2.42e-44	164	588	26.852	73.4694
844	cydD	MTT19077.1	27291	502	341	7	87	577	80	568	3.52e-41	155	588	27.291	85.3741
845	cydD	OLR37816.1	27291	502	341	7	87	577	80	568	3.52e-41	155	588	27.291	85.3741
846	cydD	CDN80839.1	27291	502	341	7	87	577	80	568	3.52e-41	155	588	27.291	85.3741
847	cydD	MTT21686.1	28283	495	314	14	98	580	111	576	1.63e-39	151	588	28.283	84.1837
848	cydD	OLR32759.1	28283	495	314	14	98	580	111	576	1.63e-39	151	588	28.283	84.1837
849	cydD	CDN82598.1	28283	495	314	14	98	580	111	576	1.63e-39	151	588	28.283	84.1837
850	cydD	MTT20074.1	27912	498	323	15	92	577	93	566	4.18e-36	141	588	27.912	84.6939
851	cydD	OLR37422.1	27912	498	323	15	92	577	93	566	4.18e-36	141	588	27.912	84.6939
852	cydD	CDN81252.1	27912	498	323	15	92	577	93	566	4.18e-36	141	588	27.912	84.6939
853	cydD	MTT19078.1	34545	220	143	1	369	587	355	574	6.32e-32	129	588	34.545	37.415
854	cydD	OLR37817.1	34545	220	143	1	369	587	355	574	6.32e-32	129	588	34.545	37.415
855	cydD	CDN80838.1	34545	220	143	1	369	587	355	574	6.32e-32	129	588	34.545	37.415
856	cydD	CDN80442.1	32243	214	123	7	368	570	22	224	3.75e-18	82.8	588	32.243	36.3946
857	cydD	MTT18860.1	32243	214	123	7	368	570	15	217	4.62e-18	82.4	588	32.243	36.3946
858	cydD	OLR36707.1	32243	214	123	7	368	570	15	217	4.62e-18	82.4	588	32.243	36.3946
859	cydD	MTT19034.1	30928	194	121	5	369	557	26	211	3.3e-17	79.7	588	30.928	32.9932
860	cydD	OLR37773.1	30928	194	121	5	369	557	26	211	3.3e-17	79.7	588	30.928	32.9932
861	cydD	CDN80884.1	30928	194	121	5	369	557	26	211	3.3e-17	79.7	588	30.928	32.9932
862	cydD	MTT22225.1	30542	203	122	8	369	562	29	221	2.5e-15	74.3	588	30.542	34.5238
863	cydD	OLR29021.1	30542	203	122	8	369	562	29	221	2.5e-15	74.3	588	30.542	34.5238
864	cydD	CDN85442.1	30542	203	122	8	369	562	29	221	2.5e-15	74.3	588	30.542	34.5238
865	cydD	MTT20651.1	27935	247	162	9	332	572	6	242	3.17e-15	77	588	27.935	42.0068
866	cydD	MTT20651.1	21901	242	121	6	360	561	279	492	5.5e-06	47.8	588	21.901	41.1565
867	cydD	OLR37714.1	27935	247	162	9	332	572	6	242	3.17e-15	77	588	27.935	42.0068
868	cydD	OLR37714.1	21901	242	121	6	360	561	279	492	5.5e-06	47.8	588	21.901	41.1565
869	cydD	CDN80947.1	27935	247	162	9	332	572	6	242	3.17e-15	77	588	27.935	42.0068
870	cydD	CDN80947.1	21901	242	121	6	360	561	279	492	5.5e-06	47.8	588	21.901	41.1565
871	cydD	MTT21158.1	31100	209	125	6	373	570	28	228	5.52e-15	75.1	588	31.1	35.5442
872	cydD	OLR36849.1	31100	209	125	6	373	570	28	228	5.52e-15	75.1	588	31.1	35.5442
873	cydD	CDN80591.1	31100	209	125	6	373	570	28	228	5.52e-15	75.1	588	31.1	35.5442
874	cydD	MTT22121.1	31604	212	129	8	361	565	12	214	5.83e-15	75.1	588	31.604	36.0544
875	cydD	MTT20465.1	30222	225	123	11	362	565	15	226	6.43e-15	73.6	588	30.222	38.2653
876	cydD	OLR34220.1	30222	225	123	11	362	565	15	226	6.43e-15	73.6	588	30.222	38.2653
877	cydD	CDN82478.1	30222	225	123	11	362	565	15	226	6.43e-15	73.6	588	30.222	38.2653
878	cydD	MTT21251.1	30660	212	119	9	369	565	31	229	6.45e-15	73.6	588	30.66	36.0544
879	cydD	OLR34682.1	30660	212	119	9	369	565	31	229	6.45e-15	73.6	588	30.66	36.0544
880	cydD	CDN84016.1	30660	212	119	9	369	565	31	229	6.45e-15	73.6	588	30.66	36.0544
881	cydD	MTT20080.1	30882	204	123	7	369	562	27	222	9.32e-15	75.9	588	30.882	34.6939
882	cydD	OLR37428.1	30882	204	123	7	369	562	27	222	9.32e-15	75.9	588	30.882	34.6939
883	cydD	CDN81246.1	30882	204	123	7	369	562	27	222	9.32e-15	75.9	588	30.882	34.6939
884	cydD	MTT18778.1	32110	218	122	8	369	574	28	231	2.01e-14	71.6	588	32.11	37.0748
885	cydD	OLR37138.1	32110	218	122	8	369	574	28	231	2.01e-14	71.6	588	32.11	37.0748
886	cydD	CDN81575.1	32110	218	122	8	369	574	28	231	2.01e-14	71.6	588	32.11	37.0748
887	cydD	MTT19155.1	33180	217	114	9	362	564	13	212	4.31e-14	71.2	588	33.18	36.9048
888	cydD	OLR37895.1	33180	217	114	9	362	564	13	212	4.31e-14	71.2	588	33.18	36.9048
889	cydD	CDN80756.1	33180	217	114	9	362	564	13	212	4.31e-14	71.2	588	33.18	36.9048
890	cydD	OLR29449.1	31132	212	130	8	361	565	12	214	4.78e-14	72.4	588	31.132	36.0544
891	cydD	MTT18787.1	32093	215	134	7	361	570	28	235	1.41e-13	71.2	588	32.093	36.5646
892	cydD	OLR37147.1	32093	215	134	7	361	570	28	235	1.41e-13	71.2	588	32.093	36.5646
893	cydD	CDN81584.1	32093	215	134	7	361	570	28	235	1.41e-13	71.2	588	32.093	36.5646
894	cydD	MTT20095.1	31604	212	121	8	369	565	21	223	1.92e-13	68.9	588	31.604	36.0544
895	cydD	OLR37442.1	31604	212	121	8	369	565	21	223	1.92e-13	68.9	588	31.604	36.0544
896	cydD	CDN81230.1	31604	212	121	8	369	565	54	256	2.16e-13	69.3	588	31.604	36.0544
897	cydD	MTT20840.1	27074	229	142	7	350	565	7	223	5.11e-13	68.2	588	27.074	38.9456
898	cydD	OLR37213.1	27074	229	142	7	350	565	7	223	5.11e-13	68.2	588	27.074	38.9456
899	cydD	MTT18617.1	31553	206	104	6	369	561	30	211	5.22e-13	67.8	588	31.553	35.034
900	cydD	OLR36983.1	31553	206	104	6	369	561	30	211	5.22e-13	67.8	588	31.553	35.034
901	cydD	CDN81406.1	31553	206	104	6	369	561	30	211	5.22e-13	67.8	588	31.553	35.034
902	cydD	CDN81652.1	27074	229	142	7	350	565	6	222	5.38e-13	68.2	588	27.074	38.9456
903	cydD	MTT21550.1	32000	200	120	7	369	561	23	213	6.67e-13	68.6	588	32	34.0136
904	cydD	OLR35306.1	32000	200	120	7	369	561	23	213	6.67e-13	68.6	588	32	34.0136
905	cydD	CDN81999.1	32000	200	120	7	369	561	23	213	6.67e-13	68.6	588	32	34.0136
906	cydD	MTT22073.1	30667	225	136	7	358	565	30	251	7.86e-13	68.6	588	30.667	38.2653
907	cydD	OLR37335.1	30667	225	136	7	358	565	30	251	7.86e-13	68.6	588	30.667	38.2653
908	cydD	CDN81791.1	30667	225	136	7	358	565	30	251	7.86e-13	68.6	588	30.667	38.2653
909	cydD	MTT17682.1	31416	226	120	9	369	573	305	516	8.1e-13	69.3	588	31.416	38.4354
910	cydD	MTT17682.1	28326	233	132	9	363	570	22	244	1.92e-10	62	588	28.326	39.6259
911	cydD	OLR36057.1	31416	226	120	9	369	573	305	516	8.1e-13	69.3	588	31.416	38.4354
912	cydD	OLR36057.1	28326	233	132	9	363	570	22	244	1.92e-10	62	588	28.326	39.6259
913	cydD	CDN82859.1	31416	226	120	9	369	573	305	516	8.1e-13	69.3	588	31.416	38.4354
914	cydD	CDN82859.1	28326	233	132	9	363	570	22	244	1.92e-10	62	588	28.326	39.6259
915	cydD	MTT20104.1	29839	248	146	10	359	587	28	266	1.18e-12	68.2	588	29.839	42.1769
916	cydD	OLR37451.1	29839	248	146	10	359	587	28	266	1.18e-12	68.2	588	29.839	42.1769
917	cydD	MTT20277.1	27442	215	130	7	363	562	22	225	1.92e-12	66.2	588	27.442	36.5646
918	cydD	OLR35643.1	27442	215	130	7	363	562	22	225	1.92e-12	66.2	588	27.442	36.5646
919	cydD	CDN83777.1	27442	215	130	7	363	562	22	225	1.92e-12	66.2	588	27.442	36.5646
920	cydD	CDN81221.1	29482	251	149	10	356	587	52	293	2.05e-12	67.8	588	29.482	42.6871
921	cydD	MTT22156.1	29048	210	133	8	369	572	30	229	2.16e-12	68.2	588	29.048	35.7143
922	cydD	MTT22156.1	26000	200	137	7	369	559	282	479	2.24e-05	45.8	588	26	34.0136
923	cydD	MTT19556.1	32836	201	121	9	369	561	21	215	2.32e-12	67.4	588	32.836	34.1837
924	cydD	OLR35375.1	32836	201	121	9	369	561	21	215	2.32e-12	67.4	588	32.836	34.1837
925	cydD	CDN83086.1	32836	201	121	9	369	561	21	215	2.32e-12	67.4	588	32.836	34.1837
926	cydD	MTT21206.1	29954	217	140	7	362	570	23	235	2.68e-12	65.9	588	29.954	36.9048
927	cydD	OLR36802.1	29954	217	140	7	362	570	23	235	2.68e-12	65.9	588	29.954	36.9048
928	cydD	CDN80540.1	29954	217	140	7	362	570	23	235	2.68e-12	65.9	588	29.954	36.9048
929	cydD	MTT20723.1	30890	191	116	8	382	563	33	216	4.28e-12	65.1	588	30.89	32.483
930	cydD	OLR37642.1	30890	191	116	8	382	563	33	216	4.28e-12	65.1	588	30.89	32.483
931	cydD	CDN81023.1	30890	191	116	8	382	563	33	216	4.28e-12	65.1	588	30.89	32.483
932	cydD	MTT20393.1	31019	216	129	9	362	563	14	223	4.58e-12	67	588	31.019	36.7347
933	cydD	MTT20393.1	23605	233	152	10	347	561	253	477	0.002	39.3	588	23.605	39.6259
934	cydD	OLR34149.1	31019	216	129	9	362	563	14	223	4.58e-12	67	588	31.019	36.7347
935	cydD	OLR34149.1	23605	233	152	10	347	561	253	477	0.002	39.3	588	23.605	39.6259
936	cydD	CDN82403.1	31019	216	129	9	362	563	29	238	5.29e-12	67	588	31.019	36.7347
937	cydD	CDN82403.1	23605	233	152	10	347	561	268	492	0.002	39.3	588	23.605	39.6259
938	cydD	MTT19352.1	31414	191	104	9	369	545	21	198	5.63e-12	64.3	588	31.414	32.483
939	cydD	OLR32872.1	31414	191	104	9	369	545	21	198	5.63e-12	64.3	588	31.414	32.483
940	cydD	CDN84202.1	31414	191	104	9	369	545	21	198	5.63e-12	64.3	588	31.414	32.483
941	cydD	MTT17631.1	29952	207	126	9	369	565	20	217	6.82e-12	65.1	588	29.952	35.2041
942	cydD	OLR36006.1	29952	207	126	9	369	565	20	217	6.82e-12	65.1	588	29.952	35.2041
943	cydD	CDN82807.1	29952	207	126	9	369	565	20	217	6.82e-12	65.1	588	29.952	35.2041
944	cydD	MTT18328.1	29817	218	131	7	364	570	14	220	7.97e-12	64.3	588	29.817	37.0748
945	cydD	OLR34862.1	29817	218	131	7	364	570	14	220	7.97e-12	64.3	588	29.817	37.0748
946	cydD	CDN82213.1	29817	218	131	7	364	570	14	220	7.97e-12	64.3	588	29.817	37.0748
947	cydD	OLR35555.1	27778	198	120	8	369	562	24	202	2.16e-11	62.4	588	27.778	33.6735
948	cydD	MTT19804.1	29268	205	128	8	369	562	23	221	3.73e-11	64.3	588	29.268	34.8639
949	cydD	MTT19804.1	24519	208	138	11	369	561	280	483	0.000206	42.7	588	24.519	35.3741
950	cydD	OLR35920.1	29268	205	128	8	369	562	23	221	3.73e-11	64.3	588	29.268	34.8639
951	cydD	OLR35920.1	24519	208	138	11	369	561	280	483	0.000206	42.7	588	24.519	35.3741
952	cydD	CDN84323.1	29268	205	128	8	369	562	23	221	3.73e-11	64.3	588	29.268	34.8639
953	cydD	CDN84323.1	24519	208	138	11	369	561	280	483	0.000206	42.7	588	24.519	35.3741
954	cydD	MTT20150.1	28019	207	131	8	369	565	20	218	4.2e-11	62	588	28.019	35.2041
955	cydD	OLR37496.1	28019	207	131	8	369	565	20	218	4.2e-11	62	588	28.019	35.2041
956	cydD	CDN81176.1	28019	207	131	8	369	565	20	218	4.2e-11	62	588	28.019	35.2041
957	cydD	MTT17916.1	29108	213	127	7	369	570	22	221	4.38e-11	63.2	588	29.108	36.2245
958	cydD	OLR36498.1	29108	213	127	7	369	570	22	221	4.38e-11	63.2	588	29.108	36.2245
959	cydD	CDN84880.1	29108	213	127	7	369	570	52	251	6.98e-11	62.8	588	29.108	36.2245
960	cydD	MTT20911.1	31606	193	113	10	380	564	34	215	7.61e-11	62.4	588	31.606	32.8231
961	cydD	OLR35239.1	31606	193	113	10	380	564	34	215	7.61e-11	62.4	588	31.606	32.8231
962	cydD	CDN81930.1	31606	193	113	10	380	564	34	215	7.61e-11	62.4	588	31.606	32.8231
963	cydD	CDN84944.1	27823	248	151	11	353	581	29	267	8.72e-11	61.6	588	27.823	42.1769
964	cydD	CDN83688.1	27835	194	117	8	369	558	24	198	8.79e-11	60.8	588	27.835	32.9932
965	cydD	MTT19029.1	30542	203	116	7	376	564	36	227	9.34e-11	60.8	588	30.542	34.5238
966	cydD	OLR37770.1	30542	203	116	7	376	564	36	227	9.34e-11	60.8	588	30.542	34.5238
967	cydD	CDN80889.1	30542	203	116	7	376	564	36	227	9.34e-11	60.8	588	30.542	34.5238
968	cydD	MTT17975.1	32314	229	110	10	350	558	4	207	9.68e-11	60.8	588	32.314	38.9456
969	cydD	OLR36441.1	32314	229	110	10	350	558	4	207	9.68e-11	60.8	588	32.314	38.9456
970	cydD	CDN84943.1	32314	229	110	10	350	558	4	207	9.68e-11	60.8	588	32.314	38.9456
971	cydD	MTT17976.1	27823	248	151	11	353	581	9	247	1.03e-10	61.2	588	27.823	42.1769
972	cydD	OLR36440.1	27823	248	151	11	353	581	9	247	1.03e-10	61.2	588	27.823	42.1769
973	cydD	MTT22255.1	28814	236	152	8	348	574	1	229	1.15e-10	60.8	588	28.814	40.1361
974	cydD	OLR29160.1	28814	236	152	8	348	574	1	229	1.15e-10	60.8	588	28.814	40.1361
975	cydD	CDN85185.1	28814	236	152	8	348	574	1	229	1.15e-10	60.8	588	28.814	40.1361
[truncated: 6,585 more rows]
