# Supplementary material for: In Silico Prediction and Prioritisation of Novel Selective Antimicrobial Drug Targets in Escherichia Coli
Source: Research Square preprint supplement (doi:10.21203/rs.3.rs-131560/v1), 2021-01-04
Supplement: Supplementary file 2 [file 95ebfdce04f614091af3b8c8.xlsx]

## Sheet: Over cut-off
	% alignment	% id	bitscore	evalue	gapopen	length	mismatch	pident	prot length	qend	qseqid	qstart	send	sseqid	sstart
224	53.8462	48.81	72.8	1.16e-15	1	84	36	48810	156	156	accB	73	144	WP_028909937.1	68
225	83.3333	40	68.9	2.88e-14	4	130	63	40000	156	156	accB	34	142	WP_008822432.1	21
226	86.5385	34.815	68.9	3.24e-14	4	135	74	34815	156	156	accB	28	142	WP_007574271.1	16
227	60.8974	45.263	68.6	4.18e-14	2	95	43	45263	156	156	accB	64	141	WP_021589713.1	54
228	59.6154	46.237	68.6	4.37e-14	2	93	42	46237	156	156	accB	65	142	WP_091825771.1	57
229	75.641	35.593	68.2	5.41e-14	2	118	68	35593	156	156	accB	40	143	WP_025799767.1	33
230	53.8462	47.619	67.4	1.09e-13	1	84	37	47619	156	156	accB	73	142	WP_007366287.1	66
231	50	44.872	66.6	1.11e-13	1	78	36	44872	156	156	accB	79	105	RKW53437.1	35
232	88.4615	34.783	67.4	1.22e-13	3	138	65	34783	156	156	accB	31	143	MBA7488395.1	19
233	83.3333	39.231	67	1.39e-13	3	130	54	39231	156	156	accB	39	141	WP_006846890.1	25
234	64.1026	43	67.4	1.39e-13	2	100	43	43000	156	156	accB	57	142	WP_130828990.1	57
235	54.4872	44.706	67.4	1.39e-13	1	85	40	44706	156	156	accB	72	142	WP_077195867.1	65
236	53.8462	47.619	67	1.67e-13	1	84	37	47619	156	156	accB	73	142	WP_050696286.1	66
237	75	39.316	67	1.67e-13	2	117	63	39316	156	156	accB	40	142	WP_096405091.1	34
238	53.8462	47.619	67	1.7e-13	1	84	37	47619	156	156	accB	73	142	WP_013265101.1	66
239	53.8462	47.619	67	1.81e-13	1	84	37	47619	156	156	accB	73	142	WP_089366813.1	66
240	74.359	39.655	67	1.81e-13	2	116	62	39655	156	156	accB	41	142	WP_100020796.1	35
241	74.359	39.655	66.6	2.02e-13	2	116	62	39655	156	156	accB	41	142	WP_061869441.1	35
242	74.359	39.655	66.6	2.08e-13	2	116	62	39655	156	156	accB	41	142	WP_045167136.1	35
243	53.8462	47.619	66.6	2.31e-13	1	84	37	47619	156	156	accB	73	142	WP_036865055.1	66
244	74.359	39.655	66.6	2.34e-13	2	116	62	39655	156	156	accB	41	142	WP_099891347.1	35
245	74.359	39.655	66.6	2.49e-13	2	116	62	39655	156	156	accB	41	142	WP_124139862.1	35
246	61.5385	43.75	66.6	2.49e-13	3	96	44	43750	156	156	accB	61	143	HCJ47256.1	58
247	67.3077	40.952	66.2	2.83e-13	2	105	48	40952	156	156	accB	52	141	WP_004370948.1	51
248	53.8462	47.619	66.2	2.92e-13	1	84	37	47619	156	156	accB	73	142	WP_004359501.1	66
249	74.359	39.655	66.2	3.08e-13	2	116	62	39655	156	156	accB	41	142	WP_088437822.1	35
250	54.4872	48.235	66.2	3.18e-13	2	85	36	48235	156	156	accB	72	142	WP_099983346.1	66
251	67.3077	40.952	66.2	3.25e-13	2	105	48	40952	156	156	accB	52	141	WP_004376117.1	51
252	66.6667	40.385	66.2	3.39e-13	2	104	49	40385	156	156	accB	53	142	WP_004366216.1	52
253	62.8205	42.857	66.2	3.43e-13	2	98	42	42857	156	156	accB	59	143	WP_006952473.1	60
254	83.3333	38.462	65.9	3.46e-13	3	130	55	38462	156	156	accB	39	130	MBD9015838.1	14
255	67.3077	40.952	66.2	3.61e-13	2	105	48	40952	156	156	accB	52	141	WP_070668043.1	51
256	53.8462	47.619	66.2	3.69e-13	1	84	37	47619	156	156	accB	73	142	WP_036869039.1	66
257	53.8462	46.429	66.2	3.77e-13	1	84	38	46429	156	156	accB	73	142	WP_025839864.1	66
258	100	32.051	65.9	3.98e-13	5	156	85	32051	156	156	accB	1	142	WP_006044882.1	8
259	66.6667	40.385	65.9	4.15e-13	2	104	49	40385	156	156	accB	53	142	WP_004362717.1	52
260	100	33.333	65.9	4.19e-13	5	156	83	33333	156	156	accB	1	142	WP_024999232.1	8
261	54.4872	48.235	65.9	4.42e-13	2	85	36	48235	156	156	accB	72	142	WP_100015902.1	66
262	54.4872	48.235	65.9	4.61e-13	2	85	36	48235	156	156	accB	72	142	WP_097648364.1	66
263	83.3333	38.462	65.9	4.86e-13	3	130	55	38462	156	156	accB	39	141	WP_022120280.1	25
264	50	44.872	65.9	4.92e-13	1	78	36	44872	156	156	accB	79	142	WP_004355351.1	72
265	54.4872	48.235	65.9	4.92e-13	2	85	36	48235	156	156	accB	72	142	WP_097655881.1	66
266	54.4872	44.706	65.9	4.97e-13	2	85	39	44706	156	156	accB	72	141	WP_028896321.1	65
267	62.1795	40.206	65.9	5.22e-13	1	97	51	40206	156	155	accB	59	154	WP_144150812.1	65
268	66.6667	40.385	65.5	5.52e-13	2	104	49	40385	156	156	accB	53	142	WP_023926102.1	52
269	66.6667	40.385	65.5	5.58e-13	2	104	49	40385	156	156	accB	53	142	WP_100189176.1	52
270	48.7179	47.368	65.5	6.14e-13	1	76	33	47368	156	156	accB	81	142	WP_100370319.1	74
271	42.3077	56.061	65.5	6.54e-13	1	66	27	56061	156	156	accB	93	142	WP_097550946.1	77
272	54.4872	47.059	65.5	7.28e-13	2	85	37	47059	156	156	accB	72	142	WP_099995779.1	66
273	67.3077	40	65.5	7.51e-13	2	105	49	40000	156	156	accB	52	141	WP_018920352.1	51
274	83.3333	37.692	65.1	7.59e-13	3	130	56	37692	156	156	accB	39	141	WP_022111025.1	25
275	65.3846	40.196	65.1	8.18e-13	2	102	47	40196	156	156	accB	55	143	CCY80474.1	56
276	55.1282	45.349	65.1	8.26e-13	1	86	40	45349	156	156	accB	71	142	WP_025001737.1	64
277	78.8462	39.837	65.1	8.43e-13	4	123	62	39837	156	156	accB	39	140	WP_022252631.1	25
278	60.2564	42.553	65.1	9.09e-13	2	94	46	42553	156	156	accB	64	141	WP_021826523.1	55
279	34.6154	61.111	65.1	9.19e-13	0	54	21	61111	156	156	accB	103	143	WP_091958860.1	90
280	74.359	38.793	65.1	1.05e-12	2	116	63	38793	156	156	accB	41	142	WP_100022378.1	35
281	73.7179	39.13	64.7	1.15e-12	2	115	62	39130	156	155	accB	41	141	WP_100014289.1	35
282	53.8462	45.238	64.7	1.24e-12	1	84	39	45238	156	156	accB	73	142	WP_120175469.1	66
283	53.8462	46.429	64.7	1.26e-12	1	84	38	46429	156	156	accB	73	142	WP_025790498.1	66
284	78.2051	36.885	64.7	1.32e-12	3	122	59	36885	156	156	accB	40	141	WP_106812712.1	33
285	75	36.752	64.7	1.32e-12	2	117	66	36752	156	156	accB	40	142	WP_028901856.1	34
286	60.2564	42.553	64.7	1.39e-12	2	94	46	42553	156	156	accB	64	141	WP_007133825.1	55
287	54.4872	45.882	64.3	1.61e-12	2	85	38	45882	156	156	accB	73	142	HAT62519.1	65
288	65.3846	38.235	64.3	1.63e-12	2	102	49	38235	156	156	accB	55	143	WP_021854128.1	56
289	85.2564	33.835	64.3	1.7e-12	3	133	73	33835	156	156	accB	31	143	MBB1539618.1	19
290	85.2564	33.835	64.3	1.7e-12	3	133	73	33835	156	156	accB	31	143	MBB1539618.1	19
291	83.3333	37.692	64.3	1.72e-12	3	130	56	37692	156	156	accB	39	141	WP_153137704.1	25
292	47.4359	48.649	64.3	1.79e-12	1	74	31	48649	156	156	accB	83	142	WP_107624449.1	76
293	50	43.59	64.3	1.83e-12	1	78	37	43590	156	156	accB	79	141	WP_107582552.1	71
294	34.6154	59.259	64.3	1.93e-12	0	54	22	59259	156	156	accB	103	143	WP_004379730.1	90
295	53.8462	46.429	64.3	1.99e-12	1	84	38	46429	156	156	accB	73	142	WP_009010582.1	66
296	53.8462	44.048	64.3	2.03e-12	1	84	40	44048	156	156	accB	73	142	WP_018462279.1	66
297	50	47.436	64.3	2.05e-12	1	78	34	47436	156	156	accB	79	142	WP_021671540.1	72
298	85.2564	33.835	64.3	2.17e-12	3	133	73	33835	156	156	accB	31	143	MBB1529651.1	19
299	48.7179	46.053	63.9	2.19e-12	1	76	34	46053	156	156	accB	81	142	WP_060941506.1	74
300	68.5897	36.449	63.9	2.28e-12	3	107	53	36449	156	156	accB	51	140	WP_004350056.1	48
301	47.4359	48.649	63.9	2.41e-12	1	74	31	48649	156	156	accB	83	142	WP_004353503.1	76
302	47.4359	48.649	63.9	2.41e-12	1	74	31	48649	156	156	accB	83	142	WP_118866831.1	76
303	65.3846	37.255	63.9	2.46e-12	2	102	50	37255	156	156	accB	55	143	WP_053398444.1	56
304	50	46.154	63.9	2.62e-12	1	78	35	46154	156	156	accB	79	141	WP_019035705.1	71
305	74.359	38.793	63.9	2.85e-12	2	116	63	38793	156	156	accB	41	142	WP_099976433.1	35
306	50	46.154	63.9	2.88e-12	1	78	35	46154	156	156	accB	79	141	WP_008450293.1	71
307	79.4872	36.29	63.9	2.91e-12	3	124	66	36290	156	156	accB	39	142	WP_107621575.1	26
308	74.359	38.793	63.5	3.41e-12	2	116	63	38793	156	156	accB	41	142	WP_028906285.1	35
309	68.5897	36.449	63.5	3.49e-12	3	107	53	36449	156	156	accB	51	140	WP_023056745.1	48
310	66.6667	42.308	63.2	4.44e-12	3	104	47	42308	156	156	accB	53	142	WP_014709991.1	52
311	65.3846	41.176	63.2	4.59e-12	3	102	49	41176	156	156	accB	55	142	MBD8997519.1	52
312	34.6154	61.111	63.2	4.59e-12	0	54	21	61111	156	156	accB	103	141	WP_006282295.1	88
313	68.5897	36.449	63.2	4.59e-12	3	107	53	36449	156	156	accB	51	140	WP_102696922.1	48
314	67.3077	39.048	63.2	4.69e-12	2	105	51	39048	156	156	accB	52	141	MBD9298896.1	50
315	34.6154	61.111	63.2	4.69e-12	0	54	21	61111	156	156	accB	103	141	WP_027453724.1	88
316	50	44.872	63.2	4.69e-12	1	78	36	44872	156	156	accB	79	141	WP_036861971.1	71
317	65.3846	42.157	63.2	4.79e-12	2	102	44	42157	156	156	accB	55	142	WP_021583960.1	56
318	50	44.872	63.2	4.99e-12	1	78	36	44872	156	156	accB	79	141	WP_004338669.1	71
319	60.8974	42.105	63.2	5.43e-12	1	95	48	42105	156	156	accB	62	142	WP_024991352.1	55
320	34.6154	59.259	62.4	8.38e-12	0	54	22	59259	156	156	accB	103	141	WP_024989215.1	88
321	34.6154	59.259	62.4	8.74e-12	0	54	22	59259	156	156	accB	103	142	WP_004383626.1	89
322	47.4359	47.297	62.4	9.31e-12	1	74	32	47297	156	156	accB	83	143	WP_028898690.1	77
323	34.6154	57.407	62.4	9.4e-12	0	54	23	57407	156	156	accB	103	143	WP_078805753.1	90
324	53.8462	44.048	62.4	9.93e-12	1	84	40	44048	156	156	accB	73	140	WP_004342360.1	64
325	42.3077	53.03	62.4	1.05e-11	1	66	29	53030	156	156	accB	93	141	MBD9042342.1	76
326	53.8462	44.048	62.4	1.15e-11	1	84	40	44048	156	156	accB	73	142	EFU29480.1	66
327	42.3077	53.03	62	1.21e-11	1	66	29	53030	156	156	accB	93	140	MBD9200535.1	75
328	50	43.59	62	1.26e-11	1	78	37	43590	156	156	accB	79	145	WP_007174226.1	75
329	67.3077	39.048	62	1.28e-11	2	105	51	39048	156	156	accB	52	141	HBF06106.1	50
330	75.641	33.898	62	1.4e-11	2	118	70	33898	156	156	accB	40	143	WP_009161510.1	33
331	56.4103	44.318	62	1.45e-11	2	88	45	44318	156	156	accB	73	141	WP_094879567.1	54
332	60.8974	41.053	61.6	1.72e-11	1	95	49	41053	156	156	accB	62	142	WP_025065800.1	55
333	55.1282	44.186	61.6	1.72e-11	2	86	40	44186	156	156	accB	72	142	CCZ12123.1	64
334	34.6154	57.407	61.6	1.99e-11	0	54	23	57407	156	156	accB	103	140	WP_025003164.1	87
335	57.6923	41.111	61.6	2.12e-11	2	90	45	41111	156	156	accB	67	141	WP_094391599.1	60
336	55.1282	44.186	61.6	2.17e-11	2	86	40	44186	156	156	accB	72	142	MBD9229103.1	64
337	79.4872	35.484	61.2	2.64e-11	4	124	60	35484	156	156	accB	40	143	WP_024991139.1	33
338	34.6154	57.407	61.2	2.64e-11	0	54	23	57407	156	156	accB	103	143	WP_044079996.1	90
339	79.4872	35.484	61.2	2.84e-11	4	124	60	35484	156	156	accB	40	144	EFM00938.1	34
340	34.6154	55.556	60.8	3.34e-11	0	54	24	55556	156	156	accB	103	141	WP_008121813.1	88
341	34.6154	55.556	60.8	3.63e-11	0	54	24	55556	156	156	accB	103	141	WP_036927132.1	88
342	50	43.59	60.8	3.95e-11	1	78	37	43590	156	156	accB	79	141	WP_008566498.1	71
343	67.3077	37.143	60.8	4.25e-11	2	105	53	37143	156	156	accB	52	141	WP_036895936.1	50
344	34.6154	55.556	60.5	4.62e-11	0	54	24	55556	156	156	accB	103	143	WP_022317090.1	90
345	47.4359	45.946	60.5	4.67e-11	1	74	33	45946	156	156	accB	83	143	CCX66849.1	77
346	34.6154	53.704	58.9	4.77e-11	0	54	25	53704	156	156	accB	103	76	RKW53524.1	23
347	55.1282	39.535	60.5	5.42e-11	1	86	45	39535	156	156	accB	71	141	WP_094433912.1	63
348	89.1026	33.094	60.8	5.49e-11	3	139	75	33094	156	156	accB	23	166	WP_153097357.1	41
349	50	43.59	60.5	5.89e-11	1	78	37	43590	156	156	accB	79	142	WP_092111216.1	72
350	63.4615	40.404	60.8	6.13e-11	2	99	50	40404	156	156	accB	58	167	MBD9015759.1	78
351	60.8974	40	60.5	6.33e-11	3	95	47	40000	156	146	accB	55	146	WP_172173219.1	59
352	53.8462	41.667	60.1	6.97e-11	1	84	42	41667	156	156	accB	73	142	WP_110370342.1	66
353	53.8462	40.476	60.1	6.97e-11	1	84	43	40476	156	156	accB	73	142	WP_009235345.1	66
354	56.4103	42.045	60.1	7.82e-11	1	88	44	42045	156	156	accB	69	143	WP_009227725.1	63
355	49.359	44.156	60.1	7.83e-11	1	77	36	44156	156	155	accB	79	148	WP_094386461.1	79
356	34.6154	53.704	59.7	1.06e-10	0	54	25	53704	156	156	accB	103	141	WP_025072714.1	88
357	50	42.308	59.7	1.12e-10	1	78	38	42308	156	156	accB	79	141	WP_022311084.1	71
358	34.6154	53.704	59.7	1.17e-10	0	54	25	53704	156	156	accB	103	140	WP_172345152.1	87
359	56.4103	36.364	59.7	1.17e-10	1	88	49	36364	156	146	accB	59	141	WP_172273988.1	61
360	34.6154	57.407	59.7	1.18e-10	0	54	23	57407	156	156	accB	103	142	WP_094399944.1	89
361	50	43.59	59.7	1.23e-10	1	78	37	43590	156	156	accB	79	143	WP_018361379.1	73
362	50	43.59	58.9	2.29e-10	1	78	37	43590	156	156	accB	79	141	WP_094381168.1	71
363	62.1795	40.206	58.5	2.67e-10	3	97	50	40206	156	156	accB	61	143	WP_126677820.1	54
364	34.6154	55.556	58.5	3e-10	0	54	24	55556	156	156	accB	103	143	WP_044072201.1	90
365	34.6154	55.556	58.5	3e-10	0	54	24	55556	156	156	accB	103	143	WP_044064639.1	90
366	34.6154	55.556	58.5	3e-10	0	54	24	55556	156	156	accB	103	143	WP_044064639.1	90
367	58.3333	41.758	58.5	3.06e-10	2	91	45	41758	156	146	accB	56	144	WP_104370355.1	62
368	50	41.026	58.5	3.22e-10	1	78	39	41026	156	156	accB	79	145	WP_116616745.1	75
369	50	41.026	58.5	3.22e-10	1	78	39	41026	156	156	accB	79	145	WP_116616745.1	75
370	64.1026	37	58.5	3.43e-10	2	100	46	37000	156	156	accB	57	145	WP_036891719.1	63
371	34.6154	55.556	58.2	3.52e-10	0	54	24	55556	156	156	accB	103	141	CDA93885.1	88
372	63.4615	40.404	58.5	3.87e-10	2	99	50	40404	156	156	accB	58	165	WP_153090028.1	76
373	34.6154	55.556	58.2	3.94e-10	0	54	24	55556	156	156	accB	103	143	WP_125234569.1	90
374	34.6154	53.704	57.8	4.77e-10	0	54	25	53704	156	156	accB	103	142	WP_009229804.1	89
375	54.4872	41.176	57.8	5.07e-10	1	85	43	41176	156	156	accB	72	143	HBN47211.1	66
376	34.6154	53.704	57.8	5.64e-10	0	54	25	53704	156	156	accB	103	142	WP_019188423.1	89
377	34.6154	53.704	57.8	5.7e-10	0	54	25	53704	156	156	accB	103	142	WP_070722706.1	89
378	59.6154	36.559	57.8	5.75e-10	2	93	51	36559	156	156	accB	64	143	CCY64221.1	59
379	34.6154	53.704	57.4	7.4e-10	0	54	25	53704	156	156	accB	103	142	HCN53653.1	89
380	55.1282	41.86	57.4	7.85e-10	2	86	43	41860	156	156	accB	71	144	WP_027450072.1	66
381	63.4615	40.404	57.8	8.26e-10	2	99	50	40404	156	156	accB	58	165	WP_153129270.1	76
382	47.4359	45.946	57	8.83e-10	1	74	33	45946	156	156	accB	83	136	QJR97972.1	70
383	34.6154	53.704	57	9.52e-10	0	54	25	53704	156	156	accB	103	142	WP_021992317.1	89
384	87.8205	34.307	57.4	9.77e-10	4	137	71	34307	156	156	accB	23	162	MBD8994855.1	42
512	97.5477	29.33	120	7.4e-30	12	358	211	29330	367	356	asd	3	321	CDE08166.1	2
513	96.4578	27.401	115	4.03e-28	8	354	220	27401	367	356	asd	4	320	CCY03384.1	3
514	97.0027	29.494	114	1.29e-27	9	356	211	29494	367	356	asd	3	319	CDE86477.1	2
515	98.6376	29.282	112	7.92e-27	10	362	203	29282	367	356	asd	4	320	CDE41428.1	3
516	98.6376	29.006	110	2.29e-26	10	362	205	29006	367	356	asd	3	319	CDF22348.1	2
517	96.4578	25.989	108	1.38e-25	8	354	227	25989	367	356	asd	3	320	MBD9200629.1	2
518	96.4578	25.989	108	1.54e-25	8	354	227	25989	367	356	asd	3	320	HAM29291.1	2
519	96.4578	25.989	108	1.54e-25	8	354	227	25989	367	356	asd	3	320	HAE07646.1	2
520	97.0027	26.966	108	2.22e-25	9	356	221	26966	367	356	asd	3	320	WP_004356976.1	2
521	98.3651	25.762	108	2.59e-25	8	361	219	25762	367	356	asd	3	320	MBD9041301.1	2
522	97.0027	26.685	107	3.21e-25	9	356	222	26685	367	356	asd	3	320	WP_021668414.1	2
523	97.2752	28.852	107	3.6e-25	9	357	212	28852	367	356	asd	3	319	MBD9027603.1	2
524	98.3651	28.809	107	3.98e-25	8	361	207	28809	367	356	asd	3	319	WP_104404628.1	2
525	99.1826	29.396	107	7.26e-25	11	364	201	29396	367	356	asd	3	319	CCY16287.1	2
526	98.0926	28.611	106	8.14e-25	8	360	208	28611	367	356	asd	4	320	WP_070694107.1	3
527	98.3651	26.87	105	1.51e-24	8	361	213	26870	367	356	asd	4	320	WP_025002986.1	3
528	98.0926	27.778	105	1.62e-24	8	360	211	27778	367	356	asd	4	320	WP_019967920.1	3
529	96.4578	28.531	105	3.12e-24	8	354	217	28531	367	356	asd	3	319	WP_106810857.1	2
530	97.0027	26.685	104	4.77e-24	9	356	222	26685	367	356	asd	3	320	WP_036884747.1	2
531	96.4578	27.401	104	4.89e-24	7	354	221	27401	367	356	asd	3	319	WP_094879673.1	2
532	98.3651	27.978	104	5.2e-24	10	361	209	27978	367	356	asd	4	320	WP_008564655.1	3
533	98.3651	28.255	104	6.06e-24	8	361	210	28255	367	356	asd	3	320	WP_004378383.1	2
534	96.1853	27.479	104	7.04e-24	8	353	220	27479	367	356	asd	4	319	WP_006950680.1	3
535	96.7302	31.268	103	1.19e-23	7	355	209	31268	367	356	asd	3	322	CCX45069.1	2
536	96.7302	31.268	103	1.19e-23	7	355	209	31268	367	356	asd	3	322	CCX45069.1	2
537	98.3651	27.701	103	1.26e-23	7	361	211	27701	367	356	asd	3	319	CDA43599.1	2
538	98.3651	27.978	103	1.5e-23	8	361	211	27978	367	356	asd	3	320	WP_004371133.1	2
539	97.0027	26.404	102	1.98e-23	9	356	221	26404	367	356	asd	4	320	WP_028896909.1	3
540	96.7302	28.732	102	2.28e-23	9	355	216	28732	367	356	asd	3	320	WP_036910187.1	2
541	98.6376	29.006	102	2.35e-23	10	362	206	29006	367	356	asd	3	320	WP_018919906.1	2
542	97.0027	28.09	102	2.49e-23	9	356	215	28090	367	356	asd	4	320	WP_103003731.1	3
543	97.0027	28.371	102	2.62e-23	9	356	214	28371	367	356	asd	4	320	WP_008124459.1	3
544	97.0027	27.809	102	3.12e-23	10	356	218	27809	367	356	asd	3	320	RKW50230.1	2
545	98.3651	24.931	102	3.16e-23	8	361	220	24931	367	356	asd	4	320	CDA94922.1	3
546	97.0027	27.528	102	3.69e-23	10	356	219	27528	367	356	asd	3	320	WP_025071142.1	2
547	98.3651	27.978	102	4.1e-23	8	361	211	27978	367	356	asd	3	320	WP_070666252.1	2
548	97.0027	27.809	102	4.63e-23	10	356	218	27809	367	356	asd	3	320	WP_004380187.1	2
549	96.4578	27.401	101	4.97e-23	7	354	221	27401	367	356	asd	3	319	MBD9246312.1	2
550	98.3651	27.424	101	8.58e-23	7	361	212	27424	367	356	asd	3	319	CDB04278.1	2
551	96.1853	28.895	101	8.79e-23	7	353	215	28895	367	356	asd	4	319	WP_172344062.1	3
552	96.7302	28.169	100	1e-22	8	355	218	28169	367	356	asd	3	320	WP_091839620.1	2
553	98.3651	27.424	100	1.5e-22	8	361	213	27424	367	356	asd	3	320	WP_007135356.1	2
554	96.7302	27.887	100	2.19e-22	9	355	217	27887	367	356	asd	4	320	WP_006952906.1	3
555	97.0027	28.933	99.8	2.93e-22	9	356	215	28933	367	356	asd	3	321	CDE57315.1	2
556	98.6376	25.691	99.8	3.18e-22	8	362	218	25691	367	356	asd	3	320	WP_088438889.1	2
557	98.0926	25.833	99.4	3.58e-22	9	360	218	25833	367	356	asd	4	320	WP_027952372.1	3
558	99.1826	26.648	99.4	3.81e-22	9	364	209	26648	367	356	asd	4	319	WP_029905156.1	3
559	98.0926	25.833	99.4	3.84e-22	9	360	218	25833	367	356	asd	4	320	WP_015298522.1	3
560	96.7302	28.732	99.4	4.03e-22	9	355	216	28732	367	356	asd	3	320	WP_091916243.1	2
561	97.0027	25.843	99	4.54e-22	9	356	223	25843	367	356	asd	4	320	WP_004345432.1	3
562	98.0926	25.833	99.4	4.63e-22	9	360	218	25833	367	356	asd	4	334	EGQ15873.1	17
563	100.272	27.989	99.4	4.65e-22	8	368	217	27989	367	356	asd	3	335	WP_172182809.1	2
564	96.7302	28.732	99.8	4.85e-22	9	355	216	28732	367	356	asd	3	357	SEW13843.1	39
565	96.7302	27.887	99	5.06e-22	8	355	219	27887	367	356	asd	3	320	WP_073207464.1	2
566	98.0926	27.222	99	5.48e-22	8	360	213	27222	367	356	asd	4	320	MBB1530825.1	3
567	96.4578	26.271	99	5.75e-22	9	354	224	26271	367	356	asd	4	320	WP_024990336.1	3
568	96.4578	27.119	98.6	6.87e-22	8	354	221	27119	367	356	asd	4	320	WP_021670513.1	3
569	97.2752	27.731	98.2	8.72e-22	9	357	217	27731	367	356	asd	3	320	WP_025072459.1	2
570	96.7302	27.887	98.2	1.07e-21	8	355	219	27887	367	356	asd	3	320	WP_028902530.1	2
571	97.0027	27.809	97.8	1.21e-21	11	356	218	27809	367	356	asd	3	320	WP_028900196.1	2
572	96.7302	27.887	97.8	1.27e-21	9	355	217	27887	367	356	asd	4	320	HCJ45945.1	3
573	96.7302	27.606	97.8	1.41e-21	8	355	220	27606	367	356	asd	3	320	WP_013065686.1	2
574	96.7302	27.887	97.8	1.44e-21	8	355	219	27887	367	356	asd	3	320	WP_033151019.1	2
575	98.3651	27.147	97.8	1.54e-21	8	361	214	27147	367	356	asd	3	320	WP_021826188.1	2
576	96.4578	27.966	97.4	1.7e-21	9	354	220	27966	367	356	asd	3	320	WP_130830434.1	2
577	98.6376	25.967	97.4	1.72e-21	8	362	217	25967	367	356	asd	3	320	WP_091824947.1	2
578	97.0027	25.843	97.4	1.86e-21	9	356	223	25843	367	356	asd	4	320	WP_004340104.1	3
579	96.7302	27.606	97.4	1.91e-21	9	355	218	27606	367	356	asd	4	320	MBB1539650.1	3
580	96.7302	27.606	97.4	1.95e-21	8	355	220	27606	367	356	asd	3	320	WP_028911935.1	2
581	98.3651	26.87	97.1	2.32e-21	7	361	214	26870	367	356	asd	3	319	WP_022429449.1	2
582	98.3651	26.87	97.1	2.34e-21	7	361	214	26870	367	356	asd	3	319	WP_007899975.1	2
583	98.3651	27.424	97.1	2.37e-21	8	361	212	27424	367	356	asd	3	319	CCY65628.1	2
584	97.0027	26.685	97.1	2.4e-21	10	356	222	26685	367	356	asd	3	320	WP_048797982.1	2
585	98.6376	25.691	97.1	2.52e-21	8	362	218	25691	367	356	asd	3	320	WP_074550264.1	2
586	96.4578	28.249	97.1	2.69e-21	6	354	218	28249	367	356	asd	3	319	CCX66523.1	2
587	96.7302	28.451	96.7	3.42e-21	9	355	217	28451	367	356	asd	3	320	WP_091900995.1	2
588	98.6376	25.691	96.7	3.66e-21	8	362	218	25691	367	356	asd	3	320	WP_006283422.1	2
589	98.3651	26.039	96.7	3.81e-21	8	361	216	26039	367	356	asd	4	320	WP_025792407.1	3
590	97.2752	27.731	96.7	3.99e-21	9	357	214	27731	367	356	asd	4	319	WP_036880317.1	3
591	96.4578	28.814	96.7	4.03e-21	8	354	216	28814	367	356	asd	3	319	WP_068856077.1	2
592	98.3651	26.039	96.3	4.33e-21	8	361	216	26039	367	356	asd	4	320	WP_008823967.1	3
593	96.4578	28.814	96.3	4.76e-21	8	354	216	28814	367	356	asd	3	319	OKZ27257.1	2
594	96.7302	28.451	96.7	5.7e-21	9	355	217	28451	367	356	asd	3	370	SEE45012.1	52
595	98.3651	26.87	95.9	6.45e-21	8	361	215	26870	367	356	asd	3	320	WP_025881196.1	2
596	96.1853	27.195	95.9	6.64e-21	8	353	221	27195	367	356	asd	4	319	MBD8998314.1	3
597	96.4578	28.814	95.9	7.33e-21	8	354	216	28814	367	356	asd	3	319	CCZ15212.1	2
598	96.4578	27.119	95.5	7.62e-21	7	354	222	27119	367	356	asd	3	319	CCY83924.1	2
599	96.1853	28.329	95.5	8.52e-21	7	353	218	28329	367	356	asd	4	320	WP_004368769.1	3
600	96.4578	27.119	95.5	9.39e-21	8	354	221	27119	367	356	asd	4	320	WP_091963576.1	3
601	97.2752	26.331	95.5	9.86e-21	9	357	221	26331	367	356	asd	3	319	WP_044063624.1	2
602	97.0027	26.404	95.5	1.02e-20	8	356	223	26404	367	356	asd	3	320	MBA7488491.1	2
603	98.0926	26.667	95.1	1.07e-20	8	360	215	26667	367	356	asd	4	320	WP_007173615.1	3
604	96.4578	27.684	95.1	1.08e-20	8	354	219	27684	367	356	asd	4	320	WP_120174354.1	3
605	96.1853	26.346	95.1	1.37e-20	8	353	224	26346	367	356	asd	4	319	WP_094383584.1	3
606	98.3651	26.87	94.7	1.65e-20	8	361	215	26870	367	356	asd	3	320	WP_021589994.1	2
607	98.9101	27.548	94.7	1.72e-20	9	363	208	27548	367	356	asd	4	320	WP_023983859.1	3
608	98.6376	26.243	94.7	1.86e-20	8	362	216	26243	367	356	asd	3	320	WP_118866009.1	2
609	98.3651	26.316	94.7	1.9e-20	8	361	215	26316	367	356	asd	4	320	WP_061868007.1	3
610	96.4578	27.684	94.4	2.18e-20	8	354	219	27684	367	356	asd	4	320	WP_050695909.1	3
611	98.3651	26.593	94.4	2.22e-20	8	361	216	26593	367	356	asd	3	320	WP_094388716.1	2
612	96.7302	27.887	94.4	2.36e-20	9	355	217	27887	367	356	asd	4	320	WP_064972327.1	3
613	98.3651	26.316	94	2.7e-20	8	361	215	26316	367	356	asd	4	320	WP_100021587.1	3
614	96.4578	27.119	94	2.76e-20	8	354	221	27119	367	356	asd	4	320	WP_091815261.1	3
615	97.2752	26.331	95.1	3.1e-20	9	357	221	26331	367	356	asd	3	413	EKX97292.1	96
616	96.7302	26.197	94	3.19e-20	8	355	225	26197	367	356	asd	3	320	WP_036866996.1	2
617	96.4578	27.401	94	3.38e-20	8	354	222	27401	367	356	asd	3	320	WP_004349178.1	2
618	98.6376	26.243	94	3.59e-20	8	362	216	26243	367	356	asd	3	320	WP_097655824.1	2
619	96.7302	27.042	93.6	3.73e-20	8	355	222	27042	367	356	asd	3	320	WP_091852251.1	2
620	96.4578	27.684	93.6	3.81e-20	8	354	219	27684	367	356	asd	4	320	WP_065367712.1	3
621	96.7302	26.197	93.6	4.15e-20	8	355	225	26197	367	356	asd	3	320	WP_036861338.1	2
622	97.2752	28.011	93.6	4.21e-20	9	357	214	28011	367	356	asd	4	320	HBN46587.1	3
623	97.2752	28.011	93.6	4.21e-20	9	357	214	28011	367	356	asd	4	320	HBN46587.1	3
624	96.7302	27.042	93.6	4.31e-20	8	355	222	27042	367	356	asd	3	320	WP_027455474.1	2
625	96.7302	26.479	93.6	4.45e-20	8	355	224	26479	367	356	asd	3	320	WP_036856756.1	2
626	98.3651	26.593	93.6	4.67e-20	8	361	216	26593	367	356	asd	3	320	WP_022311663.1	2
627	96.4578	26.836	93.6	4.95e-20	8	354	222	26836	367	356	asd	4	320	WP_089367095.1	3
628	96.4578	26.554	93.2	5.25e-20	7	354	223	26554	367	356	asd	4	320	WP_023057294.1	3
629	98.3651	26.593	93.2	5.25e-20	8	361	216	26593	367	356	asd	3	320	WP_094384913.1	2
630	96.7302	27.606	93.2	5.3e-20	8	355	220	27606	367	356	asd	3	320	WP_126679177.1	2
631	96.7302	26.479	93.2	5.85e-20	7	355	224	26479	367	356	asd	3	320	WP_036879689.1	2
632	98.9101	26.446	93.2	6.29e-20	8	363	214	26446	367	356	asd	3	320	WP_025875203.1	2
633	96.7302	26.479	93.2	6.38e-20	8	355	224	26479	367	356	asd	3	320	WP_004352502.1	2
634	96.7302	27.042	93.2	6.89e-20	8	355	222	27042	367	356	asd	3	320	WP_027450217.1	2
635	96.4578	27.401	92.8	6.9e-20	8	354	222	27401	367	356	asd	3	320	WP_102697894.1	2
636	96.4578	26.836	92.8	7.83e-20	8	354	222	26836	367	356	asd	4	320	WP_004360695.1	3
637	98.3651	26.316	92.8	9.15e-20	8	361	215	26316	367	356	asd	4	320	WP_014710481.1	3
638	96.7302	26.761	92.8	9.15e-20	8	355	223	26761	367	356	asd	3	320	WP_092068584.1	2
639	97.2752	26.05	92.4	1.04e-19	9	357	222	26050	367	356	asd	3	319	RKW62113.1	2
640	98.3651	26.316	92.8	1.08e-19	8	361	215	26316	367	356	asd	4	334	BAR95410.1	17
641	96.1853	26.912	92.4	1.09e-19	7	353	223	26912	367	356	asd	4	320	HCN53228.1	3
642	98.0926	26.944	92.4	1.17e-19	8	360	214	26944	367	356	asd	4	320	WP_116616081.1	3
643	96.7302	26.479	92	1.33e-19	8	355	224	26479	367	356	asd	3	320	WP_155716432.1	2
644	97.2752	27.731	92	1.38e-19	9	357	217	27731	367	356	asd	3	320	WP_107620797.1	2
645	96.4578	26.836	92	1.39e-19	8	354	222	26836	367	356	asd	4	320	WP_013264068.1	3
646	98.3651	26.316	92	1.58e-19	8	361	215	26316	367	356	asd	4	320	WP_099984837.1	3
647	96.4578	26.836	92	1.63e-19	8	354	222	26836	367	356	asd	4	320	WP_036863918.1	3
648	96.4578	25.706	91.7	1.98e-19	6	354	227	25706	367	356	asd	3	319	WP_009228391.1	2
649	96.4578	26.554	91.7	2.16e-19	8	354	223	26554	367	356	asd	4	320	WP_107625408.1	3
650	96.7302	25.915	91.7	2.2e-19	8	355	226	25915	367	356	asd	3	320	WP_004338802.1	2
651	97.2752	25.77	91.3	2.57e-19	9	357	223	25770	367	356	asd	4	321	WP_007573530.1	3
652	96.1853	28.329	91.3	2.59e-19	7	353	217	28329	367	356	asd	4	319	WP_172205505.1	3
653	98.3651	25.762	91.3	2.75e-19	8	361	217	25762	367	356	asd	4	320	WP_036888097.1	3
654	98.3651	25.762	91.3	2.75e-19	8	361	217	25762	367	356	asd	4	320	WP_036888097.1	3
655	96.4578	26.554	91.3	2.83e-19	8	354	223	26554	367	356	asd	4	320	WP_009012677.1	3
656	98.3651	26.316	91.3	3.03e-19	8	361	215	26316	367	356	asd	4	320	WP_097646669.1	3
657	98.6376	25.967	91.3	3.09e-19	8	362	217	25967	367	356	asd	3	320	WP_004382331.1	2
658	96.7302	26.479	91.3	3.13e-19	8	355	224	26479	367	356	asd	3	320	WP_007368104.1	2
659	98.3651	27.147	90.9	3.37e-19	8	361	214	27147	367	356	asd	3	320	CDD04220.1	2
660	98.3651	26.593	90.9	3.4e-19	8	361	215	26593	367	356	asd	3	319	WP_025066235.1	2
661	98.6376	25.691	90.9	3.47e-19	8	362	218	25691	367	356	asd	3	320	WP_006044414.1	2
662	97.2752	26.05	90.9	3.5e-19	9	357	222	26050	367	356	asd	3	319	WP_025797624.1	2
663	98.6376	26.796	90.9	3.88e-19	8	362	213	26796	367	356	asd	3	319	WP_009230996.1	2
664	98.6376	27.072	90.9	3.95e-19	8	362	212	27072	367	356	asd	3	319	WP_018967971.1	2
665	96.1853	26.346	90.9	4.04e-19	8	353	224	26346	367	356	asd	4	319	WP_094381615.1	3
666	98.6376	25.691	90.9	4.13e-19	8	362	218	25691	367	356	asd	3	320	WP_115083580.1	2
667	96.4578	27.119	90.9	4.25e-19	7	354	222	27119	367	356	asd	3	319	WP_021853439.1	2
668	98.6376	25.967	90.5	5.12e-19	8	362	217	25967	367	356	asd	3	320	WP_099995875.1	2
669	98.3651	27.147	90.5	5.42e-19	8	361	214	27147	367	356	asd	3	320	WP_044065787.1	2
670	98.3651	26.039	90.5	5.8e-19	8	361	216	26039	367	356	asd	4	320	WP_100014558.1	3
671	97.2752	26.891	90.5	5.92e-19	9	357	219	26891	367	356	asd	4	321	WP_028910537.1	3
672	96.4578	27.966	90.1	6.58e-19	7	354	220	27966	367	356	asd	3	320	WP_044073589.1	2
673	96.4578	27.684	90.1	6.9e-19	7	354	220	27684	367	356	asd	3	319	WP_172176509.1	2
674	98.6376	26.519	90.1	6.94e-19	8	362	214	26519	367	356	asd	3	319	WP_044260517.1	2
675	98.3651	26.039	90.1	7.32e-19	8	361	216	26039	367	356	asd	4	320	WP_097550371.1	3
676	98.6376	26.519	90.1	7.54e-19	8	362	215	26519	367	356	asd	3	320	WP_092112993.1	2
677	98.3651	26.039	90.1	7.61e-19	8	361	216	26039	367	356	asd	4	320	WP_100371097.1	3
678	98.6376	25.967	90.1	8.23e-19	8	362	217	25967	367	356	asd	3	320	WP_018911306.1	2
679	98.0926	26.667	89.7	9.15e-19	8	360	215	26667	367	356	asd	4	320	WP_036892529.1	3
680	98.6376	26.796	89.7	9.36e-19	8	362	213	26796	367	356	asd	3	319	WP_025815408.1	2
681	96.7302	28.169	89.7	9.83e-19	8	355	218	28169	367	356	asd	3	320	WP_125234822.1	2
682	98.6376	26.796	89.7	1.02e-18	8	362	213	26796	367	356	asd	3	319	WP_070720395.1	2
683	98.3651	25.762	89.7	1.11e-18	8	361	217	25762	367	356	asd	4	320	WP_045166791.1	3
684	98.6376	26.243	89.4	1.18e-18	8	362	216	26243	367	356	asd	3	320	WP_025000045.1	2
685	96.4578	25.989	89.4	1.21e-18	8	354	225	25989	367	356	asd	4	320	WP_153114469.1	3
686	96.4578	27.966	89.4	1.24e-18	7	354	220	27966	367	356	asd	3	320	WP_042517376.1	2
687	98.6376	25.967	89.4	1.24e-18	8	362	217	25967	367	356	asd	3	320	WP_096407517.1	2
688	98.6376	25.967	89.4	1.32e-18	8	362	217	25967	367	356	asd	3	320	WP_036895734.1	2
689	98.3651	26.039	89.4	1.43e-18	8	361	218	26039	367	356	asd	3	320	WP_004365510.1	2
690	80.109	28.912	88.2	1.57e-18	6	294	176	28912	367	297	asd	4	263	WP_104368825.1	3
691	96.4578	25.989	89	1.62e-18	8	354	225	25989	367	356	asd	4	320	WP_118312022.1	3
692	98.6376	26.796	89	1.62e-18	8	362	213	26796	367	356	asd	3	319	WP_009237784.1	2
693	98.3651	25.485	89	1.65e-18	8	361	218	25485	367	356	asd	4	320	WP_018464878.1	3
694	98.6376	25.967	89	1.7e-18	8	362	217	25967	367	356	asd	3	320	WP_099836575.1	2
695	98.0926	26.111	89	1.75e-18	8	360	217	26111	367	356	asd	4	320	WP_077196771.1	3
696	96.1853	26.912	89	1.76e-18	7	353	222	26912	367	356	asd	4	319	WP_172277336.1	3
697	98.6376	26.243	89	1.84e-18	8	362	216	26243	367	356	asd	3	328	EID32368.1	10
698	96.4578	25.989	89	2e-18	8	354	225	25989	367	356	asd	4	320	WP_134843993.1	3
699	98.6376	25.967	88.6	2.21e-18	8	362	217	25967	367	356	asd	3	320	WP_100016000.1	2
700	98.6376	25.967	88.6	2.23e-18	8	362	217	25967	367	356	asd	3	320	WP_028904910.1	2
701	96.4578	25.989	88.6	2.53e-18	8	354	225	25989	367	356	asd	4	320	WP_006848280.1	3
702	98.6376	25.691	88.6	2.53e-18	8	362	218	25691	367	356	asd	3	320	WP_094400546.1	2
703	96.4578	25.989	88.6	2.6e-18	8	354	225	25989	367	356	asd	4	320	WP_117662130.1	3
704	98.3651	26.316	88.6	2.84e-18	8	361	217	26316	367	356	asd	3	320	WP_100023837.1	2
705	96.4578	25.989	88.2	2.89e-18	8	354	225	25989	367	356	asd	4	320	WP_022110772.1	3
706	96.4578	25.706	88.2	3.09e-18	8	354	226	25706	367	356	asd	4	320	MBD9259994.1	3
707	96.1853	27.479	88.2	3.12e-18	7	353	221	27479	367	356	asd	4	320	WP_094464610.1	3
708	96.4578	25.989	88.2	3.18e-18	8	354	225	25989	367	356	asd	4	320	WP_118201595.1	3
709	96.4578	25.989	88.2	3.37e-18	8	354	225	25989	367	356	asd	4	320	WP_117587456.1	3
710	96.1853	27.479	88.2	3.51e-18	7	353	221	27479	367	356	asd	4	320	WP_094391397.1	3
711	98.3651	26.039	87.8	4.68e-18	8	361	218	26039	367	356	asd	3	320	WP_099892132.1	2
712	98.6376	25.691	87.8	4.87e-18	8	362	218	25691	367	356	asd	3	320	WP_100019853.1	2
713	98.6376	26.243	87.8	4.91e-18	9	362	216	26243	367	356	asd	3	320	MBD9229188.1	2
714	96.4578	25.989	87.8	4.91e-18	8	354	225	25989	367	356	asd	4	320	WP_089544301.1	3
715	96.4578	25.706	87.8	5.16e-18	8	354	226	25706	367	356	asd	4	320	WP_158463511.1	3
716	96.4578	25.706	87.4	5.46e-18	8	354	226	25706	367	356	asd	4	320	MBD9073811.1	3
717	98.3651	25.762	87.4	6.44e-18	8	361	219	25762	367	356	asd	3	320	WP_004363983.1	2
718	98.3651	25.485	87.4	6.49e-18	7	361	219	25485	367	356	asd	3	319	WP_024992402.1	2
719	96.4578	25.989	87.4	6.62e-18	8	354	225	25989	367	356	asd	4	320	WP_119249850.1	3
720	96.4578	26.271	87.4	6.82e-18	7	354	224	26271	367	356	asd	4	320	WP_153113365.1	3
721	96.4578	25.989	87.4	6.82e-18	8	354	225	25989	367	356	asd	4	320	WP_144151842.1	3
722	98.0926	26.667	87	8.43e-18	8	360	215	26667	367	356	asd	4	320	WP_107582161.1	3
723	96.4578	25.706	86.7	1.1e-17	8	354	226	25706	367	356	asd	4	320	HAH90455.1	3
724	96.4578	25.141	86.7	1.14e-17	6	354	229	25141	367	356	asd	3	319	WP_018363287.1	2
725	98.3651	25.485	86.3	1.75e-17	7	361	219	25485	367	356	asd	3	319	WP_021583104.1	2
726	98.6376	25.691	85.9	1.87e-17	8	362	218	25691	367	356	asd	3	320	CCZ12093.1	2
727	98.3651	26.593	85.5	2.75e-17	9	361	216	26593	367	356	asd	3	320	WP_060932639.1	2
728	98.3651	26.316	85.1	3.43e-17	9	361	217	26316	367	356	asd	3	320	WP_008451067.1	2
729	98.0926	25.556	84.3	7.44e-17	7	360	219	25556	367	356	asd	4	320	WP_036855262.1	3
730	98.3651	26.316	83.2	1.6e-16	9	361	217	26316	367	356	asd	3	320	WP_019036280.1	2
731	98.6376	25.138	81.6	5.72e-16	8	362	220	25138	367	356	asd	3	320	WP_024998825.1	2
732	82.2888	27.152	78.6	5.24e-15	7	302	170	27152	367	356	asd	63	279	MBD9300159.1	20
733	88.5559	25.538	78.2	8.24e-15	7	325	206	25538	367	356	asd	33	295	WP_153129244.1	6
734	80.3815	26.78	77	1.34e-14	7	295	180	26780	367	356	asd	63	280	MBD8970987.1	21
735	98.3651	24.931	77	2.04e-14	9	361	222	24931	367	356	asd	3	320	WP_036899766.1	2
736	98.3651	24.931	76.6	2.83e-14	9	361	222	24931	367	356	asd	3	320	WP_062433813.1	2
737	70.8447	26.538	67.4	1.51e-11	6	260	157	26538	367	356	asd	98	228	MQO97491.1	2
738	62.6703	28.696	64.3	1.36e-10	5	230	121	28696	367	356	asd	134	194	HAG33500.1	1
739	65.6676	28.216	63.5	2.59e-10	6	241	143	28216	367	244	asd	4	213	HAG32421.1	3
740	48.7738	29.05	62	5.69e-10	3	179	121	29050	367	182	asd	4	175	MBB1551631.1	3
1064	79.1277	26.378	85.1	3.12e-17	6	254	158	26378	321	307	birA	59	355	CDE87600.1	126
1065	74.1433	28.992	82.4	7.19e-17	7	238	156	28992	321	314	birA	84	256	WP_006951048.1	25
1066	53.8941	30.058	82	1.06e-16	3	173	118	30058	321	254	birA	84	198	WP_155716355.1	27
1067	53.8941	30.058	81.3	1.88e-16	3	173	118	30058	321	254	birA	84	198	WP_036895642.1	27
1068	53.8941	30.058	81.3	2.38e-16	3	173	118	30058	321	254	birA	84	211	EID32710.1	40
1069	74.1433	28.571	80.1	3.4e-16	7	238	161	28571	321	316	birA	84	241	WP_007412326.1	8
1070	74.1433	28.571	80.1	3.91e-16	7	238	161	28571	321	316	birA	84	241	WP_048798668.1	8
1071	74.1433	28.571	80.1	4.28e-16	7	238	161	28571	321	316	birA	84	241	WP_004344000.1	8
1072	55.7632	30.726	80.1	5.15e-16	3	179	121	30726	321	257	birA	81	201	WP_036861907.1	24
1073	44.5483	36.364	79.7	5.41e-16	3	143	84	36364	321	220	birA	81	144	WP_094384751.1	6
1074	74.1433	28.571	79.3	6.23e-16	7	238	161	28571	321	316	birA	84	241	WP_039858030.1	8
1075	58.2555	31.016	79.7	6.33e-16	6	187	119	31016	321	253	birA	70	187	WP_107581291.1	8
1076	74.1433	28.571	79.3	9.51e-16	7	238	161	28571	321	316	birA	84	249	EFC75615.1	16
1077	53.8941	30.058	79.3	9.76e-16	3	173	118	30058	321	254	birA	84	198	WP_004383792.1	27
1078	74.1433	28.571	78.6	1.39e-15	7	238	161	28571	321	316	birA	84	241	WP_115154185.1	8
1079	39.5639	35.433	78.6	1.59e-15	1	127	81	35433	321	209	birA	84	134	CDE41866.1	8
1080	44.5483	35.664	78.2	1.62e-15	3	143	85	35664	321	220	birA	81	144	WP_094467047.1	6
1081	74.4548	26.36	78.6	1.71e-15	4	239	172	26360	321	316	birA	81	261	WP_120173786.1	24
1082	54.5171	30.286	78.2	1.72e-15	4	175	110	30286	321	252	birA	84	176	WP_024989677.1	8
1083	59.5016	33.508	78.6	1.72e-15	7	191	109	33508	321	255	birA	77	199	WP_116615937.1	15
1084	44.5483	35.664	78.2	2.06e-15	3	143	85	35664	321	220	birA	81	144	WP_094389149.1	6
1085	74.4548	26.36	78.2	2.19e-15	4	239	172	26360	321	316	birA	81	261	WP_107624848.1	24
1086	44.5483	35.664	77.8	2.23e-15	3	143	85	35664	321	220	birA	81	144	CDD00728.1	6
1087	67.9128	27.982	78.2	2.37e-15	5	218	130	27982	321	269	birA	77	224	EFA43486.1	9
1088	67.9128	27.982	78.2	2.88e-15	5	218	130	27982	321	269	birA	77	230	WP_044123353.1	15
1089	59.5016	31.937	77.8	3.31e-15	6	191	112	31937	321	255	birA	77	199	WP_036894536.1	15
1090	54.8287	34.659	77	4.84e-15	7	176	100	34659	321	254	birA	83	171	OKZ25922.1	7
1091	39.8754	32.031	77	5.14e-15	2	128	85	32031	321	209	birA	84	135	WP_172344794.1	8
1092	60.4361	30.928	77	5.36e-15	5	194	114	30928	321	267	birA	84	194	WP_172179457.1	11
1093	58.2555	29.947	76.6	5.89e-15	5	187	117	29947	321	261	birA	88	197	WP_027455330.1	12
1094	55.7632	30.168	77	6.09e-15	5	179	116	30168	321	252	birA	79	194	WP_077195507.1	20
1095	74.4548	26.36	77	6.24e-15	4	239	172	26360	321	316	birA	81	261	WP_013264363.1	24
1096	54.5171	34.286	76.3	8.56e-15	7	175	100	34286	321	254	birA	84	171	WP_068857288.1	8
1097	57.0093	27.869	76.3	9.3e-15	5	183	123	27869	321	263	birA	88	190	WP_036904682.1	10
1098	54.5171	34.286	76.3	9.41e-15	7	175	100	34286	321	254	birA	84	174	CCZ14306.1	11
1099	60.7477	32.821	76.3	1.17e-14	6	195	117	32821	321	271	birA	89	220	WP_005846351.1	28
1100	60.7477	32.821	76.6	1.18e-14	6	195	117	32821	321	271	birA	89	231	AGB28933.1	39
1101	44.5483	34.965	75.9	1.2e-14	3	143	86	34965	321	220	birA	81	144	HAG32138.1	6
1102	59.19	30.526	75.5	1.22e-14	7	190	113	30526	321	264	birA	88	195	WP_091957439.1	12
1103	56.0748	31.111	76.3	1.24e-14	5	180	115	31111	321	255	birA	81	198	WP_048739196.1	23
1104	53.271	29.825	76.3	1.26e-14	3	171	117	29825	321	252	birA	84	195	WP_130828509.1	26
1105	61.3707	28.934	75.9	1.29e-14	5	197	119	28934	321	264	birA	87	205	WP_036880205.1	11
1106	54.8287	30.682	75.9	1.39e-14	3	176	119	30682	321	257	birA	84	201	WP_118867029.1	27
1107	44.5483	34.965	75.5	1.55e-14	3	143	86	34965	321	220	birA	81	144	WP_094421057.1	6
1108	53.8941	29.48	75.9	1.71e-14	3	173	119	29480	321	254	birA	84	198	WP_018910323.1	27
1109	53.8941	29.48	75.5	2.18e-14	3	173	119	29480	321	251	birA	81	192	WP_036883956.1	21
1110	74.4548	25.941	75.5	2.2e-14	4	239	173	25941	321	316	birA	81	260	WP_025792037.1	23
1111	56.0748	30.556	75.5	2.21e-14	5	180	116	30556	321	255	birA	81	198	WP_061449977.1	23
1112	56.0748	28.333	75.5	2.22e-14	3	180	126	28333	321	257	birA	80	201	WP_025077553.1	23
1113	74.4548	26.36	75.5	2.31e-14	4	239	172	26360	321	316	birA	81	261	WP_025837975.1	24
1114	60.7477	32.821	75.5	2.58e-14	6	195	117	32821	321	271	birA	89	220	WP_027952071.1	28
1115	55.7632	29.609	75.1	2.81e-14	3	179	123	29609	321	257	birA	81	201	WP_021672301.1	24
1116	54.8287	30.114	75.1	2.86e-14	3	176	120	30114	321	257	birA	84	201	WP_025067714.1	27
1117	54.8287	30.114	75.1	2.95e-14	3	176	120	30114	321	257	birA	84	201	WP_004353067.1	27
1118	58.2555	31.551	74.7	3.16e-14	5	187	114	31551	321	261	birA	88	198	WP_052341994.1	13
1119	74.4548	25.941	75.1	3.31e-14	4	239	173	25941	321	316	birA	81	261	WP_004360455.1	24
1120	42.9907	34.058	74.3	4.1e-14	3	138	83	34058	321	220	birA	87	144	WP_158676075.1	11
1121	41.7445	33.582	74.3	4.24e-14	3	134	85	33582	321	220	birA	88	142	WP_091767468.1	12
1122	56.0748	30.556	74.7	4.25e-14	5	180	116	30556	321	255	birA	81	198	WP_036886832.1	23
1123	74.4548	25.941	74.7	4.35e-14	4	239	173	25941	321	316	birA	81	260	WP_008822074.1	23
1124	56.0748	30.556	74.7	4.43e-14	5	180	116	30556	321	255	birA	81	196	EFB93408.1	21
1125	42.3676	32.353	74.3	4.5e-14	3	136	89	32353	321	220	birA	87	145	WP_024992000.1	11
1126	41.7445	33.582	73.9	4.59e-14	3	134	85	33582	321	220	birA	88	142	WP_036910211.1	12
1127	42.3676	32.353	74.3	4.72e-14	3	136	89	32353	321	220	birA	87	145	WP_021584553.1	11
1128	42.3676	34.559	74.3	4.82e-14	4	136	84	34559	321	212	birA	80	137	WP_036878441.1	4
1129	58.2555	29.947	74.3	4.93e-14	6	187	121	29947	321	253	birA	70	187	WP_021589075.1	8
1130	56.0748	30.556	74.3	4.97e-14	5	180	116	30556	321	255	birA	81	198	WP_004338875.1	23
1131	42.9907	34.058	74.3	5.44e-14	3	138	83	34058	321	220	birA	87	158	RUL59975.1	25
1132	73.5202	25.847	74.3	5.66e-14	4	236	171	25847	321	316	birA	84	261	WP_089365549.1	27
1133	52.9595	29.412	73.9	6.76e-14	3	170	117	29412	321	251	birA	84	192	WP_004357449.1	24
1134	58.567	28.191	73.6	7.54e-14	5	188	119	28191	321	263	birA	88	196	WP_036928672.1	13
1135	55.7632	29.05	73.9	7.65e-14	3	179	124	29050	321	257	birA	81	201	WP_009012272.1	24
1136	53.271	29.24	73.9	8.03e-14	3	171	118	29240	321	252	birA	84	195	WP_147785451.1	26
1137	76.0125	29.098	73.6	9.81e-14	9	244	161	29098	321	316	birA	80	259	HAM29264.1	21
1138	53.8941	28.902	73.6	9.87e-14	3	173	120	28902	321	251	birA	81	192	WP_021669111.1	21
1139	58.2555	30.481	73.6	1.01e-13	6	187	120	30481	321	253	birA	70	187	WP_081658029.1	8
1140	44.8598	34.028	73.2	1.07e-13	4	144	90	34028	321	220	birA	80	145	WP_016665290.1	4
1141	54.5171	28.571	73.6	1.09e-13	5	175	119	28571	321	255	birA	84	190	WP_018462520.1	19
1142	55.4517	29.775	73.6	1.13e-13	6	178	112	29775	321	253	birA	81	192	WP_036854566.1	23
1143	55.4517	29.775	73.6	1.17e-13	6	178	112	29775	321	253	birA	81	192	WP_060933446.1	23
1144	55.4517	29.775	73.6	1.17e-13	6	178	112	29775	321	253	birA	81	192	WP_008450080.1	23
1145	52.9595	28.824	73.2	1.23e-13	3	170	118	28824	321	251	birA	84	192	WP_117653381.1	24
1146	31.7757	43.137	73.2	1.4e-13	2	102	56	43137	321	209	birA	109	142	CCY15731.1	42
1147	73.5202	26.695	73.2	1.52e-13	4	236	169	26695	321	316	birA	84	261	WP_007367238.1	27
1148	76.0125	29.098	73.2	1.53e-13	9	244	161	29098	321	316	birA	80	259	HAE07564.1	21
1149	55.4517	29.775	73.2	1.64e-13	6	178	112	29775	321	253	birA	81	192	WP_019035690.1	23
1150	52.9595	31.176	72.4	1.85e-13	7	170	98	31176	321	264	birA	109	207	WP_092069105.1	43
1151	52.3364	27.976	72.8	1.89e-13	4	168	114	27976	321	250	birA	88	192	HCC88262.1	27
1152	54.8287	29.545	72.8	2.14e-13	3	176	121	29545	321	257	birA	84	201	WP_036853867.1	27
1153	64.7975	31.731	72.4	2.38e-13	8	208	128	31731	321	264	birA	66	209	SEW06394.1	7
1154	53.5826	34.302	72	2.4e-13	7	172	97	34302	321	256	birA	88	170	WP_091842656.1	12
1155	60.1246	25.907	72.4	2.6e-13	4	193	127	25907	321	264	birA	88	219	WP_028903821.1	27
1156	55.7632	29.609	72.4	3.03e-13	3	179	123	29609	321	257	birA	81	201	WP_036924039.1	24
1157	64.486	31.884	72	3.05e-13	8	207	127	31884	321	264	birA	67	202	WP_091915592.1	1
1158	76.0125	29.098	72.4	3.1e-13	9	244	161	29098	321	316	birA	80	259	MBD9042460.1	21
1159	54.8287	29.545	72	3.24e-13	3	176	121	29545	321	257	birA	84	201	WP_013670489.1	27
1160	41.7445	35.075	71.6	4.05e-13	4	134	74	35075	321	209	birA	84	136	WP_006949813.1	8
1161	67.6012	29.954	70.9	6.15e-13	9	217	122	29954	321	301	birA	88	206	WP_091819265.1	17
1162	61.3707	27.919	70.9	6.57e-13	5	197	121	27919	321	264	birA	87	205	WP_004350734.1	11
1163	45.4829	33.562	70.9	6.6e-13	5	146	88	33562	321	220	birA	80	145	WP_004369664.1	4
1164	47.9751	33.117	70.9	7.19e-13	5	154	93	33117	321	233	birA	87	161	CCZ11094.1	11
1165	39.8754	35.156	70.9	7.56e-13	3	128	79	35156	321	212	birA	87	136	WP_125234104.1	11
1166	57.9439	26.882	70.5	7.84e-13	5	186	120	26882	321	261	birA	88	194	WP_028907448.1	13
1167	58.567	31.915	70.9	8.24e-13	5	188	105	31915	321	273	birA	88	180	CCX65141.1	14
1168	53.8941	28.902	70.9	9.1e-13	6	173	110	28902	321	253	birA	88	193	WP_007574805.1	27
1169	64.7975	31.25	70.5	1.14e-12	8	208	129	31250	321	264	birA	66	209	SEE50643.1	7
1170	62.6168	26.368	70.5	1.17e-12	5	201	126	26368	321	261	birA	81	221	WP_028901806.1	23
1171	40.81	33.588	70.5	1.19e-12	3	131	84	33588	321	212	birA	84	135	QJR97932.1	6
1172	45.4829	32.877	70.1	1.23e-12	5	146	89	32877	321	220	birA	80	145	WP_023984718.1	4
1173	56.6978	27.473	70.5	1.31e-12	5	182	126	27473	321	252	birA	75	194	WP_181792342.1	15
1174	53.5826	29.651	70.5	1.32e-12	5	172	110	29651	321	251	birA	88	195	MBA7488334.1	27
1175	61.3707	27.919	70.1	1.33e-12	5	197	121	27919	321	264	birA	87	205	WP_023058164.1	11
1176	56.6978	27.473	70.5	1.49e-12	5	182	126	27473	321	252	birA	75	207	SUC12795.1	28
1177	64.486	31.401	70.1	1.58e-12	8	207	128	31401	321	264	birA	67	202	WP_176771105.1	1
1178	62.9283	28.713	69.7	1.61e-12	6	202	119	28713	321	264	birA	84	205	WP_036874346.1	8
1179	57.9439	26.344	69.7	1.63e-12	5	186	121	26344	321	261	birA	88	194	WP_091862421.1	13
1180	76.6355	28.049	70.1	1.69e-12	9	246	152	28049	321	316	birA	88	250	WP_172275230.1	13
1181	46.4174	30.872	70.1	1.9e-12	5	149	94	30872	321	253	birA	107	187	WP_004377127.1	46
1182	46.4174	30.872	69.7	2.09e-12	5	149	94	30872	321	253	birA	107	187	WP_018919610.1	46
1183	46.4174	30.872	69.7	2.28e-12	5	149	94	30872	321	253	birA	107	187	WP_004371535.1	46
1184	57.9439	26.344	69.3	2.28e-12	5	186	121	26344	321	261	birA	88	194	WP_074761017.1	13
1185	57.9439	27.419	69.3	2.31e-12	5	186	119	27419	321	261	birA	88	194	WP_041386074.1	13
1186	57.9439	27.419	69.3	2.37e-12	5	186	119	27419	321	261	birA	88	194	WP_074833315.1	13
1187	46.4174	30.872	69.7	2.56e-12	5	149	94	30872	321	253	birA	107	187	WP_025879730.1	46
1188	46.4174	30.872	69.7	2.61e-12	5	149	94	30872	321	253	birA	107	187	WP_070667247.1	46
1189	57.9439	27.419	69.3	3.05e-12	5	186	119	27419	321	261	birA	88	214	ADE83038.1	33
1190	54.8287	30.114	69.3	3.45e-12	4	176	119	30114	321	252	birA	80	204	WP_100370010.1	30
1191	36.7601	35.593	68.6	4.11e-12	3	118	71	35593	321	220	birA	104	142	WP_029905789.1	29
1192	47.9751	32.468	68.6	4.26e-12	5	154	94	32468	321	233	birA	87	161	MBD9230114.1	11
1193	40.4984	33.077	68.6	4.38e-12	4	130	80	33077	321	209	birA	84	134	WP_094401477.1	8
1194	55.4517	28.09	68.6	4.84e-12	4	178	110	28090	321	255	birA	87	179	WP_119248713.1	11
1195	38.0062	33.607	68.6	5e-12	2	122	79	33607	321	209	birA	89	133	WP_019187154.1	13
1196	56.0748	28.333	68.6	5.4e-12	6	180	118	28333	321	263	birA	88	184	WP_009228325.1	12
1197	56.6978	26.923	68.6	5.59e-12	5	182	127	26923	321	252	birA	75	194	WP_040595560.1	15
1198	54.2056	30.46	68.6	5.64e-12	5	174	106	30460	321	251	birA	88	195	MBB1550501.1	27
1199	54.2056	30.46	68.6	5.64e-12	5	174	106	30460	321	251	birA	88	195	MBB1538681.1	27
1200	57.9439	26.882	68.2	5.78e-12	5	186	120	26882	321	261	birA	88	194	WP_073047319.1	13
1201	56.6978	26.923	68.6	6.19e-12	5	182	127	26923	321	252	birA	75	207	RKW49409.1	28
1202	56.6978	26.923	68.6	6.31e-12	5	182	127	26923	321	252	birA	75	207	WP_006044552.1	28
1203	78.1931	26.295	68.2	6.49e-12	10	251	152	26295	321	317	birA	84	242	MBD9300279.1	8
1204	57.3209	28.261	68.6	6.53e-12	5	184	116	28261	321	251	birA	81	200	HCJ47306.1	20
1205	39.2523	35.714	67.8	7.47e-12	5	126	74	35714	321	209	birA	86	129	CDE07286.1	9
1206	53.271	28.655	67.8	9.61e-12	4	171	118	28655	321	255	birA	87	179	HCN52791.1	11
1207	52.3364	27.976	67.4	1.27e-11	3	168	117	27976	321	252	birA	87	176	WP_118312571.1	11
1208	61.0592	26.531	67	1.29e-11	7	196	123	26531	321	262	birA	81	193	WP_094391269.1	5
1209	55.4517	27.528	67.4	1.32e-11	4	178	111	27528	321	255	birA	87	179	WP_117661373.1	11
1210	50.7788	29.448	67.4	1.42e-11	6	163	107	29448	321	238	birA	80	172	RKW51492.1	14
1211	43.6137	34.286	67	1.48e-11	6	140	81	34286	321	220	birA	87	145	WP_106811546.1	11
1212	55.4517	27.528	67	1.58e-11	4	178	111	27528	321	255	birA	87	179	WP_089544034.1	11
1213	54.8287	29.545	67.4	1.65e-11	4	176	120	29545	321	252	birA	80	194	WP_099984130.1	20
1214	55.7632	30.726	66.6	1.75e-11	4	179	103	30726	321	261	birA	104	200	CCX43579.1	22
1215	54.5171	28	67	1.75e-11	4	175	108	28000	321	252	birA	87	176	WP_153097753.1	11
1216	39.8754	33.594	67	1.8e-11	4	128	74	33594	321	209	birA	88	148	WP_021824570.1	26
1217	74.7664	26.25	66.6	1.95e-11	8	240	158	26250	321	317	birA	88	242	MBD9016500.1	12
1218	38.9408	32	66.6	2.05e-11	2	125	80	32000	321	209	birA	88	134	WP_094448067.1	12
1219	61.0592	27.041	66.2	2.18e-11	7	196	122	27041	321	262	birA	81	193	WP_094436611.1	5
1220	61.0592	26.531	66.2	2.2e-11	7	196	123	26531	321	262	birA	81	193	WP_094446555.1	5
1221	38.9408	32	66.6	2.22e-11	2	125	80	32000	321	209	birA	88	134	WP_074549385.1	12
1222	55.1402	30.508	66.6	2.23e-11	3	177	119	30508	321	251	birA	77	177	WP_094385210.1	3
1223	38.9408	32	66.6	2.24e-11	2	125	80	32000	321	209	birA	88	134	WP_173651757.1	12
1224	38.9408	32	66.6	2.24e-11	2	125	80	32000	321	209	birA	88	134	WP_027453329.1	12
1225	38.9408	32	66.6	2.24e-11	2	125	80	32000	321	209	birA	88	134	WP_074803193.1	12
1226	50.1558	28.571	66.6	2.28e-11	3	161	112	28571	321	247	birA	89	189	WP_025002045.1	30
1227	42.9907	34.783	66.6	2.47e-11	5	138	81	34783	321	213	birA	84	146	CDE58324.1	10
1228	54.8287	28.977	66.6	2.53e-11	4	176	121	28977	321	252	birA	80	194	WP_099976728.1	20
1229	57.9439	26.344	66.2	2.6e-11	5	186	121	26344	321	261	birA	88	194	WP_033149630.1	13
1230	54.8287	30.114	66.6	2.81e-11	4	176	119	30114	321	252	birA	80	204	WP_100023055.1	30
1231	54.2056	29.885	66.6	2.86e-11	5	174	107	29885	321	251	birA	88	195	MBB1529407.1	27
1232	79.4393	26.667	66.2	2.86e-11	10	255	154	26667	321	321	birA	84	247	WP_102187590.1	9
1233	56.6978	29.121	66.6	2.89e-11	4	182	125	29121	321	252	birA	74	194	KJJ87973.1	14
1234	50.4673	29.012	66.6	3.03e-11	4	162	109	29012	321	238	birA	80	172	WP_025071310.1	14
1235	41.433	31.579	66.2	3.09e-11	2	133	89	31579	321	220	birA	89	144	WP_009231483.1	13
1236	54.8287	29.545	66.6	3.3e-11	4	176	120	29545	321	252	birA	80	204	WP_097655741.1	30
1237	55.7632	29.05	66.2	3.31e-11	4	179	121	29050	321	259	birA	84	183	WP_062433966.1	8
1238	56.6978	30.22	65.9	3.47e-11	7	182	115	30220	321	259	birA	84	183	WP_036896320.1	8
1239	55.4517	28.652	65.9	3.49e-11	6	178	120	28652	321	263	birA	88	184	WP_018362855.1	12
1240	38.0062	32.787	66.2	3.5e-11	2	122	80	32787	321	209	birA	89	133	RKW54837.1	13
1241	56.6978	29.121	66.2	3.66e-11	4	182	125	29121	321	252	birA	74	204	WP_045166705.1	24
1242	50.7788	30.061	66.2	3.66e-11	5	163	106	30061	321	238	birA	80	172	WP_028900244.1	14
1243	50.7788	29.448	66.2	3.73e-11	6	163	107	29448	321	238	birA	80	172	WP_004379082.1	14
1244	76.947	27.126	65.9	3.77e-11	10	247	163	27126	321	321	birA	84	247	WP_103002945.1	9
1245	61.0592	28.571	65.1	4.12e-11	7	196	115	28571	321	301	birA	108	176	SDH41239.1	4
1246	54.8287	29.545	65.9	4.65e-11	4	176	120	29545	321	252	birA	80	204	WP_097550260.1	30
1247	54.8287	29.545	65.9	4.7e-11	4	176	120	29545	321	252	birA	80	194	WP_024999022.1	20
1248	74.7664	26.25	65.5	4.71e-11	8	240	166	26250	321	317	birA	84	242	MBD9261239.1	8
1249	54.8287	29.545	65.9	4.83e-11	4	176	120	29545	321	252	birA	80	204	WP_036881448.1	30
1250	56.6978	29.121	65.9	4.87e-11	4	182	125	29121	321	252	birA	74	204	WP_061869175.1	24
1251	54.5171	30.286	65.5	4.88e-11	4	175	110	30286	321	252	birA	84	176	WP_153124521.1	8
1252	54.8287	29.545	65.9	5.26e-11	4	176	120	29545	321	252	birA	80	204	WP_124138961.1	30
1253	41.7445	34.328	65.5	5.34e-11	3	134	85	34328	321	220	birA	89	143	WP_007898455.1	11
1254	54.8287	29.545	65.9	5.36e-11	4	176	120	29545	321	252	birA	80	204	WP_096406822.1	30
1255	54.8287	29.545	65.9	5.62e-11	4	176	120	29545	321	252	birA	80	204	WP_100356483.1	30
1256	54.8287	28.977	65.5	5.69e-11	4	176	121	28977	321	252	birA	80	194	WP_099836018.1	20
1257	53.271	27.485	65.5	5.86e-11	3	171	120	27485	321	255	birA	87	179	MBD9057537.1	11
1258	74.7664	26.25	65.5	5.88e-11	8	240	166	26250	321	317	birA	84	242	MBD9073787.1	8
1259	54.8287	29.545	65.9	5.93e-11	4	176	120	29545	321	252	birA	80	217	ELX68430.1	43
1260	32.0872	33.981	65.5	6.08e-11	2	103	66	33981	321	209	birA	108	148	WP_007134374.1	47
1261	61.0592	29.592	65.5	6.2e-11	7	196	127	29592	321	267	birA	77	192	WP_094380046.1	3
1262	56.6978	29.121	65.5	6.56e-11	4	182	125	29121	321	252	birA	74	194	WP_028904870.1	14
1263	56.6978	29.121	65.5	7.05e-11	4	182	125	29121	321	252	birA	74	204	WP_097647991.1	24
1264	54.8287	29.545	65.5	7.46e-11	4	176	120	29545	321	252	birA	80	204	WP_036874330.1	30
1265	38.3178	33.333	65.1	7.76e-11	1	123	81	33333	321	209	birA	88	136	WP_172177183.1	14
1266	54.8287	29.545	65.5	7.82e-11	4	176	120	29545	321	252	birA	80	204	WP_112199868.1	30
1267	55.4517	26.966	65.1	7.95e-11	4	178	112	26966	321	255	birA	87	179	WP_153127875.1	11
1268	54.8287	29.545	65.5	8.05e-11	4	176	120	29545	321	252	birA	80	204	WP_099995137.1	30
1269	48.5981	30.128	65.1	8.32e-11	5	156	92	30128	321	255	birA	108	190	CCY81832.1	44
1270	55.4517	27.528	65.1	8.71e-11	3	178	126	27528	321	259	birA	84	200	WP_028897865.1	24
1271	32.7103	35.238	65.1	9.09e-11	2	105	66	35238	321	212	birA	109	146	CDF22302.1	43
1272	38.0062	32.787	64.7	9.55e-11	2	122	80	32787	321	209	birA	89	133	WP_009237320.1	13
1273	54.8287	29.545	65.1	9.61e-11	4	176	120	29545	321	252	birA	80	214	ETD28016.1	40
1274	45.1713	31.724	63.5	1.1e-10	4	145	94	31724	321	220	birA	80	173	RKW57110.1	30
1275	61.0592	26.02	64.3	1.18e-10	7	196	124	26020	321	262	birA	81	193	WP_094440530.1	5
1276	45.7944	31.293	64.7	1.23e-10	1	147	100	31293	321	254	birA	108	179	WP_172204168.1	34
1277	39.8754	35.156	64.3	1.29e-10	3	128	78	35156	321	212	birA	88	137	WP_091821017.1	12
1278	43.3022	33.094	64.7	1.34e-10	4	139	76	33094	321	220	birA	85	154	MBD9035577.1	30
1279	54.8287	29.545	64.7	1.38e-10	4	176	120	29545	321	252	birA	80	204	WP_100021094.1	30
1280	39.5639	33.858	64.3	1.4e-10	5	127	75	33858	321	209	birA	88	134	MBD8997811.1	12
1281	42.3676	33.088	64.3	1.47e-10	3	136	84	33088	321	220	birA	89	143	CDE32725.1	11
1282	55.1402	29.944	64.7	1.5e-10	5	177	118	29944	321	252	birA	80	204	WP_088438151.1	30
1283	38.0062	32.787	64.3	1.63e-10	2	122	80	32787	321	209	birA	89	133	WP_018967676.1	13
1284	38.0062	32.787	63.9	1.79e-10	2	122	80	32787	321	209	birA	89	133	RKW52645.1	13
1285	32.3988	38.462	63.9	1.83e-10	3	104	60	38462	321	209	birA	108	132	WP_118354806.1	31
1286	55.1402	29.944	64.3	1.9e-10	5	177	118	29944	321	252	birA	80	204	WP_088399396.1	30
1287	36.1371	35.345	63.9	2e-10	2	116	69	35345	321	220	birA	108	143	CDB03974.1	31
1288	50.7788	32.515	63.5	2.36e-10	6	163	104	32515	321	243	birA	84	167	WP_107620040.1	8
1289	68.5358	28.636	63.5	2.47e-10	8	220	138	28636	321	318	birA	109	232	GAY29307.1	22
1290	55.1402	29.944	63.5	3.51e-10	5	177	118	29944	321	252	birA	80	204	WP_099890730.1	30
1291	45.7944	30.612	63.2	3.52e-10	1	147	101	30612	321	254	birA	108	179	WP_104369510.1	34
1292	68.5358	28.636	63.2	3.81e-10	8	220	138	28636	321	318	birA	109	254	WP_104403654.1	44
1293	76.947	27.53	63.2	3.82e-10	10	247	162	27530	321	321	birA	84	246	WP_036928321.1	8
1294	33.0218	37.736	62.8	4.2e-10	4	106	62	37736	321	212	birA	109	137	WP_092112639.1	34
1295	54.8287	28.977	62.8	5.03e-10	4	176	121	28977	321	252	birA	80	194	BAR95482.1	20
1296	80.0623	26.848	62.8	5.13e-10	10	257	141	26848	321	316	birA	84	241	WP_134844542.1	8
1297	80.0623	26.848	62.8	5.13e-10	10	257	141	26848	321	316	birA	84	241	WP_134844542.1	8
1298	54.8287	28.977	62.8	5.32e-10	4	176	121	28977	321	252	birA	80	204	WP_014710412.1	30
1299	54.8287	28.409	62.8	5.32e-10	4	176	122	28409	321	252	birA	80	194	WP_100019571.1	20
1300	54.8287	28.977	62.8	5.42e-10	4	176	121	28977	321	252	birA	80	204	WP_100189960.1	30
1301	35.8255	35.652	62.8	6.19e-10	3	115	68	35652	321	220	birA	109	154	MBD9027914.1	43
1302	53.5826	28.488	62.4	6.56e-10	4	172	117	28488	321	252	birA	84	176	HBF06397.1	8
1303	55.1402	29.944	62.4	6.68e-10	5	177	118	29944	321	252	birA	80	194	SUB92574.1	20
1304	48.2866	28.387	62.4	6.83e-10	4	155	96	28387	321	255	birA	108	180	CCX67910.1	34
1305	55.1402	29.944	62.8	6.85e-10	5	177	118	29944	321	252	birA	80	204	WP_004366262.1	30
1306	76.947	27.126	62.4	6.94e-10	10	247	163	27126	321	321	birA	84	246	WP_025073020.1	8
1307	80.0623	26.848	62.4	7.09e-10	10	257	141	26848	321	316	birA	84	241	WP_022110065.1	8
1308	53.5826	29.07	62.4	7.15e-10	4	172	116	29070	321	252	birA	84	176	WP_153113103.1	8
1309	80.0623	26.848	62	7.23e-10	10	257	141	26848	321	316	birA	84	241	MBD9273309.1	8
1310	76.6355	26.423	62	7.31e-10	8	246	156	26423	321	316	birA	84	241	WP_118415687.1	8
1311	55.7632	28.492	62.4	7.5e-10	6	179	120	28492	321	263	birA	88	185	WP_025816596.1	12
1312	53.5826	29.651	62	7.52e-10	4	172	115	29651	321	252	birA	84	176	WP_154480186.1	8
1313	53.5826	29.651	62	7.6e-10	4	172	115	29651	321	252	birA	84	176	RGS47353.1	8
1314	76.947	27.126	62	8.24e-10	10	247	163	27126	321	321	birA	84	247	WP_081411476.1	9
1315	76.6355	26.423	62	8.47e-10	8	246	166	26423	321	321	birA	84	246	WP_039868155.1	8
1316	53.5826	29.651	62	9.1e-10	4	172	115	29651	321	252	birA	84	176	QNT67691.1	8
1317	76.6355	26.423	62	9.23e-10	8	246	166	26423	321	321	birA	84	247	EFA98032.1	9
1318	54.5171	30.857	62	9.37e-10	5	175	111	30857	321	252	birA	84	188	CDA42591.1	18
1403	84.0909	46.486	182	1.22e-56	2	185	96	46486	220	193	can	11	197	WP_029904548.1	14
1404	74.0909	28.834	63.2	1.01e-10	7	163	104	28834	220	186	can	30	237	WP_156032761.1	81
1466	75.7282	35.897	138	4.43e-35	12	312	167	35897	412	291	cca	1	329	WP_091820964.1	30
1467	94.9029	31.714	138	7.47e-35	17	391	212	31714	412	360	cca	1	396	CDA42335.1	30
1468	101.699	31.504	136	2.93e-34	20	419	237	31504	412	390	cca	1	427	WP_022315662.1	30
1469	76.2136	36.624	134	1.11e-33	15	314	162	36624	412	291	cca	1	329	CCY16361.1	30
1470	95.6311	32.234	133	1.67e-33	20	394	217	32234	412	365	cca	1	402	WP_044072545.1	30
1471	95.6311	31.218	134	1.88e-33	18	394	225	31218	412	365	cca	1	406	WP_028911420.1	30
1472	80.0971	33.03	133	2.61e-33	14	330	175	33030	412	305	cca	4	338	CCX43715.1	27
1473	78.8835	34.462	134	3.22e-33	14	325	177	34462	412	301	cca	1	348	CDE57596.1	36
1474	94.9029	31.969	133	3.47e-33	17	391	211	31969	412	360	cca	1	396	CDE87199.1	30
1475	96.3592	30.479	133	4.56e-33	18	397	224	30479	412	365	cca	1	406	WP_074761046.1	30
1476	96.3592	30.479	132	5.45e-33	18	397	224	30479	412	365	cca	1	406	WP_013065599.1	30
1477	102.67	30.496	132	5.95e-33	18	423	236	30496	412	390	cca	1	427	WP_053397392.1	30
1478	102.67	30.496	132	6.01e-33	18	423	236	30496	412	390	cca	1	427	CCX67879.1	30
1479	75.7282	34.295	132	7.94e-33	12	312	172	34295	412	291	cca	1	329	WP_025792069.1	30
1480	105.097	30.485	132	9.4e-33	16	433	253	30485	412	405	cca	1	442	MBD8998078.1	30
1481	96.3592	30.479	132	1.12e-32	18	397	224	30479	412	365	cca	1	406	WP_028908367.1	30
1482	96.3592	30.479	131	1.73e-32	18	397	224	30479	412	365	cca	1	406	WP_033149666.1	30
1483	101.699	30.31	131	2.08e-32	19	419	238	30310	412	388	cca	1	425	CCY84075.1	30
1484	92.9612	32.376	129	2.59e-32	16	383	214	32376	412	354	cca	1	396	CCY65293.1	30
1485	100.485	30.918	130	4.55e-32	18	414	240	30918	412	390	cca	4	427	WP_094384259.1	33
1486	96.3592	30.227	130	4.65e-32	18	397	225	30227	412	365	cca	1	406	WP_091859980.1	30
1487	101.942	30.952	130	4.83e-32	17	420	238	30952	412	390	cca	1	427	CCX66906.1	30
1488	80.0971	31.212	129	9.3e-32	12	330	189	31212	412	301	cca	1	350	WP_092067081.1	30
1489	105.097	30.023	129	9.88e-32	17	433	255	30023	412	405	cca	1	442	WP_009227214.1	30
1490	105.583	29.195	129	1.12e-31	18	435	256	29195	412	405	cca	1	442	WP_036896683.1	30
1491	79.8544	33.131	128	1.58e-31	15	329	176	33131	412	305	cca	4	338	CDE40682.1	27
1492	76.2136	35.987	128	1.99e-31	14	314	164	35987	412	291	cca	1	329	WP_094388593.1	30
1493	76.2136	35.987	128	1.99e-31	14	314	164	35987	412	291	cca	1	329	WP_022309800.1	30
1494	105.097	30.023	128	1.99e-31	17	433	255	30023	412	405	cca	1	442	RKW52363.1	30
1495	76.2136	35.987	128	2.15e-31	14	314	164	35987	412	291	cca	1	329	WP_094422940.1	30
1496	76.2136	35.987	128	2.15e-31	14	314	164	35987	412	291	cca	1	329	WP_094467108.1	30
1497	104.854	29.63	128	2.25e-31	17	432	258	29630	412	405	cca	1	442	WP_018363077.1	30
1498	101.942	30.476	127	3.25e-31	19	420	240	30476	412	390	cca	1	427	WP_107619852.1	30
1499	75.4854	34.727	127	3.3e-31	12	311	172	34727	412	291	cca	1	329	WP_008822103.1	30
1500	76.2136	32.484	127	3.54e-31	14	314	175	32484	412	291	cca	1	329	MBD9015380.1	30
1501	75.4854	34.727	127	4.11e-31	14	311	166	34727	412	291	cca	4	329	WP_110370022.1	33
1502	101.699	28.64	127	4.8e-31	17	419	249	28640	412	390	cca	1	427	WP_036862226.1	30
1503	76.2136	35.669	127	4.82e-31	14	314	165	35669	412	291	cca	1	329	WP_092111965.1	30
1504	91.9903	30.607	127	5.07e-31	16	379	216	30607	412	350	cca	1	390	WP_028902195.1	30
1505	103.155	31.765	127	5.09e-31	20	425	238	31765	412	395	cca	1	432	WP_068857123.1	30
1506	103.155	31.765	127	5.51e-31	20	425	238	31765	412	395	cca	1	432	OKZ25901.1	30
1507	101.942	30.714	127	5.79e-31	20	420	235	30714	412	388	cca	1	425	WP_172275223.1	30
1508	105.097	30.023	127	6.26e-31	17	433	255	30023	412	405	cca	1	442	WP_036856632.1	30
1509	75.9709	31.629	127	6.99e-31	12	313	179	31629	412	291	cca	1	329	WP_153091183.1	30
1510	107.039	29.252	126	1.2e-30	19	441	255	29252	412	405	cca	1	449	MBD9245930.1	30
1511	75.7282	34.615	125	1.58e-30	13	312	171	34615	412	291	cca	1	329	WP_036870097.1	30
1512	100.971	31.25	125	1.64e-30	20	416	236	31250	412	390	cca	4	440	EFC67760.1	46
1513	101.214	30.695	125	1.72e-30	16	417	243	30695	412	390	cca	1	427	WP_004368464.1	30
1514	75.4854	33.441	125	1.93e-30	11	311	176	33441	412	291	cca	1	329	WP_004383829.1	30
1515	91.2621	30.585	125	2.31e-30	16	376	214	30585	412	350	cca	4	390	WP_033148205.1	33
1516	104.854	29.398	125	2.32e-30	16	432	259	29398	412	405	cca	1	442	WP_004352382.1	30
1517	100.971	31.25	125	2.65e-30	20	416	236	31250	412	390	cca	4	427	WP_044078269.1	33
1518	100.971	31.25	125	2.65e-30	20	416	236	31250	412	390	cca	4	427	WP_044078269.1	33
1519	78.1553	32.609	125	3.03e-30	14	322	172	32609	412	291	cca	1	337	WP_024989653.1	30
1520	106.553	28.929	124	3.79e-30	19	439	259	28929	412	405	cca	1	449	WP_094880364.1	30
1521	100.728	31.084	124	4.73e-30	19	415	238	31084	412	390	cca	4	427	WP_019187138.1	33
1522	100.728	31.084	124	5.87e-30	19	415	238	31084	412	390	cca	4	427	WP_070723018.1	33
1523	105.34	29.032	124	5.88e-30	16	434	258	29032	412	405	cca	1	442	WP_172344774.1	30
1524	75.9709	31.31	124	5.95e-30	12	313	180	31310	412	291	cca	1	329	WP_119248736.1	30
1525	76.9417	32.177	124	6.12e-30	14	317	172	32177	412	291	cca	1	329	WP_153079714.1	30
1526	77.4272	33.542	124	6.31e-30	13	319	172	33542	412	291	cca	1	336	WP_118355617.1	30
1527	77.4272	33.542	124	6.5e-30	13	319	172	33542	412	291	cca	1	336	HAH76862.1	30
1528	76.4563	33.333	124	6.6e-30	13	315	171	33333	412	291	cca	1	329	WP_025002076.1	30
1529	76.699	31.962	124	8.51e-30	14	316	174	31962	412	291	cca	1	329	MBD9300063.1	30
1530	94.4175	31.362	124	8.79e-30	17	389	210	31362	412	354	cca	1	396	WP_104404677.1	30
1531	102.427	28.436	123	9.2e-30	18	422	246	28436	412	390	cca	1	427	CDD19500.1	30
1532	104.854	29.167	123	1.02e-29	16	432	260	29167	412	405	cca	1	442	WP_118866556.1	30
1533	77.4272	33.542	123	1.05e-29	13	319	172	33542	412	291	cca	1	336	WP_007901937.1	30
1534	78.1553	30.745	123	1.1e-29	12	322	187	30745	412	295	cca	1	342	WP_073204041.1	30
1535	75.4854	33.441	123	1.26e-29	11	311	176	33441	412	291	cca	1	329	WP_018910300.1	30
1536	101.456	30.383	123	1.31e-29	18	418	243	30383	412	390	cca	1	427	WP_023984800.1	30
1537	102.184	30.404	123	1.32e-29	19	421	239	30404	412	390	cca	1	427	WP_104369502.1	30
1538	102.184	30.404	123	1.32e-29	19	421	239	30404	412	390	cca	1	427	WP_172204158.1	30
1539	75.9709	31.31	123	1.52e-29	12	313	180	31310	412	291	cca	1	329	WP_089544060.1	30
1540	75.2427	32.581	123	1.59e-29	10	310	180	32581	412	291	cca	1	329	WP_155716199.1	30
1541	75.9709	31.31	123	1.62e-29	12	313	180	31310	412	291	cca	1	329	WP_153097765.1	30
1542	77.6699	33.438	122	1.85e-29	13	320	171	33438	412	291	cca	1	336	CDB05343.1	30
1543	76.9417	32.177	122	1.93e-29	14	317	172	32177	412	291	cca	1	329	WP_153095192.1	30
1544	101.699	30.072	122	2.08e-29	19	419	243	30072	412	390	cca	1	427	WP_025065432.1	30
1545	75.4854	33.441	122	2.12e-29	11	311	176	33441	412	291	cca	1	329	WP_009434434.1	30
1546	75.4854	33.441	122	2.12e-29	11	311	176	33441	412	291	cca	1	329	WP_009434434.1	30
1547	75.9709	31.31	122	2.35e-29	12	313	180	31310	412	291	cca	1	329	MBD9056598.1	30
1548	102.913	29.481	122	2.42e-29	18	424	246	29481	412	390	cca	1	434	WP_106811771.1	30
1549	76.9417	31.861	122	2.71e-29	14	317	173	31861	412	291	cca	1	329	WP_118255015.1	30
1550	76.9417	34.069	122	2.79e-29	13	317	174	34069	412	295	cca	1	333	WP_009161752.1	30
1551	75.9709	31.31	122	2.85e-29	12	313	180	31310	412	291	cca	1	329	WP_117661359.1	30
1552	75.4854	34.084	122	2.97e-29	14	311	168	34084	412	291	cca	4	342	KDR52036.1	46
1553	101.942	30.476	122	2.98e-29	20	420	240	30476	412	390	cca	1	427	WP_006950181.1	30
1554	75.4854	34.084	122	3.11e-29	14	311	168	34084	412	291	cca	4	329	WP_044070693.1	33
1555	75.9709	32.907	122	3.13e-29	12	313	175	32907	412	291	cca	1	329	WP_025837325.1	30
1556	75.4854	34.084	122	3.21e-29	14	311	168	34084	412	291	cca	4	342	EEX54470.1	46
1557	75.4854	34.084	122	3.36e-29	14	311	168	34084	412	291	cca	4	329	WP_018967696.1	33
1558	104.369	28.372	122	3.52e-29	16	430	266	28372	412	405	cca	1	442	CCZ13576.1	30
1559	101.214	29.976	122	3.59e-29	17	417	246	29976	412	390	cca	1	427	WP_040554835.1	30
1560	101.214	29.976	122	3.64e-29	17	417	246	29976	412	390	cca	1	438	EGC20266.1	41
1561	83.4951	32.849	122	3.85e-29	16	344	189	32849	412	320	cca	1	355	WP_024991797.1	30
1562	91.9903	28.76	122	4.01e-29	13	379	227	28760	412	354	cca	4	396	MBD9027097.1	33
1563	76.4563	31.746	122	4.21e-29	14	315	176	31746	412	291	cca	1	329	WP_117727313.1	30
1564	76.9417	31.861	122	4.3e-29	14	317	173	31861	412	291	cca	1	329	RGS47335.1	30
1565	101.456	27.033	121	4.37e-29	16	418	257	27033	412	390	cca	1	427	WP_008450067.1	30
1566	76.9417	31.861	121	4.69e-29	14	317	173	31861	412	291	cca	1	329	MBD9060120.1	30
1567	75.9709	33.866	121	4.72e-29	13	313	172	33866	412	291	cca	1	329	WP_028897938.1	30
1568	76.2136	31.529	121	4.97e-29	14	314	178	31529	412	291	cca	1	329	WP_118080689.1	30
1569	76.4563	31.746	121	4.97e-29	14	315	176	31746	412	291	cca	1	329	HAH90536.1	30
1570	76.4563	31.746	121	5.22e-29	14	315	176	31746	412	291	cca	1	329	WP_118415723.1	30
1571	83.4951	32.849	121	5.32e-29	16	344	189	32849	412	320	cca	1	355	WP_039875484.1	30
1572	104.126	27.972	121	5.65e-29	16	429	246	27972	412	390	cca	1	434	WP_094391285.1	30
1573	101.456	27.033	121	5.74e-29	16	418	257	27033	412	390	cca	1	427	WP_060933461.1	30
1574	76.4563	31.746	121	5.87e-29	14	315	176	31746	412	291	cca	1	329	WP_144151949.1	30
1575	76.9417	31.546	121	6.35e-29	14	317	174	31546	412	291	cca	1	329	WP_006849062.1	30
1576	76.9417	31.861	121	6.35e-29	14	317	173	31861	412	291	cca	1	329	RHK48622.1	30
1577	101.456	27.033	121	6.39e-29	16	418	257	27033	412	390	cca	1	427	WP_019035670.1	30
1578	76.9417	31.546	121	6.41e-29	14	317	174	31546	412	291	cca	1	329	WP_022122075.1	30
1579	76.4563	31.746	121	6.54e-29	14	315	176	31746	412	291	cca	1	329	WP_118190947.1	30
1580	76.9417	31.861	121	6.54e-29	14	317	173	31861	412	291	cca	1	329	RGX96552.1	30
1581	76.4563	31.111	121	6.59e-29	13	315	178	31111	412	291	cca	1	329	WP_134844083.1	30
1582	101.942	30.476	121	6.6e-29	20	420	240	30476	412	390	cca	1	443	ERK04057.1	46
1583	75.7282	33.013	121	6.92e-29	12	312	176	33013	412	291	cca	1	329	WP_021671117.1	30
1584	76.9417	31.861	121	7e-29	14	317	173	31861	412	291	cca	1	329	WP_153086889.1	30
1585	75.9709	30.99	121	7.43e-29	12	313	181	30990	412	291	cca	1	329	MBD8993675.1	30
1586	76.9417	33.754	121	7.49e-29	13	317	175	33754	412	295	cca	1	333	RKW61643.1	30
1587	75.9709	32.588	121	7.55e-29	12	313	176	32588	412	291	cca	1	329	WP_120173820.1	30
1588	101.214	30.456	121	7.55e-29	19	417	240	30456	412	388	cca	1	425	WP_094378675.1	30
1589	76.9417	31.861	121	7.57e-29	14	317	173	31861	412	291	cca	1	329	WP_117695521.1	30
1590	76.4563	31.746	121	7.95e-29	14	315	176	31746	412	291	cca	1	329	WP_153093223.1	30
1591	104.369	28.14	120	9.54e-29	16	430	267	28140	412	405	cca	1	442	MBD9229708.1	30
1592	76.4563	30.794	120	1.26e-28	13	315	179	30794	412	291	cca	1	329	WP_118117061.1	30
1593	75.9709	32.907	120	1.28e-28	12	313	175	32907	412	291	cca	1	329	WP_008122816.1	30
1594	76.4563	30.794	120	1.36e-28	13	315	179	30794	412	291	cca	1	329	MBD8971738.1	30
1595	103.641	30.445	120	1.37e-28	18	427	239	30445	412	390	cca	1	435	WP_028898584.1	30
1596	75.9709	32.907	120	1.51e-28	12	313	175	32907	412	291	cca	1	329	WP_036928289.1	30
1597	75.9709	32.907	120	1.6e-28	12	313	175	32907	412	291	cca	1	329	WP_102187609.1	30
1598	91.5049	31.565	120	1.67e-28	18	377	213	31565	412	351	cca	1	387	CDA95620.1	30
1599	76.4563	30.794	120	1.72e-28	13	315	179	30794	412	291	cca	1	329	CDA57147.1	30
1600	76.9417	31.546	120	1.79e-28	14	317	174	31546	412	291	cca	1	329	WP_118200974.1	30
1601	78.6408	33.333	120	1.89e-28	15	324	175	33333	412	295	cca	1	341	WP_007574530.1	30
1602	75.9709	32.907	119	2.19e-28	12	313	175	32907	412	291	cca	1	329	WP_103002964.1	30
1603	75.9709	32.907	119	2.21e-28	12	313	175	32907	412	291	cca	1	329	WP_025072126.1	30
1604	75.7282	31.41	119	2.56e-28	12	312	181	31410	412	291	cca	1	329	WP_036878410.1	30
1605	76.9417	32.177	119	2.61e-28	14	317	172	32177	412	291	cca	1	329	MBD9074263.1	30
1606	76.9417	32.177	119	2.63e-28	14	317	172	32177	412	291	cca	1	329	MBD9260269.1	30
1607	76.9417	32.177	119	2.74e-28	14	317	172	32177	412	291	cca	1	329	WP_158463135.1	30
1608	78.1553	33.54	119	2.76e-28	14	322	167	33540	412	291	cca	4	341	WP_021589112.1	33
1609	78.6408	32.099	119	3.2e-28	12	324	175	32099	412	291	cca	1	341	WP_107581272.1	30
1610	106.796	29.773	119	3.6e-28	20	440	241	29773	412	405	cca	4	442	WP_172177201.1	33
1611	75.9709	32.588	119	3.6e-28	12	313	176	32588	412	291	cca	1	329	WP_050696041.1	30
1612	75.9709	32.588	119	3.74e-28	12	313	176	32588	412	291	cca	1	329	WP_036922547.1	30
1613	75.9709	32.588	119	3.78e-28	12	313	176	32588	412	291	cca	1	329	WP_036865851.1	30
1614	75.9709	32.588	119	3.97e-28	12	313	176	32588	412	291	cca	1	329	WP_013263803.1	30
1615	75.9709	32.268	119	4.46e-28	12	313	177	32268	412	291	cca	1	329	WP_009012314.1	30
1616	103.398	29.812	119	5.41e-28	17	426	243	29812	412	390	cca	1	435	WP_025070615.1	30
1617	76.9417	31.23	118	5.63e-28	14	317	175	31230	412	291	cca	1	329	WP_117587507.1	30
1618	79.1262	30.368	118	5.63e-28	11	326	178	30368	412	295	cca	1	337	WP_103914910.1	30
1619	75.9709	32.588	118	6.45e-28	12	313	176	32588	412	291	cca	1	329	WP_004360498.1	30
1620	75.9709	32.268	118	6.51e-28	12	313	177	32268	412	291	cca	1	329	WP_107624816.1	30
1621	75.9709	32.268	118	7.69e-28	12	313	177	32268	412	291	cca	1	329	WP_089365826.1	30
1622	78.6408	32.716	118	8.8e-28	13	324	184	32716	412	305	cca	4	344	CDF22391.1	33
1623	78.8835	32.923	118	8.93e-28	14	325	171	32923	412	291	cca	1	341	WP_025880355.1	30
1624	76.2136	30.892	117	1.08e-27	13	314	180	30892	412	291	cca	1	329	WP_153124481.1	30
1625	76.4563	32.063	117	1.35e-27	14	315	175	32063	412	291	cca	1	329	HCD65147.1	30
1626	103.641	30.211	117	1.44e-27	18	427	240	30211	412	390	cca	1	435	RKW48450.1	30
1627	103.641	30.211	117	1.53e-27	18	427	240	30211	412	390	cca	1	435	WP_004380340.1	30
1628	100.971	29.327	117	1.86e-27	17	416	250	29327	412	390	cca	1	427	WP_077197523.1	30
1629	75.7282	31.731	117	1.87e-27	12	312	180	31731	412	291	cca	1	333	WP_029905124.1	34
1630	105.583	30.805	116	2.46e-27	20	435	249	30805	412	405	cca	1	442	WP_025876292.1	30
1631	79.1262	33.436	117	2.58e-27	16	326	172	33436	412	295	cca	1	341	HCC87483.1	30
1632	76.9417	30.915	116	3.29e-27	10	317	188	30915	412	295	cca	1	337	WP_091901407.1	30
1633	75.9709	32.588	116	4.08e-27	13	313	176	32588	412	291	cca	1	329	WP_006953740.1	30
1634	105.583	30.805	115	5.35e-27	20	435	249	30805	412	405	cca	1	442	WP_060939964.1	30
1635	79.1262	30.061	115	5.97e-27	14	326	187	30061	412	303	cca	4	337	CCZ13328.1	27
1636	76.2136	32.166	115	6.42e-27	13	314	176	32166	412	291	cca	1	329	WP_102696857.1	30
1637	76.2136	32.166	115	8.02e-27	13	314	176	32166	412	291	cca	1	329	WP_036872731.1	30
1638	85.6796	29.745	115	8.57e-27	13	353	192	29745	412	320	cca	1	359	WP_091842625.1	30
1639	81.068	32.335	115	1.14e-26	16	334	179	32335	412	301	cca	1	349	WP_019966897.1	30
1640	102.67	28.605	115	1.15e-26	16	423	248	28605	412	390	cca	1	431	WP_091957383.1	30
1641	109.466	29.047	114	1.51e-26	22	451	233	29047	412	390	cca	4	460	WP_116616786.1	33
1642	76.2136	31.847	114	1.61e-26	13	314	177	31847	412	291	cca	1	329	WP_004348526.1	30
1643	76.2136	31.847	114	2.71e-26	13	314	177	31847	412	291	cca	1	329	WP_023056663.1	30
1644	81.3107	30.746	114	2.85e-26	14	335	196	30746	412	314	cca	1	349	WP_100019583.1	30
1645	81.3107	30.746	113	3.33e-26	14	335	196	30746	412	314	cca	1	349	WP_004365639.1	30
1646	75.9709	32.268	113	4.75e-26	13	313	177	32268	412	291	cca	1	329	WP_100327937.1	30
1647	103.641	29.508	113	4.84e-26	21	427	243	29508	412	390	cca	1	435	WP_018463100.1	30
1648	75.9709	32.588	113	5.23e-26	13	313	176	32588	412	291	cca	1	329	WP_100356106.1	30
1649	81.068	31.437	113	5.37e-26	15	334	182	31437	412	301	cca	1	349	WP_008565387.1	30
1650	75.7282	31.41	112	5.65e-26	12	312	181	31410	412	291	cca	1	329	WP_100023041.1	30
1651	75.9709	32.588	112	5.87e-26	13	313	176	32588	412	291	cca	1	329	WP_097655730.1	30
1652	75.9709	32.268	112	6.47e-26	13	313	177	32268	412	291	cca	1	329	WP_044048011.1	30
1653	75.9709	32.268	112	6.59e-26	13	313	177	32268	412	291	cca	1	329	WP_097646503.1	30
1654	75.9709	32.268	112	6.59e-26	13	313	177	32268	412	291	cca	1	329	WP_099976715.1	30
1655	75.7282	31.41	112	6.66e-26	12	312	181	31410	412	291	cca	1	329	WP_097550004.1	30
1656	75.9709	32.268	112	6.72e-26	13	313	177	32268	412	291	cca	1	329	WP_096406879.1	30
1657	75.9709	32.588	112	6.72e-26	13	313	176	32588	412	291	cca	1	329	WP_099995078.1	30
1658	75.9709	32.268	112	6.79e-26	13	313	177	32268	412	291	cca	1	329	WP_099984144.1	30
1659	75.9709	32.268	112	6.87e-26	13	313	177	32268	412	291	cca	1	326	AFJ08385.1	27
1660	75.9709	32.268	112	7.12e-26	13	313	177	32268	412	291	cca	1	329	WP_028904858.1	30
1661	75.9709	32.268	112	7.19e-26	13	313	177	32268	412	291	cca	1	329	WP_100370024.1	30
1662	75.9709	32.268	112	7.47e-26	13	313	177	32268	412	291	cca	1	329	WP_061869163.1	30
1663	75.7282	31.41	112	7.54e-26	12	312	181	31410	412	291	cca	1	329	WP_100356476.1	30
1664	75.7282	31.41	112	7.54e-26	12	312	181	31410	412	291	cca	1	329	WP_100014014.1	30
1665	75.7282	31.41	112	8.31e-26	12	312	181	31410	412	291	cca	1	329	WP_088400151.1	30
1666	79.6117	31.098	112	8.72e-26	14	328	183	31098	412	302	cca	1	337	CDE07694.1	27
1667	75.9709	31.629	112	9.06e-26	12	313	179	31629	412	291	cca	1	329	WP_024999037.1	30
1668	81.5534	31.548	112	9.5e-26	15	336	192	31548	412	314	cca	1	349	WP_004363282.1	30
1669	102.184	28.504	112	9.92e-26	18	421	247	28504	412	390	cca	1	427	WP_091818964.1	30
1670	75.7282	31.731	112	1.03e-25	12	312	180	31731	412	291	cca	1	329	WP_088438134.1	30
1671	104.612	28.77	112	1.14e-25	21	431	245	28770	412	392	cca	1	437	WP_004371649.1	30
1672	104.126	29.138	112	1.15e-25	21	429	242	29138	412	390	cca	1	435	WP_070692264.1	30
1673	101.456	28.469	111	1.5e-25	17	418	251	28469	412	390	cca	1	427	WP_091854208.1	30
1674	77.6699	32.5	111	1.66e-25	14	320	173	32500	412	291	cca	1	335	WP_028909723.1	30
1675	81.068	31.437	111	1.82e-25	15	334	182	31437	412	301	cca	1	349	WP_021824588.1	30
1676	104.126	28.904	111	1.87e-25	21	429	243	28904	412	390	cca	1	435	WP_070665692.1	30
1677	75.9709	32.268	111	1.97e-25	13	313	177	32268	412	291	cca	1	329	WP_045166692.1	30
1678	109.223	28.444	111	2.56e-25	20	450	243	28444	412	390	cca	1	460	HCJ46778.1	30
1679	83.7379	32.174	111	2.75e-25	17	345	162	32174	412	291	cca	4	362	WP_036891637.1	33
1680	101.214	29.017	110	2.76e-25	18	417	250	29017	412	390	cca	1	427	WP_021668744.1	30
1681	81.068	31.437	110	3.02e-25	15	334	182	31437	412	301	cca	1	349	WP_007134515.1	30
1682	101.214	29.017	110	3.04e-25	18	417	250	29017	412	390	cca	1	427	WP_036884714.1	30
1683	101.214	29.017	110	3.25e-25	18	417	250	29017	412	390	cca	1	427	WP_004357499.1	30
1684	103.398	28.404	110	3.4e-25	19	426	245	28404	412	388	cca	1	433	WP_125234084.1	30
1685	104.126	28.671	110	6.14e-25	21	429	244	28671	412	390	cca	1	435	WP_004377014.1	30
1686	81.3107	30.448	109	6.3e-25	14	335	197	30448	412	314	cca	1	349	WP_023926206.1	30
1687	105.097	26.79	109	8.24e-25	19	433	253	26790	412	390	cca	1	441	WP_094448850.1	30
1688	53.8835	33.784	108	9.38e-25	8	222	129	33784	412	291	cca	81	238	RKW51108.1	24
1689	104.126	28.671	109	1.1e-24	21	429	244	28671	412	390	cca	1	435	WP_018920462.1	30
1690	110.194	27.974	109	1.23e-24	18	454	239	27974	412	390	cca	1	459	WP_027449920.1	30
1691	105.34	28.802	108	2.46e-24	20	434	241	28802	412	390	cca	4	445	MBD9042052.1	33
1692	105.34	28.802	108	2.53e-24	20	434	241	28802	412	390	cca	4	445	HAM29619.1	33
1693	105.34	28.802	107	3.54e-24	20	434	241	28802	412	390	cca	4	445	MBD9201325.1	33
1694	105.583	29.195	107	3.74e-24	21	435	238	29195	412	390	cca	4	445	HAE07862.1	33
1695	76.2136	32.803	107	4.82e-24	14	314	174	32803	412	291	cca	1	329	WP_025000990.1	30
1696	83.9806	30.636	107	5.47e-24	14	346	172	30636	412	291	cca	1	364	EFA43311.1	32
1697	83.9806	30.636	107	6.06e-24	14	346	172	30636	412	291	cca	1	362	WP_044123463.1	30
1698	76.4563	31.746	106	7.76e-24	13	315	176	31746	412	291	cca	1	329	WP_006044578.1	30
1699	104.369	27.907	106	1.44e-23	18	430	245	27907	412	390	cca	2	436	WP_004343539.1	31
1700	104.369	27.907	105	1.67e-23	18	430	245	27907	412	390	cca	2	444	SUB80851.1	39
1701	104.369	27.907	105	1.68e-23	18	430	245	27907	412	390	cca	2	436	WP_115154083.1	31
1702	85.4369	29.261	105	1.89e-23	15	352	200	29261	412	314	cca	1	370	WP_172180928.1	30
1703	104.369	27.907	105	2.01e-23	18	430	245	27907	412	390	cca	2	436	WP_004343962.1	31
1704	53.6408	33.032	105	2.23e-23	8	221	128	33032	412	291	cca	83	329	WP_130828485.1	117
1705	113.35	26.981	104	7.35e-23	18	467	239	26981	412	390	cca	1	471	WP_027454993.1	30
1706	108.252	27.578	103	7.49e-23	19	446	245	27578	412	390	cca	1	453	HBN46273.1	30
1707	102.913	27.358	103	7.71e-23	18	424	231	27358	412	365	cca	1	435	WP_027952032.1	30
1708	79.3689	28.746	102	9.8e-23	15	327	195	28746	412	388	cca	83	364	WP_126679439.1	55
1709	102.913	27.358	103	1.02e-22	18	424	231	27358	412	365	cca	1	435	WP_015310576.1	30
1710	75.9709	31.629	103	1.13e-22	13	313	179	31629	412	291	cca	1	329	WP_115083472.1	30
1711	101.456	27.751	103	1.28e-22	18	418	254	27751	412	390	cca	1	427	WP_094401508.1	30
1712	102.913	27.358	103	1.43e-22	18	424	231	27358	412	365	cca	1	456	EGQ14087.1	51
1713	110.437	29.011	102	3.06e-22	20	455	233	29011	412	390	cca	1	459	MBA7487891.1	30
1714	101.942	28.333	100	9.16e-22	18	420	211	28333	412	350	cca	1	429	CCY03047.1	30
1715	109.466	27.051	100	1.71e-21	18	451	247	27051	412	390	cca	1	459	MBB1550526.1	30
1716	81.5534	29.464	98.2	5.53e-21	17	336	192	29464	412	311	cca	3	343	WP_044080550.1	26
1717	109.466	27.273	97.8	1.02e-20	18	451	246	27273	412	390	cca	1	459	MBB1538328.1	30
1718	109.223	27.111	95.9	4.43e-20	18	450	248	27111	412	390	cca	1	459	MBB1530982.1	30
1719	50	35.437	88.2	1.01e-18	10	206	104	35437	412	188	cca	1	224	MQO97613.1	30
1720	75.2427	29.032	86.3	2.43e-17	14	310	183	29032	412	395	cca	104	301	CCZ13517.1	11
1759	97.1519	64.169	422	1.82e-148	0	307	110	64169	316	316	coaA	10	313	WP_029904937.1	7
1869	92.4528	42.177	124	7.52e-36	1	147	84	42177	159	147	coaD	1	146	WP_104403914.1	1
1870	91.8239	40.411	124	8.76e-36	1	146	86	40411	159	149	coaD	4	147	WP_004382987.1	3
1871	91.8239	40.411	124	1.49e-35	1	146	86	40411	159	149	coaD	4	147	WP_009435467.1	3
1872	93.7107	40.94	122	3.92e-35	1	149	87	40940	159	149	coaD	1	148	MBD9027708.1	1
1873	91.8239	40.411	122	4.78e-35	1	146	86	40411	159	149	coaD	4	147	WP_155714996.1	3
1874	91.8239	40.411	122	4.88e-35	1	146	86	40411	159	149	coaD	4	147	WP_018910825.1	3
1875	94.3396	37.333	120	4.62e-34	1	150	93	37333	159	150	coaD	1	149	WP_029904721.1	1
1876	91.195	40	119	1.07e-33	1	145	86	40000	159	147	coaD	3	145	CDE86005.1	2
1877	91.195	38.621	118	1.67e-33	1	145	88	38621	159	149	coaD	5	147	WP_174262606.1	4
1878	91.195	38.621	118	2.02e-33	1	145	88	38621	159	149	coaD	5	155	WP_006044002.1	12
1879	91.195	37.931	118	2.22e-33	1	145	89	37931	159	149	coaD	5	155	WP_100189665.1	12
1880	91.195	38.621	118	2.3e-33	1	145	88	38621	159	149	coaD	5	155	RKW53155.1	12
1881	91.195	39.31	118	2.98e-33	1	145	87	39310	159	149	coaD	5	155	WP_024999085.1	12
1882	91.8239	39.041	118	3.55e-33	1	146	88	39041	159	148	coaD	3	146	CDA42032.1	2
1883	93.0818	37.838	117	3.91e-33	1	148	91	37838	159	149	coaD	2	155	WP_096405694.1	9
1884	93.0818	37.838	117	3.91e-33	1	148	91	37838	159	149	coaD	2	155	WP_096405694.1	9
1885	93.0818	37.838	117	4.5e-33	1	148	91	37838	159	149	coaD	2	155	WP_112200222.1	9
1886	92.4528	40.816	117	5.51e-33	1	147	86	40816	159	149	coaD	3	147	WP_040556209.1	2
1887	93.0818	37.162	117	6.37e-33	1	148	92	37162	159	149	coaD	2	155	WP_028905598.1	9
1888	91.195	37.931	117	6.44e-33	1	145	89	37931	159	149	coaD	5	155	WP_099836553.1	12
1889	93.0818	37.162	117	7.42e-33	1	148	92	37162	159	149	coaD	2	155	WP_097549465.1	9
1890	93.0818	37.162	117	7.53e-33	1	148	92	37162	159	149	coaD	2	155	WP_100019278.1	9
1891	91.8239	38.356	117	8.09e-33	1	146	89	38356	159	147	coaD	2	153	WP_088438913.1	9
1892	92.4528	36.735	117	8.84e-33	1	147	92	36735	159	147	coaD	1	153	CDF21783.1	8
1893	89.9371	38.462	117	9.32e-33	1	143	87	38462	159	147	coaD	5	153	WP_044048076.1	12
1894	92.4528	40.816	117	9.56e-33	1	147	86	40816	159	149	coaD	3	170	EFL45047.1	25
1895	92.4528	38.776	116	1.02e-32	1	147	89	38776	159	149	coaD	3	147	WP_036862959.1	2
1896	93.0818	37.838	116	1.1e-32	1	148	91	37838	159	149	coaD	2	155	WP_124139742.1	9
1897	89.9371	38.462	117	1.22e-32	1	143	87	38462	159	147	coaD	5	170	AFJ09467.1	29
1898	91.8239	37.671	116	1.25e-32	1	146	90	37671	159	147	coaD	2	153	WP_097646484.1	9
1899	92.4528	40.816	116	1.27e-32	1	147	86	40816	159	149	coaD	3	147	WP_025064542.1	2
1900	89.9371	38.462	116	1.29e-32	1	143	87	38462	159	147	coaD	5	153	WP_100015521.1	12
1901	92.4528	40.816	116	1.36e-32	1	147	86	40816	159	149	coaD	3	155	SUB84375.1	10
1902	90.566	39.583	116	1.37e-32	1	144	86	39583	159	148	coaD	5	150	WP_025884344.1	8
1903	93.0818	36.486	116	1.69e-32	1	148	93	36486	159	149	coaD	2	155	WP_061868513.1	9
1904	91.8239	37.671	116	1.77e-32	1	146	90	37671	159	147	coaD	2	153	WP_045166611.1	9
1905	92.4528	40.816	116	1.89e-32	1	147	86	40816	159	149	coaD	3	170	ERJ76027.1	25
1906	89.9371	38.462	116	2.22e-32	1	143	87	38462	159	147	coaD	5	170	KJJ88277.1	29
1907	89.9371	39.161	115	3.32e-32	1	143	86	39161	159	147	coaD	5	145	WP_025875917.1	4
1908	89.9371	39.161	115	4.04e-32	1	143	86	39161	159	147	coaD	5	145	WP_060940300.1	4
1909	89.9371	38.462	115	4.7e-32	1	143	87	38462	159	147	coaD	5	153	WP_023926496.1	12
1910	92.4528	38.776	115	4.71e-32	1	147	89	38776	159	149	coaD	3	147	WP_013264052.1	2
1911	89.9371	36.364	114	6.99e-32	1	143	90	36364	159	147	coaD	5	149	WP_103002499.1	8
1912	92.4528	37.415	114	7.35e-32	1	147	91	37415	159	149	coaD	3	147	WP_004358879.1	2
1913	91.8239	36.301	114	8.41e-32	1	146	92	36301	159	147	coaD	2	149	WP_036926043.1	5
1914	92.4528	37.415	114	9.18e-32	1	147	91	37415	159	147	coaD	1	146	CCY82479.1	1
1915	92.4528	38.776	114	1.03e-31	1	147	89	38776	159	149	coaD	3	147	WP_025839715.1	2
1916	89.9371	39.86	114	1.13e-31	1	143	85	39860	159	147	coaD	5	144	WP_094382758.1	3
1917	91.8239	40.411	114	1.17e-31	1	146	86	40411	159	148	coaD	3	146	WP_117653406.1	2
1918	92.4528	38.776	114	1.25e-31	1	147	89	38776	159	149	coaD	3	147	WP_107625129.1	2
1919	92.4528	38.776	114	1.28e-31	1	147	89	38776	159	149	coaD	3	147	WP_036921901.1	2
1920	92.4528	38.095	113	2.12e-31	1	147	90	38095	159	149	coaD	3	151	CCY66149.1	6
1921	91.8239	36.301	113	2.41e-31	1	146	92	36301	159	147	coaD	2	149	WP_102188940.1	5
1922	92.4528	38.776	113	2.67e-31	1	147	89	38776	159	149	coaD	3	147	WP_013670822.1	2
1923	89.9371	39.161	112	2.71e-31	1	143	86	39161	159	146	coaD	4	144	WP_018362166.1	3
1924	92.4528	38.776	112	2.89e-31	1	147	89	38776	159	149	coaD	3	147	WP_025002941.1	2
1925	93.0818	40.541	112	2.92e-31	3	148	85	40541	159	149	coaD	3	147	WP_036853358.1	2
1926	92.4528	39.456	112	3.05e-31	1	147	88	39456	159	149	coaD	3	147	WP_009011060.1	2
1927	89.9371	37.762	112	3.54e-31	1	143	88	37762	159	147	coaD	5	153	WP_004366969.1	12
1928	89.9371	37.762	112	4.21e-31	1	143	88	37762	159	147	coaD	5	153	WP_004363849.1	12
1929	91.8239	35.616	112	4.52e-31	1	146	93	35616	159	147	coaD	2	149	WP_025072183.1	5
1930	91.8239	36.301	112	4.62e-31	1	146	92	36301	159	147	coaD	2	149	WP_008123723.1	5
1931	92.4528	37.415	112	6.31e-31	1	147	91	37415	159	149	coaD	3	147	WP_021672501.1	2
1932	92.4528	37.415	112	6.91e-31	1	147	91	37415	159	147	coaD	1	146	WP_021855771.1	1
1933	92.4528	38.776	111	9.63e-31	1	147	89	38776	159	149	coaD	3	147	WP_089365363.1	2
1934	93.0818	39.865	111	9.95e-31	3	148	86	39865	159	149	coaD	3	147	WP_004353897.1	2
1935	89.9371	39.161	111	1.04e-30	1	143	86	39161	159	146	coaD	4	144	WP_009227968.1	3
1936	93.0818	39.865	111	1.33e-30	1	148	88	39865	159	148	coaD	1	147	WP_004344508.1	1
1937	91.8239	36.986	110	2.82e-30	1	146	91	36986	159	148	coaD	3	150	CCX64557.1	6
1938	93.0818	39.865	110	3.53e-30	1	148	88	39865	159	148	coaD	1	147	WP_007411439.1	1
1939	92.4528	34.694	110	3.6e-30	1	147	95	34694	159	147	coaD	1	146	CDA93484.1	1
1940	93.0818	37.838	110	3.74e-30	1	148	91	37838	159	152	coaD	5	150	WP_028910442.1	4
1941	95.5975	40.789	110	4.08e-30	6	152	79	40789	159	149	coaD	3	147	WP_029216314.1	2
1942	91.8239	39.726	109	7.91e-30	1	146	87	39726	159	148	coaD	3	146	EFC76246.1	2
1943	93.0818	39.189	109	8.71e-30	3	148	87	39189	159	149	coaD	3	147	WP_040554917.1	2
1944	92.4528	36.735	109	8.81e-30	1	147	92	36735	159	149	coaD	3	147	WP_120173473.1	2
1945	92.4528	36.054	108	1.4e-29	1	147	93	36054	159	149	coaD	3	147	WP_008823476.1	2
1946	92.4528	39.456	108	1.51e-29	1	147	88	39456	159	147	coaD	1	146	WP_172204256.1	1
1947	92.4528	36.735	108	1.57e-29	1	147	92	36735	159	151	coaD	5	149	WP_147785584.1	4
1948	92.4528	36.735	108	1.67e-29	1	147	92	36735	159	147	coaD	1	146	WP_125105448.1	1
1949	92.4528	36.735	108	1.91e-29	1	147	92	36735	159	151	coaD	5	149	WP_130830319.1	4
1950	93.7107	40.268	108	1.96e-29	1	149	88	40268	159	149	coaD	1	148	CCY15932.1	1
1951	92.4528	37.415	108	2.24e-29	1	147	91	37415	159	149	coaD	3	147	WP_036865682.1	2
1952	92.4528	37.415	108	2.45e-29	1	147	91	37415	159	149	coaD	3	147	WP_061314387.1	2
1953	91.195	35.172	108	2.49e-29	1	145	93	35172	159	147	coaD	3	145	WP_036899211.1	2
1954	91.195	38.621	107	3.03e-29	1	145	88	38621	159	147	coaD	3	145	WP_172174764.1	2
1955	93.0818	36.486	107	3.07e-29	1	148	93	36486	159	148	coaD	1	147	WP_106811082.1	1
1956	91.195	35.172	107	3.39e-29	1	145	93	35172	159	147	coaD	3	145	WP_025797321.1	2
1957	92.4528	36.735	107	3.54e-29	1	147	92	36735	159	149	coaD	3	147	WP_036862205.1	2
1958	89.9371	37.762	107	3.9e-29	1	143	88	37762	159	147	coaD	5	145	WP_006950839.1	4
1959	92.4528	36.735	107	4.03e-29	1	147	92	36735	159	149	coaD	3	147	WP_036886092.1	2
1960	91.195	39.31	107	4.67e-29	0	145	88	39310	159	147	coaD	3	146	WP_172181654.1	2
1961	92.4528	36.735	107	5.01e-29	1	147	92	36735	159	149	coaD	3	147	WP_061450441.1	2
1962	91.8239	37.671	107	5.13e-29	1	146	90	37671	159	148	coaD	3	146	WP_025816778.1	2
1963	91.195	34.483	107	5.58e-29	1	145	94	34483	159	147	coaD	3	145	WP_009161344.1	2
1964	93.0818	38.514	107	6.4e-29	2	148	88	38514	159	150	coaD	3	146	WP_107581460.1	2
1965	92.4528	38.776	107	7.06e-29	1	147	89	38776	159	147	coaD	1	146	WP_104369270.1	1
1966	94.3396	38.667	108	8.34e-29	3	150	89	38667	159	149	coaD	1	217	EGC21367.1	70
1967	92.4528	36.735	106	8.89e-29	1	147	92	36735	159	149	coaD	3	147	WP_004336447.1	2
1968	92.4528	36.735	106	9.57e-29	1	147	92	36735	159	149	coaD	3	147	WP_025077696.1	2
1969	89.9371	38.462	106	1e-28	1	143	87	38462	159	147	coaD	5	145	WP_022317392.1	4
1970	92.4528	37.415	106	1.08e-28	1	147	91	37415	159	149	coaD	3	147	CCZ12545.1	2
1971	93.0818	39.189	106	1.29e-28	1	148	89	39189	159	148	coaD	1	147	WP_115153802.1	1
1972	91.195	36.552	106	1.37e-28	1	145	91	36552	159	149	coaD	5	153	HAT61294.1	10
1973	92.4528	36.054	106	1.5e-28	1	147	93	36054	159	149	coaD	3	147	WP_048740946.1	2
1974	92.4528	37.415	105	1.58e-28	1	147	91	37415	159	149	coaD	3	147	MBD9229160.1	2
1975	90.566	38.194	105	1.59e-28	1	144	88	38194	159	148	coaD	5	146	WP_024990164.1	4
1976	92.4528	38.095	105	1.68e-28	1	147	90	38095	159	149	coaD	3	147	WP_077196994.1	2
1977	90.566	34.028	105	2.41e-28	1	144	94	34028	159	148	coaD	5	152	MBB1538505.1	10
1978	91.195	37.241	105	3.55e-28	1	145	90	37241	159	149	coaD	5	147	WP_094402333.1	4
1979	90.566	34.028	105	3.72e-28	1	144	94	34028	159	148	coaD	5	152	MBB1550211.1	10
1980	91.195	38.621	105	4.35e-28	1	145	88	38621	159	149	coaD	5	153	MBD9041290.1	10
1981	83.6478	39.85	105	4.98e-28	1	133	79	39850	159	137	coaD	5	135	WP_021590852.1	4
1982	93.0818	35.811	104	6.62e-28	1	148	94	35811	159	148	coaD	1	147	WP_006282764.1	1
1983	91.195	38.621	103	9.79e-28	1	145	88	38621	159	149	coaD	5	153	MBD9201097.1	10
1984	91.195	34.483	103	1.03e-27	1	145	94	34483	159	147	coaD	3	145	WP_172273074.1	2
1985	92.4528	34.694	103	1.06e-27	1	147	95	34694	159	147	coaD	1	146	WP_094879620.1	1
1986	91.8239	33.562	103	1.44e-27	1	146	96	33562	159	148	coaD	3	152	MBA7488797.1	8
1987	92.4528	34.014	102	2.39e-27	1	147	96	34014	159	147	coaD	1	146	WP_126678830.1	1
1988	91.8239	37.671	103	2.5e-27	2	146	89	37671	159	147	coaD	3	154	CCX43380.1	10
1989	89.9371	36.364	102	2.69e-27	1	143	90	36364	159	147	coaD	5	145	WP_172343513.1	4
1990	91.8239	39.041	102	3.24e-27	1	146	88	39041	159	147	coaD	2	147	CDE41911.1	3
1991	92.4528	35.374	102	4.06e-27	1	147	94	35374	159	149	coaD	3	147	WP_028897228.1	2
1992	92.4528	36.735	102	4.57e-27	1	147	92	36735	159	149	coaD	3	147	WP_091820715.1	2
1993	92.4528	34.014	102	4.63e-27	1	147	96	34014	159	149	coaD	3	147	WP_036870245.1	2
1994	91.8239	34.247	102	6.37e-27	1	146	95	34247	159	148	coaD	3	146	WP_027952989.1	2
1995	91.8239	34.247	102	6.79e-27	1	146	95	34247	159	148	coaD	3	150	WP_005845501.1	6
1996	91.195	34.483	101	9.71e-27	1	145	94	34483	159	147	coaD	3	145	WP_004369208.1	2
1997	92.4528	33.333	101	9.76e-27	1	147	97	33333	159	147	coaD	1	146	WP_125234485.1	1
1998	94.3396	34.667	101	9.87e-27	1	150	97	34667	159	150	coaD	1	149	CDB05586.1	1
1999	91.8239	34.932	100	1.63e-26	1	146	94	34932	159	148	coaD	3	146	RKW56941.1	2
2000	91.8239	34.932	100	1.78e-26	1	146	94	34932	159	148	coaD	3	150	WP_023057198.1	6
2001	92.4528	34.014	100	1.91e-26	1	147	96	34014	159	147	coaD	1	146	MBD9246125.1	1
2002	91.8239	34.932	100	2.02e-26	1	146	94	34932	159	148	coaD	3	150	WP_102696381.1	6
2003	92.4528	34.014	100	2.27e-26	1	147	96	34014	159	149	coaD	3	147	WP_025791312.1	2
2004	91.195	33.793	100	2.8e-26	1	145	95	33793	159	147	coaD	3	145	WP_023984209.1	2
2005	89.9371	35.664	100	3.03e-26	1	143	91	35664	159	147	coaD	5	151	WP_007174599.1	10
2006	89.3082	39.437	100	3.17e-26	5	142	76	39437	159	140	coaD	3	137	WP_155809658.1	2
2007	91.8239	35.616	99.8	3.71e-26	1	146	93	35616	159	148	coaD	3	146	MBD8998592.1	2
2008	85.5346	38.235	99.8	3.92e-26	2	136	82	38235	159	140	coaD	5	137	WP_094380359.1	4
2009	92.4528	34.694	99.8	5.31e-26	1	147	95	34694	159	149	coaD	3	147	WP_018966572.1	2
2010	91.8239	34.932	99.8	5.9e-26	1	146	94	34932	159	148	coaD	3	150	WP_036871934.1	6
2011	91.8239	34.932	99.4	6.44e-26	1	146	94	34932	159	148	coaD	3	146	WP_019187781.1	2
2012	91.8239	34.247	99.4	7.98e-26	1	146	95	34247	159	148	coaD	3	150	WP_004350333.1	6
2013	94.3396	34	99	1.02e-25	1	150	98	34000	159	152	coaD	3	156	EFC68253.1	8
2014	91.8239	34.247	98.6	1.13e-25	1	146	95	34247	159	148	coaD	3	146	CCY02740.1	2
2015	92.4528	34.694	98.6	1.17e-25	1	147	95	34694	159	149	coaD	3	147	WP_009236965.1	2
2016	92.4528	35.374	99	1.18e-25	2	147	93	35374	159	147	coaD	3	148	WP_091853320.1	2
2017	94.3396	34.667	98.6	1.34e-25	2	150	96	34667	159	151	coaD	3	150	WP_091962020.1	2
2018	92.4528	35.374	98.6	1.67e-25	2	147	93	35374	159	147	coaD	3	148	WP_091817749.1	2
2019	96.2264	33.987	98.2	1.97e-25	1	153	100	33987	159	153	coaD	1	152	MBD8938214.1	1
2020	100	37.736	98.6	2.14e-25	3	159	85	37736	159	148	coaD	3	163	RGN08007.1	6
2021	100	37.736	98.2	2.17e-25	3	159	85	37736	159	148	coaD	3	159	WP_181975344.1	2
2022	100	37.107	98.2	2.59e-25	3	159	86	37107	159	148	coaD	3	159	MBD9272749.1	2
2023	99.3711	36.076	97.4	4.5e-25	3	158	87	36076	159	149	coaD	5	160	HCD65492.1	4
2024	92.4528	34.694	97.1	5.57e-25	1	147	95	34694	159	149	coaD	3	147	OKZ26383.1	2
2025	90.566	38.194	97.8	5.62e-25	1	144	88	38194	159	148	coaD	5	160	CDE56802.1	18
2026	91.8239	34.247	96.7	6.31e-25	2	146	94	34247	159	147	coaD	3	146	WP_107620337.1	2
2027	91.195	35.172	96.7	7.22e-25	1	145	93	35172	159	147	coaD	3	145	HAG32497.1	2
2028	91.195	35.172	96.7	7.22e-25	1	145	93	35172	159	147	coaD	3	145	HAG32497.1	2
2029	91.8239	34.247	97.1	7.38e-25	1	146	95	34247	159	147	coaD	2	151	HCJ47200.1	7
2030	100	37.107	97.1	7.54e-25	3	159	86	37107	159	148	coaD	3	159	RHK10478.1	2
2031	90.566	36.806	97.1	7.74e-25	1	144	90	36806	159	148	coaD	5	150	WP_019968351.1	8
2032	91.195	31.724	96.3	8.4e-25	1	145	98	31724	159	147	coaD	3	145	WP_024991428.1	2
2033	100	37.107	96.7	8.77e-25	3	159	86	37107	159	148	coaD	3	159	MBD8971678.1	2
2034	91.195	31.724	96.3	9.34e-25	1	145	98	31724	159	147	coaD	3	149	ERJ97860.1	6
2035	90.566	36.806	97.1	9.6e-25	1	144	90	36806	159	148	coaD	5	150	WP_008565979.1	8
2036	93.0818	32.432	96.3	9.86e-25	2	148	98	32432	159	149	coaD	3	148	WP_092073585.1	2
2037	99.3711	36.709	96.7	1.02e-24	3	158	86	36709	159	149	coaD	5	160	CDA55777.1	4
2038	93.7107	33.557	96.3	1.02e-24	1	149	98	33557	159	149	coaD	1	148	HAH76417.1	1
2039	91.195	35.172	95.9	1.47e-24	1	145	93	35172	159	147	coaD	3	145	WP_094389222.1	2
2040	93.7107	33.557	95.5	2.06e-24	1	149	98	33557	159	149	coaD	1	148	WP_118355302.1	1
2041	93.7107	33.557	95.5	2.67e-24	1	149	98	33557	159	149	coaD	1	148	CDE32847.1	1
2042	91.195	34.483	95.1	2.82e-24	1	145	94	34483	159	147	coaD	3	145	WP_068856926.1	2
2043	100	36.478	95.5	2.83e-24	3	159	87	36478	159	148	coaD	3	159	QNT67273.1	2
2044	92.4528	36.735	95.1	2.88e-24	1	147	92	36735	159	149	coaD	3	147	WP_036855468.1	2
2045	92.4528	36.735	95.1	3.42e-24	1	147	92	36735	159	149	coaD	3	147	WP_008447386.1	2
2046	100	37.107	95.1	3.43e-24	3	159	86	37107	159	148	coaD	3	159	WP_153090881.1	2
2047	91.195	35.172	94.7	3.73e-24	1	145	93	35172	159	147	coaD	3	145	WP_022311210.1	2
2048	91.8239	32.877	94.7	4.83e-24	2	146	96	32877	159	147	coaD	3	146	WP_092109046.1	2
2049	92.4528	31.293	94.4	4.99e-24	1	147	100	31293	159	149	coaD	3	147	WP_006949791.1	2
2050	92.4528	34.694	94.7	5.13e-24	2	147	94	34694	159	148	coaD	3	147	WP_094389837.1	2
2051	100	35.849	94.7	5.52e-24	3	159	88	35849	159	148	coaD	3	159	WP_181985928.1	2
2052	100	36.478	94.7	5.52e-24	3	159	87	36478	159	148	coaD	3	159	WP_153093612.1	2
2053	92.4528	36.735	95.1	5.69e-24	1	147	92	36735	159	149	coaD	3	166	KXB80414.1	21
2054	100	35.849	94.7	5.73e-24	3	159	88	35849	159	148	coaD	3	163	RGN82586.1	6
2055	93.7107	33.557	94.4	5.75e-24	1	149	98	33557	159	149	coaD	1	148	WP_007898563.1	1
2056	98.1132	34.615	94.7	5.85e-24	2	156	88	34615	159	147	coaD	5	158	HBF05240.1	4
2057	93.0818	34.459	94.4	5.86e-24	2	148	95	34459	159	149	coaD	3	148	WP_091840986.1	2
2058	100.629	35.625	94	9.42e-24	3	160	89	35625	159	149	coaD	3	160	CDC26642.1	2
2059	100	36.478	94	9.7e-24	3	159	87	36478	159	148	coaD	3	159	WP_134842549.1	2
2060	82.3899	38.931	94.4	1.01e-23	1	131	79	38931	159	135	coaD	5	149	HBN47195.1	20
2061	93.0818	35.135	93.6	1.3e-23	2	148	94	35135	159	149	coaD	3	148	WP_091900329.1	2
2062	98.7421	36.306	93.6	1.41e-23	3	157	86	36306	159	148	coaD	5	159	WP_118117881.1	4
2063	94.3396	36	94	1.44e-23	1	150	95	36000	159	151	coaD	2	153	WP_004380529.1	5
2064	93.0818	34.459	93.2	1.6e-23	2	148	95	34459	159	147	coaD	2	150	WP_027454444.1	3
2065	100.629	36.25	93.2	1.92e-23	3	160	88	36250	159	149	coaD	3	160	MBD9073216.1	2
2066	100	36.478	93.2	2.31e-23	3	159	87	36478	159	148	coaD	3	159	WP_181976543.1	2
2067	100	36.478	93.2	2.37e-23	3	159	87	36478	159	148	coaD	3	163	RGL53532.1	6
2068	100	35.849	93.2	2.52e-23	3	159	88	35849	159	148	coaD	3	159	RHK47518.1	2
2069	94.3396	35.333	93.2	2.55e-23	1	150	96	35333	159	151	coaD	2	153	RKW50060.1	5
2070	100.629	35	92.8	3.15e-23	3	160	90	35000	159	149	coaD	3	160	WP_158463829.1	2
2071	93.0818	34.459	92	4.16e-23	2	148	95	34459	159	149	coaD	3	148	WP_073206720.1	2
2072	93.0818	33.784	92.4	4.22e-23	2	148	96	33784	159	147	coaD	2	150	WP_027450758.1	3
2073	93.7107	32.215	92.8	4.3e-23	1	149	100	32215	159	153	coaD	5	157	WP_036892931.1	10
2074	100	35.849	92.4	4.51e-23	3	159	88	35849	159	148	coaD	3	159	WP_089543089.1	2
2075	100	35.849	92.4	4.56e-23	3	159	88	35849	159	148	coaD	3	159	WP_153122200.1	2
2076	100	35.849	92.4	4.61e-23	3	159	88	35849	159	148	coaD	3	159	WP_153083091.1	2
2077	93.7107	34.228	92	4.99e-23	2	149	96	34228	159	150	coaD	3	149	WP_033147413.1	2
2078	100	35.849	92.4	5.04e-23	3	159	88	35849	159	148	coaD	3	163	RGW41782.1	6
2079	100	35.849	92.4	5.26e-23	3	159	88	35849	159	148	coaD	3	163	MQN34266.1	6
2080	100	35.849	92	5.3e-23	3	159	88	35849	159	148	coaD	3	159	WP_153073144.1	2
2081	100	35.22	92	5.35e-23	3	159	89	35220	159	148	coaD	3	159	WP_182384332.1	2
2082	100	35.849	92	5.47e-23	3	159	88	35849	159	148	coaD	3	159	WP_118416948.1	2
2083	100	35.849	92	5.84e-23	3	159	88	35849	159	148	coaD	3	159	MBD9056923.1	2
2084	100	35.849	92	5.9e-23	3	159	88	35849	159	148	coaD	3	159	WP_119248604.1	2
2085	93.7107	32.215	92.4	5.93e-23	1	149	100	32215	159	153	coaD	5	157	WP_116615825.1	10
2086	100	35.22	92	6.31e-23	3	159	89	35220	159	148	coaD	3	163	RHA82926.1	6
2087	100	35.849	92	6.43e-23	3	159	88	35849	159	148	coaD	3	159	WP_144152756.1	2
2088	93.0818	33.108	91.7	7.6e-23	2	148	97	33108	159	149	coaD	3	148	WP_028910978.1	2
2089	89.3082	36.62	92	7.7e-23	1	142	89	36620	159	146	coaD	5	148	WP_028899852.1	8
2090	100	35.849	91.7	8.15e-23	3	159	88	35849	159	148	coaD	3	159	WP_006848932.1	2
2091	100	35.849	91.7	8.17e-23	3	159	88	35849	159	148	coaD	3	163	RGW68764.1	6
2092	100	34.591	91.3	1.19e-22	2	159	90	34591	159	148	coaD	3	159	WP_153080709.1	2
2093	100	35.849	91.3	1.29e-22	3	159	88	35849	159	148	coaD	3	159	WP_118312415.1	2
2094	89.3082	36.62	91.3	1.33e-22	1	142	89	36620	159	146	coaD	5	148	WP_025069958.1	8
2095	93.0818	30.405	90.9	1.34e-22	1	148	102	30405	159	149	coaD	2	152	WP_036879295.1	6
2096	93.7107	33.557	90.5	1.76e-22	2	149	97	33557	159	150	coaD	3	149	WP_028902801.1	2
2097	100	35.22	90.9	1.97e-22	3	159	89	35220	159	148	coaD	3	159	WP_118152518.1	2
2098	100	35.22	90.9	2.2e-22	3	159	89	35220	159	148	coaD	3	163	MQO85313.1	6
2099	100	35.22	90.5	2.24e-22	3	159	89	35220	159	148	coaD	3	159	WP_153142655.1	2
2100	86.7925	36.232	90.1	2.9e-22	2	138	85	36232	159	138	coaD	3	138	CDE07889.1	2
2101	100	35.22	90.1	4e-22	3	159	89	35220	159	148	coaD	3	159	WP_117664192.1	2
2102	68.5535	42.202	89.4	5.59e-22	1	109	62	42202	159	109	coaD	2	113	EFV04247.1	5
2103	68.5535	42.202	89.4	5.63e-22	1	109	62	42202	159	109	coaD	2	112	WP_044078831.1	4
2104	93.0818	33.108	88.2	1.44e-21	2	148	97	33108	159	149	coaD	3	148	WP_074760167.1	2
2105	86.1635	36.496	88.6	1.86e-21	1	137	86	36496	159	141	coaD	5	147	WP_007572834.1	12
2106	74.8428	39.496	87.4	3.62e-21	2	119	70	39496	159	119	coaD	2	121	WP_021826317.1	4
2107	93.0818	32.432	87	3.75e-21	2	148	98	32432	159	149	coaD	3	148	WP_013063844.1	2
2108	68.5535	39.45	86.7	7.17e-21	1	109	65	39450	159	109	coaD	2	112	WP_070667615.1	4
2109	68.5535	39.45	86.3	8.7e-21	1	109	65	39450	159	109	coaD	2	112	WP_070694787.1	4
2110	68.5535	39.45	85.9	1.19e-20	1	109	65	39450	159	109	coaD	2	112	WP_004373440.1	4
2111	68.5535	39.45	85.9	1.34e-20	1	109	65	39450	159	109	coaD	2	112	WP_018919799.1	4
2112	66.0377	39.048	85.9	1.67e-20	0	105	64	39048	159	109	coaD	5	117	WP_039874136.1	13
2113	66.0377	39.048	85.9	1.93e-20	0	105	64	39048	159	109	coaD	5	124	EFI48313.1	20
2114	92.4528	31.973	84.7	3.58e-20	2	147	98	31973	159	148	coaD	3	147	WP_036910709.1	2
2115	92.4528	30.612	77.4	2.27e-17	3	147	98	30612	159	149	coaD	5	148	HCN52832.1	4
2116	71.6981	36.842	73.9	4.15e-16	1	114	71	36842	159	130	coaD	17	114	HCC86708.1	2
2301	100.575	43.048	412	3.21e-138	9	525	254	43048	522	501	cydA	1	508	WP_118116987.1	5
2302	100.575	42.667	411	5.77e-138	8	525	256	42667	522	501	cydA	1	508	WP_117691762.1	5
2303	100.192	43.403	412	5.78e-138	8	523	268	43403	522	501	cydA	1	521	HBF06259.1	5
2304	100.575	42.667	411	6.16e-138	8	525	256	42667	522	501	cydA	1	508	WP_153088176.1	5
2305	100.575	43.048	411	6.64e-138	9	525	254	43048	522	501	cydA	1	508	WP_118415647.1	5
2306	100.575	43.048	411	6.64e-138	9	525	254	43048	522	501	cydA	1	508	WP_118415647.1	5
2307	100.575	42.667	411	7.41e-138	8	525	256	42667	522	501	cydA	1	508	WP_153093345.1	5
2308	100.575	43.048	411	8.9e-138	9	525	254	43048	522	501	cydA	1	508	WP_153112532.1	5
2309	100.575	43.048	410	1.55e-137	9	525	254	43048	522	501	cydA	1	508	WP_118078795.1	5
2310	100.575	43.048	410	1.62e-137	9	525	254	43048	522	501	cydA	1	508	WP_153086483.1	5
2311	100.575	42.667	410	1.62e-137	8	525	256	42667	522	501	cydA	1	508	WP_153097919.1	5
2312	100.575	42.667	410	1.74e-137	8	525	256	42667	522	501	cydA	1	508	WP_153091330.1	5
2313	100.575	42.667	410	1.76e-137	8	525	256	42667	522	501	cydA	1	508	WP_153129691.1	5
2314	100.575	42.476	410	2.07e-137	8	525	257	42476	522	501	cydA	1	508	WP_153072732.1	5
2315	100.575	42.667	410	2.1e-137	8	525	256	42667	522	501	cydA	1	508	WP_118151082.1	5
2316	100.575	42.857	410	2.31e-137	9	525	255	42857	522	501	cydA	1	508	WP_153117948.1	5
2317	100.575	42.476	410	2.72e-137	8	525	257	42476	522	501	cydA	1	508	WP_118255430.1	5
2318	100.575	42.857	409	3.16e-137	9	525	255	42857	522	501	cydA	1	508	QNT67846.1	5
2319	100.575	43.048	409	3.16e-137	9	525	254	43048	522	501	cydA	1	508	WP_089545077.1	5
2320	100.575	42.476	409	3.2e-137	8	525	257	42476	522	501	cydA	1	508	WP_144154136.1	5
2321	100.575	42.476	409	3.2e-137	8	525	257	42476	522	501	cydA	1	508	WP_153104110.1	5
2322	100.575	42.476	409	3.64e-137	8	525	257	42476	522	501	cydA	1	508	WP_118141818.1	5
2323	100.575	42.476	409	3.72e-137	8	525	257	42476	522	501	cydA	1	508	WP_153142579.1	5
2324	101.149	42.235	410	4.59e-137	7	528	259	42235	522	502	cydA	4	522	WP_092112814.1	12
2325	100.575	42.667	409	5.27e-137	8	525	256	42667	522	501	cydA	1	508	WP_154480598.1	5
2326	100.575	43.048	409	5.74e-137	9	525	254	43048	522	501	cydA	1	508	WP_153137600.1	5
2327	100.575	42.667	409	5.99e-137	8	525	256	42667	522	501	cydA	1	509	CDA66352.1	6
2328	100.575	42.667	409	6.33e-137	8	525	256	42667	522	501	cydA	1	508	WP_153122719.1	5
2329	100.575	42.476	409	6.4e-137	8	525	257	42476	522	501	cydA	1	508	WP_153083232.1	5
2330	100.575	42.667	409	6.68e-137	8	525	256	42667	522	501	cydA	1	508	RGX94170.1	5
2331	100.575	42.667	409	6.68e-137	8	525	256	42667	522	501	cydA	1	508	RGX94170.1	5
2332	100.575	43.238	409	6.83e-137	9	525	253	43238	522	501	cydA	1	508	WP_119250331.1	5
2333	100.575	42.857	409	6.9e-137	9	525	255	42857	522	501	cydA	1	508	WP_134844303.1	5
2334	100.575	42.667	408	1.03e-136	8	525	256	42667	522	501	cydA	1	508	WP_117661545.1	5
2335	100.575	42.476	408	1.07e-136	8	525	257	42476	522	501	cydA	1	508	WP_040552975.1	5
2336	100.575	43.048	408	1.1e-136	9	525	254	43048	522	501	cydA	1	508	WP_153085599.1	5
2337	100.575	42.667	408	1.17e-136	8	525	256	42667	522	501	cydA	1	508	WP_117586045.1	5
2338	100.575	42.476	408	1.19e-136	8	525	257	42476	522	501	cydA	1	509	EFB36064.1	6
2339	100.575	42.286	408	1.61e-136	8	525	258	42286	522	501	cydA	1	508	WP_118065352.1	5
2340	100	42.72	407	3.91e-136	7	522	260	42720	522	501	cydA	1	508	WP_117727458.1	5
2341	100.192	42.065	402	2.1e-134	7	523	263	42065	522	500	cydA	1	510	WP_070692735.1	5
2342	100.192	41.874	402	2.47e-134	7	523	264	41874	522	500	cydA	1	510	WP_070666908.1	5
2343	103.257	41.558	402	2.94e-134	6	539	274	41558	522	518	cydA	1	523	WP_036897272.1	5
2344	100.192	41.874	402	3.61e-134	7	523	264	41874	522	500	cydA	1	510	WP_018919526.1	5
2345	100.192	41.874	402	3.61e-134	7	523	264	41874	522	500	cydA	1	509	VEH16145.1	4
2346	100.192	41.874	402	4.38e-134	7	523	264	41874	522	500	cydA	1	510	WP_039873574.1	5
2347	100.192	41.874	402	4.43e-134	7	523	264	41874	522	500	cydA	1	509	EFI49277.1	4
2348	100.192	41.874	402	8.75e-134	7	523	264	41874	522	500	cydA	1	533	EFB33130.1	28
2349	100	42.912	402	9.39e-134	6	522	272	42912	522	502	cydA	2	522	WP_107621009.1	6
2350	99.0421	42.553	399	2.68e-133	4	517	263	42553	522	502	cydA	3	510	WP_100020125.1	11
2351	99.0421	42.553	399	5.14e-133	4	517	263	42553	522	502	cydA	3	510	WP_099977471.1	11
2352	98.8506	42.442	398	7.76e-133	4	516	263	42442	522	501	cydA	3	509	WP_028905227.1	11
2353	99.0421	42.36	398	8.93e-133	4	517	264	42360	522	502	cydA	3	510	WP_100021735.1	11
2354	100.766	42.015	398	1.46e-132	6	526	266	42015	522	505	cydA	1	512	CDD18768.1	5
2355	99.8084	41.651	398	1.47e-132	9	521	263	41651	522	501	cydA	5	516	WP_126679214.1	13
2356	98.8506	42.442	397	2.32e-132	4	516	263	42442	522	501	cydA	3	509	WP_099995965.1	11
2357	99.0421	42.166	397	3.07e-132	4	517	265	42166	522	502	cydA	3	510	WP_088439068.1	11
2358	99.0421	42.36	397	3.31e-132	4	517	264	42360	522	502	cydA	3	510	WP_099984443.1	11
2359	100	41.379	397	4.99e-132	7	522	288	41379	522	508	cydA	1	523	WP_024991698.1	6
2360	99.0421	42.166	396	5.05e-132	4	517	265	42166	522	502	cydA	3	510	WP_061868718.1	11
2361	99.0421	42.36	396	5.75e-132	4	517	264	42360	522	502	cydA	3	510	WP_124140501.1	11
2362	98.8506	42.636	396	6.91e-132	5	516	262	42636	522	501	cydA	3	509	RKW54350.1	11
2363	98.4674	43.58	396	7.14e-132	8	514	271	43580	522	503	cydA	5	522	WP_172343926.1	13
2364	100.766	41.825	396	7.17e-132	6	526	267	41825	522	505	cydA	1	512	MBD9300435.1	5
2365	99.0421	42.36	395	8.4e-132	4	517	264	42360	522	502	cydA	3	510	WP_097648391.1	11
2366	99.0421	42.166	395	9.88e-132	4	517	265	42166	522	502	cydA	3	510	WP_014708558.1	11
2367	98.659	42.913	395	9.94e-132	6	515	258	42913	522	500	cydA	5	510	WP_019967422.1	13
2368	100.383	42.939	395	1.28e-131	7	524	257	42939	522	501	cydA	1	509	WP_036875749.1	5
2369	99.0421	42.166	395	1.4e-131	4	517	265	42166	522	502	cydA	3	510	WP_100328509.1	11
2370	100.383	42.939	395	1.4e-131	7	524	257	42939	522	501	cydA	1	510	WP_004368622.1	6
2371	98.8506	42.636	395	1.57e-131	5	516	262	42636	522	501	cydA	3	509	WP_023925412.1	11
2372	99.0421	42.166	395	1.75e-131	4	517	265	42166	522	502	cydA	3	510	WP_100014824.1	11
2373	100.383	42.939	395	1.91e-131	7	524	257	42939	522	501	cydA	1	510	WP_023984910.1	6
2374	98.659	41.748	395	2.2e-131	7	515	282	41748	522	501	cydA	1	516	WP_021582800.1	6
2375	98.8506	42.442	394	2.53e-131	5	516	263	42442	522	501	cydA	3	509	WP_004362844.1	11
2376	99.0421	42.166	394	2.73e-131	4	517	265	42166	522	502	cydA	3	510	WP_100371575.1	11
2377	98.8506	42.442	394	2.82e-131	5	516	263	42442	522	501	cydA	3	509	WP_004367841.1	11
2378	99.6169	41.154	394	3.36e-131	7	520	264	41154	522	498	cydA	4	513	WP_094464462.1	11
2379	99.0421	42.166	394	3.43e-131	4	517	265	42166	522	502	cydA	3	510	WP_100022753.1	11
2380	99.0421	41.973	394	3.74e-131	4	517	266	41973	522	502	cydA	3	510	WP_097550310.1	11
2381	99.0421	41.973	394	3.78e-131	4	517	266	41973	522	502	cydA	3	510	WP_100016135.1	11
2382	98.8506	42.054	394	5.18e-131	4	516	265	42054	522	501	cydA	3	509	WP_096409355.1	11
2383	99.0421	41.973	394	5.64e-131	4	517	266	41973	522	502	cydA	3	510	WP_045166893.1	11
2384	98.8506	42.054	393	6.71e-131	4	516	265	42054	522	501	cydA	3	509	WP_099892877.1	11
2385	100.192	42.639	393	7.44e-131	9	523	260	42639	522	500	cydA	1	510	WP_025880070.1	5
2386	101.149	42.235	393	8.47e-131	8	528	265	42235	522	505	cydA	1	515	WP_107583013.1	5
2387	98.659	42.913	393	8.85e-131	6	515	258	42913	522	500	cydA	5	510	WP_008565109.1	13
2388	98.8506	42.054	393	9.19e-131	4	516	265	42054	522	501	cydA	3	509	WP_099837016.1	11
2389	99.6169	40.962	393	9.5e-131	7	520	265	40962	522	498	cydA	4	513	WP_094446722.1	11
2390	98.8506	42.442	393	1e-130	5	516	263	42442	522	501	cydA	3	509	WP_088401541.1	11
2391	100.192	42.639	393	1.35e-130	9	523	260	42639	522	500	cydA	1	510	WP_021590729.1	5
2392	99.6169	40.962	393	1.43e-130	7	520	265	40962	522	498	cydA	4	513	WP_094440279.1	11
2393	100.766	40.494	393	1.61e-130	6	526	271	40494	522	503	cydA	1	512	WP_036873558.1	6
2394	100.766	40.494	392	1.63e-130	6	526	271	40494	522	503	cydA	1	511	KGF34273.1	5
2395	97.318	41.929	391	2.38e-130	7	508	248	41929	522	495	cydA	5	489	CDA45383.1	12
2396	100.192	40.727	392	2.94e-130	6	523	270	40727	522	500	cydA	1	510	WP_028900087.1	5
2397	100.192	43.403	392	3.23e-130	9	523	253	43403	522	501	cydA	5	518	WP_007411135.1	13
2398	100	40.996	392	3.37e-130	7	522	281	40996	522	501	cydA	1	520	WP_007173949.1	5
2399	99.0421	42.747	392	3.51e-130	7	517	261	42747	522	501	cydA	3	510	WP_021668702.1	11
2400	100	40.613	392	3.56e-130	6	522	283	40613	522	501	cydA	1	520	WP_036894157.1	5
2401	99.0421	42.166	391	4.18e-130	4	517	265	42166	522	502	cydA	3	510	WP_028896316.1	11
2402	99.0421	42.747	391	4.46e-130	7	517	261	42747	522	501	cydA	3	510	WP_036882641.1	11
2403	100.766	40.494	391	5.25e-130	6	526	271	40494	522	503	cydA	1	511	ERT61418.1	5
2404	100.766	40.494	391	5.6e-130	6	526	271	40494	522	503	cydA	1	512	WP_036890832.1	6
2405	99.6169	40.769	391	5.6e-130	7	520	266	40769	522	498	cydA	4	513	WP_094389757.1	11
2406	99.6169	40.769	391	5.79e-130	7	520	266	40769	522	498	cydA	4	513	WP_094436660.1	11
2407	100	40.613	392	5.85e-130	6	522	283	40613	522	501	cydA	1	520	WP_116617491.1	5
2408	99.0421	42.747	390	7.82e-130	7	517	261	42747	522	501	cydA	3	510	WP_004357686.1	11
2409	100.192	41.874	391	8.68e-130	7	523	266	41874	522	502	cydA	1	509	CDA94488.1	4
2410	100.766	40.684	390	1.18e-129	6	526	270	40684	522	503	cydA	1	512	PMC24991.1	6
2411	97.1264	42.801	390	1.29e-129	7	507	277	42801	522	501	cydA	5	516	WP_006948230.1	13
2412	100.766	40.684	390	1.29e-129	6	526	270	40684	522	503	cydA	1	511	WP_180970785.1	5
2413	100.766	40.684	390	1.69e-129	6	526	270	40684	522	503	cydA	1	512	WP_040563460.1	6
2414	100.766	40.684	390	2.05e-129	6	526	270	40684	522	503	cydA	1	511	EFA90849.1	5
2415	100.192	43.212	390	2.12e-129	9	523	254	43212	522	501	cydA	5	518	WP_004340235.1	13
2416	100	39.464	389	4.28e-129	4	522	282	39464	522	509	cydA	5	518	WP_036893693.1	14
2417	99.0421	43.327	389	4.87e-129	6	517	259	43327	522	501	cydA	2	509	WP_077196489.1	10
2418	100	39.464	389	5.09e-129	4	522	282	39464	522	509	cydA	5	517	WP_025073072.1	13
2419	100.192	41.3	388	8.88e-129	6	523	267	41300	522	500	cydA	1	510	WP_025070489.1	5
2420	100.192	41.3	388	1.01e-128	6	523	267	41300	522	500	cydA	1	510	WP_004381472.1	5
2421	98.8506	42.054	388	1.32e-128	6	516	280	42054	522	503	cydA	5	526	WP_172178716.1	13
2422	99.0421	42.94	387	1.35e-128	6	517	261	42940	522	502	cydA	3	510	WP_006045979.1	11
2423	100.192	43.212	387	2.31e-128	9	523	254	43212	522	501	cydA	5	518	WP_004345573.1	13
2424	99.0421	42.747	387	2.44e-128	7	517	260	42747	522	500	cydA	3	509	WP_028909811.1	10
2425	100	39.272	387	2.78e-128	4	522	283	39272	522	509	cydA	5	518	PMC10161.1	14
2426	101.533	39.623	387	2.82e-128	6	530	271	39623	522	502	cydA	5	525	WP_172275467.1	13
2427	100	39.272	387	3.31e-128	4	522	283	39272	522	509	cydA	5	517	WP_180979174.1	13
2428	100	39.272	387	3.49e-128	4	522	283	39272	522	509	cydA	5	517	WP_180961598.1	13
2429	100	39.272	387	3.68e-128	4	522	283	39272	522	509	cydA	5	518	PNP95148.1	14
2430	100.192	41.491	386	4.31e-128	6	523	266	41491	522	500	cydA	1	510	WP_007134247.1	5
2431	100	39.08	386	5.15e-128	4	522	284	39080	522	509	cydA	5	517	EFA97396.1	13
2432	100	39.08	386	5.26e-128	4	522	284	39080	522	509	cydA	5	518	WP_039868426.1	14
2433	100.958	41.366	386	8.35e-128	8	527	265	41366	522	500	cydA	1	515	WP_094400844.1	6
2434	102.682	40.672	386	1.23e-127	10	536	266	40672	522	501	cydA	1	523	MBB1529425.1	5
2435	98.659	42.33	384	2.01e-127	5	515	263	42330	522	502	cydA	5	510	WP_155715723.1	13
2436	99.2337	42.085	385	2.26e-127	6	518	281	42085	522	501	cydA	1	520	WP_005847419.1	5
2437	98.8506	42.829	384	2.64e-127	6	516	261	42829	522	501	cydA	3	509	WP_115084209.1	11
2438	98.659	42.33	384	2.73e-127	5	515	263	42330	522	502	cydA	5	510	WP_009435917.1	13
2439	100	39.08	384	3.38e-127	4	522	284	39080	522	509	cydA	5	518	WP_036926166.1	14
2440	100	39.08	384	3.69e-127	4	522	284	39080	522	509	cydA	5	517	KGI22806.1	13
2441	98.2759	41.326	384	4.59e-127	7	513	267	41326	522	501	cydA	5	507	WP_036853802.1	13
2442	98.659	40.971	384	4.86e-127	7	515	286	40971	522	501	cydA	1	516	WP_025066657.1	6
2443	101.724	40.678	384	4.99e-127	7	531	264	40678	522	501	cydA	5	526	WP_094381910.1	13
2444	102.682	40.672	384	5.42e-127	10	536	266	40672	522	501	cydA	1	523	MBB1539565.1	5
2445	100.575	40	384	6.53e-127	8	525	270	40000	522	501	cydA	5	520	WP_172181306.1	13
2446	98.2759	41.326	382	9.58e-127	7	513	267	41326	522	501	cydA	5	507	WP_008447074.1	13
2447	100.958	42.315	383	9.87e-127	7	527	260	42315	522	501	cydA	2	516	RKW63151.1	7
2448	100.958	42.315	383	1.02e-126	7	527	260	42315	522	501	cydA	2	516	WP_009236237.1	7
2449	100	41.571	383	1.2e-126	10	522	262	41571	522	501	cydA	5	516	WP_125235434.1	13
2450	98.4674	42.996	382	1.91e-126	7	514	275	42996	522	501	cydA	2	516	WP_018967807.1	7
2451	104.215	41.728	382	3.64e-126	10	544	260	41728	522	519	cydA	4	525	WP_007897191.1	11
2452	98.8506	40.891	381	3.73e-126	6	516	267	40891	522	501	cydA	5	509	WP_036866210.1	13
2453	98.8506	40.891	381	4.44e-126	6	516	267	40891	522	501	cydA	5	509	WP_004336516.1	13
2454	98.659	42.136	381	5.28e-126	5	515	264	42136	522	502	cydA	5	510	WP_004382223.1	13
2455	99.6169	41.923	381	6.7e-126	7	520	260	41923	522	498	cydA	4	513	MBD9035692.1	11
2456	103.64	41.22	380	1.42e-125	8	541	267	41220	522	519	cydA	4	525	CDE35045.1	11
2457	100.958	39.469	380	1.8e-125	8	527	275	39469	522	500	cydA	1	514	MBD9229664.1	5
2458	100.958	41.935	380	1.83e-125	7	527	262	41935	522	501	cydA	2	516	WP_025797543.1	7
2459	100	41.571	380	1.85e-125	8	522	259	41571	522	498	cydA	4	513	MBD9027290.1	11
2460	99.0421	42.166	379	1.87e-125	6	517	259	42166	522	501	cydA	5	509	WP_120174022.1	13
2461	103.64	41.22	380	2.6e-125	8	541	267	41220	522	519	cydA	4	525	MBD8937245.1	11
2462	98.4674	41.829	379	2.65e-125	6	514	286	41829	522	505	cydA	2	518	WP_036877533.1	8
2463	99.0421	42.36	379	2.7e-125	6	517	258	42360	522	501	cydA	5	509	WP_089366399.1	13
2464	99.0421	42.36	379	2.79e-125	6	517	258	42360	522	501	cydA	5	509	WP_009011131.1	13
2465	103.64	41.22	379	3.56e-125	8	541	267	41220	522	519	cydA	4	525	WP_118354660.1	11
2466	103.64	41.22	379	4.05e-125	8	541	267	41220	522	519	cydA	4	525	HAH76917.1	11
2467	100.958	41.746	379	5.5e-125	7	527	263	41746	522	501	cydA	2	516	WP_009163016.1	7
2468	98.659	43.495	378	8.8e-125	11	515	271	43495	522	503	cydA	3	515	WP_029904538.1	7
2469	99.0421	41.973	377	9.67e-125	6	517	260	41973	522	501	cydA	5	509	WP_013264766.1	13
2470	99.0421	41.973	377	1.17e-124	6	517	260	41973	522	501	cydA	5	509	WP_004361156.1	13
2471	99.0421	42.166	377	1.37e-124	6	517	259	42166	522	501	cydA	5	509	WP_036862888.1	13
2472	92.9119	44.742	377	1.4e-124	9	485	230	44742	522	468	cydA	3	476	WP_028901973.1	11
2473	98.659	41.942	377	1.64e-124	5	515	265	41942	522	502	cydA	5	510	WP_007368416.1	13
2474	99.0421	41.973	377	1.79e-124	8	517	272	41973	522	495	cydA	1	515	WP_007575832.1	5
2475	100.958	39.279	377	2.33e-124	8	527	276	39279	522	500	cydA	1	515	CCZ11090.1	6
2476	102.682	39.925	377	2.59e-124	9	536	270	39925	522	501	cydA	1	523	MBA7488464.1	5
2477	99.8084	40.307	376	4.93e-124	5	521	270	40307	522	501	cydA	5	516	OKZ25739.1	13
2478	98.659	41.359	375	8.13e-124	5	515	268	41359	522	502	cydA	5	510	WP_018910071.1	13
2479	101.916	40.789	375	8.87e-124	7	532	255	40789	522	503	cydA	2	511	CCY15974.1	10
2480	99.0421	41.586	375	1.11e-123	6	517	262	41586	522	501	cydA	5	509	WP_025839342.1	13
2481	98.8506	39.922	375	1.17e-123	7	516	268	39922	522	493	cydA	3	508	WP_106813255.1	10
2482	97.8927	40.705	375	1.48e-123	5	511	290	40705	522	501	cydA	1	512	HCN54421.1	5
2483	99.8084	41.267	374	1.49e-123	7	521	260	41267	522	502	cydA	5	510	WP_021673090.1	13
2484	98.4674	40.661	374	2.35e-123	4	514	271	40661	522	501	cydA	5	509	WP_006952799.1	13
2485	100.958	42.315	374	3.27e-123	7	527	260	42315	522	501	cydA	2	516	WP_110369959.1	7
2486	100.575	40.952	374	3.87e-123	8	525	273	40952	522	502	cydA	5	527	WP_094382304.1	13
2487	99.2337	40.927	374	4.39e-123	7	518	285	40927	522	501	cydA	1	519	WP_018361343.1	6
2488	100	40.23	373	7.36e-123	7	522	267	40230	522	495	cydA	1	507	CCX43658.1	4
2489	99.0421	40.039	373	1.21e-122	6	517	293	40039	522	502	cydA	1	521	WP_044066100.1	7
2490	99.0421	42.166	372	1.75e-122	8	517	259	42166	522	501	cydA	5	509	WP_008823050.1	13
2491	97.318	40.157	371	1.99e-122	8	508	257	40157	522	495	cydA	5	489	CDE87808.1	12
2492	99.0421	40.039	372	2.71e-122	6	517	293	40039	522	502	cydA	1	521	WP_044072889.1	7
2493	103.448	40.37	372	3.09e-122	7	540	292	40370	522	519	cydA	1	536	WP_091820763.1	6
2494	99.8084	40.499	371	3.65e-122	8	521	265	40499	522	498	cydA	4	512	WP_094387405.1	11
2495	99.8084	40.499	371	4.2e-122	8	521	265	40499	522	498	cydA	4	512	WP_094388660.1	11
2496	100.383	41.603	371	4.86e-122	9	524	272	41603	522	501	cydA	1	517	CCY03596.1	5
2497	99.0421	40.039	371	5.27e-122	6	517	293	40039	522	502	cydA	1	517	CDD05436.1	3
2498	99.8084	40.691	370	5.8e-122	9	521	264	40691	522	498	cydA	4	512	CDC99413.1	11
2499	100.958	40.228	370	9.24e-122	5	527	258	40228	522	501	cydA	3	509	WP_091838713.1	12
2500	99.0421	40.039	370	9.76e-122	6	517	293	40039	522	502	cydA	1	517	WP_044074887.1	3
2501	99.2337	41.506	370	1.11e-121	6	518	263	41506	522	502	cydA	5	510	WP_004353369.1	13
2502	98.4674	41.051	370	1.22e-121	5	514	269	41051	522	501	cydA	5	509	WP_025078505.1	13
2503	99.0421	42.166	370	1.24e-121	8	517	259	42166	522	501	cydA	5	509	WP_036870843.1	13
2504	99.0421	42.166	369	1.32e-121	8	517	259	42166	522	501	cydA	5	509	WP_025790815.1	13
2505	99.2337	40.347	370	1.53e-121	7	518	288	40347	522	501	cydA	1	519	WP_009227655.1	6
2506	99.2337	39.961	370	1.66e-121	8	518	265	39961	522	493	cydA	3	508	MBD9200669.1	10
2507	101.149	42.424	369	1.92e-121	9	528	258	42424	522	501	cydA	2	516	WP_019186807.1	7
2508	98.8506	39.341	369	1.97e-121	5	516	277	39341	522	501	cydA	5	510	WP_024990248.1	12
2509	99.2337	41.506	369	2.29e-121	6	518	263	41506	522	502	cydA	5	510	WP_025067411.1	13
2510	101.149	42.424	369	2.33e-121	9	528	258	42424	522	501	cydA	2	516	WP_070723778.1	7
2511	100.383	40.458	368	3.15e-121	9	524	264	40458	522	504	cydA	1	496	WP_044067575.1	1
2512	99.8084	39.731	369	3.3e-121	7	521	269	39731	522	498	cydA	4	512	WP_094423369.1	11
2513	99.2337	41.506	368	3.72e-121	6	518	263	41506	522	502	cydA	5	510	WP_118865627.1	13
2514	99.8084	39.731	369	3.8e-121	7	521	269	39731	522	498	cydA	4	512	WP_094466488.1	11
2515	99.2337	41.506	368	4.42e-121	6	518	263	41506	522	502	cydA	5	510	WP_013671200.1	13
2516	104.981	39.234	368	5.64e-121	9	548	264	39234	522	517	cydA	4	519	WP_094880662.1	7
2517	91.7625	42.589	366	6.57e-121	8	479	229	42589	522	464	cydA	3	457	WP_104404082.1	8
2518	99.0421	39.652	368	7.06e-121	6	517	295	39652	522	502	cydA	1	521	WP_044079469.1	7
2519	99.2337	39.768	368	8.37e-121	8	518	266	39768	522	493	cydA	3	508	MBD9042469.1	10
2520	101.149	42.045	367	9.58e-121	9	528	260	42045	522	501	cydA	2	516	WP_009230324.1	7
2521	102.107	39.4	368	1.22e-120	6	533	270	39400	522	501	cydA	5	528	CCZ15520.1	13
2522	100.766	41.445	367	1.92e-120	7	526	261	41445	522	501	cydA	5	520	CCX67601.1	13
2523	105.747	39.855	366	4.24e-120	12	552	262	39855	522	512	cydA	1	526	HCJ46299.1	5
2524	100	40.038	365	4.84e-120	6	522	260	40038	522	502	cydA	5	506	WP_033148574.1	14
2525	99.2337	39.575	365	6.65e-120	8	518	267	39575	522	493	cydA	3	508	HAE07172.1	10
2526	100	39.847	365	8.96e-120	6	522	261	39847	522	502	cydA	5	506	WP_028903282.1	14
2527	100.192	39.962	364	1.46e-119	7	523	261	39962	522	503	cydA	5	506	WP_027454628.1	13
2528	101.916	40.602	364	3.88e-119	10	532	264	40602	522	501	cydA	5	527	CCY84419.1	13
2529	100	40.996	363	5.36e-119	8	522	276	40996	522	501	cydA	5	527	WP_053397494.1	13
2530	100.575	41.524	362	6.36e-119	10	525	251	41524	522	502	cydA	5	509	WP_028913314.1	14
2531	100.383	39.885	362	8.51e-119	8	524	259	39885	522	501	cydA	5	508	WP_013065568.1	14
2532	100.383	40.84	363	1e-118	7	524	274	40840	522	501	cydA	5	527	WP_125103861.1	13
2533	100.575	40	362	1.32e-118	8	525	259	40000	522	502	cydA	5	509	WP_074760415.1	14
2534	100.383	41.031	362	1.41e-118	7	524	273	41031	522	501	cydA	5	527	CCX69227.1	13
2535	101.149	38.826	362	1.99e-118	7	528	275	38826	522	498	cydA	1	513	CDE40525.1	4
2536	102.49	39.439	362	2.01e-118	7	535	269	39439	522	500	cydA	4	529	WP_091901629.1	12
2537	100.192	39.962	360	4.72e-118	6	523	261	39962	522	503	cydA	5	506	WP_027449187.1	13
2538	103.831	39.114	360	7.23e-118	9	542	257	39114	522	502	cydA	5	525	WP_091957499.1	13
2539	102.299	40.449	359	1.13e-117	10	534	255	40449	522	501	cydA	1	509	WP_103915808.1	6
2540	100.575	39.619	359	1.16e-117	8	525	261	39619	522	502	cydA	5	509	WP_073043120.1	14
2541	103.831	39.114	360	1.21e-117	9	542	257	39114	522	502	cydA	5	526	SDZ93824.1	14
2542	100.575	39.619	359	1.5e-117	8	525	261	39619	522	502	cydA	5	509	WP_028908330.1	14
2543	102.299	40.262	359	1.57e-117	10	534	256	40262	522	501	cydA	1	509	WP_091768686.1	6
2544	102.299	40.262	358	2.99e-117	10	534	256	40262	522	501	cydA	1	509	WP_036909504.1	6
2545	96.3602	41.352	358	3.17e-117	6	503	279	41352	522	493	cydA	3	508	HBN46484.1	10
2546	99.2337	38.996	357	6.57e-117	6	518	278	38996	522	502	cydA	4	510	WP_130829811.1	12
2547	99.2337	41.12	355	3.37e-116	7	518	260	41120	522	502	cydA	2	493	CDF21828.1	4
2548	102.874	38.92	355	1.02e-115	10	537	260	38920	522	502	cydA	5	521	WP_073208769.1	14
2549	104.406	38.532	353	8.7e-115	9	545	256	38532	522	502	cydA	5	525	WP_092068874.1	13
2550	103.831	38.561	352	2.07e-114	8	542	259	38561	522	501	cydA	5	525	WP_091816065.1	13
2551	103.831	38.192	347	7.18e-113	8	542	261	38192	522	501	cydA	5	525	WP_091851648.1	13
2552	67.8161	48.588	320	6.17e-104	6	354	162	48588	522	338	cydA	5	366	WP_048798823.1	13
2553	55.364	52.595	307	2.64e-100	2	289	128	52595	522	280	cydA	1	293	MQN34602.1	5
2554	90.4215	40.678	309	7.36e-99	8	472	238	40678	522	501	cydA	54	456	RKW57776.1	3
2555	87.1648	33.187	243	2.44e-73	6	455	260	33187	522	495	cydA	67	437	CDE09706.1	1
2556	58.2375	32.895	140	1.87e-36	8	304	163	32895	522	502	cydA	219	284	MBD8971803.1	2
2557	53.2567	29.137	104	9.03e-24	7	278	156	29137	522	502	cydA	249	266	CCY64881.1	6
2558	23.9464	40	85.9	3e-18	0	125	75	40000	522	502	cydA	378	157	WP_048798922.1	33
2559	36.0153	32.979	82	1.24e-16	3	188	109	32979	522	502	cydA	315	190	RKW49273.1	20
2560	15.7088	40.244	69.3	2.22e-13	0	82	49	40244	522	501	cydA	420	82	MQN34108.1	1
2561	14.751	40.26	65.1	5.2e-12	0	77	46	40260	522	501	cydA	425	77	MQO97955.1	1
2563	97.6253	28.378	117	1.96e-28	13	370	225	28378	379	377	cydB	31	353	WP_104403748.1	1
2564	102.375	28.093	111	4.44e-26	11	388	247	28093	379	373	cydB	4	376	WP_172275466.1	3
2565	102.902	26.667	106	1.99e-24	10	390	254	26667	379	373	cydB	2	376	WP_007575831.1	1
2566	108.707	25.485	106	3.6e-24	9	412	253	25485	379	377	cydB	1	393	WP_044110339.1	1
2567	108.707	25.243	105	5.02e-24	9	412	254	25243	379	377	cydB	1	393	WP_044109011.1	1
2568	104.222	26.329	104	1.08e-23	13	395	251	26329	379	376	cydB	4	379	CCX67600.1	3
2569	105.277	25.313	102	5.33e-23	11	399	254	25313	379	379	cydB	4	380	WP_025883770.1	3
2570	104.485	28.283	102	7.6e-23	13	396	247	28283	379	373	cydB	2	383	QNT66474.1	1
2571	105.013	27.387	102	9e-23	12	398	241	27387	379	373	cydB	2	376	WP_125103862.1	1
2572	103.694	25.7	99.8	5.87e-22	14	393	252	25700	379	374	cydB	4	377	WP_172178718.1	3
2573	101.055	25.849	98.2	1.72e-21	12	383	248	25849	379	365	cydB	2	366	MBD9027291.1	1
2574	105.013	27.387	98.2	2.21e-21	12	398	241	27387	379	373	cydB	2	376	WP_053397495.1	1
2575	100.792	25.131	97.8	2.31e-21	11	382	252	25131	379	365	cydB	2	366	MBD9035691.1	1
2576	104.749	25.441	97.8	2.44e-21	10	397	248	25441	379	373	cydB	2	374	WP_118200080.1	1
2577	105.277	26.065	97.4	3.14e-21	12	399	245	26065	379	373	cydB	2	376	CCY84417.1	1
2578	105.277	27.318	97.4	3.26e-21	13	399	238	27318	379	373	cydB	2	374	WP_153086398.1	1
2579	104.485	27.525	97.4	3.74e-21	12	396	239	27525	379	373	cydB	4	376	CCX69226.1	3
2580	105.013	25.126	97.1	4.68e-21	13	398	248	25126	379	374	cydB	4	377	WP_126679215.1	3
2581	102.111	26.098	97.1	5.61e-21	9	387	258	26098	379	373	cydB	2	374	WP_089545050.1	1
2582	102.111	27.132	96.7	5.89e-21	10	387	254	27132	379	373	cydB	2	374	WP_006847199.1	1
2583	105.277	27.318	96.7	7.36e-21	13	399	238	27318	379	373	cydB	2	374	WP_117691652.1	1
2584	105.013	26.382	96.7	7.65e-21	12	398	243	26382	379	373	cydB	2	374	WP_118255413.1	1
2585	105.541	26	96.3	8.37e-21	13	400	253	26000	379	377	cydB	2	381	WP_073208771.1	1
2586	105.013	26.382	96.3	8.76e-21	12	398	243	26382	379	373	cydB	2	374	WP_153088126.1	1
2587	104.749	26.196	96.3	9.01e-21	11	397	245	26196	379	373	cydB	2	374	HBI99245.1	1
2588	102.375	27.062	96.3	1.02e-20	11	388	253	27062	379	373	cydB	2	374	WP_118415588.1	1
2589	102.375	27.32	95.9	1.22e-20	11	388	252	27320	379	373	cydB	2	374	WP_153137565.1	1
2590	101.847	26.943	95.9	1.25e-20	11	386	252	26943	379	373	cydB	4	374	WP_153093332.1	3
2591	102.111	27.132	95.9	1.35e-20	10	387	254	27132	379	373	cydB	2	374	WP_153112510.1	1
2592	105.277	27.068	95.5	1.61e-20	13	399	239	27068	379	373	cydB	2	374	WP_153083227.1	1
2593	102.375	26.804	95.5	1.67e-20	11	388	254	26804	379	373	cydB	2	374	WP_118151032.1	1
2594	104.485	26.515	95.5	1.79e-20	12	396	241	26515	379	373	cydB	4	374	RGX94154.1	3
2595	101.847	27.202	95.5	1.81e-20	11	386	251	27202	379	373	cydB	4	374	WP_117586007.1	3
2596	102.375	27.062	95.5	1.84e-20	11	388	253	27062	379	373	cydB	2	374	WP_153085597.1	1
2597	102.375	27.062	95.1	2.13e-20	11	388	253	27062	379	373	cydB	2	374	RGS46444.1	1
2598	102.375	27.062	95.1	2.23e-20	11	388	253	27062	379	373	cydB	2	374	WP_118116946.1	1
2599	102.375	27.062	95.1	2.32e-20	11	388	253	27062	379	373	cydB	2	374	WP_118141816.1	1
2600	104.485	25.505	95.1	2.41e-20	10	396	254	25505	379	377	cydB	2	375	WP_024990247.1	1
2601	105.277	27.318	95.1	2.63e-20	13	399	238	27318	379	373	cydB	2	374	WP_153117893.1	1
2602	102.375	27.062	94.7	3.13e-20	11	388	253	27062	379	373	cydB	2	374	WP_118065317.1	1
2603	103.694	25.191	94.7	3.48e-20	12	393	254	25191	379	374	cydB	4	377	WP_021590706.1	3
2604	105.013	26.382	94	5.01e-20	12	398	243	26382	379	373	cydB	2	374	WP_144154108.1	1
2605	105.013	26.382	94	5.41e-20	12	398	243	26382	379	373	cydB	2	374	RHK13147.1	1
2606	105.277	27.569	94	6.19e-20	13	399	238	27569	379	373	cydB	2	375	WP_117727423.1	1
2607	103.694	24.682	93.6	7.73e-20	9	393	264	24682	379	376	cydB	2	379	WP_029904539.1	1
2608	102.375	26.804	93.6	8.84e-20	11	388	254	26804	379	373	cydB	2	374	WP_118189820.1	1
2609	103.166	25.064	93.2	1.22e-19	11	391	256	25064	379	374	cydB	2	372	WP_036894158.1	1
2610	105.013	26.382	92.8	1.65e-19	12	398	243	26382	379	373	cydB	2	374	WP_118078714.1	1
2611	103.166	24.552	92	3.1e-19	9	391	267	24552	379	379	cydB	4	380	WP_172343927.1	3
2612	105.013	26.131	91.7	3.51e-19	11	398	244	26131	379	373	cydB	2	374	WP_119250324.1	1
2613	100.792	26.44	91.3	3.89e-19	12	382	237	26440	379	362	cydB	2	359	CDD05437.1	1
2614	103.43	23.469	90.9	6.41e-19	9	392	264	23469	379	373	cydB	2	376	WP_094400842.1	1
2615	101.055	24.804	90.9	7.25e-19	9	383	270	24804	379	373	cydB	2	376	MBD9229663.1	1
2616	102.902	25.385	90.9	7.61e-19	12	390	258	25385	379	377	cydB	4	375	HCN54422.1	3
2617	105.277	27.569	90.5	9.07e-19	13	399	246	27569	379	373	cydB	2	383	WP_153097902.1	1
2618	100.792	26.178	90.1	1.05e-18	12	382	238	26178	379	362	cydB	2	359	WP_044074886.1	1
2619	103.694	25.7	90.1	1.41e-18	11	393	251	25700	379	374	cydB	2	372	MBB1529424.1	1
2620	103.694	25.7	89.7	1.48e-18	11	393	251	25700	379	374	cydB	2	372	MBB1539564.1	1
2621	104.749	26.196	89.7	1.6e-18	14	397	243	26196	379	371	cydB	2	374	WP_025797545.1	1
2622	102.639	26.735	89.7	1.63e-18	8	389	261	26735	379	379	cydB	4	380	WP_068857000.1	3
2623	104.749	26.196	89.7	1.76e-18	12	397	244	26196	379	374	cydB	2	372	WP_044123324.1	1
2624	100.792	26.44	89.4	1.82e-18	12	382	237	26440	379	362	cydB	2	359	WP_044079431.1	1
2625	105.013	27.889	89.4	1.99e-18	13	398	236	27889	379	374	cydB	4	376	MBD9300436.1	3
2626	100.792	26.178	89.4	2.2e-18	12	382	238	26178	379	362	cydB	2	359	WP_044072878.1	1
2627	103.166	25.064	89.4	2.25e-18	10	391	259	25064	379	373	cydB	2	376	WP_107621008.1	1
2628	100.528	25.459	89	2.93e-18	10	381	252	25459	379	365	cydB	2	366	WP_106813256.1	1
2629	103.166	24.808	89	3.36e-18	12	391	260	24808	379	373	cydB	2	376	WP_036897274.1	1
2630	100.792	25.916	88.2	4.64e-18	12	382	239	25916	379	362	cydB	2	359	WP_044066094.1	1
2631	103.43	23.98	88.2	5.2e-18	11	392	264	23980	379	374	cydB	2	377	CDA94486.1	1
2632	104.222	26.582	88.2	6.58e-18	12	395	247	26582	379	374	cydB	4	378	WP_091838715.1	3
2633	103.43	25.765	87.8	7.52e-18	7	392	261	25765	379	379	cydB	4	380	CCZ15521.1	3
2634	106.332	24.814	87.8	8.59e-18	12	403	242	24814	379	374	cydB	2	372	WP_116617492.1	1
2635	105.013	26.131	87.4	1.05e-17	11	398	243	26131	379	373	cydB	2	373	MBD8971802.1	1
2636	100.792	26.178	87	1.13e-17	12	382	238	26178	379	362	cydB	2	359	WP_042519530.1	1
2637	106.069	25.871	87.4	1.2e-17	14	402	256	25871	379	377	cydB	1	385	CDE87807.1	1
2638	102.902	22.564	87	1.33e-17	8	390	263	22564	379	374	cydB	4	372	WP_036877535.1	3
2639	103.43	25.51	87	1.6e-17	7	392	262	25510	379	379	cydB	4	380	OKZ25747.1	3
2640	104.485	24.242	86.7	2.09e-17	11	396	253	24242	379	374	cydB	2	372	MBA7488465.1	1
2641	102.639	24.165	85.5	5.26e-17	9	389	264	24165	379	374	cydB	4	378	CCY03597.1	3
2642	105.541	25	85.1	5.68e-17	12	400	251	25000	379	377	cydB	4	379	WP_004367840.1	3
2643	103.694	26.209	85.1	7.25e-17	14	393	250	26209	379	374	cydB	2	373	WP_091901526.1	1
2644	97.8892	25.067	84.7	8.85e-17	11	371	235	25067	379	374	cydB	28	377	WP_004371384.1	26
2645	105.541	25	84.7	9.36e-17	12	400	251	25000	379	377	cydB	4	379	WP_004362843.1	3
2646	105.013	25.879	84.7	9.54e-17	15	398	249	25879	379	374	cydB	2	377	WP_008565110.1	1
2647	104.222	26.582	84.3	1.38e-16	12	395	250	26582	379	374	cydB	2	377	WP_004381471.1	1
2648	103.166	26.854	84	1.62e-16	12	391	249	26854	379	373	cydB	2	373	WP_117661477.1	1
2649	104.749	24.937	83.6	2.24e-16	13	397	258	24937	379	379	cydB	4	380	WP_107583011.1	3
2650	100.528	24.672	83.6	2.27e-16	10	381	255	24672	379	365	cydB	2	366	WP_094880661.1	1
2651	99.2084	25.532	83.6	2.27e-16	14	376	241	25532	379	362	cydB	7	361	CCX43659.1	5
2652	97.0976	24.728	83.6	2.28e-16	9	368	240	24728	379	374	cydB	28	377	WP_018919525.1	26
2653	100.264	25.789	83.2	2.47e-16	12	380	248	25789	379	365	cydB	4	366	WP_094423393.1	3
2654	104.222	25.063	83.6	2.53e-16	13	395	258	25063	379	377	cydB	4	380	WP_028909810.1	3
2655	97.0976	24.728	83.2	2.78e-16	9	368	240	24728	379	374	cydB	28	377	WP_004377319.1	26
2656	104.749	25.693	83.2	3.06e-16	15	397	249	25693	379	373	cydB	2	376	WP_019967423.1	1
2657	103.958	25.381	83.2	3.08e-16	13	394	257	25381	379	377	cydB	4	379	WP_004357629.1	3
2658	103.958	25.381	83.2	3.14e-16	13	394	257	25381	379	377	cydB	4	379	WP_117653192.1	3
2659	100.264	24.737	82.4	4.79e-16	11	380	251	24737	379	362	cydB	2	364	WP_009227654.1	1
2660	100.792	24.869	82.4	4.81e-16	9	382	254	24869	379	365	cydB	2	367	HBN46483.1	1
2661	99.4723	25.199	82	7.03e-16	8	377	272	25199	379	373	cydB	4	376	WP_092112815.1	3
2662	103.958	24.112	82	7.07e-16	10	394	262	24112	379	377	cydB	6	384	CDE09707.1	6
2663	100.264	25.526	82	7.5e-16	12	380	249	25526	379	365	cydB	4	366	WP_094388667.1	3
2664	108.707	24.757	81.6	1.07e-15	17	412	241	24757	379	377	cydB	1	378	CDE40524.1	1
2665	100.264	24.737	81.3	1.27e-15	11	380	251	24737	379	362	cydB	2	364	WP_018361342.1	1
2666	104.222	26.329	81.3	1.35e-15	12	395	251	26329	379	374	cydB	2	377	WP_025070488.1	1
2667	104.749	24.685	81.3	1.4e-15	13	397	256	24685	379	377	cydB	4	379	WP_130829810.1	3
2668	39.8417	31.126	81.3	1.48e-15	1	151	103	31126	379	151	cydB	1	150	ERT61385.1	1
2669	39.8417	31.126	80.9	1.57e-15	1	151	103	31126	379	151	cydB	1	150	EFA90848.1	1
2670	104.749	23.174	80.9	1.61e-15	13	397	255	23174	379	373	cydB	4	376	WP_103003252.1	3
2671	107.652	24.51	80.9	1.63e-15	15	408	243	24510	379	377	cydB	4	379	WP_028896317.1	3
2672	98.6807	24.866	80.9	1.67e-15	11	374	239	24866	379	377	cydB	28	381	WP_033148575.1	26
2673	99.7361	24.603	80.9	1.74e-15	7	378	273	24603	379	373	cydB	4	376	CCZ11089.1	3
2674	104.749	26.448	80.9	1.95e-15	12	397	248	26448	379	374	cydB	2	377	RKW50333.1	1
2675	100.528	26.247	80.5	2.12e-15	13	381	245	26247	379	365	cydB	4	366	WP_094387426.1	3
2676	103.694	24.173	80.5	2.14e-15	12	393	258	24173	379	374	cydB	4	377	WP_125235435.1	3
2677	98.6807	26.471	80.5	2.22e-15	12	374	231	26471	379	354	cydB	4	365	KXA43217.1	13
2678	98.6807	26.471	80.5	2.26e-15	12	374	231	26471	379	354	cydB	4	355	WP_060940170.1	3
2679	100.264	24.474	80.1	2.58e-15	9	380	257	24474	379	365	cydB	2	366	WP_094440280.1	1
2680	104.749	23.929	80.5	2.59e-15	11	397	254	23929	379	371	cydB	1	402	KDR51873.1	28
2681	104.485	23.99	80.5	2.69e-15	11	396	255	23990	379	371	cydB	1	402	WP_009236238.1	28
2682	97.8892	25.606	80.1	3.02e-15	11	371	228	25606	379	374	cydB	28	356	EFA43683.1	10
2683	98.6807	26.471	80.1	3.02e-15	12	374	231	26471	379	354	cydB	4	355	WP_025874890.1	3
2684	104.485	23.99	80.1	3.19e-15	11	396	253	23990	379	371	cydB	2	374	WP_026292538.1	1
2685	98.153	24.462	80.1	3.38e-15	10	372	243	24462	379	377	cydB	28	381	WP_028903283.1	26
2686	101.055	25.326	80.1	3.4e-15	12	383	252	25326	379	365	cydB	1	368	CDC99412.1	2
2687	104.222	24.051	79.7	4.18e-15	11	395	254	24051	379	371	cydB	2	374	RKW63153.1	1
2688	105.541	26	79.7	4.29e-15	15	400	240	26000	379	371	cydB	2	374	WP_009163015.1	1
2689	43.7995	31.928	79.3	5.06e-15	2	166	105	31928	379	167	cydB	2	158	WP_153091316.1	1
2690	43.7995	31.928	79.3	5.2e-15	2	166	105	31928	379	167	cydB	2	158	WP_153129671.1	1
2691	106.596	25	79	7.64e-15	15	404	246	25000	379	377	cydB	4	379	WP_096409358.1	3
2692	106.596	25	79	8.38e-15	15	404	246	25000	379	377	cydB	4	379	WP_097550311.1	3
2693	100.264	24.211	78.6	8.77e-15	9	380	258	24211	379	365	cydB	2	366	WP_094436662.1	1
2694	102.639	25.707	78.6	9.97e-15	11	389	252	25707	379	371	cydB	4	375	WP_094381909.1	3
2695	43.7995	31.325	78.6	1.14e-14	2	166	106	31325	379	167	cydB	2	158	WP_153122601.1	1
2696	96.0422	25.824	78.6	1.22e-14	10	364	241	25824	379	374	cydB	28	377	WP_004368623.1	26
2697	100.264	24.211	78.2	1.23e-14	9	380	258	24211	379	365	cydB	2	366	WP_094446723.1	1
2698	39.0501	31.081	78.2	1.25e-14	1	148	101	31081	379	151	cydB	4	149	WP_036873663.1	3
2699	43.7995	31.325	78.2	1.28e-14	2	166	106	31325	379	167	cydB	2	158	WP_134844290.1	1
2700	39.8417	30.464	78.2	1.29e-14	1	151	104	30464	379	151	cydB	1	150	EFA97395.1	1
2701	43.7995	31.325	78.2	1.45e-14	2	166	106	31325	379	167	cydB	2	158	WP_153072713.1	1
2702	105.013	25.628	78.2	1.55e-14	12	398	231	25628	379	365	cydB	2	367	WP_172181304.1	1
2703	39.0501	30.405	77.8	1.83e-14	1	148	102	30405	379	151	cydB	4	149	WP_036890849.1	3
2704	39.0501	30.405	77.8	1.86e-14	1	148	102	30405	379	151	cydB	4	149	WP_040563462.1	3
2705	39.0501	30.405	77.4	2.26e-14	1	148	102	30405	379	151	cydB	4	149	WP_102696887.1	3
2706	96.0422	25.549	77.4	2.35e-14	10	364	242	25549	379	374	cydB	28	377	WP_023984911.1	26
2707	106.596	24.752	77.4	2.41e-14	15	404	247	24752	379	377	cydB	4	379	WP_099892875.1	3
2708	105.277	24.311	77.4	2.53e-14	12	399	257	24311	379	377	cydB	4	381	WP_091858851.1	3
2709	107.388	24.816	77.4	2.62e-14	16	407	243	24816	379	377	cydB	4	379	WP_024998626.1	3
2710	43.7995	31.325	77	3.15e-14	2	166	106	31325	379	167	cydB	2	158	MQO97956.1	1
2711	104.749	23.678	77	3.27e-14	11	397	263	23678	379	379	cydB	4	380	WP_006948229.1	3
2712	100.264	24.211	77	3.54e-14	9	380	258	24211	379	365	cydB	2	366	WP_094389758.1	1
2713	39.0501	30.405	76.3	5.81e-14	1	148	102	30405	379	151	cydB	4	149	WP_036926186.1	3
2714	107.388	25.061	76.3	5.81e-14	16	407	242	25061	379	377	cydB	4	379	WP_045166894.1	3
2715	39.0501	30.405	76.3	6.14e-14	1	148	102	30405	379	151	cydB	4	149	WP_025073073.1	3
2716	43.7995	28.916	75.9	9.56e-14	2	166	110	28916	379	167	cydB	2	158	WP_025815263.1	1
2717	107.388	24.816	75.5	1.05e-13	16	407	243	24816	379	377	cydB	4	379	WP_061868717.1	3
2718	107.388	24.816	75.5	1.05e-13	16	407	243	24816	379	377	cydB	4	379	WP_061868717.1	3
2719	107.388	24.816	75.5	1.15e-13	16	407	243	24816	379	377	cydB	4	379	WP_112200387.1	3
2720	97.3615	25.745	75.5	1.26e-13	11	369	235	25745	379	374	cydB	28	377	WP_028900088.1	26
2721	107.916	25.183	75.5	1.3e-13	17	409	239	25183	379	377	cydB	4	379	WP_100371574.1	3
2722	106.86	25.185	75.1	1.31e-13	17	405	244	25185	379	377	cydB	4	379	WP_100021734.1	3
2723	107.388	24.816	75.1	1.33e-13	16	407	243	24816	379	377	cydB	4	379	WP_099995966.1	3
2724	107.388	24.816	75.1	1.34e-13	16	407	243	24816	379	377	cydB	4	379	WP_100014823.1	3
2725	39.0501	29.73	75.1	1.36e-13	1	148	103	29730	379	151	cydB	4	149	WP_039868440.1	3
2726	102.111	23.256	75.1	1.37e-13	8	387	267	23256	379	373	cydB	4	376	WP_115154128.1	3
2727	107.388	24.816	75.1	1.43e-13	16	407	243	24816	379	377	cydB	4	379	WP_099977470.1	3
2728	107.388	24.57	75.1	1.57e-13	16	407	244	24570	379	377	cydB	4	379	WP_099984444.1	3
2729	107.388	24.816	75.1	1.62e-13	16	407	243	24816	379	377	cydB	4	379	WP_100190329.1	3
2730	100	25.858	74.7	1.65e-13	10	379	248	25858	379	365	cydB	4	365	HAH76916.1	3
2731	107.388	25.061	75.1	1.69e-13	16	407	242	25061	379	377	cydB	4	379	WP_124140500.1	3
2732	100	25.594	74.7	1.91e-13	10	379	249	25594	379	365	cydB	4	365	WP_118354659.1	3
2733	39.5778	31.333	74.7	1.93e-13	2	150	98	31333	379	151	cydB	4	149	WP_027444768.1	3
2734	39.5778	30	74.7	2.11e-13	2	150	100	30000	379	151	cydB	4	149	WP_077196488.1	3
2735	106.596	25.248	74.3	2.54e-13	16	404	245	25248	379	377	cydB	4	379	WP_025078506.1	3
2736	107.388	24.816	74.3	2.61e-13	16	407	243	24816	379	377	cydB	4	379	WP_014708559.1	3
2737	100	25.858	73.9	3.03e-13	10	379	248	25858	379	365	cydB	4	365	WP_007897186.1	3
2738	107.388	24.57	74.3	3.08e-13	16	407	244	24570	379	377	cydB	4	379	WP_028905226.1	3
2739	100	25.858	73.9	3.15e-13	10	379	248	25858	379	365	cydB	4	365	MBD8937246.1	3
2740	101.319	22.656	73.9	3.53e-13	6	384	270	22656	379	370	cydB	2	372	WP_021582878.1	1
2741	101.847	22.539	73.9	4.06e-13	7	386	271	22539	379	372	cydB	2	373	WP_024991699.1	1
2742	99.7361	25.132	73.6	4.07e-13	8	378	252	25132	379	365	cydB	4	365	CDE35044.1	3
2743	104.749	24.181	73.6	4.7e-13	15	397	258	24181	379	377	cydB	4	379	WP_013264086.1	3
2744	103.694	24.173	73.2	6.3e-13	13	393	253	24173	379	374	cydB	4	372	WP_091820761.1	3
2745	39.5778	29.333	72.8	7.93e-13	1	150	105	29333	379	151	cydB	2	149	WP_009230325.1	1
2746	39.5778	29.333	72.8	8e-13	1	150	105	29333	379	151	cydB	2	149	WP_070723779.1	1
2747	39.5778	29.333	72.8	8.07e-13	1	150	105	29333	379	151	cydB	2	149	RKW57775.1	1
2748	39.0501	29.73	72.8	8.3e-13	1	148	103	29730	379	151	cydB	4	149	WP_006045980.1	3
2749	39.5778	30	70.1	8.58e-13	1	150	104	30000	379	151	cydB	2	149	HBF06260.1	1
2750	39.5778	29.333	72.8	9.35e-13	1	150	105	29333	379	151	cydB	2	149	WP_019186806.1	1
2751	39.5778	29.333	72.8	9.35e-13	1	150	105	29333	379	151	cydB	2	149	WP_019186806.1	1
2752	39.0501	29.73	72.4	1.03e-12	1	148	103	29730	379	151	cydB	4	149	RKW49272.1	3
2753	39.0501	29.73	72.4	1.03e-12	1	148	103	29730	379	151	cydB	4	149	WP_115084210.1	3
2754	39.5778	30	72.4	1.09e-12	1	150	104	30000	379	151	cydB	2	149	HCJ46300.1	1
2755	96.8338	23.161	72	1.39e-12	9	367	240	23161	379	374	cydB	30	374	WP_092068871.1	28
2756	39.0501	29.054	72	1.76e-12	1	148	104	29054	379	151	cydB	4	149	WP_099837017.1	3
2757	103.166	24.041	71.6	1.98e-12	11	391	259	24041	379	373	cydB	4	376	WP_007411151.1	3
2758	39.0501	29.054	71.6	2.13e-12	1	148	104	29054	379	151	cydB	4	149	WP_100022754.1	3
2759	39.0501	29.054	71.6	2.27e-12	1	148	104	29054	379	151	cydB	4	149	WP_097648390.1	3
2760	104.749	23.929	70.5	5.22e-12	15	397	259	23929	379	377	cydB	4	379	WP_036862885.1	3
2761	102.375	24.227	69.3	1.31e-11	9	388	258	24227	379	377	cydB	11	381	WP_036909505.1	9
2762	104.749	24.685	69.3	1.37e-11	15	397	256	24685	379	377	cydB	4	379	WP_004382222.1	3
2763	104.749	24.685	68.9	1.54e-11	12	397	245	24685	379	374	cydB	4	371	WP_025003103.1	3
2764	32.7177	29.839	68.9	1.8e-11	0	124	87	29839	379	151	cydB	28	149	WP_021824575.1	26
2765	39.5778	28	68.6	1.94e-11	1	150	107	28000	379	151	cydB	2	149	WP_005847421.1	1
2766	32.7177	29.839	68.6	1.98e-11	0	124	87	29839	379	151	cydB	28	149	WP_007134246.1	26
2767	28.2322	35.514	68.6	2.07e-11	1	107	68	35514	379	110	cydB	4	108	WP_094382305.1	3
2768	109.235	23.43	68.6	2.26e-11	15	414	248	23430	379	377	cydB	4	387	WP_091816062.1	3
2769	39.5778	28	68.6	2.53e-11	1	150	107	28000	379	151	cydB	2	149	WP_027952836.1	1
2770	105.541	23.75	68.2	2.97e-11	14	400	256	23750	379	377	cydB	4	379	WP_036922970.1	3
2771	104.749	23.174	67.4	4.6e-11	15	397	262	23174	379	377	cydB	4	379	WP_107625933.1	3
2772	104.749	23.174	67.4	4.6e-11	15	397	262	23174	379	377	cydB	4	379	WP_107625933.1	3
2773	102.111	24.806	66.6	9.03e-11	13	387	247	24806	379	365	cydB	2	366	HAE07171.1	1
2774	28.2322	35.514	66.2	1.12e-10	1	107	68	35514	379	110	cydB	4	108	WP_025066658.1	3
2775	102.111	24.806	66.2	1.31e-10	13	387	247	24806	379	365	cydB	2	366	HAM29588.1	1
2776	57.7836	25.571	66.2	1.34e-10	4	219	146	25571	379	208	cydB	4	218	WP_033150045.1	3
2777	102.111	25.065	65.5	1.9e-10	13	387	246	25065	379	365	cydB	2	366	MBD9042470.1	1
2778	39.0501	28.378	65.5	2.09e-10	1	148	105	28378	379	151	cydB	4	151	EFU30224.1	5
2779	39.0501	28.378	65.5	2.21e-10	1	148	105	28378	379	151	cydB	4	149	WP_044126316.1	3
2780	27.9683	33.019	65.5	2.33e-10	1	106	70	33019	379	109	cydB	4	107	WP_008446993.1	3
2781	105.277	23.559	65.1	2.71e-10	12	399	262	23559	379	379	cydB	4	381	WP_091957304.1	3
2782	60.4222	25.328	65.1	3.26e-10	4	229	154	25328	379	215	cydB	2	227	WP_028913315.1	1
2783	37.9947	27.778	65.1	3.38e-10	1	144	103	27778	379	147	cydB	4	145	WP_013065060.1	3
2784	105.541	23.25	64.7	3.63e-10	16	400	258	23250	379	377	cydB	4	379	WP_009011130.1	3
2785	105.541	23.25	64.7	3.98e-10	16	400	258	23250	379	377	cydB	4	379	WP_089366398.1	3
2786	39.0501	28.378	63.9	5.17e-10	1	148	105	28378	379	151	cydB	4	149	WP_155815015.1	3
2787	27.9683	32.075	63.9	7.42e-10	1	106	71	32075	379	109	cydB	4	107	WP_036853804.1	3
2788	27.9683	31.132	63.5	8.35e-10	1	106	72	31132	379	109	cydB	4	107	WP_025790816.1	3
2789	27.9683	31.132	63.5	9.22e-10	1	106	72	31132	379	109	cydB	4	107	WP_036870841.1	3
2790	104.749	23.426	63.5	9.56e-10	14	397	261	23426	379	377	cydB	4	379	WP_009435798.1	3
2828	75.4579	32.039	107	1.93e-26	4	206	130	32039	273	270	dapB	74	251	WP_107625120.1	47
2829	75.4579	31.553	105	7.84e-26	4	206	131	31553	273	270	dapB	74	251	WP_089365352.1	47
2830	75.4579	31.553	105	9.07e-26	4	206	131	31553	273	270	dapB	74	251	WP_009011049.1	47
2831	75.8242	35.266	102	1.03e-24	7	207	123	35266	273	270	dapB	74	252	WP_007411437.1	47
2832	75.8242	34.783	100	4.51e-24	7	207	124	34783	273	270	dapB	74	252	WP_004341348.1	47
2833	98.9011	27.037	99.4	1.62e-23	9	270	164	27037	273	271	dapB	6	241	WP_006952892.1	1
2834	76.1905	30.769	94.7	8.51e-22	5	208	130	30769	273	270	dapB	74	251	WP_024991368.1	47
2835	74.359	31.034	94.4	9.37e-22	6	203	123	31034	273	270	dapB	74	238	WP_029906920.1	47
2836	79.8535	30.275	94.4	9.97e-22	6	218	135	30275	273	270	dapB	60	237	WP_027449372.1	30
2837	75.4579	32.039	94.4	1.17e-21	5	206	130	32039	273	270	dapB	74	251	WP_091820428.1	47
2838	100.366	28.467	94	1.45e-21	8	274	164	28467	273	270	dapB	6	251	WP_060941366.1	1
2839	74.7253	30.882	94	1.61e-21	4	204	131	30882	273	268	dapB	74	249	WP_007367650.1	47
2840	74.7253	30.882	94	1.84e-21	4	204	131	30882	273	268	dapB	74	249	WP_013670798.1	47
2841	74.7253	30.882	93.6	1.96e-21	4	204	131	30882	273	268	dapB	74	249	WP_118866284.1	47
2842	76.9231	30.952	93.6	2.2e-21	5	210	127	30952	273	270	dapB	74	251	WP_100019287.1	47
2843	75.4579	30.583	93.6	2.54e-21	5	206	133	30583	273	270	dapB	74	251	WP_039877151.1	47
2844	79.8535	32.11	93.2	3.14e-21	7	218	128	32110	273	268	dapB	70	251	WP_094388855.1	35
2845	79.8535	32.11	93.2	3.14e-21	7	218	128	32110	273	268	dapB	70	251	WP_022309849.1	35
2846	100.366	28.467	93.2	3.38e-21	8	274	164	28467	273	270	dapB	6	251	WP_025874769.1	1
2847	100.733	27.273	93.2	3.6e-21	9	275	166	27273	273	270	dapB	6	251	WP_018463608.1	1
2848	76.9231	30.952	93.2	3.6e-21	5	210	127	30952	273	270	dapB	74	251	WP_028905604.1	47
2849	75.4579	30.583	93.6	3.68e-21	5	206	133	30583	273	270	dapB	74	268	ERJ97806.1	64
2850	76.1905	35.096	92.8	3.79e-21	9	208	121	35096	273	270	dapB	74	251	WP_172174699.1	47
2851	76.9231	30.952	92.8	3.79e-21	5	210	127	30952	273	270	dapB	74	251	WP_100328076.1	47
2852	76.9231	30.952	92.8	4.38e-21	5	210	127	30952	273	270	dapB	74	251	WP_100023315.1	47
2853	77.2894	32.701	92.8	4.56e-21	8	211	122	32701	273	270	dapB	74	251	WP_025065382.1	47
2854	76.1905	29.327	92.8	4.61e-21	5	208	133	29327	273	270	dapB	74	251	WP_025817258.1	47
2855	75.4579	30.097	92.8	4.66e-21	4	206	134	30097	273	270	dapB	74	251	WP_025077707.1	47
2856	76.9231	30.952	92.8	5.11e-21	5	210	127	30952	273	270	dapB	74	251	WP_045166625.1	47
2857	75.8242	31.401	92.4	5.59e-21	6	207	131	31401	273	270	dapB	74	252	CDA93468.1	47
2858	75.4579	32.039	92.4	5.9e-21	7	206	130	32039	273	270	dapB	74	251	CDA45791.1	47
2859	76.9231	30.952	92.4	6.02e-21	5	210	127	30952	273	270	dapB	74	251	WP_100356144.1	47
2860	76.9231	30.952	92.4	6.08e-21	5	210	127	30952	273	270	dapB	74	251	WP_099995348.1	47
2861	102.93	27.758	92.4	6.21e-21	9	281	157	27758	273	270	dapB	6	251	MBB1550202.1	1
2862	76.9231	30.952	92.4	6.21e-21	5	210	127	30952	273	270	dapB	74	251	WP_099976985.1	47
2863	76.9231	30.952	92.4	6.88e-21	5	210	127	30952	273	270	dapB	74	251	WP_024999438.1	47
2864	76.9231	30.952	92.4	6.88e-21	5	210	127	30952	273	270	dapB	74	251	WP_088438447.1	47
2865	76.9231	30.476	92.4	6.95e-21	5	210	128	30476	273	270	dapB	74	251	WP_100370892.1	47
2866	76.9231	30	92	7.47e-21	5	210	129	30000	273	270	dapB	74	251	WP_019187600.1	47
2867	76.9231	30.952	92	7.71e-21	5	210	127	30952	273	270	dapB	74	251	WP_099890221.1	47
2868	75.4579	29.612	92	7.87e-21	4	206	135	29612	273	270	dapB	74	251	RKW53450.1	47
2869	74.7253	30.392	92	8.11e-21	4	204	132	30392	273	268	dapB	74	249	WP_036853389.1	47
2870	74.7253	30.392	92	9.37e-21	4	204	132	30392	273	268	dapB	74	249	WP_004354085.1	47
2871	74.7253	30.392	92	9.46e-21	4	204	132	30392	273	268	dapB	74	249	WP_025067091.1	47
2872	100.733	28.364	92	9.66e-21	9	275	163	28364	273	270	dapB	6	251	WP_028897221.1	1
2873	75.4579	30.583	91.7	1.02e-20	5	206	133	30583	273	270	dapB	74	251	WP_092108925.1	47
2874	103.297	28.369	91.7	1.09e-20	9	282	154	28369	273	270	dapB	6	251	WP_025829953.1	1
2875	76.9231	30.476	91.7	1.1e-20	5	210	128	30476	273	270	dapB	74	251	WP_099835518.1	47
2876	76.9231	30.952	91.7	1.25e-20	5	210	127	30952	273	270	dapB	74	251	WP_100013729.1	47
2877	75.4579	29.126	91.7	1.33e-20	4	206	136	29126	273	270	dapB	74	251	WP_013264574.1	47
2878	79.8535	31.651	91.7	1.38e-20	7	218	129	31651	273	268	dapB	70	251	WP_094387352.1	35
2879	75.4579	29.126	91.7	1.4e-20	4	206	136	29126	273	270	dapB	74	251	WP_004358868.1	47
2880	100.366	26.642	91.3	1.49e-20	7	274	169	26642	273	270	dapB	6	251	WP_023924914.1	1
2881	75.4579	29.612	91.3	1.53e-20	4	206	135	29612	273	270	dapB	74	251	WP_004363669.1	47
2882	81.3187	31.081	91.3	1.68e-20	7	222	127	31081	273	270	dapB	70	251	HAH77842.1	35
2883	75.4579	32.039	91.3	1.86e-20	5	206	130	32039	273	270	dapB	74	251	WP_018362146.1	47
2884	75.4579	32.039	90.9	2.07e-20	5	206	126	32039	273	268	dapB	74	249	WP_062432259.1	47
2885	76.1905	32.212	90.9	2.23e-20	6	208	129	32212	273	270	dapB	74	253	WP_158463586.1	47
2886	76.9231	29.524	90.9	2.34e-20	5	210	130	29524	273	270	dapB	74	251	WP_018966674.1	47
2887	103.297	28.014	90.9	2.36e-20	9	282	155	28014	273	270	dapB	6	251	WP_008564810.1	1
2888	76.1905	32.212	90.9	2.37e-20	6	208	129	32212	273	270	dapB	74	253	CDC26094.1	47
2889	76.1905	32.212	90.9	2.6e-20	6	208	129	32212	273	270	dapB	74	253	WP_118200240.1	47
2890	101.832	27.698	90.5	2.81e-20	8	278	161	27698	273	270	dapB	6	251	WP_024999838.1	1
2891	76.9231	30.476	90.5	3.18e-20	5	210	128	30476	273	270	dapB	74	251	WP_124140563.1	47
2892	76.9231	29.048	90.5	3.24e-20	5	210	131	29048	273	270	dapB	74	251	WP_070720026.1	47
2893	81.3187	31.081	90.5	3.52e-20	7	222	127	31081	273	270	dapB	70	251	WP_118355580.1	35
2894	76.1905	32.212	90.5	3.65e-20	6	208	129	32212	273	270	dapB	74	253	HCD66031.1	47
2895	75.4579	29.126	90.5	3.71e-20	4	206	136	29126	273	270	dapB	74	251	WP_018910854.1	47
2896	76.1905	31.731	90.5	3.73e-20	6	208	130	31731	273	270	dapB	74	253	MBD9300675.1	47
2897	81.3187	31.081	90.1	3.86e-20	7	222	127	31081	273	270	dapB	70	251	CDE32556.1	35
2898	68.8645	33.511	90.1	3.97e-20	5	188	115	33511	273	251	dapB	74	234	WP_021590753.1	47
2899	76.9231	29.524	90.1	4.79e-20	5	210	130	29524	273	270	dapB	74	251	WP_009237103.1	47
2900	75.4579	29.612	90.1	5.2e-20	4	206	135	29612	273	270	dapB	74	251	WP_088400604.1	47
2901	76.9231	29.048	89.7	5.47e-20	5	210	131	29048	273	270	dapB	74	251	WP_009231611.1	47
2902	75.4579	32.039	89.7	5.78e-20	6	206	128	32039	273	268	dapB	74	243	MBD9015386.1	39
2903	76.1905	32.212	89.7	6.03e-20	6	208	129	32212	273	270	dapB	74	253	WP_006848940.1	47
2904	100.366	28.832	89.7	6.12e-20	9	274	163	28832	273	270	dapB	6	251	WP_025002459.1	1
2905	81.3187	31.081	89.7	6.19e-20	7	222	127	31081	273	270	dapB	70	251	WP_007899691.1	35
2906	75.4579	32.524	89.7	6.28e-20	6	206	127	32524	273	268	dapB	74	251	WP_022111309.1	47
2907	102.93	27.046	89.7	6.31e-20	9	281	159	27046	273	270	dapB	6	251	MBB1538514.1	1
2908	75.4579	32.524	89.7	6.35e-20	6	206	127	32524	273	268	dapB	74	251	WP_119248609.1	47
2909	76.9231	30.476	89.4	6.55e-20	5	210	128	30476	273	270	dapB	74	238	BAR94991.1	34
2910	98.5348	27.509	89.4	6.89e-20	9	269	160	27509	273	270	dapB	6	238	WP_092070237.1	1
2911	80.5861	31.364	89.7	6.92e-20	7	220	125	31364	273	268	dapB	70	249	WP_028910433.1	35
2912	75.4579	31.068	89.7	6.92e-20	6	206	132	31068	273	270	dapB	74	251	WP_025071914.1	47
2913	76.9231	30	89.7	6.92e-20	5	210	129	30000	273	270	dapB	74	251	WP_036855408.1	47
2914	75.4579	29.126	89.7	6.92e-20	4	206	136	29126	273	270	dapB	74	251	WP_004383028.1	47
2915	76.9231	30.476	89.4	7.36e-20	5	210	128	30476	273	270	dapB	74	251	WP_014709126.1	47
2916	75.4579	31.553	89.4	7.77e-20	5	206	127	31553	273	268	dapB	74	249	WP_036898843.1	47
2917	75.4579	28.641	89.4	7.91e-20	4	206	137	28641	273	270	dapB	74	251	WP_021672490.1	47
2918	75.4579	29.126	89.4	8.16e-20	4	206	136	29126	273	270	dapB	74	251	WP_025838900.1	47
2919	76.1905	32.212	89.4	8.54e-20	6	208	129	32212	273	270	dapB	74	253	WP_153122204.1	47
2920	75.4579	28.641	89.4	9.22e-20	4	206	137	28641	273	270	dapB	74	251	WP_036862650.1	47
2921	76.5568	31.1	89	1.01e-19	7	209	128	31100	273	270	dapB	74	251	HCN52817.1	47
2922	76.9231	30	89	1.03e-19	5	210	129	30000	273	270	dapB	74	251	WP_100021370.1	47
2923	76.9231	30.476	89	1.06e-19	5	210	128	30476	273	270	dapB	74	251	WP_004336451.1	47
2924	75.4579	28.641	89	1.08e-19	4	206	137	28641	273	270	dapB	74	251	WP_009435539.1	47
2925	101.099	28.986	89	1.08e-19	9	276	160	28986	273	270	dapB	6	251	CCX66330.1	1
2926	75.4579	31.068	89	1.09e-19	6	206	132	31068	273	270	dapB	74	251	WP_036925508.1	47
2927	101.099	28.623	89	1.11e-19	9	276	161	28623	273	270	dapB	6	251	WP_172204291.1	1
2928	76.9231	30	89	1.14e-19	5	210	129	30000	273	270	dapB	74	251	WP_100189670.1	47
2929	76.9231	30	89	1.17e-19	5	210	129	30000	273	270	dapB	74	251	WP_096405725.1	47
2930	76.1905	30.288	88.6	1.4e-19	5	208	127	30288	273	268	dapB	74	249	WP_008447286.1	47
2931	75.4579	32.039	89	1.42e-19	6	206	128	32039	273	268	dapB	74	251	MBD9272743.1	47
2932	76.1905	31.731	89	1.44e-19	6	208	130	31731	273	270	dapB	74	253	MBD9259939.1	47
2933	76.9231	29.524	88.6	1.45e-19	5	210	130	29524	273	270	dapB	74	251	WP_019036028.1	47
2934	75.4579	32.039	88.6	1.5e-19	6	206	128	32039	273	268	dapB	74	251	WP_089543091.1	47
2935	75.4579	31.068	88.6	1.57e-19	5	206	132	31068	273	270	dapB	74	251	WP_009228185.1	47
2936	101.099	28.261	88.6	1.6e-19	10	276	162	28261	273	270	dapB	6	251	WP_053397850.1	1
2937	78.3883	31.776	88.6	1.7e-19	7	214	120	31776	273	268	dapB	74	253	WP_125235090.1	47
2938	76.5568	30.144	88.6	1.78e-19	5	209	129	30144	273	270	dapB	74	250	WP_117653472.1	47
2939	73.6264	30.846	88.2	1.95e-19	5	201	125	30846	273	270	dapB	74	237	AGH14117.1	47
2940	79.4872	29.954	88.2	1.97e-19	6	217	120	29954	273	270	dapB	74	251	WP_007572826.1	47
2941	78.3883	29.907	88.6	2.03e-19	6	214	128	29907	273	270	dapB	74	255	WP_126678744.1	47
2942	75.8242	30.435	88.2	2.07e-19	6	207	132	30435	273	270	dapB	74	251	WP_028899868.1	47
2943	101.099	28.623	88.2	2.09e-19	10	276	161	28623	273	270	dapB	6	251	WP_021856024.1	1
2944	103.663	27.562	88.2	2.24e-19	10	283	155	27562	273	270	dapB	6	251	WP_021826398.1	1
2945	75.4579	29.126	88.2	2.31e-19	4	206	136	29126	273	270	dapB	74	251	WP_120173482.1	47
2946	75.4579	30.583	88.2	2.44e-19	6	206	133	30583	273	270	dapB	74	251	WP_008123669.1	47
2947	76.5568	30.144	88.2	2.49e-19	5	209	129	30144	273	270	dapB	74	250	WP_025064577.1	47
2948	103.663	27.562	88.2	2.51e-19	10	283	155	27562	273	270	dapB	6	251	WP_007134890.1	1
2949	102.198	27.24	87.8	3.02e-19	10	279	157	27240	273	268	dapB	6	249	WP_024990171.1	1
2950	102.93	27.046	87.8	3.02e-19	9	281	159	27046	273	270	dapB	6	251	MBB1530573.1	1
2951	76.5568	30.144	88.2	3.34e-19	5	209	129	30144	273	270	dapB	74	271	ERJ75313.1	68
2952	76.5568	30.144	88.2	3.36e-19	5	209	129	30144	273	270	dapB	74	274	SUB84403.1	71
2953	68.8645	30.319	87	3.78e-19	4	188	114	30319	273	248	dapB	74	230	RKW55069.1	47
2954	75.4579	30.583	87.4	3.82e-19	6	206	133	30583	273	270	dapB	74	251	WP_103002482.1	47
2955	77.2894	32.227	87.4	3.88e-19	7	211	123	32227	273	270	dapB	74	251	RKW58655.1	47
2956	102.564	28.571	87.4	3.94e-19	12	280	157	28571	273	270	dapB	1	247	SEA45536.1	1
2957	77.6557	29.245	87.4	3.98e-19	7	212	128	29245	273	270	dapB	74	251	WP_007174589.1	47
2958	77.2894	32.227	87.4	4.01e-19	7	211	123	32227	273	270	dapB	74	251	WP_025796653.1	47
2959	75.8242	30.435	87.4	4.02e-19	6	207	132	30435	273	270	dapB	74	251	WP_025069700.1	47
2960	100.366	27.737	87.4	4.02e-19	10	274	153	27737	273	270	dapB	6	238	WP_091840954.1	1
2961	99.2674	28.413	87	4.5e-19	11	271	155	28413	273	270	dapB	6	238	WP_091960497.1	1
2962	75.4579	30.583	87.4	5.08e-19	6	206	133	30583	273	270	dapB	74	251	CDE85989.1	47
2963	78.7546	29.767	87	5.29e-19	6	215	123	29767	273	270	dapB	74	251	WP_004377887.1	47
2964	74.7253	30.882	86.7	5.41e-19	6	204	118	30882	273	268	dapB	74	223	SEM79217.1	34
2965	75.4579	31.068	87	5.59e-19	6	206	130	31068	273	268	dapB	74	251	WP_117664189.1	47
2966	78.022	30.047	87	5.74e-19	6	213	121	30047	273	268	dapB	74	249	WP_070694870.1	47
2967	75.8242	30.435	87	6.23e-19	6	207	132	30435	273	270	dapB	74	251	WP_004380561.1	47
2968	78.022	30.047	87	6.29e-19	6	213	121	30047	273	268	dapB	74	249	WP_070667626.1	47
2969	75.8242	30.918	86.7	6.71e-19	6	207	118	30918	273	270	dapB	74	238	WP_028902822.1	47
2970	101.832	27.338	87	6.83e-19	9	278	162	27338	273	270	dapB	6	251	WP_172181577.1	1
2971	78.7546	29.767	87	7.04e-19	6	215	123	29767	273	270	dapB	74	251	WP_004373220.1	47
2972	102.564	28.929	87	7.12e-19	10	280	157	28929	273	268	dapB	3	262	EKX98347.1	11
2973	73.9927	29.703	86.7	7.21e-19	5	202	127	29703	273	270	dapB	74	238	WP_094391547.1	47
2974	78.022	28.638	86.7	7.8e-19	5	213	128	28638	273	270	dapB	74	251	WP_025791355.1	47
2975	82.7839	30.088	86.7	7.88e-19	9	226	124	30088	273	270	dapB	70	251	WP_004369221.1	35
2976	78.022	28.638	86.7	7.88e-19	5	213	128	28638	273	270	dapB	74	251	WP_008823517.1	47
2977	98.5348	27.881	86.3	8.32e-19	10	269	159	27881	273	270	dapB	6	238	WP_074760184.1	1
2978	76.9231	28.571	86.7	8.46e-19	5	210	132	28571	273	270	dapB	74	251	WP_040556304.1	47
2979	78.022	30.047	86.7	8.63e-19	6	213	121	30047	273	268	dapB	74	249	WP_018919714.1	47
2980	76.5568	32.536	86.3	1.02e-18	7	209	121	32536	273	268	dapB	74	249	WP_044064246.1	47
2981	75.4579	30.097	86.3	1.13e-18	5	206	130	30097	273	268	dapB	74	249	WP_068856943.1	47
2982	76.9231	28.571	86.7	1.13e-18	5	210	132	28571	273	270	dapB	74	272	EFL44844.1	68
2983	79.8535	30.734	86.3	1.21e-18	6	218	129	30734	273	268	dapB	70	249	CDB04848.1	35
2984	98.5348	27.881	85.9	1.43e-18	10	269	159	27881	273	270	dapB	6	238	WP_073044572.1	1
2985	75.4579	30.097	85.9	1.44e-18	6	206	134	30097	273	270	dapB	74	251	WP_102188064.1	47
2986	82.7839	29.646	85.9	1.44e-18	9	226	125	29646	273	270	dapB	70	251	WP_023984218.1	35
2987	98.5348	27.881	85.5	1.54e-18	10	269	159	27881	273	270	dapB	6	238	WP_033150638.1	1
2988	100.366	27.737	85.9	1.76e-18	9	274	166	27737	273	270	dapB	6	251	CCY82523.1	1
2989	71.0623	29.897	85.9	1.8e-18	4	194	113	29897	273	251	dapB	74	233	WP_036870276.1	47
2990	81.3187	29.279	85.9	1.85e-18	6	222	142	29279	273	268	dapB	60	249	WP_004347604.1	30
2991	91.2088	30.12	85.9	1.85e-18	7	249	151	30120	273	270	dapB	41	251	CCY15961.1	7
2992	75.8242	30.435	85.5	1.88e-18	6	207	119	30435	273	270	dapB	74	238	WP_073210551.1	47
2993	101.099	27.899	85.5	1.95e-18	9	276	163	27899	273	270	dapB	6	251	WP_104369156.1	1
2994	73.6264	30.348	85.5	1.97e-18	5	201	126	30348	273	270	dapB	74	237	WP_091853915.1	47
2995	98.5348	27.881	85.5	2.04e-18	10	269	159	27881	273	270	dapB	6	238	WP_013064531.1	1
2996	75.8242	31.401	85.5	2.26e-18	6	207	131	31401	273	270	dapB	74	252	WP_107581474.1	47
2997	99.6337	27.206	85.5	2.29e-18	8	272	166	27206	273	268	dapB	6	249	MBA7488807.1	1
2998	75.4579	30.097	85.5	2.29e-18	5	206	134	30097	273	270	dapB	74	251	WP_172343495.1	47
2999	98.5348	27.881	85.1	2.56e-18	10	269	159	27881	273	270	dapB	6	238	WP_028906499.1	1
3000	73.6264	29.851	85.1	2.7e-18	5	201	127	29851	273	270	dapB	74	237	WP_091819159.1	47
3001	98.1685	27.612	85.1	2.75e-18	10	268	160	27612	273	270	dapB	6	237	WP_091900338.1	1
3002	75.8242	28.986	85.1	2.84e-18	5	207	135	28986	273	270	dapB	74	251	WP_006282756.1	47
3003	75.8242	28.986	85.1	3.24e-18	5	207	135	28986	273	270	dapB	74	251	WP_027453202.1	47
3004	73.2601	31	84.7	3.31e-18	6	200	126	31000	273	270	dapB	74	237	WP_091766534.1	47
3005	73.2601	31	84.7	3.48e-18	6	200	126	31000	273	270	dapB	74	237	WP_036910677.1	47
3006	75.4579	30.097	84.7	3.93e-18	6	206	134	30097	273	270	dapB	74	251	WP_107620303.1	47
3007	98.1685	27.612	84.3	4.06e-18	10	268	160	27612	273	270	dapB	6	237	WP_091915146.1	1
3008	76.1905	29.808	84.7	4.53e-18	5	208	132	29808	273	270	dapB	74	251	OKZ26401.1	47
3009	76.1905	31.25	84.7	5.05e-18	6	208	130	31250	273	270	dapB	74	252	WP_044072933.1	47
3010	76.1905	31.25	84.7	5.05e-18	6	208	130	31250	273	270	dapB	74	252	WP_022316102.1	47
3011	76.1905	29.808	84.3	5.12e-18	7	208	132	29808	273	270	dapB	74	251	WP_036892920.1	47
3012	75.8242	29.952	84.3	5.33e-18	6	207	133	29952	273	270	dapB	74	251	HAE07956.1	47
3013	101.832	25.54	84.3	6.21e-18	9	278	167	25540	273	270	dapB	6	251	WP_006044059.1	1
3014	79.1209	30.556	84.3	6.73e-18	8	216	120	30556	273	270	dapB	74	251	RKW49224.1	47
3015	76.9231	30	84	7.84e-18	6	210	129	30000	273	270	dapB	74	251	MBD9200560.1	47
3016	76.1905	29.808	84	8.5e-18	5	208	132	29808	273	270	dapB	74	251	WP_106811113.1	47
3017	73.2601	31	82.8	9.33e-18	6	200	126	31000	273	268	dapB	80	199	HBF05451.1	1
3018	76.9231	30	84	9.6e-18	6	210	129	30000	273	270	dapB	74	251	HAM28397.1	47
3019	76.9231	30	83.6	9.7e-18	6	210	129	30000	273	270	dapB	74	251	MBD9042161.1	47
3020	73.6264	30.348	83.6	1.03e-17	6	201	127	30348	273	270	dapB	74	238	WP_028912212.1	47
3021	78.022	29.108	83.6	1.16e-17	6	213	127	29108	273	270	dapB	74	251	WP_094380227.1	47
3022	76.5568	29.665	83.6	1.16e-17	5	209	131	29665	273	270	dapB	74	251	MBD8998244.1	47
3023	69.2308	31.217	83.6	1.2e-17	4	189	117	31217	273	251	dapB	74	233	CCZ14824.1	47
3024	76.1905	30.288	83.2	1.29e-17	5	208	131	30288	273	270	dapB	74	241	GAY27792.1	37
3025	101.099	27.536	83.6	1.31e-17	10	276	164	27536	273	270	dapB	6	251	WP_077197003.1	1
3026	101.832	27.338	83.2	1.54e-17	9	278	157	27338	273	268	dapB	6	248	WP_104405770.1	1
3027	76.5568	30.622	82	3.81e-17	7	209	129	30622	273	270	dapB	74	251	WP_130830510.1	47
3028	74.359	29.557	82	4.55e-17	5	203	134	29557	273	268	dapB	74	248	MBD9027460.1	47
3029	79.1209	29.63	81.6	6.18e-17	6	216	134	29630	273	268	dapB	70	249	HCJ47430.1	35
3030	81.3187	28.829	81.3	7.05e-17	6	222	143	28829	273	268	dapB	60	249	WP_023058558.1	30
3031	76.1905	30.769	81.6	7.18e-17	7	208	130	30769	273	270	dapB	74	251	CDE07016.1	47
3032	76.1905	29.327	81.3	7.19e-17	7	208	133	29327	273	270	dapB	74	251	WP_116615833.1	47
3033	81.3187	28.378	81.3	8.2e-17	6	222	144	28378	273	268	dapB	60	249	WP_036872997.1	30
3034	77.6557	30.189	81.3	8.4e-17	7	212	125	30189	273	270	dapB	74	250	CDF21304.1	47
3035	78.022	30.047	80.9	1.04e-16	6	213	121	30047	273	268	dapB	74	249	MBD9246238.1	47
3036	78.022	30.047	80.9	1.17e-16	6	213	121	30047	273	268	dapB	74	249	WP_094879155.1	47
3037	76.1905	30.288	80.9	1.31e-16	5	208	133	30288	273	270	dapB	74	253	MBD9229641.1	47
3038	79.1209	29.167	80.1	2.41e-16	6	216	131	29167	273	270	dapB	74	259	CCY03605.1	47
3039	74.7253	30.392	79.7	3.33e-16	6	204	132	30392	273	268	dapB	74	249	WP_094383047.1	47
3040	76.1905	29.808	79.3	3.5e-16	5	208	134	29808	273	270	dapB	74	253	CCZ11195.1	47
3041	75.4579	29.126	79.3	3.91e-16	5	206	136	29126	273	270	dapB	74	251	WP_036879267.1	47
3042	76.1905	28.846	78.6	8.68e-16	5	208	135	28846	273	270	dapB	74	252	HCD77818.1	47
3043	100.366	26.642	78.2	9.27e-16	9	274	165	26642	273	268	dapB	6	249	WP_005845532.1	1
3044	75.8242	30.918	77.8	1.53e-15	8	207	127	30918	273	268	dapB	74	249	WP_006949679.1	47
3045	76.1905	26.923	76.3	5.72e-15	5	208	140	26923	273	270	dapB	74	253	WP_094402357.1	47
3046	98.1685	27.239	74.7	1.51e-14	10	268	157	27239	273	268	dapB	6	235	CCX43928.1	1
3047	76.9231	27.619	75.1	1.57e-14	5	210	134	27619	273	270	dapB	74	251	WP_172272143.1	47
3048	81.3187	25.676	71.2	1.34e-13	7	222	134	25676	273	218	dapB	6	200	HAT62307.1	1
3252	102.19	44.643	225	1.16e-71	5	280	143	44643	274	274	dapF	1	297	CDE40819.1	24
3253	100.73	41.667	218	5.91e-69	1	276	157	41667	274	274	dapF	3	282	WP_172180286.1	7
3254	101.46	39.928	197	9.52e-61	1	278	163	39928	274	274	dapF	1	283	WP_125105015.1	6
3255	101.46	39.568	196	2.01e-60	1	278	164	39568	274	274	dapF	1	283	WP_053398218.1	6
3256	103.285	38.163	194	1.06e-59	7	283	159	38163	274	274	dapF	1	280	CDE86765.1	5
3257	102.19	42.5	193	1.52e-59	6	280	139	42500	274	274	dapF	1	268	WP_091825011.1	5
3258	102.92	41.489	194	1.83e-59	4	282	155	41489	274	274	dapF	1	289	CDE07122.1	10
3259	102.555	41.993	193	2.48e-59	6	281	150	41993	274	274	dapF	1	279	RKW51260.1	5
3260	101.46	38.849	192	3.93e-59	1	278	166	38849	274	274	dapF	1	279	CCX69087.1	2
3261	101.825	39.068	192	4.6e-59	3	279	165	39068	274	274	dapF	1	283	WP_094391023.1	5
3262	102.555	41.993	192	4.9e-59	6	281	150	41993	274	274	dapF	1	279	WP_025070872.1	5
3263	101.46	40.647	191	6.95e-59	5	278	147	40647	274	274	dapF	1	267	WP_028907513.1	4
3264	101.825	36.918	192	7.81e-59	1	279	171	36918	274	274	dapF	1	283	WP_091901872.1	5
3265	102.555	41.993	191	1.14e-58	6	281	150	41993	274	274	dapF	1	279	WP_004381418.1	5
3266	102.19	39.286	191	1.45e-58	4	280	162	39286	274	274	dapF	1	282	MBD9027334.1	5
3267	104.38	38.112	191	2.67e-58	3	286	165	38112	274	274	dapF	1	290	HCJ46628.1	5
3268	100.73	41.304	189	4.25e-58	5	276	148	41304	274	272	dapF	1	270	CCY15621.1	5
3269	102.555	40.925	189	6.49e-58	6	281	153	40925	274	274	dapF	1	279	WP_028899778.1	5
3270	102.92	40.426	189	1.14e-57	4	282	159	40426	274	274	dapF	1	285	CCY03069.1	5
3271	102.19	38.929	189	1.27e-57	4	280	163	38929	274	274	dapF	1	282	MBD9034852.1	5
3272	102.92	38.298	189	1.35e-57	4	282	160	38298	274	272	dapF	1	282	CCZ11494.1	5
3273	102.92	37.943	187	4.01e-57	4	282	161	37943	274	272	dapF	1	282	MBD9229652.1	5
3274	102.555	38.79	187	7.37e-57	4	281	162	38790	274	274	dapF	1	283	CCY66271.1	6
3275	101.825	38.71	187	8.06e-57	2	279	166	38710	274	274	dapF	1	283	CDA94391.1	5
3276	102.19	41.786	186	9.22e-57	6	280	141	41786	274	274	dapF	1	267	WP_033149584.1	4
3277	101.46	38.849	186	9.68e-57	1	278	166	38849	274	274	dapF	1	283	CCY84375.1	6
3278	102.19	41.786	186	1.04e-56	6	280	141	41786	274	274	dapF	1	267	WP_013063306.1	4
3279	102.19	41.786	186	1.36e-56	6	280	141	41786	274	274	dapF	1	267	WP_073047456.1	4
3280	105.109	37.847	186	1.52e-56	5	288	152	37847	274	274	dapF	1	279	WP_117663871.1	5
3281	101.095	39.711	185	1.81e-56	4	277	147	39711	274	274	dapF	3	272	WP_036914123.1	11
3282	101.46	39.568	185	2.44e-56	1	278	164	39568	274	274	dapF	1	283	CCX64947.1	6
3283	101.46	39.209	185	2.68e-56	5	278	147	39209	274	272	dapF	1	271	WP_028911506.1	10
3284	101.825	41.219	184	6.95e-56	5	279	144	41219	274	274	dapF	1	267	WP_091862311.1	4
3285	101.095	39.711	184	7.53e-56	4	277	147	39711	274	274	dapF	3	272	WP_103915345.1	11
3286	106.569	35.959	183	3.32e-55	6	292	168	35959	274	274	dapF	1	295	WP_155714873.1	5
3287	101.825	37.634	183	3.48e-55	4	279	168	37634	274	274	dapF	1	283	WP_084608609.1	6
3288	100.365	37.818	182	3.63e-55	1	275	166	37818	274	270	dapF	1	279	WP_172177736.1	5
3289	101.095	39.35	182	3.68e-55	4	277	148	39350	274	274	dapF	3	272	WP_091766935.1	11
3290	102.19	36.786	182	4.02e-55	1	280	171	36786	274	274	dapF	1	284	WP_094382598.1	5
3291	102.19	38.214	182	4.61e-55	5	280	163	38214	274	274	dapF	1	280	WP_094880237.1	5
3292	102.19	38.214	182	4.92e-55	5	280	163	38214	274	274	dapF	1	280	MBD9247168.1	5
3293	99.2701	37.868	182	6.6e-55	1	272	165	37868	274	270	dapF	3	279	WP_172344099.1	8
3294	102.555	37.367	182	7.38e-55	3	281	169	37367	274	274	dapF	1	285	WP_024989438.1	5
3295	102.19	40	181	1.12e-54	5	280	146	40000	274	274	dapF	1	267	WP_074760975.1	4
3296	102.555	38.078	181	1.18e-54	5	281	151	38078	274	272	dapF	1	271	WP_092071759.1	5
3297	105.839	37.586	181	1.19e-54	6	290	144	37586	274	270	dapF	3	280	WP_091960707.1	6
3298	100.365	39.636	181	1.47e-54	3	275	159	39636	274	270	dapF	1	276	WP_029904045.1	4
3299	104.745	37.979	180	2.29e-54	7	287	159	37979	274	274	dapF	1	285	WP_173651873.1	5
3300	104.38	40.559	180	2.39e-54	6	286	147	40559	274	272	dapF	1	284	WP_172272870.1	8
3301	105.109	36.458	180	2.95e-54	4	288	156	36458	274	274	dapF	1	279	WP_118190656.1	5
3302	100.73	40.58	179	3.39e-54	5	276	146	40580	274	274	dapF	3	267	WP_091838509.1	6
3303	106.569	35.616	180	3.56e-54	5	292	169	35616	274	274	dapF	1	295	WP_009434761.1	5
3304	105.109	36.458	180	3.82e-54	4	288	156	36458	274	274	dapF	1	279	WP_117728401.1	5
3305	101.46	37.77	179	4.3e-54	2	278	163	37770	274	272	dapF	1	279	WP_044074675.1	6
3306	101.46	37.77	179	4.74e-54	2	278	163	37770	274	272	dapF	1	279	WP_044066172.1	6
3307	101.46	37.77	179	6.98e-54	2	278	163	37770	274	272	dapF	1	279	WP_044073041.1	6
3308	101.46	37.77	179	6.98e-54	2	278	163	37770	274	272	dapF	1	279	WP_044080738.1	6
3309	101.46	37.77	179	7.61e-54	2	278	163	37770	274	272	dapF	1	279	WP_022316641.1	6
3310	101.46	37.77	179	7.61e-54	2	278	163	37770	274	272	dapF	1	279	WP_022316641.1	6
3311	103.285	37.456	179	7.97e-54	5	283	159	37456	274	274	dapF	1	278	CDC24420.1	5
3312	105.474	37.024	179	8.91e-54	6	289	153	37024	274	274	dapF	1	279	CDA57875.1	5
3313	105.109	36.458	179	1e-53	5	288	156	36458	274	274	dapF	1	279	WP_118116346.1	5
3314	102.19	38.929	178	1.12e-53	3	280	161	38929	274	274	dapF	1	280	WP_106811496.1	5
3315	105.109	36.458	178	1.2e-53	5	288	156	36458	274	274	dapF	1	279	MBD8970881.1	5
3316	103.285	37.456	178	1.38e-53	5	283	159	37456	274	274	dapF	1	278	MBD9072402.1	5
3317	105.474	36.678	178	1.39e-53	6	289	154	36678	274	274	dapF	1	279	MBD9271999.1	5
3318	104.745	37.631	178	1.76e-53	7	287	160	37631	274	274	dapF	1	285	WP_006281330.1	5
3319	104.745	37.631	178	1.83e-53	7	287	160	37631	274	274	dapF	1	285	WP_094448382.1	5
3320	103.285	37.102	177	4.96e-53	5	283	160	37102	274	274	dapF	1	278	WP_158462413.1	5
3321	102.19	39.286	176	5.87e-53	6	280	148	39286	274	274	dapF	1	266	WP_033147513.1	3
3322	101.46	37.41	176	6.96e-53	5	278	163	37410	274	274	dapF	3	280	WP_092112582.1	8
3323	102.19	37.143	176	8.42e-53	3	280	167	37143	274	274	dapF	1	281	CDF22790.1	5
3324	101.825	39.785	176	1.1e-52	6	279	148	39785	274	274	dapF	1	266	WP_028904104.1	3
3325	103.285	37.102	176	1.28e-52	5	283	162	37102	274	274	dapF	1	280	MBD8997203.1	5
3326	103.285	37.102	175	1.81e-52	5	283	160	37102	274	274	dapF	1	278	HCD64765.1	5
3327	103.65	40.141	175	2.11e-52	7	284	142	40141	274	272	dapF	3	275	WP_091851260.1	6
3328	100.73	38.043	174	2.49e-52	5	276	148	38043	274	272	dapF	6	262	SFO82149.1	1
3329	101.46	38.489	175	2.8e-52	3	278	165	38489	274	272	dapF	1	282	WP_028910405.1	5
3330	106.569	37.329	175	2.88e-52	5	292	161	37329	274	274	dapF	1	292	CDB05275.1	5
3331	103.285	37.102	175	3.35e-52	5	283	160	37102	274	274	dapF	1	278	MBD9261039.1	5
3332	102.92	40.071	174	3.55e-52	7	282	141	40071	274	270	dapF	3	273	WP_091816575.1	6
3333	102.19	37.857	174	5.72e-52	1	280	168	37857	274	274	dapF	1	284	WP_094378507.1	5
3334	105.109	37.153	174	6.16e-52	4	288	154	37153	274	274	dapF	1	279	RGS46204.1	5
3335	105.109	37.5	173	9.79e-52	5	288	153	37500	274	274	dapF	1	279	MBD8993889.1	5
3336	105.109	37.5	173	1.75e-51	5	288	153	37500	274	274	dapF	1	279	WP_089545268.1	5
3337	105.109	37.5	173	1.75e-51	5	288	153	37500	274	274	dapF	1	279	WP_089545268.1	5
3338	100.73	38.768	172	2e-51	5	276	159	38768	274	270	dapF	1	276	OKZ25397.1	5
3339	102.555	37.722	172	3e-51	5	281	162	37722	274	274	dapF	1	279	WP_153128719.1	5
3340	105.109	37.5	172	4.14e-51	5	288	153	37500	274	274	dapF	1	279	WP_118313224.1	5
3341	105.109	36.806	172	4.24e-51	4	288	155	36806	274	274	dapF	1	279	WP_144151086.1	5
3342	105.109	36.806	172	4.28e-51	4	288	155	36806	274	274	dapF	1	279	WP_154482384.1	5
3343	103.65	38.028	172	4.55e-51	4	284	162	38028	274	274	dapF	1	284	WP_007899428.1	5
3344	103.65	38.028	172	4.7e-51	4	284	162	38028	274	274	dapF	1	284	WP_118355637.1	5
3345	105.109	36.806	171	5.19e-51	4	288	155	36806	274	274	dapF	1	279	HAW84271.1	5
3346	105.109	36.806	171	5.3e-51	4	288	155	36806	274	274	dapF	1	279	MUU03790.1	5
3347	103.285	39.576	171	5.61e-51	7	283	154	39576	274	274	dapF	1	279	WP_007135186.1	5
3348	105.109	36.806	171	5.78e-51	4	288	155	36806	274	274	dapF	1	279	WP_118201869.1	5
3349	105.109	36.806	171	5.92e-51	4	288	155	36806	274	274	dapF	1	281	EFB33692.1	7
3350	105.109	36.806	171	5.92e-51	4	288	155	36806	274	274	dapF	1	281	EFB33692.1	7
3351	100.365	38.545	171	6.55e-51	3	275	162	38545	274	274	dapF	6	274	CDA42701.1	1
3352	105.109	36.806	171	6.58e-51	4	288	155	36806	274	274	dapF	1	279	RGX95783.1	5
3353	105.109	36.806	171	7.42e-51	4	288	155	36806	274	274	dapF	1	279	WP_118255497.1	5
3354	105.109	36.806	171	8.16e-51	4	288	155	36806	274	274	dapF	1	279	WP_040553946.1	5
3355	105.109	36.806	171	8.16e-51	4	288	155	36806	274	274	dapF	1	279	WP_153094193.1	5
3356	105.109	36.806	171	8.17e-51	4	288	155	36806	274	274	dapF	1	279	WP_153138941.1	5
3357	105.109	36.458	171	8.44e-51	4	288	156	36458	274	274	dapF	1	279	WP_118139672.1	5
3358	105.109	36.806	171	8.44e-51	4	288	155	36806	274	274	dapF	1	279	WP_118153064.1	5
3359	105.109	36.806	171	8.52e-51	4	288	155	36806	274	274	dapF	1	279	WP_153073376.1	5
3360	105.109	36.806	171	8.53e-51	4	288	155	36806	274	274	dapF	1	279	QNT66709.1	5
3361	105.109	37.153	171	9.79e-51	4	288	154	37153	274	274	dapF	1	279	MBD9060183.1	5
3362	105.109	36.806	171	1.03e-50	4	288	155	36806	274	274	dapF	1	279	WP_153113448.1	5
3363	102.555	37.367	171	1.04e-50	5	281	162	37367	274	274	dapF	1	278	WP_094387096.1	5
3364	105.109	36.806	171	1.23e-50	4	288	155	36806	274	274	dapF	1	279	WP_118417084.1	5
3365	105.109	36.458	171	1.3e-50	4	288	156	36458	274	274	dapF	1	279	WP_153080572.1	5
3366	103.285	38.516	171	1.44e-50	5	283	161	38516	274	274	dapF	1	283	WP_094400398.1	5
3367	105.839	36.552	171	1.46e-50	6	290	163	36552	274	274	dapF	1	289	HCN52577.1	5
3368	105.109	36.458	170	1.63e-50	4	288	156	36458	274	274	dapF	1	279	WP_153084859.1	5
3369	105.109	36.458	170	1.66e-50	4	288	156	36458	274	274	dapF	1	279	WP_153082122.1	5
3370	105.109	36.458	170	1.66e-50	4	288	156	36458	274	274	dapF	1	279	CDA67263.1	5
3371	101.825	39.068	171	1.74e-50	7	279	152	39068	274	270	dapF	3	287	EGN57628.1	16
3372	103.65	38.028	170	2.01e-50	4	284	162	38028	274	274	dapF	1	284	HAH77101.1	5
3373	106.204	37.113	170	2.05e-50	4	291	150	37113	274	272	dapF	1	280	WP_073207826.1	4
3374	105.109	36.458	170	2.06e-50	4	288	156	36458	274	274	dapF	1	279	WP_153118579.1	5
3375	101.825	39.068	170	2.18e-50	7	279	152	39068	274	270	dapF	3	285	WP_040558978.1	14
3376	105.109	36.806	170	2.24e-50	4	288	155	36806	274	274	dapF	1	279	MBD9086522.1	5
3377	105.109	36.458	170	2.29e-50	4	288	156	36458	274	274	dapF	1	279	WP_153093071.1	5
3378	102.19	37.5	170	2.43e-50	4	280	165	37500	274	274	dapF	1	280	WP_068856656.1	5
3379	103.65	38.028	170	2.55e-50	4	284	162	38028	274	274	dapF	1	284	MBD8937690.1	5
3380	105.109	36.458	169	3.49e-50	4	288	156	36458	274	274	dapF	1	279	WP_118080147.1	5
3381	102.555	37.011	169	4.78e-50	5	281	163	37011	274	274	dapF	1	278	HAG32648.1	5
3382	103.285	38.516	169	6.17e-50	7	283	157	38516	274	274	dapF	1	279	WP_021824464.1	5
3383	105.109	36.111	169	6.86e-50	4	288	157	36111	274	274	dapF	1	279	MQO97119.1	5
3384	105.109	36.111	168	9.29e-50	4	288	157	36111	274	274	dapF	1	279	WP_153084128.1	5
3385	105.109	36.458	168	9.38e-50	4	288	156	36458	274	274	dapF	1	279	RHK07589.1	5
3386	105.109	36.458	168	9.58e-50	4	288	156	36458	274	274	dapF	1	279	WP_117693531.1	5
3387	84.6715	40.086	167	1.22e-49	3	232	117	40086	274	220	dapF	1	227	HCD77376.1	6
3388	102.555	36.655	168	1.34e-49	5	281	164	36655	274	274	dapF	1	278	WP_094422991.1	5
3389	105.109	36.458	167	1.91e-49	4	288	156	36458	274	274	dapF	1	279	RHK47472.1	5
[truncated: 23,273 more rows]

## Sheet: Under cut-off
	% alignment	% id	bitscore	evalue	gapopen	length	mismatch	pident	prot length	qend	qseqid	qstart	send	sseqid	sstart
0	56.4263	26.111	55.8	2.34e-07	4	180	118	26111	319	244	accA	70	449	CCX44667.1	280
1	59.2476	25.397	53.5	1.24e-06	5	189	125	25397	319	251	accA	69	456	WP_029903966.1	278
2	46.7085	26.846	50.8	9.5e-06	2	149	97	26846	319	243	accA	99	448	MBD9036265.1	308
3	46.7085	26.846	50.8	9.76e-06	2	149	97	26846	319	243	accA	99	448	MBD9028007.1	308
4	47.0219	26	50.4	1.36e-05	2	150	99	26000	319	244	accA	99	449	WP_094879566.1	308
5	45.1411	25.694	50.1	1.85e-05	2	144	95	25694	319	238	accA	99	443	WP_027450071.1	308
6	45.1411	25.694	49.7	2.13e-05	2	144	95	25694	319	238	accA	99	443	WP_091819125.1	308
7	47.0219	25.333	49.3	3.21e-05	2	150	100	25333	319	244	accA	99	449	WP_007896900.1	308
8	36.0502	25.217	48.5	3.79e-05	1	115	78	25217	319	213	accA	99	170	MBD9200536.1	64
9	47.0219	24.667	48.9	3.82e-05	2	150	101	24667	319	244	accA	99	449	WP_006950598.1	308
10	47.0219	25.333	48.9	3.83e-05	2	150	100	25333	319	244	accA	99	449	WP_106812713.1	308
11	47.0219	25.333	48.9	3.86e-05	2	150	100	25333	319	244	accA	99	449	CDB04496.1	308
12	47.0219	24.667	48.1	3.98e-05	2	150	101	24667	319	244	accA	99	182	MQO90162.1	41
13	54.5455	24.713	48.9	3.99e-05	4	174	116	24713	319	238	accA	70	443	CDE40953.1	280
14	52.0376	25.301	48.9	4.9e-05	3	166	110	25301	319	260	accA	99	463	CDF22244.1	308
15	47.0219	24.667	47.4	5.78e-05	2	150	101	24667	319	244	accA	99	156	MQN34542.1	15
16	36.0502	25.217	48.5	5.87e-05	1	115	78	25217	319	213	accA	99	414	WP_018462277.1	308
17	56.1129	24.581	48.5	5.9e-05	4	179	120	24581	319	244	accA	71	449	CDE58243.1	281
18	47.0219	24.667	48.5	6.08e-05	2	150	101	24667	319	244	accA	99	449	WP_077195866.1	308
19	36.0502	25.217	47.8	7.01e-05	1	115	78	25217	319	213	accA	99	175	CCZ12121.1	69
20	50.1567	24.375	48.1	7.33e-05	3	160	98	24375	319	257	accA	99	445	WP_172275592.1	308
21	45.1411	25	48.1	7.94e-05	2	144	96	25000	319	238	accA	99	443	WP_091958858.1	308
22	45.1411	25	48.1	8.53e-05	2	144	96	25000	319	238	accA	99	443	WP_092071890.1	308
23	45.1411	25	47.8	9.4e-05	2	144	96	25000	319	238	accA	99	443	WP_094391598.1	308
24	45.1411	25	47.8	9.92e-05	2	144	96	25000	319	238	accA	99	443	WP_103915874.1	308
25	45.1411	25	47.8	0.0001	2	144	96	25000	319	238	accA	99	443	WP_091841891.1	308
26	45.1411	25	47.8	0.0001	2	144	96	25000	319	238	accA	99	443	WP_073210216.1	308
27	52.0376	25.301	47.8	0.000101	3	166	110	25301	319	260	accA	99	463	WP_104405403.1	308
28	45.1411	25	47.8	0.000103	2	144	96	25000	319	238	accA	99	443	WP_091899545.1	308
29	45.1411	23.611	47.8	0.000105	2	144	98	23611	319	238	accA	99	443	WP_040595394.1	308
30	45.1411	25	47.8	0.000106	2	144	96	25000	319	238	accA	99	443	WP_036912322.1	308
31	45.1411	25	47.8	0.000107	2	144	96	25000	319	238	accA	99	443	WP_028903587.1	308
32	45.1411	23.611	47.8	0.000108	2	144	98	23611	319	238	accA	99	462	EGQ18231.1	327
33	36.0502	25.217	47.8	0.000109	1	115	78	25217	319	213	accA	99	414	WP_006282293.1	308
34	47.0219	25.333	47.8	0.000112	2	150	100	25333	319	244	accA	99	449	RGX93601.1	308
35	45.1411	25	47.8	0.000115	2	144	96	25000	319	238	accA	99	443	WP_013063032.1	308
36	45.1411	25	47.4	0.000117	2	144	96	25000	319	238	accA	99	443	WP_028908505.1	308
37	45.1411	25	47.4	0.000117	2	144	96	25000	319	238	accA	99	443	WP_091765343.1	308
38	45.1411	23.611	47.4	0.000118	2	144	98	23611	319	238	accA	99	443	WP_004362719.1	308
39	45.1411	25	47.4	0.000123	2	144	96	25000	319	238	accA	99	443	WP_028913290.1	308
40	46.7085	24.161	47.4	0.000125	2	149	101	24161	319	243	accA	99	448	WP_126677821.1	308
41	45.1411	23.611	47.4	0.000125	2	144	98	23611	319	238	accA	99	443	WP_004366214.1	308
42	45.1411	23.611	47.4	0.000126	2	144	98	23611	319	238	accA	99	443	WP_088399518.1	308
43	45.1411	24.306	47.4	0.000128	2	144	97	24306	319	238	accA	99	443	WP_088437823.1	308
44	49.2163	26.752	47.4	0.000129	4	157	99	26752	319	237	accA	85	442	CDE85857.1	298
45	49.5298	24.684	47.4	0.00013	3	158	106	24684	319	251	accA	99	457	WP_125234568.1	308
46	56.4263	27.222	47.4	0.000131	7	180	110	27222	319	241	accA	70	445	CCY64884.1	279
47	45.1411	24.306	47.4	0.000131	2	144	97	24306	319	238	accA	99	443	WP_099983345.1	308
48	36.0502	25.217	47.4	0.000131	1	115	78	25217	319	213	accA	99	414	MBD9042343.1	308
49	45.1411	24.306	47.4	0.000137	2	144	97	24306	319	238	accA	99	443	WP_099995778.1	308
50	45.1411	24.306	47.4	0.000137	2	144	97	24306	319	238	accA	99	443	WP_097648363.1	308
51	45.1411	24.306	47.4	0.000137	2	144	97	24306	319	238	accA	99	443	WP_024999233.1	308
52	45.1411	24.306	47.4	0.00014	2	144	97	24306	319	238	accA	99	443	WP_061869442.1	308
53	45.1411	24.306	47.4	0.00014	2	144	97	24306	319	238	accA	99	443	WP_100018733.1	308
54	45.1411	24.306	47.4	0.000141	2	144	97	24306	319	238	accA	99	443	WP_028906284.1	308
55	47.0219	24.667	47.4	0.000142	2	150	101	24667	319	244	accA	99	449	WP_036877128.1	308
56	45.1411	24.306	47.4	0.000145	2	144	97	24306	319	238	accA	99	443	WP_100015901.1	308
57	47.0219	24.667	47.4	0.000147	2	150	101	24667	319	244	accA	99	449	MBD9298895.1	308
58	45.1411	24.306	47.4	0.000149	2	144	97	24306	319	238	accA	99	443	WP_014709993.1	308
59	45.1411	24.306	47.4	0.000149	2	144	97	24306	319	238	accA	99	443	WP_045167135.1	308
60	45.1411	24.306	47.4	0.000155	2	144	97	24306	319	238	accA	99	443	WP_097550945.1	308
61	47.0219	24	47.4	0.000155	2	150	102	24000	319	244	accA	99	449	WP_021668366.1	308
62	47.0219	24	47	0.00016	2	150	102	24000	319	244	accA	99	449	WP_036882613.1	308
63	45.1411	24.306	47	0.000163	2	144	97	24306	319	238	accA	99	443	WP_097655880.1	308
64	49.2163	26.115	47	0.000166	4	157	100	26115	319	237	accA	85	455	CDA42745.1	311
65	47.0219	24	47	0.000172	2	150	102	24000	319	244	accA	99	449	WP_107582551.1	308
66	47.0219	24.667	47	0.000175	2	150	101	24667	319	244	accA	99	449	WP_153095859.1	308
67	36.0502	25.217	47	0.000175	1	115	78	25217	319	213	accA	99	414	WP_024989214.1	308
68	47.0219	24.667	47	0.00018	2	150	101	24667	319	244	accA	99	449	WP_134844060.1	308
69	47.0219	24.667	47	0.00018	2	150	101	24667	319	244	accA	99	449	WP_117692788.1	308
70	47.0219	24.667	47	0.000181	2	150	101	24667	319	244	accA	99	449	WP_089544577.1	308
71	47.0219	24.667	47	0.000183	2	150	101	24667	319	244	accA	99	449	CDA54872.1	308
72	47.0219	24.667	47	0.000183	2	150	101	24667	319	244	accA	99	449	WP_153082034.1	308
73	47.0219	24.667	47	0.000183	2	150	101	24667	319	244	accA	99	449	WP_006846888.1	308
74	47.0219	24.667	47	0.000183	2	150	101	24667	319	244	accA	99	449	WP_118151893.1	308
75	47.0219	24.667	47	0.000185	2	150	101	24667	319	244	accA	99	449	WP_118065415.1	308
76	47.0219	24.667	47	0.000185	2	150	101	24667	319	244	accA	99	449	WP_118116975.1	308
77	47.0219	24	47	0.000186	2	150	102	24000	319	244	accA	99	449	WP_004355186.1	308
78	45.1411	23.611	47	0.000186	2	144	98	23611	319	238	accA	99	443	WP_048740421.1	308
79	45.1411	23.611	47	0.000186	2	144	98	23611	319	238	accA	99	443	WP_036861974.1	308
80	47.0219	24.667	47	0.00019	2	150	101	24667	319	244	accA	99	449	WP_153093362.1	308
81	47.0219	24.667	47	0.00019	2	150	101	24667	319	244	accA	99	449	WP_022252633.1	308
82	23.511	32	46.6	0.000192	1	75	43	32000	319	173	accA	99	374	MBD9058019.1	308
83	47.0219	24.667	47	0.000195	2	150	101	24667	319	244	accA	99	449	WP_153091486.1	308
84	47.0219	24.667	47	0.000198	2	150	101	24667	319	244	accA	99	449	WP_117726979.1	308
85	47.0219	24.667	47	0.000198	2	150	101	24667	319	244	accA	99	449	WP_117661639.1	308
86	45.1411	23.611	47	0.0002	2	144	98	23611	319	238	accA	99	443	WP_100022379.1	308
87	47.0219	24	47	0.0002	2	150	102	24000	319	244	accA	99	449	WP_021589703.1	308
88	45.1411	23.611	46.6	0.000207	2	144	98	23611	319	238	accA	99	443	WP_004338671.1	308
89	47.0219	24.667	46.6	0.000215	2	150	101	24667	319	244	accA	99	449	WP_119249223.1	308
90	47.0219	24.667	46.6	0.000215	2	150	101	24667	319	244	accA	99	449	WP_118311229.1	308
91	23.511	32	46.6	0.000215	1	75	43	32000	319	173	accA	99	374	WP_153133898.1	308
92	47.0219	24.667	46.6	0.000217	2	150	101	24667	319	244	accA	99	449	WP_153085463.1	308
93	23.511	32	46.6	0.000222	1	75	43	32000	319	173	accA	99	374	MBD9059638.1	308
94	47.0219	24.667	46.6	0.000224	2	150	101	24667	319	244	accA	99	449	WP_117586267.1	308
95	47.0219	24	46.6	0.000228	2	150	102	24000	319	244	accA	99	449	WP_027444498.1	308
96	23.511	32	46.6	0.00023	1	75	43	32000	319	173	accA	99	374	MBD9074068.1	308
97	23.511	32	46.6	0.000236	1	75	43	32000	319	173	accA	99	374	WP_153129293.1	308
98	56.4263	27.778	46.6	0.000241	7	180	109	27778	319	241	accA	70	445	CCY80814.1	279
99	36.0502	25.217	46.6	0.000241	1	115	78	25217	319	213	accA	99	414	WP_028909936.1	308
100	36.0502	25.217	46.6	0.000247	1	115	78	25217	319	213	accA	99	414	CDA93888.1	308
101	52.0376	24.096	46.6	0.000254	4	166	102	24096	319	262	accA	99	451	WP_107624450.1	308
102	52.0376	24.699	46.6	0.000268	3	166	111	24699	319	260	accA	99	463	WP_025003163.1	308
103	48.9028	23.718	46.6	0.000268	3	156	105	23718	319	250	accA	99	453	WP_025072713.1	308
104	52.0376	24.096	46.6	0.00027	4	166	102	24096	319	262	accA	99	451	WP_004359500.1	308
105	52.0376	24.096	46.6	0.000273	4	166	102	24096	319	262	accA	99	451	WP_036865057.1	308
106	52.0376	24.096	46.2	0.00028	4	166	102	24096	319	262	accA	99	451	WP_025790496.1	308
107	47.0219	24	46.2	0.000283	2	150	92	24000	319	248	accA	99	435	WP_028896320.1	308
108	36.0502	25.217	46.2	0.000288	1	115	78	25217	319	213	accA	99	414	WP_135939915.1	308
109	52.0376	24.096	46.2	0.00029	4	166	102	24096	319	262	accA	99	451	WP_008822434.1	308
110	45.1411	23.611	46.2	0.000293	2	144	98	23611	319	238	accA	99	443	WP_155716516.1	308
111	45.1411	23.611	46.2	0.000293	2	144	98	23611	319	238	accA	99	443	WP_009434033.1	308
112	45.1411	23.611	46.2	0.000303	2	144	98	23611	319	238	accA	99	443	WP_004383628.1	308
113	48.9028	23.718	46.2	0.000306	3	156	105	23718	319	250	accA	99	453	WP_036927130.1	308
114	48.9028	23.718	46.2	0.000306	3	156	105	23718	319	250	accA	99	453	WP_103003371.1	308
115	36.0502	25.217	46.2	0.000312	1	115	78	25217	319	213	accA	99	414	WP_092111214.1	308
116	48.9028	23.718	46.2	0.000323	3	156	105	23718	319	250	accA	99	453	WP_008121815.1	308
117	36.0502	25.217	46.2	0.000337	1	115	78	25217	319	213	accA	99	414	WP_107621576.1	308
118	45.1411	24.306	46.2	0.000349	2	144	97	24306	319	238	accA	99	443	WP_022317092.1	308
119	23.511	30.667	46.2	0.000353	1	75	44	30667	319	173	accA	99	374	MBD9229104.1	308
120	62.3824	24.623	46.2	0.000353	6	199	125	24623	319	213	accA	20	414	HBN47212.1	236
121	23.511	30.667	46.2	0.000359	1	75	44	30667	319	173	accA	99	374	WP_005846144.1	308
122	52.0376	24.096	46.2	0.000362	4	166	102	24096	319	262	accA	99	451	WP_120175468.1	308
123	36.0502	26.087	45.8	0.000365	1	115	77	26087	319	213	accA	99	414	WP_021583959.1	308
124	36.0502	25.217	45.8	0.000387	1	115	78	25217	319	213	accA	99	418	ERT62117.1	312
125	23.511	30.667	45.8	0.000407	1	75	44	30667	319	173	accA	99	374	WP_130828988.1	308
126	36.0502	25.217	45.8	0.000412	1	115	78	25217	319	213	accA	99	414	MBD8997520.1	308
127	23.511	30.667	45.8	0.000414	1	75	44	30667	319	173	accA	99	374	WP_007574269.1	308
128	36.0502	25.217	45.8	0.000414	1	115	78	25217	319	213	accA	99	414	WP_036878404.1	308
129	36.0502	25.217	45.8	0.000417	1	115	78	25217	319	213	accA	99	414	WP_004350058.1	308
130	36.0502	25.217	45.8	0.000417	1	115	78	25217	319	213	accA	99	414	WP_102697128.1	308
131	52.0376	24.096	45.8	0.000417	4	166	102	24096	319	262	accA	99	451	WP_021671542.1	308
132	36.0502	25.217	45.8	0.000417	1	115	78	25217	319	213	accA	99	414	WP_036872412.1	308
133	23.511	30.667	45.8	0.000417	1	75	44	30667	319	173	accA	99	374	WP_094399941.1	308
134	52.0376	24.096	45.8	0.000421	4	166	102	24096	319	262	accA	99	451	WP_050696287.1	308
135	33.5423	28.972	45.8	0.000421	3	107	61	28972	319	173	accA	70	374	MBA7488393.1	280
136	45.1411	23.611	45.8	0.000429	2	144	98	23611	319	238	accA	99	443	WP_029216528.1	308
137	45.1411	23.611	45.8	0.000433	2	144	98	23611	319	238	accA	99	443	WP_036854378.1	308
138	56.4263	24.444	45.8	0.000443	5	180	118	24444	319	260	accA	85	463	CCY15918.1	298
139	45.1411	23.611	45.8	0.000448	2	144	98	23611	319	238	accA	99	443	WP_004353470.1	308
140	33.5423	28.972	45.8	0.000452	3	107	61	28972	319	173	accA	70	374	MBB1529653.1	280
141	45.1411	23.611	45.8	0.000456	2	144	98	23611	319	238	accA	99	443	WP_007366289.1	308
142	23.511	30.667	45.4	0.000456	1	75	44	30667	319	173	accA	99	374	RKW62585.1	308
143	33.5423	28.972	45.8	0.000468	3	107	61	28972	319	173	accA	70	374	MBB1539616.1	280
144	47.0219	24	45.8	0.000468	2	150	102	24000	319	244	accA	99	449	WP_094388266.1	308
145	40.4389	25.581	45.4	0.000484	2	129	84	25581	319	213	accA	85	414	WP_021992315.1	298
146	23.511	30.667	45.4	0.000485	1	75	44	30667	319	173	accA	99	374	WP_009161508.1	308
147	23.511	30.667	44.7	0.000487	1	75	44	30667	319	173	accA	99	100	RKW61603.1	34
148	47.0219	24.667	45.4	0.000492	2	150	101	24667	319	244	accA	99	449	CCY64219.1	308
149	47.0219	24	45.4	0.000521	2	150	102	24000	319	244	accA	99	449	HAG33109.1	308
150	47.0219	24	45.4	0.000526	2	150	102	24000	319	244	accA	99	449	WP_022311082.1	308
151	36.0502	26.087	45.4	0.000529	1	115	77	26087	319	213	accA	99	414	WP_172345150.1	308
152	47.0219	24	45.4	0.000535	2	150	102	24000	319	244	accA	99	449	WP_094422182.1	308
153	23.511	30.667	45.4	0.000617	1	75	44	30667	319	173	accA	99	374	WP_036895935.1	308
154	36.0502	26.087	45.4	0.00062	1	115	77	26087	319	213	accA	99	414	WP_021854126.1	308
155	23.511	30.667	45.4	0.000626	1	75	44	30667	319	173	accA	99	374	WP_018361377.1	308
156	23.511	30.667	45.4	0.000633	1	75	44	30667	319	173	accA	99	374	WP_007174224.1	308
157	23.511	30.667	45.4	0.000639	1	75	44	30667	319	173	accA	99	374	HCJ47255.1	308
158	23.511	29.333	45.1	0.00065	1	75	45	29333	319	173	accA	99	374	WP_025877481.1	308
159	23.511	30.667	45.1	0.000654	1	75	44	30667	319	173	accA	99	374	WP_009227727.1	308
160	23.511	30.667	45.1	0.000656	1	75	44	30667	319	173	accA	99	374	WP_004376119.1	308
161	23.511	30.667	45.1	0.000656	1	75	44	30667	319	173	accA	99	374	WP_091825767.1	308
162	23.511	30.667	45.1	0.000668	1	75	44	30667	319	173	accA	99	374	WP_004370946.1	308
163	23.511	29.333	45.1	0.000674	1	75	45	29333	319	173	accA	99	374	WP_060941507.1	308
164	23.511	30.667	45.1	0.00068	1	75	44	30667	319	173	accA	99	374	WP_036891721.1	308
165	69.279	23.529	32.7	6.1	9	221	128	23529	319	229	accA	25	196	WP_036891721.1	1
166	45.1411	22.917	45.1	0.000698	2	144	99	22917	319	238	accA	99	443	WP_006952475.1	308
167	45.1411	23.611	45.1	0.000702	2	144	98	23611	319	238	accA	99	443	CCX66847.1	308
168	23.511	30.667	45.1	0.000756	1	75	44	30667	319	173	accA	99	374	WP_110370343.1	308
169	36.0502	26.087	45.1	0.000767	1	115	77	26087	319	213	accA	99	414	CCY80472.1	308
170	23.511	30.667	45.1	0.000783	1	75	44	30667	319	173	accA	99	374	WP_009235344.1	308
171	23.511	30.667	45.1	0.000797	1	75	44	30667	319	173	accA	99	374	WP_007133823.1	308
172	23.511	30.667	45.1	0.000804	1	75	44	30667	319	173	accA	99	374	WP_008566496.1	308
173	23.511	30.667	45.1	0.000811	1	75	44	30667	319	173	accA	99	374	WP_019967565.1	308
174	47.0219	23.333	45.1	0.000818	2	150	103	23333	319	244	accA	99	449	WP_028898689.1	308
175	23.511	30.667	45.1	0.000826	1	75	44	30667	319	173	accA	99	374	WP_070722707.1	308
176	45.1411	22.222	45.1	0.000826	2	144	100	22222	319	238	accA	99	443	WP_008450489.1	308
177	23.511	30.667	45.1	0.000833	1	75	44	30667	319	173	accA	99	374	WP_018966293.1	308
178	23.511	30.667	45.1	0.00084	1	75	44	30667	319	173	accA	99	374	WP_009229806.1	308
179	45.1411	22.222	45.1	0.00084	2	144	100	22222	319	238	accA	99	443	WP_060933431.1	308
180	36.0502	25.217	44.7	0.000863	1	115	78	25217	319	213	accA	99	414	WP_104368888.1	308
181	47.0219	23.333	44.7	0.000871	2	150	103	23333	319	244	accA	99	449	WP_004379732.1	308
182	47.0219	22.667	44.7	0.000886	2	150	104	22667	319	244	accA	99	449	WP_025070794.1	308
183	23.511	30.667	44.7	0.001	1	75	44	30667	319	173	accA	99	374	WP_023983265.1	308
184	23.511	30.667	44.7	0.001	1	75	44	30667	319	173	accA	99	374	WP_004370328.1	308
185	36.0502	25.217	44.3	0.001	1	115	78	25217	319	213	accA	99	414	WP_115154242.1	308
186	23.511	30.667	43.9	0.001	1	75	44	30667	319	173	accA	99	374	WP_048799615.1	308
187	36.0502	25.217	44.3	0.001	1	115	78	25217	319	213	accA	99	414	QJR97971.1	308
188	23.511	30.667	44.3	0.001	1	75	44	30667	319	173	accA	99	374	WP_116616744.1	308
189	69.279	23.529	32.7	6.4	9	221	128	23529	319	229	accA	25	196	WP_116616744.1	1
190	36.0502	25.217	44.3	0.001	1	115	78	25217	319	213	accA	99	414	WP_004346741.1	308
191	36.0502	25.217	44.3	0.001	1	115	78	25217	319	213	accA	99	414	WP_004342362.1	308
192	52.0376	22.892	44.3	0.001	4	166	104	22892	319	262	accA	99	451	WP_025001736.1	308
193	36.0502	24.348	44.3	0.001	1	115	79	24348	319	213	accA	99	414	HAT62520.1	308
194	36.0502	24.348	43.1	0.002	1	115	79	24348	319	213	accA	99	129	CCY01492.1	23
195	36.0502	24.348	43.5	0.002	1	115	79	24348	319	213	accA	99	414	WP_172173808.1	308
196	45.1411	22.917	42.7	0.004	2	144	99	22917	319	238	accA	99	443	WP_118866830.1	308
197	36.0502	24.348	42.7	0.004	1	115	79	24348	319	213	accA	99	414	WP_094385582.1	308
198	36.0502	24.348	42.7	0.004	1	115	79	24348	319	213	accA	99	414	WP_094381169.1	308
199	36.0502	25.217	42.7	0.004	1	115	78	25217	319	213	accA	99	414	HCN53655.1	308
200	33.8558	25	39.7	0.02	1	108	77	25000	319	244	accA	141	122	MQO84094.1	15
201	24.1379	28.571	37	0.24	2	77	44	28571	319	74	accA	9	122	WP_125233724.1	46
202	26.0188	24.096	34.7	1.4	3	83	51	24096	319	74	accA	3	123	WP_180970826.1	42
203	47.6489	24.342	34.3	1.4	7	152	86	24342	319	138	accA	9	190	WP_025001671.1	46
204	26.0188	24.096	34.7	1.4	3	83	51	24096	319	74	accA	3	122	PMC24166.1	41
205	17.8683	36.842	34.3	2.1	1	57	34	36842	319	159	accA	105	503	WP_006848585.1	447
206	24.1379	25.974	33.5	3	2	77	46	25974	319	74	accA	9	122	WP_023925338.1	46
207	24.1379	25.974	33.5	3	2	77	46	25974	319	74	accA	9	122	RKW57166.1	46
208	24.1379	25.974	33.5	3	2	77	46	25974	319	74	accA	9	122	WP_004362219.1	46
209	26.0188	28.916	32.7	4.4	3	83	47	28916	319	74	accA	3	122	WP_118354560.1	41
210	26.0188	28.916	32.7	5	3	83	47	28916	319	74	accA	3	122	MBD8938077.1	41
211	26.0188	28.916	32.7	5.1	3	83	47	28916	319	74	accA	3	122	WP_007899969.1	41
212	24.4514	28.205	32.7	5.5	3	78	43	28205	319	74	accA	9	122	WP_088437789.1	46
213	24.4514	28.205	32.7	5.5	3	78	43	28205	319	74	accA	9	122	WP_100022349.1	46
214	41.6928	27.068	32.3	6	6	133	75	27068	319	193	accA	73	228	WP_036856979.1	106
215	16.3009	28.846	32.7	6.2	0	52	37	28846	319	257	accA	206	308	WP_005845626.1	257
216	16.3009	28.846	32.7	6.2	0	52	37	28846	319	257	accA	206	308	WP_027952539.1	257
217	24.4514	28.205	32.3	6.2	3	78	43	28205	319	74	accA	9	122	WP_099983380.1	46
218	41.6928	27.068	32.3	6.3	6	133	75	27068	319	193	accA	73	228	WP_118867145.1	106
219	34.4828	25.455	32.3	6.4	4	110	65	25455	319	308	accA	210	203	WP_158463603.1	100
220	41.6928	27.068	32.3	6.4	6	133	75	27068	319	193	accA	73	228	WP_025068205.1	106
221	41.6928	27.068	32.3	6.4	6	133	75	27068	319	193	accA	73	228	WP_013671778.1	106
222	24.4514	28.205	32	7.7	3	78	43	28205	319	74	accA	9	122	WP_099976401.1	46
223	24.4514	28.205	32	7.7	3	78	43	28205	319	74	accA	9	122	WP_099995743.1	46
385	34.6154	51.852	57	1.05e-09	0	54	26	51852	156	156	accB	103	143	WP_005846140.1	90
386	67.3077	38.095	57	1.16e-09	3	105	55	38095	156	156	accB	52	144	WP_091819124.1	50
387	50	39.744	57	1.23e-09	1	78	40	39744	156	156	accB	79	144	WP_092071887.1	74
388	46.7949	45.205	57	1.34e-09	1	73	33	45205	156	155	accB	83	146	WP_094381398.1	81
389	50	42.308	56.6	1.5e-09	1	78	38	42308	156	156	accB	79	141	WP_172173802.1	71
390	56.4103	44.318	56.6	1.53e-09	3	88	39	44318	156	155	accB	68	149	WP_125104008.1	72
391	56.4103	44.318	56.6	1.54e-09	3	88	39	44318	156	155	accB	68	149	WP_053399231.1	72
392	60.8974	38.947	56.2	2e-09	2	95	50	38947	156	156	accB	62	142	WP_172275594.1	56
393	63.4615	40.404	58.5	2.17e-09	2	99	56	40404	156	155	accB	57	612	QIM10025.1	517
394	34.6154	50	56.2	2.23e-09	0	54	27	50000	156	156	accB	103	144	WP_036877127.1	91
395	48.0769	42.667	56.2	2.56e-09	2	75	34	42667	156	156	accB	83	148	CDE07527.1	82
396	49.359	40.26	56.2	2.86e-09	1	77	39	40260	156	155	accB	79	160	WP_118201030.1	91
397	49.359	44.156	55.8	3.23e-09	1	77	36	44156	156	155	accB	79	153	WP_153122843.1	84
398	49.359	41.558	55.8	3.9e-09	1	77	38	41558	156	155	accB	79	160	WP_118080759.1	91
399	42.9487	46.269	55.8	3.97e-09	2	67	29	46269	156	146	accB	80	141	WP_036913181.1	82
400	42.9487	46.269	55.8	3.97e-09	2	67	29	46269	156	146	accB	80	141	WP_091765967.1	82
401	34.6154	51.852	55.5	4e-09	0	54	26	51852	156	156	accB	103	141	CDB04494.1	88
402	34.6154	51.852	55.5	4.81e-09	0	54	26	51852	156	156	accB	103	158	MBD8971396.1	105
403	34.6154	51.852	55.5	4.86e-09	0	54	26	51852	156	156	accB	103	158	WP_118116966.1	105
404	34.6154	51.852	55.5	5.34e-09	0	54	26	51852	156	156	accB	103	158	WP_022111034.1	105
405	56.4103	39.773	55.1	5.89e-09	2	88	45	39773	156	156	accB	70	148	CCY66443.1	68
406	56.4103	43.182	55.1	5.91e-09	3	88	40	43182	156	155	accB	68	149	CCX68588.1	72
407	34.6154	51.852	55.1	6.31e-09	0	54	26	51852	156	156	accB	103	155	WP_117662070.1	102
408	34.6154	51.852	55.1	6.31e-09	0	54	26	51852	156	156	accB	103	155	WP_118312161.1	102
409	34.6154	51.852	55.1	6.31e-09	0	54	26	51852	156	156	accB	103	155	MBD9057561.1	102
410	49.359	40.26	55.5	6.76e-09	1	77	39	40260	156	155	accB	79	160	WP_154482998.1	91
411	49.359	40.26	55.5	6.76e-09	1	77	39	40260	156	155	accB	79	160	WP_006846470.1	91
412	34.6154	51.852	55.1	6.93e-09	0	54	26	51852	156	156	accB	103	155	CDD20284.1	102
413	34.6154	51.852	55.1	7.35e-09	0	54	26	51852	156	156	accB	103	156	MBD9259770.1	103
414	34.6154	50	54.7	7.45e-09	0	54	27	50000	156	156	accB	103	138	WP_104368889.1	85
415	63.4615	37.374	54.7	7.78e-09	2	99	50	37374	156	155	accB	62	148	WP_126677748.1	57
416	34.6154	51.852	55.1	8.01e-09	0	54	26	51852	156	156	accB	103	155	WP_089542763.1	102
417	47.4359	44.595	54.3	9.98e-09	1	74	34	44595	156	156	accB	83	142	WP_094385584.1	76
418	33.9744	49.057	54.7	1e-08	0	53	27	49057	156	155	accB	103	160	WP_117586355.1	108
419	49.359	41.558	54.7	1.14e-08	1	77	38	41558	156	155	accB	79	154	WP_117693723.1	85
420	49.359	41.558	54.3	1.2e-08	1	77	38	41558	156	155	accB	79	154	WP_119237578.1	85
421	33.9744	52.83	54.7	1.31e-08	0	53	25	52830	156	155	accB	103	164	CDC25822.1	112
422	51.9231	44.444	54.7	1.34e-08	2	81	38	44444	156	155	accB	75	164	MBD9072973.1	91
423	49.359	41.558	54.3	1.37e-08	1	77	38	41558	156	155	accB	79	154	WP_118153233.1	85
424	49.359	41.558	54.3	1.41e-08	1	77	38	41558	156	155	accB	79	160	MBD9058780.1	91
425	51.9231	44.444	54.3	1.88e-08	2	81	38	44444	156	155	accB	75	164	HCD64952.1	91
426	54.4872	38.824	53.9	1.91e-08	1	85	45	38824	156	155	accB	71	149	CCX67547.1	72
427	33.3333	50	53.5	2.1e-08	0	52	26	50000	156	156	accB	105	141	WP_004370324.1	90
428	49.359	41.558	53.9	2.15e-08	1	77	38	41558	156	155	accB	79	166	MBD9087262.1	97
429	33.3333	50	53.5	2.16e-08	0	52	26	50000	156	156	accB	105	141	WP_023983267.1	90
430	49.359	40.26	53.9	2.22e-08	1	77	39	40260	156	155	accB	79	160	WP_118415261.1	91
431	33.9744	49.057	53.9	2.34e-08	0	53	27	49057	156	155	accB	103	160	WP_153084424.1	108
432	33.9744	49.057	53.9	2.34e-08	0	53	27	49057	156	155	accB	103	160	WP_153086533.1	108
433	33.9744	49.057	53.9	2.46e-08	0	53	27	49057	156	155	accB	103	160	WP_153081550.1	108
434	33.9744	49.057	53.9	2.49e-08	0	53	27	49057	156	155	accB	103	160	WP_022121789.1	108
435	34.6154	50	53.5	2.55e-08	0	54	27	50000	156	156	accB	103	142	CCY01490.1	89
436	33.9744	49.057	53.5	3.09e-08	0	53	27	49057	156	155	accB	103	160	WP_118140290.1	108
437	33.9744	52.83	53.5	3.15e-08	0	53	25	52830	156	155	accB	103	164	MBD9260621.1	112
438	33.9744	52.83	53.5	3.32e-08	0	53	25	52830	156	155	accB	103	164	WP_158462770.1	112
439	33.9744	49.057	53.1	3.52e-08	0	53	27	49057	156	155	accB	103	154	WP_153118808.1	102
440	32.6923	50.98	53.1	3.59e-08	0	51	25	50980	156	156	accB	106	142	WP_028913291.1	92
441	33.9744	49.057	53.1	4.25e-08	0	53	27	49057	156	155	accB	103	160	WP_153088366.1	108
442	40.3846	44.444	52.8	5.31e-08	1	63	28	44444	156	141	accB	79	136	WP_094436443.1	81
443	40.3846	44.444	52.8	5.31e-08	1	63	28	44444	156	141	accB	79	136	WP_094390084.1	81
444	62.8205	35.714	52.4	6.45e-08	2	98	51	35714	156	155	accB	58	148	QJR97968.1	63
445	33.9744	47.17	52.4	7.72e-08	0	53	28	47170	156	155	accB	103	160	QNT65979.1	108
446	81.4103	30.709	52	8.67e-08	4	127	70	30709	156	156	accB	39	142	WP_036912324.1	25
447	34.6154	50	52	9.45e-08	0	54	27	50000	156	156	accB	103	144	CDE40955.1	91
448	81.4103	29.921	51.6	1.28e-07	4	127	71	29921	156	156	accB	39	142	WP_103915873.1	25
449	88.4615	31.884	51.2	1.58e-07	3	138	77	31884	156	155	accB	18	144	WP_172181176.1	24
450	41.0256	46.875	51.2	1.85e-07	2	64	27	46875	156	146	accB	83	145	WP_027450556.1	89
451	42.3077	43.939	50.4	2.68e-07	1	66	35	43939	156	156	accB	93	142	WP_073210218.1	77
452	32.6923	50.98	50.4	2.91e-07	0	51	25	50980	156	156	accB	106	142	WP_028903586.1	92
453	32.6923	49.02	50.4	2.94e-07	0	51	26	49020	156	156	accB	106	142	WP_091841889.1	92
454	32.6923	49.02	50.8	3.05e-07	0	51	26	49020	156	156	accB	106	156	ADE83630.1	106
455	32.6923	49.02	50.4	3.09e-07	0	51	26	49020	156	156	accB	106	142	WP_028908504.1	92
456	32.6923	47.059	50.4	3.25e-07	0	51	27	47059	156	156	accB	106	143	WP_091899546.1	93
457	102.564	30.625	50.4	3.77e-07	5	160	82	30625	156	155	accB	1	150	WP_091823469.1	15
458	38.4615	43.333	50.1	4.97e-07	1	60	32	43333	156	146	accB	89	145	WP_091815863.1	86
459	46.7949	43.836	50.1	5.18e-07	2	73	34	43836	156	155	accB	83	148	CCY80371.1	83
460	43.5897	41.176	49.7	6.73e-07	2	68	33	41176	156	146	accB	79	140	WP_073043905.1	80
461	43.5897	41.176	49.7	7.08e-07	2	68	33	41176	156	146	accB	79	140	WP_074761489.1	80
462	43.5897	41.176	49.7	7.08e-07	2	68	33	41176	156	146	accB	79	140	WP_013063260.1	80
463	43.5897	41.176	49.3	8.43e-07	2	68	33	41176	156	146	accB	79	140	WP_074832883.1	80
464	43.5897	41.176	49.3	9.16e-07	2	68	33	41176	156	146	accB	79	140	WP_033149803.1	80
465	39.1026	42.623	49.3	9.63e-07	0	61	35	42623	156	155	accB	95	151	WP_022317253.1	91
466	28.2051	52.273	49.3	9.89e-07	0	44	21	52273	156	146	accB	103	141	WP_091843958.1	98
467	43.5897	39.706	49.3	1.05e-06	1	68	34	39706	156	146	accB	79	141	WP_092067916.1	81
468	43.5897	41.176	48.5	1.86e-06	1	68	33	41176	156	146	accB	79	138	WP_036877865.1	78
469	43.5897	41.176	48.1	2.28e-06	2	68	33	41176	156	146	accB	79	140	WP_028903111.1	80
470	43.5897	38.235	46.6	9.13e-06	2	68	35	38235	156	146	accB	79	140	WP_028911782.1	80
471	43.5897	39.706	46.6	1.07e-05	2	68	34	39706	156	146	accB	79	140	WP_091899792.1	80
472	51.2821	38.75	46.2	1.23e-05	1	80	42	38750	156	155	accB	76	149	WP_092111458.1	77
473	53.8462	39.286	46.2	1.4e-05	1	84	44	39286	156	155	accB	72	149	WP_107620031.1	73
474	94.2308	32.653	45.8	1.89e-05	6	147	76	32653	156	146	accB	1	139	WP_006948406.1	15
475	35.2564	50.909	45.4	2.27e-05	1	55	21	50909	156	156	accB	108	141	WP_007896898.1	87
476	46.7949	35.616	45.1	3.11e-05	1	73	40	35616	156	155	accB	83	151	WP_104405401.1	86
477	50.641	35.443	46.2	3.79e-05	1	79	44	35443	156	156	accB	78	622	CDE40698.1	551
478	33.9744	45.283	44.7	4.15e-05	0	53	29	45283	156	155	accB	103	150	WP_172345508.1	98
479	39.1026	40.984	44.3	7.41e-05	0	61	36	40984	156	155	accB	95	151	MBD9028005.1	91
480	39.1026	40.984	44.3	7.41e-05	0	61	36	40984	156	155	accB	95	151	MBD9036263.1	91
481	43.5897	38.235	44.3	7.44e-05	2	68	35	38235	156	146	accB	79	140	WP_073208944.1	80
482	47.4359	35.135	43.9	9.84e-05	1	74	46	35135	156	155	accB	84	152	CDE85855.1	79
483	32.6923	39.216	44.7	0.000133	0	51	31	39216	156	156	accB	106	675	CDE08442.1	625
484	32.6923	39.216	41.2	0.002	0	51	31	39216	156	156	accB	106	602	CDE08442.1	552
485	55.7692	34.483	43.1	0.000152	2	87	49	34483	156	156	accB	70	143	CCX44664.1	65
486	54.4872	36.471	42.7	0.000226	2	85	45	36471	156	156	accB	72	143	CDE58245.1	68
487	28.2051	47.727	42.7	0.000272	0	44	23	47727	156	146	accB	103	144	CCY15920.1	101
488	33.9744	43.396	42	0.000401	0	53	30	43396	156	155	accB	103	151	CDF22242.1	99
489	34.6154	38.889	42	0.000601	0	54	33	38889	156	156	accB	103	164	CCY64885.1	111
490	47.4359	33.784	40.8	0.001	1	74	42	33784	156	156	accB	83	138	WP_172180624.1	72
491	25.641	45	37	0.004	0	40	22	45000	156	156	accB	117	41	CCX43429.1	2
492	34.6154	35.185	38.1	0.014	0	54	35	35185	156	156	accB	103	164	CCY80815.1	111
493	47.4359	36.486	36.6	0.042	2	74	28	36486	156	146	accB	79	141	WP_091964147.1	81
494	54.4872	34.118	35.8	0.072	3	85	35	34118	156	146	accB	68	140	WP_029903963.1	71
495	88.4615	21.014	35	0.26	3	138	96	21014	156	134	accB	3	367	MBD9027067.1	237
496	63.4615	29.293	30.4	8.8	4	99	66	29293	156	115	accB	18	122	CCY03365.1	27
497	63.4615	28.283	30	8.9	3	99	55	28283	156	143	accB	59	202	WP_004356833.1	106
498	42.8571	38.889	37	0.025	0	54	33	38889	126	72	acpS	19	158	WP_172178229.1	105
499	56.3492	30.986	32.3	0.84	1	71	48	30986	126	72	acpS	2	158	WP_092069308.1	89
500	54.7619	27.536	32	1.5	2	69	47	27536	126	116	acpS	50	68	CDC24097.1	1
501	54.7619	27.536	31.6	1.6	2	69	47	27536	126	116	acpS	50	68	MBD9073795.1	1
502	38.0952	33.333	31.6	1.7	0	48	32	33333	126	72	acpS	25	158	WP_091901255.1	111
503	38.0952	33.333	31.2	2	0	48	32	33333	126	72	acpS	25	158	WP_091915660.1	111
504	43.6508	27.273	29.6	5.2	1	55	35	27273	126	70	acpS	16	68	WP_172276003.1	19
505	41.2698	32.692	30	6.1	0	52	35	32692	126	72	acpS	21	159	WP_094379738.1	108
506	34.127	30.233	30.4	6.2	0	43	30	30233	126	49	acpS	7	413	WP_107581534.1	371
507	34.127	30.233	30	6.6	0	43	30	30233	126	49	acpS	7	413	WP_025880944.1	371
508	34.127	30.233	30	6.6	0	43	30	30233	126	49	acpS	7	413	WP_021588685.1	371
509	81.746	24.272	30	6.6	3	103	54	24272	126	86	acpS	8	133	WP_004355614.1	31
510	44.4444	28.571	29.6	8.9	1	56	39	28571	126	124	acpS	70	152	HCD76804.1	97
511	26.9841	41.176	28.9	9.5	1	34	16	41176	126	49	acpS	16	42	WP_091822906.1	13
741	38.6921	29.577	55.1	5.64e-08	3	142	81	29577	367	356	asd	222	130	CDD18892.1	1
742	36.7847	29.63	53.1	3.25e-07	3	135	90	29630	367	356	asd	222	130	CUP13713.1	1
743	37.8747	28.777	50.4	2.84e-06	3	139	94	28777	367	356	asd	218	134	MBB1551236.1	1
744	36.2398	26.316	38.1	0.044	3	133	79	26316	367	356	asd	231	121	HAT61432.1	1
745	22.6158	27.711	35.4	1.1	1	83	53	27711	367	337	asd	262	378	WP_025000212.1	296
746	8.71935	40.625	33.9	2.5	0	32	19	40625	367	125	asd	94	288	WP_021588451.1	257
747	8.71935	40.625	33.9	2.6	0	32	19	40625	367	125	asd	94	288	WP_107581503.1	257
748	8.71935	40.625	33.9	2.8	0	32	19	40625	367	125	asd	94	288	WP_027444677.1	257
749	21.2534	26.923	33.5	4	1	78	50	26923	367	337	asd	267	365	PIN29412.1	288
750	21.2534	26.923	33.5	4.6	1	78	50	26923	367	337	asd	267	378	WP_180946431.1	301
751	22.6158	30.12	32.7	5.6	3	83	48	30120	367	79	asd	1	77	WP_028909067.1	1
752	22.3433	30.488	33.1	6.2	3	82	44	30488	367	210	asd	134	234	RGX93958.1	161
753	22.3433	30.488	33.1	6.4	3	82	44	30488	367	210	asd	134	234	WP_118080380.1	161
754	22.3433	30.488	33.1	6.6	3	82	44	30488	367	210	asd	134	234	WP_153092265.1	161
755	22.3433	30.488	33.1	6.7	3	82	44	30488	367	210	asd	134	234	WP_118190771.1	161
756	22.3433	30.488	33.1	6.8	3	82	44	30488	367	210	asd	134	234	WP_006846677.1	161
757	13.3515	32.653	32.3	7.5	2	49	30	32653	367	101	asd	56	142	WP_107620491.1	94
758	47.4114	25.287	32.7	8	9	174	79	25287	367	215	asd	83	248	WP_080728506.1	85
759	47.4114	25.287	32.7	8.4	9	174	79	25287	367	215	asd	83	248	WP_084793477.1	85
760	23.1608	27.059	32.3	8.5	1	85	55	27059	367	344	asd	267	372	WP_118866585.1	288
761	100	24.082	52.4	1.09e-06	6	245	162	24082	245	233	bamD	3	251	SEE10598.1	17
762	100	24.082	51.2	2.78e-06	6	245	162	24082	245	233	bamD	3	251	SEV86542.1	17
763	97.9592	23.333	50.8	3.12e-06	5	240	161	23333	245	233	bamD	7	234	WP_091899645.1	5
764	97.9592	23.333	50.1	6.84e-06	5	240	161	23333	245	233	bamD	7	234	WP_091914598.1	5
765	98.7755	23.554	49.7	8.39e-06	5	242	162	23554	245	233	bamD	5	234	WP_028903869.1	3
766	100.816	25.911	49.7	8.7e-06	8	247	157	25911	245	236	bamD	5	238	WP_100370289.1	3
767	100.816	25.911	49.7	8.7e-06	8	247	157	25911	245	236	bamD	5	238	WP_100370289.1	3
768	100.816	25.911	49.7	8.95e-06	8	247	157	25911	245	236	bamD	5	238	WP_100190110.1	3
769	100.816	25.911	49.3	1.08e-05	8	247	157	25911	245	236	bamD	5	238	WP_014710019.1	3
770	100.816	25.101	49.3	1.2e-05	8	247	160	25101	245	237	bamD	5	238	WP_007367337.1	3
771	100.816	25.911	48.5	1.73e-05	8	247	157	25911	245	236	bamD	5	238	WP_100022414.1	3
772	100.816	25.506	48.5	2.14e-05	8	247	158	25506	245	236	bamD	5	238	WP_100014273.1	3
773	100.816	25.506	48.5	2.14e-05	8	247	158	25506	245	236	bamD	5	238	WP_097656266.1	3
774	100.816	25.911	48.1	2.83e-05	8	247	157	25911	245	236	bamD	5	238	WP_045167711.1	3
775	100.816	25.506	47.8	3.25e-05	8	247	158	25506	245	236	bamD	5	238	WP_061868085.1	3
776	100.816	25.506	47.8	3.77e-05	8	247	158	25506	245	236	bamD	5	238	WP_028904659.1	3
777	100.408	21.545	47	6.96e-05	5	246	168	21545	245	236	bamD	5	237	WP_103003351.1	3
778	98.7755	23.14	47	7.16e-05	5	242	163	23140	245	233	bamD	5	234	WP_028912482.1	3
779	100.816	25.101	46.6	8.28e-05	8	247	159	25101	245	236	bamD	5	238	WP_099836236.1	3
780	100.816	25.506	46.2	0.000103	8	247	158	25506	245	236	bamD	5	238	WP_099891324.1	3
781	100.816	25.506	46.2	0.000106	8	247	158	25506	245	236	bamD	5	238	WP_097549587.1	3
782	100.816	25.101	46.2	0.000117	8	247	159	25101	245	236	bamD	5	238	WP_097648546.1	3
783	100.408	22.358	46.2	0.000138	7	246	166	22358	245	236	bamD	5	237	WP_153096525.1	3
784	100.408	21.138	45.8	0.000149	5	246	169	21138	245	236	bamD	5	237	WP_036927185.1	3
785	100.408	21.138	45.8	0.000161	5	246	169	21138	245	236	bamD	5	237	WP_102188008.1	3
786	100.408	22.358	45.8	0.000169	7	246	166	22358	245	236	bamD	5	237	MBD8994237.1	3
787	100.408	22.358	45.8	0.000169	7	246	166	22358	245	236	bamD	5	237	WP_117663401.1	3
788	100.408	21.138	45.4	0.000199	5	246	169	21138	245	236	bamD	5	237	WP_008121779.1	3
789	66.1224	27.16	45.4	0.00021	6	162	97	27160	245	237	bamD	89	238	WP_036875953.1	85
790	66.1224	27.16	45.4	0.000213	6	162	97	27160	245	237	bamD	89	254	EGC87482.1	101
791	100	22.041	45.4	0.000214	6	245	166	22041	245	237	bamD	7	238	WP_009235608.1	5
792	100	22.041	45.4	0.000214	6	245	166	22041	245	237	bamD	7	238	WP_009235608.1	5
793	100	22.449	45.4	0.00022	6	245	165	22449	245	237	bamD	7	238	WP_019187998.1	5
794	100.816	23.077	45.4	0.000225	5	247	166	23077	245	236	bamD	3	240	WP_019967179.1	5
795	98.7755	23.554	45.4	0.000225	5	242	162	23554	245	233	bamD	5	234	WP_028908011.1	3
796	98.7755	23.554	45.4	0.000225	5	242	162	23554	245	233	bamD	5	234	WP_013063050.1	3
797	98.7755	23.554	45.4	0.000231	5	242	162	23554	245	233	bamD	5	234	WP_074762258.1	3
798	100.408	22.358	45.4	0.000239	7	246	166	22358	245	236	bamD	5	237	WP_089543367.1	3
799	97.551	25.523	45.1	0.000244	8	239	152	25523	245	236	bamD	13	238	WP_024999322.1	11
800	100	22.449	45.1	0.000262	6	245	165	22449	245	237	bamD	7	238	WP_044077595.1	5
801	66.1224	27.16	45.1	0.00029	6	162	97	27160	245	237	bamD	89	238	WP_029216366.1	85
802	98.7755	23.14	45.1	0.000303	5	242	163	23140	245	233	bamD	5	250	SEM66962.1	19
803	66.1224	27.16	45.1	0.000305	6	162	97	27160	245	237	bamD	89	254	AEA20410.1	101
804	98.7755	23.14	45.1	0.000311	5	242	163	23140	245	233	bamD	5	234	WP_091840312.1	3
805	98.7755	22.727	44.7	0.000353	5	242	164	22727	245	233	bamD	5	234	WP_091765781.1	3
806	100.816	23.077	44.7	0.000356	5	247	166	23077	245	236	bamD	3	240	WP_081475801.1	5
807	66.1224	27.16	44.7	0.000362	6	162	97	27160	245	237	bamD	89	238	WP_036854755.1	85
808	100.816	23.077	44.7	0.000369	5	247	166	23077	245	236	bamD	3	237	EHO73746.1	2
809	100.816	23.887	44.3	0.000456	8	247	163	23887	245	237	bamD	5	238	WP_025078736.1	3
810	100.408	21.951	44.3	0.00049	6	246	165	21951	245	237	bamD	7	238	WP_025817125.1	5
811	100	22.041	44.3	0.000502	6	245	166	22041	245	237	bamD	7	234	EFC68996.1	1
812	98.7755	23.554	44.3	0.00054	5	242	162	23554	245	233	bamD	5	234	WP_073210846.1	3
813	99.1837	23.045	44.3	0.000592	7	243	162	23045	245	236	bamD	8	237	WP_004379378.1	6
814	87.3469	22.43	43.9	0.000648	4	214	142	22430	245	206	bamD	6	217	ERT59925.1	15
815	100	21.633	43.9	0.000658	6	245	167	21633	245	237	bamD	7	238	WP_018966501.1	5
816	87.3469	22.43	43.9	0.000671	4	214	142	22430	245	206	bamD	6	207	WP_036871646.1	5
817	98.7755	22.314	43.9	0.000685	5	242	165	22314	245	233	bamD	5	234	WP_036912928.1	3
818	100	22.041	43.9	0.000702	6	245	166	22041	245	237	bamD	7	238	RKW57702.1	5
819	98.7755	23.14	43.9	0.000711	5	242	163	23140	245	233	bamD	5	234	WP_073043324.1	3
820	87.3469	22.43	43.9	0.000729	4	214	142	22430	245	206	bamD	6	207	WP_036879303.1	5
821	94.6939	23.276	43.5	0.000863	6	232	155	23276	245	236	bamD	18	237	HBN47039.1	16
822	98.7755	22.314	43.5	0.001	7	242	163	22314	245	234	bamD	7	235	WP_036877389.1	5
823	100	21.633	43.1	0.001	6	245	149	21633	245	233	bamD	12	234	WP_094390269.1	10
824	100.408	21.951	43.1	0.001	7	246	167	21951	245	236	bamD	5	237	WP_118311084.1	3
825	98.7755	23.14	43.1	0.001	6	242	158	23140	245	234	bamD	7	236	WP_094383326.1	9
826	98.7755	23.14	43.1	0.001	6	242	158	23140	245	234	bamD	7	236	WP_094383326.1	9
827	87.3469	21.963	43.1	0.001	4	214	143	21963	245	206	bamD	6	209	EFA91941.1	7
828	87.3469	21.963	42.7	0.002	4	214	143	21963	245	206	bamD	6	207	WP_040562799.1	5
829	100	21.224	42.4	0.002	6	245	170	21224	245	236	bamD	5	237	MBD9015304.1	3
830	98.7755	22.314	42.4	0.002	5	242	165	22314	245	233	bamD	5	234	WP_103915484.1	3
831	100	22.449	42.4	0.002	5	245	167	22449	245	236	bamD	5	237	WP_028901679.1	3
832	104.49	22.656	42.4	0.002	7	256	158	22656	245	237	bamD	4	277	EGQ11975.1	40
833	104.49	22.656	42	0.003	7	256	158	22656	245	237	bamD	4	238	WP_044127150.1	1
834	96.3265	22.881	42	0.003	5	236	159	22881	245	237	bamD	15	238	WP_004361514.1	13
835	104.49	22.656	42	0.003	7	256	158	22656	245	237	bamD	4	238	WP_027951958.1	1
836	104.49	22.656	42	0.003	7	256	158	22656	245	237	bamD	4	254	AGB29555.1	17
837	100.408	23.171	41.6	0.004	7	246	166	23171	245	237	bamD	5	254	BBA29677.1	19
838	101.224	22.581	41.6	0.004	7	248	168	22581	245	237	bamD	4	238	WP_125233547.1	1
839	65.7143	26.087	41.6	0.004	6	161	98	26087	245	236	bamD	89	237	WP_028898039.1	85
840	100.408	20.732	41.6	0.004	5	246	170	20732	245	236	bamD	5	237	WP_153090187.1	3
841	87.3469	22.43	41.6	0.004	4	214	144	22430	245	237	bamD	36	254	CCZ12849.1	51
842	100.408	23.171	41.2	0.005	7	246	166	23171	245	237	bamD	5	238	WP_120174829.1	3
843	97.9592	24.167	41.2	0.005	8	240	156	24167	245	236	bamD	12	238	WP_130829238.1	10
844	65.7143	24.224	41.2	0.005	3	161	103	24224	245	237	bamD	89	238	WP_107624318.1	85
845	100.408	22.358	41.2	0.005	5	246	168	22358	245	237	bamD	5	238	WP_036921084.1	3
846	87.3469	21.495	41.2	0.005	4	214	144	21495	245	206	bamD	6	207	WP_102697318.1	5
847	100.408	22.358	41.2	0.006	5	246	168	22358	245	237	bamD	5	238	WP_013265044.1	3
848	65.7143	24.224	40.8	0.007	3	161	103	24224	245	237	bamD	89	238	WP_042856469.1	85
849	101.224	21.774	40.8	0.007	7	248	168	21774	245	236	bamD	4	237	WP_025066377.1	1
850	71.4286	21.714	40.8	0.007	4	175	111	21714	245	236	bamD	78	241	HCC87707.1	77
851	65.7143	24.845	40.8	0.007	5	161	102	24845	245	237	bamD	89	254	EGW49074.1	101
852	45.3061	26.126	40.8	0.008	2	111	70	26126	245	234	bamD	136	242	SFF94212.1	132
853	100.408	22.358	40.8	0.008	5	246	168	22358	245	237	bamD	5	238	WP_036865922.1	3
854	45.3061	26.126	40.8	0.008	2	111	70	26126	245	234	bamD	136	235	WP_092110127.1	125
855	48.5714	29.412	40.4	0.009	4	119	67	29412	245	236	bamD	132	238	WP_006045061.1	123
856	98.7755	25.207	40.4	0.009	9	242	153	25207	245	237	bamD	12	239	WP_025001502.1	10
857	48.5714	29.412	40.4	0.01	4	119	67	29412	245	236	bamD	132	238	WP_115083162.1	123
858	100.408	20.325	40.4	0.011	5	246	171	20325	245	236	bamD	5	237	WP_007174313.1	3
859	48.5714	27.731	40.4	0.011	4	119	69	27731	245	236	bamD	132	248	EFL45450.1	133
860	48.5714	27.731	40	0.011	4	119	69	27731	245	236	bamD	132	238	WP_025064413.1	123
861	100.408	21.951	40	0.011	5	246	169	21951	245	237	bamD	5	238	WP_021672884.1	3
862	100.408	22.358	40	0.012	7	246	163	22358	245	236	bamD	6	237	WP_052053052.1	5
863	97.1429	21.008	40	0.012	5	238	165	21008	245	237	bamD	13	239	WP_021993347.1	12
864	101.224	24.597	40	0.013	9	248	159	24597	245	236	bamD	5	238	RKW51768.1	3
865	101.224	24.597	40	0.014	9	248	159	24597	245	236	bamD	5	238	WP_004362151.1	3
866	96.7347	21.941	40	0.014	4	237	160	21941	245	233	bamD	11	237	WP_027455970.1	12
867	96.7347	21.097	40	0.014	4	237	162	21097	245	233	bamD	11	237	WP_027450539.1	12
868	65.7143	24.845	39.7	0.017	5	161	100	24845	245	236	bamD	89	253	EHG16668.1	101
869	65.7143	24.845	39.7	0.018	5	161	100	24845	245	236	bamD	89	237	WP_025790949.1	85
870	95.9184	22.979	39.7	0.019	5	235	158	22979	245	236	bamD	15	237	WP_025838699.1	13
871	95.9184	22.979	39.7	0.019	5	235	158	22979	245	236	bamD	15	237	WP_025838699.1	13
872	65.7143	24.845	39.7	0.019	5	161	100	24845	245	236	bamD	89	237	WP_036869802.1	85
873	66.1224	25.926	39.3	0.021	6	162	99	25926	245	237	bamD	89	238	WP_077197467.1	85
874	46.1224	24.779	39.3	0.023	2	113	73	24779	245	236	bamD	136	239	WP_018361770.1	127
875	97.1429	20.588	39.3	0.023	5	238	166	20588	245	237	bamD	13	239	OKZ28442.1	12
876	100.816	22.672	39.3	0.025	8	247	164	22672	245	236	bamD	5	237	WP_022253312.1	3
877	45.3061	25.225	38.9	0.028	2	111	71	25225	245	234	bamD	136	235	WP_107621730.1	125
878	41.2245	24.752	38.9	0.034	2	101	66	24752	245	233	bamD	143	232	CDE87287.1	132
879	57.551	24.113	38.5	0.037	3	141	88	24113	245	218	bamD	89	217	MBD9028229.1	85
880	45.3061	26.126	38.5	0.038	2	111	70	26126	245	234	bamD	136	235	MBA7488672.1	125
881	41.2245	22.772	38.5	0.042	2	101	68	22772	245	233	bamD	143	269	CDA44332.1	169
882	100	20	38.5	0.043	5	245	173	20000	245	236	bamD	5	237	MBD9298542.1	3
883	86.9388	22.535	38.1	0.049	5	213	143	22535	245	236	bamD	36	237	WP_028900378.1	35
884	100.816	22.672	38.1	0.054	8	247	164	22672	245	236	bamD	5	237	MBD9073980.1	3
885	100.816	22.672	38.1	0.062	8	247	164	22672	245	236	bamD	5	237	HCD65795.1	3
886	100.408	21.951	38.1	0.062	7	246	167	21951	245	236	bamD	5	237	MBD9087736.1	3
887	38.3673	27.66	38.1	0.063	1	94	57	27660	245	218	bamD	136	219	CDF21902.1	126
888	100.408	21.951	38.1	0.065	7	246	167	21951	245	236	bamD	5	237	MBD9060236.1	3
889	103.265	21.344	38.1	0.066	8	253	160	21344	245	236	bamD	5	253	CDC97250.1	19
890	45.3061	27.928	37.7	0.079	3	111	65	27928	245	237	bamD	139	238	HCJ46217.1	131
891	103.265	21.344	37.7	0.079	8	253	160	21344	245	236	bamD	5	237	WP_094386220.1	3
892	99.1837	19.753	37.4	0.097	5	243	172	19753	245	234	bamD	5	235	MBB1537779.1	3
893	100.408	21.951	37.4	0.1	6	246	156	21951	245	233	bamD	6	234	CCY16050.1	7
894	99.1837	20.988	37.4	0.1	6	243	167	20988	245	236	bamD	8	237	WP_004342823.1	6
895	99.1837	19.753	37.4	0.11	5	243	172	19753	245	234	bamD	5	235	MBB1530042.1	3
896	102.449	22.709	37.4	0.11	8	251	168	22709	245	236	bamD	1	240	CDA66528.1	1
897	100.408	21.951	37.4	0.11	7	246	167	21951	245	236	bamD	5	237	WP_153073546.1	3
898	100.408	21.951	37.4	0.12	7	246	167	21951	245	236	bamD	5	237	WP_118080054.1	3
899	102.449	22.709	37	0.12	8	251	168	22709	245	236	bamD	1	240	EFB34189.1	1
900	100.408	21.951	37	0.12	7	246	167	21951	245	236	bamD	5	237	WP_118064491.1	3
901	100	21.633	37	0.13	6	245	169	21633	245	236	bamD	5	237	WP_172204813.1	3
902	100.408	21.951	37	0.13	7	246	167	21951	245	236	bamD	5	237	WP_117693762.1	3
903	100.408	21.951	37	0.13	7	246	167	21951	245	236	bamD	5	237	WP_118200445.1	3
904	100.408	21.951	37	0.13	7	246	167	21951	245	236	bamD	5	237	WP_118253384.1	3
905	100.408	21.951	37	0.14	7	246	167	21951	245	236	bamD	5	237	WP_040553712.1	3
906	102.041	20.8	37	0.14	6	250	171	20800	245	236	bamD	1	237	WP_036891566.1	1
907	32.6531	32.5	37.4	0.15	2	80	49	32500	245	115	bamD	37	698	EFC69878.1	623
908	100.408	21.951	37	0.15	7	246	167	21951	245	236	bamD	5	237	WP_117586755.1	3
909	87.7551	23.256	36.6	0.16	6	215	141	23256	245	206	bamD	5	206	MQO99400.1	3
910	87.7551	23.256	36.6	0.16	6	215	141	23256	245	206	bamD	5	206	MQO99400.1	3
911	88.1633	20.37	36.6	0.16	4	216	148	20370	245	237	bamD	36	240	WP_007576163.1	35
912	102.857	19.444	36.6	0.16	6	252	176	19444	245	237	bamD	2	254	EKY03891.1	14
913	32.6531	32.5	37.4	0.16	2	80	49	32500	245	115	bamD	37	708	WP_044259646.1	633
914	32.6531	32.5	37.4	0.16	2	80	49	32500	245	115	bamD	37	708	RKW62655.1	633
915	32.6531	32.5	37.4	0.16	2	80	49	32500	245	115	bamD	37	708	WP_044077771.1	633
916	32.6531	32.5	37	0.16	2	80	49	32500	245	115	bamD	37	708	WP_009161548.1	633
917	32.6531	32.5	37	0.18	2	80	49	32500	245	115	bamD	37	707	WP_025799556.1	632
918	34.2857	34.524	37	0.18	4	84	42	34524	245	94	bamD	24	346	WP_007574446.1	263
919	36.3265	26.966	35.8	0.19	2	89	57	26966	245	92	bamD	4	95	CDE34630.1	15
920	29.7959	32.877	37	0.19	2	73	37	32877	245	107	bamD	39	697	WP_025876785.1	633
921	37.9592	30.108	36.2	0.21	3	93	59	30108	245	245	bamD	153	168	WP_153080332.1	82
922	90.2041	22.624	36.2	0.22	3	221	149	22624	245	213	bamD	5	213	WP_018463316.1	3
923	37.9592	30.108	35.8	0.24	3	93	59	30108	245	245	bamD	153	168	WP_118081489.1	82
924	98.3673	20.332	36.2	0.24	7	241	168	20332	245	234	bamD	7	235	CCY81794.1	6
925	99.1837	20.576	36.2	0.24	5	243	168	20576	245	231	bamD	1	230	WP_104404038.1	1
926	37.9592	30.108	35.8	0.25	3	93	59	30108	245	245	bamD	153	168	MQO98936.1	82
927	102.449	19.522	36.2	0.26	7	251	174	19522	245	237	bamD	3	240	WP_025797394.1	2
928	29.7959	32.877	36.6	0.28	2	73	37	32877	245	107	bamD	39	699	KXA36887.1	635
929	100	21.633	35.8	0.28	6	245	169	21633	245	236	bamD	5	237	WP_104369069.1	3
930	29.7959	32.877	36.6	0.29	2	73	37	32877	245	107	bamD	39	697	WP_060940959.1	633
931	103.265	20.553	35.8	0.32	6	253	162	20553	245	236	bamD	5	237	WP_021583664.1	3
932	100.816	21.862	35.8	0.33	7	247	168	21862	245	237	bamD	5	265	WP_004337877.1	30
933	48.5714	25.21	35.8	0.35	4	119	73	25210	245	237	bamD	132	265	WP_155273674.1	150
934	44.898	23.636	35.8	0.36	2	110	72	23636	245	233	bamD	136	239	WP_028910209.1	130
935	37.9592	30.108	35.4	0.37	3	93	59	30108	245	245	bamD	153	168	RHK08050.1	82
936	37.9592	30.108	35.4	0.37	3	93	59	30108	245	245	bamD	153	168	WP_117695380.1	82
937	28.9796	32.394	35.8	0.43	2	71	36	32394	245	105	bamD	39	695	WP_130828792.1	633
938	48.5714	25.21	35.4	0.43	4	119	73	25210	245	237	bamD	132	273	WP_081942261.1	158
939	102.041	22	35.4	0.43	8	250	158	22000	245	233	bamD	4	233	WP_172179279.1	1
940	100.816	21.862	35.4	0.44	7	247	168	21862	245	237	bamD	5	238	WP_036863082.1	3
941	101.224	20.161	35	0.48	6	248	169	20161	245	236	bamD	5	237	WP_172273408.1	3
942	87.3469	22.897	35.4	0.49	4	214	141	22897	245	236	bamD	36	237	ERK00781.1	35
943	86.9388	23.005	35.4	0.49	4	213	142	23005	245	236	bamD	36	240	WP_036906846.1	38
944	48.5714	25.21	35.4	0.51	4	119	73	25210	245	237	bamD	132	273	WP_008449248.1	158
945	48.5714	25.21	35.4	0.51	4	119	73	25210	245	237	bamD	132	273	WP_019035588.1	158
946	36.3265	25.843	34.3	0.52	2	89	58	25843	245	92	bamD	4	81	WP_118356170.1	1
947	32.6531	31.25	35.4	0.52	2	80	50	31250	245	115	bamD	37	708	WP_070720288.1	633
948	31.4286	25.974	34.3	0.53	2	77	54	25974	245	83	bamD	7	75	CDE41340.1	2
949	36.3265	25.843	34.3	0.54	2	89	58	25843	245	92	bamD	4	81	WP_007901945.1	1
950	43.6735	25.234	35	0.56	3	107	66	25234	245	236	bamD	143	237	WP_022109792.1	132
951	100.816	23.077	35	0.57	7	247	165	23077	245	236	bamD	4	237	MBD9042102.1	2
952	48.5714	25.21	35	0.59	4	119	73	25210	245	237	bamD	132	238	WP_024992626.1	123
953	48.5714	25.21	35	0.6	4	119	73	25210	245	237	bamD	132	238	KGF22764.1	123
954	36.3265	25.843	33.9	0.63	2	89	58	25843	245	92	bamD	4	81	HAH76856.1	1
955	87.3469	23.364	34.7	0.72	6	214	140	23364	245	236	bamD	36	237	HAE06687.1	35
956	101.224	19.758	34.7	0.79	6	248	173	19758	245	234	bamD	1	236	WP_094382097.1	1
957	48.1633	24.576	34.7	0.85	4	118	73	24576	245	236	bamD	132	238	WP_024990505.1	124
958	48.1633	24.576	34.7	0.85	4	118	73	24576	245	236	bamD	132	238	WP_024990505.1	124
959	32.6531	30	35	0.86	2	80	51	30000	245	115	bamD	37	706	WP_025816374.1	631
960	100.408	21.951	34.3	0.87	7	246	167	21951	245	236	bamD	5	237	CDA96277.1	3
961	100.408	21.951	34.3	0.87	7	246	167	21951	245	236	bamD	5	237	CDA96277.1	3
962	46.5306	25.439	34.3	1	2	114	71	25439	245	233	bamD	132	234	WP_091958887.1	123
963	101.633	20.08	34.3	1.1	6	249	174	20080	245	236	bamD	1	244	PVX53534.1	8
964	101.633	20.08	33.9	1.2	6	249	174	20080	245	236	bamD	1	237	WP_116616618.1	1
965	101.224	22.177	33.9	1.2	8	248	169	22177	245	237	bamD	4	238	WP_106812719.1	1
966	44.898	24.545	33.9	1.3	3	110	68	24545	245	237	bamD	140	237	WP_006951668.1	131
967	87.3469	22.897	33.9	1.5	4	214	141	22897	245	236	bamD	36	237	WP_187116442.1	35
968	43.6735	24.299	33.9	1.5	3	107	67	24299	245	236	bamD	143	237	MBD9272363.1	132
969	100.408	21.545	33.5	1.6	7	246	168	21545	245	236	bamD	5	237	CDB05512.1	3
970	86.9388	23.005	33.5	1.6	4	213	142	23005	245	236	bamD	36	240	WP_007133427.1	38
971	76.3265	22.46	33.5	1.6	4	187	134	22460	245	193	bamD	8	182	WP_091818541.1	6
972	12.2449	43.333	33.9	1.6	0	30	17	43333	245	30	bamD	1	30	WP_023057931.1	1
973	32.2449	30.38	33.9	1.7	2	79	50	30380	245	115	bamD	38	708	WP_018967769.1	634
974	101.224	19.758	33.5	1.8	6	248	173	19758	245	237	bamD	5	239	WP_094398827.1	3
975	46.1224	22.124	33.5	1.8	2	113	76	22124	245	236	bamD	136	237	WP_153124777.1	125
976	32.2449	30.38	33.9	1.8	2	79	50	30380	245	115	bamD	38	708	RKW63770.1	634
977	25.3061	32.258	33.9	1.9	1	62	38	32258	245	107	bamD	46	700	WP_100371442.1	643
978	32.2449	30.38	33.9	1.9	2	79	50	30380	245	115	bamD	38	708	WP_009236188.1	634
979	25.3061	32.258	33.9	2	1	62	38	32258	245	107	bamD	46	700	WP_099984546.1	643
980	99.5918	20.902	33.5	2	5	244	170	20902	245	234	bamD	4	235	CCX66690.1	2
981	25.3061	32.258	33.9	2.1	1	62	38	32258	245	107	bamD	46	700	WP_096408057.1	643
982	47.7551	24.786	33.1	2.1	3	117	70	24786	245	233	bamD	132	224	QJR98034.1	111
983	87.7551	23.721	33.1	2.2	5	215	138	23721	245	236	bamD	36	237	EFI49393.1	35
984	18.3673	35.556	31.6	2.2	1	45	26	35556	245	43	bamD	2	71	CCX65770.1	27
985	79.5918	25.128	33.1	2.4	4	195	122	25128	245	218	bamD	36	220	WP_004370951.1	38
986	87.3469	21.028	33.1	2.5	4	214	145	21028	245	236	bamD	36	238	WP_091826242.1	36
987	38.7755	28.421	33.1	2.5	2	95	58	28421	245	107	bamD	13	86	MUU05602.1	2
988	87.7551	23.721	33.1	2.6	5	215	138	23721	245	236	bamD	36	240	WP_039873101.1	38
989	36.3265	24.719	32	2.7	2	89	60	24719	245	92	bamD	4	82	MBD9229709.1	1
990	38.7755	28.421	33.5	2.7	2	95	58	28421	245	107	bamD	13	708	RGS47809.1	624
991	38.7755	28.421	33.5	2.7	2	95	58	28421	245	107	bamD	13	708	WP_117727932.1	624
992	38.7755	28.421	33.5	2.7	2	95	58	28421	245	107	bamD	13	708	WP_153102773.1	624
993	38.7755	28.421	33.5	2.7	2	95	58	28421	245	107	bamD	13	708	WP_153082229.1	624
994	38.7755	28.421	33.5	2.8	2	95	58	28421	245	107	bamD	13	708	QNT65850.1	624
995	79.5918	25.128	32.7	2.8	4	195	122	25128	245	218	bamD	36	220	WP_018920355.1	38
996	38.7755	28.421	33.1	2.8	2	95	58	28421	245	107	bamD	13	708	WP_118201080.1	624
997	38.7755	28.421	33.1	2.8	2	95	58	28421	245	107	bamD	13	708	WP_006846681.1	624
998	38.7755	28.421	33.1	2.8	2	95	58	28421	245	107	bamD	13	708	WP_117694802.1	624
999	38.7755	28.421	33.1	2.8	2	95	58	28421	245	107	bamD	13	708	WP_118064122.1	624
1000	38.7755	28.421	33.1	2.8	2	95	58	28421	245	107	bamD	13	708	WP_153113726.1	624
1001	38.7755	28.421	33.1	2.8	2	95	58	28421	245	107	bamD	13	708	WP_118140521.1	624
1002	38.7755	28.421	33.1	2.8	2	95	58	28421	245	107	bamD	13	708	WP_118254726.1	624
1003	38.7755	28.421	33.1	2.8	2	95	58	28421	245	107	bamD	13	708	WP_118085940.1	624
1004	38.7755	28.421	33.1	2.9	2	95	58	28421	245	107	bamD	13	708	HBI98387.1	624
1005	38.7755	28.421	33.1	2.9	2	95	58	28421	245	107	bamD	13	708	WP_153088966.1	624
1006	38.7755	28.421	33.1	2.9	2	95	58	28421	245	107	bamD	13	708	MBD9087383.1	624
1007	38.7755	28.421	33.1	2.9	2	95	58	28421	245	107	bamD	13	708	WP_118190779.1	624
1008	38.7755	28.421	33.1	2.9	2	95	58	28421	245	107	bamD	13	708	WP_153085538.1	624
1009	38.7755	28.421	33.1	2.9	2	95	58	28421	245	107	bamD	13	708	MBD9059905.1	624
1010	38.7755	28.421	33.1	2.9	2	95	58	28421	245	107	bamD	13	708	WP_118415385.1	624
1011	38.7755	28.421	33.1	2.9	2	95	58	28421	245	107	bamD	13	708	WP_153072456.1	624
1012	38.7755	28.421	33.1	2.9	2	95	58	28421	245	107	bamD	13	708	WP_153118198.1	624
1013	38.7755	28.421	33.1	2.9	2	95	58	28421	245	107	bamD	13	708	WP_118152848.1	624
1014	38.7755	28.421	33.1	3	2	95	58	28421	245	107	bamD	13	708	WP_153095288.1	624
1015	38.7755	28.421	33.1	3	2	95	58	28421	245	107	bamD	13	708	RHK09467.1	624
1016	38.7755	28.421	33.1	3	2	95	58	28421	245	107	bamD	13	708	CDA66721.1	624
1017	38.7755	28.421	33.1	3	2	95	58	28421	245	107	bamD	13	708	WP_153104352.1	624
1018	38.7755	28.421	33.1	3	2	95	58	28421	245	107	bamD	13	708	WP_153079464.1	624
1019	38.7755	28.421	33.1	3	2	95	58	28421	245	107	bamD	13	708	WP_153087183.1	624
1020	38.7755	28.421	33.1	3	2	95	58	28421	245	107	bamD	13	708	WP_153092257.1	624
1021	38.7755	28.421	33.1	3	2	95	58	28421	245	107	bamD	13	708	MUU13867.1	624
1022	25.3061	32.258	33.1	3.1	1	62	38	32258	245	107	bamD	46	700	WP_099996044.1	643
1023	40.8163	25	32.7	3.1	2	100	63	25000	245	223	bamD	136	224	WP_004370705.1	125
1024	38.7755	28.421	33.1	3.1	2	95	58	28421	245	107	bamD	13	708	WP_153137416.1	624
1025	38.7755	28.421	33.1	3.1	2	95	58	28421	245	107	bamD	13	708	WP_118080387.1	624
1026	36.3265	24.719	32	3.2	2	89	60	24719	245	92	bamD	4	82	CCZ13575.1	1
1027	38.7755	28.421	33.1	3.2	2	95	58	28421	245	107	bamD	13	708	WP_144154279.1	624
1028	40.8163	25	32.7	3.3	2	100	63	25000	245	223	bamD	136	237	EFC71727.2	138
1029	25.3061	32.258	33.1	3.4	1	62	38	32258	245	107	bamD	46	700	WP_028906382.1	643
1030	40.8163	25	32.7	3.5	2	100	63	25000	245	223	bamD	136	224	WP_023982929.1	125
1031	64.0816	24.204	32.7	3.6	3	157	109	24204	245	192	bamD	36	181	WP_172175293.1	35
1032	12.2449	43.333	32.7	3.6	0	30	17	43333	245	30	bamD	1	30	WP_100019582.1	1
1033	12.2449	43.333	32.7	3.7	0	30	17	43333	245	30	bamD	1	30	WP_099984143.1	1
1034	12.2449	43.333	32.7	3.7	0	30	17	43333	245	30	bamD	1	30	WP_097655731.1	1
1035	27.3469	32.836	32.7	3.9	1	67	41	32836	245	107	bamD	41	695	WP_008822370.1	633
1036	40.8163	25	32.3	3.9	2	100	63	25000	245	223	bamD	136	226	WP_009227575.1	127
1037	27.3469	32.836	32.7	3.9	1	67	41	32836	245	107	bamD	41	695	WP_025790576.1	633
1038	27.3469	32.836	32.7	4	1	67	41	32836	245	107	bamD	41	695	WP_036868362.1	633
1039	86.9388	21.596	32.3	4.1	5	213	145	21596	245	236	bamD	36	223	GAY27703.1	21
1040	25.3061	32.258	32.7	4.4	1	62	38	32258	245	107	bamD	46	700	WP_045167791.1	643
1041	26.9388	33.333	32.7	5	2	66	39	33333	245	190	bamD	130	569	MBD9246584.1	504
1042	91.8367	21.778	32	5.1	4	225	153	21778	245	233	bamD	18	243	CDE08552.1	33
1043	26.9388	33.333	32.3	5.1	2	66	39	33333	245	190	bamD	130	569	WP_094880192.1	504
1044	64.898	23.899	32.3	5.2	6	159	95	23899	245	137	bamD	3	158	MBA7489315.1	2
1045	64.898	23.899	32.3	5.2	6	159	95	23899	245	137	bamD	3	158	MBA7489315.1	2
1046	100	21.224	32	5.6	7	245	170	21224	245	236	bamD	5	237	WP_118354771.1	3
1047	100	21.224	32	5.9	7	245	170	21224	245	236	bamD	5	245	CDE33870.1	11
1048	100	21.224	32	5.9	7	245	170	21224	245	236	bamD	5	237	WP_007897568.1	3
1049	13.8776	47.059	31.2	6.1	1	34	16	47059	245	32	bamD	1	34	WP_025816038.1	1
1050	11.4286	50	32	6.3	1	28	13	50000	245	27	bamD	1	28	WP_036880635.1	1
1051	77.551	22.105	32	6.5	4	190	137	22105	245	196	bamD	8	193	SFO85805.1	14
1052	23.6735	34.483	31.6	7.3	3	58	31	34483	245	61	bamD	4	51	WP_044080661.1	1
1053	29.7959	35.616	31.6	7.3	3	73	34	35616	245	108	bamD	45	121	WP_029905419.1	53
1054	89.7959	20.455	31.6	7.5	4	220	153	20455	245	218	bamD	11	220	WP_172344196.1	11
1055	87.7551	21.395	31.6	8	5	215	146	21395	245	209	bamD	8	210	WP_092072022.1	6
1056	25.7143	28.571	31.6	8.3	2	63	42	28571	245	163	bamD	104	168	WP_007573733.1	106
1057	42.8571	25.714	31.2	8.9	5	105	63	25714	245	110	bamD	17	111	KGF40155.1	11
1058	19.1837	38.298	31.6	9.1	1	47	28	38298	245	47	bamD	1	52	WP_018967234.1	7
1059	25.3061	30.645	31.6	9.4	1	62	39	30645	245	107	bamD	46	700	WP_100190261.1	643
1060	43.2653	25.472	31.2	9.5	3	106	64	25472	245	233	bamD	140	234	HAT62241.1	132
1061	46.9388	22.609	31.2	9.6	3	115	75	22609	245	234	bamD	132	235	WP_126677703.1	123
1062	25.3061	30.645	31.6	9.8	1	62	39	30645	245	107	bamD	46	700	WP_099977560.1	643
1063	25.3061	30.645	31.6	9.9	1	62	39	30645	245	107	bamD	46	700	WP_097656945.1	643
1319	54.5171	29.143	61.6	1.06e-09	4	175	118	29143	321	255	birA	84	179	WP_006847855.1	8
1320	53.5826	29.07	61.6	1.19e-09	4	172	116	29070	321	252	birA	84	176	WP_153138740.1	8
1321	52.648	29.586	61.2	1.22e-09	4	169	113	29586	321	252	birA	87	166	CDA66849.1	1
1322	54.5171	29.143	61.6	1.33e-09	4	175	118	29143	321	255	birA	84	179	WP_118139326.1	8
1323	53.5826	29.07	61.2	1.38e-09	4	172	116	29070	321	252	birA	84	176	WP_118151627.1	8
1324	53.5826	29.07	61.2	1.45e-09	4	172	116	29070	321	252	birA	84	176	WP_153118896.1	8
1325	46.729	29.333	61.2	1.49e-09	4	150	91	29333	321	250	birA	108	175	WP_053397374.1	34
1326	40.81	32.061	61.6	1.57e-09	4	131	82	32061	321	209	birA	84	152	WP_025000096.1	24
1327	53.5826	29.07	61.2	1.61e-09	4	172	116	29070	321	252	birA	84	176	HAW83992.1	8
1328	53.5826	29.07	61.2	1.62e-09	4	172	116	29070	321	252	birA	84	176	WP_153093207.1	8
1329	53.271	29.825	60.8	1.66e-09	4	171	106	29825	321	252	birA	84	166	MQO97057.1	8
1330	46.1059	29.73	61.2	1.66e-09	4	148	93	29730	321	250	birA	108	175	WP_125105560.1	34
1331	53.5826	29.07	61.2	1.73e-09	4	172	116	29070	321	252	birA	84	176	WP_118190975.1	8
1332	54.8287	28.977	61.2	1.82e-09	5	176	117	28977	321	255	birA	84	179	MBD9059259.1	8
1333	51.0903	29.878	60.8	2.03e-09	4	164	109	29878	321	243	birA	84	169	CDA95676.1	8
1334	53.8941	28.902	60.8	2.27e-09	5	173	115	28902	321	252	birA	84	176	WP_153085429.1	8
1335	53.5826	29.07	60.5	2.53e-09	4	172	116	29070	321	252	birA	84	176	WP_117727845.1	8
1336	40.4984	34.615	60.5	2.53e-09	1	130	84	34615	321	212	birA	84	137	CCY64574.1	8
1337	45.7944	29.252	60.8	2.57e-09	4	147	97	29252	321	253	birA	108	183	EHO68008.1	43
1338	50.7788	26.994	60.5	2.75e-09	6	163	108	26994	321	246	birA	88	168	WP_073209836.1	13
1339	53.5826	29.07	60.5	2.75e-09	4	172	116	29070	321	252	birA	84	176	WP_118066015.1	8
1340	45.7944	29.252	60.8	2.78e-09	4	147	97	29252	321	253	birA	108	190	WP_044113612.1	50
1341	57.3209	29.348	60.5	2.83e-09	6	184	119	29348	321	263	birA	84	184	WP_118255005.1	8
1342	53.5826	28.488	60.5	2.91e-09	4	172	117	28488	321	252	birA	84	176	MUU04855.1	8
1343	53.5826	28.488	60.5	2.92e-09	4	172	117	28488	321	252	birA	84	176	WP_153083723.1	8
1344	54.8287	28.977	60.5	3.03e-09	5	176	117	28977	321	255	birA	84	179	MBD9087033.1	8
1345	53.5826	28.488	60.5	3.14e-09	4	172	117	28488	321	252	birA	84	176	HBI98460.1	8
1346	53.5826	28.488	60.5	3.14e-09	4	172	117	28488	321	252	birA	84	176	HBI98460.1	8
1347	42.3676	28.676	60.5	3.19e-09	3	136	94	28676	321	220	birA	87	145	WP_025065086.1	11
1348	53.8941	29.48	60.1	3.86e-09	5	173	114	29480	321	252	birA	84	176	WP_153083010.1	8
1349	45.7944	29.252	60.1	4.23e-09	4	147	97	29252	321	253	birA	108	183	WP_154652127.1	43
1350	53.8941	29.48	59.7	5.23e-09	5	173	114	29480	321	252	birA	84	176	WP_117693981.1	8
1351	57.0093	27.869	60.1	5.87e-09	6	183	110	27869	321	252	birA	89	213	CCY01837.1	34
1352	53.8941	28.324	59.7	5.91e-09	4	173	116	28324	321	252	birA	84	176	WP_153072378.1	8
1353	53.5826	28.488	59.3	6.08e-09	4	172	117	28488	321	252	birA	84	176	WP_118081207.1	8
1354	40.4984	30	59.3	7.77e-09	3	130	84	30000	321	209	birA	84	134	WP_094879919.1	8
1355	38.3178	28.455	57.8	8e-09	0	123	88	28455	321	209	birA	87	133	RKW57938.1	11
1356	50.1558	29.814	58.5	1.83e-08	5	161	82	29814	321	212	birA	81	161	WP_082026237.1	3
1357	50.1558	29.814	58.2	1.96e-08	5	161	82	29814	321	212	birA	81	164	CDD05189.1	6
1358	50.1558	29.814	58.2	2.09e-08	5	161	82	29814	321	212	birA	81	161	WP_156132441.1	3
1359	53.5826	27.907	57.8	2.18e-08	4	172	118	27907	321	252	birA	84	176	WP_118086157.1	8
1360	54.8287	28.409	57.8	2.61e-08	5	176	118	28409	321	255	birA	84	179	RHK09864.1	8
1361	54.8287	28.409	57.8	2.61e-08	5	176	118	28409	321	255	birA	84	179	RHK09864.1	8
1362	41.1215	29.545	57.4	2.79e-08	4	132	82	29545	321	209	birA	84	134	MBD9246433.1	8
1363	53.5826	28.488	57.4	2.87e-08	4	172	117	28488	321	252	birA	84	176	WP_144153664.1	8
1364	39.2523	28.571	57.4	3.59e-08	0	126	90	28571	321	209	birA	84	133	WP_036903201.1	8
1365	50.1558	29.193	56.6	7.59e-08	5	161	83	29193	321	212	birA	81	161	WP_082030925.1	3
1366	44.5483	30.769	50.4	7.34e-06	3	143	65	30769	321	212	birA	99	146	HCD78277.1	9
1367	16.5109	32.075	42	0.006	0	53	36	32075	321	60	birA	8	62	WP_094402953.1	10
1368	17.134	40	42	0.006	1	55	32	40000	321	61	birA	8	64	CCZ12229.1	10
1369	17.134	40	42	0.006	1	55	32	40000	321	61	birA	8	64	MBD9230208.1	10
1370	14.9533	31.25	33.1	0.72	0	48	33	31250	321	57	birA	10	75	HBF06389.1	28
1371	19.3146	33.871	34.7	1.1	2	62	36	33871	321	67	birA	8	68	WP_104368952.1	10
1372	19.3146	33.871	34.3	1.5	2	62	36	33871	321	67	birA	8	68	WP_172205715.1	10
1373	19.3146	35.484	34.3	1.8	2	62	37	35484	321	60	birA	1	61	WP_172174924.1	1
1374	19.0031	31.148	33.9	2	1	61	41	31148	321	68	birA	8	69	WP_053398534.1	10
1375	19.0031	31.148	33.9	2	1	61	41	31148	321	68	birA	8	69	WP_125105662.1	10
1376	19.0031	31.148	33.9	2.6	1	61	41	31148	321	68	birA	8	102	CCX68870.1	43
1377	16.5109	32.075	33.5	3.1	0	53	36	32075	321	57	birA	5	475	SDG20607.1	423
1378	17.757	33.333	32.7	3.1	1	57	34	33333	321	58	birA	2	55	CCX43090.1	3
1379	16.5109	32.075	33.5	3.1	0	53	36	32075	321	57	birA	5	471	SDN91609.1	419
1380	16.5109	32.075	33.5	3.2	0	53	36	32075	321	57	birA	5	464	WP_091852557.1	412
1381	16.5109	32.075	33.5	3.4	0	53	36	32075	321	57	birA	5	468	WP_091813945.1	416
1382	16.5109	32.075	33.5	3.9	0	53	36	32075	321	57	birA	5	484	WP_094464163.1	432
1383	26.7913	33.721	33.1	4.2	3	86	46	33721	321	95	birA	19	192	CDA94753.1	109
1384	25.2336	29.63	33.5	4.2	3	81	53	29630	321	170	birA	93	1033	WP_172344705.1	954
1385	16.5109	30.189	33.1	4.5	1	53	36	30189	321	60	birA	8	61	CDD20005.1	10
1386	21.4953	27.536	31.6	4.8	2	69	38	27536	321	66	birA	10	102	WP_029903222.1	34
1387	27.7259	26.966	32.7	5	3	89	54	26966	321	101	birA	23	112	WP_024989789.1	25
1388	16.5109	32.075	32.7	5.7	1	53	35	32075	321	60	birA	8	61	HCD66099.1	10
1389	16.5109	30.189	32.7	5.8	1	53	36	30189	321	60	birA	8	61	MBD9298631.1	10
1390	16.5109	32.075	32.3	6.1	1	53	35	32075	321	60	birA	8	61	MBD9260860.1	10
1391	16.5109	32.075	32.3	6.1	1	53	35	32075	321	60	birA	8	61	MBD9073591.1	10
1392	19.0031	34.426	32.3	6.4	2	61	35	34426	321	59	birA	1	58	HCD77741.1	1
1393	16.5109	30.189	32.3	6.7	1	53	36	30189	321	60	birA	8	61	WP_022111230.1	10
1394	16.5109	32.075	32.3	6.9	1	53	35	32075	321	60	birA	8	61	WP_158463201.1	10
1395	27.4143	26.136	32.7	7	2	88	55	26136	321	113	birA	36	883	WP_023058688.1	796
1396	16.5109	32.075	32.3	7.1	1	53	35	32075	321	60	birA	8	61	OZT05201.1	10
1397	16.5109	32.075	32.3	7.2	1	53	35	32075	321	60	birA	8	61	MBD9247067.1	10
1398	16.5109	32.075	32.3	7.5	1	53	35	32075	321	60	birA	8	59	WP_176452141.1	8
1399	27.4143	27.273	32.3	8.9	2	88	54	27273	321	113	birA	36	874	KGF40859.1	787
1400	27.4143	27.273	32.3	8.9	2	88	54	27273	321	113	birA	36	883	WP_052048159.1	796
1401	14.9533	31.25	32	9	0	48	33	31250	321	57	birA	10	371	WP_153091024.1	324
1402	27.4143	27.273	32.3	9.6	2	88	54	27273	321	113	birA	36	883	WP_102697207.1	796
1405	40.9091	27.778	36.2	0.13	4	90	55	27778	220	107	can	26	105	WP_104368531.1	18
1406	48.1818	28.302	33.9	0.74	5	106	62	28302	220	103	can	4	99	WP_073210737.1	2
1407	38.6364	25.882	33.5	1	2	85	59	25882	220	103	can	23	98	CDA53462.1	14
1408	53.6364	26.271	33.5	1.1	6	118	67	26271	220	134	can	26	124	WP_172272382.1	18
1409	82.2727	26.519	34.3	1.3	10	181	107	26519	220	177	can	11	543	WP_091766703.1	375
1410	82.2727	26.519	34.3	1.3	10	181	107	26519	220	177	can	11	543	WP_103915276.1	375
1411	43.6364	27.083	33.1	1.3	4	96	60	27083	220	103	can	14	99	WP_073204773.1	8
1412	38.1818	27.381	33.1	1.3	3	84	53	27381	220	103	can	26	99	MBD8997732.1	18
1413	82.2727	26.519	33.9	1.3	10	181	107	26519	220	177	can	11	543	WP_036914388.1	375
1414	41.3636	26.374	33.1	1.6	3	91	59	26374	220	110	can	26	106	WP_172180962.1	18
1415	38.1818	27.381	32.3	2.2	3	84	53	27381	220	103	can	26	99	WP_118063903.1	18
1416	38.1818	27.381	32.3	2.4	3	84	53	27381	220	103	can	26	100	EFB35825.1	19
1417	38.1818	27.381	32.3	2.4	3	84	53	27381	220	103	can	26	99	WP_040553038.1	18
1418	49.5455	28.44	32.3	2.4	5	109	64	28440	220	103	can	1	101	SEA02050.1	1
1419	38.1818	27.381	32.3	2.4	3	84	53	27381	220	103	can	26	100	CCZ12604.1	19
1420	38.1818	27.381	32.3	2.4	3	84	53	27381	220	103	can	26	99	MQM46808.1	18
1421	38.1818	27.381	32.3	2.5	3	84	53	27381	220	103	can	26	99	MBD9229486.1	18
1422	38.1818	27.381	32.3	2.5	3	84	53	27381	220	103	can	26	99	WP_118416740.1	18
1423	38.1818	27.381	32.3	2.6	3	84	53	27381	220	103	can	26	99	WP_117587733.1	18
1424	38.1818	27.381	32.3	2.6	3	84	53	27381	220	103	can	26	99	WP_117727889.1	18
1425	37.2727	26.829	32.3	2.6	2	82	56	26829	220	103	can	26	99	MST77453.1	18
1426	38.1818	27.381	32.3	2.6	3	84	53	27381	220	103	can	26	100	WP_153073209.1	19
1427	38.1818	27.381	32.3	2.6	3	84	53	27381	220	103	can	26	100	WP_022120862.1	19
1428	38.1818	27.381	32.3	2.6	3	84	53	27381	220	103	can	26	99	WP_118152926.1	18
1429	37.2727	26.829	32.3	2.7	2	82	56	26829	220	103	can	26	100	WP_154480897.1	19
1430	37.2727	26.829	32.3	2.7	2	82	56	26829	220	103	can	26	100	WP_118120089.1	19
1431	38.1818	27.381	32.3	2.7	3	84	53	27381	220	103	can	26	99	WP_117692364.1	18
1432	38.1818	27.381	32.3	2.8	3	84	53	27381	220	103	can	26	99	MQN14391.1	18
1433	38.1818	27.381	32.3	2.8	3	84	53	27381	220	103	can	26	99	MBD9058027.1	18
1434	38.1818	25	32.3	2.8	3	84	55	25000	220	103	can	26	99	HCD78081.1	18
1435	38.1818	27.381	32.3	2.8	3	84	53	27381	220	103	can	26	99	MBD9299649.1	18
1436	38.1818	27.381	32.3	2.9	3	84	53	27381	220	103	can	26	99	MQO10025.1	18
1437	38.1818	27.381	32.3	2.9	3	84	53	27381	220	103	can	26	99	MQN80486.1	18
1438	32.7273	30.556	33.1	2.9	1	72	45	30556	220	212	can	146	562	WP_051651834.1	491
1439	38.1818	27.381	32.3	2.9	3	84	53	27381	220	103	can	26	100	CDD18325.1	19
1440	38.1818	27.381	32.3	3	3	84	53	27381	220	103	can	26	100	WP_153129686.1	19
1441	38.1818	27.381	32.3	3	3	84	53	27381	220	103	can	26	100	WP_153097310.1	19
1442	38.1818	27.381	32.3	3	3	84	53	27381	220	103	can	26	100	WP_153091286.1	19
1443	38.1818	27.381	32.3	3	3	84	53	27381	220	103	can	26	99	MQN60915.1	18
1444	38.1818	27.381	32.3	3	3	84	53	27381	220	103	can	26	99	MBD8993558.1	18
1445	38.1818	27.381	32.3	3	3	84	53	27381	220	103	can	26	100	WP_153123007.1	19
1446	37.2727	26.829	32	3.1	2	82	56	26829	220	103	can	26	99	WP_117661547.1	18
1447	38.1818	27.381	32	3.2	3	84	53	27381	220	103	can	26	99	WP_089545080.1	18
1448	37.2727	25.61	32	3.4	2	82	57	25610	220	103	can	26	99	WP_167639563.1	18
1449	38.1818	26.19	32	3.4	3	84	54	26190	220	103	can	26	99	WP_144151736.1	18
1450	38.1818	26.19	32	3.5	3	84	54	26190	220	103	can	26	99	WP_094387425.1	18
1451	37.2727	25.61	32	3.6	2	82	57	25610	220	103	can	26	100	TFH70874.1	19
1452	38.1818	26.19	32	3.6	3	84	54	26190	220	103	can	26	99	MBD9087592.1	18
1453	48.1818	28.302	32	3.8	5	106	62	28302	220	103	can	4	99	WP_091957559.1	2
1454	38.1818	26.19	32	3.9	3	84	54	26190	220	103	can	26	99	MBD9086984.1	18
1455	46.8182	24.272	31.2	5.7	4	103	68	24272	220	110	can	14	106	WP_006282648.1	8
1456	32.7273	30.556	32	5.8	1	72	45	30556	220	212	can	146	562	WP_051522903.1	491
1457	46.8182	24.272	31.2	6.1	4	103	68	24272	220	110	can	14	106	WP_027452799.1	8
1458	37.7273	22.892	31.6	7.5	1	83	55	22892	220	212	can	139	408	WP_074833141.1	326
1459	41.3636	25.275	30.8	8.8	3	91	60	25275	220	110	can	26	106	WP_094382233.1	18
1460	38.1818	27.381	30.8	8.9	3	84	53	27381	220	103	can	26	99	WP_028907976.1	18
1461	50.9091	25	30.8	9.1	5	112	70	25000	220	109	can	4	105	WP_021826652.1	2
1462	38.1818	27.381	30.8	9.1	3	84	53	27381	220	103	can	26	99	WP_073043220.1	18
1463	38.1818	27.381	30.8	9.4	3	84	53	27381	220	103	can	26	99	WP_092072307.1	18
1464	50.9091	25	30.8	9.4	5	112	70	25000	220	109	can	4	105	WP_044079136.1	2
1465	50.9091	25	30.8	9.5	5	112	70	25000	220	109	can	4	106	EFV04395.1	3
1721	19.4175	33.75	34.7	1	3	80	46	33750	412	131	cca	59	122	WP_025836991.1	43
1722	19.4175	33.75	34.7	1	3	80	46	33750	412	131	cca	59	122	WP_025836991.1	43
1723	23.5437	28.866	34.7	2.5	3	97	57	28866	412	186	cca	98	154	WP_025796620.1	62
1724	11.8932	36.735	34.7	2.5	1	49	26	36735	412	127	cca	79	706	WP_094879817.1	663
1725	26.4563	21.101	33.9	3.6	2	109	75	21101	412	351	cca	253	350	WP_126678652.1	243
1726	18.932	25.641	33.9	4.2	2	78	51	25641	412	273	cca	203	344	WP_126678835.1	267
1727	26.2136	25	33.5	5	3	108	72	25000	412	351	cca	253	349	WP_153092039.1	242
1728	26.2136	25	33.5	5.3	3	108	72	25000	412	351	cca	253	349	WP_153124881.1	242
1729	18.4466	32.895	33.1	5.4	5	76	42	32895	412	319	cca	245	132	WP_006281551.1	65
1730	26.2136	25	33.1	6.9	3	108	72	25000	412	351	cca	253	349	WP_153092449.1	242
1731	26.2136	25	33.1	7	3	108	72	25000	412	351	cca	253	349	WP_118254474.1	242
1732	26.2136	25	33.1	7.1	3	108	72	25000	412	351	cca	253	349	WP_153138302.1	242
1733	26.2136	25	33.1	7.1	3	108	72	25000	412	351	cca	253	349	WP_153073124.1	242
1734	26.2136	25	33.1	7.3	3	108	72	25000	412	351	cca	253	349	WP_118080216.1	242
1735	26.2136	25	33.1	7.3	3	108	72	25000	412	351	cca	253	349	WP_153087337.1	242
1736	26.2136	25	33.1	7.3	3	108	72	25000	412	351	cca	253	349	RGS46552.1	242
1737	26.2136	25	33.1	7.4	3	108	72	25000	412	351	cca	253	349	RGX98226.1	242
1738	26.2136	25	33.1	7.5	3	108	72	25000	412	351	cca	253	349	WP_154481813.1	242
1739	23.5437	27.835	33.1	7.5	3	97	58	27835	412	186	cca	98	154	WP_009162199.1	62
1740	26.2136	25	32.7	7.5	3	108	72	25000	412	351	cca	253	349	WP_117586095.1	242
1741	26.2136	25	32.7	7.5	3	108	72	25000	412	351	cca	253	349	WP_144152466.1	242
1742	26.2136	25	32.7	7.5	3	108	72	25000	412	351	cca	253	349	WP_006848885.1	242
1743	26.2136	25	32.7	7.6	3	108	72	25000	412	351	cca	253	349	WP_118139761.1	242
1744	26.2136	25	32.7	7.6	3	108	72	25000	412	351	cca	253	349	MBD9056699.1	242
1745	26.2136	25	32.7	7.6	3	108	72	25000	412	351	cca	253	349	WP_119237782.1	242
1746	26.2136	25	32.7	7.6	3	108	72	25000	412	351	cca	253	349	WP_118066076.1	242
1747	26.2136	25	32.7	7.6	3	108	72	25000	412	351	cca	253	349	CDA67344.1	242
1748	26.2136	25	32.7	7.6	3	108	72	25000	412	351	cca	253	349	WP_118152550.1	242
1749	26.2136	25	32.7	7.7	3	108	72	25000	412	351	cca	253	349	MBD8993247.1	242
1750	26.2136	25	32.7	7.7	3	108	72	25000	412	351	cca	253	349	WP_118067358.1	242
1751	26.2136	25	32.7	7.7	3	108	72	25000	412	351	cca	253	349	WP_153127755.1	242
1752	26.2136	25	32.7	7.8	3	108	72	25000	412	351	cca	253	349	WP_117729262.1	242
1753	26.2136	25	32.7	7.8	3	108	72	25000	412	351	cca	253	349	WP_153097134.1	242
1754	26.2136	25	32.7	7.9	3	108	72	25000	412	351	cca	253	349	WP_119249581.1	242
1755	26.2136	25	32.7	7.9	3	108	72	25000	412	351	cca	253	349	WP_118312682.1	242
1756	26.2136	25	32.7	7.9	3	108	72	25000	412	351	cca	253	349	WP_117664082.1	242
1757	26.2136	25	32.7	7.9	3	108	72	25000	412	351	cca	253	349	WP_117695076.1	242
1758	26.2136	25	32.7	8.1	3	108	72	25000	412	351	cca	253	349	WP_089543036.1	242
1760	46.2025	27.397	48.9	1.81e-05	6	146	89	27397	316	234	coaA	90	136	WP_077196012.1	7
1761	70.8861	23.661	48.5	2.51e-05	9	224	127	23661	316	308	coaA	90	202	CDA94749.1	18
1762	47.4684	26.667	48.1	2.97e-05	7	150	85	26667	316	234	coaA	90	135	WP_008446776.1	6
1763	47.4684	26.667	47	8.06e-05	8	150	85	26667	316	234	coaA	90	136	WP_004362233.1	7
1764	72.1519	26.316	45.8	0.000175	12	228	117	26316	316	308	coaA	90	188	CCY16150.1	3
1765	72.1519	26.316	45.8	0.000175	12	228	117	26316	316	308	coaA	90	188	CCY16150.1	3
1766	47.1519	26.174	45.1	0.000289	7	149	87	26174	316	234	coaA	90	136	WP_039851573.1	7
1767	47.1519	26.174	45.4	0.000292	7	149	87	26174	316	234	coaA	90	151	EEX17351.1	22
1768	47.4684	26	45.1	0.000308	8	150	86	26000	316	234	coaA	90	136	WP_006044931.1	7
1769	46.519	28.571	45.1	0.000347	7	147	86	28571	316	234	coaA	90	139	WP_036899702.1	10
1770	47.7848	27.152	45.1	0.000348	9	151	83	27152	316	234	coaA	90	136	WP_130828587.1	7
1771	46.519	28.571	44.7	0.000442	7	147	86	28571	316	234	coaA	90	139	WP_062434517.1	10
1772	47.1519	25.503	44.7	0.000443	7	149	88	25503	316	234	coaA	90	136	WP_018910199.1	7
1773	48.4177	26.144	44.3	0.000536	6	153	96	26144	316	234	coaA	83	139	WP_004369929.1	3
1774	47.7848	25.166	43.9	0.000694	7	151	90	25166	316	235	coaA	89	133	WP_091958482.1	2
1775	46.2025	26.712	43.9	0.000841	6	146	90	26712	316	234	coaA	90	135	WP_009229273.1	6
1776	46.2025	26.712	43.5	0.001	6	146	90	26712	316	234	coaA	90	135	WP_070721476.1	6
1777	47.4684	26.667	43.1	0.001	8	150	85	26667	316	234	coaA	90	136	WP_004358085.1	7
1778	46.8354	27.703	43.1	0.002	8	148	86	27703	316	234	coaA	90	136	WP_028898240.1	7
1779	47.7848	25.828	42.7	0.002	9	151	85	25828	316	234	coaA	90	136	WP_009227346.1	7
1780	46.2025	26.027	42.7	0.002	6	146	91	26027	316	234	coaA	90	136	WP_019188900.1	7
1781	47.7848	25.166	42.7	0.002	7	151	90	25166	316	234	coaA	88	134	HCC88145.1	3
1782	46.519	26.531	42.7	0.002	7	147	89	26531	316	234	coaA	90	132	CCY64793.1	3
1783	46.519	25.17	42.7	0.002	7	147	91	25170	316	234	coaA	90	142	WP_036874843.1	13
1784	47.1519	24.161	42.7	0.002	7	149	90	24161	316	234	coaA	90	136	WP_025067718.1	7
1785	46.519	25.17	42.7	0.002	7	147	91	25170	316	234	coaA	90	142	WP_004349409.1	13
1786	46.519	25.17	42.4	0.002	7	147	91	25170	316	234	coaA	90	141	ERT61079.1	12
1787	46.519	26.531	42.4	0.002	7	147	89	26531	316	234	coaA	90	136	WP_018463666.1	7
1788	47.1519	27.517	42.4	0.003	8	149	85	27517	316	234	coaA	90	136	WP_025876187.1	7
1789	68.9873	22.936	42.4	0.003	10	218	125	22936	316	284	coaA	90	203	WP_048739213.1	6
1790	68.9873	22.936	42.4	0.003	10	218	125	22936	316	284	coaA	90	203	WP_004337739.1	6
1791	47.1519	24.161	42.4	0.003	7	149	90	24161	316	234	coaA	90	150	AEA21717.1	21
1792	47.1519	24.161	42.4	0.003	7	149	90	24161	316	234	coaA	90	150	EGC86531.1	21
1793	47.1519	24.161	42.4	0.003	7	149	90	24161	316	234	coaA	90	136	WP_036876662.1	7
1794	70.8861	24.107	42	0.003	10	224	126	24107	316	308	coaA	90	194	WP_091821357.1	10
1795	47.1519	28.859	42	0.004	9	149	83	28859	316	234	coaA	90	132	WP_126678281.1	3
1796	46.2025	26.712	41.6	0.004	6	146	90	26712	316	234	coaA	90	132	CCX44811.1	3
1797	46.8354	26.351	41.6	0.004	8	148	88	26351	316	234	coaA	90	136	WP_018362664.1	7
1798	68.6709	23.041	41.6	0.004	10	217	126	23041	316	284	coaA	90	203	WP_036866946.1	6
1799	46.2025	26.027	41.6	0.005	6	146	91	26027	316	234	coaA	90	135	WP_021993757.1	6
1800	70.2532	22.973	41.6	0.005	9	222	129	22973	316	307	coaA	90	189	WP_025816826.1	6
1801	47.1519	28.188	41.2	0.007	9	149	84	28188	316	234	coaA	90	153	MBB1551191.1	24
1802	47.1519	28.188	41.2	0.007	9	149	84	28188	316	234	coaA	90	153	MBB1530658.1	24
1803	48.4177	26.797	40.8	0.008	8	153	91	26797	316	234	coaA	85	144	WP_006950271.1	10
1804	47.1519	28.188	41.2	0.008	9	149	84	28188	316	234	coaA	90	153	MBB1539372.1	24
1805	46.2025	27.397	40.4	0.01	6	146	89	27397	316	234	coaA	90	132	WP_094382107.1	3
1806	47.4684	26	40.4	0.01	8	150	86	26000	316	234	coaA	90	139	WP_007173797.1	10
1807	47.1519	28.188	40.4	0.012	9	149	84	28188	316	234	coaA	90	132	WP_125233711.1	3
1808	46.519	24.49	40.4	0.012	7	147	92	24490	316	234	coaA	90	142	WP_102697386.1	13
1809	46.519	24.49	39.7	0.018	7	147	92	24490	316	234	coaA	90	139	HCJ47645.1	10
1810	46.2025	26.027	39.7	0.018	6	146	91	26027	316	234	coaA	90	132	WP_036876019.1	3
1811	46.2025	26.027	39.3	0.023	6	146	91	26027	316	234	coaA	90	132	WP_172343902.1	3
1812	46.8354	26.351	39.3	0.027	8	148	88	26351	316	234	coaA	90	137	WP_094402225.1	8
1813	46.519	26.531	38.9	0.032	7	147	89	26531	316	234	coaA	90	139	EHO70700.1	10
1814	46.519	26.531	38.9	0.033	7	147	89	26531	316	234	coaA	90	140	WP_019966801.1	11
1815	46.519	26.531	38.9	0.035	7	147	89	26531	316	234	coaA	90	140	WP_044113459.1	11
1816	47.1519	23.49	38.9	0.036	7	149	91	23490	316	234	coaA	90	136	WP_036853900.1	7
1817	46.519	27.211	38.5	0.043	7	147	88	27211	316	234	coaA	90	139	WP_021590133.1	10
1818	47.4684	24	38.5	0.048	8	150	89	24000	316	234	coaA	90	139	WP_107621426.1	10
1819	47.7848	29.801	38.5	0.051	11	151	79	29801	316	234	coaA	90	132	MBD9027491.1	3
1820	47.1519	26.174	38.5	0.053	9	149	87	26174	316	234	coaA	90	137	WP_094879898.1	8
1821	46.519	27.211	38.5	0.055	7	147	88	27211	316	234	coaA	90	139	WP_025879980.1	10
1822	27.5316	26.437	37.7	0.063	3	87	52	26437	316	234	coaA	148	82	HCN52567.1	8
1823	46.519	25.17	38.1	0.072	7	147	91	25170	316	234	coaA	90	137	CDB04283.1	8
1824	70.5696	21.973	38.1	0.073	9	223	132	21973	316	308	coaA	90	191	WP_004340202.1	7
1825	45.8861	24.828	37.7	0.082	4	145	94	24828	316	234	coaA	90	132	WP_021853986.1	3
1826	45.8861	24.828	37.7	0.082	4	145	94	24828	316	234	coaA	90	132	WP_021853986.1	3
1827	46.2025	25.342	37.7	0.092	6	146	92	25342	316	234	coaA	90	132	WP_036888671.1	3
1828	46.2025	24.658	37.7	0.093	6	146	93	24658	316	234	coaA	90	136	WP_007411573.1	7
1829	47.7848	29.801	37.7	0.096	11	151	79	29801	316	234	coaA	90	132	MBD9035954.1	3
1830	47.4684	23.333	37.7	0.098	8	150	90	23333	316	234	coaA	90	139	WP_092113694.1	10
1831	47.1519	28.188	37.4	0.11	9	149	84	28188	316	234	coaA	90	132	CDE87865.1	3
1832	46.519	25.85	37.4	0.11	7	147	90	25850	316	234	coaA	90	139	WP_107582208.1	10
1833	46.2025	24.658	37.4	0.13	6	146	93	24658	316	234	coaA	90	141	WP_103003193.1	12
1834	71.2025	24	37.4	0.13	11	225	125	24000	316	308	coaA	90	192	CCZ13740.1	8
1835	46.2025	24.658	37	0.14	6	146	93	24658	316	234	coaA	90	141	WP_008122177.1	12
1836	46.8354	24.324	36.6	0.21	7	148	93	24324	316	235	coaA	90	133	WP_074762267.1	3
1837	46.2025	23.973	36.2	0.26	6	146	94	23973	316	234	coaA	90	141	WP_036929915.1	12
1838	46.2025	23.973	36.2	0.27	6	146	94	23973	316	234	coaA	90	141	WP_028901131.1	12
1839	70.2532	22.523	36.2	0.28	9	222	130	22523	316	307	coaA	90	186	WP_104369024.1	3
1840	46.2025	23.973	35.8	0.35	6	146	94	23973	316	234	coaA	90	136	WP_006847270.1	7
1841	46.2025	23.973	35.8	0.35	6	146	94	23973	316	234	coaA	90	136	RGX93265.1	7
1842	46.2025	23.973	35.8	0.37	6	146	94	23973	316	234	coaA	90	136	WP_153113057.1	7
1843	46.2025	23.973	35.4	0.46	6	146	94	23973	316	234	coaA	90	136	WP_153094742.1	7
1844	47.1519	26.846	35	0.63	9	149	86	26846	316	234	coaA	90	137	MBD9072783.1	8
1845	46.8354	24.324	35	0.66	7	148	93	24324	316	235	coaA	90	133	WP_074833087.1	3
1846	46.8354	24.324	35	0.68	7	148	93	24324	316	235	coaA	90	133	WP_013065046.1	3
1847	47.1519	26.846	35	0.74	9	149	86	26846	316	234	coaA	90	137	WP_158463926.1	8
1848	46.8354	26.351	34.7	0.76	7	148	90	26351	316	235	coaA	90	133	WP_091816249.1	3
1849	46.2025	23.973	34.7	0.93	6	146	94	23973	316	234	coaA	90	136	WP_117691549.1	7
1850	46.2025	23.973	34.7	0.95	6	146	94	23973	316	234	coaA	90	136	WP_153073987.1	7
1851	46.2025	23.973	34.7	0.97	6	146	94	23973	316	234	coaA	90	143	CUP89877.1	14
1852	46.2025	23.973	34.7	1	6	146	94	23973	316	234	coaA	90	136	WP_153086359.1	7
1853	46.2025	23.973	34.3	1	6	146	94	23973	316	234	coaA	90	136	WP_144152106.1	7
1854	46.2025	23.973	34.3	1.1	6	146	94	23973	316	234	coaA	90	136	WP_117587693.1	7
1855	46.2025	23.973	34.3	1.3	6	146	94	23973	316	234	coaA	90	136	WP_153096162.1	7
1856	46.2025	23.973	34.3	1.3	6	146	94	23973	316	234	coaA	90	136	WP_118253974.1	7
1857	20.8861	34.848	33.5	2.1	2	66	40	34848	316	118	coaA	56	167	WP_082721726.1	102
1858	46.2025	23.288	32.3	4.9	6	146	95	23288	316	234	coaA	90	136	WP_153087100.1	7
1859	46.2025	23.288	32.3	5	6	146	95	23288	316	234	coaA	90	136	WP_153080807.1	7
1860	18.6709	35.593	32.7	5.8	1	59	37	35593	316	302	coaA	245	434	CCX43598.1	376
1861	31.962	27.723	32.3	5.9	4	101	61	27723	316	239	coaA	149	181	WP_028897832.1	83
1862	21.519	27.941	32.3	6.3	2	68	46	27941	316	120	coaA	56	169	MBD9041565.1	102
1863	21.519	27.941	32.3	6.6	2	68	46	27941	316	120	coaA	56	169	HAE08305.1	102
1864	63.2911	23	32.3	6.7	8	200	132	23000	316	271	coaA	83	381	WP_028898278.1	193
1865	21.519	27.941	32.3	7.1	2	68	46	27941	316	120	coaA	56	169	HAM28629.1	102
1866	34.1772	26.852	32.3	7.5	4	108	66	26852	316	302	coaA	203	422	WP_018462776.1	320
1867	16.1392	39.216	32	9.4	1	51	28	39216	316	187	coaA	140	246	WP_009011770.1	196
1868	26.8987	27.059	31.6	9.6	3	85	55	27059	316	101	coaA	21	105	CCX68667.1	24
2117	22.0126	51.429	41.6	9.53e-05	0	35	17	51429	159	37	coaD	3	36	MBD9299356.1	2
2118	112.579	26.257	41.6	0.001	7	179	100	26257	159	150	coaD	3	182	WP_094879789.1	5
2119	112.579	26.257	41.2	0.001	7	179	100	26257	159	150	coaD	3	182	MBD9246863.1	5
2120	89.3082	23.239	40.4	0.004	3	142	98	23239	159	142	coaD	1	305	CDB05674.1	175
2121	65.4088	26.923	38.1	0.024	3	104	71	26923	159	114	coaD	12	267	CDE86539.1	168
2122	33.9623	29.63	36.6	0.034	1	54	32	29630	159	56	coaD	9	67	WP_018361885.1	14
2123	70.4403	24.107	37	0.064	2	112	81	24107	159	113	coaD	2	278	WP_004335605.1	171
2124	44.0252	27.143	37	0.066	1	70	47	27143	159	72	coaD	3	67	WP_074614652.1	2
2125	44.0252	27.143	36.6	0.076	1	70	47	27143	159	72	coaD	3	67	WP_006283744.1	2
2126	70.4403	24.107	36.6	0.081	2	112	81	24107	159	113	coaD	2	278	WP_036887387.1	171
2127	70.4403	24.107	36.6	0.085	2	112	81	24107	159	113	coaD	2	278	WP_048739325.1	171
2128	70.4403	24.107	36.6	0.088	2	112	81	24107	159	113	coaD	2	278	WP_061315553.1	171
2129	41.5094	27.273	34.7	0.1	2	66	41	27273	159	60	coaD	1	65	WP_118207693.1	1
2130	70.4403	24.107	36.2	0.11	2	112	81	24107	159	113	coaD	2	278	WP_036867074.1	171
2131	70.4403	24.107	36.2	0.11	2	112	81	24107	159	113	coaD	2	278	WP_036862287.1	171
2132	70.4403	24.107	36.2	0.12	2	112	81	24107	159	113	coaD	2	278	WP_061450649.1	171
2133	114.465	23.626	35.4	0.14	7	182	97	23626	159	150	coaD	5	179	MBD9028272.1	4
2134	44.0252	25.714	35.8	0.14	1	70	48	25714	159	72	coaD	3	67	WP_036896826.1	2
2135	44.0252	25.714	35.8	0.15	1	70	48	25714	159	72	coaD	3	67	WP_062433462.1	2
2136	41.5094	27.273	34.7	0.16	2	66	41	27273	159	60	coaD	1	65	WP_144007380.1	1
2137	44.0252	24.286	35	0.25	1	70	49	24286	159	72	coaD	3	67	WP_023925749.1	2
2138	34.5912	36.364	34.7	0.26	2	55	32	36364	159	54	coaD	3	59	CDB05885.1	5
2139	44.0252	24.286	35	0.26	1	70	49	24286	159	72	coaD	3	67	WP_004366750.1	2
2140	44.0252	24.286	35	0.26	1	70	49	24286	159	72	coaD	3	67	WP_004364099.1	2
2141	44.0252	24.286	35	0.27	1	70	49	24286	159	72	coaD	3	67	WP_088401077.1	2
2142	44.0252	25.714	35	0.28	1	70	48	25714	159	72	coaD	3	67	WP_004377943.1	2
2143	44.0252	24.286	35	0.28	1	70	49	24286	159	72	coaD	3	67	WP_024997866.1	2
2144	44.0252	25.714	35	0.29	1	70	48	25714	159	72	coaD	3	67	WP_018921133.1	2
2145	44.0252	24.286	35	0.29	1	70	49	24286	159	72	coaD	3	67	WP_115082791.1	2
2146	71.0692	28.319	34.3	0.31	5	113	71	28319	159	106	coaD	1	110	WP_025883246.1	1
2147	44.0252	25.714	34.7	0.31	1	70	48	25714	159	72	coaD	3	67	WP_070667904.1	2
2148	44.0252	25.714	34.7	0.31	1	70	48	25714	159	72	coaD	3	67	WP_070693772.1	2
2149	44.6541	30.986	34.3	0.32	3	71	44	30986	159	70	coaD	5	77	WP_172206076.1	7
2150	43.3962	27.536	34.7	0.34	1	69	46	27536	159	72	coaD	4	67	WP_036925811.1	3
2151	64.1509	29.412	34.3	0.34	4	102	65	29412	159	96	coaD	1	101	WP_104405336.1	1
2152	44.0252	25.714	34.7	0.34	1	70	48	25714	159	72	coaD	3	67	WP_007134981.1	2
2153	44.0252	24.286	34.7	0.35	1	70	49	24286	159	72	coaD	3	67	WP_099977090.1	2
2154	44.0252	25.714	34.7	0.35	1	70	48	25714	159	72	coaD	3	67	WP_021825952.1	2
2155	43.3962	27.536	34.7	0.37	1	69	46	27536	159	72	coaD	4	67	WP_036866456.1	3
2156	44.0252	24.286	34.7	0.37	1	70	49	24286	159	72	coaD	3	67	WP_097549839.1	2
2157	44.0252	24.286	34.7	0.38	1	70	49	24286	159	72	coaD	3	67	WP_014709267.1	2
2158	41.5094	25.758	33.5	0.38	2	66	42	25758	159	60	coaD	1	65	WP_144007382.1	1
2159	44.0252	24.286	34.7	0.38	1	70	49	24286	159	72	coaD	3	67	WP_100021461.1	2
2160	44.0252	24.286	34.7	0.39	1	70	49	24286	159	72	coaD	3	67	WP_006043726.1	2
2161	44.0252	24.286	34.7	0.39	1	70	49	24286	159	72	coaD	3	67	WP_124140283.1	2
2162	44.0252	24.286	34.7	0.39	1	70	49	24286	159	72	coaD	3	67	WP_099835398.1	2
2163	44.0252	24.286	34.7	0.39	1	70	49	24286	159	72	coaD	3	67	WP_100189533.1	2
2164	44.0252	24.286	34.7	0.39	1	70	49	24286	159	72	coaD	3	67	WP_097656799.1	2
2165	33.9623	29.63	33.5	0.39	1	54	32	29630	159	56	coaD	9	66	WP_009227433.1	13
2166	44.0252	24.286	34.7	0.4	1	70	49	24286	159	72	coaD	3	67	WP_045166468.1	2
2167	44.6541	30.986	33.9	0.4	3	71	44	30986	159	70	coaD	5	77	WP_104368855.1	7
2168	44.0252	24.286	34.7	0.4	1	70	49	24286	159	72	coaD	3	67	WP_088438555.1	2
2169	44.0252	24.286	34.3	0.4	1	70	49	24286	159	72	coaD	3	67	WP_097647013.1	2
2170	44.0252	24.286	34.3	0.4	1	70	49	24286	159	72	coaD	3	67	WP_096405565.1	2
2171	44.0252	24.286	34.3	0.4	1	70	49	24286	159	72	coaD	3	67	WP_100328125.1	2
2172	44.0252	24.286	34.3	0.41	1	70	49	24286	159	72	coaD	3	67	WP_099983751.1	2
2173	44.0252	25.714	34.3	0.41	1	70	48	25714	159	72	coaD	3	67	MBB1530628.1	2
2174	44.0252	24.286	34.3	0.42	1	70	49	24286	159	72	coaD	3	67	WP_100370797.1	2
2175	44.0252	24.286	34.3	0.44	1	70	49	24286	159	72	coaD	3	67	WP_100356601.1	2
2176	44.0252	25.714	34.3	0.52	1	70	48	25714	159	72	coaD	3	67	WP_153090848.1	2
2177	44.0252	25.714	34.3	0.52	1	70	48	25714	159	72	coaD	3	67	RHK08644.1	2
2178	44.0252	25.714	34.3	0.52	1	70	48	25714	159	72	coaD	3	67	WP_153096664.1	2
2179	44.0252	25.714	34.3	0.52	1	70	48	25714	159	72	coaD	3	67	WP_172274623.1	2
2180	44.0252	24.286	33.9	0.57	1	70	49	24286	159	72	coaD	3	67	WP_100013595.1	2
2181	44.0252	24.286	33.9	0.57	1	70	49	24286	159	72	coaD	3	67	WP_061869318.1	2
2182	44.0252	24.286	33.9	0.59	1	70	49	24286	159	72	coaD	3	67	WP_100355995.1	2
2183	44.0252	24.286	33.9	0.6	1	70	49	24286	159	72	coaD	3	67	WP_028905480.1	2
2184	41.5094	27.273	33.9	0.61	2	66	41	27273	159	60	coaD	1	65	WP_106812566.1	1
2185	41.5094	27.273	33.9	0.65	2	66	41	27273	159	60	coaD	1	65	HAW83230.1	1
2186	57.2327	28.571	33.5	0.65	4	91	57	28571	159	83	coaD	1	91	HCD65974.1	1
2187	41.5094	27.273	33.9	0.65	2	66	41	27273	159	60	coaD	1	65	RHK45959.1	1
2188	41.5094	27.273	33.9	0.67	2	66	41	27273	159	60	coaD	1	65	WP_153080173.1	1
2189	41.5094	27.273	33.9	0.7	2	66	41	27273	159	60	coaD	1	65	WP_153081399.1	1
2190	41.5094	27.273	33.5	0.73	2	66	41	27273	159	60	coaD	1	65	WP_117729441.1	1
2191	38.3648	29.508	33.9	0.75	1	61	41	29508	159	72	coaD	12	223	WP_106811721.1	165
2192	41.5094	27.273	33.5	0.76	2	66	41	27273	159	60	coaD	1	65	WP_118207652.1	1
2193	41.5094	27.273	33.5	0.77	2	66	41	27273	159	60	coaD	1	65	RGS44804.1	1
2194	44.0252	24.286	33.5	0.78	1	70	49	24286	159	72	coaD	3	67	CCX44007.1	2
2195	21.3836	38.235	33.5	0.81	0	34	21	38235	159	36	coaD	3	35	WP_174264893.1	2
2196	22.0126	37.143	33.5	0.84	0	35	22	37143	159	37	coaD	3	42	WP_044248544.1	8
2197	22.0126	37.143	33.5	0.85	0	35	22	37143	159	37	coaD	3	42	WP_005847220.1	8
2198	83.0189	24.242	32.7	0.98	5	132	68	24242	159	125	coaD	3	113	OKZ25124.1	5
2199	54.717	27.586	32.3	0.98	3	87	55	27586	159	89	coaD	9	92	MUU05433.1	8
2200	22.6415	38.889	33.1	1.1	0	36	22	38889	159	38	coaD	3	37	WP_036872946.1	2
2201	35.8491	28.07	32.7	1.1	2	57	38	28070	159	54	coaD	1	57	CCY65606.1	1
2202	23.2704	37.838	33.1	1.2	0	37	23	37838	159	39	coaD	3	38	WP_023058574.1	2
2203	47.7987	28.947	32.7	1.2	2	76	48	28947	159	70	coaD	1	76	WP_092073697.1	1
2204	42.7673	35.294	32.7	1.2	4	68	36	35294	159	60	coaD	1	68	WP_158462934.1	1
2205	44.0252	25.714	33.1	1.2	1	70	48	25714	159	72	coaD	3	67	WP_073046487.1	2
2206	42.7673	35.294	32.7	1.2	4	68	36	35294	159	60	coaD	1	68	CDC24026.1	1
2207	44.0252	24.286	33.1	1.2	1	70	49	24286	159	72	coaD	3	67	WP_153089418.1	2
2208	83.0189	24.242	32.7	1.2	5	132	68	24242	159	125	coaD	3	110	WP_106390479.1	2
2209	42.7673	35.294	32.7	1.3	4	68	36	35294	159	60	coaD	1	68	MBD9073475.1	1
2210	44.0252	22.857	33.1	1.3	1	70	50	22857	159	72	coaD	3	67	WP_025000381.1	2
2211	22.0126	34.286	32.7	1.4	0	35	23	34286	159	37	coaD	3	46	SUB94349.1	12
2212	22.0126	34.286	32.7	1.4	0	35	23	34286	159	37	coaD	3	36	WP_036854305.1	2
2213	22.0126	34.286	32.7	1.4	0	35	23	34286	159	37	coaD	3	36	WP_025068235.1	2
2214	22.0126	34.286	32.7	1.4	0	35	23	34286	159	37	coaD	3	36	WP_013672169.1	2
2215	41.5094	27.273	32.7	1.5	2	66	41	27273	159	60	coaD	1	65	WP_094434173.1	1
2216	41.5094	27.273	32.7	1.5	2	66	41	27273	159	60	coaD	1	65	WP_094464762.1	1
2217	41.5094	27.273	32.7	1.5	2	66	41	27273	159	60	coaD	1	65	WP_118201827.1	1
2218	39.6226	34.921	32.3	1.6	3	63	36	34921	159	60	coaD	3	67	MBD8937390.1	5
2219	39.6226	33.333	32.3	1.6	2	63	37	33333	159	60	coaD	3	67	WP_007902124.1	5
2220	41.5094	27.273	32.7	1.6	2	66	41	27273	159	60	coaD	1	65	WP_094447153.1	1
2221	41.5094	27.273	32.7	1.6	2	66	41	27273	159	60	coaD	1	65	WP_094440825.1	1
2222	34.5912	27.273	30.4	1.7	2	55	33	27273	159	49	coaD	1	54	WP_147380082.1	1
2223	88.0503	24.286	32	1.8	6	140	70	24286	159	129	coaD	1	115	WP_028911039.1	1
2224	48.4277	33.766	32	1.8	4	77	43	33766	159	72	coaD	1	74	WP_091959879.1	1
2225	89.3082	21.127	32	1.8	5	142	92	21127	159	139	coaD	1	125	WP_028906416.1	1
2226	39.6226	34.921	32	1.9	3	63	36	34921	159	60	coaD	3	67	WP_118355533.1	5
2227	23.2704	35.135	32.3	1.9	0	37	24	35135	159	39	coaD	3	38	MBB1538437.1	2
2228	41.5094	25.758	32.3	2	2	66	42	25758	159	60	coaD	1	99	WP_153112585.1	35
2229	25.7862	39.024	32	2	1	41	22	39024	159	43	coaD	6	45	CDE07197.1	5
2230	16.9811	44.444	32	2	0	27	15	44444	159	28	coaD	2	30	WP_044080750.1	4
2231	39.6226	30.159	32	2	2	63	41	30159	159	60	coaD	1	63	WP_102696203.1	1
2232	44.0252	27.143	32	2.1	3	70	46	27143	159	65	coaD	1	70	WP_091840937.1	1
2233	23.2704	35.135	32.3	2.2	0	37	24	35135	159	39	coaD	3	38	MBB1550278.1	2
2234	81.761	25.385	32.3	2.4	5	130	72	25385	159	140	coaD	36	367	WP_025001615.1	238
2235	45.9119	28.767	31.6	2.5	3	73	47	28767	159	70	coaD	3	77	HCD76891.1	5
2236	60.3774	28.125	31.6	2.5	4	96	61	28125	159	91	coaD	1	93	CDE85957.1	1
2237	37.7358	26.667	31.6	2.7	2	60	36	26667	159	54	coaD	3	159	WP_153138513.1	100
2238	37.7358	26.667	32	2.7	2	60	36	26667	159	54	coaD	3	397	WP_153081522.1	338
2239	41.5094	25.758	32	2.9	2	66	42	25758	159	60	coaD	1	65	WP_118154984.1	1
2240	41.5094	24.242	32	3	2	66	43	24242	159	60	coaD	1	65	WP_134844665.1	1
2241	22.6415	36.111	32	3	0	36	23	36111	159	38	coaD	3	37	WP_027450559.1	2
2242	81.761	25.385	32	3	5	130	72	25385	159	140	coaD	36	367	WP_028906101.1	238
2243	81.761	25.385	32	3	5	130	72	25385	159	140	coaD	36	367	WP_099891405.1	238
2244	22.6415	36.111	32	3.1	0	36	23	36111	159	38	coaD	3	37	WP_027454655.1	2
2245	43.3962	26.087	32	3.2	1	69	47	26087	159	72	coaD	4	67	WP_018463594.1	3
2246	81.761	25.385	31.6	3.3	5	130	72	25385	159	140	coaD	36	367	WP_045167085.1	238
2247	18.8679	40	32	3.4	0	30	18	40000	159	31	coaD	2	593	HCN53887.1	564
2248	81.761	25.385	31.6	3.4	5	130	72	25385	159	140	coaD	36	367	WP_023925383.1	238
2249	13.8365	59.091	31.2	3.5	0	22	9	59091	159	24	coaD	3	26	CDE33788.1	5
2250	22.6415	36.111	31.6	3.7	0	36	23	36111	159	39	coaD	4	38	WP_021590786.1	3
2251	121.384	22.28	31.2	3.7	9	193	99	22280	159	152	coaD	1	183	CCZ12647.1	1
2252	44.6541	26.761	31.2	3.9	2	71	47	26761	159	70	coaD	5	74	WP_006951995.1	4
2253	22.6415	36.111	31.6	3.9	0	36	23	36111	159	39	coaD	4	38	WP_027444954.1	3
2254	42.7673	27.941	31.2	3.9	2	68	40	27941	159	132	coaD	74	68	WP_027454410.1	1
2255	26.4151	38.095	31.6	4.1	0	42	26	38095	159	59	coaD	18	367	WP_036866270.1	326
2256	26.4151	38.095	31.6	4.2	0	42	26	38095	159	59	coaD	18	367	WP_036924480.1	326
2257	94.3396	22.667	31.2	4.2	5	150	80	22667	159	139	coaD	1	125	WP_033150268.1	1
2258	26.4151	38.095	31.2	4.2	0	42	26	38095	159	59	coaD	18	367	WP_120174636.1	326
2259	26.4151	38.095	31.2	4.3	0	42	26	38095	159	59	coaD	18	367	WP_025838214.1	326
2260	26.4151	38.095	31.2	4.4	0	42	26	38095	159	59	coaD	18	367	WP_013264805.1	326
2261	41.5094	25.758	31.2	4.5	2	66	42	25758	159	60	coaD	1	65	MBD9271306.1	1
2262	22.0126	34.286	31.2	4.6	0	35	23	34286	159	37	coaD	3	36	WP_104369652.1	2
2263	94.3396	22	30.8	5	5	150	81	22000	159	139	coaD	1	125	WP_074760100.1	1
2264	94.3396	22	30.8	5	5	150	81	22000	159	139	coaD	1	125	WP_013065028.1	1
2265	94.3396	22	30.8	5	5	150	81	22000	159	139	coaD	1	125	WP_091860668.1	1
2266	41.5094	27.273	30.8	5.4	1	66	46	27273	159	64	coaD	1	66	WP_036874233.1	1
2267	37.1069	30.508	30.8	5.4	2	59	36	30508	159	58	coaD	5	62	WP_006947796.1	4
2268	40.2516	26.563	31.2	5.7	2	64	40	26563	159	60	coaD	3	67	MQM91820.1	5
2269	81.761	25.385	30.8	5.9	5	130	72	25385	159	140	coaD	36	367	WP_099983376.1	238
2270	23.2704	40.541	30.8	6.2	0	37	22	40541	159	54	coaD	18	362	HBN46931.1	326
2271	121.384	22.28	30.4	6.2	9	193	99	22280	159	152	coaD	1	183	MBD9229617.1	1
2272	41.5094	25.758	30.8	6.4	2	66	42	25758	159	60	coaD	1	65	WP_153089504.1	1
2273	16.9811	40.741	30.4	6.5	0	27	16	40741	159	28	coaD	2	30	WP_044073050.1	4
2274	41.5094	25.758	30.8	6.6	2	66	42	25758	159	60	coaD	1	65	WP_118118966.1	1
2275	16.9811	40.741	30.4	6.7	0	27	16	40741	159	28	coaD	2	30	WP_044066162.1	4
2276	94.3396	21.333	30.4	6.7	6	150	82	21333	159	139	coaD	1	125	WP_033147470.1	1
2277	41.5094	25.758	30.8	6.8	2	66	42	25758	159	60	coaD	1	65	WP_153089552.1	1
2278	16.9811	40.741	30.4	7.4	0	27	16	40741	159	28	coaD	2	30	CDD04145.1	4
2279	16.9811	40.741	30.4	7.4	0	27	16	40741	159	28	coaD	2	30	WP_042520179.1	4
2280	23.2704	40.541	30.8	7.6	0	37	22	40541	159	54	coaD	18	362	WP_155715520.1	326
2281	16.9811	40.741	30.4	7.7	0	27	16	40741	159	28	coaD	2	30	WP_044074666.1	4
2282	35.8491	31.579	30	7.7	2	57	36	31579	159	54	coaD	1	57	WP_073207813.1	1
2283	23.2704	40.541	30.4	7.9	0	37	22	40541	159	54	coaD	18	362	WP_009434827.1	326
2284	23.8994	34.211	30.4	8.1	0	38	25	34211	159	151	coaD	114	303	WP_094446487.1	266
2285	67.9245	26.852	30.4	8.2	4	108	70	26852	159	124	coaD	22	331	WP_091914703.1	228
2286	23.8994	34.211	30.4	8.3	0	38	25	34211	159	151	coaD	114	303	WP_094390914.1	266
2287	81.761	24.615	30.4	8.5	5	130	73	24615	159	140	coaD	36	367	WP_100018759.1	238
2288	39.6226	28.571	30	8.6	2	63	40	28571	159	58	coaD	1	63	WP_102189054.1	1
2289	23.8994	34.211	30.4	8.7	0	38	25	34211	159	151	coaD	114	303	WP_094435912.1	266
2290	39.6226	28.571	30	8.7	2	63	40	28571	159	58	coaD	1	63	WP_036927605.1	1
2291	28.9308	28.261	30	8.7	1	46	31	28261	159	44	coaD	1	46	WP_023057329.1	1
2292	45.9119	30.137	30	8.8	3	73	45	30137	159	67	coaD	1	73	WP_094401369.1	1
2293	39.6226	28.571	30	9.4	2	63	40	28571	159	58	coaD	1	63	WP_103003591.1	1
2294	39.6226	28.571	30	9.4	2	63	40	28571	159	58	coaD	1	63	WP_008124987.1	1
2295	94.3396	22.667	30	9.6	5	150	80	22667	159	139	coaD	1	125	WP_073044424.1	1
2296	41.5094	25.758	30.4	9.8	2	66	42	25758	159	60	coaD	1	65	WP_118313417.1	1
2297	116.981	20.968	30	10	6	186	112	20968	159	157	coaD	5	187	WP_029906389.1	4
2298	78.6885	33.333	29.6	1.4	0	48	32	33333	61	55	csrA	8	357	WP_107582381.1	310
2299	70.4918	34.884	28.5	3.7	0	43	28	34884	61	55	csrA	13	353	WP_018462444.1	311
2300	77.0492	34.043	27.3	9.3	0	47	31	34043	61	59	csrA	13	357	WP_019968266.1	311
2562	8.42912	59.091	52.4	9.2e-08	1	44	14	59091	522	40	cydA	1	48	MQO97037.1	5
2791	37.9947	27.778	63.2	1.11e-09	1	144	103	27778	379	147	cydB	4	145	WP_074760414.1	3
2792	27.9683	31.132	62.8	1.67e-09	1	106	72	31132	379	109	cydB	4	107	WP_036887026.1	3
2793	27.9683	31.132	62.8	1.67e-09	1	106	72	31132	379	109	cydB	4	107	WP_004336515.1	3
2794	27.9683	29.245	62.4	2.21e-09	1	106	74	29245	379	109	cydB	4	107	WP_004361158.1	3
2795	37.9947	27.778	62.4	2.44e-09	1	144	103	27778	379	147	cydB	4	145	WP_028908331.1	3
2796	37.9947	27.083	62	3.37e-09	1	144	104	27083	379	147	cydB	4	145	WP_073043122.1	3
2797	105.541	23.5	61.6	4.39e-09	15	400	257	23500	379	377	cydB	4	379	WP_018910072.1	3
2798	27.9683	30.189	61.2	4.84e-09	1	106	73	30189	379	109	cydB	4	107	WP_008823051.1	3
2799	27.9683	28.302	61.2	5.85e-09	1	106	75	28302	379	109	cydB	4	107	WP_025839344.1	3
2800	27.9683	28.302	59.3	2.04e-08	1	106	75	28302	379	109	cydB	4	107	WP_021673089.1	3
2801	28.2322	30.841	58.9	2.93e-08	1	107	73	30841	379	110	cydB	4	108	WP_091851651.1	3
2802	27.9683	28.302	58.2	4.96e-08	1	106	75	28302	379	109	cydB	4	107	WP_025067412.1	3
2803	27.9683	29.245	58.2	5.14e-08	1	106	74	29245	379	109	cydB	4	107	WP_004353405.1	3
2804	27.9683	28.302	58.2	5.24e-08	1	106	75	28302	379	109	cydB	4	107	WP_036854126.1	3
2805	27.9683	28.302	58.2	5.28e-08	1	106	75	28302	379	109	cydB	4	107	WP_013671201.1	3
2806	27.9683	29.245	58.2	5.63e-08	1	106	74	29245	379	109	cydB	4	107	WP_118865628.1	3
2807	27.9683	28.302	58.2	6.15e-08	1	106	75	28302	379	109	cydB	4	107	WP_007368417.1	3
2808	89.7098	25.588	56.2	1.8e-07	13	340	196	25588	379	373	cydB	64	315	MBD9272109.1	3
2809	16.8865	35.938	43.1	0.003	3	64	37	35938	379	377	cydB	316	284	CCY15973.1	223
2810	81.5303	22.654	42.7	0.004	11	309	190	22654	379	373	cydB	91	286	CDA66351.1	1
2811	21.8997	33.735	38.1	0.021	4	83	50	33735	379	377	cydB	297	92	CDF21829.1	13
2812	20.5805	32.051	37.4	0.023	3	78	50	32051	379	373	cydB	297	78	EFC76881.1	3
2813	15.5673	33.898	37	0.028	2	59	37	33898	379	373	cydB	316	71	WP_048798319.1	14
2814	83.1135	23.492	38.9	0.066	11	315	207	23492	379	373	cydB	82	304	MBD9015803.1	1
2815	48.5488	29.348	37.7	0.09	6	184	113	29348	379	362	cydB	184	174	CDA46177.1	3
2816	13.1926	38	33.9	0.7	2	50	29	38000	379	365	cydB	316	112	MBD9201217.1	65
2817	12.4011	36.17	32.3	4.7	1	47	29	36170	379	362	cydB	316	153	CCY64697.1	108
2818	27.7045	27.619	33.5	5	6	105	51	27619	379	155	cydB	55	465	WP_100014679.1	382
2819	27.7045	27.619	32.7	7	6	105	51	27619	379	155	cydB	55	465	WP_099892599.1	382
2820	27.7045	27.619	32.7	7.3	6	105	51	27619	379	155	cydB	55	465	WP_100016046.1	382
2821	27.7045	27.619	32.7	7.5	6	105	51	27619	379	155	cydB	55	465	WP_100371292.1	382
2822	27.7045	27.619	32.7	7.7	6	105	51	27619	379	155	cydB	55	465	WP_096408381.1	382
2823	27.7045	27.619	32.7	7.7	6	105	51	27619	379	155	cydB	55	465	WP_112200326.1	382
2824	62.1622	56.522	26.9	4.7	1	23	9	56522	37	29	cydX	8	28	SDG71972.1	6
2825	59.4595	40.909	26.6	6.3	0	22	13	40909	37	34	cydX	13	1701	RHL42352.1	1680
2826	59.4595	40.909	26.6	6.3	0	22	13	40909	37	34	cydX	13	1726	WP_147381626.1	1705
2827	59.4595	40.909	26.2	8.9	0	22	13	40909	37	34	cydX	13	1702	MBD9085975.1	1681
3049	44.3223	34.711	58.2	2.09e-09	3	121	73	34711	273	268	dapB	153	128	CCY64357.1	9
3050	21.978	30	39.7	0.033	0	60	42	30000	273	78	dapB	19	842	WP_074803182.1	783
3051	21.978	30	38.1	0.066	0	60	42	30000	273	78	dapB	19	310	WP_039870834.1	251
3052	21.978	30	38.1	0.066	0	60	42	30000	273	78	dapB	19	295	EFI71579.1	236
3053	21.2454	36.207	35	0.098	1	58	36	36207	273	268	dapB	211	71	MQO97746.1	15
3054	30.0366	32.927	34.7	0.99	2	82	47	32927	273	111	dapB	37	93	WP_125234251.1	13
3055	23.0769	36.508	33.9	1.6	2	63	32	36508	273	92	dapB	37	74	WP_025799857.1	13
3056	36.2637	25.253	33.9	1.9	2	99	70	25253	273	154	dapB	59	138	WP_053398283.1	41
3057	18.6813	39.216	33.5	2.2	2	51	29	39216	273	120	dapB	71	97	CCY82725.1	48
3058	34.7985	33.684	32.7	3.9	5	95	50	33684	273	107	dapB	15	112	WP_094379316.1	29
3059	32.967	27.778	32.3	5	3	90	43	27778	273	265	dapB	198	120	WP_024997999.1	31
3060	49.8168	28.676	32.3	6	6	136	72	28676	273	119	dapB	3	218	WP_094389656.1	89
3061	27.8388	36.842	32.3	6	4	76	38	36842	273	108	dapB	33	113	WP_021583207.1	48
3062	35.1648	31.25	32	7.6	4	96	54	31250	273	107	dapB	12	112	WP_091960890.1	29
3063	62.2711	21.765	32	8.8	5	170	113	21765	273	216	dapB	54	197	WP_021672871.1	41
3064	35.1648	32.292	31.6	9.2	5	96	53	32292	273	107	dapB	12	114	KOO69322.1	31
3065	35.1648	32.292	31.6	9.6	5	96	53	32292	273	107	dapB	12	114	CCX69177.1	31
3066	35.1648	32.292	31.6	9.7	5	96	53	32292	273	107	dapB	12	112	WP_082335147.1	29
3067	43.0657	28.814	45.1	0.00023	4	118	64	28814	274	210	dapD	105	203	WP_118201616.1	94
3068	33.5766	29.348	43.9	0.000587	1	92	57	29348	274	213	dapD	122	195	WP_074762147.1	112
3069	43.0657	27.966	43.9	0.000676	4	118	65	27966	274	210	dapD	105	204	WP_089542534.1	95
3070	28.8321	29.114	40	0.003	1	79	55	29114	274	215	dapD	138	80	KOO65775.1	2
3071	33.9416	33.333	40	0.009	5	93	50	33333	274	229	dapD	145	140	WP_091842982.1	52
3072	33.9416	34.409	40	0.01	5	93	49	34409	274	229	dapD	145	140	WP_073207184.1	52
3073	33.9416	33.333	39.7	0.012	5	93	50	33333	274	229	dapD	145	140	WP_036909923.1	52
3074	33.9416	33.333	39.7	0.012	5	93	50	33333	274	229	dapD	145	140	WP_074762335.1	52
3075	51.8248	30.986	40.4	0.012	6	142	68	30986	274	210	dapD	78	287	WP_102698202.1	167
3076	33.9416	33.333	39.7	0.013	5	93	50	33333	274	229	dapD	145	144	SEH57117.1	56
3077	33.9416	33.333	39.7	0.013	5	93	50	33333	274	229	dapD	145	140	WP_028906894.1	52
3078	33.9416	33.333	39.7	0.014	5	93	50	33333	274	229	dapD	145	140	WP_013064589.1	52
3079	33.9416	33.333	39.3	0.014	5	93	50	33333	274	229	dapD	145	140	WP_073046871.1	52
3080	40.146	31.818	40.4	0.015	6	110	50	31818	274	203	dapD	117	480	WP_153098732.1	373
3081	40.146	31.818	40.4	0.015	6	110	50	31818	274	203	dapD	117	481	WP_153079630.1	374
3082	33.9416	34.409	39.7	0.02	4	93	46	34409	274	210	dapD	129	287	WP_036871094.1	199
3083	43.4307	26.891	40	0.021	5	119	63	26891	274	216	dapD	113	393	CCY65385.1	284
3084	33.9416	33.333	38.9	0.024	5	93	50	33333	274	229	dapD	145	140	WP_027448945.1	52
3085	33.9416	34.409	39.7	0.025	4	93	46	34409	274	210	dapD	129	287	WP_023057732.1	199
3086	43.0657	25.424	39.3	0.025	4	118	68	25424	274	210	dapD	105	205	WP_158464229.1	96
3087	33.9416	34.409	39.7	0.025	4	93	46	34409	274	210	dapD	129	287	WP_004350505.1	199
3088	33.9416	32.258	38.5	0.027	5	93	51	32258	274	229	dapD	145	140	WP_028902396.1	52
3089	60.5839	22.289	39.7	0.027	8	166	104	22289	274	216	dapD	57	398	WP_172184252.1	252
3090	33.9416	32.258	38.5	0.032	5	93	51	32258	274	229	dapD	145	140	WP_033149483.1	52
3091	33.9416	32.258	38.5	0.033	5	93	51	32258	274	229	dapD	145	140	WP_028911641.1	52
3092	35.0365	31.25	39.3	0.034	4	96	51	31250	274	213	dapD	129	289	WP_074613977.1	198
3093	35.0365	31.25	39.3	0.035	4	96	51	31250	274	213	dapD	129	289	WP_027454188.1	198
3094	35.0365	31.25	39.3	0.035	4	96	51	31250	274	213	dapD	129	289	WP_094448203.1	198
3095	35.0365	31.25	38.9	0.036	4	96	51	31250	274	213	dapD	129	289	WP_173651827.1	198
3096	35.0365	31.25	38.9	0.036	4	96	51	31250	274	213	dapD	129	289	WP_006281249.1	198
3097	31.7518	28.736	38.5	0.037	2	87	50	28736	274	208	dapD	134	175	WP_172178128.1	89
3098	35.0365	31.25	38.9	0.038	4	96	51	31250	274	213	dapD	129	289	WP_074548650.1	198
3099	35.4015	32.99	38.9	0.047	3	97	54	32990	274	213	dapD	128	292	WP_007575609.1	196
3100	36.8613	30.693	38.5	0.055	3	101	60	30693	274	205	dapD	113	382	WP_117726927.1	284
3101	36.1314	24.242	37.4	0.056	3	99	65	24242	274	215	dapD	127	143	WP_153089073.1	45
3102	53.2847	26.027	38.1	0.056	6	146	72	26027	274	239	dapD	97	196	QIM10118.1	84
3103	36.1314	24.242	37.7	0.056	3	99	65	24242	274	215	dapD	127	155	MQN35934.1	57
3104	41.2409	25.664	38.5	0.066	4	113	70	25664	274	215	dapD	113	396	WP_006281811.1	288
3105	33.9416	32.258	37.4	0.067	5	93	51	32258	274	229	dapD	145	140	WP_091915827.1	52
3106	31.3869	30.233	37.4	0.069	4	86	50	30233	274	229	dapD	147	140	WP_033148359.1	62
3107	37.9562	31.731	38.1	0.073	5	104	52	31731	274	218	dapD	130	298	WP_024990405.1	199
3108	39.781	29.358	37	0.076	5	109	54	29358	274	203	dapD	117	122	WP_153131805.1	15
3109	33.9416	32.258	37	0.085	5	93	51	32258	274	229	dapD	145	140	WP_091902236.1	52
3110	39.781	29.358	37.4	0.087	5	109	54	29358	274	203	dapD	117	153	MQN07669.1	46
3111	35.7664	31.633	37.4	0.092	2	98	49	31633	274	211	dapD	132	169	WP_172276447.1	72
3112	36.1314	24.242	37	0.093	3	99	65	24242	274	215	dapD	127	159	WP_153129034.1	61
3113	30.6569	30.952	37.7	0.099	3	84	45	30952	274	208	dapD	134	275	WP_094385178.1	196
3114	30.6569	30.952	37.7	0.11	3	84	45	30952	274	208	dapD	134	297	CDC98187.1	218
3115	30.6569	30.952	37.7	0.11	3	84	45	30952	274	208	dapD	134	275	WP_094388068.1	196
3116	41.6058	26.316	37.7	0.12	4	114	70	26316	274	216	dapD	113	393	WP_172271962.1	284
3117	37.5912	31.068	36.6	0.14	4	103	47	31068	274	211	dapD	133	185	MBD8937710.1	83
3118	37.9562	30.769	37	0.15	4	104	53	30769	274	218	dapD	130	297	CCY03022.1	198
3119	37.2263	28.431	37	0.21	6	102	57	28431	274	205	dapD	115	382	WP_036865601.1	286
3120	32.4818	29.213	36.2	0.29	3	89	50	29213	274	213	dapD	134	287	WP_172275034.1	203
3121	34.6715	27.368	35.4	0.3	4	95	55	27368	274	215	dapD	131	137	WP_051523011.1	47
3122	12.4088	47.059	35.8	0.33	0	34	18	47059	274	205	dapD	172	192	HBJ04690.1	159
3123	44.5255	26.23	35.4	0.35	3	122	70	26230	274	214	dapD	105	208	WP_130830462.1	95
3124	30.6569	29.762	35.8	0.35	3	84	46	29762	274	208	dapD	134	275	WP_094422970.1	196
3125	31.3869	27.907	35	0.36	3	86	52	27907	274	229	dapD	147	140	WP_091814101.1	62
3126	30.6569	29.762	35.8	0.39	3	84	46	29762	274	208	dapD	134	275	HAG31961.1	196
3127	34.6715	29.474	35.8	0.41	3	95	52	29474	274	213	dapD	130	289	WP_028908976.1	199
3128	50.7299	25.899	35	0.44	5	139	76	25899	274	208	dapD	95	167	CDE06592.1	31
3129	37.2263	30.392	35.4	0.5	5	102	55	30392	274	213	dapD	123	289	WP_024990849.1	193
3130	37.2263	30.392	35.4	0.52	5	102	55	30392	274	213	dapD	123	290	EFM01739.1	194
3131	24.8175	29.412	35	0.53	1	68	32	29412	274	202	dapD	151	176	WP_029903693.1	109
3132	15.3285	33.333	34.7	0.54	0	42	28	33333	274	215	dapD	174	160	MBD9299153.1	119
3133	39.4161	31.481	35.4	0.58	5	108	55	31481	274	221	dapD	129	304	CDA94686.1	201
3134	39.4161	31.481	34.7	0.6	6	108	53	31481	274	203	dapD	117	134	WP_153097065.1	27
3135	44.5255	27.049	35	0.64	5	122	73	27049	274	218	dapD	108	295	WP_008447064.1	179
3136	35.7664	27.551	35	0.75	4	98	54	27551	274	218	dapD	134	297	WP_172176289.1	204
3137	37.2263	31.373	35	0.77	5	102	50	31373	274	214	dapD	129	294	WP_094398509.1	197
3138	15.3285	33.333	34.3	0.79	0	42	28	33333	274	215	dapD	174	160	CDD20519.1	119
3139	35.4015	34.021	34.3	0.81	4	97	51	34021	274	194	dapD	101	182	CDD04671.1	96
3140	46.3504	26.772	34.3	0.86	6	127	81	26772	274	229	dapD	109	174	WP_172182928.1	54
3141	44.5255	26.23	34.7	0.9	5	122	74	26230	274	218	dapD	108	295	WP_019035450.1	179
3142	16.7883	30.435	34.3	0.9	0	46	32	30435	274	215	dapD	170	156	WP_172180884.1	111
3143	12.4088	44.118	34.3	0.91	0	34	19	44118	274	205	dapD	172	190	WP_118191117.1	157
3144	36.8613	27.723	34.3	0.94	2	101	59	27723	274	205	dapD	119	162	CDF21528.1	62
3145	34.3066	26.596	34.7	0.98	3	94	56	26596	274	218	dapD	134	292	WP_094383838.1	203
3146	60.5839	22.892	34.7	0.99	7	166	103	22892	274	239	dapD	87	175	CDE41036.1	22
3147	34.6715	31.579	34.7	1	4	95	50	31579	274	213	dapD	130	287	MBA7487561.1	197
3148	33.9416	26.882	33.9	1	4	93	56	26882	274	229	dapD	145	140	WP_092073893.1	52
3149	37.9562	31.731	34.3	1.1	5	104	52	31731	274	218	dapD	130	298	WP_004345684.1	199
3150	37.9562	31.731	34.3	1.1	5	104	52	31731	274	218	dapD	130	298	WP_039857169.1	199
3151	37.9562	31.731	34.3	1.2	5	104	52	31731	274	218	dapD	130	293	EFC76975.1	194
3152	34.6715	30.526	34.3	1.2	4	95	51	30526	274	213	dapD	130	289	WP_023984937.1	199
3153	37.9562	31.731	34.3	1.2	5	104	52	31731	274	218	dapD	130	293	SUB79532.1	194
3154	34.6715	30.526	34.3	1.2	4	95	51	30526	274	213	dapD	130	289	WP_004367964.1	199
3155	16.7883	34.783	33.9	1.2	0	46	30	34783	274	215	dapD	170	150	CCX70260.1	105
3156	33.9416	31.183	34.3	1.2	4	93	49	31183	274	210	dapD	129	286	WP_091819670.1	198
3157	21.8978	26.667	33.5	1.3	0	60	44	26667	274	202	dapD	143	146	RHK47944.1	87
3158	34.6715	31.579	34.3	1.4	4	95	50	31579	274	213	dapD	130	287	MBB1538293.1	197
3159	32.4818	28.09	34.3	1.4	3	89	51	28090	274	213	dapD	134	287	WP_094381957.1	203
3160	34.6715	31.579	34.3	1.4	4	95	50	31579	274	213	dapD	130	287	MBB1530245.1	197
3161	36.4964	25	33.5	1.6	3	100	62	25000	274	211	dapD	125	164	WP_029902798.1	65
3162	33.5766	25	33.5	1.8	2	92	57	25000	274	210	dapD	119	177	WP_028912553.1	98
3163	40.5109	25.225	33.1	1.8	3	111	67	25225	274	224	dapD	126	168	WP_172203955.1	62
3164	37.2263	29.412	33.9	1.9	3	102	62	29412	274	203	dapD	108	581	CCX67660.1	484
3165	30.6569	30.952	33.5	2.1	3	84	45	30952	274	208	dapD	134	284	MBD9059641.1	205
3166	43.4307	25.21	33.1	2.1	4	119	74	25210	274	229	dapD	111	188	WP_094388748.1	85
3167	38.3212	26.667	32.7	2.1	3	105	63	26667	274	215	dapD	125	117	CDA95594.1	13
3168	31.3869	29.07	33.1	2.1	3	86	51	29070	274	229	dapD	147	140	WP_094391119.1	62
3169	31.3869	29.07	33.1	2.2	3	86	51	29070	274	229	dapD	147	140	WP_094464145.1	62
3170	33.5766	30.435	33.5	2.2	4	92	49	30435	274	210	dapD	130	286	WP_062432659.1	199
3171	36.8613	26.733	33.1	2.2	3	101	54	26733	274	229	dapD	143	164	WP_172345194.1	70
3172	47.0803	29.457	33.5	2.3	6	129	72	29457	274	211	dapD	97	286	MBD9027790.1	163
3173	36.1314	29.293	33.5	2.3	4	99	55	29293	274	217	dapD	130	294	RKW60984.1	200
3174	47.0803	29.457	33.5	2.4	6	129	72	29457	274	211	dapD	97	286	MBD9036209.1	163
3175	33.5766	30.435	33.5	2.4	4	92	49	30435	274	210	dapD	130	286	WP_036895836.1	199
3176	15.6934	30.233	30.8	2.4	0	43	30	30233	274	215	dapD	173	50	MQN27644.1	8
3177	13.1387	36.111	30.8	2.4	0	36	23	36111	274	205	dapD	170	37	WP_134844155.1	2
3178	15.3285	33.333	32.7	2.6	0	42	28	33333	274	215	dapD	174	160	WP_158464219.1	119
3179	16.0584	34.091	33.1	2.6	1	44	27	34091	274	218	dapD	175	208	CCX67652.1	167
3180	36.8613	26.733	32.7	2.7	3	101	54	26733	274	229	dapD	143	157	NPE25729.1	63
3181	33.5766	25	32.7	2.7	2	92	57	25000	274	210	dapD	119	177	WP_073206255.1	98
3182	36.1314	28.283	33.1	2.8	3	99	56	28283	274	217	dapD	130	294	WP_025798861.1	200
3183	45.9854	26.984	33.1	2.9	4	126	77	26984	274	221	dapD	109	228	WP_092072930.1	105
3184	29.562	29.63	32.7	3	2	81	50	29630	274	205	dapD	132	124	KIP58361.1	44
3185	14.9635	34.146	32.7	3	0	41	27	34146	274	215	dapD	175	158	WP_118118081.1	118
3186	35.7664	27.551	33.1	3.1	4	98	54	27551	274	218	dapD	134	298	WP_089544906.1	205
3187	29.1971	26.25	32.7	3.1	1	80	47	26250	274	211	dapD	144	178	WP_094381109.1	99
3188	31.3869	27.907	33.1	3.1	3	86	49	27907	274	210	dapD	134	306	CCY80720.1	225
3189	35.7664	27.551	33.1	3.3	4	98	54	27551	274	218	dapD	134	298	WP_118311040.1	205
3190	35.7664	27.551	33.1	3.3	4	98	54	27551	274	218	dapD	134	298	MBD9016356.1	205
3191	21.8978	28.333	32.3	3.3	1	60	41	28333	274	205	dapD	146	151	WP_154482341.1	94
3192	15.3285	33.333	32.3	3.5	0	42	28	33333	274	216	dapD	175	160	WP_117729099.1	119
3193	50.7299	27.338	32.7	3.7	7	139	78	27338	274	217	dapD	97	298	WP_009161943.1	165
3194	75.1825	26.214	32.7	3.8	9	206	116	26214	274	261	dapD	87	204	CDA44751.1	4
3195	60.9489	24.551	32.3	3.8	6	167	92	24551	274	232	dapD	81	156	CDD01317.1	9
3196	15.3285	33.333	32.3	4	0	42	28	33333	274	215	dapD	174	158	EHJ40809.1	117
3197	31.3869	27.907	32	4.2	3	86	52	27907	274	229	dapD	147	140	WP_091961507.1	62
3198	15.3285	33.333	32	4.2	0	42	28	33333	274	215	dapD	174	131	WP_157591636.1	90
3199	31.3869	27.907	32.3	4.2	2	86	57	27907	274	202	dapD	122	154	WP_094465488.1	69
3200	37.5912	32.039	32.7	4.3	6	103	50	32039	274	221	dapD	130	291	GAY30954.1	198
3201	39.4161	28.704	32	4.4	5	108	56	28704	274	203	dapD	117	134	WP_117664348.1	27
3202	32.8467	32.222	32.7	4.4	4	90	46	32222	274	208	dapD	130	282	MBB1551314.1	197
3203	37.9562	31.731	32.3	4.4	6	104	51	31731	274	221	dapD	129	268	WP_172486281.1	174
3204	39.781	25.688	32.3	4.6	2	109	46	25688	274	211	dapD	118	194	EHO73868.1	106
3205	39.781	25.688	32.3	4.7	2	109	46	25688	274	211	dapD	118	191	WP_155814592.1	103
3206	35.0365	30.208	32.3	4.8	4	96	52	30208	274	213	dapD	129	289	OKZ25666.1	198
3207	35.0365	30.208	32.3	5.3	4	96	52	30208	274	213	dapD	129	289	WP_068857057.1	198
3208	30.6569	29.762	32.3	5.3	3	84	46	29762	274	208	dapD	134	284	WP_153122419.1	205
3209	35.4015	27.835	32.3	5.4	4	97	53	27835	274	217	dapD	134	297	WP_018968105.1	205
3210	34.3066	28.723	32.3	5.9	4	94	60	28723	274	122	dapD	33	272	WP_036879310.1	182
3211	31.3869	24.419	31.6	5.9	2	86	60	24419	274	202	dapD	122	156	SEF62261.1	71
3212	41.2409	30.088	32.3	6	6	113	65	30088	274	215	dapD	113	392	WP_006951098.1	284
3213	31.3869	24.419	31.6	6	2	86	60	24419	274	202	dapD	122	154	WP_036914092.1	69
3214	32.4818	24.719	32	6.2	3	89	54	24719	274	213	dapD	134	290	WP_036876094.1	206
3215	49.2701	25.926	31.6	6.6	5	135	72	25926	274	271	dapD	151	173	WP_074833955.1	53
3216	24.4526	35.821	30.4	6.6	2	67	34	35821	274	205	dapD	139	58	GAY29774.1	1
3217	15.3285	33.333	31.6	6.7	0	42	28	33333	274	215	dapD	174	158	WP_156145390.1	117
3218	14.9635	34.146	31.6	6.7	0	41	27	34146	274	215	dapD	175	160	CDD04856.1	120
3219	37.9562	27.885	32	6.8	4	104	60	27885	274	222	dapD	130	299	WP_018463783.1	200
3220	14.9635	34.146	31.6	6.9	0	41	27	34146	274	215	dapD	175	160	KIP61767.1	120
3221	35.0365	30.208	32	6.9	4	96	52	30208	274	213	dapD	129	289	CCZ14681.1	198
3222	33.5766	32.609	32	7	4	92	47	32609	274	210	dapD	130	288	HCN54293.1	201
3223	56.2044	27.922	32.3	7	8	154	71	27922	274	273	dapD	138	221	WP_156104761.1	90
3224	20.8029	35.088	31.6	7	1	57	35	35088	274	215	dapD	161	125	WP_119250444.1	69
3225	31.3869	26.744	31.6	7.2	2	86	58	26744	274	202	dapD	122	157	HBI99460.1	72
3226	17.8832	40.816	31.6	7.2	1	49	28	40816	274	201	dapD	153	157	WP_007367148.1	110
3227	15.3285	33.333	31.6	7.2	0	42	28	33333	274	215	dapD	174	158	WP_156132478.1	117
3228	34.3066	25.532	32	7.4	3	94	65	25532	274	200	dapD	109	98	WP_029903745.1	8
3229	31.3869	26.744	31.6	7.4	2	86	58	26744	274	202	dapD	122	157	MBD9056782.1	72
3230	42.3358	22.414	32	7.4	4	116	77	22414	274	274	dapD	167	291	WP_025065835.1	181
3231	15.3285	30.952	31.6	7.7	0	42	29	30952	274	215	dapD	174	156	MBD9261451.1	115
3232	14.9635	34.146	31.6	7.9	0	41	27	34146	274	215	dapD	175	160	KIP63317.1	120
3233	15.3285	33.333	31.2	7.9	0	42	28	33333	274	215	dapD	174	158	WP_044074624.1	117
3234	35.7664	27.551	32	8	4	98	54	27551	274	218	dapD	134	298	MBD9298957.1	205
3235	33.9416	29.032	31.6	8.1	4	93	51	29032	274	210	dapD	129	234	CCZ12666.1	146
3236	36.1314	29.293	32	8.1	4	99	54	29293	274	217	dapD	130	289	WP_028908004.1	196
3237	25.5474	28.571	31.2	8.1	2	70	41	28571	274	211	dapD	151	122	WP_073045107.1	53
3238	9.85401	48.148	31.2	8.3	0	27	14	48148	274	202	dapD	176	145	WP_125104526.1	119
3239	15.3285	33.333	31.2	8.5	0	42	28	33333	274	215	dapD	174	158	WP_044080624.1	117
3240	30.6569	29.762	31.6	8.6	3	84	46	29762	274	208	dapD	134	284	WP_153082971.1	205
3241	37.9562	28.846	31.6	8.7	5	104	55	28846	274	217	dapD	129	295	WP_005846476.1	196
3242	34.6715	28.421	31.6	8.8	4	95	53	28421	274	213	dapD	130	289	WP_008566299.1	199
3243	27.3723	28	30.4	9	2	75	41	28000	274	211	dapD	150	86	WP_052484596.1	12
3244	33.9416	29.032	31.6	9.1	4	93	51	29032	274	210	dapD	129	286	MBD9230152.1	198
3245	31.7518	24.138	32	9.1	2	87	50	24138	274	217	dapD	131	669	WP_172273763.1	599
3246	45.9854	22.222	31.6	9.6	5	126	77	22222	274	232	dapD	117	412	WP_036892373.1	298
3247	34.6715	30.526	31.6	9.7	4	95	51	30526	274	213	dapD	130	288	HCD77349.1	198
3248	52.5547	21.528	31.6	9.7	6	144	91	21528	274	232	dapD	100	412	WP_116616178.1	280
3249	35.4015	25.773	31.6	9.9	2	97	61	25773	274	213	dapD	128	289	WP_021824357.1	193
3250	41.6058	30.702	31.2	9.9	5	114	58	30702	274	205	dapD	93	140	WP_104404040.1	47
3251	14.5985	32.5	30.8	9.9	0	40	27	32500	274	211	dapD	172	155	WP_158570099.1	116
3414	27.3723	33.333	33.9	2.4	2	75	48	33333	274	126	dapF	53	246	WP_013265837.1	173
3415	27.7372	34.211	33.9	2.4	3	76	44	34211	274	125	dapF	53	247	WP_004353800.1	175
3416	10.219	42.857	29.6	2.9	0	28	16	42857	274	274	dapF	247	28	HAT62039.1	1
3417	27.3723	33.333	33.5	3	2	75	48	33333	274	126	dapF	53	246	WP_036925653.1	173
3418	27.3723	32	33.1	4.3	2	75	49	32000	274	126	dapF	53	246	WP_089367209.1	173
3419	33.9416	26.882	32.7	5.1	2	93	65	26882	274	104	dapF	13	421	RKW58765.1	331
3420	27.7372	32.895	32.7	5.4	3	76	45	32895	274	125	dapF	53	247	WP_007367357.1	175
3421	33.9416	26.882	32.3	5.5	2	93	65	26882	274	104	dapF	13	421	WP_078805823.1	331
3422	28.1022	31.169	32.7	5.9	3	77	47	31169	274	126	dapF	53	248	WP_025000027.1	175
3423	28.1022	32.468	32.7	6	3	77	46	32468	274	126	dapF	53	246	WP_025839732.1	173
3424	33.5766	22.826	32	6	3	92	56	22826	274	244	dapF	166	205	WP_060932724.1	116
3425	27.7372	32.895	32.3	6.2	3	76	45	32895	274	125	dapF	53	247	WP_036855042.1	175
3426	21.1679	29.31	31.6	6.4	2	58	37	29310	274	232	dapF	176	127	CDF22478.1	73
3427	27.7372	32.895	32.3	6.7	3	76	45	32895	274	125	dapF	53	247	WP_118866761.1	175
3428	27.7372	32.895	32.3	7.5	3	76	45	32895	274	125	dapF	53	247	WP_013672023.1	175
3429	27.7372	32.895	32.3	7.5	3	76	45	32895	274	125	dapF	53	247	WP_029216412.1	175
3430	33.9416	26.882	32	8.6	2	93	65	26882	274	104	dapF	13	420	WP_019187495.1	330
3431	28.1022	32.468	32	8.7	3	77	46	32468	274	126	dapF	53	248	WP_024998680.1	175
3433	72.0207	24.46	45.8	5.4e-05	4	139	79	24460	193	152	dcd	14	137	WP_153137847.1	25
3434	16.5803	40.625	30.4	5.1	1	32	17	40625	193	164	dcd	133	69	WP_070667687.1	40
3435	19.6891	39.474	31.2	9.8	1	38	19	39474	193	116	dcd	83	703	WP_094381472.1	666
3436	47.4074	34.375	40	0.002	1	64	41	34375	135	72	dicA	10	66	MBD9027991.1	3
3437	45.1852	32.787	36.2	0.013	0	61	41	32787	135	71	dicA	11	70	EFI72006.1	10
3438	45.1852	32.787	36.2	0.013	0	61	41	32787	135	71	dicA	11	70	EFI72006.1	10
3439	45.1852	32.787	36.2	0.013	0	61	41	32787	135	71	dicA	11	68	WP_039870610.1	8
3440	52.5926	29.577	35.8	0.016	1	71	47	29577	135	71	dicA	1	68	WP_004377157.1	1
3441	45.1852	36.066	36.6	0.019	0	61	39	36066	135	67	dicA	7	117	CCX43155.1	57
3442	45.9259	32.258	35.4	0.044	0	62	42	32258	135	67	dicA	6	117	WP_036928655.1	56
3443	45.9259	32.258	35.4	0.045	0	62	42	32258	135	67	dicA	6	117	WP_103003505.1	56
3444	47.4074	31.25	35.4	0.056	0	64	44	31250	135	67	dicA	4	117	WP_004345354.1	54
3445	47.4074	31.25	35.4	0.058	0	64	44	31250	135	67	dicA	4	117	WP_028899078.1	54
3446	39.2593	33.962	34.3	0.059	0	53	35	33962	135	63	dicA	11	60	WP_036865652.1	8
3447	79.2593	29.907	35.8	0.059	4	107	63	29907	135	104	dicA	10	109	WP_172586747.1	3
3448	43.7037	37.288	35.4	0.059	0	59	37	37288	135	67	dicA	9	118	WP_025791498.1	60
3449	45.9259	32.258	35	0.063	0	62	42	32258	135	67	dicA	6	117	WP_004377505.1	56
3450	47.4074	31.25	35	0.07	0	64	44	31250	135	67	dicA	4	117	WP_025065677.1	54
3451	47.4074	31.25	35	0.071	0	64	44	31250	135	67	dicA	4	117	WP_025070110.1	54
3452	47.4074	31.25	35	0.073	0	64	44	31250	135	67	dicA	4	117	WP_007411848.1	54
3453	47.4074	31.25	35	0.074	0	64	44	31250	135	67	dicA	4	117	WP_021590288.1	54
3454	46.6667	31.746	34.7	0.087	0	63	43	31746	135	67	dicA	5	118	WP_119248557.1	56
3455	82.2222	27.928	35	0.089	4	111	68	27928	135	104	dicA	6	111	WP_044081090.1	1
3456	67.4074	30.769	35.8	0.09	2	91	60	30769	135	89	dicA	1	90	WP_153129355.1	1
3457	67.4074	30.769	35.8	0.093	2	91	60	30769	135	89	dicA	1	90	WP_153113446.1	1
3458	67.4074	30.769	35.8	0.093	2	91	60	30769	135	89	dicA	1	90	HBJ04716.1	1
3459	48.8889	30.303	35.4	0.099	1	66	45	30303	135	74	dicA	10	90	GAY30372.1	25
3460	67.4074	30.769	35.4	0.1	2	91	60	30769	135	89	dicA	1	109	MBD9056667.1	20
3461	46.6667	25.397	33.9	0.1	0	63	47	25397	135	67	dicA	5	68	WP_036912430.1	6
3462	79.2593	28.972	35	0.1	4	107	64	28972	135	104	dicA	10	109	WP_025838178.1	3
3463	48.8889	30.303	35.4	0.11	1	66	45	30303	135	74	dicA	10	93	WP_133159521.1	28
3464	45.1852	32.787	33.9	0.17	0	61	41	32787	135	67	dicA	7	118	WP_118200048.1	58
3465	45.1852	31.148	33.9	0.17	0	61	42	31148	135	67	dicA	7	118	WP_117661559.1	58
3466	45.1852	32.787	33.9	0.17	0	61	41	32787	135	67	dicA	7	118	WP_022120483.1	58
3467	45.1852	36.066	33.9	0.17	0	61	39	36066	135	67	dicA	7	119	WP_028908559.1	59
3468	45.1852	32.787	33.9	0.18	0	61	41	32787	135	67	dicA	7	118	WP_153073230.1	58
3469	43.7037	35.593	33.9	0.18	0	59	38	35593	135	67	dicA	9	118	WP_008823541.1	60
3470	42.2222	38.596	34.3	0.18	1	57	30	38596	135	57	dicA	1	52	WP_091900301.1	1
3471	45.1852	32.787	33.9	0.19	0	61	41	32787	135	67	dicA	7	118	WP_153087870.1	58
3472	49.6296	31.343	34.3	0.19	1	67	45	31343	135	70	dicA	5	68	CDA45571.1	2
3473	45.1852	32.787	33.9	0.2	0	61	41	32787	135	67	dicA	7	118	RGX88389.1	58
3474	47.4074	29.688	33.9	0.21	0	64	45	29688	135	67	dicA	4	117	WP_070666274.1	54
3475	45.1852	32.787	33.9	0.22	0	61	41	32787	135	67	dicA	7	118	WP_006847329.1	58
3476	29.6296	40	32.7	0.25	0	40	24	40000	135	59	dicA	20	55	WP_155715877.1	16
3477	45.1852	32.787	33.5	0.25	0	61	41	32787	135	67	dicA	7	118	WP_144152220.1	58
3478	50.3704	30.882	34.7	0.26	2	68	45	30882	135	122	dicA	57	413	CDE06366.1	346
3479	52.5926	30.986	32.7	0.26	2	71	46	30986	135	71	dicA	1	68	WP_154482121.1	1
3480	35.5556	37.5	32	0.31	0	48	30	37500	135	67	dicA	20	52	MBD9087707.1	5
3481	79.2593	26.168	33.5	0.38	4	107	67	26168	135	104	dicA	10	109	WP_089365891.1	3
3482	97.7778	26.515	33.5	0.4	5	132	86	26515	135	131	dicA	10	133	WP_036906326.1	3
3483	36.2963	36.735	33.1	0.44	1	49	29	36735	135	55	dicA	7	58	WP_074759983.1	12
3484	48.1481	30.769	32	0.45	0	65	45	30769	135	72	dicA	8	72	MQO98383.1	8
3485	78.5185	26.415	33.1	0.46	3	106	70	26415	135	110	dicA	10	105	WP_088399267.1	3
3486	30.3704	31.707	32	0.5	0	41	28	31707	135	62	dicA	22	59	WP_006846518.1	19
3487	30.3704	31.707	32	0.5	0	41	28	31707	135	62	dicA	22	59	WP_118115545.1	19
3488	45.1852	32.787	32.7	0.51	0	61	41	32787	135	67	dicA	7	118	WP_089543408.1	58
3489	79.2593	26.168	33.1	0.52	4	107	67	26168	135	104	dicA	10	109	WP_107625574.1	3
3490	42.2222	36.842	32.7	0.54	1	57	31	36842	135	57	dicA	1	52	WP_091767752.1	1
3491	45.1852	27.869	31.6	0.56	0	61	44	27869	135	71	dicA	11	67	WP_028904453.1	7
3492	64.4444	28.736	32.7	0.58	2	87	49	28736	135	83	dicA	10	89	WP_094382396.1	3
3493	45.1852	31.148	32.3	0.6	0	61	42	31148	135	67	dicA	7	118	WP_153096042.1	58
3494	39.2593	32.075	31.6	0.61	0	53	36	32075	135	63	dicA	11	58	WP_118355609.1	6
3495	45.1852	31.148	32.3	0.61	0	61	42	31148	135	67	dicA	7	118	WP_117692186.1	58
3496	46.6667	28.571	32	0.62	0	63	45	28571	135	68	dicA	6	63	WP_118141320.1	1
3497	49.6296	29.851	31.6	0.66	2	67	44	29851	135	64	dicA	1	67	WP_100020455.1	1
3498	51.1111	30.435	32.7	0.68	1	69	47	30435	135	72	dicA	5	80	CDB05959.1	12
3499	38.5185	30.769	31.6	0.69	0	52	36	30769	135	62	dicA	11	60	WP_036867427.1	9
3500	38.5185	30.769	31.6	0.69	0	52	36	30769	135	62	dicA	11	60	WP_036867427.1	9
3501	35.5556	35.417	31.2	0.8	0	48	31	35417	135	55	dicA	8	53	WP_028909589.1	6
3502	40	29.63	31.2	0.8	0	54	38	29630	135	64	dicA	11	62	CDB05121.1	9
3503	52.5926	28.169	32.7	0.8	0	71	51	28169	135	71	dicA	1	71	WP_120174382.1	1
3504	46.6667	28.571	31.6	0.81	0	63	45	28571	135	68	dicA	6	63	WP_118253228.1	1
3505	78.5185	26.415	32.3	0.84	2	106	75	26415	135	118	dicA	14	120	CCX67677.1	17
3506	45.1852	31.148	31.6	0.84	0	61	42	31148	135	67	dicA	7	88	MBD9271787.1	28
3507	52.5926	29.577	31.2	0.88	2	71	47	29577	135	71	dicA	1	68	WP_021826311.1	1
3508	45.9259	32.258	31.6	0.94	0	62	42	32258	135	67	dicA	6	62	WP_134842568.1	1
3509	45.1852	34.426	32.3	0.94	1	61	39	34426	135	69	dicA	10	63	WP_004368163.1	3
3510	52.5926	29.577	32.3	0.95	0	71	50	29577	135	71	dicA	1	71	WP_021672201.1	1
3511	52.5926	26.761	32.3	0.95	0	71	52	26761	135	71	dicA	1	71	WP_025077832.1	1
3512	47.4074	31.25	32	0.96	2	64	42	31250	135	77	dicA	15	74	WP_036906981.1	12
3513	46.6667	28.571	31.6	1.1	0	63	45	28571	135	68	dicA	6	63	MQN78740.1	1
3514	56.2963	28.947	31.6	1.1	1	76	47	28947	135	74	dicA	6	77	WP_153093502.1	2
3515	42.963	31.034	31.6	1.1	1	58	32	31034	135	72	dicA	15	60	WP_130830005.1	11
3516	29.6296	37.5	30.8	1.1	0	40	25	37500	135	47	dicA	8	45	WP_092108790.1	6
3517	47.4074	31.25	31.6	1.2	2	64	42	31250	135	77	dicA	15	74	WP_004339630.1	12
3518	47.4074	26.563	32.3	1.2	0	64	47	26563	135	71	dicA	8	71	WP_029906248.1	8
3519	47.4074	31.25	31.6	1.2	2	64	42	31250	135	77	dicA	15	74	WP_021672407.1	12
3520	29.6296	37.5	30.8	1.2	0	40	25	37500	135	47	dicA	8	45	WP_091826728.1	6
3521	45.1852	34.426	32	1.2	1	61	39	34426	135	69	dicA	10	63	WP_036859657.1	3
3522	47.4074	31.25	31.6	1.2	2	64	42	31250	135	77	dicA	15	68	WP_174299188.1	6
3523	44.4444	28.333	30.4	1.3	1	60	40	28333	135	60	dicA	1	57	WP_027452791.1	1
3524	45.1852	27.869	30.8	1.3	0	61	44	27869	135	71	dicA	11	67	WP_033150063.1	7
3525	47.4074	31.25	31.2	1.3	2	64	42	31250	135	77	dicA	15	68	EHG16539.1	6
3526	82.2222	27.027	32	1.3	4	111	69	27027	135	104	dicA	6	111	WP_036863477.1	1
3527	38.5185	32.692	30.8	1.3	0	52	35	32692	135	59	dicA	8	70	SFF80710.1	19
3528	44.4444	28.333	30.4	1.3	1	60	40	28333	135	60	dicA	1	57	WP_006282618.1	1
3529	70.3704	23.158	32	1.4	3	95	65	23158	135	102	dicA	10	91	WP_153118500.1	3
3530	38.5185	32.692	30.8	1.5	0	52	35	32692	135	59	dicA	8	70	SET30942.1	19
3531	38.5185	32.692	30.8	1.5	0	52	35	32692	135	59	dicA	8	70	SET30942.1	19
3532	35.5556	25	30.4	1.5	0	48	36	25000	135	60	dicA	13	58	WP_091819018.1	11
3533	51.1111	30.435	32	1.5	1	69	47	30435	135	72	dicA	5	75	EHJ40512.1	7
3534	29.6296	37.5	30.4	1.5	0	40	25	37500	135	47	dicA	8	45	WP_094387771.1	6
3535	34.0741	36.957	30	1.5	0	46	29	36957	135	67	dicA	22	47	CUP07303.1	2
3536	45.1852	31.148	31.6	1.6	1	61	41	31148	135	69	dicA	10	63	WP_044113212.1	3
3537	49.6296	25.373	30.4	1.6	1	67	45	25373	135	71	dicA	10	68	WP_027200119.1	2
3538	72.5926	29.592	31.6	1.6	3	98	57	29592	135	100	dicA	10	95	WP_099977202.1	3
3539	79.2593	28.037	31.6	1.7	4	107	65	28037	135	104	dicA	10	109	KGF50938.1	3
3540	81.4815	24.545	31.6	1.7	3	110	75	24545	135	107	dicA	6	110	WP_036924438.1	1
3541	42.2222	35.088	31.6	1.7	1	57	32	35088	135	57	dicA	1	52	WP_036910405.1	1
3542	30.3704	29.268	30.4	1.7	0	41	29	29268	135	62	dicA	22	59	WP_118191463.1	19
3543	52.5926	30.986	31.6	1.7	0	71	49	30986	135	71	dicA	1	71	WP_018464335.1	1
3544	37.037	28	30.4	1.8	0	50	36	28000	135	60	dicA	11	56	WP_073043085.1	7
3545	52.5926	32.394	31.6	1.8	0	71	48	32394	135	71	dicA	1	71	WP_008564617.1	1
3546	37.7778	29.412	30.4	1.8	0	51	36	29412	135	61	dicA	11	60	WP_107622201.1	10
3547	29.6296	37.5	30.4	1.8	0	40	25	37500	135	47	dicA	8	45	WP_025002842.1	6
3548	45.1852	31.148	31.6	1.9	1	61	41	31148	135	69	dicA	10	63	WP_025829976.1	3
3549	39.2593	28.302	30	1.9	0	53	38	28302	135	63	dicA	11	60	WP_104405766.1	8
3550	45.1852	31.148	31.6	1.9	1	61	41	31148	135	69	dicA	10	63	WP_019967091.1	3
3551	42.963	25.862	30.4	1.9	0	58	43	25862	135	61	dicA	4	59	WP_004382180.1	2
3552	50.3704	27.941	31.6	1.9	1	68	48	27941	135	72	dicA	6	78	SEN02714.1	11
3553	37.7778	29.412	30	1.9	0	51	36	29412	135	61	dicA	11	60	WP_025067220.1	10
3554	39.2593	26.415	30	1.9	0	53	39	26415	135	63	dicA	11	58	WP_008124342.1	6
3555	37.7778	29.412	30	1.9	0	51	36	29412	135	61	dicA	11	60	WP_100014539.1	10
3556	47.4074	26.563	31.6	2	0	64	47	26563	135	71	dicA	8	71	WP_007367824.1	8
3557	39.2593	26.415	30	2.1	0	53	39	26415	135	63	dicA	11	58	WP_120174963.1	6
3558	45.1852	31.148	31.2	2.1	1	61	41	31148	135	69	dicA	10	63	WP_062434585.1	3
3559	81.4815	24.545	31.2	2.1	3	110	75	24545	135	107	dicA	6	110	WP_004360115.1	1
3560	45.1852	31.148	31.2	2.2	1	61	41	31148	135	69	dicA	10	63	WP_036900245.1	3
3561	52.5926	32.394	31.6	2.2	0	71	48	32394	135	71	dicA	1	71	WP_004373888.1	1
3562	52.5926	32.394	31.2	2.2	0	71	48	32394	135	71	dicA	1	71	WP_070667988.1	1
3563	45.1852	32.787	31.2	2.2	1	61	40	32787	135	69	dicA	10	63	WP_007135857.1	3
3564	47.4074	26.563	31.2	2.3	0	64	47	26563	135	71	dicA	8	71	WP_004354046.1	8
3565	52.5926	29.577	31.2	2.4	0	71	50	29577	135	71	dicA	1	71	CDA92719.1	1
3566	29.6296	37.5	30	2.4	0	40	25	37500	135	47	dicA	8	45	WP_091818524.1	6
3567	66.6667	26.667	31.2	2.5	2	90	61	26667	135	94	dicA	10	92	WP_036875404.1	3
3568	37.037	26	30	2.5	0	50	37	26000	135	60	dicA	11	58	WP_125235222.1	9
3569	78.5185	25.472	31.2	2.5	3	106	71	25472	135	107	dicA	10	108	WP_172891363.1	3
3570	98.5185	26.316	31.2	2.5	5	133	85	26316	135	131	dicA	10	133	WP_070692488.1	3
3571	47.4074	32.813	31.2	2.5	0	64	43	32813	135	71	dicA	8	71	WP_104368257.1	8
3572	56.2963	30.263	31.2	2.5	0	76	53	30263	135	76	dicA	1	76	WP_005845822.1	1
3573	35.5556	35.417	30.4	2.6	0	48	31	35417	135	49	dicA	2	79	WP_094384332.1	32
3574	42.963	29.31	30.4	2.6	1	58	40	29310	135	77	dicA	21	68	EGW48991.1	11
3575	29.6296	30	30	2.6	0	40	28	30000	135	61	dicA	22	58	WP_042519868.1	19
3576	52.5926	29.577	31.2	2.7	0	71	50	29577	135	71	dicA	1	71	WP_008824270.1	1
3577	45.1852	31.148	30.8	2.7	1	61	41	31148	135	69	dicA	10	63	WP_130829516.1	3
3578	30.3704	36.585	29.6	2.7	0	41	26	36585	135	48	dicA	8	43	WP_044066096.1	3
3579	52.5926	29.577	31.2	2.7	0	71	50	29577	135	71	dicA	1	71	WP_036869406.1	1
3580	66.6667	26.667	30.8	2.8	2	90	61	26667	135	94	dicA	10	92	WP_004366412.1	3
3581	36.2963	32.653	29.6	2.8	0	49	33	32653	135	59	dicA	11	55	MBD8997768.1	7
3582	39.2593	26.415	30.4	2.8	0	53	39	26415	135	67	dicA	15	63	WP_024992793.1	11
3583	54.0741	38.356	31.2	2.9	4	73	30	38356	135	113	dicA	45	230	WP_006951865.1	169
3584	46.6667	30.159	30.8	2.9	1	63	43	30159	135	71	dicA	10	65	WP_100014477.1	3
3585	49.6296	29.851	30.4	2.9	1	67	46	29851	135	71	dicA	5	67	WP_036879774.1	2
3586	45.1852	31.148	30.8	2.9	1	61	41	31148	135	69	dicA	10	63	WP_025066255.1	3
3587	34.0741	28.261	30	2.9	0	46	33	28261	135	60	dicA	15	56	WP_081410180.1	11
3588	47.4074	31.25	30.8	2.9	1	64	43	31250	135	72	dicA	10	66	MBD8936928.1	3
3589	47.4074	31.25	30.8	2.9	1	64	43	31250	135	72	dicA	10	66	WP_118355755.1	3
3590	72.5926	27.551	30.8	2.9	2	98	66	27551	135	102	dicA	10	100	WP_024999590.1	3
3591	47.4074	31.25	30.8	3	1	64	43	31250	135	72	dicA	10	66	HAH76689.1	3
3592	47.4074	31.25	30.8	3	1	64	43	31250	135	72	dicA	10	66	CDE35055.1	3
3593	46.6667	30.159	30.8	3	1	63	43	30159	135	71	dicA	10	65	WP_124139816.1	3
3594	37.037	26	29.6	3	0	50	37	26000	135	60	dicA	11	58	WP_019967834.1	9
3595	47.4074	31.25	30.8	3	1	64	43	31250	135	72	dicA	10	66	WP_040596519.1	3
3596	90.3704	22.951	30.8	3.1	3	122	67	22951	135	113	dicA	10	115	WP_024989184.1	3
3597	46.6667	30.159	30.8	3.1	1	63	43	30159	135	71	dicA	10	65	WP_100023640.1	3
3598	46.6667	30.159	30.8	3.1	1	63	43	30159	135	71	dicA	10	65	WP_045166965.1	3
3599	48.8889	30.303	30.8	3.1	1	66	45	30303	135	72	dicA	8	69	CDA94937.1	4
3600	46.6667	30.159	30.8	3.1	1	63	43	30159	135	71	dicA	10	65	WP_100356922.1	3
3601	45.1852	31.148	30.8	3.1	1	61	41	31148	135	69	dicA	10	63	WP_039875597.1	3
3602	36.2963	32.653	29.6	3.2	0	49	33	32653	135	59	dicA	11	55	WP_118355379.1	7
3603	45.1852	31.148	30.8	3.2	1	61	41	31148	135	69	dicA	10	67	ERK03904.1	7
3604	46.6667	30.159	30.8	3.2	1	63	43	30159	135	71	dicA	10	65	WP_099891735.1	3
3605	55.5556	26.667	31.2	3.2	3	75	51	26667	135	119	dicA	49	144	WP_007575415.1	70
3606	46.6667	30.159	30.8	3.2	1	63	43	30159	135	71	dicA	10	65	WP_099995617.1	3
3607	45.1852	31.148	30.8	3.2	1	61	41	31148	135	69	dicA	10	63	WP_004375561.1	3
3608	30.3704	36.585	29.6	3.3	0	41	26	36585	135	48	dicA	8	43	WP_042519534.1	3
3609	45.1852	31.148	30.8	3.3	1	61	41	31148	135	69	dicA	10	63	WP_024992411.1	3
3610	46.6667	30.159	30.8	3.3	1	63	43	30159	135	71	dicA	10	65	WP_061869227.1	3
3611	45.1852	31.148	30.8	3.3	1	61	41	31148	135	69	dicA	10	63	WP_018921008.1	3
3612	45.1852	31.148	30.8	3.3	1	61	41	31148	135	69	dicA	10	63	WP_018921008.1	3
3613	38.5185	34.615	30	3.3	1	52	33	34615	135	53	dicA	2	82	CDA43768.1	32
3614	46.6667	30.159	30.8	3.3	1	63	43	30159	135	71	dicA	10	65	WP_096405303.1	3
3615	46.6667	30.159	30.8	3.3	1	63	43	30159	135	71	dicA	10	65	WP_028905139.1	3
3616	46.6667	30.159	30.8	3.3	1	63	43	30159	135	71	dicA	10	65	WP_099835150.1	3
3617	46.6667	30.159	30.8	3.3	1	63	43	30159	135	71	dicA	10	65	WP_097549733.1	3
3618	46.6667	30.159	30.8	3.3	1	63	43	30159	135	71	dicA	10	65	WP_097549733.1	3
3619	45.1852	31.148	30.8	3.3	1	61	41	31148	135	69	dicA	10	63	WP_004377794.1	3
3620	38.5185	26.923	29.6	3.4	1	52	36	26923	135	62	dicA	11	63	EGC84991.1	14
3621	48.1481	27.692	30.8	3.4	1	65	46	27692	135	69	dicA	6	65	ADK96054.1	1
3622	44.4444	26.667	29.6	3.4	1	60	41	26667	135	60	dicA	1	57	WP_024989277.1	1
3623	78.5185	25.472	30.8	3.4	3	106	71	25472	135	110	dicA	10	105	RKW51395.1	3
3624	45.1852	29.508	29.3	3.4	1	61	40	29508	135	61	dicA	1	58	WP_007572250.1	1
3625	38.5185	26.923	29.6	3.5	1	52	36	26923	135	62	dicA	11	60	WP_036877587.1	11
3626	38.5185	26.923	29.6	3.5	1	52	36	26923	135	62	dicA	11	60	WP_036877587.1	11
3627	38.5185	34.615	30	3.5	1	52	33	34615	135	53	dicA	2	82	MBD9036495.1	32
3628	46.6667	30.159	30.8	3.5	1	63	43	30159	135	71	dicA	10	65	WP_025000639.1	3
3629	46.6667	30.159	30.8	3.5	1	63	43	30159	135	71	dicA	10	65	WP_088438814.1	3
3630	43.7037	27.119	29.6	3.5	0	59	43	27119	135	61	dicA	3	60	KGF36280.1	2
3631	46.6667	28.571	30.8	3.6	1	63	44	28571	135	71	dicA	10	65	WP_040595657.1	3
3632	45.1852	31.148	30.8	3.7	1	61	41	31148	135	69	dicA	10	89	KXB82313.1	29
3633	60.7407	28.049	30.8	3.7	2	82	51	28049	135	83	dicA	10	84	WP_006951857.1	3
3634	61.4815	27.711	30	3.7	2	83	57	27711	135	89	dicA	10	88	WP_004384066.1	6
3635	47.4074	25	30.4	3.7	1	64	47	25000	135	69	dicA	7	68	WP_021588718.1	5
3636	45.1852	29.508	30.4	3.7	1	61	42	29508	135	69	dicA	10	63	WP_050803231.1	3
3637	47.4074	29.688	29.6	3.8	1	64	42	29688	135	64	dicA	1	61	WP_007368852.1	1
3638	34.0741	28.261	30.4	3.8	0	46	33	28261	135	60	dicA	15	83	EFA44500.1	38
3639	47.4074	29.688	30.4	3.8	1	64	44	29688	135	72	dicA	10	66	WP_091842445.1	3
3640	45.1852	29.508	30.4	3.8	1	61	42	29508	135	69	dicA	10	63	WP_094447899.1	3
3641	52.5926	29.577	30.8	3.9	0	71	50	29577	135	71	dicA	1	71	WP_094402993.1	1
3642	39.2593	26.415	30	3.9	0	53	39	26415	135	67	dicA	15	63	WP_036929321.1	11
3643	39.2593	26.415	30	4.1	0	53	39	26415	135	67	dicA	15	63	WP_025064766.1	11
3644	43.7037	27.119	29.3	4.1	0	59	43	27119	135	61	dicA	3	65	WP_155945428.1	7
3645	39.2593	30.189	29.3	4.3	0	53	37	30189	135	63	dicA	11	59	WP_073205032.1	7
3646	47.4074	29.688	29.3	4.3	1	64	42	29688	135	64	dicA	1	61	WP_013671043.1	1
3647	51.1111	28.986	30	4.4	1	69	48	28986	135	77	dicA	10	74	WP_008824297.1	6
3648	34.0741	28.261	30	4.4	0	46	33	28261	135	60	dicA	15	56	WP_036929316.1	11
3649	34.0741	28.261	30	4.4	0	46	33	28261	135	60	dicA	15	56	WP_116617476.1	11
3650	39.2593	26.415	30	4.4	0	53	39	26415	135	67	dicA	15	63	WP_025072884.1	11
3651	39.2593	26.415	30	4.4	0	53	39	26415	135	67	dicA	15	63	WP_102189049.1	11
3652	34.0741	28.261	29.3	4.5	0	46	33	28261	135	60	dicA	15	56	WP_156439234.1	11
3653	76.2963	28.155	30.8	4.6	4	103	56	28155	135	105	dicA	8	425	HCD76901.1	336
3654	34.0741	28.261	30	4.6	0	46	33	28261	135	60	dicA	15	56	WP_130830616.1	11
3655	45.1852	29.508	30.4	4.6	1	61	42	29508	135	69	dicA	10	63	WP_174254478.1	3
3656	58.5185	26.582	30.4	4.6	1	79	57	26582	135	87	dicA	10	81	WP_036909403.1	3
3657	33.3333	31.111	29.3	4.6	0	45	31	31111	135	64	dicA	20	59	CCY64448.1	15
3658	45.1852	31.148	30.4	4.7	1	61	41	31148	135	69	dicA	10	63	HAT60940.1	3
3659	47.4074	28.125	29.3	4.8	1	64	43	28125	135	64	dicA	1	61	WP_004356193.1	1
3660	51.1111	28.986	30	4.9	1	69	48	28986	135	77	dicA	10	74	WP_070694785.1	6
3661	45.1852	29.508	30	4.9	1	61	42	29508	135	69	dicA	10	63	WP_006283353.1	3
3662	43.7037	27.119	29.3	4.9	0	59	43	27119	135	61	dicA	3	72	ERT59407.1	14
3663	74.0741	27	30	5	3	100	61	27000	135	102	dicA	10	97	WP_004356292.1	3
3664	45.1852	29.508	30	5	1	61	42	29508	135	69	dicA	10	63	WP_027452923.1	3
3665	45.1852	29.508	30	5	1	61	42	29508	135	69	dicA	10	63	WP_027452923.1	3
3666	46.6667	28.571	30.4	5.1	1	63	44	28571	135	71	dicA	10	74	EGQ16498.1	12
3667	74.0741	27	30	5.1	3	100	61	27000	135	102	dicA	10	97	WP_021670337.1	3
3668	48.1481	27.692	30.4	5.1	1	65	46	27692	135	69	dicA	6	75	WP_155715490.1	11
3669	57.7778	32.051	29.6	5.1	3	78	46	32051	135	85	dicA	8	84	WP_107626034.1	14
3670	48.1481	29.231	29.3	5.1	1	65	37	29231	135	84	dicA	20	71	WP_094389571.1	16
3671	52.5926	30.986	30.4	5.2	0	71	49	30986	135	71	dicA	1	71	WP_007134642.1	1
3672	52.5926	30.986	30.4	5.2	0	71	49	30986	135	71	dicA	1	71	WP_007134642.1	1
3673	47.4074	29.688	30.4	5.2	0	64	45	29688	135	71	dicA	8	71	HAH92085.1	8
3674	45.1852	29.508	30	5.2	1	61	42	29508	135	69	dicA	10	63	WP_074548801.1	3
3675	52.5926	25.352	30.4	5.2	0	71	53	25352	135	71	dicA	1	71	WP_013264432.1	1
3676	39.2593	41.509	30.4	5.4	1	53	30	41509	135	60	dicA	8	151	WP_073207557.1	100
3677	52.5926	25.352	30	5.6	0	71	53	25352	135	71	dicA	1	71	WP_004361666.1	1
3678	38.5185	30.769	28.9	5.7	0	52	36	30769	135	59	dicA	8	57	WP_091843056.1	6
3679	48.1481	27.692	30	5.7	1	65	46	27692	135	69	dicA	6	75	WP_004382544.1	11
3680	45.1852	29.508	30	5.7	1	61	42	29508	135	69	dicA	10	63	WP_172275755.1	3
3681	45.1852	29.508	30	5.7	1	61	42	29508	135	69	dicA	10	63	WP_172275755.1	3
3682	48.1481	27.692	30	5.8	1	65	46	27692	135	69	dicA	6	75	WP_009434896.1	11
3683	53.3333	29.167	30	5.9	2	72	46	29167	135	76	dicA	10	74	WP_077196293.1	3
3684	34.0741	28.261	29.3	5.9	0	46	33	28261	135	60	dicA	15	83	KXA36915.1	38
3685	29.6296	35	28.9	6	0	40	26	35000	135	47	dicA	8	45	WP_033150539.1	6
3686	47.4074	28.125	28.9	6	1	64	43	28125	135	64	dicA	1	61	WP_036866634.1	1
3687	47.4074	28.125	28.9	6.1	1	64	43	28125	135	64	dicA	1	61	MBD8937365.1	1
3688	52.5926	30.986	30	6.2	0	71	49	30986	135	71	dicA	1	71	WP_006281554.1	1
3689	47.4074	28.125	28.9	6.3	1	64	43	28125	135	64	dicA	1	61	WP_036855080.1	1
3690	45.1852	31.148	30	6.4	1	61	41	31148	135	69	dicA	10	63	WP_044073644.1	3
3691	44.4444	30	30	6.5	1	60	41	30000	135	69	dicA	11	63	WP_028898334.1	4
3692	36.2963	34.694	29.6	6.6	1	49	31	34694	135	69	dicA	22	55	EHO74319.1	7
3693	40	35.185	29.3	6.7	1	54	32	35185	135	61	dicA	8	91	WP_106813555.1	41
3694	45.1852	29.508	29.6	6.8	1	61	42	29508	135	69	dicA	10	63	WP_052043386.1	3
3695	37.037	32	28.9	6.9	0	50	34	32000	135	60	dicA	11	56	WP_092069738.1	7
3696	52.5926	26.761	30	6.9	2	71	45	26761	135	79	dicA	10	67	WP_117692220.1	3
3697	46.6667	25.397	28.5	6.9	0	63	47	25397	135	73	dicA	11	69	WP_025791114.1	7
3698	47.4074	28.125	28.9	7	1	64	43	28125	135	64	dicA	1	61	WP_004337895.1	1
3699	70.3704	28.421	29.3	7.1	3	95	60	28421	135	101	dicA	10	95	WP_040561480.1	6
3700	18.5185	40	28.5	7.1	0	25	15	40000	135	49	dicA	25	44	WP_083809441.1	20
3701	48.1481	23.077	28.9	7.3	0	65	50	23077	135	75	dicA	11	71	WP_118079917.1	7
3702	47.4074	28.125	30	7.4	0	64	46	28125	135	71	dicA	8	71	CCZ13811.1	8
3703	52.5926	26.761	30	7.4	2	71	45	26761	135	79	dicA	10	67	WP_118139057.1	3
3704	45.1852	29.508	29.6	7.4	1	61	42	29508	135	69	dicA	10	63	EGC20697.1	3
3705	45.1852	31.148	29.6	7.5	1	61	41	31148	135	69	dicA	10	63	WP_044065864.1	3
3706	45.1852	29.508	28.5	7.5	0	61	43	29508	135	71	dicA	11	67	WP_073042497.1	7
3707	45.1852	31.148	29.6	7.7	1	61	41	31148	135	69	dicA	10	63	WP_042518637.1	3
3708	45.1852	31.148	29.6	7.8	1	61	41	31148	135	69	dicA	10	63	CDD04922.1	3
3709	29.6296	35	28.5	7.9	0	40	26	35000	135	59	dicA	20	55	WP_036927479.1	16
3710	52.5926	26.761	29.6	8	2	71	45	26761	135	79	dicA	10	67	WP_153086327.1	3
3711	47.4074	29.688	29.3	8	2	64	43	29688	135	77	dicA	15	74	WP_025066589.1	12
3712	52.5926	26.761	29.6	8.1	2	71	45	26761	135	79	dicA	10	67	WP_118152102.1	3
3713	52.5926	26.761	29.6	8.2	2	71	45	26761	135	79	dicA	10	67	RHK46807.1	3
3714	52.5926	26.761	29.6	8.3	2	71	45	26761	135	79	dicA	10	67	MBD9087853.1	3
3715	30.3704	26.829	28.1	8.4	0	41	30	26829	135	62	dicA	22	47	EGC19010.1	7
3716	42.963	32.759	29.3	8.5	1	58	38	32759	135	77	dicA	21	74	WP_124140017.1	17
3717	52.5926	26.761	29.6	8.5	2	71	45	26761	135	79	dicA	10	67	CDA65437.1	3
3718	43.7037	23.729	28.5	8.5	0	59	45	23729	135	64	dicA	6	64	WP_028896978.1	6
3719	29.6296	35	28.5	8.5	0	40	26	35000	135	47	dicA	8	45	WP_073208099.1	6
3720	47.4074	29.688	29.3	8.5	2	64	43	29688	135	77	dicA	15	68	WP_088401631.1	6
3721	52.5926	26.761	29.6	8.5	2	71	45	26761	135	79	dicA	10	67	WP_153084337.1	3
3722	45.1852	32.787	28.5	8.6	1	61	38	32787	135	61	dicA	1	58	WP_153138506.1	1
3723	52.5926	26.761	29.6	8.7	2	71	45	26761	135	79	dicA	10	67	WP_144152241.1	3
3724	45.1852	27.869	29.6	8.7	1	61	43	27869	135	69	dicA	10	63	WP_021671029.1	3
3725	42.963	31.034	28.9	8.8	0	58	40	31034	135	59	dicA	2	90	WP_008564704.1	33
3726	52.5926	26.761	29.6	8.8	2	71	45	26761	135	79	dicA	10	67	WP_153138544.1	3
3727	52.5926	26.761	29.6	8.8	2	71	45	26761	135	79	dicA	10	67	WP_118254831.1	3
3728	44.4444	28.333	28.5	8.8	1	60	40	28333	135	60	dicA	1	57	WP_073207496.1	1
3729	28.1481	31.579	30	8.8	0	38	26	31579	135	134	dicA	97	119	WP_118220270.1	82
3730	36.2963	30.612	28.5	9	0	49	34	30612	135	59	dicA	11	55	WP_172344824.1	7
3731	52.5926	26.761	29.6	9	2	71	45	26761	135	79	dicA	10	67	WP_117728077.1	3
3732	52.5926	26.761	29.6	9	2	71	45	26761	135	79	dicA	10	67	WP_118065227.1	3
3733	45.1852	27.869	29.6	9.1	1	61	43	27869	135	69	dicA	10	63	WP_091768193.1	3
3734	44.4444	33.333	28.9	9.2	1	60	37	33333	135	61	dicA	2	91	MUU03785.1	35
3735	47.4074	29.688	28.9	9.3	2	64	43	29688	135	77	dicA	15	68	WP_004364334.1	6
3736	47.4074	29.688	28.9	9.3	2	64	43	29688	135	77	dicA	15	74	WP_019036944.1	12
3737	47.4074	29.688	28.9	9.4	2	64	43	29688	135	77	dicA	15	68	WP_112200475.1	6
3738	52.5926	26.761	29.6	9.4	2	71	45	26761	135	79	dicA	10	67	WP_006847361.1	3
3739	52.5926	26.761	29.6	9.5	2	71	45	26761	135	79	dicA	10	67	WP_118190675.1	3
3740	52.5926	26.761	29.6	9.5	2	71	45	26761	135	79	dicA	10	67	RGX96306.1	3
3741	52.5926	26.761	29.6	9.6	2	71	45	26761	135	79	dicA	10	67	WP_153093083.1	3
3742	52.5926	26.761	29.6	9.6	2	71	45	26761	135	79	dicA	10	67	WP_117587954.1	3
3743	52.5926	26.761	29.6	9.6	2	71	45	26761	135	79	dicA	10	67	RGS47578.1	3
3744	52.5926	26.761	29.6	9.6	2	71	45	26761	135	79	dicA	10	67	WP_153081214.1	3
3745	47.4074	29.688	28.9	9.8	2	64	43	29688	135	77	dicA	15	68	WP_004353888.1	6
3746	52.5926	26.761	29.6	9.8	2	71	45	26761	135	79	dicA	10	67	WP_153079635.1	3
3747	45.1852	27.869	29.3	9.8	1	61	43	27869	135	69	dicA	10	63	WP_025078384.1	3
3748	56.2963	28.947	29.6	9.9	0	76	54	28947	135	76	dicA	1	76	WP_036896028.1	1
3749	37.7778	25.49	28.5	9.9	0	51	38	25490	135	60	dicA	10	58	WP_060941147.1	8
3983	32.7623	29.412	44.3	0.002	8	153	89	29412	467	245	dnaA	104	178	WP_029901791.1	34
3984	25.0535	31.624	40	0.02	6	117	62	31624	467	274	dnaA	165	146	EFA44495.1	41
3985	23.9829	30.357	40	0.032	5	112	72	30357	467	274	dnaA	164	207	WP_155950178.1	101
3986	26.1242	25.41	39.7	0.047	3	122	80	25410	467	282	dnaA	170	220	WP_155941955.1	101
3987	20.985	22.449	36.2	0.36	1	98	74	22449	467	265	dnaA	168	123	CDE06899.1	28
3988	21.8415	22.549	36.2	0.48	2	102	76	22549	467	269	dnaA	168	183	WP_074550193.1	85
3989	21.4133	23	36.2	0.61	2	100	74	23000	467	269	dnaA	170	183	WP_074613809.1	87
3990	20.7709	29.897	36.6	0.77	3	97	56	29897	467	461	dnaA	365	248	WP_170935126.1	164
3991	23.3405	33.945	34.7	2.5	3	109	68	33945	467	388	dnaA	282	277	WP_036879296.1	171
3992	17.773	20.482	33.5	2.9	2	83	63	20482	467	268	dnaA	187	104	WP_008124932.1	24
3993	26.3383	26.829	33.9	3.1	7	123	77	26829	467	246	dnaA	128	180	WP_029902651.1	67
3994	9.20771	41.86	32.3	6	1	43	24	41860	467	125	dnaA	83	110	WP_007174523.1	69
3995	7.92291	43.243	33.1	6	1	37	19	43243	467	118	dnaA	82	266	WP_106811060.1	232
3996	19.2719	24.444	33.5	6.2	2	90	58	24444	467	238	dnaA	159	114	MBD9041407.1	25
3997	14.9893	28.571	31.6	6.4	3	70	46	28571	467	236	dnaA	168	82	ERJ98719.1	16
3998	14.561	26.471	33.5	6.6	1	68	47	26471	467	69	dnaA	5	500	WP_004377548.1	433
3999	14.561	26.471	33.1	6.9	1	68	47	26471	467	69	dnaA	5	500	WP_025065659.1	433
4000	14.9893	28.571	32.7	7.5	3	70	46	28571	467	236	dnaA	168	169	WP_021825918.1	103
4001	21.8415	27.451	32.7	7.5	5	102	61	27451	467	292	dnaA	200	177	CCY82279.1	80
4002	17.773	19.277	32	7.6	2	83	64	19277	467	268	dnaA	187	104	WP_103003577.1	24
4003	14.561	26.471	33.1	7.8	1	68	47	26471	467	69	dnaA	5	500	WP_025882251.1	433
4004	23.9829	25	33.1	7.9	6	112	72	25000	467	245	dnaA	136	113	WP_004376455.1	12
4005	14.561	26.471	33.1	8.2	1	68	47	26471	467	69	dnaA	5	500	WP_070666983.1	433
4006	14.9893	31.429	32.7	8.3	3	70	44	31429	467	236	dnaA	168	169	WP_091824485.1	103
4007	23.9829	25	32.7	8.4	6	112	72	25000	467	245	dnaA	136	113	WP_018919115.1	12
4008	23.9829	25	32.7	8.4	6	112	72	25000	467	245	dnaA	136	113	WP_070667189.1	12
4009	17.773	19.277	32	8.7	2	83	64	19277	467	268	dnaA	187	104	WP_025072820.1	24
4010	11.7773	29.091	32.7	9.1	0	55	39	29091	467	213	dnaA	159	79	WP_070720911.1	25
4011	16.7024	24.359	32.7	9.9	2	78	55	24359	467	79	dnaA	5	509	WP_078805623.1	433
4261	30.9979	28.767	56.6	3.17e-08	4	146	99	28767	471	453	dnaB	310	151	WP_094881165.1	9
4262	59.2357	23.297	52.4	7.32e-06	13	279	185	23297	471	454	dnaB	192	608	WP_073209275.1	343
4263	56.9002	22.761	50.4	3.42e-05	11	268	188	22761	471	456	dnaB	201	592	SFB71380.1	332
4264	56.9002	22.761	50.4	3.56e-05	11	268	188	22761	471	456	dnaB	201	600	WP_081358036.1	340
4265	56.9002	22.761	50.4	3.69e-05	11	268	188	22761	471	456	dnaB	201	600	WP_073045785.1	340
4266	56.9002	22.761	50.4	3.7e-05	11	268	188	22761	471	456	dnaB	201	592	SHM65118.1	332
4267	56.9002	22.388	49.3	7.14e-05	11	268	189	22388	471	456	dnaB	201	603	WP_028908117.1	343
4268	58.1741	22.628	48.1	0.000182	12	274	181	22628	471	456	dnaB	201	592	SEH82835.1	332
4269	58.1741	22.628	48.1	0.000185	12	274	181	22628	471	456	dnaB	201	600	WP_074683851.1	340
4270	58.1741	22.628	47.8	0.00021	12	274	181	22628	471	456	dnaB	201	571	ADE82627.1	311
4271	50.5308	23.95	47.4	0.000234	7	238	147	23950	471	425	dnaB	209	377	WP_094448799.1	153
4272	14.2251	37.313	42	0.000512	2	67	35	37313	471	69	dnaB	3	63	MQN49117.1	4
4273	14.2251	32.836	39.7	0.007	0	67	45	32836	471	291	dnaB	225	86	WP_094881166.1	20
4274	52.017	21.224	42	0.014	9	245	170	21224	471	436	dnaB	202	611	OYP67051.1	380
4275	52.017	21.224	42	0.014	9	245	170	21224	471	436	dnaB	202	612	WP_141210444.1	381
4276	31.2102	23.81	40.8	0.029	4	147	100	23810	471	451	dnaB	309	543	WP_094390332.1	405
4277	53.2909	21.912	39.3	0.1	6	251	173	21912	471	460	dnaB	221	560	WP_074761345.1	322
4278	53.2909	21.912	39.3	0.1	6	251	173	21912	471	460	dnaB	221	560	WP_073043966.1	322
4279	31.6348	25.503	37.7	0.28	4	149	101	25503	471	345	dnaB	206	572	MBD9015927.1	425
4280	14.2251	31.343	37.4	0.35	2	67	42	31343	471	272	dnaB	207	141	WP_102188253.1	78
4281	38.0042	21.229	35.8	1.1	6	179	107	21229	471	387	dnaB	212	242	SFO51953.1	95
4282	38.0042	21.229	35.8	1.2	6	179	107	21229	471	387	dnaB	212	229	WP_092067936.1	82
4283	28.8747	25.735	35.8	1.3	4	136	70	25735	471	277	dnaB	142	524	MBD9057619.1	420
4284	41.8259	24.365	35.4	1.7	5	197	110	24365	471	390	dnaB	201	186	WP_021668570.1	22
4285	28.8747	25.735	35.4	1.7	4	136	70	25735	471	277	dnaB	142	524	MBD8993569.1	420
4286	36.3057	21.637	35	1.7	6	171	102	21637	471	387	dnaB	219	232	HCN52606.1	92
4287	33.758	24.528	35.4	1.7	6	159	93	24528	471	312	dnaB	163	1393	GAY29042.1	1253
4288	12.5265	33.898	35	1.7	0	59	39	33898	471	227	dnaB	169	138	HCC86718.1	80
4289	33.758	24.528	35.4	1.8	6	159	93	24528	471	312	dnaB	163	1408	WP_104370327.1	1268
4290	13.8004	35.385	35	1.8	3	65	38	35385	471	165	dnaB	103	147	WP_033148382.1	85
4291	33.758	24.528	35.4	1.8	6	159	93	24528	471	312	dnaB	163	1408	WP_172204529.1	1268
4292	28.8747	25.735	35	2.2	4	136	70	25735	471	277	dnaB	142	569	WP_118311243.1	465
4293	28.8747	25.735	35	2.2	4	136	70	25735	471	277	dnaB	142	524	WP_153091521.1	420
4294	29.087	22.628	35	2.3	4	137	59	22628	471	114	dnaB	9	558	WP_004354051.1	438
4295	34.8195	26.829	34.3	2.4	7	164	79	26829	471	387	dnaB	228	152	WP_013063007.1	26
4296	24.8408	24.786	34.7	2.4	5	117	80	24786	471	272	dnaB	158	146	WP_073208984.1	36
4297	12.9512	31.148	34.7	2.7	0	61	42	31148	471	139	dnaB	79	74	WP_091916868.1	14
4298	13.1635	30.645	34.7	2.7	2	62	39	30645	471	272	dnaB	212	142	WP_125234315.1	84
4299	24.8408	24.786	34.7	2.7	5	117	80	24786	471	272	dnaB	158	159	SHK85485.1	49
4300	11.465	31.481	34.3	3	1	54	34	31481	471	272	dnaB	219	140	WP_091958694.1	90
4301	29.087	22.628	34.3	3.4	4	137	59	22628	471	114	dnaB	9	558	WP_013670748.1	438
4302	29.087	22.628	34.3	3.5	4	137	59	22628	471	114	dnaB	9	558	WP_118866242.1	438
4303	11.0403	34.615	34.3	3.5	0	52	34	34615	471	277	dnaB	226	588	RGK23641.1	537
4304	29.087	22.628	34.3	3.6	4	137	59	22628	471	114	dnaB	9	558	WP_036853455.1	438
4305	11.0403	34.615	34.3	3.7	0	52	34	34615	471	277	dnaB	226	524	WP_158556358.1	473
4306	29.087	22.628	34.3	3.9	4	137	59	22628	471	114	dnaB	9	558	WP_007367815.1	438
4307	16.1359	26.316	32.7	5.1	3	76	47	26316	471	468	dnaB	399	144	RGX93259.1	72
4308	25.4777	24.167	33.9	5.5	3	120	88	24167	471	343	dnaB	226	600	WP_153123484.1	482
4309	13.1635	29.032	33.5	5.7	2	62	40	29032	471	272	dnaB	212	140	WP_091815986.1	82
4310	34.8195	26.22	32.7	6.6	7	164	80	26220	471	387	dnaB	228	152	WP_094447309.1	26
4311	20.8068	28.571	33.1	6.7	3	98	57	28571	471	271	dnaB	186	110	WP_171839936.1	14
4312	20.8068	28.571	33.1	6.7	3	98	57	28571	471	271	dnaB	186	112	WP_044047644.1	16
4313	34.8195	26.22	32.7	6.8	7	164	80	26220	471	387	dnaB	228	152	WP_091862556.1	26
4314	13.8004	33.846	33.1	6.9	3	65	39	33846	471	165	dnaB	103	147	WP_028902437.1	85
4315	11.6773	30.909	32.3	7	2	55	34	30909	471	459	dnaB	409	169	WP_025880838.1	115
4316	11.0403	32.692	33.5	7.1	0	52	35	32692	471	277	dnaB	226	555	MBD9015181.1	504
4317	11.6773	30.909	32.3	7.2	2	55	34	30909	471	459	dnaB	409	169	WP_021590437.1	115
4318	42.2505	20.101	33.1	7.6	3	199	151	20101	471	423	dnaB	226	541	WP_091860189.1	350
4319	16.1359	26.316	32.3	7.7	3	76	47	26316	471	468	dnaB	399	144	WP_118080909.1	72
4320	11.2527	35.849	33.1	8.3	0	53	34	35849	471	227	dnaB	175	137	WP_118355788.1	85
4321	11.2527	35.849	33.1	8.3	0	53	34	35849	471	227	dnaB	175	137	MBD8936979.1	85
4322	9.97877	38.298	32.7	8.4	1	47	28	38298	471	271	dnaB	225	110	WP_023057788.1	65
4323	11.2527	35.849	33.1	8.4	0	53	34	35849	471	227	dnaB	175	137	HAH77325.1	85
4324	11.2527	35.849	33.1	8.4	0	53	34	35849	471	227	dnaB	175	137	WP_007899177.1	85
4325	26.1146	26.829	33.1	8.4	4	123	59	26829	471	264	dnaB	142	511	WP_119249242.1	420
4326	9.97877	38.298	32.7	8.5	1	47	28	38298	471	271	dnaB	225	110	WP_021672417.1	65
4327	9.97877	38.298	32.7	8.6	1	47	28	38298	471	271	dnaB	225	110	WP_036871824.1	65
4328	11.465	29.63	33.1	8.6	1	54	35	29630	471	272	dnaB	219	144	WP_091899784.1	94
4329	11.465	29.63	33.1	8.8	1	54	35	29630	471	272	dnaB	219	144	WP_091914731.1	94
4330	9.97877	38.298	32.7	9.1	1	47	28	38298	471	271	dnaB	225	110	WP_004354713.1	65
4331	11.465	29.63	32.7	9.2	1	54	35	29630	471	272	dnaB	219	178	SEV88668.1	128
4332	15.4989	27.397	32.7	9.6	1	73	43	27397	471	408	dnaB	336	600	WP_094381813.1	538
4333	16.3482	29.87	33.1	9.7	3	77	44	29870	471	356	dnaB	284	166	WP_013671751.1	96
4334	16.3482	29.87	33.1	9.7	3	77	44	29870	471	356	dnaB	284	166	WP_013671751.1	96
4335	16.3482	29.87	33.1	9.7	3	77	44	29870	471	356	dnaB	284	166	WP_118867099.1	96
4336	11.465	29.63	32.7	9.7	1	54	35	29630	471	272	dnaB	219	178	SEE13983.1	128
4337	16.3482	29.87	33.1	9.9	3	77	44	29870	471	356	dnaB	284	166	WP_025067753.1	96
4338	16.3482	29.87	33.1	9.9	3	77	44	29870	471	356	dnaB	284	166	WP_004351779.1	96
4339	49.8938	21.277	32.3	9.9	10	235	132	21277	471	387	dnaB	158	222	WP_021670376.1	36
4340	60	27.891	55.5	3.68e-08	5	147	95	27891	245	243	dnaC	103	174	WP_153092221.1	33
4341	102.857	26.587	55.8	5.1e-08	11	252	157	26587	245	244	dnaC	8	244	WP_029901791.1	6
4342	60	26.531	54.3	2e-07	5	147	97	26531	245	243	dnaC	103	246	HBF05442.1	105
4343	60.4082	26.351	48.1	2.38e-05	5	148	100	26351	245	245	dnaC	103	229	WP_074613809.1	86
4344	60.4082	26.351	48.1	2.51e-05	5	148	100	26351	245	245	dnaC	103	229	WP_074550193.1	86
4345	35.9184	29.545	45.4	0.00011	2	88	59	29545	245	187	dnaC	101	112	CDE06899.1	27
4346	60.8163	25.503	44.3	0.000485	5	149	100	25503	245	243	dnaC	101	245	WP_036916231.1	102
4347	71.4286	24.571	44.3	0.000695	8	175	119	24571	245	226	dnaC	58	288	CCY15790.1	121
4348	50.6122	25.806	43.1	0.000758	4	124	86	25806	245	221	dnaC	102	174	SUB78901.1	53
4349	50.6122	25.806	43.1	0.000825	4	124	86	25806	245	221	dnaC	102	174	SUB80422.1	53
4350	59.5918	24.658	43.1	0.001	4	146	101	24658	245	243	dnaC	103	241	WP_155941955.1	100
4351	55.5102	26.471	42.7	0.001	5	136	86	26471	245	221	dnaC	94	223	WP_029902651.1	94
4352	50.6122	25.806	42	0.001	4	124	86	25806	245	221	dnaC	102	137	WP_181792941.1	16
4353	50.6122	25.806	42	0.001	4	124	86	25806	245	221	dnaC	102	137	WP_181792969.1	16
4354	62.0408	26.974	42	0.002	6	152	93	26974	245	221	dnaC	79	147	WP_167639457.1	5
4355	52.2449	24.219	42	0.003	4	128	85	24219	245	221	dnaC	101	224	WP_025877962.1	102
4356	51.0204	24.8	41.6	0.003	4	125	88	24800	245	221	dnaC	101	237	WP_004343793.1	115
4357	78.7755	25.389	41.6	0.004	8	193	112	25389	245	221	dnaC	52	210	TFH82761.1	27
4358	52.6531	26.357	40.8	0.004	5	129	77	26357	245	222	dnaC	101	175	WP_094383465.1	58
4359	50.6122	25	40.4	0.005	4	124	87	25000	245	221	dnaC	102	137	ETD18786.1	16
4360	51.0204	24.8	40.4	0.005	4	125	88	24800	245	221	dnaC	101	150	WP_081710358.1	28
4361	20	42.857	41.6	0.006	1	49	25	42857	245	147	dnaC	102	270	WP_009013240.1	222
4362	19.5918	43.75	41.2	0.007	1	48	24	43750	245	147	dnaC	103	49	EHO69542.1	2
4363	50.6122	24.194	40.8	0.007	4	124	88	24194	245	221	dnaC	102	237	WP_007136156.1	116
4364	50.6122	25	40.4	0.008	4	124	87	25000	245	221	dnaC	102	237	WP_027444842.1	116
4365	50.6122	24.194	40.4	0.009	4	124	88	24194	245	221	dnaC	102	237	WP_036890688.1	116
4366	51.0204	24	40	0.011	4	125	89	24000	245	221	dnaC	101	252	EFB32240.1	130
4367	51.0204	24.8	39.7	0.015	4	125	88	24800	245	221	dnaC	101	237	WP_099893067.1	115
4368	51.0204	24.8	39.7	0.017	4	125	88	24800	245	221	dnaC	101	237	WP_015310368.1	115
4369	38.7755	26.316	38.9	0.021	2	95	68	26316	245	195	dnaC	101	207	WP_005848139.1	115
4370	33.4694	30.488	39.3	0.026	2	82	45	30488	245	186	dnaC	105	288	WP_009237918.1	219
4371	35.9184	31.818	39.3	0.029	3	88	52	31818	245	183	dnaC	97	117	WP_006282419.1	37
4372	44.0816	30.556	38.9	0.035	6	108	63	30556	245	171	dnaC	70	241	WP_028908310.1	140
4373	82.0408	23.383	38.5	0.035	7	201	127	23383	245	195	dnaC	8	194	WP_021825918.1	8
4374	39.1837	26.042	38.5	0.036	1	96	69	26042	245	195	dnaC	100	180	WP_155941857.1	87
4375	37.9592	33.333	38.9	0.037	4	93	44	33333	245	183	dnaC	97	117	CCY64516.1	37
4376	44.0816	29.63	38.9	0.041	6	108	64	29630	245	171	dnaC	70	236	WP_036910455.1	135
4377	44.0816	29.63	38.9	0.041	6	108	64	29630	245	171	dnaC	70	236	WP_091767609.1	135
4378	56.3265	23.913	38.1	0.044	5	138	96	23913	245	240	dnaC	106	228	WP_021826305.1	97
4379	36.7347	32.222	38.5	0.052	4	90	49	32222	245	183	dnaC	97	117	WP_172173784.1	37
4380	36.3265	32.584	38.5	0.053	4	89	50	32584	245	183	dnaC	97	116	WP_130828718.1	36
4381	51.0204	24.8	37.4	0.056	4	125	88	24800	245	221	dnaC	101	137	ETD18599.1	15
4382	36.3265	32.584	38.5	0.056	4	89	50	32584	245	183	dnaC	97	116	WP_147785620.1	36
4383	46.1224	29.204	38.5	0.059	6	113	68	29204	245	171	dnaC	65	234	WP_172277466.1	128
4384	51.0204	24.8	37.4	0.062	4	125	88	24800	245	221	dnaC	101	150	WP_081710367.1	28
4385	47.7551	23.077	37.7	0.066	3	117	85	23077	245	218	dnaC	103	217	WP_011965959.1	105
4386	44.0816	28.704	38.1	0.067	6	108	65	28704	245	171	dnaC	70	237	WP_104370253.1	136
4387	33.4694	30.488	38.1	0.068	2	82	53	30488	245	183	dnaC	105	297	WP_172277460.1	217
4388	44.0816	28.704	38.1	0.069	6	108	65	28704	245	171	dnaC	70	237	WP_172204112.1	136
4389	15.102	40.541	38.1	0.073	0	37	22	40541	245	137	dnaC	101	240	WP_094434543.1	204
4390	44.0816	28.704	38.1	0.073	6	108	65	28704	245	171	dnaC	70	231	GAY28941.1	130
4391	42.449	25	37.4	0.076	3	104	72	25000	245	222	dnaC	125	185	EFN91746.1	82
4392	95.5102	21.795	38.1	0.078	11	234	163	21795	245	224	dnaC	2	273	WP_104403815.1	49
4393	42.449	25	37.4	0.083	3	104	72	25000	245	222	dnaC	125	206	WP_100067221.1	103
4394	70.2041	22.674	37.7	0.083	7	172	113	22674	245	185	dnaC	23	239	MBD9026981.1	79
4395	38.7755	31.579	37.7	0.089	4	95	47	31579	245	183	dnaC	95	117	MBB1538859.1	35
4396	37.9592	32.258	37.7	0.09	4	93	45	32258	245	183	dnaC	97	117	MBB1550397.1	37
4397	37.9592	32.258	37.7	0.093	4	93	45	32258	245	183	dnaC	97	117	MBB1530738.1	37
4398	36.3265	32.584	37.7	0.094	4	89	50	32584	245	183	dnaC	97	117	MBA7487857.1	37
4399	36.3265	32.584	37.7	0.096	4	89	50	32584	245	183	dnaC	97	125	EGQ16200.1	45
4400	36.3265	32.584	37.7	0.097	4	89	50	32584	245	183	dnaC	97	125	ETD29197.1	45
4401	61.2245	25.333	37	0.1	6	150	84	25333	245	222	dnaC	96	181	WP_097550237.1	37
4402	36.3265	34.831	37.4	0.1	4	89	48	34831	245	183	dnaC	97	116	WP_024998036.1	36
4403	36.3265	32.584	37.4	0.11	4	89	50	32584	245	183	dnaC	97	116	WP_036875143.1	36
4404	36.3265	32.584	37.4	0.11	4	89	50	32584	245	183	dnaC	97	116	WP_004365182.1	36
4405	36.3265	32.584	37.4	0.11	4	89	50	32584	245	183	dnaC	97	116	WP_040556787.1	36
4406	43.6735	29.907	37.4	0.11	6	107	63	29907	245	171	dnaC	71	241	WP_074832853.1	141
4407	43.6735	29.907	37.4	0.11	6	107	63	29907	245	171	dnaC	71	241	WP_073043153.1	141
4408	43.6735	29.907	37.4	0.12	6	107	63	29907	245	171	dnaC	71	241	WP_091858900.1	141
4409	17.1429	42.857	37.4	0.12	0	42	24	42857	245	124	dnaC	83	621	WP_025875577.1	580
4410	43.6735	29.907	37.4	0.12	6	107	63	29907	245	171	dnaC	71	241	WP_013063129.1	141
4411	43.6735	29.907	37.4	0.12	6	107	63	29907	245	171	dnaC	71	241	WP_074762315.1	141
4412	33.0612	35.802	37.4	0.13	3	81	34	35802	245	171	dnaC	97	103	CDF21618.1	35
4413	17.1429	42.857	37.4	0.13	0	42	24	42857	245	124	dnaC	83	621	WP_060939935.1	580
4414	17.1429	42.857	37.4	0.13	0	42	24	42857	245	124	dnaC	83	627	KXA45099.1	586
4415	35.9184	30.682	37.4	0.13	3	88	53	30682	245	183	dnaC	97	117	WP_173651723.1	37
4416	43.6735	29.907	37.4	0.13	6	107	63	29907	245	171	dnaC	71	241	WP_033150032.1	141
4417	78.3673	22.917	37.4	0.13	8	192	133	22917	245	226	dnaC	41	288	CDE06810.1	106
4418	36.3265	31.461	37.4	0.13	3	89	51	31461	245	183	dnaC	97	116	WP_048797960.1	36
4419	36.3265	31.461	37.4	0.13	4	89	51	31461	245	183	dnaC	97	117	WP_062432626.1	37
4420	60	24.49	36.6	0.14	6	147	89	24490	245	222	dnaC	96	181	WP_099836626.1	37
4421	36.3265	31.461	37.4	0.14	3	89	51	31461	245	183	dnaC	97	116	WP_007411721.1	36
4422	36.3265	31.461	37.4	0.14	3	89	51	31461	245	183	dnaC	97	116	WP_004346862.1	36
4423	24.4898	33.333	37.4	0.14	1	60	38	33333	245	124	dnaC	65	621	WP_006951068.1	564
4424	36.3265	31.461	37	0.14	3	89	51	31461	245	183	dnaC	97	116	WP_115154294.1	36
4425	20	40.816	37	0.14	1	49	24	40816	245	145	dnaC	97	80	CCY02131.1	37
4426	44.0816	28.704	37.4	0.14	3	108	59	28704	245	186	dnaC	79	290	WP_100189519.1	201
4427	35.9184	30.682	37	0.14	3	88	53	30682	245	183	dnaC	97	117	WP_091825085.1	37
4428	36.3265	31.461	37	0.14	4	89	51	31461	245	183	dnaC	97	117	WP_036895882.1	37
4429	35.5102	31.034	37	0.15	2	87	54	31034	245	183	dnaC	97	117	HAT62297.1	37
4430	35.9184	30.682	37	0.15	3	88	53	30682	245	183	dnaC	97	134	SET14320.1	54
4431	36.3265	31.461	37	0.16	3	89	51	31461	245	183	dnaC	97	116	EFC74520.1	36
4432	44.0816	28.704	37	0.16	6	108	65	28704	245	171	dnaC	70	236	WP_091838803.1	135
4433	20	40.816	37	0.17	1	49	24	40816	245	145	dnaC	97	80	WP_107621086.1	37
4434	31.4286	36.364	36.2	0.17	4	77	39	36364	245	171	dnaC	97	104	RKW49611.1	36
4435	52.6531	28.682	36.6	0.18	7	129	68	28682	245	171	dnaC	46	115	WP_007572832.1	8
4436	20	40.816	37	0.18	1	49	24	40816	245	145	dnaC	97	79	MBD9200328.1	36
4437	35.9184	30.682	37	0.18	3	88	53	30682	245	183	dnaC	97	117	WP_028909187.1	37
4438	20	40.816	37	0.18	1	49	24	40816	245	145	dnaC	97	79	MBD9042529.1	36
4439	51.4286	23.016	37	0.18	3	126	87	23016	245	185	dnaC	65	235	CDF22087.1	115
4440	36.3265	33.708	36.6	0.19	4	89	49	33708	245	183	dnaC	97	116	WP_025000005.1	36
4441	36.3265	33.708	36.6	0.19	4	89	49	33708	245	183	dnaC	97	116	WP_097655926.1	36
4442	36.3265	33.708	36.6	0.19	4	89	49	33708	245	183	dnaC	97	116	WP_124140429.1	36
4443	36.3265	33.708	36.6	0.2	4	89	49	33708	245	183	dnaC	97	116	WP_100014347.1	36
4444	20.8163	33.333	37	0.2	1	51	23	33333	245	137	dnaC	98	240	WP_052486477.1	190
4445	36.3265	33.708	36.6	0.2	4	89	49	33708	245	183	dnaC	97	116	WP_099976374.1	36
4446	36.3265	33.708	36.6	0.2	4	89	49	33708	245	183	dnaC	97	116	WP_088437754.1	36
4447	36.3265	33.708	36.6	0.2	4	89	49	33708	245	183	dnaC	97	116	WP_099995718.1	36
4448	36.3265	33.708	36.6	0.2	4	89	49	33708	245	183	dnaC	97	116	WP_099983408.1	36
4449	36.3265	33.708	36.6	0.21	4	89	49	33708	245	183	dnaC	97	116	WP_097646677.1	36
4450	36.3265	33.708	36.6	0.21	4	89	49	33708	245	183	dnaC	97	116	WP_099891487.1	36
4451	36.3265	33.708	36.6	0.21	4	89	49	33708	245	183	dnaC	97	116	WP_099891487.1	36
4452	36.3265	33.708	36.6	0.21	4	89	49	33708	245	183	dnaC	97	116	WP_100189234.1	36
4453	36.3265	33.708	36.6	0.21	4	89	49	33708	245	183	dnaC	97	116	WP_100023759.1	36
4454	36.3265	33.708	36.6	0.21	4	89	49	33708	245	183	dnaC	97	116	WP_061868961.1	36
4455	35.5102	32.184	36.6	0.21	2	87	53	32184	245	183	dnaC	97	117	WP_094880690.1	37
4456	36.3265	33.708	36.6	0.21	4	89	49	33708	245	183	dnaC	97	116	WP_100018796.1	36
4457	36.3265	33.708	36.6	0.21	4	89	49	33708	245	183	dnaC	97	116	WP_100327774.1	36
4458	17.1429	42.857	37	0.21	0	42	24	42857	245	124	dnaC	83	621	WP_115083827.1	580
4459	36.3265	33.708	36.6	0.21	4	89	49	33708	245	183	dnaC	97	116	WP_112200188.1	36
4460	36.3265	33.708	36.6	0.21	4	89	49	33708	245	183	dnaC	97	116	WP_097550391.1	36
4461	35.9184	31.818	36.6	0.22	3	88	52	31818	245	183	dnaC	97	116	WP_025839131.1	36
4462	36.3265	33.708	36.6	0.22	4	89	49	33708	245	183	dnaC	97	116	WP_028904984.1	36
4463	36.3265	33.708	36.6	0.22	4	89	49	33708	245	183	dnaC	97	116	WP_014709905.1	36
4464	36.3265	33.708	36.6	0.22	4	89	49	33708	245	183	dnaC	97	116	WP_100356373.1	36
4465	36.3265	33.708	36.6	0.22	4	89	49	33708	245	183	dnaC	97	116	WP_096405156.1	36
4466	17.1429	42.857	36.6	0.22	0	42	24	42857	245	124	dnaC	83	621	WP_006044642.1	580
4467	19.1837	40.426	36.6	0.22	0	47	28	40426	245	124	dnaC	78	621	MBB1529695.1	575
4468	36.3265	33.708	36.6	0.22	4	89	49	33708	245	183	dnaC	97	116	WP_006045190.1	36
4469	36.3265	33.708	36.6	0.22	4	89	49	33708	245	183	dnaC	97	116	WP_100370377.1	36
4470	36.3265	33.708	36.6	0.22	4	89	49	33708	245	183	dnaC	97	116	WP_045168037.1	36
4471	23.2653	38.596	36.6	0.22	2	57	28	38596	245	145	dnaC	89	80	WP_005843569.1	31
4472	19.1837	40.426	36.6	0.22	0	47	28	40426	245	124	dnaC	78	621	MBB1538807.1	575
4473	23.2653	38.596	36.6	0.22	2	57	28	38596	245	145	dnaC	89	80	WP_027953225.1	31
4474	36.3265	33.708	36.6	0.23	4	89	49	33708	245	183	dnaC	97	116	RKW55157.1	36
4475	36.3265	33.708	36.6	0.23	4	89	49	33708	245	183	dnaC	97	116	WP_115083121.1	36
4476	17.1429	42.857	36.6	0.23	0	42	24	42857	245	124	dnaC	83	621	WP_100190014.1	580
4477	19.1837	40.426	36.6	0.23	0	47	28	40426	245	124	dnaC	78	621	MBB1550830.1	575
4478	44.0816	27.778	36.6	0.23	6	108	66	27778	245	171	dnaC	70	237	WP_091818483.1	136
4479	17.1429	42.857	36.6	0.23	0	42	24	42857	245	124	dnaC	83	621	WP_025001332.1	580
4480	17.1429	42.857	36.6	0.24	0	42	24	42857	245	124	dnaC	83	621	WP_004365655.1	580
4481	17.1429	42.857	36.6	0.24	0	42	24	42857	245	124	dnaC	83	621	WP_023926159.1	580
4482	17.1429	42.857	36.6	0.24	0	42	24	42857	245	124	dnaC	83	621	WP_004363316.1	580
4483	17.1429	42.857	36.6	0.24	0	42	24	42857	245	124	dnaC	83	621	WP_099836088.1	580
4484	43.2653	30.189	36.6	0.24	4	106	54	30189	245	148	dnaC	48	270	WP_153114077.1	180
4485	20	38.776	36.6	0.24	1	49	25	38776	245	145	dnaC	97	79	QJR97851.1	36
4486	37.9592	29.032	36.6	0.25	4	93	48	29032	245	183	dnaC	97	117	CCY80277.1	37
4487	38.7755	24.211	35.4	0.25	1	95	70	24211	245	195	dnaC	101	105	MST77812.1	13
4488	17.1429	42.857	36.6	0.25	0	42	24	42857	245	124	dnaC	83	621	WP_088400131.1	580
4489	24.4898	35	36.6	0.25	1	60	37	35000	245	124	dnaC	65	620	WP_025069890.1	563
4490	24.4898	35	36.6	0.25	1	60	37	35000	245	124	dnaC	65	620	WP_028900616.1	563
4491	35.9184	31.818	36.2	0.26	3	88	52	31818	245	183	dnaC	97	116	WP_004359111.1	36
4492	24.4898	35	36.6	0.26	1	60	37	35000	245	124	dnaC	65	620	WP_004380422.1	563
4493	31.0204	35.526	36.2	0.26	3	76	41	35526	245	171	dnaC	97	104	WP_065367960.1	36
4494	36.3265	31.461	36.2	0.27	4	89	51	31461	245	183	dnaC	97	117	WP_091854004.1	37
4495	24.4898	35	36.6	0.27	1	60	37	35000	245	124	dnaC	65	620	RKW50149.1	563
4496	25.3061	40.323	36.6	0.28	3	62	27	40323	245	142	dnaC	81	647	WP_157579578.1	596
4497	36.3265	32.584	36.2	0.28	3	89	50	32584	245	183	dnaC	97	116	WP_028896520.1	36
4498	36.3265	31.461	36.2	0.28	3	89	51	31461	245	183	dnaC	97	117	WP_036877351.1	37
4499	48.5714	28.571	36.2	0.29	5	119	75	28571	245	178	dnaC	65	237	CDA46086.1	124
4500	20	38.776	36.2	0.29	1	49	25	38776	245	145	dnaC	97	80	HCN53549.1	37
4501	17.1429	42.857	36.2	0.29	0	42	24	42857	245	124	dnaC	83	583	MBA7487953.1	542
4502	47.7551	31.624	36.2	0.29	4	117	51	31624	245	183	dnaC	89	140	WP_007173997.1	31
4503	25.3061	40.323	36.6	0.3	3	62	27	40323	245	142	dnaC	81	717	EFC69853.1	666
4504	31.0204	35.526	36.2	0.3	3	76	41	35526	245	171	dnaC	97	104	WP_036861452.1	36
[truncated: 13,486 more rows]

## Sheet: Hit vs no hit
	Hits	Hits over cutoff	Hits under cutoff	No hits
0	dicA	rbfA	dicA	yobI
1	rbfA	rpsE	lolA	pheM
2	yciS	mreB	glyQ	trpL
3	rpsF	ptsI	yciS
4	rpsE	yqgF	dapD
5	ihfA	ftsA	lolB
6	rpsD	hemA	lnt
7	tusE	nadE	rpsU
8	ubiD	nadD	fabA
9	mreB	ftsW	tusE
10	mreC	rpsS	acpS
11	priB	ftsZ	rpmC
12	mreD	lolC	yrfF
13	ycaR	waaA	cydX
14	rpsJ	dapB	tonB
15	ptsI	lolE	ybeY
16	yqgF	dapF	bamD
17	rnt	rplV	mreC
18	glmU	rplW	priB
19	ftsB	rplU	accA
20	ftsA	rplR	wzyE
21	ftsL	rplS	mreD
22	hemG	rplP	mukB
23	hemD	kdsA	mukF
24	nadD	kdsB	mukE
25	ftsW	tsaC	folB
26	csrA	rplJ	higA
27	rpsT	ftsI	lspA
28	ftsQ	birA	rpmF
29	rpsS	rplA	glyS
30	ftsZ	murI	ycaR
31	lolC	murJ	secE
32	lolB	folP	ubiX
33	waaA	murA	ydhL
34	hemA	murB	pssA
35	dapD	murC	rnpA
36	lolE	murD	hipB
37	acpS	murE	rplY
38	rplV	murF	lptE
39	lnt	murG	ygfZ
40	rplU	cydA	ubiD
41	rplR	cydB	lptA
42	rplS	dnaG	rnt
43	rplP	dcd	glmU
44	kdsA	rpoA	ftsB
45	kdsB	rpoE	iraM
46	tsaC	asd	zipA
47	rplJ	ribA	ftsL
48	ftsI	ribC	nusB
49	birA	rpoH	hemG
50	safA	ribE	hemD
51	rplA	ribD	safA
52	cydX	ribF	csrA
53	murI	lpxH	dnaC
54	murJ	lpxK	holA
55	folP	lpxL	ftsQ
56	murA	lpxA	lptD
57	murB	lpxB	rimM
58	murC	lpxC	lptF
59	murD	lpxD	holD
60	murE	ispH	ydfO
61	murF	mrdB	dnaT
62	murG	ispE
63	folB	ispF
64	cydA	ispG
65	cydB	rpsF
66	hda	ppa
67	dcd	rpsD
68	rpoA	rpsC
69	rpoE	rpsO
70	asd	rpsM
71	ribA	rpoD
72	ribC	rpsJ
73	rpoH	rpsH
74	ribE	rpsT
75	ribD	lexA
76	ribF	rpsR
77	lpxH	rpsQ
78	lpxK	rplX
79	lpxL	mraY
80	iraM	accB
81	lpxA	fbaA
82	zipA	infC
83	lpxC	infA
84	lpxD	rpmI
85	mrdA	rpmH
86	pyrH	thiL
87	mrdB	ihfA
88	rimM	rpmB
89	ispF	rpmD
90	ispG	lgt
91	glyS	parC
92	ppa	rplO
93	glyQ	nusG
94	rpsC	rplL
95	rpsO	dnaA
96	rpsM	dnaB
97	rpoD	dnaE
98	lolA	can
99	rpsH	hda
100	rpsU	holB
101	dapB	lepB
102	lexA	dxr
103	rpsR	tilS
104	rpsQ	fabZ
105	coaD	rplF
106	yrfF	fabH
107	tonB	yidC
108	rplX	rsgA
109	mraY	mrdA
110	bamD	secA
111	dapF	tsaB
112	accA	dnaN
113	wzyE	tsaE
114	accB	rho
115	mukB	pyrH
116	ispH	secY
117	fbaA	coaD
118	rplW	coaA
119	lspA	lptG
120	mukF	cca
121	mukE
122	ubiX
123	infC
124	rnpA
125	infA
126	rpmI
127	rpmH
128	thiL
129	ygfZ
130	rpmC
131	rpmB
132	rpmD
133	lgt
134	rpmF
135	parC
136	dnaT
137	rplO
138	nusG
139	ydfO
140	nusB
141	rplL
142	dnaA
143	dnaC
144	dnaB
145	dnaE
146	can
147	dnaG
148	holD
149	holB
150	holA
151	lepB
152	dxr
153	tilS
154	fabZ
155	rplF
156	fabA
157	rsgA
158	yidC
159	ybeY
160	rplY
161	fabH
162	higA
163	nadE
164	secA
165	tsaB
166	dnaN
167	secE
168	tsaE
169	ydhL
170	pssA
171	hipB
172	rho
173	ispE
174	secY
175	lpxB
176	coaA
177	lptD
178	lptE
179	lptF
180	lptG
181	cca
182	lptA

## Sheet: Original results
	qseqid	sseqid	pident	length	mismatch	gapopen	qstart	qend	sstart	send	evalue	bitscore	prot length	% id	% alignment
0	accA	CCX44667.1	26111	180	118	4	70	244	280	449	2.34e-07	55.8	319	26.111	56.4263
1	accA	WP_029903966.1	25397	189	125	5	69	251	278	456	1.24e-06	53.5	319	25.397	59.2476
2	accA	MBD9036265.1	26846	149	97	2	99	243	308	448	9.5e-06	50.8	319	26.846	46.7085
3	accA	MBD9028007.1	26846	149	97	2	99	243	308	448	9.76e-06	50.8	319	26.846	46.7085
4	accA	WP_094879566.1	26000	150	99	2	99	244	308	449	1.36e-05	50.4	319	26	47.0219
5	accA	WP_027450071.1	25694	144	95	2	99	238	308	443	1.85e-05	50.1	319	25.694	45.1411
6	accA	WP_091819125.1	25694	144	95	2	99	238	308	443	2.13e-05	49.7	319	25.694	45.1411
7	accA	WP_007896900.1	25333	150	100	2	99	244	308	449	3.21e-05	49.3	319	25.333	47.0219
8	accA	MBD9200536.1	25217	115	78	1	99	213	64	170	3.79e-05	48.5	319	25.217	36.0502
9	accA	WP_006950598.1	24667	150	101	2	99	244	308	449	3.82e-05	48.9	319	24.667	47.0219
10	accA	WP_106812713.1	25333	150	100	2	99	244	308	449	3.83e-05	48.9	319	25.333	47.0219
11	accA	CDB04496.1	25333	150	100	2	99	244	308	449	3.86e-05	48.9	319	25.333	47.0219
12	accA	MQO90162.1	24667	150	101	2	99	244	41	182	3.98e-05	48.1	319	24.667	47.0219
13	accA	CDE40953.1	24713	174	116	4	70	238	280	443	3.99e-05	48.9	319	24.713	54.5455
14	accA	CDF22244.1	25301	166	110	3	99	260	308	463	4.9e-05	48.9	319	25.301	52.0376
15	accA	MQN34542.1	24667	150	101	2	99	244	15	156	5.78e-05	47.4	319	24.667	47.0219
16	accA	WP_018462277.1	25217	115	78	1	99	213	308	414	5.87e-05	48.5	319	25.217	36.0502
17	accA	CDE58243.1	24581	179	120	4	71	244	281	449	5.9e-05	48.5	319	24.581	56.1129
18	accA	WP_077195866.1	24667	150	101	2	99	244	308	449	6.08e-05	48.5	319	24.667	47.0219
19	accA	CCZ12121.1	25217	115	78	1	99	213	69	175	7.01e-05	47.8	319	25.217	36.0502
20	accA	WP_172275592.1	24375	160	98	3	99	257	308	445	7.33e-05	48.1	319	24.375	50.1567
21	accA	WP_091958858.1	25000	144	96	2	99	238	308	443	7.94e-05	48.1	319	25	45.1411
22	accA	WP_092071890.1	25000	144	96	2	99	238	308	443	8.53e-05	48.1	319	25	45.1411
23	accA	WP_094391598.1	25000	144	96	2	99	238	308	443	9.4e-05	47.8	319	25	45.1411
24	accA	WP_103915874.1	25000	144	96	2	99	238	308	443	9.92e-05	47.8	319	25	45.1411
25	accA	WP_091841891.1	25000	144	96	2	99	238	308	443	0.0001	47.8	319	25	45.1411
26	accA	WP_073210216.1	25000	144	96	2	99	238	308	443	0.0001	47.8	319	25	45.1411
27	accA	WP_104405403.1	25301	166	110	3	99	260	308	463	0.000101	47.8	319	25.301	52.0376
28	accA	WP_091899545.1	25000	144	96	2	99	238	308	443	0.000103	47.8	319	25	45.1411
29	accA	WP_040595394.1	23611	144	98	2	99	238	308	443	0.000105	47.8	319	23.611	45.1411
30	accA	WP_036912322.1	25000	144	96	2	99	238	308	443	0.000106	47.8	319	25	45.1411
31	accA	WP_028903587.1	25000	144	96	2	99	238	308	443	0.000107	47.8	319	25	45.1411
32	accA	EGQ18231.1	23611	144	98	2	99	238	327	462	0.000108	47.8	319	23.611	45.1411
33	accA	WP_006282293.1	25217	115	78	1	99	213	308	414	0.000109	47.8	319	25.217	36.0502
34	accA	RGX93601.1	25333	150	100	2	99	244	308	449	0.000112	47.8	319	25.333	47.0219
35	accA	WP_013063032.1	25000	144	96	2	99	238	308	443	0.000115	47.8	319	25	45.1411
36	accA	WP_028908505.1	25000	144	96	2	99	238	308	443	0.000117	47.4	319	25	45.1411
37	accA	WP_091765343.1	25000	144	96	2	99	238	308	443	0.000117	47.4	319	25	45.1411
38	accA	WP_004362719.1	23611	144	98	2	99	238	308	443	0.000118	47.4	319	23.611	45.1411
39	accA	WP_028913290.1	25000	144	96	2	99	238	308	443	0.000123	47.4	319	25	45.1411
40	accA	WP_126677821.1	24161	149	101	2	99	243	308	448	0.000125	47.4	319	24.161	46.7085
41	accA	WP_004366214.1	23611	144	98	2	99	238	308	443	0.000125	47.4	319	23.611	45.1411
42	accA	WP_088399518.1	23611	144	98	2	99	238	308	443	0.000126	47.4	319	23.611	45.1411
43	accA	WP_088437823.1	24306	144	97	2	99	238	308	443	0.000128	47.4	319	24.306	45.1411
44	accA	CDE85857.1	26752	157	99	4	85	237	298	442	0.000129	47.4	319	26.752	49.2163
45	accA	WP_125234568.1	24684	158	106	3	99	251	308	457	0.00013	47.4	319	24.684	49.5298
46	accA	CCY64884.1	27222	180	110	7	70	241	279	445	0.000131	47.4	319	27.222	56.4263
47	accA	WP_099983345.1	24306	144	97	2	99	238	308	443	0.000131	47.4	319	24.306	45.1411
48	accA	MBD9042343.1	25217	115	78	1	99	213	308	414	0.000131	47.4	319	25.217	36.0502
49	accA	WP_099995778.1	24306	144	97	2	99	238	308	443	0.000137	47.4	319	24.306	45.1411
50	accA	WP_097648363.1	24306	144	97	2	99	238	308	443	0.000137	47.4	319	24.306	45.1411
51	accA	WP_024999233.1	24306	144	97	2	99	238	308	443	0.000137	47.4	319	24.306	45.1411
52	accA	WP_061869442.1	24306	144	97	2	99	238	308	443	0.00014	47.4	319	24.306	45.1411
53	accA	WP_100018733.1	24306	144	97	2	99	238	308	443	0.00014	47.4	319	24.306	45.1411
54	accA	WP_028906284.1	24306	144	97	2	99	238	308	443	0.000141	47.4	319	24.306	45.1411
55	accA	WP_036877128.1	24667	150	101	2	99	244	308	449	0.000142	47.4	319	24.667	47.0219
56	accA	WP_100015901.1	24306	144	97	2	99	238	308	443	0.000145	47.4	319	24.306	45.1411
57	accA	MBD9298895.1	24667	150	101	2	99	244	308	449	0.000147	47.4	319	24.667	47.0219
58	accA	WP_014709993.1	24306	144	97	2	99	238	308	443	0.000149	47.4	319	24.306	45.1411
59	accA	WP_045167135.1	24306	144	97	2	99	238	308	443	0.000149	47.4	319	24.306	45.1411
60	accA	WP_097550945.1	24306	144	97	2	99	238	308	443	0.000155	47.4	319	24.306	45.1411
61	accA	WP_021668366.1	24000	150	102	2	99	244	308	449	0.000155	47.4	319	24	47.0219
62	accA	WP_036882613.1	24000	150	102	2	99	244	308	449	0.00016	47	319	24	47.0219
63	accA	WP_097655880.1	24306	144	97	2	99	238	308	443	0.000163	47	319	24.306	45.1411
64	accA	CDA42745.1	26115	157	100	4	85	237	311	455	0.000166	47	319	26.115	49.2163
65	accA	WP_107582551.1	24000	150	102	2	99	244	308	449	0.000172	47	319	24	47.0219
66	accA	WP_153095859.1	24667	150	101	2	99	244	308	449	0.000175	47	319	24.667	47.0219
67	accA	WP_024989214.1	25217	115	78	1	99	213	308	414	0.000175	47	319	25.217	36.0502
68	accA	WP_134844060.1	24667	150	101	2	99	244	308	449	0.00018	47	319	24.667	47.0219
69	accA	WP_117692788.1	24667	150	101	2	99	244	308	449	0.00018	47	319	24.667	47.0219
70	accA	WP_089544577.1	24667	150	101	2	99	244	308	449	0.000181	47	319	24.667	47.0219
71	accA	CDA54872.1	24667	150	101	2	99	244	308	449	0.000183	47	319	24.667	47.0219
72	accA	WP_153082034.1	24667	150	101	2	99	244	308	449	0.000183	47	319	24.667	47.0219
73	accA	WP_006846888.1	24667	150	101	2	99	244	308	449	0.000183	47	319	24.667	47.0219
74	accA	WP_118151893.1	24667	150	101	2	99	244	308	449	0.000183	47	319	24.667	47.0219
75	accA	WP_118065415.1	24667	150	101	2	99	244	308	449	0.000185	47	319	24.667	47.0219
76	accA	WP_118116975.1	24667	150	101	2	99	244	308	449	0.000185	47	319	24.667	47.0219
77	accA	WP_004355186.1	24000	150	102	2	99	244	308	449	0.000186	47	319	24	47.0219
78	accA	WP_048740421.1	23611	144	98	2	99	238	308	443	0.000186	47	319	23.611	45.1411
79	accA	WP_036861974.1	23611	144	98	2	99	238	308	443	0.000186	47	319	23.611	45.1411
80	accA	WP_153093362.1	24667	150	101	2	99	244	308	449	0.00019	47	319	24.667	47.0219
81	accA	WP_022252633.1	24667	150	101	2	99	244	308	449	0.00019	47	319	24.667	47.0219
82	accA	MBD9058019.1	32000	75	43	1	99	173	308	374	0.000192	46.6	319	32	23.511
83	accA	WP_153091486.1	24667	150	101	2	99	244	308	449	0.000195	47	319	24.667	47.0219
84	accA	WP_117726979.1	24667	150	101	2	99	244	308	449	0.000198	47	319	24.667	47.0219
85	accA	WP_117661639.1	24667	150	101	2	99	244	308	449	0.000198	47	319	24.667	47.0219
86	accA	WP_100022379.1	23611	144	98	2	99	238	308	443	0.0002	47	319	23.611	45.1411
87	accA	WP_021589703.1	24000	150	102	2	99	244	308	449	0.0002	47	319	24	47.0219
88	accA	WP_004338671.1	23611	144	98	2	99	238	308	443	0.000207	46.6	319	23.611	45.1411
89	accA	WP_119249223.1	24667	150	101	2	99	244	308	449	0.000215	46.6	319	24.667	47.0219
90	accA	WP_118311229.1	24667	150	101	2	99	244	308	449	0.000215	46.6	319	24.667	47.0219
91	accA	WP_153133898.1	32000	75	43	1	99	173	308	374	0.000215	46.6	319	32	23.511
92	accA	WP_153085463.1	24667	150	101	2	99	244	308	449	0.000217	46.6	319	24.667	47.0219
93	accA	MBD9059638.1	32000	75	43	1	99	173	308	374	0.000222	46.6	319	32	23.511
94	accA	WP_117586267.1	24667	150	101	2	99	244	308	449	0.000224	46.6	319	24.667	47.0219
95	accA	WP_027444498.1	24000	150	102	2	99	244	308	449	0.000228	46.6	319	24	47.0219
96	accA	MBD9074068.1	32000	75	43	1	99	173	308	374	0.00023	46.6	319	32	23.511
97	accA	WP_153129293.1	32000	75	43	1	99	173	308	374	0.000236	46.6	319	32	23.511
98	accA	CCY80814.1	27778	180	109	7	70	241	279	445	0.000241	46.6	319	27.778	56.4263
99	accA	WP_028909936.1	25217	115	78	1	99	213	308	414	0.000241	46.6	319	25.217	36.0502
100	accA	CDA93888.1	25217	115	78	1	99	213	308	414	0.000247	46.6	319	25.217	36.0502
101	accA	WP_107624450.1	24096	166	102	4	99	262	308	451	0.000254	46.6	319	24.096	52.0376
102	accA	WP_025003163.1	24699	166	111	3	99	260	308	463	0.000268	46.6	319	24.699	52.0376
103	accA	WP_025072713.1	23718	156	105	3	99	250	308	453	0.000268	46.6	319	23.718	48.9028
104	accA	WP_004359500.1	24096	166	102	4	99	262	308	451	0.00027	46.6	319	24.096	52.0376
105	accA	WP_036865057.1	24096	166	102	4	99	262	308	451	0.000273	46.6	319	24.096	52.0376
106	accA	WP_025790496.1	24096	166	102	4	99	262	308	451	0.00028	46.2	319	24.096	52.0376
107	accA	WP_028896320.1	24000	150	92	2	99	248	308	435	0.000283	46.2	319	24	47.0219
108	accA	WP_135939915.1	25217	115	78	1	99	213	308	414	0.000288	46.2	319	25.217	36.0502
109	accA	WP_008822434.1	24096	166	102	4	99	262	308	451	0.00029	46.2	319	24.096	52.0376
110	accA	WP_155716516.1	23611	144	98	2	99	238	308	443	0.000293	46.2	319	23.611	45.1411
111	accA	WP_009434033.1	23611	144	98	2	99	238	308	443	0.000293	46.2	319	23.611	45.1411
112	accA	WP_004383628.1	23611	144	98	2	99	238	308	443	0.000303	46.2	319	23.611	45.1411
113	accA	WP_036927130.1	23718	156	105	3	99	250	308	453	0.000306	46.2	319	23.718	48.9028
114	accA	WP_103003371.1	23718	156	105	3	99	250	308	453	0.000306	46.2	319	23.718	48.9028
115	accA	WP_092111214.1	25217	115	78	1	99	213	308	414	0.000312	46.2	319	25.217	36.0502
116	accA	WP_008121815.1	23718	156	105	3	99	250	308	453	0.000323	46.2	319	23.718	48.9028
117	accA	WP_107621576.1	25217	115	78	1	99	213	308	414	0.000337	46.2	319	25.217	36.0502
118	accA	WP_022317092.1	24306	144	97	2	99	238	308	443	0.000349	46.2	319	24.306	45.1411
119	accA	MBD9229104.1	30667	75	44	1	99	173	308	374	0.000353	46.2	319	30.667	23.511
120	accA	HBN47212.1	24623	199	125	6	20	213	236	414	0.000353	46.2	319	24.623	62.3824
121	accA	WP_005846144.1	30667	75	44	1	99	173	308	374	0.000359	46.2	319	30.667	23.511
122	accA	WP_120175468.1	24096	166	102	4	99	262	308	451	0.000362	46.2	319	24.096	52.0376
123	accA	WP_021583959.1	26087	115	77	1	99	213	308	414	0.000365	45.8	319	26.087	36.0502
124	accA	ERT62117.1	25217	115	78	1	99	213	312	418	0.000387	45.8	319	25.217	36.0502
125	accA	WP_130828988.1	30667	75	44	1	99	173	308	374	0.000407	45.8	319	30.667	23.511
126	accA	MBD8997520.1	25217	115	78	1	99	213	308	414	0.000412	45.8	319	25.217	36.0502
127	accA	WP_007574269.1	30667	75	44	1	99	173	308	374	0.000414	45.8	319	30.667	23.511
128	accA	WP_036878404.1	25217	115	78	1	99	213	308	414	0.000414	45.8	319	25.217	36.0502
129	accA	WP_004350058.1	25217	115	78	1	99	213	308	414	0.000417	45.8	319	25.217	36.0502
130	accA	WP_102697128.1	25217	115	78	1	99	213	308	414	0.000417	45.8	319	25.217	36.0502
131	accA	WP_021671542.1	24096	166	102	4	99	262	308	451	0.000417	45.8	319	24.096	52.0376
132	accA	WP_036872412.1	25217	115	78	1	99	213	308	414	0.000417	45.8	319	25.217	36.0502
133	accA	WP_094399941.1	30667	75	44	1	99	173	308	374	0.000417	45.8	319	30.667	23.511
134	accA	WP_050696287.1	24096	166	102	4	99	262	308	451	0.000421	45.8	319	24.096	52.0376
135	accA	MBA7488393.1	28972	107	61	3	70	173	280	374	0.000421	45.8	319	28.972	33.5423
136	accA	WP_029216528.1	23611	144	98	2	99	238	308	443	0.000429	45.8	319	23.611	45.1411
137	accA	WP_036854378.1	23611	144	98	2	99	238	308	443	0.000433	45.8	319	23.611	45.1411
138	accA	CCY15918.1	24444	180	118	5	85	260	298	463	0.000443	45.8	319	24.444	56.4263
139	accA	WP_004353470.1	23611	144	98	2	99	238	308	443	0.000448	45.8	319	23.611	45.1411
140	accA	MBB1529653.1	28972	107	61	3	70	173	280	374	0.000452	45.8	319	28.972	33.5423
141	accA	WP_007366289.1	23611	144	98	2	99	238	308	443	0.000456	45.8	319	23.611	45.1411
142	accA	RKW62585.1	30667	75	44	1	99	173	308	374	0.000456	45.4	319	30.667	23.511
143	accA	MBB1539616.1	28972	107	61	3	70	173	280	374	0.000468	45.8	319	28.972	33.5423
144	accA	WP_094388266.1	24000	150	102	2	99	244	308	449	0.000468	45.8	319	24	47.0219
145	accA	WP_021992315.1	25581	129	84	2	85	213	298	414	0.000484	45.4	319	25.581	40.4389
146	accA	WP_009161508.1	30667	75	44	1	99	173	308	374	0.000485	45.4	319	30.667	23.511
147	accA	RKW61603.1	30667	75	44	1	99	173	34	100	0.000487	44.7	319	30.667	23.511
148	accA	CCY64219.1	24667	150	101	2	99	244	308	449	0.000492	45.4	319	24.667	47.0219
149	accA	HAG33109.1	24000	150	102	2	99	244	308	449	0.000521	45.4	319	24	47.0219
150	accA	WP_022311082.1	24000	150	102	2	99	244	308	449	0.000526	45.4	319	24	47.0219
151	accA	WP_172345150.1	26087	115	77	1	99	213	308	414	0.000529	45.4	319	26.087	36.0502
152	accA	WP_094422182.1	24000	150	102	2	99	244	308	449	0.000535	45.4	319	24	47.0219
153	accA	WP_036895935.1	30667	75	44	1	99	173	308	374	0.000617	45.4	319	30.667	23.511
154	accA	WP_021854126.1	26087	115	77	1	99	213	308	414	0.00062	45.4	319	26.087	36.0502
155	accA	WP_018361377.1	30667	75	44	1	99	173	308	374	0.000626	45.4	319	30.667	23.511
156	accA	WP_007174224.1	30667	75	44	1	99	173	308	374	0.000633	45.4	319	30.667	23.511
157	accA	HCJ47255.1	30667	75	44	1	99	173	308	374	0.000639	45.4	319	30.667	23.511
158	accA	WP_025877481.1	29333	75	45	1	99	173	308	374	0.00065	45.1	319	29.333	23.511
159	accA	WP_009227727.1	30667	75	44	1	99	173	308	374	0.000654	45.1	319	30.667	23.511
160	accA	WP_004376119.1	30667	75	44	1	99	173	308	374	0.000656	45.1	319	30.667	23.511
161	accA	WP_091825767.1	30667	75	44	1	99	173	308	374	0.000656	45.1	319	30.667	23.511
162	accA	WP_004370946.1	30667	75	44	1	99	173	308	374	0.000668	45.1	319	30.667	23.511
163	accA	WP_060941507.1	29333	75	45	1	99	173	308	374	0.000674	45.1	319	29.333	23.511
164	accA	WP_036891721.1	30667	75	44	1	99	173	308	374	0.00068	45.1	319	30.667	23.511
165	accA	WP_036891721.1	23529	221	128	9	25	229	1	196	6.1	32.7	319	23.529	69.279
166	accA	WP_006952475.1	22917	144	99	2	99	238	308	443	0.000698	45.1	319	22.917	45.1411
167	accA	CCX66847.1	23611	144	98	2	99	238	308	443	0.000702	45.1	319	23.611	45.1411
168	accA	WP_110370343.1	30667	75	44	1	99	173	308	374	0.000756	45.1	319	30.667	23.511
169	accA	CCY80472.1	26087	115	77	1	99	213	308	414	0.000767	45.1	319	26.087	36.0502
170	accA	WP_009235344.1	30667	75	44	1	99	173	308	374	0.000783	45.1	319	30.667	23.511
171	accA	WP_007133823.1	30667	75	44	1	99	173	308	374	0.000797	45.1	319	30.667	23.511
172	accA	WP_008566496.1	30667	75	44	1	99	173	308	374	0.000804	45.1	319	30.667	23.511
173	accA	WP_019967565.1	30667	75	44	1	99	173	308	374	0.000811	45.1	319	30.667	23.511
174	accA	WP_028898689.1	23333	150	103	2	99	244	308	449	0.000818	45.1	319	23.333	47.0219
175	accA	WP_070722707.1	30667	75	44	1	99	173	308	374	0.000826	45.1	319	30.667	23.511
176	accA	WP_008450489.1	22222	144	100	2	99	238	308	443	0.000826	45.1	319	22.222	45.1411
177	accA	WP_018966293.1	30667	75	44	1	99	173	308	374	0.000833	45.1	319	30.667	23.511
178	accA	WP_009229806.1	30667	75	44	1	99	173	308	374	0.00084	45.1	319	30.667	23.511
179	accA	WP_060933431.1	22222	144	100	2	99	238	308	443	0.00084	45.1	319	22.222	45.1411
180	accA	WP_104368888.1	25217	115	78	1	99	213	308	414	0.000863	44.7	319	25.217	36.0502
181	accA	WP_004379732.1	23333	150	103	2	99	244	308	449	0.000871	44.7	319	23.333	47.0219
182	accA	WP_025070794.1	22667	150	104	2	99	244	308	449	0.000886	44.7	319	22.667	47.0219
183	accA	WP_023983265.1	30667	75	44	1	99	173	308	374	0.001	44.7	319	30.667	23.511
184	accA	WP_004370328.1	30667	75	44	1	99	173	308	374	0.001	44.7	319	30.667	23.511
185	accA	WP_115154242.1	25217	115	78	1	99	213	308	414	0.001	44.3	319	25.217	36.0502
186	accA	WP_048799615.1	30667	75	44	1	99	173	308	374	0.001	43.9	319	30.667	23.511
187	accA	QJR97971.1	25217	115	78	1	99	213	308	414	0.001	44.3	319	25.217	36.0502
188	accA	WP_116616744.1	30667	75	44	1	99	173	308	374	0.001	44.3	319	30.667	23.511
189	accA	WP_116616744.1	23529	221	128	9	25	229	1	196	6.4	32.7	319	23.529	69.279
190	accA	WP_004346741.1	25217	115	78	1	99	213	308	414	0.001	44.3	319	25.217	36.0502
191	accA	WP_004342362.1	25217	115	78	1	99	213	308	414	0.001	44.3	319	25.217	36.0502
192	accA	WP_025001736.1	22892	166	104	4	99	262	308	451	0.001	44.3	319	22.892	52.0376
193	accA	HAT62520.1	24348	115	79	1	99	213	308	414	0.001	44.3	319	24.348	36.0502
194	accA	CCY01492.1	24348	115	79	1	99	213	23	129	0.002	43.1	319	24.348	36.0502
195	accA	WP_172173808.1	24348	115	79	1	99	213	308	414	0.002	43.5	319	24.348	36.0502
196	accA	WP_118866830.1	22917	144	99	2	99	238	308	443	0.004	42.7	319	22.917	45.1411
197	accA	WP_094385582.1	24348	115	79	1	99	213	308	414	0.004	42.7	319	24.348	36.0502
198	accA	WP_094381169.1	24348	115	79	1	99	213	308	414	0.004	42.7	319	24.348	36.0502
199	accA	HCN53655.1	25217	115	78	1	99	213	308	414	0.004	42.7	319	25.217	36.0502
200	accA	MQO84094.1	25000	108	77	1	141	244	15	122	0.02	39.7	319	25	33.8558
201	accA	WP_125233724.1	28571	77	44	2	9	74	46	122	0.24	37	319	28.571	24.1379
202	accA	WP_180970826.1	24096	83	51	3	3	74	42	123	1.4	34.7	319	24.096	26.0188
203	accA	WP_025001671.1	24342	152	86	7	9	138	46	190	1.4	34.3	319	24.342	47.6489
204	accA	PMC24166.1	24096	83	51	3	3	74	41	122	1.4	34.7	319	24.096	26.0188
205	accA	WP_006848585.1	36842	57	34	1	105	159	447	503	2.1	34.3	319	36.842	17.8683
206	accA	WP_023925338.1	25974	77	46	2	9	74	46	122	3	33.5	319	25.974	24.1379
207	accA	RKW57166.1	25974	77	46	2	9	74	46	122	3	33.5	319	25.974	24.1379
208	accA	WP_004362219.1	25974	77	46	2	9	74	46	122	3	33.5	319	25.974	24.1379
209	accA	WP_118354560.1	28916	83	47	3	3	74	41	122	4.4	32.7	319	28.916	26.0188
210	accA	MBD8938077.1	28916	83	47	3	3	74	41	122	5	32.7	319	28.916	26.0188
211	accA	WP_007899969.1	28916	83	47	3	3	74	41	122	5.1	32.7	319	28.916	26.0188
212	accA	WP_088437789.1	28205	78	43	3	9	74	46	122	5.5	32.7	319	28.205	24.4514
213	accA	WP_100022349.1	28205	78	43	3	9	74	46	122	5.5	32.7	319	28.205	24.4514
214	accA	WP_036856979.1	27068	133	75	6	73	193	106	228	6	32.3	319	27.068	41.6928
215	accA	WP_005845626.1	28846	52	37	0	206	257	257	308	6.2	32.7	319	28.846	16.3009
216	accA	WP_027952539.1	28846	52	37	0	206	257	257	308	6.2	32.7	319	28.846	16.3009
217	accA	WP_099983380.1	28205	78	43	3	9	74	46	122	6.2	32.3	319	28.205	24.4514
218	accA	WP_118867145.1	27068	133	75	6	73	193	106	228	6.3	32.3	319	27.068	41.6928
219	accA	WP_158463603.1	25455	110	65	4	210	308	100	203	6.4	32.3	319	25.455	34.4828
220	accA	WP_025068205.1	27068	133	75	6	73	193	106	228	6.4	32.3	319	27.068	41.6928
221	accA	WP_013671778.1	27068	133	75	6	73	193	106	228	6.4	32.3	319	27.068	41.6928
222	accA	WP_099976401.1	28205	78	43	3	9	74	46	122	7.7	32	319	28.205	24.4514
223	accA	WP_099995743.1	28205	78	43	3	9	74	46	122	7.7	32	319	28.205	24.4514
224	accB	WP_028909937.1	48810	84	36	1	73	156	68	144	1.16e-15	72.8	156	48.81	53.8462
225	accB	WP_008822432.1	40000	130	63	4	34	156	21	142	2.88e-14	68.9	156	40	83.3333
226	accB	WP_007574271.1	34815	135	74	4	28	156	16	142	3.24e-14	68.9	156	34.815	86.5385
227	accB	WP_021589713.1	45263	95	43	2	64	156	54	141	4.18e-14	68.6	156	45.263	60.8974
228	accB	WP_091825771.1	46237	93	42	2	65	156	57	142	4.37e-14	68.6	156	46.237	59.6154
229	accB	WP_025799767.1	35593	118	68	2	40	156	33	143	5.41e-14	68.2	156	35.593	75.641
230	accB	WP_007366287.1	47619	84	37	1	73	156	66	142	1.09e-13	67.4	156	47.619	53.8462
231	accB	RKW53437.1	44872	78	36	1	79	156	35	105	1.11e-13	66.6	156	44.872	50
232	accB	MBA7488395.1	34783	138	65	3	31	156	19	143	1.22e-13	67.4	156	34.783	88.4615
233	accB	WP_006846890.1	39231	130	54	3	39	156	25	141	1.39e-13	67	156	39.231	83.3333
234	accB	WP_130828990.1	43000	100	43	2	57	156	57	142	1.39e-13	67.4	156	43	64.1026
235	accB	WP_077195867.1	44706	85	40	1	72	156	65	142	1.39e-13	67.4	156	44.706	54.4872
236	accB	WP_050696286.1	47619	84	37	1	73	156	66	142	1.67e-13	67	156	47.619	53.8462
237	accB	WP_096405091.1	39316	117	63	2	40	156	34	142	1.67e-13	67	156	39.316	75
238	accB	WP_013265101.1	47619	84	37	1	73	156	66	142	1.7e-13	67	156	47.619	53.8462
239	accB	WP_089366813.1	47619	84	37	1	73	156	66	142	1.81e-13	67	156	47.619	53.8462
240	accB	WP_100020796.1	39655	116	62	2	41	156	35	142	1.81e-13	67	156	39.655	74.359
241	accB	WP_061869441.1	39655	116	62	2	41	156	35	142	2.02e-13	66.6	156	39.655	74.359
242	accB	WP_045167136.1	39655	116	62	2	41	156	35	142	2.08e-13	66.6	156	39.655	74.359
243	accB	WP_036865055.1	47619	84	37	1	73	156	66	142	2.31e-13	66.6	156	47.619	53.8462
244	accB	WP_099891347.1	39655	116	62	2	41	156	35	142	2.34e-13	66.6	156	39.655	74.359
245	accB	WP_124139862.1	39655	116	62	2	41	156	35	142	2.49e-13	66.6	156	39.655	74.359
246	accB	HCJ47256.1	43750	96	44	3	61	156	58	143	2.49e-13	66.6	156	43.75	61.5385
247	accB	WP_004370948.1	40952	105	48	2	52	156	51	141	2.83e-13	66.2	156	40.952	67.3077
248	accB	WP_004359501.1	47619	84	37	1	73	156	66	142	2.92e-13	66.2	156	47.619	53.8462
249	accB	WP_088437822.1	39655	116	62	2	41	156	35	142	3.08e-13	66.2	156	39.655	74.359
250	accB	WP_099983346.1	48235	85	36	2	72	156	66	142	3.18e-13	66.2	156	48.235	54.4872
251	accB	WP_004376117.1	40952	105	48	2	52	156	51	141	3.25e-13	66.2	156	40.952	67.3077
252	accB	WP_004366216.1	40385	104	49	2	53	156	52	142	3.39e-13	66.2	156	40.385	66.6667
253	accB	WP_006952473.1	42857	98	42	2	59	156	60	143	3.43e-13	66.2	156	42.857	62.8205
254	accB	MBD9015838.1	38462	130	55	3	39	156	14	130	3.46e-13	65.9	156	38.462	83.3333
255	accB	WP_070668043.1	40952	105	48	2	52	156	51	141	3.61e-13	66.2	156	40.952	67.3077
256	accB	WP_036869039.1	47619	84	37	1	73	156	66	142	3.69e-13	66.2	156	47.619	53.8462
257	accB	WP_025839864.1	46429	84	38	1	73	156	66	142	3.77e-13	66.2	156	46.429	53.8462
258	accB	WP_006044882.1	32051	156	85	5	1	156	8	142	3.98e-13	65.9	156	32.051	100
259	accB	WP_004362717.1	40385	104	49	2	53	156	52	142	4.15e-13	65.9	156	40.385	66.6667
260	accB	WP_024999232.1	33333	156	83	5	1	156	8	142	4.19e-13	65.9	156	33.333	100
261	accB	WP_100015902.1	48235	85	36	2	72	156	66	142	4.42e-13	65.9	156	48.235	54.4872
262	accB	WP_097648364.1	48235	85	36	2	72	156	66	142	4.61e-13	65.9	156	48.235	54.4872
263	accB	WP_022120280.1	38462	130	55	3	39	156	25	141	4.86e-13	65.9	156	38.462	83.3333
264	accB	WP_004355351.1	44872	78	36	1	79	156	72	142	4.92e-13	65.9	156	44.872	50
265	accB	WP_097655881.1	48235	85	36	2	72	156	66	142	4.92e-13	65.9	156	48.235	54.4872
266	accB	WP_028896321.1	44706	85	39	2	72	156	65	141	4.97e-13	65.9	156	44.706	54.4872
267	accB	WP_144150812.1	40206	97	51	1	59	155	65	154	5.22e-13	65.9	156	40.206	62.1795
268	accB	WP_023926102.1	40385	104	49	2	53	156	52	142	5.52e-13	65.5	156	40.385	66.6667
269	accB	WP_100189176.1	40385	104	49	2	53	156	52	142	5.58e-13	65.5	156	40.385	66.6667
270	accB	WP_100370319.1	47368	76	33	1	81	156	74	142	6.14e-13	65.5	156	47.368	48.7179
271	accB	WP_097550946.1	56061	66	27	1	93	156	77	142	6.54e-13	65.5	156	56.061	42.3077
272	accB	WP_099995779.1	47059	85	37	2	72	156	66	142	7.28e-13	65.5	156	47.059	54.4872
273	accB	WP_018920352.1	40000	105	49	2	52	156	51	141	7.51e-13	65.5	156	40	67.3077
274	accB	WP_022111025.1	37692	130	56	3	39	156	25	141	7.59e-13	65.1	156	37.692	83.3333
275	accB	CCY80474.1	40196	102	47	2	55	156	56	143	8.18e-13	65.1	156	40.196	65.3846
276	accB	WP_025001737.1	45349	86	40	1	71	156	64	142	8.26e-13	65.1	156	45.349	55.1282
277	accB	WP_022252631.1	39837	123	62	4	39	156	25	140	8.43e-13	65.1	156	39.837	78.8462
278	accB	WP_021826523.1	42553	94	46	2	64	156	55	141	9.09e-13	65.1	156	42.553	60.2564
279	accB	WP_091958860.1	61111	54	21	0	103	156	90	143	9.19e-13	65.1	156	61.111	34.6154
280	accB	WP_100022378.1	38793	116	63	2	41	156	35	142	1.05e-12	65.1	156	38.793	74.359
281	accB	WP_100014289.1	39130	115	62	2	41	155	35	141	1.15e-12	64.7	156	39.13	73.7179
282	accB	WP_120175469.1	45238	84	39	1	73	156	66	142	1.24e-12	64.7	156	45.238	53.8462
283	accB	WP_025790498.1	46429	84	38	1	73	156	66	142	1.26e-12	64.7	156	46.429	53.8462
284	accB	WP_106812712.1	36885	122	59	3	40	156	33	141	1.32e-12	64.7	156	36.885	78.2051
285	accB	WP_028901856.1	36752	117	66	2	40	156	34	142	1.32e-12	64.7	156	36.752	75
286	accB	WP_007133825.1	42553	94	46	2	64	156	55	141	1.39e-12	64.7	156	42.553	60.2564
287	accB	HAT62519.1	45882	85	38	2	73	156	65	142	1.61e-12	64.3	156	45.882	54.4872
288	accB	WP_021854128.1	38235	102	49	2	55	156	56	143	1.63e-12	64.3	156	38.235	65.3846
289	accB	MBB1539618.1	33835	133	73	3	31	156	19	143	1.7e-12	64.3	156	33.835	85.2564
290	accB	MBB1539618.1	33835	133	73	3	31	156	19	143	1.7e-12	64.3	156	33.835	85.2564
291	accB	WP_153137704.1	37692	130	56	3	39	156	25	141	1.72e-12	64.3	156	37.692	83.3333
292	accB	WP_107624449.1	48649	74	31	1	83	156	76	142	1.79e-12	64.3	156	48.649	47.4359
293	accB	WP_107582552.1	43590	78	37	1	79	156	71	141	1.83e-12	64.3	156	43.59	50
294	accB	WP_004379730.1	59259	54	22	0	103	156	90	143	1.93e-12	64.3	156	59.259	34.6154
295	accB	WP_009010582.1	46429	84	38	1	73	156	66	142	1.99e-12	64.3	156	46.429	53.8462
296	accB	WP_018462279.1	44048	84	40	1	73	156	66	142	2.03e-12	64.3	156	44.048	53.8462
297	accB	WP_021671540.1	47436	78	34	1	79	156	72	142	2.05e-12	64.3	156	47.436	50
298	accB	MBB1529651.1	33835	133	73	3	31	156	19	143	2.17e-12	64.3	156	33.835	85.2564
299	accB	WP_060941506.1	46053	76	34	1	81	156	74	142	2.19e-12	63.9	156	46.053	48.7179
300	accB	WP_004350056.1	36449	107	53	3	51	156	48	140	2.28e-12	63.9	156	36.449	68.5897
301	accB	WP_004353503.1	48649	74	31	1	83	156	76	142	2.41e-12	63.9	156	48.649	47.4359
302	accB	WP_118866831.1	48649	74	31	1	83	156	76	142	2.41e-12	63.9	156	48.649	47.4359
303	accB	WP_053398444.1	37255	102	50	2	55	156	56	143	2.46e-12	63.9	156	37.255	65.3846
304	accB	WP_019035705.1	46154	78	35	1	79	156	71	141	2.62e-12	63.9	156	46.154	50
305	accB	WP_099976433.1	38793	116	63	2	41	156	35	142	2.85e-12	63.9	156	38.793	74.359
306	accB	WP_008450293.1	46154	78	35	1	79	156	71	141	2.88e-12	63.9	156	46.154	50
307	accB	WP_107621575.1	36290	124	66	3	39	156	26	142	2.91e-12	63.9	156	36.29	79.4872
308	accB	WP_028906285.1	38793	116	63	2	41	156	35	142	3.41e-12	63.5	156	38.793	74.359
309	accB	WP_023056745.1	36449	107	53	3	51	156	48	140	3.49e-12	63.5	156	36.449	68.5897
310	accB	WP_014709991.1	42308	104	47	3	53	156	52	142	4.44e-12	63.2	156	42.308	66.6667
311	accB	MBD8997519.1	41176	102	49	3	55	156	52	142	4.59e-12	63.2	156	41.176	65.3846
312	accB	WP_006282295.1	61111	54	21	0	103	156	88	141	4.59e-12	63.2	156	61.111	34.6154
313	accB	WP_102696922.1	36449	107	53	3	51	156	48	140	4.59e-12	63.2	156	36.449	68.5897
314	accB	MBD9298896.1	39048	105	51	2	52	156	50	141	4.69e-12	63.2	156	39.048	67.3077
315	accB	WP_027453724.1	61111	54	21	0	103	156	88	141	4.69e-12	63.2	156	61.111	34.6154
316	accB	WP_036861971.1	44872	78	36	1	79	156	71	141	4.69e-12	63.2	156	44.872	50
317	accB	WP_021583960.1	42157	102	44	2	55	156	56	142	4.79e-12	63.2	156	42.157	65.3846
318	accB	WP_004338669.1	44872	78	36	1	79	156	71	141	4.99e-12	63.2	156	44.872	50
319	accB	WP_024991352.1	42105	95	48	1	62	156	55	142	5.43e-12	63.2	156	42.105	60.8974
320	accB	WP_024989215.1	59259	54	22	0	103	156	88	141	8.38e-12	62.4	156	59.259	34.6154
321	accB	WP_004383626.1	59259	54	22	0	103	156	89	142	8.74e-12	62.4	156	59.259	34.6154
322	accB	WP_028898690.1	47297	74	32	1	83	156	77	143	9.31e-12	62.4	156	47.297	47.4359
323	accB	WP_078805753.1	57407	54	23	0	103	156	90	143	9.4e-12	62.4	156	57.407	34.6154
324	accB	WP_004342360.1	44048	84	40	1	73	156	64	140	9.93e-12	62.4	156	44.048	53.8462
325	accB	MBD9042342.1	53030	66	29	1	93	156	76	141	1.05e-11	62.4	156	53.03	42.3077
326	accB	EFU29480.1	44048	84	40	1	73	156	66	142	1.15e-11	62.4	156	44.048	53.8462
327	accB	MBD9200535.1	53030	66	29	1	93	156	75	140	1.21e-11	62	156	53.03	42.3077
328	accB	WP_007174226.1	43590	78	37	1	79	156	75	145	1.26e-11	62	156	43.59	50
329	accB	HBF06106.1	39048	105	51	2	52	156	50	141	1.28e-11	62	156	39.048	67.3077
330	accB	WP_009161510.1	33898	118	70	2	40	156	33	143	1.4e-11	62	156	33.898	75.641
331	accB	WP_094879567.1	44318	88	45	2	73	156	54	141	1.45e-11	62	156	44.318	56.4103
332	accB	WP_025065800.1	41053	95	49	1	62	156	55	142	1.72e-11	61.6	156	41.053	60.8974
333	accB	CCZ12123.1	44186	86	40	2	72	156	64	142	1.72e-11	61.6	156	44.186	55.1282
334	accB	WP_025003164.1	57407	54	23	0	103	156	87	140	1.99e-11	61.6	156	57.407	34.6154
335	accB	WP_094391599.1	41111	90	45	2	67	156	60	141	2.12e-11	61.6	156	41.111	57.6923
336	accB	MBD9229103.1	44186	86	40	2	72	156	64	142	2.17e-11	61.6	156	44.186	55.1282
337	accB	WP_024991139.1	35484	124	60	4	40	156	33	143	2.64e-11	61.2	156	35.484	79.4872
338	accB	WP_044079996.1	57407	54	23	0	103	156	90	143	2.64e-11	61.2	156	57.407	34.6154
339	accB	EFM00938.1	35484	124	60	4	40	156	34	144	2.84e-11	61.2	156	35.484	79.4872
340	accB	WP_008121813.1	55556	54	24	0	103	156	88	141	3.34e-11	60.8	156	55.556	34.6154
341	accB	WP_036927132.1	55556	54	24	0	103	156	88	141	3.63e-11	60.8	156	55.556	34.6154
342	accB	WP_008566498.1	43590	78	37	1	79	156	71	141	3.95e-11	60.8	156	43.59	50
343	accB	WP_036895936.1	37143	105	53	2	52	156	50	141	4.25e-11	60.8	156	37.143	67.3077
344	accB	WP_022317090.1	55556	54	24	0	103	156	90	143	4.62e-11	60.5	156	55.556	34.6154
345	accB	CCX66849.1	45946	74	33	1	83	156	77	143	4.67e-11	60.5	156	45.946	47.4359
346	accB	RKW53524.1	53704	54	25	0	103	156	23	76	4.77e-11	58.9	156	53.704	34.6154
347	accB	WP_094433912.1	39535	86	45	1	71	156	63	141	5.42e-11	60.5	156	39.535	55.1282
348	accB	WP_153097357.1	33094	139	75	3	23	156	41	166	5.49e-11	60.8	156	33.094	89.1026
349	accB	WP_092111216.1	43590	78	37	1	79	156	72	142	5.89e-11	60.5	156	43.59	50
350	accB	MBD9015759.1	40404	99	50	2	58	156	78	167	6.13e-11	60.8	156	40.404	63.4615
351	accB	WP_172173219.1	40000	95	47	3	55	146	59	146	6.33e-11	60.5	156	40	60.8974
352	accB	WP_110370342.1	41667	84	42	1	73	156	66	142	6.97e-11	60.1	156	41.667	53.8462
353	accB	WP_009235345.1	40476	84	43	1	73	156	66	142	6.97e-11	60.1	156	40.476	53.8462
354	accB	WP_009227725.1	42045	88	44	1	69	156	63	143	7.82e-11	60.1	156	42.045	56.4103
355	accB	WP_094386461.1	44156	77	36	1	79	155	79	148	7.83e-11	60.1	156	44.156	49.359
356	accB	WP_025072714.1	53704	54	25	0	103	156	88	141	1.06e-10	59.7	156	53.704	34.6154
357	accB	WP_022311084.1	42308	78	38	1	79	156	71	141	1.12e-10	59.7	156	42.308	50
358	accB	WP_172345152.1	53704	54	25	0	103	156	87	140	1.17e-10	59.7	156	53.704	34.6154
359	accB	WP_172273988.1	36364	88	49	1	59	146	61	141	1.17e-10	59.7	156	36.364	56.4103
360	accB	WP_094399944.1	57407	54	23	0	103	156	89	142	1.18e-10	59.7	156	57.407	34.6154
361	accB	WP_018361379.1	43590	78	37	1	79	156	73	143	1.23e-10	59.7	156	43.59	50
362	accB	WP_094381168.1	43590	78	37	1	79	156	71	141	2.29e-10	58.9	156	43.59	50
363	accB	WP_126677820.1	40206	97	50	3	61	156	54	143	2.67e-10	58.5	156	40.206	62.1795
364	accB	WP_044072201.1	55556	54	24	0	103	156	90	143	3e-10	58.5	156	55.556	34.6154
365	accB	WP_044064639.1	55556	54	24	0	103	156	90	143	3e-10	58.5	156	55.556	34.6154
366	accB	WP_044064639.1	55556	54	24	0	103	156	90	143	3e-10	58.5	156	55.556	34.6154
367	accB	WP_104370355.1	41758	91	45	2	56	146	62	144	3.06e-10	58.5	156	41.758	58.3333
368	accB	WP_116616745.1	41026	78	39	1	79	156	75	145	3.22e-10	58.5	156	41.026	50
369	accB	WP_116616745.1	41026	78	39	1	79	156	75	145	3.22e-10	58.5	156	41.026	50
370	accB	WP_036891719.1	37000	100	46	2	57	156	63	145	3.43e-10	58.5	156	37	64.1026
371	accB	CDA93885.1	55556	54	24	0	103	156	88	141	3.52e-10	58.2	156	55.556	34.6154
372	accB	WP_153090028.1	40404	99	50	2	58	156	76	165	3.87e-10	58.5	156	40.404	63.4615
373	accB	WP_125234569.1	55556	54	24	0	103	156	90	143	3.94e-10	58.2	156	55.556	34.6154
374	accB	WP_009229804.1	53704	54	25	0	103	156	89	142	4.77e-10	57.8	156	53.704	34.6154
375	accB	HBN47211.1	41176	85	43	1	72	156	66	143	5.07e-10	57.8	156	41.176	54.4872
376	accB	WP_019188423.1	53704	54	25	0	103	156	89	142	5.64e-10	57.8	156	53.704	34.6154
377	accB	WP_070722706.1	53704	54	25	0	103	156	89	142	5.7e-10	57.8	156	53.704	34.6154
378	accB	CCY64221.1	36559	93	51	2	64	156	59	143	5.75e-10	57.8	156	36.559	59.6154
379	accB	HCN53653.1	53704	54	25	0	103	156	89	142	7.4e-10	57.4	156	53.704	34.6154
380	accB	WP_027450072.1	41860	86	43	2	71	156	66	144	7.85e-10	57.4	156	41.86	55.1282
381	accB	WP_153129270.1	40404	99	50	2	58	156	76	165	8.26e-10	57.8	156	40.404	63.4615
382	accB	QJR97972.1	45946	74	33	1	83	156	70	136	8.83e-10	57	156	45.946	47.4359
383	accB	WP_021992317.1	53704	54	25	0	103	156	89	142	9.52e-10	57	156	53.704	34.6154
384	accB	MBD8994855.1	34307	137	71	4	23	156	42	162	9.77e-10	57.4	156	34.307	87.8205
385	accB	WP_005846140.1	51852	54	26	0	103	156	90	143	1.05e-09	57	156	51.852	34.6154
386	accB	WP_091819124.1	38095	105	55	3	52	156	50	144	1.16e-09	57	156	38.095	67.3077
387	accB	WP_092071887.1	39744	78	40	1	79	156	74	144	1.23e-09	57	156	39.744	50
388	accB	WP_094381398.1	45205	73	33	1	83	155	81	146	1.34e-09	57	156	45.205	46.7949
389	accB	WP_172173802.1	42308	78	38	1	79	156	71	141	1.5e-09	56.6	156	42.308	50
390	accB	WP_125104008.1	44318	88	39	3	68	155	72	149	1.53e-09	56.6	156	44.318	56.4103
391	accB	WP_053399231.1	44318	88	39	3	68	155	72	149	1.54e-09	56.6	156	44.318	56.4103
392	accB	WP_172275594.1	38947	95	50	2	62	156	56	142	2e-09	56.2	156	38.947	60.8974
393	accB	QIM10025.1	40404	99	56	2	57	155	517	612	2.17e-09	58.5	156	40.404	63.4615
394	accB	WP_036877127.1	50000	54	27	0	103	156	91	144	2.23e-09	56.2	156	50	34.6154
395	accB	CDE07527.1	42667	75	34	2	83	156	82	148	2.56e-09	56.2	156	42.667	48.0769
396	accB	WP_118201030.1	40260	77	39	1	79	155	91	160	2.86e-09	56.2	156	40.26	49.359
397	accB	WP_153122843.1	44156	77	36	1	79	155	84	153	3.23e-09	55.8	156	44.156	49.359
398	accB	WP_118080759.1	41558	77	38	1	79	155	91	160	3.9e-09	55.8	156	41.558	49.359
399	accB	WP_036913181.1	46269	67	29	2	80	146	82	141	3.97e-09	55.8	156	46.269	42.9487
400	accB	WP_091765967.1	46269	67	29	2	80	146	82	141	3.97e-09	55.8	156	46.269	42.9487
401	accB	CDB04494.1	51852	54	26	0	103	156	88	141	4e-09	55.5	156	51.852	34.6154
402	accB	MBD8971396.1	51852	54	26	0	103	156	105	158	4.81e-09	55.5	156	51.852	34.6154
403	accB	WP_118116966.1	51852	54	26	0	103	156	105	158	4.86e-09	55.5	156	51.852	34.6154
404	accB	WP_022111034.1	51852	54	26	0	103	156	105	158	5.34e-09	55.5	156	51.852	34.6154
405	accB	CCY66443.1	39773	88	45	2	70	156	68	148	5.89e-09	55.1	156	39.773	56.4103
406	accB	CCX68588.1	43182	88	40	3	68	155	72	149	5.91e-09	55.1	156	43.182	56.4103
407	accB	WP_117662070.1	51852	54	26	0	103	156	102	155	6.31e-09	55.1	156	51.852	34.6154
408	accB	WP_118312161.1	51852	54	26	0	103	156	102	155	6.31e-09	55.1	156	51.852	34.6154
409	accB	MBD9057561.1	51852	54	26	0	103	156	102	155	6.31e-09	55.1	156	51.852	34.6154
410	accB	WP_154482998.1	40260	77	39	1	79	155	91	160	6.76e-09	55.5	156	40.26	49.359
411	accB	WP_006846470.1	40260	77	39	1	79	155	91	160	6.76e-09	55.5	156	40.26	49.359
412	accB	CDD20284.1	51852	54	26	0	103	156	102	155	6.93e-09	55.1	156	51.852	34.6154
413	accB	MBD9259770.1	51852	54	26	0	103	156	103	156	7.35e-09	55.1	156	51.852	34.6154
414	accB	WP_104368889.1	50000	54	27	0	103	156	85	138	7.45e-09	54.7	156	50	34.6154
415	accB	WP_126677748.1	37374	99	50	2	62	155	57	148	7.78e-09	54.7	156	37.374	63.4615
416	accB	WP_089542763.1	51852	54	26	0	103	156	102	155	8.01e-09	55.1	156	51.852	34.6154
417	accB	WP_094385584.1	44595	74	34	1	83	156	76	142	9.98e-09	54.3	156	44.595	47.4359
418	accB	WP_117586355.1	49057	53	27	0	103	155	108	160	1e-08	54.7	156	49.057	33.9744
419	accB	WP_117693723.1	41558	77	38	1	79	155	85	154	1.14e-08	54.7	156	41.558	49.359
420	accB	WP_119237578.1	41558	77	38	1	79	155	85	154	1.2e-08	54.3	156	41.558	49.359
421	accB	CDC25822.1	52830	53	25	0	103	155	112	164	1.31e-08	54.7	156	52.83	33.9744
422	accB	MBD9072973.1	44444	81	38	2	75	155	91	164	1.34e-08	54.7	156	44.444	51.9231
423	accB	WP_118153233.1	41558	77	38	1	79	155	85	154	1.37e-08	54.3	156	41.558	49.359
424	accB	MBD9058780.1	41558	77	38	1	79	155	91	160	1.41e-08	54.3	156	41.558	49.359
425	accB	HCD64952.1	44444	81	38	2	75	155	91	164	1.88e-08	54.3	156	44.444	51.9231
426	accB	CCX67547.1	38824	85	45	1	71	155	72	149	1.91e-08	53.9	156	38.824	54.4872
427	accB	WP_004370324.1	50000	52	26	0	105	156	90	141	2.1e-08	53.5	156	50	33.3333
428	accB	MBD9087262.1	41558	77	38	1	79	155	97	166	2.15e-08	53.9	156	41.558	49.359
429	accB	WP_023983267.1	50000	52	26	0	105	156	90	141	2.16e-08	53.5	156	50	33.3333
430	accB	WP_118415261.1	40260	77	39	1	79	155	91	160	2.22e-08	53.9	156	40.26	49.359
431	accB	WP_153084424.1	49057	53	27	0	103	155	108	160	2.34e-08	53.9	156	49.057	33.9744
432	accB	WP_153086533.1	49057	53	27	0	103	155	108	160	2.34e-08	53.9	156	49.057	33.9744
433	accB	WP_153081550.1	49057	53	27	0	103	155	108	160	2.46e-08	53.9	156	49.057	33.9744
434	accB	WP_022121789.1	49057	53	27	0	103	155	108	160	2.49e-08	53.9	156	49.057	33.9744
435	accB	CCY01490.1	50000	54	27	0	103	156	89	142	2.55e-08	53.5	156	50	34.6154
436	accB	WP_118140290.1	49057	53	27	0	103	155	108	160	3.09e-08	53.5	156	49.057	33.9744
437	accB	MBD9260621.1	52830	53	25	0	103	155	112	164	3.15e-08	53.5	156	52.83	33.9744
438	accB	WP_158462770.1	52830	53	25	0	103	155	112	164	3.32e-08	53.5	156	52.83	33.9744
439	accB	WP_153118808.1	49057	53	27	0	103	155	102	154	3.52e-08	53.1	156	49.057	33.9744
440	accB	WP_028913291.1	50980	51	25	0	106	156	92	142	3.59e-08	53.1	156	50.98	32.6923
441	accB	WP_153088366.1	49057	53	27	0	103	155	108	160	4.25e-08	53.1	156	49.057	33.9744
442	accB	WP_094436443.1	44444	63	28	1	79	141	81	136	5.31e-08	52.8	156	44.444	40.3846
443	accB	WP_094390084.1	44444	63	28	1	79	141	81	136	5.31e-08	52.8	156	44.444	40.3846
444	accB	QJR97968.1	35714	98	51	2	58	155	63	148	6.45e-08	52.4	156	35.714	62.8205
445	accB	QNT65979.1	47170	53	28	0	103	155	108	160	7.72e-08	52.4	156	47.17	33.9744
446	accB	WP_036912324.1	30709	127	70	4	39	156	25	142	8.67e-08	52	156	30.709	81.4103
447	accB	CDE40955.1	50000	54	27	0	103	156	91	144	9.45e-08	52	156	50	34.6154
448	accB	WP_103915873.1	29921	127	71	4	39	156	25	142	1.28e-07	51.6	156	29.921	81.4103
449	accB	WP_172181176.1	31884	138	77	3	18	155	24	144	1.58e-07	51.2	156	31.884	88.4615
450	accB	WP_027450556.1	46875	64	27	2	83	146	89	145	1.85e-07	51.2	156	46.875	41.0256
451	accB	WP_073210218.1	43939	66	35	1	93	156	77	142	2.68e-07	50.4	156	43.939	42.3077
452	accB	WP_028903586.1	50980	51	25	0	106	156	92	142	2.91e-07	50.4	156	50.98	32.6923
453	accB	WP_091841889.1	49020	51	26	0	106	156	92	142	2.94e-07	50.4	156	49.02	32.6923
454	accB	ADE83630.1	49020	51	26	0	106	156	106	156	3.05e-07	50.8	156	49.02	32.6923
455	accB	WP_028908504.1	49020	51	26	0	106	156	92	142	3.09e-07	50.4	156	49.02	32.6923
456	accB	WP_091899546.1	47059	51	27	0	106	156	93	143	3.25e-07	50.4	156	47.059	32.6923
457	accB	WP_091823469.1	30625	160	82	5	1	155	15	150	3.77e-07	50.4	156	30.625	102.564
458	accB	WP_091815863.1	43333	60	32	1	89	146	86	145	4.97e-07	50.1	156	43.333	38.4615
459	accB	CCY80371.1	43836	73	34	2	83	155	83	148	5.18e-07	50.1	156	43.836	46.7949
460	accB	WP_073043905.1	41176	68	33	2	79	146	80	140	6.73e-07	49.7	156	41.176	43.5897
461	accB	WP_074761489.1	41176	68	33	2	79	146	80	140	7.08e-07	49.7	156	41.176	43.5897
462	accB	WP_013063260.1	41176	68	33	2	79	146	80	140	7.08e-07	49.7	156	41.176	43.5897
463	accB	WP_074832883.1	41176	68	33	2	79	146	80	140	8.43e-07	49.3	156	41.176	43.5897
464	accB	WP_033149803.1	41176	68	33	2	79	146	80	140	9.16e-07	49.3	156	41.176	43.5897
465	accB	WP_022317253.1	42623	61	35	0	95	155	91	151	9.63e-07	49.3	156	42.623	39.1026
466	accB	WP_091843958.1	52273	44	21	0	103	146	98	141	9.89e-07	49.3	156	52.273	28.2051
467	accB	WP_092067916.1	39706	68	34	1	79	146	81	141	1.05e-06	49.3	156	39.706	43.5897
468	accB	WP_036877865.1	41176	68	33	1	79	146	78	138	1.86e-06	48.5	156	41.176	43.5897
469	accB	WP_028903111.1	41176	68	33	2	79	146	80	140	2.28e-06	48.1	156	41.176	43.5897
470	accB	WP_028911782.1	38235	68	35	2	79	146	80	140	9.13e-06	46.6	156	38.235	43.5897
471	accB	WP_091899792.1	39706	68	34	2	79	146	80	140	1.07e-05	46.6	156	39.706	43.5897
472	accB	WP_092111458.1	38750	80	42	1	76	155	77	149	1.23e-05	46.2	156	38.75	51.2821
473	accB	WP_107620031.1	39286	84	44	1	72	155	73	149	1.4e-05	46.2	156	39.286	53.8462
474	accB	WP_006948406.1	32653	147	76	6	1	146	15	139	1.89e-05	45.8	156	32.653	94.2308
475	accB	WP_007896898.1	50909	55	21	1	108	156	87	141	2.27e-05	45.4	156	50.909	35.2564
476	accB	WP_104405401.1	35616	73	40	1	83	155	86	151	3.11e-05	45.1	156	35.616	46.7949
477	accB	CDE40698.1	35443	79	44	1	78	156	551	622	3.79e-05	46.2	156	35.443	50.641
478	accB	WP_172345508.1	45283	53	29	0	103	155	98	150	4.15e-05	44.7	156	45.283	33.9744
479	accB	MBD9028005.1	40984	61	36	0	95	155	91	151	7.41e-05	44.3	156	40.984	39.1026
480	accB	MBD9036263.1	40984	61	36	0	95	155	91	151	7.41e-05	44.3	156	40.984	39.1026
481	accB	WP_073208944.1	38235	68	35	2	79	146	80	140	7.44e-05	44.3	156	38.235	43.5897
482	accB	CDE85855.1	35135	74	46	1	84	155	79	152	9.84e-05	43.9	156	35.135	47.4359
483	accB	CDE08442.1	39216	51	31	0	106	156	625	675	0.000133	44.7	156	39.216	32.6923
484	accB	CDE08442.1	39216	51	31	0	106	156	552	602	0.002	41.2	156	39.216	32.6923
485	accB	CCX44664.1	34483	87	49	2	70	156	65	143	0.000152	43.1	156	34.483	55.7692
486	accB	CDE58245.1	36471	85	45	2	72	156	68	143	0.000226	42.7	156	36.471	54.4872
487	accB	CCY15920.1	47727	44	23	0	103	146	101	144	0.000272	42.7	156	47.727	28.2051
488	accB	CDF22242.1	43396	53	30	0	103	155	99	151	0.000401	42	156	43.396	33.9744
489	accB	CCY64885.1	38889	54	33	0	103	156	111	164	0.000601	42	156	38.889	34.6154
490	accB	WP_172180624.1	33784	74	42	1	83	156	72	138	0.001	40.8	156	33.784	47.4359
491	accB	CCX43429.1	45000	40	22	0	117	156	2	41	0.004	37	156	45	25.641
492	accB	CCY80815.1	35185	54	35	0	103	156	111	164	0.014	38.1	156	35.185	34.6154
493	accB	WP_091964147.1	36486	74	28	2	79	146	81	141	0.042	36.6	156	36.486	47.4359
494	accB	WP_029903963.1	34118	85	35	3	68	146	71	140	0.072	35.8	156	34.118	54.4872
495	accB	MBD9027067.1	21014	138	96	3	3	134	237	367	0.26	35	156	21.014	88.4615
496	accB	CCY03365.1	29293	99	66	4	18	115	27	122	8.8	30.4	156	29.293	63.4615
497	accB	WP_004356833.1	28283	99	55	3	59	143	106	202	8.9	30	156	28.283	63.4615
498	acpS	WP_172178229.1	38889	54	33	0	19	72	105	158	0.025	37	126	38.889	42.8571
499	acpS	WP_092069308.1	30986	71	48	1	2	72	89	158	0.84	32.3	126	30.986	56.3492
500	acpS	CDC24097.1	27536	69	47	2	50	116	1	68	1.5	32	126	27.536	54.7619
501	acpS	MBD9073795.1	27536	69	47	2	50	116	1	68	1.6	31.6	126	27.536	54.7619
502	acpS	WP_091901255.1	33333	48	32	0	25	72	111	158	1.7	31.6	126	33.333	38.0952
503	acpS	WP_091915660.1	33333	48	32	0	25	72	111	158	2	31.2	126	33.333	38.0952
504	acpS	WP_172276003.1	27273	55	35	1	16	70	19	68	5.2	29.6	126	27.273	43.6508
505	acpS	WP_094379738.1	32692	52	35	0	21	72	108	159	6.1	30	126	32.692	41.2698
506	acpS	WP_107581534.1	30233	43	30	0	7	49	371	413	6.2	30.4	126	30.233	34.127
507	acpS	WP_025880944.1	30233	43	30	0	7	49	371	413	6.6	30	126	30.233	34.127
508	acpS	WP_021588685.1	30233	43	30	0	7	49	371	413	6.6	30	126	30.233	34.127
509	acpS	WP_004355614.1	24272	103	54	3	8	86	31	133	6.6	30	126	24.272	81.746
510	acpS	HCD76804.1	28571	56	39	1	70	124	97	152	8.9	29.6	126	28.571	44.4444
511	acpS	WP_091822906.1	41176	34	16	1	16	49	13	42	9.5	28.9	126	41.176	26.9841
512	asd	CDE08166.1	29330	358	211	12	3	356	2	321	7.4e-30	120	367	29.33	97.5477
513	asd	CCY03384.1	27401	354	220	8	4	356	3	320	4.03e-28	115	367	27.401	96.4578
514	asd	CDE86477.1	29494	356	211	9	3	356	2	319	1.29e-27	114	367	29.494	97.0027
515	asd	CDE41428.1	29282	362	203	10	4	356	3	320	7.92e-27	112	367	29.282	98.6376
516	asd	CDF22348.1	29006	362	205	10	3	356	2	319	2.29e-26	110	367	29.006	98.6376
517	asd	MBD9200629.1	25989	354	227	8	3	356	2	320	1.38e-25	108	367	25.989	96.4578
518	asd	HAM29291.1	25989	354	227	8	3	356	2	320	1.54e-25	108	367	25.989	96.4578
519	asd	HAE07646.1	25989	354	227	8	3	356	2	320	1.54e-25	108	367	25.989	96.4578
520	asd	WP_004356976.1	26966	356	221	9	3	356	2	320	2.22e-25	108	367	26.966	97.0027
521	asd	MBD9041301.1	25762	361	219	8	3	356	2	320	2.59e-25	108	367	25.762	98.3651
522	asd	WP_021668414.1	26685	356	222	9	3	356	2	320	3.21e-25	107	367	26.685	97.0027
523	asd	MBD9027603.1	28852	357	212	9	3	356	2	319	3.6e-25	107	367	28.852	97.2752
524	asd	WP_104404628.1	28809	361	207	8	3	356	2	319	3.98e-25	107	367	28.809	98.3651
525	asd	CCY16287.1	29396	364	201	11	3	356	2	319	7.26e-25	107	367	29.396	99.1826
526	asd	WP_070694107.1	28611	360	208	8	4	356	3	320	8.14e-25	106	367	28.611	98.0926
527	asd	WP_025002986.1	26870	361	213	8	4	356	3	320	1.51e-24	105	367	26.87	98.3651
528	asd	WP_019967920.1	27778	360	211	8	4	356	3	320	1.62e-24	105	367	27.778	98.0926
529	asd	WP_106810857.1	28531	354	217	8	3	356	2	319	3.12e-24	105	367	28.531	96.4578
530	asd	WP_036884747.1	26685	356	222	9	3	356	2	320	4.77e-24	104	367	26.685	97.0027
531	asd	WP_094879673.1	27401	354	221	7	3	356	2	319	4.89e-24	104	367	27.401	96.4578
532	asd	WP_008564655.1	27978	361	209	10	4	356	3	320	5.2e-24	104	367	27.978	98.3651
533	asd	WP_004378383.1	28255	361	210	8	3	356	2	320	6.06e-24	104	367	28.255	98.3651
534	asd	WP_006950680.1	27479	353	220	8	4	356	3	319	7.04e-24	104	367	27.479	96.1853
535	asd	CCX45069.1	31268	355	209	7	3	356	2	322	1.19e-23	103	367	31.268	96.7302
536	asd	CCX45069.1	31268	355	209	7	3	356	2	322	1.19e-23	103	367	31.268	96.7302
537	asd	CDA43599.1	27701	361	211	7	3	356	2	319	1.26e-23	103	367	27.701	98.3651
538	asd	WP_004371133.1	27978	361	211	8	3	356	2	320	1.5e-23	103	367	27.978	98.3651
539	asd	WP_028896909.1	26404	356	221	9	4	356	3	320	1.98e-23	102	367	26.404	97.0027
540	asd	WP_036910187.1	28732	355	216	9	3	356	2	320	2.28e-23	102	367	28.732	96.7302
541	asd	WP_018919906.1	29006	362	206	10	3	356	2	320	2.35e-23	102	367	29.006	98.6376
542	asd	WP_103003731.1	28090	356	215	9	4	356	3	320	2.49e-23	102	367	28.09	97.0027
543	asd	WP_008124459.1	28371	356	214	9	4	356	3	320	2.62e-23	102	367	28.371	97.0027
544	asd	RKW50230.1	27809	356	218	10	3	356	2	320	3.12e-23	102	367	27.809	97.0027
545	asd	CDA94922.1	24931	361	220	8	4	356	3	320	3.16e-23	102	367	24.931	98.3651
546	asd	WP_025071142.1	27528	356	219	10	3	356	2	320	3.69e-23	102	367	27.528	97.0027
547	asd	WP_070666252.1	27978	361	211	8	3	356	2	320	4.1e-23	102	367	27.978	98.3651
548	asd	WP_004380187.1	27809	356	218	10	3	356	2	320	4.63e-23	102	367	27.809	97.0027
549	asd	MBD9246312.1	27401	354	221	7	3	356	2	319	4.97e-23	101	367	27.401	96.4578
550	asd	CDB04278.1	27424	361	212	7	3	356	2	319	8.58e-23	101	367	27.424	98.3651
551	asd	WP_172344062.1	28895	353	215	7	4	356	3	319	8.79e-23	101	367	28.895	96.1853
552	asd	WP_091839620.1	28169	355	218	8	3	356	2	320	1e-22	100	367	28.169	96.7302
553	asd	WP_007135356.1	27424	361	213	8	3	356	2	320	1.5e-22	100	367	27.424	98.3651
554	asd	WP_006952906.1	27887	355	217	9	4	356	3	320	2.19e-22	100	367	27.887	96.7302
555	asd	CDE57315.1	28933	356	215	9	3	356	2	321	2.93e-22	99.8	367	28.933	97.0027
556	asd	WP_088438889.1	25691	362	218	8	3	356	2	320	3.18e-22	99.8	367	25.691	98.6376
557	asd	WP_027952372.1	25833	360	218	9	4	356	3	320	3.58e-22	99.4	367	25.833	98.0926
558	asd	WP_029905156.1	26648	364	209	9	4	356	3	319	3.81e-22	99.4	367	26.648	99.1826
559	asd	WP_015298522.1	25833	360	218	9	4	356	3	320	3.84e-22	99.4	367	25.833	98.0926
560	asd	WP_091916243.1	28732	355	216	9	3	356	2	320	4.03e-22	99.4	367	28.732	96.7302
561	asd	WP_004345432.1	25843	356	223	9	4	356	3	320	4.54e-22	99	367	25.843	97.0027
562	asd	EGQ15873.1	25833	360	218	9	4	356	17	334	4.63e-22	99.4	367	25.833	98.0926
563	asd	WP_172182809.1	27989	368	217	8	3	356	2	335	4.65e-22	99.4	367	27.989	100.272
564	asd	SEW13843.1	28732	355	216	9	3	356	39	357	4.85e-22	99.8	367	28.732	96.7302
565	asd	WP_073207464.1	27887	355	219	8	3	356	2	320	5.06e-22	99	367	27.887	96.7302
566	asd	MBB1530825.1	27222	360	213	8	4	356	3	320	5.48e-22	99	367	27.222	98.0926
567	asd	WP_024990336.1	26271	354	224	9	4	356	3	320	5.75e-22	99	367	26.271	96.4578
568	asd	WP_021670513.1	27119	354	221	8	4	356	3	320	6.87e-22	98.6	367	27.119	96.4578
569	asd	WP_025072459.1	27731	357	217	9	3	356	2	320	8.72e-22	98.2	367	27.731	97.2752
570	asd	WP_028902530.1	27887	355	219	8	3	356	2	320	1.07e-21	98.2	367	27.887	96.7302
571	asd	WP_028900196.1	27809	356	218	11	3	356	2	320	1.21e-21	97.8	367	27.809	97.0027
572	asd	HCJ45945.1	27887	355	217	9	4	356	3	320	1.27e-21	97.8	367	27.887	96.7302
573	asd	WP_013065686.1	27606	355	220	8	3	356	2	320	1.41e-21	97.8	367	27.606	96.7302
574	asd	WP_033151019.1	27887	355	219	8	3	356	2	320	1.44e-21	97.8	367	27.887	96.7302
575	asd	WP_021826188.1	27147	361	214	8	3	356	2	320	1.54e-21	97.8	367	27.147	98.3651
576	asd	WP_130830434.1	27966	354	220	9	3	356	2	320	1.7e-21	97.4	367	27.966	96.4578
577	asd	WP_091824947.1	25967	362	217	8	3	356	2	320	1.72e-21	97.4	367	25.967	98.6376
578	asd	WP_004340104.1	25843	356	223	9	4	356	3	320	1.86e-21	97.4	367	25.843	97.0027
579	asd	MBB1539650.1	27606	355	218	9	4	356	3	320	1.91e-21	97.4	367	27.606	96.7302
580	asd	WP_028911935.1	27606	355	220	8	3	356	2	320	1.95e-21	97.4	367	27.606	96.7302
581	asd	WP_022429449.1	26870	361	214	7	3	356	2	319	2.32e-21	97.1	367	26.87	98.3651
582	asd	WP_007899975.1	26870	361	214	7	3	356	2	319	2.34e-21	97.1	367	26.87	98.3651
583	asd	CCY65628.1	27424	361	212	8	3	356	2	319	2.37e-21	97.1	367	27.424	98.3651
584	asd	WP_048797982.1	26685	356	222	10	3	356	2	320	2.4e-21	97.1	367	26.685	97.0027
585	asd	WP_074550264.1	25691	362	218	8	3	356	2	320	2.52e-21	97.1	367	25.691	98.6376
586	asd	CCX66523.1	28249	354	218	6	3	356	2	319	2.69e-21	97.1	367	28.249	96.4578
587	asd	WP_091900995.1	28451	355	217	9	3	356	2	320	3.42e-21	96.7	367	28.451	96.7302
588	asd	WP_006283422.1	25691	362	218	8	3	356	2	320	3.66e-21	96.7	367	25.691	98.6376
589	asd	WP_025792407.1	26039	361	216	8	4	356	3	320	3.81e-21	96.7	367	26.039	98.3651
590	asd	WP_036880317.1	27731	357	214	9	4	356	3	319	3.99e-21	96.7	367	27.731	97.2752
591	asd	WP_068856077.1	28814	354	216	8	3	356	2	319	4.03e-21	96.7	367	28.814	96.4578
592	asd	WP_008823967.1	26039	361	216	8	4	356	3	320	4.33e-21	96.3	367	26.039	98.3651
593	asd	OKZ27257.1	28814	354	216	8	3	356	2	319	4.76e-21	96.3	367	28.814	96.4578
594	asd	SEE45012.1	28451	355	217	9	3	356	52	370	5.7e-21	96.7	367	28.451	96.7302
595	asd	WP_025881196.1	26870	361	215	8	3	356	2	320	6.45e-21	95.9	367	26.87	98.3651
596	asd	MBD8998314.1	27195	353	221	8	4	356	3	319	6.64e-21	95.9	367	27.195	96.1853
597	asd	CCZ15212.1	28814	354	216	8	3	356	2	319	7.33e-21	95.9	367	28.814	96.4578
598	asd	CCY83924.1	27119	354	222	7	3	356	2	319	7.62e-21	95.5	367	27.119	96.4578
599	asd	WP_004368769.1	28329	353	218	7	4	356	3	320	8.52e-21	95.5	367	28.329	96.1853
600	asd	WP_091963576.1	27119	354	221	8	4	356	3	320	9.39e-21	95.5	367	27.119	96.4578
601	asd	WP_044063624.1	26331	357	221	9	3	356	2	319	9.86e-21	95.5	367	26.331	97.2752
602	asd	MBA7488491.1	26404	356	223	8	3	356	2	320	1.02e-20	95.5	367	26.404	97.0027
603	asd	WP_007173615.1	26667	360	215	8	4	356	3	320	1.07e-20	95.1	367	26.667	98.0926
604	asd	WP_120174354.1	27684	354	219	8	4	356	3	320	1.08e-20	95.1	367	27.684	96.4578
605	asd	WP_094383584.1	26346	353	224	8	4	356	3	319	1.37e-20	95.1	367	26.346	96.1853
606	asd	WP_021589994.1	26870	361	215	8	3	356	2	320	1.65e-20	94.7	367	26.87	98.3651
607	asd	WP_023983859.1	27548	363	208	9	4	356	3	320	1.72e-20	94.7	367	27.548	98.9101
608	asd	WP_118866009.1	26243	362	216	8	3	356	2	320	1.86e-20	94.7	367	26.243	98.6376
609	asd	WP_061868007.1	26316	361	215	8	4	356	3	320	1.9e-20	94.7	367	26.316	98.3651
610	asd	WP_050695909.1	27684	354	219	8	4	356	3	320	2.18e-20	94.4	367	27.684	96.4578
611	asd	WP_094388716.1	26593	361	216	8	3	356	2	320	2.22e-20	94.4	367	26.593	98.3651
612	asd	WP_064972327.1	27887	355	217	9	4	356	3	320	2.36e-20	94.4	367	27.887	96.7302
613	asd	WP_100021587.1	26316	361	215	8	4	356	3	320	2.7e-20	94	367	26.316	98.3651
614	asd	WP_091815261.1	27119	354	221	8	4	356	3	320	2.76e-20	94	367	27.119	96.4578
615	asd	EKX97292.1	26331	357	221	9	3	356	96	413	3.1e-20	95.1	367	26.331	97.2752
616	asd	WP_036866996.1	26197	355	225	8	3	356	2	320	3.19e-20	94	367	26.197	96.7302
617	asd	WP_004349178.1	27401	354	222	8	3	356	2	320	3.38e-20	94	367	27.401	96.4578
618	asd	WP_097655824.1	26243	362	216	8	3	356	2	320	3.59e-20	94	367	26.243	98.6376
619	asd	WP_091852251.1	27042	355	222	8	3	356	2	320	3.73e-20	93.6	367	27.042	96.7302
620	asd	WP_065367712.1	27684	354	219	8	4	356	3	320	3.81e-20	93.6	367	27.684	96.4578
621	asd	WP_036861338.1	26197	355	225	8	3	356	2	320	4.15e-20	93.6	367	26.197	96.7302
622	asd	HBN46587.1	28011	357	214	9	4	356	3	320	4.21e-20	93.6	367	28.011	97.2752
623	asd	HBN46587.1	28011	357	214	9	4	356	3	320	4.21e-20	93.6	367	28.011	97.2752
624	asd	WP_027455474.1	27042	355	222	8	3	356	2	320	4.31e-20	93.6	367	27.042	96.7302
625	asd	WP_036856756.1	26479	355	224	8	3	356	2	320	4.45e-20	93.6	367	26.479	96.7302
626	asd	WP_022311663.1	26593	361	216	8	3	356	2	320	4.67e-20	93.6	367	26.593	98.3651
627	asd	WP_089367095.1	26836	354	222	8	4	356	3	320	4.95e-20	93.6	367	26.836	96.4578
628	asd	WP_023057294.1	26554	354	223	7	4	356	3	320	5.25e-20	93.2	367	26.554	96.4578
629	asd	WP_094384913.1	26593	361	216	8	3	356	2	320	5.25e-20	93.2	367	26.593	98.3651
630	asd	WP_126679177.1	27606	355	220	8	3	356	2	320	5.3e-20	93.2	367	27.606	96.7302
631	asd	WP_036879689.1	26479	355	224	7	3	356	2	320	5.85e-20	93.2	367	26.479	96.7302
632	asd	WP_025875203.1	26446	363	214	8	3	356	2	320	6.29e-20	93.2	367	26.446	98.9101
633	asd	WP_004352502.1	26479	355	224	8	3	356	2	320	6.38e-20	93.2	367	26.479	96.7302
634	asd	WP_027450217.1	27042	355	222	8	3	356	2	320	6.89e-20	93.2	367	27.042	96.7302
635	asd	WP_102697894.1	27401	354	222	8	3	356	2	320	6.9e-20	92.8	367	27.401	96.4578
636	asd	WP_004360695.1	26836	354	222	8	4	356	3	320	7.83e-20	92.8	367	26.836	96.4578
637	asd	WP_014710481.1	26316	361	215	8	4	356	3	320	9.15e-20	92.8	367	26.316	98.3651
638	asd	WP_092068584.1	26761	355	223	8	3	356	2	320	9.15e-20	92.8	367	26.761	96.7302
639	asd	RKW62113.1	26050	357	222	9	3	356	2	319	1.04e-19	92.4	367	26.05	97.2752
640	asd	BAR95410.1	26316	361	215	8	4	356	17	334	1.08e-19	92.8	367	26.316	98.3651
641	asd	HCN53228.1	26912	353	223	7	4	356	3	320	1.09e-19	92.4	367	26.912	96.1853
642	asd	WP_116616081.1	26944	360	214	8	4	356	3	320	1.17e-19	92.4	367	26.944	98.0926
643	asd	WP_155716432.1	26479	355	224	8	3	356	2	320	1.33e-19	92	367	26.479	96.7302
644	asd	WP_107620797.1	27731	357	217	9	3	356	2	320	1.38e-19	92	367	27.731	97.2752
645	asd	WP_013264068.1	26836	354	222	8	4	356	3	320	1.39e-19	92	367	26.836	96.4578
646	asd	WP_099984837.1	26316	361	215	8	4	356	3	320	1.58e-19	92	367	26.316	98.3651
647	asd	WP_036863918.1	26836	354	222	8	4	356	3	320	1.63e-19	92	367	26.836	96.4578
648	asd	WP_009228391.1	25706	354	227	6	3	356	2	319	1.98e-19	91.7	367	25.706	96.4578
649	asd	WP_107625408.1	26554	354	223	8	4	356	3	320	2.16e-19	91.7	367	26.554	96.4578
650	asd	WP_004338802.1	25915	355	226	8	3	356	2	320	2.2e-19	91.7	367	25.915	96.7302
651	asd	WP_007573530.1	25770	357	223	9	4	356	3	321	2.57e-19	91.3	367	25.77	97.2752
652	asd	WP_172205505.1	28329	353	217	7	4	356	3	319	2.59e-19	91.3	367	28.329	96.1853
653	asd	WP_036888097.1	25762	361	217	8	4	356	3	320	2.75e-19	91.3	367	25.762	98.3651
654	asd	WP_036888097.1	25762	361	217	8	4	356	3	320	2.75e-19	91.3	367	25.762	98.3651
655	asd	WP_009012677.1	26554	354	223	8	4	356	3	320	2.83e-19	91.3	367	26.554	96.4578
656	asd	WP_097646669.1	26316	361	215	8	4	356	3	320	3.03e-19	91.3	367	26.316	98.3651
657	asd	WP_004382331.1	25967	362	217	8	3	356	2	320	3.09e-19	91.3	367	25.967	98.6376
658	asd	WP_007368104.1	26479	355	224	8	3	356	2	320	3.13e-19	91.3	367	26.479	96.7302
659	asd	CDD04220.1	27147	361	214	8	3	356	2	320	3.37e-19	90.9	367	27.147	98.3651
660	asd	WP_025066235.1	26593	361	215	8	3	356	2	319	3.4e-19	90.9	367	26.593	98.3651
661	asd	WP_006044414.1	25691	362	218	8	3	356	2	320	3.47e-19	90.9	367	25.691	98.6376
662	asd	WP_025797624.1	26050	357	222	9	3	356	2	319	3.5e-19	90.9	367	26.05	97.2752
663	asd	WP_009230996.1	26796	362	213	8	3	356	2	319	3.88e-19	90.9	367	26.796	98.6376
664	asd	WP_018967971.1	27072	362	212	8	3	356	2	319	3.95e-19	90.9	367	27.072	98.6376
665	asd	WP_094381615.1	26346	353	224	8	4	356	3	319	4.04e-19	90.9	367	26.346	96.1853
666	asd	WP_115083580.1	25691	362	218	8	3	356	2	320	4.13e-19	90.9	367	25.691	98.6376
667	asd	WP_021853439.1	27119	354	222	7	3	356	2	319	4.25e-19	90.9	367	27.119	96.4578
668	asd	WP_099995875.1	25967	362	217	8	3	356	2	320	5.12e-19	90.5	367	25.967	98.6376
669	asd	WP_044065787.1	27147	361	214	8	3	356	2	320	5.42e-19	90.5	367	27.147	98.3651
670	asd	WP_100014558.1	26039	361	216	8	4	356	3	320	5.8e-19	90.5	367	26.039	98.3651
671	asd	WP_028910537.1	26891	357	219	9	4	356	3	321	5.92e-19	90.5	367	26.891	97.2752
672	asd	WP_044073589.1	27966	354	220	7	3	356	2	320	6.58e-19	90.1	367	27.966	96.4578
673	asd	WP_172176509.1	27684	354	220	7	3	356	2	319	6.9e-19	90.1	367	27.684	96.4578
674	asd	WP_044260517.1	26519	362	214	8	3	356	2	319	6.94e-19	90.1	367	26.519	98.6376
675	asd	WP_097550371.1	26039	361	216	8	4	356	3	320	7.32e-19	90.1	367	26.039	98.3651
676	asd	WP_092112993.1	26519	362	215	8	3	356	2	320	7.54e-19	90.1	367	26.519	98.6376
677	asd	WP_100371097.1	26039	361	216	8	4	356	3	320	7.61e-19	90.1	367	26.039	98.3651
678	asd	WP_018911306.1	25967	362	217	8	3	356	2	320	8.23e-19	90.1	367	25.967	98.6376
679	asd	WP_036892529.1	26667	360	215	8	4	356	3	320	9.15e-19	89.7	367	26.667	98.0926
680	asd	WP_025815408.1	26796	362	213	8	3	356	2	319	9.36e-19	89.7	367	26.796	98.6376
681	asd	WP_125234822.1	28169	355	218	8	3	356	2	320	9.83e-19	89.7	367	28.169	96.7302
682	asd	WP_070720395.1	26796	362	213	8	3	356	2	319	1.02e-18	89.7	367	26.796	98.6376
683	asd	WP_045166791.1	25762	361	217	8	4	356	3	320	1.11e-18	89.7	367	25.762	98.3651
684	asd	WP_025000045.1	26243	362	216	8	3	356	2	320	1.18e-18	89.4	367	26.243	98.6376
685	asd	WP_153114469.1	25989	354	225	8	4	356	3	320	1.21e-18	89.4	367	25.989	96.4578
686	asd	WP_042517376.1	27966	354	220	7	3	356	2	320	1.24e-18	89.4	367	27.966	96.4578
687	asd	WP_096407517.1	25967	362	217	8	3	356	2	320	1.24e-18	89.4	367	25.967	98.6376
688	asd	WP_036895734.1	25967	362	217	8	3	356	2	320	1.32e-18	89.4	367	25.967	98.6376
689	asd	WP_004365510.1	26039	361	218	8	3	356	2	320	1.43e-18	89.4	367	26.039	98.3651
690	asd	WP_104368825.1	28912	294	176	6	4	297	3	263	1.57e-18	88.2	367	28.912	80.109
691	asd	WP_118312022.1	25989	354	225	8	4	356	3	320	1.62e-18	89	367	25.989	96.4578
692	asd	WP_009237784.1	26796	362	213	8	3	356	2	319	1.62e-18	89	367	26.796	98.6376
693	asd	WP_018464878.1	25485	361	218	8	4	356	3	320	1.65e-18	89	367	25.485	98.3651
694	asd	WP_099836575.1	25967	362	217	8	3	356	2	320	1.7e-18	89	367	25.967	98.6376
695	asd	WP_077196771.1	26111	360	217	8	4	356	3	320	1.75e-18	89	367	26.111	98.0926
696	asd	WP_172277336.1	26912	353	222	7	4	356	3	319	1.76e-18	89	367	26.912	96.1853
697	asd	EID32368.1	26243	362	216	8	3	356	10	328	1.84e-18	89	367	26.243	98.6376
698	asd	WP_134843993.1	25989	354	225	8	4	356	3	320	2e-18	89	367	25.989	96.4578
699	asd	WP_100016000.1	25967	362	217	8	3	356	2	320	2.21e-18	88.6	367	25.967	98.6376
700	asd	WP_028904910.1	25967	362	217	8	3	356	2	320	2.23e-18	88.6	367	25.967	98.6376
701	asd	WP_006848280.1	25989	354	225	8	4	356	3	320	2.53e-18	88.6	367	25.989	96.4578
702	asd	WP_094400546.1	25691	362	218	8	3	356	2	320	2.53e-18	88.6	367	25.691	98.6376
703	asd	WP_117662130.1	25989	354	225	8	4	356	3	320	2.6e-18	88.6	367	25.989	96.4578
704	asd	WP_100023837.1	26316	361	217	8	3	356	2	320	2.84e-18	88.6	367	26.316	98.3651
705	asd	WP_022110772.1	25989	354	225	8	4	356	3	320	2.89e-18	88.2	367	25.989	96.4578
706	asd	MBD9259994.1	25706	354	226	8	4	356	3	320	3.09e-18	88.2	367	25.706	96.4578
707	asd	WP_094464610.1	27479	353	221	7	4	356	3	320	3.12e-18	88.2	367	27.479	96.1853
708	asd	WP_118201595.1	25989	354	225	8	4	356	3	320	3.18e-18	88.2	367	25.989	96.4578
709	asd	WP_117587456.1	25989	354	225	8	4	356	3	320	3.37e-18	88.2	367	25.989	96.4578
710	asd	WP_094391397.1	27479	353	221	7	4	356	3	320	3.51e-18	88.2	367	27.479	96.1853
711	asd	WP_099892132.1	26039	361	218	8	3	356	2	320	4.68e-18	87.8	367	26.039	98.3651
712	asd	WP_100019853.1	25691	362	218	8	3	356	2	320	4.87e-18	87.8	367	25.691	98.6376
713	asd	MBD9229188.1	26243	362	216	9	3	356	2	320	4.91e-18	87.8	367	26.243	98.6376
714	asd	WP_089544301.1	25989	354	225	8	4	356	3	320	4.91e-18	87.8	367	25.989	96.4578
715	asd	WP_158463511.1	25706	354	226	8	4	356	3	320	5.16e-18	87.8	367	25.706	96.4578
716	asd	MBD9073811.1	25706	354	226	8	4	356	3	320	5.46e-18	87.4	367	25.706	96.4578
717	asd	WP_004363983.1	25762	361	219	8	3	356	2	320	6.44e-18	87.4	367	25.762	98.3651
718	asd	WP_024992402.1	25485	361	219	7	3	356	2	319	6.49e-18	87.4	367	25.485	98.3651
719	asd	WP_119249850.1	25989	354	225	8	4	356	3	320	6.62e-18	87.4	367	25.989	96.4578
720	asd	WP_153113365.1	26271	354	224	7	4	356	3	320	6.82e-18	87.4	367	26.271	96.4578
721	asd	WP_144151842.1	25989	354	225	8	4	356	3	320	6.82e-18	87.4	367	25.989	96.4578
722	asd	WP_107582161.1	26667	360	215	8	4	356	3	320	8.43e-18	87	367	26.667	98.0926
723	asd	HAH90455.1	25706	354	226	8	4	356	3	320	1.1e-17	86.7	367	25.706	96.4578
724	asd	WP_018363287.1	25141	354	229	6	3	356	2	319	1.14e-17	86.7	367	25.141	96.4578
725	asd	WP_021583104.1	25485	361	219	7	3	356	2	319	1.75e-17	86.3	367	25.485	98.3651
726	asd	CCZ12093.1	25691	362	218	8	3	356	2	320	1.87e-17	85.9	367	25.691	98.6376
727	asd	WP_060932639.1	26593	361	216	9	3	356	2	320	2.75e-17	85.5	367	26.593	98.3651
728	asd	WP_008451067.1	26316	361	217	9	3	356	2	320	3.43e-17	85.1	367	26.316	98.3651
729	asd	WP_036855262.1	25556	360	219	7	4	356	3	320	7.44e-17	84.3	367	25.556	98.0926
730	asd	WP_019036280.1	26316	361	217	9	3	356	2	320	1.6e-16	83.2	367	26.316	98.3651
731	asd	WP_024998825.1	25138	362	220	8	3	356	2	320	5.72e-16	81.6	367	25.138	98.6376
732	asd	MBD9300159.1	27152	302	170	7	63	356	20	279	5.24e-15	78.6	367	27.152	82.2888
733	asd	WP_153129244.1	25538	325	206	7	33	356	6	295	8.24e-15	78.2	367	25.538	88.5559
734	asd	MBD8970987.1	26780	295	180	7	63	356	21	280	1.34e-14	77	367	26.78	80.3815
735	asd	WP_036899766.1	24931	361	222	9	3	356	2	320	2.04e-14	77	367	24.931	98.3651
736	asd	WP_062433813.1	24931	361	222	9	3	356	2	320	2.83e-14	76.6	367	24.931	98.3651
737	asd	MQO97491.1	26538	260	157	6	98	356	2	228	1.51e-11	67.4	367	26.538	70.8447
738	asd	HAG33500.1	28696	230	121	5	134	356	1	194	1.36e-10	64.3	367	28.696	62.6703
739	asd	HAG32421.1	28216	241	143	6	4	244	3	213	2.59e-10	63.5	367	28.216	65.6676
740	asd	MBB1551631.1	29050	179	121	3	4	182	3	175	5.69e-10	62	367	29.05	48.7738
741	asd	CDD18892.1	29577	142	81	3	222	356	1	130	5.64e-08	55.1	367	29.577	38.6921
742	asd	CUP13713.1	29630	135	90	3	222	356	1	130	3.25e-07	53.1	367	29.63	36.7847
743	asd	MBB1551236.1	28777	139	94	3	218	356	1	134	2.84e-06	50.4	367	28.777	37.8747
744	asd	HAT61432.1	26316	133	79	3	231	356	1	121	0.044	38.1	367	26.316	36.2398
745	asd	WP_025000212.1	27711	83	53	1	262	337	296	378	1.1	35.4	367	27.711	22.6158
746	asd	WP_021588451.1	40625	32	19	0	94	125	257	288	2.5	33.9	367	40.625	8.71935
747	asd	WP_107581503.1	40625	32	19	0	94	125	257	288	2.6	33.9	367	40.625	8.71935
748	asd	WP_027444677.1	40625	32	19	0	94	125	257	288	2.8	33.9	367	40.625	8.71935
749	asd	PIN29412.1	26923	78	50	1	267	337	288	365	4	33.5	367	26.923	21.2534
750	asd	WP_180946431.1	26923	78	50	1	267	337	301	378	4.6	33.5	367	26.923	21.2534
751	asd	WP_028909067.1	30120	83	48	3	1	79	1	77	5.6	32.7	367	30.12	22.6158
752	asd	RGX93958.1	30488	82	44	3	134	210	161	234	6.2	33.1	367	30.488	22.3433
753	asd	WP_118080380.1	30488	82	44	3	134	210	161	234	6.4	33.1	367	30.488	22.3433
754	asd	WP_153092265.1	30488	82	44	3	134	210	161	234	6.6	33.1	367	30.488	22.3433
755	asd	WP_118190771.1	30488	82	44	3	134	210	161	234	6.7	33.1	367	30.488	22.3433
756	asd	WP_006846677.1	30488	82	44	3	134	210	161	234	6.8	33.1	367	30.488	22.3433
757	asd	WP_107620491.1	32653	49	30	2	56	101	94	142	7.5	32.3	367	32.653	13.3515
758	asd	WP_080728506.1	25287	174	79	9	83	215	85	248	8	32.7	367	25.287	47.4114
759	asd	WP_084793477.1	25287	174	79	9	83	215	85	248	8.4	32.7	367	25.287	47.4114
[truncated: 39,997 more rows]
