# Supplementary material for: In Silico Prediction and Prioritisation of Novel Selective Antimicrobial Drug Targets in Escherichia Coli
Source: Research Square preprint supplement (doi:10.21203/rs.3.rs-131560/v1), 2021-01-04
Supplement: Supplementary file 3 [file c9d91dbbedebf3ef3d766cfd.xlsx]

## Sheet: Over cut-off
	% alignment	% id	bitscore	evalue	gapopen	length	mismatch	pident	prot length	qend	qseqid	qstart	send	sseqid	sstart
82	101.336	47.912	428	3.81e-143	6	455	228	47912	449	449	accC	2	501	AAK67986.1	49
83	101.336	47.692	426	8.54e-143	6	455	229	47692	449	449	accC	2	463	XP_011511294.1	11
84	101.336	47.692	427	1.59e-142	6	455	229	47692	449	449	accC	2	501	NP_064551.3	49
85	101.336	47.692	426	2.03e-142	6	455	229	47692	449	449	accC	2	501	AAG50245.1	49
86	101.336	47.473	424	3.9e-141	6	455	230	47473	449	449	accC	2	517	BAD92974.1	65
87	98.6637	48.984	416	8.49e-141	5	443	221	48984	449	440	accC	2	504	XP_016876105.1	63
88	92.8731	49.64	412	1.1e-140	5	417	204	49640	449	414	accC	2	425	EAW78339.1	11
89	98.6637	48.984	417	8.11e-140	5	443	221	48984	449	440	accC	2	504	NP_001339538.1	63
90	98.6637	48.984	417	9.97e-140	5	443	221	48984	449	440	accC	2	478	NP_001339536.1	37
91	98.6637	48.984	416	1.35e-139	5	443	221	48984	449	440	accC	2	504	XP_016876104.1	63
92	98.6637	48.984	418	1.86e-139	5	443	221	48984	449	440	accC	2	479	CAA32763.1	38
93	98.6637	48.984	418	2.03e-139	5	443	221	48984	449	440	accC	2	471	XP_016876098.1	30
94	98.6637	48.984	418	2.13e-139	5	443	221	48984	449	440	accC	2	478	NP_001121164.1	37
95	98.6637	48.984	417	2.19e-139	5	443	221	48984	449	440	accC	2	504	XP_016876102.1	63
96	98.6637	48.984	417	2.35e-139	5	443	221	48984	449	440	accC	2	504	BAG60571.1	63
97	98.6637	48.984	418	2.42e-139	5	443	221	48984	449	440	accC	2	479	BAG37887.1	38
98	98.6637	48.984	417	2.62e-139	5	443	221	48984	449	440	accC	2	504	NP_001171475.1	63
99	98.6637	48.984	418	3.15e-139	5	443	221	48984	449	440	accC	2	504	NP_001339534.1	63
100	98.6637	48.984	417	3.47e-139	5	443	221	48984	449	440	accC	2	504	XP_016876101.1	63
101	98.6637	48.984	417	3.88e-139	5	443	221	48984	449	440	accC	2	504	XP_016876100.1	63
102	98.6637	48.984	417	5.04e-139	5	443	221	48984	449	440	accC	2	471	XP_016876096.1	30
103	98.6637	48.984	417	6.41e-139	5	443	221	48984	449	440	accC	2	478	XP_016876095.1	37
104	98.6637	48.984	417	7.79e-139	5	443	221	48984	449	440	accC	2	504	NP_000273.2	63
105	98.6637	48.984	416	1.25e-138	5	443	221	48984	449	440	accC	2	504	XP_011519395.1	63
106	98.6637	48.984	417	1.91e-138	5	443	221	48984	449	440	accC	2	504	XP_016876094.1	63
107	98.6637	48.758	415	2.22e-138	5	443	222	48758	449	440	accC	2	478	BAG59350.1	37
108	90.4232	45.813	367	2.6e-122	5	406	214	45813	449	437	accC	36	439	BAG58277.1	36
109	93.9866	45.735	357	9.88e-118	7	422	219	45735	449	415	accC	2	456	BAG60062.1	37
110	100	44.098	371	6.49e-117	7	449	241	44098	449	442	accC	2	483	NP_071504.2	37
111	100	43.875	370	1.76e-116	7	449	242	43875	449	442	accC	2	483	AAA82937.1	37
112	100	44.098	370	2.02e-116	7	449	241	44098	449	442	accC	2	483	AAB31500.1	37
113	87.0824	46.292	352	9.15e-115	6	391	201	46292	449	449	accC	66	392	NP_001350809.1	4
114	98.6637	42.664	335	1e-107	6	443	201	42664	449	440	accC	2	430	NP_001339537.1	37
115	98.6637	42.664	335	1.52e-107	6	443	201	42664	449	440	accC	2	456	NP_001339535.1	63
116	81.5145	45.355	322	1.32e-105	6	366	191	45355	449	449	accC	91	366	BAG57977.1	3
117	65.9243	52.027	301	1.53e-96	2	296	140	52027	449	296	accC	2	357	EAX09032.1	63
118	74.3875	45.509	299	7.31e-95	6	334	173	45509	449	449	accC	123	351	CAH18403.1	20
119	74.3875	45.509	299	1.95e-94	6	334	173	45509	449	449	accC	123	384	NP_001280202.1	53
120	112.249	32.341	250	1.85e-76	12	504	274	32341	449	442	accC	1	538	2YL2_A	40
121	112.472	31.683	243	1.08e-73	12	505	275	31683	449	441	accC	1	537	3GID_A	39
122	112.472	31.683	243	2.63e-73	12	505	275	31683	449	441	accC	1	547	2HJW_A	49
123	112.472	31.683	243	2.67e-73	12	505	275	31683	449	441	accC	1	553	3JRW_A	55
124	112.472	31.683	243	2.83e-73	12	505	275	31683	449	441	accC	1	547	4HQ6_A	49
125	112.472	31.683	243	2.94e-73	12	505	275	31683	449	441	accC	1	553	3JRX_A	55
126	112.027	31.809	250	3.53e-72	10	503	278	31809	449	442	accC	1	676	6G2D_B	178
127	112.027	32.008	250	3.76e-72	11	503	277	32008	449	442	accC	1	652	XP_006721916.1	154
128	112.027	32.008	250	3.88e-72	11	503	277	32008	449	442	accC	1	660	XP_016880042.1	162
129	112.027	32.008	250	3.99e-72	11	503	277	32008	449	442	accC	1	652	NP_942131.1	154
130	112.027	32.008	250	4.3e-72	11	503	277	32008	449	442	accC	1	660	XP_016880043.1	162
131	112.027	31.809	250	4.35e-72	10	503	278	31809	449	442	accC	1	537	NP_942135.1	39
132	112.027	32.008	250	4.72e-72	11	503	277	32008	449	442	accC	1	622	XP_011523003.1	124
133	112.027	32.008	250	4.86e-72	11	503	277	32008	449	442	accC	1	615	NP_942133.1	117
134	112.027	31.809	250	4.88e-72	10	503	278	31809	449	442	accC	1	557	NP_942134.1	59
135	112.027	31.809	248	1.68e-71	11	503	278	31809	449	442	accC	1	615	AAP94122.1	117
136	112.472	31.683	244	2.34e-70	12	505	275	31683	449	441	accC	1	757	CAE01470.2	259
137	112.027	31.412	244	2.96e-70	10	503	280	31412	449	442	accC	1	615	S41121	117
138	112.472	31.683	244	4.23e-70	12	505	275	31683	449	441	accC	1	757	XP_011536567.1	259
139	112.472	31.683	243	9.12e-70	12	505	275	31683	449	441	accC	1	757	CAE01471.3	259
140	112.472	31.683	243	9.47e-70	12	505	275	31683	449	441	accC	1	757	NP_001084.3	259
141	112.472	31.683	243	9.66e-70	12	505	275	31683	449	441	accC	1	757	ABF48723.1	259
142	112.472	31.683	243	1.12e-69	12	505	275	31683	449	441	accC	1	555	XP_016874741.1	57
143	112.472	31.683	243	1.14e-69	12	505	275	31683	449	441	accC	1	757	XP_011536565.1	259
144	112.472	31.683	243	1.47e-69	12	505	275	31683	449	441	accC	1	555	XP_006719430.1	57
145	112.472	31.485	243	1.5e-69	11	505	276	31485	449	441	accC	1	757	AAR37018.1	259
146	112.472	31.683	243	1.67e-69	12	505	275	31683	449	441	accC	1	548	XP_011536566.1	50
147	112.027	31.213	234	1.72e-66	10	503	281	31213	449	442	accC	1	615	AAC50139.1	117
148	44.5434	52	211	2.84e-65	2	200	93	52000	449	264	accC	66	201	BAH14799.1	4
149	114.477	31.128	223	1.03e-62	18	514	267	31128	449	441	accC	1	757	AAB58382.1	258
150	107.127	30.769	221	2.22e-62	10	481	257	30769	449	441	accC	1	703	EAW97855.1	259
151	42.0935	43.915	159	1.74e-43	4	189	102	43915	449	440	accC	256	189	NP_001339540.1	1
152	42.0935	43.915	159	2.89e-43	4	189	102	43915	449	440	accC	256	189	NP_001339539.1	1
153	46.3252	27.404	89	9.31e-19	3	208	115	27404	449	172	accC	1	266	AAP94115.1	59
154	46.3252	27.404	88.2	1.15e-18	3	208	115	27404	449	172	accC	1	246	AAP94114.1	39
155	25.167	39.823	78.6	8.02e-16	3	113	65	39823	449	441	accC	332	137	AAA60035.1	25
156	21.6036	44.33	72.4	1.63e-14	1	97	53	44330	449	210	accC	114	102	2CQY_A	7
157	42.0935	29.101	77	2.43e-14	5	189	82	29101	449	440	accC	256	141	NP_001339541.1	1
158	51.8931	25.322	65.1	5.3e-10	6	233	153	25322	449	321	accC	97	715	BAA11423.1	496
210	63.4868	27.461	67.8	1.22e-11	3	193	127	27461	304	241	accD	50	239	AAB28900.1	59
211	62.1711	27.513	66.6	2.53e-11	3	189	124	27513	304	241	accD	54	239	XP_011511175.1	63
212	62.1711	27.513	67	2.57e-11	3	189	124	27513	304	241	accD	54	239	NP_000523.2	63
213	62.1711	27.513	67	2.66e-11	3	189	124	27513	304	241	accD	54	239	CAA51825.1	63
214	62.1711	27.513	65.9	3.12e-11	3	189	124	27513	304	241	accD	54	239	CAD89898.1	63
215	62.1711	27.513	66.2	4.44e-11	3	189	124	27513	304	241	accD	54	245	BAD92246.1	69
229	70.9524	30.649	177	5.95e-48	10	447	245	30649	630	624	aceF	206	468	AAA35589.1	59
232	70.9524	30.649	177	7.4e-48	10	447	245	30649	630	624	aceF	206	473	NP_001909.3	64
235	70.9524	30.201	172	3.37e-46	10	447	247	30201	630	624	aceF	206	468	AAA64512.1	59
238	51.1111	33.54	159	1.01e-41	6	322	186	33540	630	615	aceF	296	403	BAG61505.1	108
239	52.6984	33.434	159	5.56e-41	6	332	193	33434	630	615	aceF	286	527	NP_001358968.1	222
240	51.1111	33.54	158	5.59e-41	6	322	186	33540	630	615	aceF	296	478	NP_001358971.1	183
241	73.1746	29.501	159	1.87e-40	10	461	256	29501	630	615	aceF	184	576	NP_001358966.1	156
242	51.1111	33.54	157	4.51e-40	6	322	186	33540	630	615	aceF	296	590	NP_001358965.1	295
243	51.1111	33.54	155	1.04e-39	6	322	186	33540	630	615	aceF	296	505	NP_001358969.1	210
244	51.1111	33.54	155	1.55e-39	6	322	186	33540	630	615	aceF	296	539	NP_001358967.1	244
245	51.1111	33.54	156	1.85e-39	6	322	186	33540	630	615	aceF	296	621	NP_001358963.1	326
246	51.1111	33.54	156	1.93e-39	6	322	186	33540	630	615	aceF	296	632	BAD97316.1	337
247	51.1111	33.54	156	2.47e-39	6	322	186	33540	630	615	aceF	296	632	EAW67174.1	337
248	51.1111	33.54	156	2.47e-39	6	322	186	33540	630	615	aceF	296	632	NP_001922.2	337
249	73.1746	29.284	155	2.49e-39	10	461	257	29284	630	615	aceF	184	576	BAG58983.1	156
250	73.1746	29.284	153	1.48e-38	11	461	256	29284	630	615	aceF	184	598	AAA62253.1	179
251	51.5873	32.923	154	1.58e-38	6	325	190	32923	630	615	aceF	296	638	NP_001358960.1	337
252	51.1111	33.54	152	7.39e-38	6	322	179	33540	630	615	aceF	296	625	NP_001358962.1	337
253	95.2381	27.833	150	2.63e-37	15	600	334	27833	630	615	aceF	47	600	CAA68787.1	69
254	51.1111	32.919	147	2.32e-36	7	322	186	32919	630	615	aceF	296	630	NP_001358961.1	337
255	44.7619	34.043	142	1.25e-35	5	282	171	34043	630	615	aceF	336	413	BAG59614.1	145
256	49.5238	31.09	137	3.32e-35	6	312	168	31090	630	624	aceF	339	292	BAG64869.1	2
257	49.5238	30.769	135	1.9e-34	6	312	169	30769	630	624	aceF	339	292	XP_005270602.1	2
258	52.6984	31.627	137	1.87e-33	8	332	163	31627	630	615	aceF	286	491	NP_001358970.1	222
259	51.1111	31.677	134	7.11e-32	8	322	156	31677	630	615	aceF	296	596	NP_001358964.1	337
260	37.1429	33.761	124	5.33e-31	4	234	142	33761	630	615	aceF	384	224	3B8K_A	2
261	93.1746	27.768	130	1.05e-30	16	587	351	27768	630	615	aceF	47	600	1501257A	69
262	70.4762	26.802	127	1.79e-30	10	444	281	26802	630	628	aceF	217	440	XP_011518692.1	9
263	70.1587	27.149	127	2.95e-30	10	442	282	27149	630	628	aceF	217	485	NP_001128496.1	54
264	70.1587	27.376	127	5.15e-30	10	442	281	27376	630	628	aceF	217	500	BAG35370.1	69
265	70.3175	27.314	125	1.33e-29	11	443	280	27314	630	628	aceF	217	500	AAB66315.1	69
266	70.3175	27.314	125	1.42e-29	11	443	280	27314	630	628	aceF	217	500	CAA73606.1	69
267	32.5397	33.659	123	1.6e-29	1	205	135	33659	630	630	aceF	426	365	BAH13054.1	162
268	70.4762	27.027	125	2.22e-29	11	444	280	27027	630	628	aceF	217	500	NP_003468.2	69
269	70.1587	27.149	124	3.14e-29	10	442	282	27149	630	628	aceF	217	500	AAC39661.1	69
270	70.4762	27.027	124	3.67e-29	11	444	280	27027	630	628	aceF	217	500	AAH10389.1	69
271	32.5397	33.659	123	4.45e-29	1	205	135	33659	630	630	aceF	426	451	AAB59629.1	248
275	32.5397	33.659	123	5.36e-29	1	205	135	33659	630	630	aceF	426	451	NP_001924.2	248
279	32.5397	33.659	122	8.73e-29	1	205	135	33659	630	630	aceF	426	451	CAG33008.1	248
282	32.5397	33.659	122	1.18e-28	1	205	135	33659	630	630	aceF	426	451	BAA05536.1	248
286	32.5397	33.171	120	7.02e-28	1	205	136	33171	630	630	aceF	426	451	BAA03871.1	248
290	37.7778	31.933	116	4.03e-27	4	238	145	31933	630	628	aceF	398	374	AAB50223.1	147
291	36.0317	29.956	112	3.37e-25	2	227	157	29956	630	630	aceF	404	449	AAB31066.1	225
294	26.8254	36.095	96.3	5.79e-21	3	169	97	36095	630	628	aceF	467	273	NP_001159630.1	109
295	23.6508	34.899	96.3	1.04e-20	1	149	96	34899	630	574	aceF	426	307	CAD66571.1	160
296	38.4127	29.752	92.8	3e-20	5	242	144	29752	630	538	aceF	297	217	CAA32052.1	2
297	26.8254	35.503	92.8	7.11e-20	3	169	98	35503	630	628	aceF	467	273	BAG62924.1	109
298	17.619	42.342	87.8	5.91e-19	1	111	62	42342	630	577	aceF	467	157	EAW68159.1	49
299	46.1905	26.46	75.5	8.49e-14	9	291	150	26460	630	469	aceF	206	312	AAA59200.1	59
330	89.7436	44.286	64.7	1.41e-14	0	70	39	44286	78	73	acpP	4	77	5XTB_G	8
331	89.7436	44.286	64.7	2.09e-14	0	70	39	44286	78	73	acpP	4	85	2DNW_A	16
332	89.7436	44.286	65.5	3.92e-14	0	70	39	44286	78	73	acpP	4	148	NP_004994.1	79
333	89.7436	44.286	65.5	4.37e-14	0	70	39	44286	78	73	acpP	4	153	AAC05814.1	84
334	89.7436	44.286	65.1	8.46e-14	0	70	39	44286	78	73	acpP	4	179	XP_011544158.2	110
335	89.7436	42.857	62	6.87e-13	0	70	40	42857	78	73	acpP	4	148	AAH58920.1	79
336	66.6667	51.923	60.8	9.15e-13	0	52	25	51923	78	73	acpP	22	107	EAW55815.1	56
413	87.8505	53.723	209	1.72e-67	1	188	83	53723	214	184	adk	1	203	NP_037543.1	16
414	87.8505	53.723	209	1.84e-67	1	188	83	53723	214	184	adk	1	203	NP_001306070.1	16
415	87.8505	53.723	209	2.87e-67	1	188	83	53723	214	184	adk	1	204	2C9Y_A	17
416	87.8505	53.723	209	3.11e-67	1	188	83	53723	214	184	adk	1	203	NP_001616.1	16
417	87.8505	51.596	194	1.41e-61	2	188	79	51596	214	184	adk	1	195	NP_001186128.1	16
418	75.7009	54.321	182	3.98e-57	1	162	70	54321	214	158	adk	1	177	AAL87027.1	16
419	72.4299	54.194	173	7.41e-54	1	155	67	54194	214	184	adk	34	155	NP_001306068.1	1
420	72.4299	54.194	172	1.33e-53	1	155	67	54194	214	184	adk	34	155	NP_001306069.1	1
421	71.028	54.605	171	1.74e-53	1	152	65	54605	214	148	adk	1	167	EAX07485.1	16
422	88.3178	43.915	164	1.08e-49	3	189	96	43915	214	185	adk	1	190	NP_057366.2	8
423	88.3178	43.915	163	1.25e-49	3	189	96	43915	214	185	adk	1	190	AAP97224.1	8
424	88.3178	43.386	160	1.83e-48	3	189	97	43386	214	185	adk	1	190	BAA87913.1	8
425	85.9813	44.565	159	5.52e-48	3	184	92	44565	214	185	adk	6	178	AAP97143.1	1
426	85.9813	41.304	151	8.02e-45	3	184	102	41304	214	182	adk	1	185	AAH40224.1	6
427	85.9813	41.304	150	1.13e-44	3	184	102	41304	214	182	adk	1	185	NP_037542.1	6
428	85.9813	41.304	150	1.87e-44	3	184	102	41304	214	182	adk	1	207	2AR7_A	28
429	85.9813	41.304	150	2.01e-44	3	184	102	41304	214	182	adk	1	185	EAW88550.1	6
430	85.9813	40.761	149	5.33e-44	3	184	103	40761	214	182	adk	1	185	AAH66944.1	6
431	85.9813	40.761	148	1.57e-43	3	184	103	40761	214	182	adk	1	185	3NDP_A	6
432	59.3458	55.118	143	6.07e-43	1	127	53	55118	214	156	adk	34	127	AAL87028.1	1
433	87.8505	40.957	143	3.76e-42	2	188	65	40957	214	184	adk	1	161	NP_001306071.1	16
434	85.9813	38.043	131	2.14e-37	3	184	91	38043	214	182	adk	1	168	EAW88549.1	6
435	86.4486	36.216	122	3.42e-34	2	185	76	36216	214	185	adk	1	150	NP_001186781.1	8
436	86.4486	36.216	122	3.77e-34	2	185	76	36216	214	185	adk	1	150	BAG60470.1	8
437	44.8598	57.292	119	1.33e-33	0	96	41	57292	214	96	adk	1	111	BAG59564.1	16
438	43.9252	58.511	119	1.75e-33	0	94	39	58511	214	94	adk	1	109	NP_001306072.1	16
439	55.6075	47.899	116	4.38e-32	2	119	57	47899	214	185	adk	71	120	NP_001186782.1	3
440	55.6075	47.059	114	2.14e-31	2	119	58	47059	214	185	adk	71	120	BAG54101.1	3
441	85.514	34.973	110	4.31e-29	3	183	91	34973	214	184	adk	3	166	NP_000467.1	11
442	85.514	34.973	110	4.4e-29	3	183	91	34973	214	184	adk	3	166	AAH01116.1	11
443	85.514	34.973	109	5.21e-29	3	183	91	34973	214	184	adk	3	167	1Z83_A	12
444	85.514	34.973	109	8.42e-29	3	183	91	34973	214	184	adk	3	182	NP_001305051.1	27
445	85.514	34.973	108	9.41e-29	3	183	91	34973	214	184	adk	3	166	BAD97221.1	11
446	85.514	34.973	108	3.35e-28	3	183	91	34973	214	184	adk	3	221	EAW87706.1	66
447	83.6449	35.196	107	5.01e-28	3	179	88	35196	214	184	adk	7	159	XP_024303207.1	8
448	63.5514	41.912	105	1.05e-27	3	136	73	41912	214	182	adk	49	133	NP_001317545.1	2
449	42.5234	48.352	95.1	3.62e-24	0	91	47	48352	214	184	adk	94	94	EAX00475.1	4
450	102.336	31.963	95.5	1.92e-23	7	219	109	31963	214	213	adk	3	192	NP_001353064.1	6
451	102.336	31.963	95.1	4.17e-23	7	219	109	31963	214	213	adk	3	224	AAH14961.1	38
452	102.336	31.963	95.1	4.3e-23	7	219	109	31963	214	213	adk	3	224	NP_057392.1	38
453	87.8505	31.383	92.4	2.28e-22	4	188	97	31383	214	187	adk	3	172	AAD27956.1	14
454	85.0467	29.121	94	3.16e-22	3	182	124	29121	214	182	adk	2	243	NP_001304887.1	66
455	86.4486	29.189	95.1	4.92e-22	4	185	121	29189	214	184	adk	2	247	XP_011516579.1	71
457	85.0467	29.121	94	5.28e-22	3	182	124	29121	214	182	adk	2	275	NP_001304888.1	98
458	86.4486	29.189	94.4	1.32e-21	4	185	121	29189	214	184	adk	2	206	EAW88017.1	30
460	85.0467	29.121	94	1.54e-21	3	182	124	29121	214	182	adk	2	375	XP_006717028.1	198
461	67.2897	31.25	79.7	1.92e-16	3	144	92	31250	214	184	adk	43	163	XP_006717028.1	25
462	86.4486	29.189	94.4	1.56e-21	4	185	121	29189	214	184	adk	2	206	NP_001358700.1	30
463	85.0467	29.121	93.6	2.82e-21	3	182	124	29121	214	182	adk	2	418	NP_001358700.1	241
464	85.0467	29.121	94	1.61e-21	3	182	124	29121	214	182	adk	2	373	XP_011516580.1	196
465	67.2897	31.25	79.7	2.01e-16	3	144	92	31250	214	184	adk	43	161	XP_011516580.1	23
466	86.4486	29.189	94.4	1.63e-21	4	185	121	29189	214	184	adk	2	247	XP_005272226.1	71
467	85.0467	29.121	93.6	3.43e-21	3	182	124	29121	214	182	adk	2	459	XP_005272226.1	282
468	86.4486	29.189	94.4	1.69e-21	4	185	121	29189	214	184	adk	2	235	NP_689785.1	59
469	85.0467	29.121	93.6	3.29e-21	3	182	124	29121	214	182	adk	2	447	NP_689785.1	270
470	87.8505	30.851	90.1	1.99e-21	4	188	98	30851	214	187	adk	3	173	2BWJ_A	15
471	85.0467	29.121	93.6	2.32e-21	3	182	124	29121	214	182	adk	2	402	NP_001358701.1	225
472	67.2897	31.25	79.3	2.67e-16	3	144	92	31250	214	184	adk	43	190	NP_001358701.1	52
473	87.8505	31.383	92.4	2.83e-21	4	188	97	31383	214	187	adk	3	303	AAH12467.2	145
474	63.5514	37.5	87.8	4.71e-21	3	136	62	37500	214	182	adk	49	116	EAX06543.1	2
475	90.1869	31.088	93.2	5.8e-21	4	193	101	31088	214	192	adk	3	542	EAX06377.1	379
476	86.4486	27.568	80.9	9.45e-17	2	185	105	27568	214	185	adk	3	292	EAX06377.1	135
477	87.8505	31.383	92.8	7.17e-21	4	188	97	31383	214	187	adk	3	487	XP_016856499.1	329
478	86.4486	27.568	80.9	1.01e-16	2	185	105	27568	214	185	adk	3	242	XP_016856499.1	85
479	87.8505	31.383	92.8	7.84e-21	4	188	97	31383	214	187	adk	3	511	AAO16520.2	353
480	86.4486	27.568	80.9	9.54e-17	2	185	105	27568	214	185	adk	3	266	AAO16520.2	109
481	87.8505	31.383	92.4	8.3e-21	4	188	97	31383	214	187	adk	3	511	NP_036225.2	353
482	86.4486	27.568	80.9	1e-16	2	185	105	27568	214	185	adk	3	266	NP_036225.2	109
483	87.8505	31.383	92.8	8.48e-21	4	188	97	31383	214	187	adk	3	537	AAP97322.1	379
484	86.4486	27.568	80.9	9.56e-17	2	185	105	27568	214	185	adk	3	292	AAP97322.1	135
485	87.8505	31.383	92.4	8.55e-21	4	188	97	31383	214	187	adk	3	537	NP_777283.1	379
486	86.4486	27.568	80.9	9.74e-17	2	185	105	27568	214	185	adk	3	292	NP_777283.1	135
487	87.8505	31.383	92.4	8.8e-21	4	188	97	31383	214	187	adk	3	537	AAH36666.1	379
488	86.4486	27.568	80.9	1.04e-16	2	185	105	27568	214	185	adk	3	292	AAH36666.1	135
489	87.8505	31.383	92.4	9.18e-21	4	188	97	31383	214	187	adk	3	513	XP_005270796.1	355
490	86.4486	27.568	80.5	1.31e-16	2	185	105	27568	214	185	adk	3	268	XP_005270796.1	111
491	87.8505	30.851	89	1.41e-19	4	188	98	30851	214	187	adk	3	511	AAH33896.1	353
492	86.4486	27.568	80.9	1.05e-16	2	185	105	27568	214	185	adk	3	266	AAH33896.1	109
493	42.0561	44.444	82.4	5.29e-19	1	90	49	44444	214	171	adk	82	89	EAW98499.1	1
494	86.4486	27.568	80.9	6.52e-17	2	185	105	27568	214	185	adk	3	292	XP_016856501.1	135
495	86.4486	27.568	80.9	7.53e-17	2	185	105	27568	214	185	adk	3	292	EAX06378.1	135
497	33.6449	50	75.5	8.93e-17	0	72	36	50000	214	72	adk	1	87	EAX00477.1	16
498	56.0748	36.667	73.6	1.01e-15	3	120	68	36667	214	114	adk	3	125	EAX06870.1	6
499	33.6449	50	75.9	3.08e-15	0	72	36	50000	214	72	adk	1	87	EAX00476.1	16
500	56.0748	36.667	71.6	1.09e-14	3	120	68	36667	214	114	adk	3	157	BAG57577.1	38
501	42.9907	41.304	68.6	1.99e-13	2	92	49	41304	214	89	adk	3	129	BAG56775.1	38
502	43.4579	38.71	68.6	5.74e-13	1	93	55	38710	214	93	adk	3	203	BAC03558.1	111
503	70.5607	25.166	68.6	8.95e-13	3	151	104	25166	214	144	adk	3	255	EAW48335.1	105
504	64.9533	25.899	68.2	1.79e-12	2	139	95	25899	214	133	adk	3	171	BAB70945.1	33
505	64.9533	25.899	68.2	1.86e-12	2	139	95	25899	214	133	adk	3	171	NP_659462.1	33
506	64.9533	25.899	68.2	1.95e-12	2	139	95	25899	214	133	adk	3	243	NP_001316532.1	105
507	64.9533	25.899	68.6	1.99e-12	2	139	95	25899	214	133	adk	3	243	XP_016865875.1	105
510	64.9533	25.899	68.6	2.03e-12	2	139	95	25899	214	133	adk	3	243	XP_011533861.1	105
511	70.5607	25.166	68.6	2.08e-12	3	151	104	25166	214	144	adk	3	183	EAW48334.1	33
512	64.9533	25.899	68.6	2.33e-12	2	139	95	25899	214	133	adk	3	243	XP_011533857.1	105
515	64.9533	25.899	68.2	2.42e-12	2	139	95	25899	214	133	adk	3	243	XP_016865877.1	105
517	64.9533	25.899	68.2	2.53e-12	2	139	95	25899	214	133	adk	3	243	XP_011533858.1	105
519	41.1215	34.091	61.2	2.32e-11	0	88	58	34091	214	93	adk	6	88	XP_016882294.1	1
520	41.5888	33.708	61.6	3.99e-11	0	89	59	33708	214	93	adk	5	132	XP_016882293.1	44
521	69.6262	25.503	62.8	2.19e-10	3	149	102	25503	214	143	adk	4	254	XP_011533852.1	106
524	69.6262	25.503	62.4	2.23e-10	3	149	102	25503	214	143	adk	4	254	XP_006715439.2	106
527	69.6262	25.503	62.4	2.36e-10	3	149	102	25503	214	143	adk	4	182	XP_011533854.1	34
530	64.486	26.087	62.4	2.57e-10	2	138	94	26087	214	133	adk	4	243	XP_016865873.1	106
533	64.486	26.087	62.4	2.59e-10	2	138	94	26087	214	133	adk	4	243	XP_011533856.1	106
536	64.486	26.087	62.4	2.93e-10	2	138	94	26087	214	133	adk	4	171	NP_001138600.2	34
605	111.758	38.611	566	0	28	979	473	38611	876	875	alaS	4	963	NP_001596.2	6
606	111.758	38.611	566	0	28	979	473	38611	876	875	alaS	4	963	BAD96544.1	6
607	111.758	38.509	564	0	28	979	474	38509	876	875	alaS	4	963	BAA06808.1	6
608	113.699	37.851	562	0	26	996	481	37851	876	875	alaS	4	987	BAG61157.1	6
609	110.16	35.337	483	2.33e-155	30	965	498	35337	876	875	alaS	12	985	AAI31729.1	46
610	110.16	35.233	483	3.2e-155	30	965	499	35233	876	875	alaS	12	985	NP_065796.2	46
611	104.11	35.746	475	1.45e-152	29	912	461	35746	876	822	alaS	12	933	XP_011513066.1	46
612	53.1963	47.21	395	3.96e-128	13	466	198	47210	876	440	alaS	4	449	5KNN_A	3
613	53.1963	47.21	395	5.58e-128	13	466	198	47210	876	440	alaS	4	472	4XEM_A	26
614	53.1963	46.996	393	3.85e-127	13	466	199	46996	876	440	alaS	4	472	4XEO_A	26
615	90.6393	32.997	332	3.79e-100	22	794	431	32997	876	875	alaS	168	785	AAH33169.1	7
616	25.5708	47.768	218	3.05e-58	10	224	82	47768	876	220	alaS	12	249	XP_005249302.1	46
617	72.3744	29.338	179	2.19e-45	19	634	368	29338	876	875	alaS	317	888	XP_005249302.1	260
618	63.0137	28.986	147	3.18e-36	16	552	316	28986	876	875	alaS	395	555	XP_016866601.1	9
619	63.0137	28.986	147	3.32e-36	16	552	316	28986	876	875	alaS	395	551	AAH13593.1	5
620	4.90868	58.14	58.9	7.13e-10	0	43	18	58140	876	46	alaS	4	48	EAW51840.1	6
646	103.813	38.731	397	1.7e-130	11	599	333	38731	577	577	argS	1	607	4Q2T_A	21
647	103.813	38.731	396	2.12e-130	11	599	333	38731	577	577	argS	1	588	4ZAJ_A	2
648	103.813	38.731	396	1.34e-129	11	599	333	38731	577	577	argS	1	660	NP_002878.2	74
649	103.813	38.731	396	1.59e-129	11	599	333	38731	577	577	argS	1	660	EAW61507.1	74
650	103.813	38.731	396	2.06e-129	11	599	333	38731	577	577	argS	1	675	4R3Z_B	89
651	103.813	38.731	395	2.85e-129	11	599	333	38731	577	577	argS	1	660	BAD96517.1	74
652	103.813	38.564	394	7.33e-129	11	599	334	38564	577	577	argS	1	660	BAG37326.1	74
653	103.64	37.458	373	1.49e-120	11	598	341	37458	577	577	argS	1	659	AAB35627.1	74
654	80.2426	38.877	313	7.8e-100	7	463	261	38877	577	577	argS	128	454	BAG63528.1	1
655	93.0676	29.236	198	4.35e-55	14	537	339	29236	577	577	argS	59	578	NP_064716.2	65
656	93.0676	29.05	197	9.22e-55	14	537	340	29050	577	577	argS	59	578	BAB14608.1	65
657	93.0676	29.236	197	9.6e-55	14	537	339	29236	577	577	argS	59	578	AAH10420.1	65
658	92.721	28.972	195	9.12e-54	14	535	339	28972	577	575	argS	59	576	NP_001337434.1	65
659	73.4835	30.425	178	2.33e-48	11	424	262	30425	577	467	argS	59	470	XP_011534251.1	65
660	51.6464	31.879	133	3.29e-33	9	298	176	31879	577	341	argS	59	350	EAW48587.1	65
661	73.3102	26.714	124	1.15e-29	11	423	279	26714	577	577	argS	165	403	NP_001305714.1	2
662	72.9636	26.366	121	1.01e-28	11	421	279	26366	577	575	argS	165	401	NP_001337435.1	2
663	79.7227	25.217	114	3.21e-26	14	460	277	25217	577	577	argS	165	441	EAW48586.1	2
688	99.3562	42.117	374	6.64e-125	8	463	247	42117	466	464	asnS	6	475	AAH07800.2	30
689	99.3562	41.901	372	2.96e-124	8	463	248	41901	466	464	asnS	6	475	NP_078954.4	30
690	99.3562	42.117	372	2.99e-124	8	463	247	42117	466	464	asnS	6	475	BAG51837.1	30
691	99.3562	41.469	367	3.63e-122	8	463	242	41469	466	464	asnS	6	467	EAW75062.1	30
692	99.3562	40.821	358	7.45e-119	8	463	244	40821	466	464	asnS	6	466	XP_011543555.1	30
693	52.7897	46.748	235	8.08e-74	3	246	127	46748	466	464	asnS	222	248	NP_001230180.1	4
694	52.7897	46.748	234	1.15e-73	3	246	127	46748	466	464	asnS	222	248	BAB15655.1	4
695	52.7897	46.341	233	2.97e-73	3	246	128	46341	466	464	asnS	222	248	BAG37813.1	4
696	52.7897	44.715	221	1.65e-68	3	246	123	44715	466	464	asnS	222	239	XP_016873793.1	4
697	61.3734	37.762	201	6.12e-60	6	286	160	37762	466	287	asnS	4	297	XP_016873791.1	28
698	97.6395	28.132	181	1.93e-50	12	455	271	28132	466	459	asnS	20	465	5XIX_A	52
699	97.6395	28.352	182	1.96e-50	12	455	270	28352	466	459	asnS	20	541	BAD96555.1	128
700	97.6395	28.132	181	4.95e-50	12	455	271	28132	466	459	asnS	20	540	XP_005266757.1	127
701	97.6395	28.132	181	5.75e-50	12	455	271	28132	466	459	asnS	20	541	NP_004530.1	128
702	68.4549	30.721	158	8.93e-44	8	319	173	30721	466	459	asnS	152	292	BAG60122.1	11
703	75.1073	29.429	128	1.03e-31	11	350	190	29429	466	462	asnS	130	397	NP_001280241.1	88
704	75.1073	29.429	128	2.01e-31	11	350	190	29429	466	462	asnS	130	464	EAX11618.1	155
705	75.1073	29.429	129	2.18e-31	11	350	190	29429	466	462	asnS	130	497	AAI07750.1	188
706	74.8927	29.226	125	2.19e-31	11	349	190	29226	466	462	asnS	131	309	AAY15029.1	1
707	75.1073	29.429	129	2.25e-31	11	350	190	29429	466	462	asnS	130	497	AAX07827.1	188
708	75.1073	29.429	129	2.25e-31	11	350	190	29429	466	462	asnS	130	497	BAD96196.1	188
709	75.1073	29.429	129	2.27e-31	11	350	190	29429	466	462	asnS	130	497	NP_001340.2	188
710	75.1073	29.429	129	2.88e-31	11	350	190	29429	466	462	asnS	130	517	4J15_A	208
711	75.1073	29.429	126	1.28e-30	11	350	190	29429	466	462	asnS	130	496	AAA35567.1	187
712	113.734	23.396	69.7	1.46e-11	23	530	284	23396	466	462	asnS	19	558	NP_001352141.1	65
749	102.034	40.199	436	2.51e-145	11	602	336	40199	590	589	aspS	1	600	4AH6_A	10
750	102.034	40.199	436	3.02e-145	11	602	336	40199	590	589	aspS	1	639	NP_060592.2	49
751	102.034	40.199	436	3.16e-145	11	602	336	40199	590	589	aspS	1	639	BAF83562.1	49
752	102.034	38.87	404	1.79e-133	12	602	295	38870	590	590	aspS	1	589	NP_001352141.1	49
753	102.203	37.313	380	5.86e-124	11	603	317	37313	590	590	aspS	1	603	EAW90960.1	49
754	78.8136	39.355	339	6.31e-110	7	465	265	39355	590	589	aspS	134	457	BAB14228.1	1
755	78.8136	39.14	336	1.35e-108	7	465	266	39140	590	589	aspS	134	457	BAA91658.1	1
756	73.0508	40.139	297	1.97e-93	9	431	243	40139	590	424	aspS	1	471	NP_001352142.1	49
757	35.5932	29.524	92.4	1.78e-20	3	210	101	29524	590	589	aspS	387	184	BAB14197.1	15
758	41.1864	27.572	84.3	3.74e-16	9	243	159	27572	590	261	aspS	26	299	4DPG_A	67
760	41.1864	27.572	84.3	4.35e-16	9	243	159	27572	590	261	aspS	26	299	3BJU_A	67
762	41.1864	27.572	84	6.5e-16	9	243	159	27572	590	261	aspS	26	367	BAA06688.2	135
764	41.1864	27.572	84	6.67e-16	9	243	159	27572	590	261	aspS	26	367	NP_005539.1	135
766	41.1864	27.572	84	8.17e-16	9	243	159	27572	590	261	aspS	26	395	AAG30114.1	163
768	41.1864	27.572	83.6	9.82e-16	9	243	159	27572	590	261	aspS	26	395	NP_001123561.1	163
770	41.1864	27.572	83.6	1.04e-15	9	243	159	27572	590	261	aspS	26	404	EAW95621.1	172
772	41.1864	27.572	83.2	1.16e-15	9	243	159	27572	590	261	aspS	26	299	6ILH_A	67
774	41.1864	27.16	82.4	1.85e-15	9	243	160	27160	590	261	aspS	26	299	4YCW_A	67
776	29.8305	28.409	79.7	8.91e-15	5	176	120	28409	590	261	aspS	90	211	XP_016878706.1	38
778	23.3898	32.609	76.3	1.04e-13	4	138	88	32609	590	252	aspS	118	228	BAC86604.1	93
780	44.5763	25.856	75.9	1.89e-13	8	263	166	25856	590	262	aspS	23	284	EAX11618.1	28
781	14.5763	37.209	64.7	5.98e-10	1	86	50	37209	590	556	aspS	471	461	EAX11618.1	380
782	44.5763	25.856	75.9	1.97e-13	8	263	166	25856	590	262	aspS	23	337	4J15_A	81
783	14.5763	37.209	65.1	5.92e-10	1	86	50	37209	590	556	aspS	471	514	4J15_A	433
784	44.5763	25.856	75.9	2.14e-13	8	263	166	25856	590	262	aspS	23	316	AAA35567.1	60
786	44.5763	25.856	75.9	2.19e-13	8	263	166	25856	590	262	aspS	23	317	BAD96196.1	61
787	14.5763	37.209	65.1	5e-10	1	86	50	37209	590	556	aspS	471	494	BAD96196.1	413
788	44.5763	25.856	75.9	2.22e-13	8	263	166	25856	590	262	aspS	23	317	NP_001340.2	61
789	14.5763	37.209	65.1	4.79e-10	1	86	50	37209	590	556	aspS	471	494	NP_001340.2	413
790	44.5763	25.856	75.9	2.3e-13	8	263	166	25856	590	262	aspS	23	317	AAX07827.1	61
791	14.5763	37.209	65.1	5e-10	1	86	50	37209	590	556	aspS	471	494	AAX07827.1	413
792	44.5763	25.856	75.9	2.3e-13	8	263	166	25856	590	262	aspS	23	317	AAI07750.1	61
793	14.5763	37.209	65.1	4.79e-10	1	86	50	37209	590	556	aspS	471	494	AAI07750.1	413
794	37.6271	26.126	72	2.2e-12	6	222	142	26126	590	262	aspS	57	217	NP_001280241.1	2
795	14.5763	37.209	64.3	7.08e-10	1	86	50	37209	590	556	aspS	471	394	NP_001280241.1	313
796	14.5763	37.209	63.9	5.73e-10	1	86	50	37209	590	556	aspS	471	306	AAY15029.1	225
798	43.2203	25.882	63.9	6.07e-10	11	255	159	25882	590	253	aspS	15	281	XP_016873791.1	41
799	42.8814	24.506	64.7	7.22e-10	9	253	165	24506	590	253	aspS	15	281	NP_078954.4	41
801	42.8814	24.506	64.3	7.78e-10	9	253	165	24506	590	253	aspS	15	281	XP_011543555.1	41
803	42.8814	24.506	64.3	9.39e-10	9	253	165	24506	590	253	aspS	15	281	AAH07800.2	41
830	59.6296	21.739	65.5	5.55e-10	17	483	290	21739	810	807	bamA	349	465	BAA91498.1	47
831	59.6296	21.325	65.1	7.79e-10	16	483	292	21325	810	807	bamA	349	465	AAH11681.1	47
863	43.1579	39.837	81.6	1.69e-17	3	123	67	39837	285	265	cdsA	145	154	BAG64477.1	37
864	59.6491	30.588	66.6	1.69e-11	4	170	68	30588	285	265	cdsA	145	306	XP_011527692.1	138
865	59.6491	30.588	67	1.82e-11	4	170	68	30588	285	265	cdsA	145	384	BAG50907.1	216
866	59.6491	30.588	66.2	2.01e-11	4	170	68	30588	285	265	cdsA	145	264	BAG65518.1	96
867	59.6491	30.588	65.9	4.1e-11	4	170	68	30588	285	265	cdsA	145	360	AAC78305.1	192
868	59.6491	30.588	65.5	4.93e-11	4	170	68	30588	285	265	cdsA	145	384	NP_003809.1	216
869	59.6491	30.588	65.5	5.11e-11	4	170	68	30588	285	265	cdsA	145	384	BAG51366.1	216
870	47.3684	33.333	65.1	6.51e-11	4	135	70	33333	285	265	cdsA	145	361	XP_005262744.1	233
871	61.0526	28.736	64.3	1.54e-10	3	174	66	28736	285	265	cdsA	145	401	AAC50735.1	233
872	61.0526	28.736	63.9	1.85e-10	3	174	66	28736	285	265	cdsA	145	401	NP_001254.2	233
899	93.6893	36.269	121	3.9e-33	2	193	119	36269	206	191	coaE	3	194	BAF83444.1	2
900	93.6893	36.269	121	4.03e-33	2	193	119	36269	206	191	coaE	3	194	NP_079095.3	2
901	93.6893	35.751	117	1.16e-31	2	193	120	35751	206	191	coaE	3	194	AAH06472.1	2
902	51.9417	42.056	92.4	3.94e-23	1	107	58	42056	206	109	coaE	3	104	XP_005257745.1	2
903	79.1262	28.221	76.6	3.63e-16	3	163	112	28221	206	161	coaE	3	181	AAH06354.1	20
904	79.1262	28.221	76.6	7e-16	3	163	112	28221	206	161	coaE	3	225	AAF87955.1	64
905	87.3786	26.667	77	7.34e-16	3	180	127	26667	206	178	coaE	3	206	G01606	28
906	86.8932	25.698	75.9	4.88e-15	3	179	96	25698	206	161	coaE	3	520	BAG36775.1	359
907	86.8932	25.698	75.9	4.95e-15	3	179	96	25698	206	161	coaE	3	549	NP_001035997.2	388
908	86.8932	25.698	75.5	4.97e-15	3	179	96	25698	206	161	coaE	3	520	NP_001035994.1	359
909	86.8932	25.698	75.5	4.97e-15	3	179	96	25698	206	161	coaE	3	520	AAL50813.1	359
910	86.8932	25.698	75.5	5.05e-15	3	179	96	25698	206	161	coaE	3	549	EAW60840.1	388
928	88.6562	28.15	191	1.17e-52	10	508	345	28150	573	566	cydC	70	569	4A82_A	71
929	62.8272	30.833	172	2.2e-44	8	360	228	30833	573	568	cydC	220	626	AAH42531.1	277
930	42.4084	33.745	139	2.06e-33	5	243	147	33745	573	567	cydC	338	1274	AAH42531.1	1033
931	62.8272	30.556	171	4.87e-44	8	360	229	30556	573	568	cydC	220	626	EAW76944.1	277
932	21.1169	33.058	67.8	1.06e-10	3	121	70	33058	573	447	cydC	338	1153	EAW76944.1	1033
933	62.8272	30.556	171	8.27e-44	8	360	229	30556	573	568	cydC	220	626	NP_061337.1	277
934	42.4084	33.745	139	2.11e-33	5	243	147	33745	573	567	cydC	338	1274	NP_061337.1	1033
935	62.8272	30.556	170	9.62e-44	8	360	229	30556	573	568	cydC	220	640	EAW76949.1	291
936	41.1867	34.746	146	1.17e-35	4	236	147	34746	573	567	cydC	338	1281	EAW76949.1	1047
937	62.8272	30.556	170	9.89e-44	8	360	229	30556	573	568	cydC	220	626	XP_016867812.1	277
938	42.4084	33.745	139	2.36e-33	5	243	147	33745	573	567	cydC	338	1274	XP_016867812.1	1033
939	62.8272	30.556	170	1.01e-43	8	360	229	30556	573	568	cydC	220	626	NP_000434.1	277
940	41.1867	34.746	146	1.2e-35	4	236	147	34746	573	567	cydC	338	1267	NP_000434.1	1033
941	62.8272	30.556	170	1.1e-43	8	360	229	30556	573	568	cydC	220	716	XP_011514610.3	367
942	42.4084	33.745	138	3.42e-33	5	243	147	33745	573	567	cydC	338	1364	XP_011514610.3	1123
943	62.8272	30.556	170	1.12e-43	8	360	229	30556	573	568	cydC	220	716	XP_011514611.3	367
944	41.1867	34.746	145	1.96e-35	4	236	147	34746	573	567	cydC	338	1357	XP_011514611.3	1123
945	62.8272	30.556	170	1.25e-43	8	360	229	30556	573	568	cydC	220	406	XP_011514617.2	57
946	42.4084	33.745	139	2.62e-33	5	243	147	33745	573	567	cydC	338	1054	XP_011514617.2	813
947	62.8272	30.556	170	1.32e-43	8	360	229	30556	573	568	cydC	220	716	XP_011514612.3	367
948	42.4084	33.745	138	3.83e-33	5	243	147	33745	573	567	cydC	338	1329	XP_011514612.3	1088
949	62.8272	30.556	170	1.45e-43	8	360	229	30556	573	568	cydC	220	716	XP_011514615.2	367
950	41.1867	34.746	145	1.94e-35	4	236	147	34746	573	567	cydC	338	1310	XP_011514615.2	1076
951	62.8272	30.556	169	1.48e-43	8	360	229	30556	573	568	cydC	220	626	NP_061338.1	277
952	41.1867	34.746	145	1.58e-35	4	236	147	34746	573	567	cydC	338	1220	NP_061338.1	986
953	62.8272	30.556	169	1.71e-43	8	360	229	30556	573	568	cydC	220	716	XP_011514614.3	367
954	42.4084	33.745	138	4.33e-33	5	243	147	33745	573	567	cydC	338	1317	XP_011514614.3	1076
955	62.8272	30.556	169	1.74e-43	8	360	229	30556	573	568	cydC	220	716	XP_011514613.3	367
956	42.4084	33.745	138	4.5e-33	5	243	147	33745	573	567	cydC	338	1321	XP_011514613.3	1080
957	83.9442	27.027	167	1.01e-42	14	481	297	27027	573	568	cydC	117	624	AAA59575.1	169
958	41.0122	34.468	147	2.99e-36	3	235	149	34468	573	567	cydC	338	1268	AAA59575.1	1034
959	54.6248	31.949	167	1.29e-42	7	313	185	31949	573	567	cydC	273	617	AAP55848.1	315
960	45.3752	35.769	154	3.48e-38	5	260	158	35769	573	568	cydC	317	1249	AAP55848.1	991
961	54.6248	31.949	167	1.34e-42	7	313	185	31949	573	567	cydC	273	617	NP_001157413.1	315
962	45.3752	35.769	154	3.42e-38	5	260	158	35769	573	568	cydC	317	1249	NP_001157413.1	991
963	44.8517	37.743	164	3.21e-42	3	257	150	37743	573	567	cydC	313	702	BAG50910.1	454
964	46.2478	36.226	164	3.66e-42	3	265	154	36226	573	567	cydC	317	675	BAG57829.1	412
965	46.2478	36.226	163	6.64e-42	3	265	154	36226	573	567	cydC	317	675	NP_001258627.1	412
966	46.2478	36.226	163	7.21e-42	3	265	154	36226	573	567	cydC	317	661	NP_001258626.1	398
967	46.2478	36.226	163	7.33e-42	3	265	154	36226	573	567	cydC	317	662	NP_001258628.1	399
968	83.9442	27.027	164	8.24e-42	14	481	297	27027	573	568	cydC	117	623	6QEE_A	168
969	51.4834	31.864	149	7.88e-37	6	295	191	31864	573	567	cydC	282	1267	6QEE_A	974
970	46.2478	36.226	163	8.84e-42	3	265	154	36226	573	567	cydC	317	697	AAD47141.1	434
971	46.2478	36.226	163	1e-41	3	265	154	36226	573	567	cydC	317	701	BAA28861.1	438
972	83.9442	26.819	164	1.03e-41	14	481	298	26819	573	568	cydC	117	624	BAF82848.1	169
973	41.0122	34.468	147	3.46e-36	3	235	149	34468	573	567	cydC	338	1268	BAF82848.1	1034
974	83.9442	26.819	164	1.1e-41	14	481	298	26819	573	568	cydC	117	624	NP_000918.2	169
975	41.0122	34.468	147	3.62e-36	3	235	149	34468	573	567	cydC	338	1268	NP_000918.2	1034
976	83.9442	26.819	164	1.14e-41	14	481	298	26819	573	568	cydC	117	624	6QEX_A	169
977	41.0122	34.468	147	3.49e-36	3	235	149	34468	573	567	cydC	338	1268	6QEX_A	1034
978	46.2478	36.226	163	1.17e-41	3	265	154	36226	573	567	cydC	317	702	NP_004290.2	439
979	46.2478	36.226	163	1.19e-41	3	265	154	36226	573	567	cydC	317	701	NP_001258625.1	438
980	83.9442	26.819	164	1.63e-41	14	481	298	26819	573	568	cydC	117	624	AAI30425.1	169
981	41.0122	34.468	147	3.59e-36	3	235	149	34468	573	567	cydC	338	1268	AAI30425.1	1034
982	83.9442	26.819	164	1.71e-41	14	481	298	26819	573	568	cydC	117	694	NP_001335874.1	239
983	41.0122	34.468	147	4.99e-36	3	235	149	34468	573	567	cydC	338	1338	NP_001335874.1	1104
984	46.2478	36.226	162	1.84e-41	3	265	154	36226	573	567	cydC	317	701	AAC39865.1	438
985	83.9442	26.611	163	3.03e-41	14	481	299	26611	573	568	cydC	117	624	6C0V_A	169
986	41.0122	34.043	146	9.73e-36	3	235	150	34043	573	567	cydC	338	1268	6C0V_A	1034
987	63.5253	28.571	162	4.27e-41	9	364	231	28571	573	568	cydC	220	560	ACF94688.1	211
988	41.0122	34.468	147	4e-36	3	235	149	34468	573	567	cydC	338	1204	ACF94688.1	970
989	92.1466	26.705	159	4.59e-41	14	528	340	26705	573	571	cydC	62	521	XP_005253615.1	23
990	63.5253	28.571	162	6.38e-41	9	364	231	28571	573	568	cydC	220	406	BAD92207.1	57
991	41.0122	34.468	147	4.72e-36	3	235	149	34468	573	567	cydC	338	1050	BAD92207.1	816
992	83.9442	27.027	161	1.08e-40	14	481	297	27027	573	568	cydC	117	623	6FN4_A	168
993	51.4834	31.864	145	1.49e-35	6	295	191	31864	573	567	cydC	282	1267	6FN4_A	974
994	83.9442	27.027	161	1.08e-40	14	481	297	27027	573	568	cydC	117	593	6FN1_A	138
995	51.4834	31.864	145	1.39e-35	6	295	191	31864	573	567	cydC	282	1237	6FN1_A	944
996	83.9442	27.027	161	1.33e-40	14	481	296	27027	573	568	cydC	117	623	AAB69423.1	169
997	41.0122	34.468	147	3.49e-36	3	235	149	34468	573	567	cydC	338	1267	AAB69423.1	1033
998	91.9721	26.755	157	1.51e-40	14	527	339	26755	573	571	cydC	63	518	EAW98353.1	21
999	46.7714	33.209	155	2.22e-40	4	268	168	33209	573	568	cydC	310	442	AAY24100.1	177
1000	91.9721	26.755	158	5.82e-40	14	527	339	26755	573	571	cydC	63	739	NP_062571.1	242
1001	92.4956	26.792	156	2.13e-39	15	530	338	26792	573	571	cydC	63	742	AAH64384.1	242
1002	46.7714	35.075	154	8.32e-39	5	268	165	35075	573	568	cydC	309	673	AAN76500.1	407
1004	46.7714	35.075	154	9.04e-39	5	268	165	35075	573	568	cydC	309	674	EAW93728.1	408
1006	87.26	27.8	154	1.64e-38	13	500	321	27800	573	568	cydC	93	1326	XP_006712880.1	843
1007	86.911	26.506	141	3.57e-34	11	498	337	26506	573	567	cydC	87	665	XP_006712880.1	180
1008	87.26	27.8	154	1.64e-38	13	500	321	27800	573	568	cydC	93	1312	AAD28285.1	829
1009	86.911	26.506	142	2.45e-34	11	498	337	26506	573	567	cydC	87	651	AAD28285.1	166
1010	87.26	27.8	154	1.66e-38	13	500	321	27800	573	568	cydC	93	1312	AAC77455.1	829
1011	86.911	26.305	140	7.76e-34	11	498	338	26305	573	567	cydC	87	651	AAC77455.1	166
1012	87.26	27.8	154	1.72e-38	13	500	321	27800	573	568	cydC	93	1312	NP_003733.2	829
1013	86.911	26.506	141	3.72e-34	11	498	337	26506	573	567	cydC	87	651	NP_003733.2	166
1014	87.26	27.8	154	1.82e-38	13	500	321	27800	573	568	cydC	93	1321	EAX11287.1	838
1015	86.911	26.506	141	4.77e-34	11	498	337	26506	573	567	cydC	87	651	EAX11287.1	166
1016	87.26	27.8	154	1.98e-38	13	500	321	27800	573	568	cydC	93	1089	XP_016860655.1	606
1017	76.7888	27.955	133	1.79e-31	11	440	271	27955	573	567	cydC	138	428	XP_016860655.1	25
1018	41.0122	34.468	147	2.14e-38	3	235	149	34468	573	567	cydC	338	350	EAW76940.1	116
1019	46.7714	33.209	153	2.15e-38	4	268	168	33209	573	568	cydC	310	754	XP_011510383.1	489
1020	16.2304	39.785	77.4	8.83e-14	0	93	56	39785	573	567	cydC	475	93	XP_011510383.1	1
1021	87.26	27.8	154	2.21e-38	13	500	321	27800	573	568	cydC	93	1346	XP_011510379.1	863
1022	86.911	26.506	141	4.44e-34	11	498	337	26506	573	567	cydC	87	685	XP_011510379.1	200
1023	46.7714	33.209	153	2.45e-38	4	268	168	33209	573	568	cydC	310	788	BAG63812.1	523
1024	16.2304	39.785	67	1.61e-10	0	93	56	39785	573	567	cydC	475	127	BAG63812.1	35
1025	87.6091	26.892	151	2.74e-38	8	502	328	26892	573	568	cydC	90	548	XP_011542437.1	63
1026	45.3752	35.769	153	3.1e-38	5	260	158	35769	573	568	cydC	317	804	AAW31630.1	546
1027	30.0175	32.558	107	4.33e-23	1	172	114	32558	573	567	cydC	398	172	AAW31630.1	1
1028	45.3752	35.769	152	3.91e-38	5	260	158	35769	573	568	cydC	317	804	AAO73470.1	546
1029	30.0175	31.977	105	1.68e-22	1	172	115	31977	573	567	cydC	398	172	AAO73470.1	1
1030	45.3752	35.769	153	3.98e-38	5	260	158	35769	573	568	cydC	317	824	AAQ03033.1	566
1031	33.1588	33.684	122	4.77e-28	1	190	124	33684	573	567	cydC	380	192	AAQ03033.1	3
1032	45.3752	35.769	152	4.02e-38	5	260	158	35769	573	568	cydC	317	804	NP_848654.3	546
1033	30.0175	31.977	105	1.71e-22	1	172	115	31977	573	567	cydC	398	172	NP_848654.3	1
1034	41.0122	34.468	144	4.28e-38	3	235	149	34468	573	567	cydC	338	283	EAW76943.1	49
1035	46.7714	33.209	152	5.15e-38	4	268	168	33209	573	568	cydC	310	907	XP_016860656.1	642
1036	41.5358	33.613	119	6.41e-27	3	238	153	33613	573	567	cydC	335	246	XP_016860656.1	9
1037	87.6091	26.892	150	5.7e-38	8	502	328	26892	573	568	cydC	90	577	4AYT_A	92
1038	45.3752	35.385	152	5.77e-38	5	260	159	35385	573	568	cydC	317	804	ADV32637.1	546
1039	30.0175	31.977	105	1.48e-22	1	172	115	31977	573	567	cydC	398	172	ADV32637.1	1
1040	41.0122	34.468	147	7.11e-38	3	235	149	34468	573	567	cydC	338	393	EAW76941.1	159
1041	54.2757	30.868	148	8.24e-38	7	311	199	30868	573	571	cydC	270	445	BAC11171.1	142
1042	54.2757	30.868	145	9.32e-38	7	311	199	30868	573	571	cydC	270	346	BAG57529.1	43
1043	87.6091	26.892	150	2.29e-37	8	502	328	26892	573	568	cydC	90	727	NP_036221.2	242
1044	87.6091	26.693	149	2.68e-37	8	502	329	26693	573	568	cydC	90	608	4AYW_A	123
1045	87.4346	26.946	149	4.72e-37	8	501	328	26946	573	568	cydC	90	726	BAB20265.1	242
1046	94.0663	27.273	148	4.82e-37	13	539	336	27273	573	568	cydC	50	596	5OCH_F	94
1047	94.0663	26.902	148	5.46e-37	12	539	338	26902	573	568	cydC	50	596	5OCH_E	94
1048	94.0663	27.273	147	6.36e-37	13	539	336	27273	573	568	cydC	50	596	5OCH_B	94
1049	94.0663	27.273	147	6.79e-37	13	539	336	27273	573	568	cydC	50	596	5OCH_A	94
1050	87.6091	26.693	148	8.06e-37	8	502	329	26693	573	568	cydC	90	727	AAF78198.1	242
1051	94.2408	27.222	146	9.02e-37	13	540	337	27222	573	569	cydC	50	519	EAW54061.1	16
1052	48.1675	32.609	144	9.8e-37	3	276	178	32609	573	568	cydC	301	422	BAD18770.1	147
1053	94.0663	27.273	147	1.09e-36	13	539	336	27273	573	568	cydC	50	596	5OCH_H	94
1054	48.1675	32.609	144	1.28e-36	3	276	178	32609	573	568	cydC	301	431	XP_011542438.1	156
1055	94.4154	27.172	147	1.3e-36	14	541	334	27172	573	568	cydC	50	671	BAC04392.1	169
1056	94.2408	27.222	147	1.77e-36	13	540	337	27222	573	569	cydC	50	601	NP_001269222.1	98
1057	94.2408	27.222	146	2.1e-36	13	540	337	27222	573	569	cydC	50	608	EAW54064.1	105
1058	90.4014	26.641	147	3.02e-36	15	518	308	26641	573	571	cydC	63	696	NP_062570.1	242
1059	94.2408	27.222	147	3.06e-36	13	540	337	27222	573	569	cydC	50	689	NP_009119.2	186
1060	94.2408	27.222	146	3.82e-36	13	540	337	27222	573	569	cydC	50	655	EAW54060.1	152
1061	94.2408	27.222	146	4.05e-36	13	540	337	27222	573	569	cydC	50	706	NP_001269220.1	203
1062	94.9389	26.471	146	5.21e-36	12	544	336	26471	573	569	cydC	50	706	BAA92038.1	203
1063	86.0384	27.383	143	1.03e-35	10	493	327	27383	573	569	cydC	95	484	BAG52795.1	5
1064	41.7103	34.31	137	1.6e-35	3	239	151	34310	573	572	cydC	339	286	AAH43423.1	49
1065	41.7103	34.31	137	2.65e-35	3	239	151	34310	573	572	cydC	339	291	3NH6_A	54
1066	93.8918	26.766	144	2.85e-35	12	538	342	26766	573	569	cydC	50	689	AAD15748.1	186
1067	41.7103	34.31	139	5.16e-35	3	239	151	34310	573	572	cydC	339	421	EAW70699.1	184
1068	42.4084	33.745	139	8.55e-35	5	243	147	33745	573	567	cydC	338	419	CAA29547.1	178
1069	41.7103	34.31	140	1.34e-34	3	239	151	34310	573	572	cydC	339	496	AAC28653.1	259
1070	86.911	26.506	141	3.07e-34	11	498	337	26506	573	567	cydC	87	651	AAY24305.1	166
1071	40.3141	35.065	134	3.59e-34	3	231	144	35065	573	572	cydC	347	287	EAW70696.1	58
1072	86.911	26.506	141	3.92e-34	11	498	337	26506	573	567	cydC	87	685	XP_011510382.1	200
1073	45.8988	33.08	140	4.04e-34	4	263	169	33080	573	572	cydC	316	781	NP_001336757.1	520
1074	45.8988	33.08	140	4.36e-34	4	263	169	33080	573	572	cydC	316	751	EAW70695.1	490
1075	45.8988	33.08	140	4.83e-34	4	263	169	33080	573	572	cydC	316	751	BAB71347.1	490
1076	94.2408	27.037	139	5.78e-34	13	540	338	27037	573	569	cydC	50	601	BAG57613.1	98
1077	86.911	26.506	140	6e-34	11	498	337	26506	573	567	cydC	87	685	XP_016860654.1	200
1078	77.4869	27.027	117	2.34e-26	13	444	284	27027	573	512	cydC	93	1290	XP_016860654.1	863
1079	45.8988	33.08	140	6.12e-34	4	263	169	33080	573	572	cydC	316	881	AAG33617.1	620
1080	45.8988	33.08	140	6.49e-34	4	263	169	33080	573	572	cydC	316	827	NP_005680.1	566
1081	38.3944	33.636	132	2.78e-33	2	220	142	33636	573	571	cydC	355	283	EAW98356.1	65
1082	41.0122	37.021	128	1.61e-32	2	235	145	37021	573	571	cydC	339	246	6BZR_B	13
1083	82.548	26.85	136	2.15e-32	14	473	299	26850	573	552	cydC	100	1334	NP_150229.2	889
1084	40.8377	32.479	117	2.22e-26	5	234	137	32479	573	573	cydC	347	702	NP_150229.2	483
1085	38.3944	33.636	132	2.84e-32	2	220	142	33636	573	571	cydC	355	458	XP_024304676.1	240
1086	41.7103	33.473	134	3.05e-32	3	239	153	33473	573	572	cydC	339	556	BAD18782.1	319
1087	41.0122	37.021	127	3.16e-32	2	235	145	37021	573	571	cydC	339	263	EAW53951.1	30
1088	82.548	26.85	135	5.12e-32	14	473	299	26850	573	552	cydC	100	1334	EAW82711.1	889
1089	40.8377	32.479	117	2.42e-26	5	234	137	32479	573	573	cydC	347	702	EAW82711.1	483
1090	82.548	26.85	135	5.17e-32	14	473	299	26850	573	552	cydC	100	1334	AAK76740.1	889
1091	40.8377	32.479	117	2.32e-26	5	234	137	32479	573	573	cydC	347	702	AAK76740.1	483
1092	38.5689	33.484	134	5.28e-32	2	221	143	33484	573	571	cydC	354	676	NP_001229942.1	457
1093	52.1815	33.779	131	5.9e-32	4	299	191	33779	573	571	cydC	279	448	CAA65019.1	151
1094	37.8709	34.101	132	1.53e-31	2	217	139	34101	573	571	cydC	358	633	EAW98359.1	418
1095	83.4206	26.987	132	1.53e-31	14	478	287	26987	573	568	cydC	113	730	BAG64170.1	293
1096	16.2304	39.785	77	1.41e-13	0	93	56	39785	573	567	cydC	475	93	BAG64170.1	1
1097	81.5009	29.336	132	4.74e-31	10	467	308	29336	573	571	cydC	117	1487	XP_011520781.1	1031
1098	83.0716	24.58	90.9	8.32e-18	12	476	317	24580	573	564	cydC	100	834	XP_011520781.1	390
1099	81.5009	29.336	132	5.07e-31	10	467	308	29336	573	571	cydC	117	1498	O95255.2	1042
1100	83.5951	24.426	90.9	7.39e-18	12	479	325	24426	573	564	cydC	100	845	O95255.2	390
1101	41.3613	31.224	123	5.17e-31	4	237	144	31224	573	569	cydC	338	225	2CBZ_A	3
1102	81.5009	29.336	132	5.35e-31	10	467	308	29336	573	571	cydC	117	1498	AAC79696.1	1042
1103	83.5951	24.426	90.9	7.85e-18	12	479	325	24426	573	564	cydC	100	845	AAC79696.1	390
1104	81.5009	29.336	132	5.42e-31	10	467	308	29336	573	571	cydC	117	1510	XP_024306029.1	1054
1105	83.5951	24.426	90.9	7.94e-18	12	479	325	24426	573	564	cydC	100	857	XP_024306029.1	402
1106	81.5009	29.336	132	5.61e-31	10	467	308	29336	573	571	cydC	117	1442	XP_016878701.1	986
1108	38.2199	36.073	123	5.63e-31	3	219	133	36073	573	568	cydC	356	218	AAA84438.1	1
1109	81.5009	29.336	132	5.7e-31	10	467	308	29336	573	571	cydC	117	1498	NP_001162.4	1042
1110	83.5951	24.426	90.9	8.13e-18	12	479	325	24426	573	564	cydC	100	845	NP_001162.4	390
1111	81.5009	29.336	132	5.7e-31	10	467	308	29336	573	571	cydC	117	1498	AAI31733.1	1042
1112	40.4887	28.017	90.5	9.42e-18	4	232	148	28017	573	564	cydC	338	845	AAI31733.1	628
1113	81.5009	29.336	131	6.13e-31	10	467	308	29336	573	571	cydC	117	1498	CAO81806.1	1042
1114	83.5951	24.426	90.9	8.49e-18	12	479	325	24426	573	564	cydC	100	845	CAO81806.1	390
1115	81.5009	29.336	131	6.96e-31	10	467	308	29336	573	571	cydC	117	1384	XP_011520782.1	928
1116	83.5951	24.426	90.5	9.94e-18	12	479	325	24426	573	564	cydC	100	731	XP_011520782.1	276
1117	81.5009	29.336	131	7.48e-31	10	467	308	29336	573	571	cydC	117	1384	NP_001338729.1	928
1118	83.5951	24.426	90.5	1.07e-17	12	479	325	24426	573	564	cydC	100	731	NP_001338729.1	276
1119	83.2461	26.625	131	1.05e-30	10	477	308	26625	573	567	cydC	113	1481	XP_016878729.1	1025
1120	17.6265	38.614	75.9	4.36e-13	1	101	59	38614	573	569	cydC	472	824	XP_016878729.1	724
1122	83.9442	26.195	130	1.13e-30	10	481	313	26195	573	571	cydC	113	1502	XP_016878727.1	1042
1123	41.3613	31.224	123	2.61e-28	4	237	144	31224	573	569	cydC	338	841	XP_016878727.1	619
1124	83.2461	26.415	130	1.15e-30	10	477	309	26415	573	567	cydC	113	1464	EAW53946.1	1008
1125	41.3613	31.224	123	2.66e-28	4	237	144	31224	573	569	cydC	338	807	EAW53946.1	585
1126	81.5009	29.336	130	1.16e-30	10	467	308	29336	573	571	cydC	117	1018	EAW53950.1	562
1127	40.4887	28.017	89.4	1.9e-17	4	232	148	28017	573	564	cydC	338	365	EAW53950.1	148
1128	83.9442	26.403	130	1.16e-30	10	481	312	26403	573	571	cydC	113	1395	AAB83982.1	935
1131	83.9442	26.195	130	1.2e-30	10	481	313	26195	573	571	cydC	113	1411	EAW53947.1	951
1132	41.3613	31.224	123	3.36e-28	4	237	144	31224	573	569	cydC	338	750	EAW53947.1	528
1133	83.9442	26.403	130	1.21e-30	10	481	312	26403	573	571	cydC	113	1458	EAW53945.1	998
1134	17.6265	38.614	75.5	4.5e-13	1	101	59	38614	573	569	cydC	472	797	EAW53945.1	697
1136	83.9442	26.403	130	1.25e-30	10	481	312	26403	573	571	cydC	113	1517	EAW53939.1	1057
1137	41.3613	31.224	124	2.51e-28	4	237	144	31224	573	569	cydC	338	856	EAW53939.1	634
1138	83.9442	26.403	130	1.26e-30	10	481	312	26403	573	571	cydC	113	1526	NP_004987.2	1066
1139	41.3613	31.224	124	2.51e-28	4	237	144	31224	573	569	cydC	338	865	NP_004987.2	643
1140	83.9442	26.403	130	1.27e-30	10	481	312	26403	573	571	cydC	113	1461	EAW53938.1	1001
1141	40.4887	26.724	81.3	8.85e-15	3	232	105	26724	573	569	cydC	338	800	EAW53938.1	634
1142	83.2461	26.625	130	1.27e-30	10	477	308	26625	573	567	cydC	113	1540	XP_016878726.1	1084
1143	41.3613	31.224	123	2.62e-28	4	237	144	31224	573	569	cydC	338	883	XP_016878726.1	661
1144	83.9442	26.403	130	1.29e-30	10	481	312	26403	573	571	cydC	113	1510	AAB83979.1	1050
1145	41.3613	31.224	123	2.57e-28	4	237	144	31224	573	569	cydC	338	849	AAB83979.1	627
1146	83.9442	26.403	130	1.29e-30	10	481	312	26403	573	571	cydC	113	1518	XP_011520799.1	1058
1147	41.3613	31.224	123	2.74e-28	4	237	144	31224	573	569	cydC	338	857	XP_011520799.1	635
1148	83.9442	26.403	130	1.31e-30	10	481	312	26403	573	571	cydC	113	1454	AAB83980.1	994
1149	40.4887	26.724	80.9	9.23e-15	3	232	105	26724	573	569	cydC	338	793	AAB83980.1	627
1150	83.9442	26.403	130	1.32e-30	10	481	312	26403	573	571	cydC	113	1401	EAW53948.1	941
1151	17.6265	38.614	75.5	5.29e-13	1	101	59	38614	573	569	cydC	472	740	EAW53948.1	640
1153	83.2461	26.415	130	1.34e-30	10	477	309	26415	573	567	cydC	113	1452	XP_016878730.1	996
1154	41.3613	31.224	123	2.77e-28	4	237	144	31224	573	569	cydC	338	795	XP_016878730.1	573
1155	83.9442	26.403	130	1.35e-30	10	481	312	26403	573	571	cydC	113	1451	AAB83981.1	991
1156	17.6265	38.614	75.5	4.38e-13	1	101	59	38614	573	569	cydC	472	790	AAB83981.1	690
1158	83.9442	26.403	130	1.37e-30	10	481	312	26403	573	571	cydC	113	1475	EAW53949.1	1015
1159	41.3613	31.224	124	2.37e-28	4	237	144	31224	573	569	cydC	338	814	EAW53949.1	592
1160	83.9442	26.195	130	1.38e-30	10	481	313	26195	573	571	cydC	113	1418	EAW53940.1	958
1161	41.3613	31.224	123	3.03e-28	4	237	144	31224	573	569	cydC	338	757	EAW53940.1	535
1162	83.9442	26.403	130	1.39e-30	10	481	312	26403	573	571	cydC	113	1404	EAW53943.1	944
1163	40.4887	26.724	80.9	9.46e-15	3	232	105	26724	573	569	cydC	338	743	EAW53943.1	577
1164	83.9442	26.403	130	1.39e-30	10	481	312	26403	573	571	cydC	113	1470	EAW53942.1	1010
1165	41.3613	31.224	123	3.13e-28	4	237	144	31224	573	569	cydC	338	799	EAW53942.1	577
1166	83.9442	26.403	130	1.4e-30	10	481	312	26403	573	571	cydC	113	1526	AAB46616.1	1066
1167	41.3613	31.224	123	2.7e-28	4	237	144	31224	573	569	cydC	338	865	AAB46616.1	643
1168	83.9442	26.403	130	1.44e-30	10	481	312	26403	573	571	cydC	113	1460	EAW53941.1	1000
1169	41.3613	31.224	123	2.9e-28	4	237	144	31224	573	569	cydC	338	799	EAW53941.1	577
1170	83.9442	26.195	130	1.52e-30	10	481	313	26195	573	571	cydC	113	1434	BAD92357.1	974
1171	41.3613	31.224	123	3.38e-28	4	237	144	31224	573	569	cydC	338	763	BAD92357.1	541
1172	83.9442	26.403	130	1.59e-30	10	481	312	26403	573	571	cydC	113	1345	EAW53937.1	885
1175	83.2461	26.625	130	1.64e-30	10	477	308	26625	573	567	cydC	113	1494	XP_016878728.1	1038
1176	41.3613	31.224	123	2.78e-28	4	237	144	31224	573	569	cydC	338	837	XP_016878728.1	615
1177	83.2461	26.415	130	1.72e-30	10	477	309	26415	573	567	cydC	113	1491	XP_011520800.1	1035
1178	41.3613	31.224	123	3.66e-28	4	237	144	31224	573	569	cydC	338	834	XP_011520800.1	612
1179	83.2461	26.625	130	2.03e-30	10	477	308	26625	573	567	cydC	113	1425	XP_016878731.1	969
1182	42.2339	31.818	121	5.33e-30	5	242	136	31818	573	569	cydC	338	250	4C3Z_A	28
1183	90.7504	25	127	6.15e-30	18	520	330	25000	573	550	cydC	54	680	ARB08502.1	198
1184	90.7504	25.192	127	6.26e-30	18	520	329	25192	573	550	cydC	54	680	AAA59841.1	198
1185	90.7504	25	127	6.93e-30	18	520	330	25000	573	550	cydC	54	616	AAA79901.1	134
1186	90.7504	25	127	9.6e-30	18	520	330	25000	573	550	cydC	54	680	BAB71769.1	198
1187	90.7504	25.192	127	1.04e-29	18	520	329	25192	573	550	cydC	54	680	ARB08488.1	198
1188	90.7504	25.192	127	1.05e-29	18	520	329	25192	573	550	cydC	54	680	ARB08490.1	198
1189	90.7504	25	127	1.06e-29	18	520	330	25000	573	550	cydC	54	680	NP_000535.3	198
1190	41.0122	33.191	122	1.24e-29	2	235	154	33191	573	571	cydC	339	311	AAH01636.1	78
1191	83.9442	25.988	127	1.33e-29	10	481	314	25988	573	571	cydC	113	1210	CAH18691.1	750
1192	41.3613	31.224	123	3.6e-28	4	237	144	31224	573	569	cydC	338	539	CAH18691.1	317
1193	90.7504	25	126	1.39e-29	18	520	330	25000	573	550	cydC	54	681	BAD92190.1	199
1194	90.7504	25	126	1.54e-29	18	520	330	25000	573	550	cydC	54	680	ARB08494.1	198
1195	90.7504	25	126	1.64e-29	18	520	330	25000	573	550	cydC	54	680	NP_001276972.1	198
1196	90.7504	25	126	1.67e-29	18	520	330	25000	573	550	cydC	54	680	CAA80523.1	198
1197	89.0052	24.706	124	1.95e-29	16	510	327	24706	573	550	cydC	63	477	AAD23601.1	3
1198	81.5009	29.122	127	2.3e-29	10	467	309	29122	573	571	cydC	117	1498	AAD51293.1	1042
1199	83.5951	24.426	90.5	1.08e-17	12	479	325	24426	573	564	cydC	100	845	AAD51293.1	390
1200	89.0052	24.706	124	3.5e-29	16	510	327	24706	573	550	cydC	63	477	AAD23381.1	3
1201	82.0244	25.532	126	3.98e-29	10	470	313	25532	573	567	cydC	117	1529	NP_000383.2	1078
1202	40.8377	27.35	107	6e-23	4	234	151	27350	573	566	cydC	338	855	NP_000383.2	636
1203	82.0244	25.532	126	4.02e-29	10	470	313	25532	573	567	cydC	117	1529	AAB39892.1	1078
1204	40.8377	27.35	107	5.95e-23	4	234	151	27350	573	566	cydC	338	855	AAB39892.1	636
1205	41.0122	33.191	122	4.95e-29	2	235	154	33191	573	571	cydC	339	396	AAC15784.1	163
1206	82.0244	25.532	125	5.76e-29	10	470	313	25532	573	567	cydC	117	1297	XP_006717693.1	846
1207	40.8377	27.35	106	7.74e-23	4	234	151	27350	573	566	cydC	338	623	XP_006717693.1	404
1208	82.0244	25.532	125	6.88e-29	10	470	313	25532	573	567	cydC	117	1529	AAB09422.1	1078
1209	40.8377	27.35	107	6.22e-23	4	234	151	27350	573	566	cydC	338	855	AAB09422.1	636
1210	42.9319	29.268	120	7.35e-29	3	246	169	29268	573	550	cydC	308	365	AAD50509.1	122
1211	78.7086	26.829	124	7.36e-29	12	451	303	26829	573	552	cydC	117	732	XP_011521700.1	294
1212	18.6736	42.056	93.2	1.13e-18	1	107	61	42056	573	573	cydC	468	110	XP_011521700.1	4
1213	78.7086	26.829	125	9.24e-29	12	451	303	26829	573	552	cydC	117	1355	AAK58869.1	917
1214	40.6632	32.618	119	8.22e-27	6	233	134	32618	573	573	cydC	349	733	AAK58869.1	516
1215	41.3613	31.224	124	9.72e-29	4	237	144	31224	573	569	cydC	338	883	XP_016878732.1	661
1216	78.7086	26.829	125	9.84e-29	12	451	303	26829	573	552	cydC	117	1355	NP_149163.2	917
1217	40.6632	32.618	119	8.68e-27	6	233	134	32618	573	573	cydC	349	733	NP_149163.2	516
1218	78.7086	26.829	124	1.05e-28	12	451	303	26829	573	552	cydC	117	1319	XP_016879290.1	881
1219	40.6632	32.618	119	9.38e-27	6	233	134	32618	573	573	cydC	349	697	XP_016879290.1	480
1220	78.7086	26.829	124	1.08e-28	12	451	303	26829	573	552	cydC	117	1357	NP_001357425.1	919
1221	40.6632	32.618	119	8.76e-27	6	233	134	32618	573	573	cydC	349	733	NP_001357425.1	516
1222	78.7086	26.829	124	1.39e-28	12	451	303	26829	573	552	cydC	117	1036	XP_011521699.1	598
1223	40.6632	32.618	118	1.03e-26	6	233	134	32618	573	573	cydC	349	414	XP_011521699.1	197
1224	41.3613	31.224	124	1.8e-28	4	237	144	31224	573	569	cydC	338	849	AAB83983.1	627
1225	67.1902	24.675	73.6	2.21e-12	10	385	248	24675	573	475	cydC	113	1414	AAB83983.1	1050
1226	82.0244	25.532	124	1.81e-28	10	470	313	25532	573	567	cydC	117	1529	CAB45309.1	1078
1227	40.8377	27.35	107	5.45e-23	4	234	151	27350	573	566	cydC	338	855	CAB45309.1	636
1228	41.3613	31.224	123	1.83e-28	4	237	144	31224	573	569	cydC	338	350	AAC05808.1	128
1229	41.3613	31.224	124	1.92e-28	4	237	144	31224	573	569	cydC	338	856	EAW53944.1	634
1230	67.1902	24.675	73.6	2.25e-12	10	385	248	24675	573	475	cydC	113	1421	EAW53944.1	1057
1231	41.3613	31.224	124	2.36e-28	4	237	144	31224	573	569	cydC	338	799	EAW53936.1	577
1232	67.1902	24.675	73.6	2.12e-12	10	385	248	24675	573	475	cydC	113	1364	EAW53936.1	1000
1233	78.7086	26.829	123	2.45e-28	12	451	303	26829	573	552	cydC	117	1355	AAK19755.1	917
1234	40.6632	32.189	117	2.42e-26	6	233	135	32189	573	573	cydC	349	733	AAK19755.1	516
1235	63.0017	24.654	121	2.94e-28	6	361	262	24654	573	571	cydC	217	540	BAH13680.1	184
1236	63.0017	24.931	120	1.47e-27	6	361	261	24931	573	571	cydC	217	741	AAC12905.1	385
1237	90.7504	24.615	119	2.44e-27	18	520	332	24615	573	550	cydC	54	680	BAD97020.1	198
1238	63.0017	24.931	120	2.82e-27	6	361	261	24931	573	571	cydC	217	801	ARB08471.1	445
1239	63.0017	24.654	119	3.33e-27	6	361	262	24654	573	571	cydC	217	741	AAC12903.1	385
1240	63.0017	24.654	119	3.54e-27	6	361	262	24654	573	571	cydC	217	741	AAS55411.1	385
1241	63.0017	24.654	119	5.19e-27	6	361	262	24654	573	571	cydC	217	801	ARB08460.1	445
1242	63.0017	24.654	119	5.43e-27	6	361	262	24654	573	571	cydC	217	801	ARB08466.1	445
1243	87.6091	26.494	119	5.44e-27	13	502	313	26494	573	531	cydC	50	651	NP_001269221.1	186
1244	40.6632	32.618	119	8.05e-27	6	233	134	32618	573	573	cydC	349	733	AAL99902.1	516
1245	78.3595	24.276	94.7	5.16e-19	12	449	279	24276	573	552	cydC	117	1317	AAL99902.1	917
1246	95.637	26.642	118	8.36e-27	20	548	331	26642	573	567	cydC	52	668	EAW78306.1	160
1247	40.6632	32.618	119	8.65e-27	6	233	134	32618	573	573	cydC	349	733	NP_660187.1	516
1248	78.3595	24.276	94.4	6.59e-19	12	449	279	24276	573	552	cydC	117	1317	NP_660187.1	917
1249	95.637	26.642	118	9.67e-27	20	548	331	26642	573	567	cydC	52	1245	XP_016860981.1	737
1250	38.0454	32.569	105	1.18e-22	6	218	128	32569	573	566	cydC	353	599	XP_016860981.1	397
1251	95.637	26.642	118	1.06e-26	20	548	331	26642	573	567	cydC	52	1416	BAD92691.1	908
1252	38.0454	32.569	105	2.11e-22	6	218	128	32569	573	566	cydC	353	770	BAD92691.1	568
1253	38.7435	33.333	118	1.06e-26	5	222	129	33333	573	573	cydC	356	733	BAG63044.1	527
1254	38.7435	33.333	118	1.08e-26	5	222	129	33333	573	573	cydC	356	733	XP_016879292.1	527
1255	95.637	26.642	118	1.14e-26	20	548	331	26642	573	567	cydC	52	1423	AAD04169.1	915
1256	38.0454	32.569	105	2.21e-22	6	218	128	32569	573	566	cydC	353	777	AAD04169.1	575
1257	95.637	26.642	118	1.19e-26	20	548	331	26642	573	567	cydC	52	1423	NP_005679.2	915
1258	38.0454	32.569	105	2.29e-22	6	218	128	32569	573	566	cydC	353	777	NP_005679.2	575
1259	95.637	26.642	118	1.2e-26	20	548	331	26642	573	567	cydC	52	1426	EAW78310.1	918
1260	38.5689	32.579	103	7.94e-22	6	221	127	32579	573	566	cydC	353	780	EAW78310.1	575
1261	95.637	26.642	118	1.24e-26	20	548	331	26642	573	567	cydC	52	1423	AAD37716.1	915
1262	38.0454	32.11	104	3.56e-22	6	218	129	32110	573	566	cydC	353	777	AAD37716.1	575
1263	63.0017	24.377	116	1.31e-26	6	361	263	24377	573	571	cydC	217	540	NP_001278951.1	184
1264	40.8377	32.479	118	1.41e-26	5	234	137	32479	573	573	cydC	347	702	EAW82705.1	483
1265	40.8377	32.479	117	1.54e-26	5	234	137	32479	573	573	cydC	347	702	AAL79528.1	483
1266	40.8377	32.479	117	1.54e-26	5	234	137	32479	573	573	cydC	347	644	AAO40749.1	425
1267	95.637	26.642	117	1.62e-26	20	548	331	26642	573	567	cydC	52	951	NP_001306961.1	443
1268	38.0454	32.569	103	4.22e-22	6	218	128	32569	573	566	cydC	353	305	NP_001306961.1	103
1269	95.637	26.642	118	1.68e-26	20	548	331	26642	573	567	cydC	52	1423	BAA76608.1	915
1270	38.0454	32.569	105	2.42e-22	6	218	128	32569	573	566	cydC	353	777	BAA76608.1	575
1271	86.3874	27.071	118	1.78e-26	15	495	322	27071	573	567	cydC	90	1524	BAD92191.1	1052
1272	47.993	27.636	102	1.79e-21	6	275	174	27636	573	569	cydC	303	854	BAD92191.1	597
1273	95.637	26.642	117	1.82e-26	20	548	331	26642	573	567	cydC	52	932	BAA22887.1	424
1274	38.0454	32.569	104	3.28e-22	6	218	128	32569	573	566	cydC	353	286	BAA22887.1	84
1275	81.8499	26.013	117	1.84e-26	15	469	300	26013	573	513	cydC	63	681	NP_001229943.1	242
1276	81.6754	27.778	117	1.86e-26	14	468	306	27778	573	567	cydC	117	1518	BAA28146.1	1066
1277	47.993	27.636	102	1.59e-21	6	275	174	27636	573	569	cydC	303	848	BAA28146.1	591
1278	81.6754	27.778	117	1.86e-26	14	468	306	27778	573	567	cydC	117	1518	NP_003777.2	1066
1279	47.993	27.636	102	1.64e-21	6	275	174	27636	573	569	cydC	303	848	NP_003777.2	591
1280	81.3264	25.966	117	1.87e-26	15	466	298	25966	573	510	cydC	63	678	NP_982269.2	242
1281	81.6754	27.778	117	1.88e-26	14	468	306	27778	573	567	cydC	117	1518	CAA76658.2	1066
1282	47.993	27.636	102	1.71e-21	6	275	174	27636	573	569	cydC	303	848	CAA76658.2	591
1283	40.8377	31.197	115	1.9e-26	4	234	153	31197	573	568	cydC	339	443	AAB46340.2	214
1284	83.0716	27.101	115	1.97e-26	14	476	301	27101	573	567	cydC	116	476	AAB71756.1	23
1285	40.8377	32.479	117	2.16e-26	5	234	137	32479	573	573	cydC	347	702	EAW82707.1	483
1286	40.8377	32.479	117	2.26e-26	5	234	137	32479	573	573	cydC	347	702	AAL79529.1	483
1287	81.6754	27.778	117	2.28e-26	14	468	306	27778	573	567	cydC	117	1519	AAD01430.1	1067
1288	47.993	27.636	102	1.87e-21	6	275	174	27636	573	569	cydC	303	849	AAD01430.1	592
1289	53.4031	25.817	112	2.39e-26	5	306	220	25817	573	571	cydC	272	322	EAX03650.1	18
1290	63.0017	24.377	116	2.84e-26	6	361	263	24377	573	571	cydC	217	741	AAC12906.1	385
1291	63.0017	24.377	116	2.84e-26	6	361	263	24377	573	571	cydC	217	741	5U1D_A	385
1292	63.0017	24.377	116	2.9e-26	6	361	263	24377	573	571	cydC	217	694	EAX03651.1	338
1293	41.1867	33.051	111	3.08e-26	4	236	151	33051	573	567	cydC	336	276	AAD38185.1	44
1294	63.0017	24.377	116	4.03e-26	6	361	263	24377	573	571	cydC	217	801	NP_000584.2	445
1295	63.0017	24.377	116	4.03e-26	6	361	263	24377	573	571	cydC	217	801	ARB08470.1	445
1296	63.0017	24.377	116	4.06e-26	6	361	263	24377	573	571	cydC	217	801	BAG36500.1	445
1297	81.6754	27.564	116	4.37e-26	14	468	307	27564	573	567	cydC	117	1518	AAC34668.1	1066
1298	47.993	27.636	102	1.68e-21	6	275	174	27636	573	569	cydC	303	848	AAC34668.1	591
1299	63.3508	25.069	115	5.47e-26	9	363	255	25069	573	571	cydC	217	738	EAX03652.1	385
1300	91.623	24	115	8.16e-26	16	525	322	24000	573	568	cydC	90	1421	ABC87055.1	928
1301	36.4747	30.622	90.9	7.58e-18	5	209	126	30622	573	559	cydC	355	615	ABC87055.1	422
1302	91.623	24	115	8.49e-26	16	525	322	24000	573	568	cydC	90	1439	ABC87053.1	946
1304	91.623	24	115	9.04e-26	16	525	322	24000	573	568	cydC	90	1439	ABD72213.1	946
1305	36.4747	30.622	90.1	1.29e-17	5	209	126	30622	573	559	cydC	355	633	ABD72213.1	440
1306	91.623	24	115	9.12e-26	16	525	322	24000	573	568	cydC	90	1439	NP_000483.3	946
1307	36.4747	30.622	90.1	1.35e-17	5	209	126	30622	573	559	cydC	355	633	NP_000483.3	440
1308	91.623	24	115	9.88e-26	16	525	322	24000	573	568	cydC	90	1439	AAC13657.1	946
1309	36.4747	30.622	90.9	8.23e-18	5	209	126	30622	573	559	cydC	355	633	AAC13657.1	440
1310	91.623	24	115	1.02e-25	16	525	322	24000	573	568	cydC	90	1439	AAA35680.1	946
1311	36.4747	30.622	92	3.6e-18	5	209	126	30622	573	559	cydC	355	633	AAA35680.1	440
1312	91.623	24	115	1.04e-25	16	525	322	24000	573	568	cydC	90	1439	5UAK_A	946
1313	36.4747	30.622	90.1	1.4e-17	5	209	126	30622	573	559	cydC	355	633	5UAK_A	440
1314	91.623	24	115	1.15e-25	16	525	322	24000	573	568	cydC	90	1439	ABD72187.1	946
1315	36.4747	30.622	90.5	8.9e-18	5	209	126	30622	573	559	cydC	355	633	ABD72187.1	440
1316	91.623	24	115	1.3e-25	16	525	322	24000	573	568	cydC	90	1439	ABD72201.1	946
1317	36.3002	30.769	90.5	1.14e-17	5	208	125	30769	573	559	cydC	356	633	ABD72201.1	441
1318	91.623	24	115	1.31e-25	16	525	322	24000	573	568	cydC	90	1439	ABC87059.1	946
1319	36.3002	30.769	90.1	1.5e-17	5	208	125	30769	573	559	cydC	356	633	ABC87059.1	441
1320	41.7103	28.452	108	1.49e-25	4	239	165	28452	573	571	cydC	339	253	1JJ7_A	15
1321	64.0489	25.613	114	2.16e-25	10	367	251	25613	573	571	cydC	217	801	ARB08461.1	445
1322	91.623	23.81	114	2.95e-25	16	525	323	23810	573	568	cydC	90	1439	6MSM_A	946
1323	36.4747	30.622	90.1	1.39e-17	5	209	126	30622	573	559	cydC	355	633	6MSM_A	440
1324	92.8447	26.504	113	4.14e-25	19	532	309	26504	573	567	cydC	52	1380	AAO49801.1	915
1325	38.0454	32.569	105	2.23e-22	6	218	128	32569	573	566	cydC	353	777	AAO49801.1	575
1326	36.4747	33.014	107	4.99e-25	4	209	132	33014	573	543	cydC	339	258	AAW33656.1	54
1327	36.4747	32.536	112	7.19e-25	5	209	122	32536	573	560	cydC	356	538	BAD92210.1	345
1328	36.4747	32.536	112	9.47e-25	5	209	122	32536	573	560	cydC	356	578	XP_016875811.1	385
1329	36.4747	32.536	112	1.11e-24	5	209	122	32536	573	560	cydC	356	621	XP_016875809.1	428
1330	36.4747	32.536	112	1.21e-24	5	209	122	32536	573	560	cydC	356	621	BAF83006.1	428
1331	36.4747	32.536	112	1.21e-24	5	209	122	32536	573	560	cydC	356	621	NP_001098985.1	428
1332	36.4747	32.536	111	1.8e-24	5	209	122	32536	573	560	cydC	356	546	NP_001288759.1	353
1333	36.4747	32.536	110	3.44e-24	5	209	122	32536	573	560	cydC	356	578	XP_005254082.1	385
1334	60.5585	25.937	110	5.17e-24	9	347	219	25937	573	573	cydC	243	1233	XP_005254082.1	909
1335	36.4747	32.536	110	3.52e-24	5	209	122	32536	573	560	cydC	356	621	AAL88745.1	428
1336	60.5585	25.937	110	4.8e-24	9	347	219	25937	573	573	cydC	243	1276	AAL88745.1	952
1337	36.4747	32.536	110	3.65e-24	5	209	122	32536	573	560	cydC	356	621	AAC27076.1	428
1338	60.5585	25.937	110	6.55e-24	9	347	219	25937	573	573	cydC	243	1276	AAC27076.1	952
1339	36.4747	32.536	110	3.82e-24	5	209	122	32536	573	560	cydC	356	621	NP_001288758.1	428
1340	60.5585	25.937	110	4.73e-24	9	347	219	25937	573	573	cydC	243	1229	NP_001288758.1	905
1341	36.4747	32.536	110	3.92e-24	5	209	122	32536	573	560	cydC	356	621	NP_005836.2	428
1342	60.5585	25.937	110	5.25e-24	9	347	219	25937	573	573	cydC	243	1276	NP_005836.2	952
1343	83.7696	25	109	6.13e-24	17	480	302	25000	573	510	cydC	54	642	AAD12059.1	198
1344	36.4747	32.536	109	7.38e-24	5	209	122	32536	573	560	cydC	356	211	AAC27077.1	18
1345	60.5585	25.937	108	1.21e-23	9	347	219	25937	573	573	cydC	243	866	AAC27077.1	542
1346	60.5585	25.937	108	9.1e-24	9	347	219	25937	573	573	cydC	243	771	XP_016875810.1	447
1347	18.3246	37.143	78.2	5.34e-14	2	105	64	37143	573	560	cydC	457	116	XP_016875810.1	13
1348	37.3473	31.308	106	9.19e-24	3	214	143	31308	573	550	cydC	339	231	3GD7_A	20
1349	83.7696	24.792	108	1.09e-23	17	480	303	24792	573	510	cydC	54	642	NP_061313.2	198
1350	38.7435	36.036	108	1.28e-23	3	222	136	36036	573	559	cydC	341	572	EAX04184.1	354
1351	83.7696	25	108	1.33e-23	17	480	302	25000	573	510	cydC	54	642	BAG61534.1	198
1352	38.7435	36.036	103	1.68e-23	3	222	136	36036	573	559	cydC	341	256	AAH24103.1	38
1353	51.3089	32.653	108	1.76e-23	5	294	188	32653	573	559	cydC	272	1438	NP_258261.2	1149
1354	35.7766	30.732	84.7	6.59e-16	5	205	124	30732	573	560	cydC	361	784	NP_258261.2	593
1355	51.3089	32.653	108	1.95e-23	5	294	188	32653	573	559	cydC	272	1466	NP_001185863.1	1177
1356	43.9791	28.968	86.7	1.85e-16	8	252	157	28968	573	560	cydC	316	812	NP_001185863.1	576
1357	51.3089	32.653	108	2.14e-23	5	294	188	32653	573	559	cydC	272	1298	EAX04180.1	1009
1358	43.63	28.4	86.3	2.22e-16	7	250	161	28400	573	560	cydC	316	644	EAX04180.1	408
1359	51.3089	32.653	108	2.25e-23	5	294	188	32653	573	559	cydC	272	1517	XP_011513276.2	1228
1360	43.9791	28.968	86.7	1.85e-16	8	252	157	28968	573	560	cydC	316	863	XP_011513276.2	627
1361	51.3089	32.653	108	2.31e-23	5	294	188	32653	573	559	cydC	272	1481	XP_016866935.1	1192
1362	35.7766	30.732	84.3	8.47e-16	5	205	124	30732	573	560	cydC	361	827	XP_016866935.1	636
1363	51.3089	32.653	108	2.32e-23	5	294	188	32653	573	559	cydC	272	1532	XP_016866934.1	1243
1364	35.7766	30.732	84.3	8.54e-16	5	205	124	30732	573	560	cydC	361	878	XP_016866934.1	687
1365	38.7435	36.036	107	3.29e-23	3	222	136	36036	573	559	cydC	341	1022	NP_001337447.1	804
1366	43.63	28.4	85.1	4.45e-16	7	250	161	28400	573	560	cydC	316	368	NP_001337447.1	132
1367	38.7435	36.036	107	3.3e-23	3	222	136	36036	573	559	cydC	341	674	CAB63742.1	456
1368	38.7435	36.036	107	3.47e-23	3	222	136	36036	573	559	cydC	341	1037	XP_016866943.1	819
1369	35.4276	30.049	84	9.06e-16	4	203	128	30049	573	560	cydC	361	383	XP_016866943.1	192
1370	40.8377	27.35	107	3.88e-23	4	234	151	27350	573	566	cydC	338	855	XP_006717694.1	636
1371	38.7435	36.036	107	4.32e-23	3	222	136	36036	573	559	cydC	341	815	XP_011513287.1	597
1372	23.7347	33.824	70.1	1.91e-11	3	136	86	33824	573	560	cydC	428	161	XP_011513287.1	27
1373	40.8377	27.35	107	4.87e-23	4	234	151	27350	573	566	cydC	338	855	XP_016871164.1	636
1374	40.8377	27.35	106	5.93e-23	4	234	151	27350	573	566	cydC	338	855	XP_011537593.1	636
1375	38.7435	36.036	106	5.99e-23	3	222	136	36036	573	559	cydC	341	680	BAB15736.1	462
1376	53.4031	32.026	106	1.16e-22	6	306	196	32026	573	571	cydC	272	1447	AAK39642.1	1148
1377	35.7766	30.244	80.9	1.19e-14	5	205	125	30244	573	560	cydC	361	783	AAK39642.1	592
1378	38.0454	32.569	105	1.65e-22	6	218	128	32569	573	566	cydC	353	777	XP_011510617.1	575
1379	71.9023	25.485	69.3	3.86e-11	17	412	240	25485	573	434	cydC	52	1288	XP_011510617.1	915
1380	39.7906	28.509	105	1.77e-22	2	228	160	28509	573	564	cydC	339	1491	XP_005253347.1	1265
1381	37.6963	23.611	68.2	9.64e-11	4	216	120	23611	573	568	cydC	356	861	XP_005253347.1	688
1382	25.3054	38.621	100	2.09e-22	1	145	87	38621	573	567	cydC	425	224	ALQ33332.1	80
1383	39.7906	28.509	105	2.15e-22	2	228	160	28509	573	564	cydC	339	1525	XP_005253346.1	1299
1384	38.918	25.561	85.5	3.9e-16	5	223	151	25561	573	573	cydC	356	900	XP_005253346.1	688
1385	39.7906	28.509	105	2.23e-22	2	228	160	28509	573	564	cydC	339	1538	NP_064693.2	1312
1386	39.6161	26.432	87.8	6.66e-17	6	227	157	26432	573	573	cydC	356	913	NP_064693.2	688
1387	39.7906	28.509	105	2.42e-22	2	228	160	28509	573	564	cydC	339	1473	EAW96460.1	1247
1388	38.7435	26.577	87.8	7.9e-17	6	222	153	26577	573	568	cydC	356	843	EAW96460.1	623
1389	38.0454	32.569	104	2.48e-22	6	218	128	32569	573	566	cydC	353	675	BAD92340.1	473
1390	39.7906	28.509	104	4.03e-22	2	228	160	28509	573	564	cydC	339	1538	AAC16058.1	1312
1391	39.6161	26.432	87.8	6.55e-17	6	227	157	26432	573	573	cydC	356	913	AAC16058.1	688
1392	47.993	27.636	102	1.12e-21	6	275	174	27636	573	569	cydC	303	848	EAW94590.1	591
1393	47.993	27.636	102	1.12e-21	6	275	174	27636	573	569	cydC	303	848	AAD02846.1	591
1394	81.6754	27.564	102	1.62e-21	16	468	294	27564	573	567	cydC	117	1505	CAC69553.1	1066
1395	47.993	27.636	102	1.65e-21	6	275	174	27636	573	569	cydC	303	848	CAC69553.1	591
1396	47.993	27.636	101	2.75e-21	6	275	174	27636	573	569	cydC	303	623	EAW94591.1	366
1397	27.3997	36.306	94.7	2.77e-21	1	157	98	36306	573	569	cydC	415	161	EAW54059.1	5
1398	35.6021	31.863	95.9	2.87e-21	4	204	131	31863	573	568	cydC	369	200	AAW33657.1	1
1399	36.3002	31.25	95.1	7.4e-21	5	208	124	31250	573	559	cydC	356	248	6GJQ_A	56
1400	39.7906	27.193	99.4	1.54e-20	2	228	163	27193	573	564	cydC	339	1502	EAW96457.1	1276
1401	39.6161	26.432	88.2	6.23e-17	6	227	157	26432	573	573	cydC	356	877	EAW96457.1	652
1402	39.7906	27.193	99.4	1.57e-20	2	228	163	27193	573	564	cydC	339	1437	EAW96454.1	1211
1403	39.6161	26.432	87.8	6.2e-17	6	227	157	26432	573	573	cydC	356	812	EAW96454.1	587
1404	90.5759	23.699	99	1.65e-20	18	519	321	23699	573	555	cydC	100	916	BAD92321.1	410
1405	39.7906	27.193	99.4	1.77e-20	2	228	163	27193	573	564	cydC	339	1525	XP_006719088.1	1299
1406	38.0454	25.688	85.5	3.77e-16	5	218	147	25688	573	568	cydC	356	895	XP_006719088.1	688
1407	39.7906	27.193	99.4	1.84e-20	2	228	163	27193	573	564	cydC	339	1538	NP_005682.2	1312
1408	38.7435	26.577	87.8	6.72e-17	6	222	153	26577	573	568	cydC	356	908	NP_005682.2	688
1409	39.7906	27.193	99	2.08e-20	2	228	163	27193	573	564	cydC	339	1473	EAW96455.1	1247
1410	39.6161	26.432	87.8	7.18e-17	6	227	157	26432	573	573	cydC	356	848	EAW96455.1	623
1411	39.267	29.333	92	4.46e-20	5	225	140	29333	573	559	cydC	339	216	2PZE_A	7
1412	36.1257	28.502	94	6.54e-20	3	207	143	28502	573	571	cydC	370	316	ALQ33805.1	110
1413	39.7906	26.754	97.4	7.13e-20	2	228	164	26754	573	564	cydC	339	1538	AAC16057.1	1312
1414	39.6161	26.432	88.2	5.27e-17	6	227	157	26432	573	573	cydC	356	913	AAC16057.1	688
1415	39.267	29.333	91.7	8.39e-20	5	225	140	29333	573	559	cydC	339	228	2PZG_A	19
1416	27.7487	33.333	93.2	8.49e-20	2	159	102	33333	573	510	cydC	355	282	EAW98355.1	125
1417	92.1466	23.295	96.7	1.32e-19	18	528	322	23295	573	555	cydC	100	912	EAW68436.1	396
1418	39.267	29.333	90.5	1.8e-19	5	225	139	29333	573	559	cydC	339	215	2PZF_A	7
1419	92.1466	23.295	95.9	1.93e-19	18	528	322	23295	573	555	cydC	100	912	AAB02278.1	396
1420	41.3613	28.27	93.2	1.42e-18	3	237	163	28270	573	567	cydC	335	1573	AAB02278.1	1340
1421	92.1466	23.295	95.9	2.35e-19	18	528	322	23295	573	555	cydC	100	912	NP_000343.2	396
1422	41.3613	28.27	92	3.01e-18	3	237	163	28270	573	567	cydC	335	1573	NP_000343.2	1340
1423	92.1466	23.295	95.5	2.42e-19	18	528	322	23295	573	555	cydC	100	911	NP_001338226.1	395
1424	41.3613	28.27	92	3.19e-18	3	237	163	28270	573	567	cydC	335	1572	NP_001338226.1	1339
1425	92.1466	23.295	95.5	2.42e-19	18	528	322	23295	573	555	cydC	100	912	EAW68437.1	396
1426	41.3613	28.27	93.2	1.59e-18	3	237	163	28270	573	567	cydC	335	1580	EAW68437.1	1347
1427	92.1466	23.295	95.5	2.48e-19	18	528	322	23295	573	555	cydC	100	912	AAB36699.1	396
1428	41.3613	27.426	87.8	6.82e-17	3	237	165	27426	573	567	cydC	335	1573	AAB36699.1	1340
1429	92.1466	23.295	95.5	2.55e-19	18	528	322	23295	573	555	cydC	100	912	AAC36724.1	396
1430	41.3613	28.27	93.2	1.58e-18	3	237	163	28270	573	567	cydC	335	1573	AAC36724.1	1340
1431	92.3211	23.251	95.5	2.55e-19	18	529	322	23251	573	555	cydC	100	913	AAB02418.1	396
1432	41.3613	28.27	93.2	1.56e-18	3	237	163	28270	573	567	cydC	335	1574	AAB02418.1	1341
1433	92.3211	23.251	95.1	3.22e-19	18	529	322	23251	573	555	cydC	100	912	NP_001338225.1	395
1434	41.3613	28.27	92	3.19e-18	3	237	163	28270	573	567	cydC	335	1573	NP_001338225.1	1340
1435	92.3211	23.251	95.1	3.61e-19	18	529	322	23251	573	555	cydC	100	913	NP_001274103.1	396
1436	41.3613	28.27	92	3.22e-18	3	237	163	28270	573	567	cydC	335	1574	NP_001274103.1	1341
1437	27.9232	33.125	93.2	3.71e-19	2	160	103	33125	573	510	cydC	354	397	BAG51360.1	239
1438	33.5079	36.979	89.4	3.74e-19	3	192	115	36979	573	559	cydC	371	190	CAB59263.1	2
1439	27.9232	33.125	92.8	4.03e-19	2	160	103	33125	573	510	cydC	354	397	XP_024304677.1	239
1440	41.1867	27.966	89.7	4.44e-19	4	236	151	27966	573	564	cydC	334	224	6BZS_A	3
1441	40.8377	33.761	93.6	7.32e-19	9	234	131	33761	573	560	cydC	343	281	5DO7_A	56
1442	40.8377	33.761	93.2	9.28e-19	9	234	131	33761	573	560	cydC	343	281	NP_071881.1	56
1443	40.8377	33.761	90.5	9.83e-19	9	234	131	33761	573	560	cydC	343	281	XP_006712137.1	56
1444	40.8377	33.761	92.8	1.09e-18	9	234	131	33761	573	560	cydC	343	281	XP_011531326.1	56
1445	40.8377	33.761	92.8	1.1e-18	9	234	131	33761	573	560	cydC	343	281	XP_006712136.1	56
1446	27.7487	33.333	92	1.14e-18	2	159	102	33333	573	510	cydC	355	424	CAD38811.1	267
1447	40.8377	33.761	92.4	1.15e-18	9	234	131	33761	573	560	cydC	343	281	XP_005264537.1	56
1448	19.7208	41.593	85.1	1.16e-18	1	113	63	41593	573	572	cydC	463	118	EAW70705.1	6
1449	40.8377	33.761	92.4	1.19e-18	9	234	131	33761	573	560	cydC	343	281	AAY24010.1	56
1450	41.3613	28.27	91.3	1.28e-18	3	237	163	28270	573	567	cydC	335	387	AAA99227.1	154
1451	19.7208	41.593	86.3	1.29e-18	1	113	63	41593	573	572	cydC	463	148	EAW70697.1	36
1452	36.3002	30.769	89.4	1.45e-18	5	208	124	30769	573	559	cydC	356	245	2BBT_A	54
1453	40.8377	33.761	91.3	1.86e-18	9	234	131	33761	573	560	cydC	343	281	EAX00288.1	56
1454	36.3002	30.769	89	2e-18	5	208	124	30769	573	559	cydC	356	245	2BBS_A	54
1455	27.2251	33.974	91.7	2.16e-18	2	156	99	33974	573	510	cydC	358	572	EAW98361.1	418
1456	41.8848	28.333	92.4	2.41e-18	7	240	153	28333	573	555	cydC	334	934	NP_001338224.1	696
1457	41.3613	28.27	92	3.44e-18	3	237	163	28270	573	567	cydC	335	1595	NP_001338224.1	1362
1458	36.1257	29.952	88.6	2.5e-18	4	207	128	29952	573	559	cydC	356	246	1XMI_A	54
1459	42.0593	28.216	92.4	2.57e-18	7	241	153	28216	573	555	cydC	334	935	XP_016873690.1	696
1461	42.0593	28.216	92	3.41e-18	7	241	153	28216	573	555	cydC	334	935	XP_016873686.1	696
1462	41.3613	28.27	92	3.75e-18	3	237	163	28270	573	567	cydC	335	1596	XP_016873686.1	1363
1463	42.0593	28.216	92	3.47e-18	7	241	153	28216	573	555	cydC	334	934	XP_016873688.1	695
1464	41.3613	28.27	92	3.85e-18	3	237	163	28270	573	567	cydC	335	1595	XP_016873688.1	1362
1465	83.7696	24.375	90.9	5.27e-18	12	480	326	24375	573	564	cydC	99	803	AAC15785.1	347
1466	83.5951	24.426	90.9	5.34e-18	12	479	325	24426	573	564	cydC	100	845	XP_011520784.1	390
1467	40.4887	28.017	89.4	5.84e-18	4	232	148	28017	573	564	cydC	338	365	EAW53952.1	148
1468	40.4887	28.017	90.9	7.81e-18	4	232	148	28017	573	564	cydC	338	845	XP_016878703.1	628
1469	36.4747	30.622	90.9	8.32e-18	5	209	126	30622	573	559	cydC	355	633	EAW83529.1	440
1470	42.0593	28.216	90.5	8.88e-18	7	241	153	28216	573	555	cydC	334	368	XP_024304436.1	129
1471	41.3613	28.27	90.1	1.3e-17	3	237	163	28270	573	567	cydC	335	1029	XP_024304436.1	796
1472	42.0593	28.216	90.5	9.99e-18	7	241	153	28216	573	555	cydC	334	434	XP_016873691.1	195
1473	41.3613	28.27	89.7	1.5e-17	3	237	163	28270	573	567	cydC	335	1095	XP_016873691.1	862
1474	36.3002	30.769	90.1	1.15e-17	5	208	125	30769	573	559	cydC	356	633	AAB46352.1	441
1475	36.3002	30.769	90.1	1.31e-17	5	208	125	30769	573	559	cydC	356	633	ABD72215.1	441
1476	41.3613	28.27	89.7	1.51e-17	3	237	163	28270	573	567	cydC	335	892	XP_016873693.1	659
1477	39.7906	28.947	89.4	1.66e-17	7	228	143	28947	573	555	cydC	346	231	XP_016873693.1	5
1478	36.3002	29.808	84.3	6.72e-17	5	208	127	29808	573	559	cydC	356	246	2BBO_A	54
1479	49.0401	27.402	87.8	6.87e-17	8	281	185	27402	573	568	cydC	298	709	XP_024306451.1	438
1480	32.2862	33.514	87.8	7.32e-17	5	185	112	33514	573	533	cydC	353	1120	BAE06122.2	943
1481	41.5358	27.731	65.9	5.5e-10	7	238	153	27731	573	567	cydC	339	2165	BAE06122.2	1938
1482	49.0401	27.402	87.8	8.06e-17	8	281	185	27402	573	568	cydC	298	709	AAI25233.1	438
1483	32.4607	26.882	66.2	3.35e-10	4	186	123	26882	573	533	cydC	351	1473	AAI25233.1	1298
1484	49.0401	27.402	87	1.13e-16	8	281	185	27402	573	568	cydC	298	709	AAK30023.1	438
1485	38.5689	25.339	67.4	1.7e-10	5	221	151	25339	573	567	cydC	351	1508	AAK30023.1	1298
1486	49.0401	27.402	87	1.15e-16	8	281	185	27402	573	568	cydC	298	709	NP_525023.2	438
1487	38.5689	25.339	67	2.19e-10	5	221	151	25339	573	567	cydC	351	1508	NP_525023.2	1298
1488	49.0401	27.402	87	1.15e-16	8	281	185	27402	573	568	cydC	298	709	AAM77557.1	438
1489	38.5689	25.339	67	2.17e-10	5	221	151	25339	573	567	cydC	351	1508	AAM77557.1	1298
1490	49.0401	27.402	87	1.17e-16	8	281	185	27402	573	568	cydC	298	709	EAW89075.1	438
1491	38.5689	25.339	67	2.25e-10	5	221	151	25339	573	567	cydC	351	1508	EAW89075.1	1298
1492	41.7103	28.033	86.3	1.49e-16	8	239	149	28033	573	560	cydC	337	305	NP_058198.2	75
1493	49.0401	27.402	86.7	1.6e-16	8	281	185	27402	573	568	cydC	298	514	XP_016879895.1	243
1494	38.5689	25.339	66.6	3.12e-10	5	221	151	25339	573	567	cydC	351	1313	XP_016879895.1	1103
1495	41.7103	28.033	85.9	1.7e-16	8	239	149	28033	573	560	cydC	337	305	NP_004906.3	75
1496	41.7103	28.033	85.9	1.73e-16	8	239	149	28033	573	560	cydC	337	305	BAF84841.1	75
1497	41.7103	28.033	85.9	1.79e-16	8	239	149	28033	573	560	cydC	337	265	G02068	35
1498	41.7103	28.033	85.9	1.79e-16	8	239	149	28033	573	560	cydC	337	301	AAK28841.1	71
1499	33.3333	33.508	86.7	1.88e-16	6	191	115	33508	573	555	cydC	370	1143	AAC51144.1	960
1501	41.7103	28.033	85.9	2.01e-16	8	239	149	28033	573	560	cydC	337	301	BAA95530.1	71
1502	41.7103	28.033	85.9	2.03e-16	8	239	149	28033	573	560	cydC	337	301	AAK28837.1	71
1503	41.7103	28.033	85.9	2.08e-16	8	239	149	28033	573	560	cydC	337	301	CAA62631.1	71
1504	41.7103	28.033	85.5	2.12e-16	8	239	149	28033	573	560	cydC	337	283	NP_997511.1	53
1505	36.3002	29.808	82.8	2.13e-16	5	208	126	29808	573	559	cydC	356	245	1XMJ_A	54
1506	31.9372	33.333	86.3	2.22e-16	5	183	111	33333	573	533	cydC	355	1120	EAW73057.1	945
1507	29.3194	35.714	86.3	2.26e-16	5	168	97	35714	573	533	cydC	370	1120	CAA75729.1	960
1509	41.7103	28.033	85.5	2.28e-16	8	239	149	28033	573	560	cydC	337	302	NP_997512.1	72
1510	29.3194	35.714	86.3	2.3e-16	5	168	97	35714	573	533	cydC	370	1120	EAW73058.1	960
1511	35.2531	29.703	66.2	3.55e-10	6	202	124	29703	573	532	cydC	339	2129	EAW73058.1	1938
1512	41.7103	28.033	85.5	2.37e-16	8	239	149	28033	573	560	cydC	337	283	AAK28839.1	53
1513	29.3194	35.714	86.3	2.42e-16	5	168	97	35714	573	533	cydC	370	1120	NP_000341.2	960
1514	41.5358	27.731	65.9	5.45e-10	7	238	153	27731	573	567	cydC	339	2165	NP_000341.2	1938
1515	29.3194	35.714	86.3	2.46e-16	5	168	97	35714	573	533	cydC	370	1120	AAC23915.1	960
1516	41.5358	27.731	65.5	6.58e-10	7	238	153	27731	573	567	cydC	339	2165	AAC23915.1	1938
1517	29.3194	35.714	86.3	2.48e-16	5	168	97	35714	573	533	cydC	370	1120	AAC05632.1	960
1518	41.5358	27.731	65.9	5.5e-10	7	238	153	27731	573	567	cydC	339	2165	AAC05632.1	1938
1519	41.7103	28.033	85.5	2.53e-16	8	239	149	28033	573	560	cydC	337	307	NP_997510.1	77
1520	41.7103	28.033	85.5	2.55e-16	8	239	149	28033	573	560	cydC	337	302	AAK28840.1	72
1521	41.7103	28.033	85.5	2.64e-16	8	239	149	28033	573	560	cydC	337	307	AAK28838.1	77
1522	41.7103	28.033	85.5	2.67e-16	8	239	149	28033	573	560	cydC	337	316	BAG60699.1	86
1523	49.0401	27.402	85.9	2.69e-16	8	281	185	27402	573	568	cydC	298	392	XP_011522876.1	121
1524	37.8709	25.806	66.2	3.92e-10	5	217	147	25806	573	567	cydC	355	1191	XP_011522876.1	985
1525	41.7103	28.033	85.5	2.7e-16	8	239	149	28033	573	560	cydC	337	316	NP_997057.1	86
1526	41.7103	28.033	85.5	2.77e-16	8	239	149	28033	573	560	cydC	337	316	XP_011528108.1	86
1527	41.7103	28.033	85.5	2.77e-16	8	239	149	28033	573	560	cydC	337	316	AAK28842.1	86
1528	34.0314	32.308	85.9	3.25e-16	2	195	129	32308	573	533	cydC	339	998	XP_024307088.1	807
1529	39.7906	28.947	67.4	1.86e-10	6	228	153	28947	573	562	cydC	339	1935	XP_024307088.1	1713
1530	41.7103	28.033	85.1	3.28e-16	8	239	149	28033	573	560	cydC	337	305	EAX09575.1	75
1531	41.7103	28.033	85.1	3.37e-16	8	239	149	28033	573	560	cydC	337	305	EAX09574.1	75
1532	34.0314	32.308	85.5	3.74e-16	2	195	129	32308	573	533	cydC	339	998	XP_024307091.1	807
1533	35.0785	31.343	68.2	9e-11	5	201	130	31343	573	536	cydC	339	1993	XP_024307091.1	1798
1534	34.0314	32.308	85.5	3.83e-16	2	195	129	32308	573	533	cydC	339	998	AAF85794.1	807
1535	39.7906	28.947	67	2.32e-10	6	228	153	28947	573	562	cydC	339	2015	AAF85794.1	1793
1536	35.7766	30.732	85.5	3.94e-16	5	205	124	30732	573	560	cydC	361	878	XP_016866942.1	687
1537	34.0314	32.308	85.5	3.94e-16	2	195	129	32308	573	533	cydC	339	846	XP_024307090.1	655
1538	39.7906	28.947	67	2.16e-10	6	228	153	28947	573	562	cydC	339	1868	XP_024307090.1	1646
1539	34.0314	32.308	85.5	3.98e-16	2	195	129	32308	573	533	cydC	339	860	BAB62294.1	669
1540	39.7906	28.947	67	2.28e-10	6	228	153	28947	573	562	cydC	339	1877	BAB62294.1	1655
1541	34.0314	32.308	85.5	3.99e-16	2	195	129	32308	573	533	cydC	339	998	XP_006722679.1	807
1542	39.7906	28.947	67	2.39e-10	6	228	153	28947	573	562	cydC	339	1997	XP_006722679.1	1775
1543	34.0314	32.308	85.5	4e-16	2	195	129	32308	573	533	cydC	339	998	XP_011525935.1	807
1544	34.0314	32.308	85.5	4.06e-16	2	195	129	32308	573	533	cydC	339	998	AAN04657.1	807
1545	39.7906	28.947	67	2.4e-10	6	228	153	28947	573	562	cydC	339	2015	AAN04657.1	1793
1546	34.0314	32.308	85.5	4.11e-16	2	195	129	32308	573	533	cydC	339	998	XP_006722680.1	807
1547	34.0314	32.308	85.5	4.17e-16	2	195	129	32308	573	533	cydC	339	998	AAK00959.1	807
1548	39.7906	28.947	67	2.36e-10	6	228	153	28947	573	562	cydC	339	2015	AAK00959.1	1793
1549	34.0314	32.308	85.5	4.2e-16	2	195	129	32308	573	533	cydC	339	998	XP_024307086.1	807
1550	39.7906	28.947	67	2.57e-10	6	228	153	28947	573	562	cydC	339	2002	XP_024307086.1	1780
1551	34.0314	32.308	85.5	4.21e-16	2	195	129	32308	573	533	cydC	339	998	XP_024307083.1	807
1552	39.7906	28.947	67	2.4e-10	6	228	153	28947	573	562	cydC	339	2020	XP_024307083.1	1798
1553	34.0314	32.308	85.5	4.24e-16	2	195	129	32308	573	533	cydC	339	998	NP_061985.2	807
1554	39.7906	28.947	67	2.36e-10	6	228	153	28947	573	562	cydC	339	2015	NP_061985.2	1793
1555	35.6021	30.882	85.1	5.12e-16	5	204	125	30882	573	560	cydC	361	878	XP_016866940.1	687
1556	36.8237	30.806	69.3	4.24e-11	5	211	134	30806	573	477	cydC	272	1446	XP_016866940.1	1243
1557	34.0314	32.308	85.1	5.34e-16	2	195	129	32308	573	533	cydC	339	998	XP_024307087.1	807
1558	39.7906	28.947	66.6	2.86e-10	6	228	153	28947	573	562	cydC	339	1977	XP_024307087.1	1755
1559	35.7766	30.732	84.7	5.93e-16	5	205	124	30732	573	560	cydC	361	878	XP_016866937.1	687
1560	39.7906	34.649	75.5	5.38e-13	5	228	139	34649	573	493	cydC	272	1466	XP_016866937.1	1243
1561	34.0314	32.308	84.7	6.12e-16	2	195	129	32308	573	533	cydC	339	998	XP_011525936.1	807
1562	35.7766	30.732	84.7	6.35e-16	5	205	124	30732	573	560	cydC	361	878	XP_016866939.1	687
1563	36.8237	30.806	68.6	6.27e-11	5	211	134	30806	573	477	cydC	272	1446	XP_016866939.1	1243
1564	34.904	29	84.7	6.35e-16	4	200	136	29000	573	533	cydC	336	1031	AAD49849.1	836
1565	42.9319	26.016	65.1	9.16e-10	8	246	147	26016	573	567	cydC	339	2079	AAD49849.1	1852
1566	34.904	29	84.7	6.38e-16	4	200	136	29000	573	533	cydC	336	1091	AAF86276.1	896
1567	42.9319	26.016	65.1	8.29e-10	8	246	147	26016	573	567	cydC	339	2139	AAF86276.1	1912
1568	34.904	29	84.7	6.4e-16	4	200	136	29000	573	533	cydC	336	1112	5XJY_A	917
1569	42.9319	26.016	65.5	7e-10	8	246	147	26016	573	567	cydC	339	2160	5XJY_A	1933
1570	34.904	29	84.7	6.43e-16	4	200	136	29000	573	533	cydC	336	1091	EAW58994.1	896
1571	42.9319	26.016	65.5	6.99e-10	8	246	147	26016	573	567	cydC	339	2139	EAW58994.1	1912
1572	34.904	29	84.7	6.49e-16	4	200	136	29000	573	533	cydC	336	1091	NP_005493.2	896
1573	42.9319	26.016	65.5	6.99e-10	8	246	147	26016	573	567	cydC	339	2139	NP_005493.2	1912
1574	34.904	29	84.7	6.49e-16	4	200	136	29000	573	533	cydC	336	1091	AAI46857.1	896
1575	42.9319	26.016	65.5	6.99e-10	8	246	147	26016	573	567	cydC	339	2139	AAI46857.1	1912
1576	34.904	29	84.7	6.49e-16	4	200	136	29000	573	533	cydC	336	1091	AAF98175.1	896
1577	42.9319	26.016	65.5	6.99e-10	8	246	147	26016	573	567	cydC	339	2139	AAF98175.1	1912
1578	34.904	29	84.7	6.67e-16	4	200	136	29000	573	533	cydC	336	1116	XP_011516643.1	921
1579	42.9319	26.016	65.5	7.24e-10	8	246	147	26016	573	567	cydC	339	2164	XP_011516643.1	1937
1580	34.0314	32.308	84.7	6.68e-16	2	195	129	32308	573	533	cydC	339	998	XP_024307089.1	807
1581	39.7906	28.947	66.2	3.46e-10	6	228	153	28947	573	562	cydC	339	1871	XP_024307089.1	1649
1582	34.904	29	84.7	6.75e-16	4	200	136	29000	573	533	cydC	336	1031	XP_005251833.1	836
1583	42.9319	26.016	65.5	7.52e-10	8	246	147	26016	573	567	cydC	339	2081	XP_005251833.1	1854
1584	34.904	29	84.7	6.77e-16	4	200	136	29000	573	533	cydC	336	1070	XP_016869871.1	875
1585	42.9319	26.016	65.5	7.54e-10	8	246	147	26016	573	567	cydC	339	2120	XP_016869871.1	1893
1586	34.904	29	84.7	6.78e-16	4	200	136	29000	573	533	cydC	336	1091	BAH10664.1	896
1587	42.9319	26.016	65.5	7.55e-10	8	246	147	26016	573	567	cydC	339	2139	BAH10664.1	1912
1588	34.904	29	84.7	7.07e-16	4	200	136	29000	573	533	cydC	336	970	XP_011516644.1	775
1589	42.9319	26.016	65.1	7.89e-10	8	246	147	26016	573	567	cydC	339	2020	XP_011516644.1	1793
1590	41.7103	28.033	84	7.84e-16	8	239	149	28033	573	560	cydC	337	316	XP_011528109.1	86
1591	50.9599	24.315	84.3	8e-16	7	292	194	24315	573	562	cydC	279	489	EAX10058.1	217
1593	34.0314	31.795	84	1.25e-15	2	195	129	31795	573	533	cydC	339	859	EAW69558.1	669
1594	39.7906	28.947	67	2.54e-10	6	228	153	28947	573	562	cydC	339	1876	EAW69558.1	1654
1595	34.0314	31.795	84	1.25e-15	2	195	129	31795	573	533	cydC	339	997	EAW69556.1	807
1596	39.7906	28.947	67	2.42e-10	6	228	153	28947	573	562	cydC	339	2014	EAW69556.1	1792
1597	34.904	28.5	83.2	2.23e-15	4	200	137	28500	573	533	cydC	336	1091	AAK43526.1	896
1598	42.9319	26.016	65.5	6.87e-10	8	246	147	26016	573	567	cydC	339	2139	AAK43526.1	1912
1599	39.7906	29.825	82.8	2.73e-15	7	228	147	29825	573	531	cydC	312	673	NP_001275914.1	451
1601	32.4607	33.333	82.8	2.82e-15	2	186	121	33333	573	533	cydC	348	217	XP_024307092.1	35
1602	39.7906	28.947	66.6	2.72e-10	6	228	153	28947	573	562	cydC	339	1239	XP_024307092.1	1017
1603	39.7906	29.825	82.8	2.85e-15	7	228	147	29825	573	531	cydC	312	612	XP_005256997.1	390
1605	39.7906	29.825	82.8	2.85e-15	7	228	147	29825	573	531	cydC	312	673	NP_001275915.1	451
1607	39.6161	29.956	82.4	2.94e-15	7	227	146	29956	573	530	cydC	312	672	BAG65201.1	451
1608	39.7906	29.825	82.8	3.05e-15	7	228	147	29825	573	531	cydC	312	673	AAI30281.1	451
1610	39.6161	29.956	82	4.05e-15	7	227	146	29956	573	530	cydC	312	672	BAG58673.1	451
1611	39.6161	29.956	82	4.1e-15	7	227	146	29956	573	530	cydC	312	672	XP_011522494.1	451
1612	38.918	26.457	80.5	4.84e-15	6	223	152	26457	573	554	cydC	336	360	CAE45856.1	146
1613	38.2199	28.767	81.3	6.18e-15	7	219	140	28767	573	560	cydC	350	413	XP_024307909.1	203
1614	34.904	32	81.6	6.36e-15	3	200	125	32000	573	533	cydC	339	1000	EAW69557.1	807
1616	38.2199	28.767	81.3	6.8e-15	7	219	140	28767	573	560	cydC	350	412	AAL06598.1	202
1617	37.5218	27.442	81.3	7.05e-15	6	215	144	27442	573	554	cydC	344	315	EAW89080.1	109
1618	36.3002	34.135	80.5	8.14e-15	9	208	113	34135	573	560	cydC	369	200	XP_011531327.1	1
1619	34.904	29	80.1	9.6e-15	4	200	136	29000	573	533	cydC	336	265	BAC85435.1	70
1620	34.904	29	81.3	9.71e-15	4	200	136	29000	573	533	cydC	336	1091	XP_005251830.1	896
1621	42.9319	26.016	68.2	1.02e-10	8	246	147	26016	573	567	cydC	339	2141	XP_005251830.1	1914
1622	34.904	32	80.9	1.09e-14	3	200	125	32000	573	533	cydC	339	1000	EAW69562.1	807
1623	34.904	29	80.9	1.11e-14	4	200	136	29000	573	533	cydC	336	1116	XP_011516641.1	921
1624	42.9319	26.016	67.8	1.18e-10	8	246	147	26016	573	567	cydC	339	2166	XP_011516641.1	1939
1625	37.5218	27.442	80.9	1.12e-14	6	215	144	27442	573	554	cydC	344	689	EAW89081.1	483
1626	37.5218	27.442	80.9	1.16e-14	6	215	144	27442	573	554	cydC	344	689	EAW89083.1	483
1627	39.7906	29.386	80.5	1.16e-14	7	228	148	29386	573	531	cydC	312	612	BAG65144.1	390
1628	35.7766	28.78	79.7	1.44e-14	6	205	125	28780	573	560	cydC	370	274	AAO14617.1	77
1629	35.7766	28.78	79.7	1.45e-14	6	205	125	28780	573	560	cydC	370	274	AAY40902.1	77
1630	34.904	29	80.5	1.58e-14	4	200	136	29000	573	533	cydC	336	1116	XP_011516646.1	921
1631	35.7766	28.78	79.7	1.59e-14	6	205	125	28780	573	560	cydC	370	283	5NJ3_A	86
1632	37.5218	27.442	80.1	1.59e-14	6	215	144	27442	573	554	cydC	344	689	BAF85281.1	483
1633	35.7766	28.78	79.7	1.59e-14	6	205	125	28780	573	560	cydC	370	274	NP_004818.2	77
1634	35.7766	28.78	79.7	1.64e-14	6	205	125	28780	573	560	cydC	370	274	AAC97367.1	77
1635	35.7766	28.78	79.7	1.64e-14	6	205	125	28780	573	560	cydC	370	274	AAG52982.1	77
1636	35.7766	28.78	79.7	1.77e-14	6	205	125	28780	573	560	cydC	370	274	AAQ92941.1	77
1637	35.7766	28.78	79.7	1.83e-14	6	205	125	28780	573	560	cydC	370	274	NP_001335916.1	77
1638	38.3944	28.182	80.1	2e-14	8	220	136	28182	573	554	cydC	344	689	CAB93535.3	483
1639	44.8517	24.903	72	6.11e-12	7	257	174	24903	573	567	cydC	318	1528	CAB93535.3	1284
1640	38.3944	28.182	80.1	2e-14	8	220	136	28182	573	554	cydC	344	689	NP_061142.2	483
1641	44.8517	24.125	71.2	1.17e-11	7	257	176	24125	573	567	cydC	318	1528	NP_061142.2	1284
1642	38.3944	28.182	80.1	2.09e-14	8	220	136	28182	573	554	cydC	344	689	AAK30022.1	483
1643	44.8517	24.125	71.2	1.19e-11	7	257	176	24125	573	567	cydC	318	1528	AAK30022.1	1284
1644	35.7766	28.78	79.3	2.25e-14	6	205	125	28780	573	560	cydC	370	274	AAH92408.1	77
1645	35.7766	28.78	79	2.5e-14	6	205	125	28780	573	560	cydC	370	274	NP_001244315.1	77
1646	41.1867	27.119	79.3	3.6e-14	6	236	144	27119	573	568	cydC	346	759	AAC50967.1	539
1648	79.2321	23.789	79.3	3.66e-14	16	454	281	23789	573	568	cydC	141	759	AAI51841.1	345
1650	41.1867	27.119	79	3.89e-14	6	236	144	27119	573	568	cydC	346	759	NP_001080.2	539
1652	35.9511	27.184	78.6	4.07e-14	5	206	140	27184	573	554	cydC	351	689	CAD54757.1	492
1653	20.0698	32.174	73.2	4.26e-14	2	115	60	32174	573	434	cydC	338	134	AAR99172.1	20
1654	41.1867	27.119	79	4.35e-14	6	236	144	27119	573	568	cydC	346	763	BAE06126.1	543
1656	35.7766	28.293	78.2	4.6e-14	6	205	126	28293	573	560	cydC	370	283	6HCO_A	86
1657	35.7766	28.293	78.2	4.62e-14	6	205	126	28293	573	560	cydC	370	274	6HBU_A	77
1658	35.7766	28.78	78.2	5.41e-14	6	205	125	28780	573	560	cydC	370	274	AAD09188.1	77
1659	31.7627	28.571	76.3	1e-13	6	182	117	28571	573	395	cydC	220	406	AAD05023.1	232
1660	41.8848	24.583	77.4	1.19e-13	6	240	161	24583	573	530	cydC	301	681	XP_024306299.1	452
1661	41.8848	24.583	77.4	1.23e-13	6	240	161	24583	573	530	cydC	301	673	EAW89073.1	444
1663	41.8848	24.583	77	1.65e-13	6	240	161	24583	573	530	cydC	301	656	CAH10479.1	427
1664	41.8848	24.583	76.6	2.01e-13	6	240	161	24583	573	530	cydC	301	673	BAB71359.1	444
1665	42.0593	24.481	76.6	2.06e-13	6	241	162	24481	573	531	cydC	301	524	XP_016879504.1	294
1667	42.0593	24.481	76.6	2.12e-13	6	241	162	24481	573	531	cydC	301	682	XP_016879500.1	452
1669	42.0593	24.481	76.6	2.16e-13	6	241	162	24481	573	531	cydC	301	682	XP_024306297.1	452
1671	42.0593	24.481	76.6	2.33e-13	6	241	162	24481	573	531	cydC	301	674	EAW89074.1	444
1673	42.0593	24.481	76.6	2.35e-13	6	241	162	24481	573	531	cydC	301	674	XP_016879501.1	444
1675	34.3805	29.442	76.6	2.36e-13	5	197	133	29442	573	533	cydC	339	4001	EAW60990.1	3809
1677	34.3805	29.442	76.6	2.36e-13	5	197	133	29442	573	533	cydC	339	4034	XP_011513434.1	3842
1679	34.3805	29.442	76.6	2.36e-13	5	197	133	29442	573	533	cydC	339	4034	XP_011513433.1	3842
1681	34.3805	29.442	76.6	2.36e-13	5	197	133	29442	573	533	cydC	339	4034	Q86UQ4.3	3842
1683	34.3805	29.442	76.6	2.36e-13	5	197	133	29442	573	533	cydC	339	4034	NP_689914.3	3842
1685	34.3805	29.442	76.6	2.36e-13	5	197	133	29442	573	533	cydC	339	4034	XP_011513432.1	3842
1687	34.3805	29.442	76.6	2.38e-13	5	197	133	29442	573	533	cydC	339	4034	AAP13576.1	3842
1689	34.3805	29.442	76.6	2.47e-13	5	197	133	29442	573	533	cydC	339	3996	EAW60991.1	3804
1690	88.2653	25.434	168	3.03e-44	6	519	371	25434	588	582	cydD	69	574	4A82_A	67
1691	85.2041	26.347	151	4.17e-38	8	501	350	26347	588	581	cydD	89	598	5OCH_H	109
1692	85.2041	26.347	151	5e-38	8	501	350	26347	588	581	cydD	89	598	5OCH_F	109
1693	85.2041	26.347	151	5.77e-38	8	501	350	26347	588	581	cydD	89	598	5OCH_E	109
1694	84.3537	26.008	153	6.37e-38	7	496	354	26008	588	581	cydD	90	626	AAA59575.1	140
1695	76.1905	27.009	137	6.91e-33	11	448	285	27009	588	582	cydD	155	1272	AAA59575.1	847
1696	90.9864	26.168	150	6.45e-38	10	535	368	26168	588	581	cydD	55	520	EAW54061.1	5
1697	85.2041	26.347	151	6.53e-38	8	501	350	26347	588	581	cydD	89	598	5OCH_A	109
1698	84.3537	26.008	152	9.77e-38	7	496	354	26008	588	581	cydD	90	626	BAF82848.1	140
1699	76.1905	27.009	138	4.24e-33	11	448	285	27009	588	582	cydD	155	1272	BAF82848.1	847
1700	84.3537	26.008	152	9.86e-38	7	496	354	26008	588	581	cydD	90	626	NP_000918.2	140
1701	76.1905	27.009	138	4.48e-33	11	448	285	27009	588	582	cydD	155	1272	NP_000918.2	847
1702	85.2041	26.347	150	1.09e-37	8	501	350	26347	588	581	cydD	89	609	EAW54064.1	120
1703	84.3537	26.008	152	1.14e-37	7	496	354	26008	588	581	cydD	90	626	6QEX_A	140
1704	76.1905	27.009	137	6.85e-33	11	448	285	27009	588	582	cydD	155	1272	6QEX_A	847
1705	84.3537	26.008	152	1.15e-37	7	496	354	26008	588	581	cydD	90	696	NP_001335874.1	210
1706	76.1905	27.009	138	5.78e-33	11	448	285	27009	588	582	cydD	155	1342	NP_001335874.1	917
1707	85.2041	26.347	150	1.2e-37	8	501	350	26347	588	581	cydD	89	598	5OCH_B	109
1708	84.3537	26.008	152	1.25e-37	7	496	354	26008	588	581	cydD	90	626	AAI30425.1	140
1709	76.1905	27.009	138	5.98e-33	11	448	285	27009	588	582	cydD	155	1272	AAI30425.1	847
1710	85.2041	26.347	150	1.92e-37	8	501	350	26347	588	581	cydD	89	602	NP_001269222.1	113
1711	84.3537	25.806	151	2.78e-37	7	496	355	25806	588	581	cydD	90	626	6C0V_A	140
1712	76.1905	26.786	137	1.19e-32	11	448	286	26786	588	582	cydD	155	1272	6C0V_A	847
1713	85.2041	26.347	150	2.81e-37	8	501	350	26347	588	581	cydD	89	707	NP_001269220.1	218
1714	85.2041	26.347	150	3.11e-37	8	501	350	26347	588	581	cydD	89	690	NP_009119.2	201
1715	85.2041	26.347	149	4.16e-37	8	501	350	26347	588	581	cydD	89	656	EAW54060.1	167
1716	85.2041	26.347	149	4.66e-37	8	501	350	26347	588	581	cydD	89	673	BAC04392.1	184
1717	85.2041	26.347	149	8.29e-37	8	501	350	26347	588	581	cydD	89	690	AAD15748.1	201
1718	84.3537	26.008	149	1.16e-36	8	496	353	26008	588	581	cydD	90	625	AAB69423.1	140
1719	76.1905	27.009	138	6.09e-33	11	448	285	27009	588	582	cydD	155	1271	AAB69423.1	846
1720	40.9864	34.44	141	1.33e-36	2	241	155	34440	588	587	cydD	350	289	AAH43423.1	49
1721	75.8503	28.475	145	1.34e-36	12	446	277	28475	588	581	cydD	154	444	BAC11171.1	23
1722	40.9864	34.44	140	1.71e-36	2	241	155	34440	588	587	cydD	350	294	3NH6_A	54
1723	85.2041	26.148	147	1.87e-36	8	501	351	26148	588	581	cydD	89	707	BAA92038.1	218
1724	84.6939	26.506	148	2.09e-36	9	498	349	26506	588	581	cydD	90	628	EAW76944.1	142
1726	84.6939	26.506	148	2.14e-36	9	498	349	26506	588	581	cydD	90	628	NP_000434.1	142
1727	76.7007	26.386	129	3.7e-30	11	451	284	26386	588	582	cydD	155	1271	NP_000434.1	846
1728	84.3537	26.411	148	2.16e-36	8	496	352	26411	588	581	cydD	90	628	XP_016867812.1	142
1729	77.7211	26.039	122	4.97e-28	12	457	283	26039	588	581	cydD	155	1277	XP_016867812.1	846
1730	84.6939	26.506	148	2.42e-36	9	498	349	26506	588	581	cydD	90	628	NP_061337.1	142
1731	77.8912	25.983	123	4.82e-28	12	458	284	25983	588	582	cydD	155	1278	NP_061337.1	846
1732	84.6939	26.506	148	2.54e-36	9	498	349	26506	588	581	cydD	90	628	NP_061338.1	142
1733	36.9048	33.641	125	7.97e-29	2	217	141	33641	588	582	cydD	369	1224	NP_061338.1	1008
1734	84.6939	26.506	148	2.61e-36	9	498	349	26506	588	581	cydD	90	642	EAW76949.1	156
1735	76.7007	26.386	129	4e-30	11	451	284	26386	588	582	cydD	155	1285	EAW76949.1	860
1736	71.9388	29.314	145	2.64e-36	8	423	280	29314	588	581	cydD	167	485	BAG52795.1	74
1737	84.3537	26.411	148	2.75e-36	8	496	352	26411	588	581	cydD	90	718	XP_011514612.3	232
1738	77.7211	26.039	122	6.11e-28	12	457	283	26039	588	581	cydD	155	1332	XP_011514612.3	901
1739	84.3537	26.411	148	2.99e-36	8	496	352	26411	588	581	cydD	90	718	XP_011514610.3	232
1740	77.7211	26.039	122	8.15e-28	12	457	283	26039	588	581	cydD	155	1367	XP_011514610.3	936
1741	84.3537	26.411	148	3.38e-36	8	496	352	26411	588	581	cydD	90	718	XP_011514613.3	232
1742	37.9252	32.735	117	2.07e-26	3	223	140	32735	588	581	cydD	369	1324	XP_011514613.3	1102
1743	84.3537	26.411	148	3.46e-36	8	496	352	26411	588	581	cydD	90	718	XP_011514614.3	232
1744	37.9252	32.735	117	2.2e-26	3	223	140	32735	588	581	cydD	369	1320	XP_011514614.3	1098
1745	84.3537	26.411	147	3.85e-36	8	496	352	26411	588	581	cydD	90	718	XP_011514611.3	232
1746	76.5306	26.444	128	8.84e-30	11	450	283	26444	588	581	cydD	155	1360	XP_011514611.3	936
1747	84.3537	26.411	147	4.17e-36	8	496	352	26411	588	581	cydD	90	718	XP_011514615.2	232
1748	36.9048	33.641	124	1.74e-28	2	217	141	33641	588	582	cydD	369	1314	XP_011514615.2	1098
1749	84.6939	26.506	147	4.37e-36	9	498	349	26506	588	581	cydD	90	628	AAH42531.1	142
1750	77.8912	25.983	122	5e-28	12	458	284	25983	588	582	cydD	155	1278	AAH42531.1	846
1751	75.8503	28.475	144	5e-36	12	446	277	28475	588	581	cydD	154	520	XP_005253615.1	99
1752	75.8503	28.475	144	5.69e-36	12	446	277	28475	588	581	cydD	154	517	EAW98353.1	96
1753	40.9864	34.44	142	5.79e-36	2	241	155	34440	588	587	cydD	350	424	EAW70699.1	184
1754	72.619	28.103	147	5.87e-36	6	427	295	28103	588	581	cydD	159	562	ACF94688.1	144
1755	76.1905	27.009	137	7.09e-33	11	448	285	27009	588	582	cydD	155	1208	ACF94688.1	783
1756	85.2041	26.347	145	7.67e-36	8	501	350	26347	588	581	cydD	89	602	BAG57613.1	113
1757	83.6735	26.016	146	8.54e-36	7	492	346	26016	588	581	cydD	98	620	AAP55848.1	139
1758	76.5306	26.889	128	9.31e-30	13	450	263	26889	588	570	cydD	153	1240	AAP55848.1	825
1759	84.3537	25.806	146	8.78e-36	7	496	355	25806	588	581	cydD	90	625	6FN4_A	139
1760	38.7755	34.211	129	4.12e-30	3	228	146	34211	588	582	cydD	358	1271	6FN4_A	1045
1761	83.6735	26.016	146	9.1e-36	7	492	346	26016	588	581	cydD	98	620	NP_001157413.1	139
1762	76.5306	26.889	128	9.57e-30	13	450	263	26889	588	570	cydD	153	1240	NP_001157413.1	825
1763	40.9864	34.44	143	1.05e-35	2	241	155	34440	588	587	cydD	350	499	AAC28653.1	259
1764	84.3537	25.806	146	1.17e-35	7	496	355	25806	588	581	cydD	90	595	6FN1_A	109
1765	38.7755	34.211	129	4.49e-30	3	228	146	34211	588	582	cydD	358	1241	6FN1_A	1015
1766	74.6599	27.563	144	2.6e-35	10	439	290	27563	588	581	cydD	154	738	NP_062571.1	317
1767	84.3537	25.605	144	4.08e-35	7	496	356	25605	588	581	cydD	90	625	6QEE_A	139
1768	38.7755	33.333	126	4.92e-29	3	228	148	33333	588	582	cydD	358	1271	6QEE_A	1045
1769	37.415	36.818	144	5.28e-35	2	220	137	36818	588	581	cydD	363	408	XP_011514617.2	190
1770	77.7211	26.039	122	4.7e-28	12	457	283	26039	588	581	cydD	155	1057	XP_011514617.2	626
1771	37.7551	35.586	135	2.23e-34	2	222	140	35586	588	587	cydD	369	290	EAW70696.1	69
1772	41.3265	34.568	139	3.3e-34	3	243	152	34568	588	587	cydD	350	559	BAD18782.1	319
1773	50.8503	32.107	141	3.62e-34	5	299	186	32107	588	587	cydD	299	754	EAW70695.1	463
1774	50.8503	32.107	140	4.01e-34	5	299	186	32107	588	587	cydD	299	754	BAB71347.1	463
1775	50.8503	32.107	141	4.07e-34	5	299	186	32107	588	587	cydD	299	784	NP_001336757.1	493
1776	75.1701	27.376	140	5.67e-34	11	442	290	27376	588	581	cydD	154	741	AAH64384.1	317
1777	50.8503	32.107	140	7.12e-34	5	299	186	32107	588	587	cydD	299	830	NP_005680.1	539
1778	50.8503	32.107	140	9.25e-34	5	299	186	32107	588	587	cydD	299	884	AAG33617.1	593
1779	55.2721	30.769	134	1.13e-33	7	325	210	30769	588	582	cydD	270	354	EAW76940.1	33
1780	70.7483	28.125	139	1.83e-33	6	416	287	28125	588	581	cydD	170	408	BAD92207.1	1
1781	76.1905	27.009	138	5.65e-33	11	448	285	27009	588	582	cydD	155	1054	BAD92207.1	629
1782	55.2721	30.769	134	2.39e-33	7	325	210	30769	588	582	cydD	270	397	EAW76941.1	76
1783	47.1088	32.13	131	4.51e-33	5	277	180	32130	588	582	cydD	312	287	EAW76943.1	13
1784	49.3197	31.034	136	1e-32	3	290	195	31034	588	570	cydD	286	694	BAG50910.1	405
1785	49.3197	31.034	136	1.12e-32	3	290	195	31034	588	570	cydD	286	667	BAG57829.1	378
1786	49.3197	31.034	135	1.74e-32	3	290	195	31034	588	570	cydD	286	667	NP_001258627.1	378
1787	49.3197	31.034	135	2.03e-32	3	290	195	31034	588	570	cydD	286	653	NP_001258626.1	364
1788	49.3197	31.034	135	2.26e-32	3	290	195	31034	588	570	cydD	286	693	BAA28861.1	404
1789	49.3197	31.034	135	2.29e-32	3	290	195	31034	588	570	cydD	286	654	NP_001258628.1	365
1790	49.3197	31.034	135	2.62e-32	3	290	195	31034	588	570	cydD	286	694	NP_004290.2	405
1791	49.3197	31.034	135	2.66e-32	3	290	195	31034	588	570	cydD	286	693	NP_001258625.1	404
1792	49.3197	31.034	135	3.63e-32	3	290	195	31034	588	570	cydD	286	693	AAC39865.1	404
1793	49.3197	30.69	132	2.38e-31	3	290	196	30690	588	570	cydD	286	689	AAD47141.1	400
1794	53.2313	30.032	126	1.05e-30	5	313	203	30032	588	581	cydD	279	345	BAG57529.1	39
1795	64.966	29.058	127	1.19e-30	10	382	234	29058	588	570	cydD	207	413	BAD18770.1	51
1796	64.966	29.058	127	1.69e-30	10	382	234	29058	588	570	cydD	207	422	XP_011542438.1	60
1797	76.5306	26.889	129	2.43e-30	13	450	263	26889	588	570	cydD	153	664	AAN76500.1	249
1798	76.5306	26.889	129	2.44e-30	13	450	263	26889	588	570	cydD	153	665	EAW93728.1	250
1800	39.966	31.489	126	3.54e-30	3	235	157	31489	588	581	cydD	350	444	AAY24100.1	211
1801	76.5306	26.889	128	4.93e-30	13	450	263	26889	588	570	cydD	153	795	NP_848654.3	380
1802	28.9116	34.706	117	1.84e-26	0	170	111	34706	588	581	cydD	412	175	NP_848654.3	6
1803	76.5306	26.889	128	5.2e-30	13	450	263	26889	588	570	cydD	153	795	AAO73470.1	380
1804	28.9116	34.706	117	1.74e-26	0	170	111	34706	588	581	cydD	412	175	AAO73470.1	6
1805	76.5306	26.889	128	5.27e-30	13	450	263	26889	588	570	cydD	153	815	AAQ03033.1	400
1806	30.2721	33.708	118	9.5e-27	0	178	118	33708	588	581	cydD	404	195	AAQ03033.1	18
1807	64.966	29.058	127	6.09e-30	10	382	234	29058	588	570	cydD	207	539	XP_011542437.1	177
1808	76.5306	26.667	128	7.39e-30	13	450	264	26667	588	570	cydD	153	795	ADV32637.1	380
1809	28.9116	34.706	117	1.61e-26	0	170	111	34706	588	581	cydD	412	175	ADV32637.1	6
1810	64.966	29.058	127	8.43e-30	10	382	234	29058	588	570	cydD	207	568	4AYT_A	206
1811	64.966	29.058	126	1.13e-29	10	382	234	29058	588	570	cydD	207	599	4AYW_A	237
1812	84.5238	26.358	127	1.46e-29	11	497	339	26358	588	582	cydD	98	689	XP_011510382.1	208
1813	64.6259	29.211	126	2.03e-29	9	380	236	29211	588	570	cydD	207	718	NP_036221.2	356
1814	84.5238	26.358	126	2.09e-29	11	497	339	26358	588	582	cydD	98	655	AAY24305.1	174
1815	64.966	29.843	126	2.18e-29	10	382	231	29843	588	570	cydD	207	718	AAF78198.1	356
1816	84.3537	26.815	127	2.22e-29	10	496	336	26815	588	581	cydD	98	654	AAC77455.1	174
1817	39.966	31.489	126	4.42e-29	3	235	157	31489	588	581	cydD	350	1314	AAC77455.1	1081
1818	64.6259	29.474	126	2.77e-29	10	380	234	29474	588	570	cydD	207	717	BAB20265.1	356
1819	78.7415	25.486	125	2.89e-29	8	463	326	25486	588	543	cydD	89	652	NP_001269221.1	201
1820	39.966	31.489	126	3.09e-29	3	235	157	31489	588	581	cydD	350	790	BAG63812.1	557
1822	39.966	31.489	125	3.15e-29	3	235	157	31489	588	581	cydD	350	756	XP_011510383.1	523
1824	37.2449	35.16	120	3.21e-29	2	219	131	35160	588	581	cydD	369	282	EAW98356.1	69
1825	39.966	31.489	126	3.77e-29	3	235	157	31489	588	581	cydD	350	909	XP_016860656.1	676
1826	38.6054	33.921	105	2.14e-22	2	227	148	33921	588	581	cydD	356	249	XP_016860656.1	24
1827	76.5306	26.667	125	4.34e-29	13	450	264	26667	588	570	cydD	153	795	AAW31630.1	380
1828	28.9116	35.294	119	5.66e-27	0	170	110	35294	588	581	cydD	412	175	AAW31630.1	6
1829	39.966	31.489	126	4.34e-29	3	235	157	31489	588	581	cydD	350	1091	XP_016860655.1	858
1830	73.4694	27.546	118	1.12e-26	9	432	292	27546	588	581	cydD	159	431	XP_016860655.1	12
1831	40.1361	31.356	126	4.38e-29	3	236	158	31356	588	582	cydD	350	1315	NP_003733.2	1081
1832	84.5238	26.358	126	4.79e-29	11	497	339	26358	588	582	cydD	98	655	NP_003733.2	174
1833	39.966	31.489	126	4.79e-29	3	235	157	31489	588	581	cydD	350	1314	AAD28285.1	1081
1834	84.3537	26.411	125	6.49e-29	11	496	338	26411	588	581	cydD	98	654	AAD28285.1	174
1835	84.5238	26.358	125	5.32e-29	11	497	339	26358	588	582	cydD	98	689	XP_016860654.1	208
1836	30.102	31.073	92.4	2.81e-18	3	177	118	31073	588	523	cydD	350	1290	XP_016860654.1	1115
1837	40.1361	31.356	125	5.35e-29	3	236	158	31356	588	582	cydD	350	1324	EAX11287.1	1090
1838	84.5238	26.358	125	6.23e-29	11	497	339	26358	588	582	cydD	98	655	EAX11287.1	174
1839	48.2993	30.986	125	5.36e-29	6	284	182	30986	588	581	cydD	306	695	NP_062570.1	418
1840	40.1361	31.356	125	5.46e-29	3	236	158	31356	588	582	cydD	350	1329	XP_006712880.1	1095
1841	84.5238	26.358	125	5.7e-29	11	497	339	26358	588	582	cydD	98	669	XP_006712880.1	188
1842	84.5238	26.358	125	5.85e-29	11	497	339	26358	588	582	cydD	98	689	XP_011510379.1	208
1843	40.1361	31.356	125	5.95e-29	3	236	158	31356	588	582	cydD	350	1349	XP_011510379.1	1115
1844	36.9048	33.641	122	2.77e-28	1	217	143	33641	588	581	cydD	366	632	EAW98359.1	416
1845	37.2449	35.16	121	2.89e-28	2	219	131	35160	588	581	cydD	369	457	XP_024304676.1	244
1846	38.0952	32.589	119	5.35e-28	3	224	141	32589	588	582	cydD	369	423	CAA29547.1	200
1847	36.3946	33.645	120	1.34e-27	1	214	141	33645	588	581	cydD	369	675	NP_001229942.1	462
1848	25.8503	40.132	110	1.03e-26	0	152	91	40132	588	581	cydD	430	162	EAW54059.1	11
1849	36.5646	32.558	116	6.71e-26	4	215	129	32558	588	581	cydD	369	603	XP_016860981.1	403
1850	33.3333	31.633	105	2.61e-22	2	196	132	31633	588	563	cydD	369	1229	XP_016860981.1	1035
1851	36.5646	32.558	116	8.03e-26	4	215	129	32558	588	581	cydD	369	781	XP_011510617.1	581
1853	36.5646	32.558	115	8.58e-26	4	215	129	32558	588	581	cydD	369	679	BAD92340.1	479
1854	36.5646	32.558	115	8.9e-26	4	215	129	32558	588	581	cydD	369	781	AAD04169.1	581
1855	33.3333	31.633	104	4.5e-22	2	196	132	31633	588	563	cydD	369	1407	AAD04169.1	1213
1856	36.5646	32.558	115	9.06e-26	4	215	129	32558	588	581	cydD	369	781	NP_005679.2	581
1857	33.3333	31.633	104	4.46e-22	2	196	132	31633	588	563	cydD	369	1407	NP_005679.2	1213
1858	36.5646	32.558	115	9.38e-26	4	215	129	32558	588	581	cydD	369	781	BAA76608.1	581
1859	33.3333	31.633	103	6.98e-22	2	196	132	31633	588	563	cydD	369	1407	BAA76608.1	1213
1860	35.5442	34.45	108	1.01e-25	5	209	127	34450	588	570	cydD	369	209	AAA84438.1	4
1861	36.5646	32.558	115	1.02e-25	4	215	129	32558	588	581	cydD	369	774	BAD92691.1	574
1862	33.3333	31.633	104	4.82e-22	2	196	132	31633	588	563	cydD	369	1400	BAD92691.1	1206
1863	36.5646	32.558	115	1.08e-25	4	215	129	32558	588	581	cydD	369	781	AAO49801.1	581
1864	33.3333	31.633	103	5.4e-22	2	196	132	31633	588	563	cydD	369	1364	AAO49801.1	1170
1865	36.9048	32.258	115	1.1e-25	4	217	131	32258	588	583	cydD	369	292	BAA22887.1	90
1866	33.3333	31.633	103	8.65e-22	2	196	132	31633	588	563	cydD	369	916	BAA22887.1	722
1867	36.5646	32.558	115	1.11e-25	4	215	129	32558	588	581	cydD	369	309	NP_001306961.1	109
1868	33.3333	31.633	103	6.62e-22	2	196	132	31633	588	563	cydD	369	935	NP_001306961.1	741
1869	36.5646	32.558	115	1.16e-25	4	215	129	32558	588	581	cydD	369	781	AAD37716.1	581
1870	33.3333	31.633	104	4.46e-22	2	196	132	31633	588	563	cydD	369	1407	AAD37716.1	1213
1871	67.3469	29.04	114	1.77e-25	13	396	248	29040	588	577	cydD	197	736	AAC12905.1	359
1872	67.3469	29.04	113	3.3e-25	13	396	248	29040	588	577	cydD	197	796	ARB08471.1	419
1873	36.9048	32.258	114	4.46e-25	4	217	130	32258	588	581	cydD	369	784	EAW78310.1	581
1874	33.3333	31.633	104	4.47e-22	2	196	132	31633	588	563	cydD	369	1410	EAW78310.1	1216
1875	67.3469	28.788	112	5.87e-25	13	396	249	28788	588	577	cydD	197	736	AAC12903.1	359
1876	67.3469	28.535	111	7.83e-25	13	396	250	28535	588	577	cydD	197	535	BAH13680.1	158
1877	67.3469	28.788	112	9.08e-25	13	396	249	28788	588	577	cydD	197	736	AAS55411.1	359
1878	67.3469	28.788	112	9.33e-25	13	396	249	28788	588	577	cydD	197	796	ARB08466.1	419
1879	64.4558	27.704	112	9.4e-25	10	379	246	27704	588	521	cydD	154	678	NP_001229943.1	317
1880	86.7347	24.118	112	9.84e-25	15	510	335	24118	588	582	cydD	97	752	XP_011521700.1	271
1881	19.0476	34.821	78.2	6.58e-14	1	112	72	34821	588	587	cydD	477	113	XP_011521700.1	2
1882	67.3469	28.535	111	1.03e-24	13	396	250	28535	588	577	cydD	197	535	NP_001278951.1	158
1883	64.4558	27.704	111	1.28e-24	10	379	246	27704	588	521	cydD	154	678	NP_982269.2	317
1884	67.3469	28.788	111	1.47e-24	13	396	249	28788	588	577	cydD	197	796	ARB08460.1	419
1885	81.1224	25.157	112	1.7e-24	14	477	308	25157	588	582	cydD	127	1375	NP_149163.2	927
1886	39.6259	31.76	105	1.38e-22	6	233	138	31760	588	587	cydD	361	736	NP_149163.2	519
1887	81.1224	25.157	111	1.96e-24	14	477	308	25157	588	582	cydD	127	1375	AAK58869.1	927
1888	39.6259	31.76	105	1.45e-22	6	233	138	31760	588	587	cydD	361	736	AAK58869.1	519
1889	81.1224	25.157	111	2.07e-24	14	477	308	25157	588	582	cydD	127	1339	XP_016879290.1	891
1890	39.6259	31.76	105	1.63e-22	6	233	138	31760	588	587	cydD	361	700	XP_016879290.1	483
1891	81.1224	25.157	111	2.4e-24	14	477	308	25157	588	582	cydD	127	1377	NP_001357425.1	929
1892	39.6259	31.76	105	1.7e-22	6	233	138	31760	588	587	cydD	361	736	NP_001357425.1	519
1893	81.1224	25.157	111	2.47e-24	14	477	308	25157	588	582	cydD	127	1056	XP_011521699.1	608
1894	39.6259	31.76	106	1.14e-22	6	233	138	31760	588	587	cydD	361	417	XP_011521699.1	200
1895	81.1224	25.157	111	2.57e-24	14	477	308	25157	588	582	cydD	127	1375	AAK19755.1	927
1896	39.6259	31.33	104	4.93e-22	6	233	139	31330	588	587	cydD	361	736	AAK19755.1	519
1897	67.3469	28.535	110	2.68e-24	13	396	250	28535	588	577	cydD	197	796	ARB08461.1	419
1898	67.3469	28.535	110	3.9e-24	13	396	250	28535	588	577	cydD	197	736	AAC12906.1	359
1899	67.3469	28.535	110	3.9e-24	13	396	250	28535	588	577	cydD	197	736	5U1D_A	359
1900	67.3469	28.535	109	5.15e-24	13	396	250	28535	588	577	cydD	197	689	EAX03651.1	312
1901	39.2857	31.602	109	5.75e-24	5	231	141	31602	588	587	cydD	359	554	BAD92210.1	339
1902	67.3469	28.535	109	8.19e-24	13	396	250	28535	588	577	cydD	197	796	NP_000584.2	419
1903	67.3469	28.535	109	8.19e-24	13	396	250	28535	588	577	cydD	197	796	ARB08470.1	419
1904	67.3469	28.535	109	8.19e-24	13	396	250	28535	588	577	cydD	197	796	BAG36500.1	419
1905	39.2857	32.035	109	8.8e-24	5	231	140	32035	588	587	cydD	359	594	XP_016875811.1	379
1906	39.2857	32.035	109	9.11e-24	5	231	140	32035	588	587	cydD	359	637	XP_016875809.1	422
1907	39.2857	32.035	108	1.12e-23	5	231	140	32035	588	587	cydD	359	637	NP_001098985.1	422
1908	64.2857	27.249	109	1.14e-23	9	378	246	27249	588	570	cydD	209	798	EAW96454.1	434
1909	35.3741	30.288	97.1	1.09e-19	3	208	142	30288	588	581	cydD	376	1444	EAW96454.1	1238
1910	43.7075	31.518	108	1.15e-23	6	257	149	31518	588	581	cydD	332	641	AAO40749.1	405
1911	64.2857	27.249	109	1.15e-23	9	378	246	27249	588	570	cydD	209	863	EAW96457.1	499
1912	35.3741	30.288	96.7	1.32e-19	3	208	142	30288	588	581	cydD	376	1509	EAW96457.1	1303
1913	39.2857	32.035	108	1.27e-23	5	231	140	32035	588	587	cydD	359	637	BAF83006.1	422
1914	39.2857	32.035	108	1.49e-23	5	231	140	32035	588	587	cydD	359	637	NP_005836.2	422
1915	35.3741	30.769	106	8.65e-23	1	208	143	30769	588	563	cydD	356	1254	NP_005836.2	1048
1916	39.2857	32.035	108	1.5e-23	5	231	140	32035	588	587	cydD	359	637	AAC27076.1	422
1917	35.3741	30.769	107	6.42e-23	1	208	143	30769	588	563	cydD	356	1254	AAC27076.1	1048
1918	38.9456	32.314	108	1.52e-23	5	229	138	32314	588	587	cydD	361	637	NP_001288758.1	424
1919	35.3741	30.769	106	9.46e-23	1	208	143	30769	588	563	cydD	356	1207	NP_001288758.1	1001
1920	39.2857	32.035	108	1.54e-23	5	231	140	32035	588	587	cydD	359	594	XP_005254082.1	379
1921	35.3741	30.769	106	8.68e-23	1	208	143	30769	588	563	cydD	356	1211	XP_005254082.1	1005
1922	39.2857	32.035	108	1.71e-23	5	231	140	32035	588	587	cydD	359	562	NP_001288759.1	347
1923	39.2857	32.035	108	1.79e-23	5	231	140	32035	588	587	cydD	359	637	AAL88745.1	422
1924	35.3741	30.769	106	9.7e-23	1	208	143	30769	588	563	cydD	356	1254	AAL88745.1	1048
1925	43.7075	31.518	108	1.87e-23	6	257	149	31518	588	581	cydD	332	699	AAL79528.1	463
1926	43.7075	31.518	108	1.96e-23	6	257	149	31518	588	581	cydD	332	699	EAW82705.1	463
1927	38.9456	32.314	108	2.39e-23	5	229	138	32314	588	587	cydD	361	227	AAC27077.1	14
1928	35.3741	30.769	106	9.66e-23	1	208	143	30769	588	563	cydD	356	844	AAC27077.1	638
1929	43.7075	31.518	108	2.44e-23	6	257	149	31518	588	581	cydD	332	699	AAL79529.1	463
1930	43.7075	31.518	107	2.64e-23	6	257	149	31518	588	581	cydD	332	699	EAW82707.1	463
1931	43.7075	31.518	107	3.21e-23	6	257	149	31518	588	581	cydD	332	699	EAW82711.1	463
1932	33.3333	32.653	102	1.49e-21	2	196	130	32653	588	563	cydD	369	1334	EAW82711.1	1140
1933	43.7075	31.518	107	3.21e-23	6	257	149	31518	588	581	cydD	332	699	NP_150229.2	463
1934	83.8435	23.935	103	5.58e-22	13	493	308	23935	588	563	cydD	97	1334	NP_150229.2	883
1935	43.7075	31.518	107	3.26e-23	6	257	149	31518	588	581	cydD	332	699	AAK76740.1	463
1936	33.3333	32.653	102	1.49e-21	2	196	130	32653	588	563	cydD	369	1334	AAK76740.1	1140
1937	67.1769	27.595	107	4.1e-23	13	395	252	27595	588	577	cydD	197	733	EAX03652.1	359
1938	37.7551	31.982	100	6.46e-23	5	222	132	31982	588	581	cydD	364	226	2CBZ_A	20
1939	40.1361	29.237	107	7.38e-23	4	236	158	29237	588	570	cydD	343	899	AAC16058.1	665
1940	32.1429	31.746	97.1	1.11e-19	2	189	127	31746	588	563	cydD	376	1526	AAC16058.1	1339
1941	40.1361	29.237	107	7.44e-23	4	236	158	29237	588	570	cydD	343	899	NP_064693.2	665
1942	32.1429	31.746	97.8	6.16e-20	2	189	127	31746	588	563	cydD	376	1526	NP_064693.2	1339
1943	40.1361	29.237	107	7.46e-23	4	236	158	29237	588	570	cydD	343	834	EAW96455.1	600
1944	35.3741	30.288	96.3	1.54e-19	3	208	142	30288	588	581	cydD	376	1480	EAW96455.1	1274
1945	40.1361	29.237	107	7.58e-23	4	236	158	29237	588	570	cydD	343	899	NP_005682.2	665
1946	35.3741	30.288	96.3	1.52e-19	3	208	142	30288	588	581	cydD	376	1545	NP_005682.2	1339
1947	40.1361	29.237	106	7.87e-23	4	236	158	29237	588	570	cydD	343	834	EAW96460.1	600
1948	32.1429	31.746	97.8	6.02e-20	2	189	127	31746	588	563	cydD	376	1461	EAW96460.1	1274
1949	40.1361	29.237	106	8.13e-23	4	236	158	29237	588	570	cydD	343	899	AAC16057.1	665
1950	35.3741	30.769	99.8	1.48e-20	3	208	141	30769	588	581	cydD	376	1545	AAC16057.1	1339
1951	62.7551	28.726	106	9.4e-23	13	369	233	28726	588	570	cydD	209	811	NP_001185863.1	466
1952	33.6735	29.798	76.6	2.53e-13	4	198	132	29798	588	563	cydD	369	1459	NP_001185863.1	1266
1953	62.7551	28.726	106	9.59e-23	13	369	233	28726	588	570	cydD	209	862	XP_011513276.2	517
1954	33.6735	29.798	76.6	2.38e-13	4	198	132	29798	588	563	cydD	369	1510	XP_011513276.2	1317
1955	64.966	26.44	106	9.98e-23	10	382	248	26440	588	581	cydD	209	884	XP_016878732.1	527
1956	62.7551	28.726	106	1.03e-22	13	369	233	28726	588	570	cydD	209	643	EAX04180.1	298
1957	33.6735	29.798	77	1.55e-13	4	198	132	29798	588	563	cydD	369	1291	EAX04180.1	1098
1958	35.3741	30.769	105	1.12e-22	1	208	143	30769	588	563	cydD	356	749	XP_016875810.1	543
1959	21.2585	35.2	78.2	5.52e-14	1	125	80	35200	588	587	cydD	464	132	XP_016875810.1	8
1960	64.966	26.44	106	1.16e-22	10	382	248	26440	588	581	cydD	209	796	XP_016878730.1	439
1961	36.2245	30.516	100	8.31e-21	2	213	146	30516	588	580	cydD	369	1454	XP_016878730.1	1243
1962	64.966	26.44	106	1.18e-22	10	382	248	26440	588	581	cydD	209	884	XP_016878726.1	527
1963	36.2245	30.516	100	7.9e-21	2	213	146	30516	588	580	cydD	369	1542	XP_016878726.1	1331
1964	64.966	26.44	106	1.18e-22	10	382	248	26440	588	581	cydD	209	866	NP_004987.2	509
1965	36.2245	30.516	100	7.34e-21	2	213	146	30516	588	580	cydD	369	1524	NP_004987.2	1313
1966	64.966	26.44	106	1.28e-22	10	382	248	26440	588	581	cydD	209	857	EAW53944.1	500
1968	64.966	26.44	106	1.3e-22	10	382	248	26440	588	581	cydD	209	866	AAB46616.1	509
1969	36.2245	30.516	100	7.6e-21	2	213	146	30516	588	580	cydD	369	1524	AAB46616.1	1313
1970	64.966	26.44	106	1.31e-22	10	382	248	26440	588	581	cydD	209	850	AAB83979.1	493
1971	36.2245	30.516	100	7.71e-21	2	213	146	30516	588	580	cydD	369	1508	AAB83979.1	1297
1972	64.966	26.44	106	1.31e-22	10	382	248	26440	588	581	cydD	209	857	EAW53939.1	500
1973	36.2245	30.516	100	8.21e-21	2	213	146	30516	588	580	cydD	369	1515	EAW53939.1	1304
1974	64.966	26.44	106	1.34e-22	10	382	248	26440	588	581	cydD	209	838	XP_016878728.1	481
1975	36.2245	30.516	100	8.1e-21	2	213	146	30516	588	580	cydD	369	1496	XP_016878728.1	1285
1976	64.966	26.44	105	1.36e-22	10	382	248	26440	588	581	cydD	209	842	XP_016878727.1	485
1977	36.2245	30.516	100	9.08e-21	2	213	146	30516	588	580	cydD	369	1500	XP_016878727.1	1289
1978	64.966	26.44	105	1.41e-22	10	382	248	26440	588	581	cydD	209	858	XP_011520799.1	501
1979	36.2245	30.516	100	7.39e-21	2	213	146	30516	588	580	cydD	369	1516	XP_011520799.1	1305
1980	64.966	26.44	105	1.51e-22	10	382	248	26440	588	581	cydD	209	815	EAW53949.1	458
1981	36.2245	30.516	100	1.06e-20	2	213	146	30516	588	580	cydD	369	1473	EAW53949.1	1262
1982	39.6259	31.76	105	1.54e-22	6	233	138	31760	588	587	cydD	361	736	NP_660187.1	519
1983	81.1224	22.851	74.7	9.35e-13	15	477	281	22851	588	582	cydD	127	1337	NP_660187.1	927
1984	64.966	26.44	105	1.55e-22	10	382	248	26440	588	581	cydD	209	850	AAB83983.1	493
1986	39.6259	31.76	105	1.58e-22	6	233	138	31760	588	587	cydD	361	736	AAL99902.1	519
1987	81.1224	22.851	74.7	9.93e-13	15	477	281	22851	588	582	cydD	127	1337	AAL99902.1	927
1988	64.966	26.44	105	1.6e-22	10	382	248	26440	588	581	cydD	209	800	EAW53941.1	443
1989	36.2245	30.516	100	6.51e-21	2	213	146	30516	588	580	cydD	369	1458	EAW53941.1	1247
1990	64.966	26.44	105	1.67e-22	10	382	248	26440	588	581	cydD	209	800	EAW53942.1	443
1991	36.2245	30.516	100	6.88e-21	2	213	146	30516	588	580	cydD	369	1468	EAW53942.1	1257
1992	39.6259	31.76	105	1.67e-22	6	233	138	31760	588	587	cydD	361	736	BAG63044.1	519
1993	64.966	26.44	105	1.72e-22	10	382	248	26440	588	581	cydD	209	758	EAW53940.1	401
1994	36.2245	30.516	100	7.88e-21	2	213	146	30516	588	580	cydD	369	1416	EAW53940.1	1205
1995	64.966	26.44	105	1.74e-22	10	382	248	26440	588	581	cydD	209	800	EAW53936.1	443
1997	41.3265	30.041	100	1.94e-22	5	243	151	30041	588	581	cydD	343	251	4C3Z_A	24
1998	77.551	28.07	105	1.98e-22	16	456	268	28070	588	581	cydD	150	809	AAC15785.1	390
1999	39.6259	31.76	105	2.05e-22	6	233	138	31760	588	587	cydD	361	736	XP_016879292.1	519
2000	77.551	28.728	105	2.1e-22	17	456	265	28728	588	581	cydD	150	851	AAI31733.1	432
2001	36.7347	31.944	89.7	2.2e-17	3	216	139	31944	588	580	cydD	369	1496	AAI31733.1	1285
2002	58.6735	29.565	105	2.11e-22	11	345	217	29565	588	570	cydD	233	367	NP_001337447.1	42
2003	33.6735	29.798	77	1.38e-13	4	198	132	29798	588	563	cydD	369	1015	NP_001337447.1	822
2004	60.5442	27.247	105	2.37e-22	9	356	230	27247	588	581	cydD	235	540	CAH18691.1	205
2005	36.2245	30.516	100	5.2e-21	2	213	146	30516	588	580	cydD	369	1208	CAH18691.1	997
2006	64.966	26.44	105	2.39e-22	10	382	248	26440	588	581	cydD	209	764	BAD92357.1	407
2007	36.2245	30.516	100	7.57e-21	2	213	146	30516	588	580	cydD	369	1432	BAD92357.1	1221
2008	77.551	28.07	104	2.47e-22	16	456	268	28070	588	581	cydD	150	851	XP_011520784.1	432
2009	33.3333	31.633	104	2.5e-22	2	196	132	31633	588	563	cydD	369	652	EAW78306.1	458
2010	60.3741	27.324	104	2.89e-22	9	355	229	27324	588	581	cydD	236	351	AAC05808.1	17
2011	41.8367	34.959	98.6	3.29e-22	8	246	135	34959	588	581	cydD	343	230	6BZS_A	3
2012	39.7959	29.06	103	3.61e-22	4	234	140	29060	588	581	cydD	350	732	BAG64170.1	523
2014	77.0408	28.035	104	3.76e-22	15	453	261	28035	588	581	cydD	150	840	XP_011520781.1	432
2015	36.7347	31.944	89.4	2.68e-17	3	216	139	31944	588	580	cydD	369	1485	XP_011520781.1	1274
2016	66.3265	29.744	101	4.5e-22	14	390	217	29744	588	581	cydD	203	371	EAW53952.1	28
2017	36.2245	30.516	100	4.64e-22	2	213	146	30516	588	580	cydD	369	309	AAH01636.1	98
2018	77.551	28.509	104	4.78e-22	17	456	266	28509	588	581	cydD	150	851	NP_001162.4	432
2019	36.7347	31.944	89.7	2.06e-17	3	216	139	31944	588	580	cydD	369	1496	NP_001162.4	1285
2020	77.551	28.07	104	5e-22	16	456	268	28070	588	581	cydD	150	851	AAC79696.1	432
2021	36.7347	31.944	89.7	2.15e-17	3	216	139	31944	588	580	cydD	369	1496	AAC79696.1	1285
2022	54.7619	28.882	103	5.03e-22	10	322	190	28882	588	570	cydD	256	486	EAX10058.1	197
2024	77.551	28.509	104	5.31e-22	17	456	266	28509	588	581	cydD	150	851	CAO81806.1	432
2025	36.7347	31.944	89.4	2.28e-17	3	216	139	31944	588	580	cydD	369	1496	CAO81806.1	1285
2026	33.6735	32.323	103	6.34e-22	2	198	132	32323	588	577	cydD	381	1528	AAB09422.1	1332
2027	38.6054	30.837	100	6.4e-21	5	227	135	30837	588	587	cydD	369	869	AAB09422.1	657
2028	33.6735	32.323	103	6.39e-22	2	198	132	32323	588	577	cydD	381	1296	XP_006717693.1	1100
2029	38.6054	30.837	100	5.28e-21	5	227	135	30837	588	587	cydD	369	637	XP_006717693.1	425
2030	77.551	28.07	103	6.5e-22	16	456	268	28070	588	581	cydD	150	851	O95255.2	432
2031	36.7347	31.944	89.7	2.04e-17	3	216	139	31944	588	580	cydD	369	1496	O95255.2	1285
2032	33.6735	32.323	103	6.8e-22	2	198	132	32323	588	577	cydD	381	1528	AAB39892.1	1332
2033	38.6054	30.837	100	6.13e-21	5	227	135	30837	588	587	cydD	369	869	AAB39892.1	657
2034	33.6735	32.323	103	6.92e-22	2	198	132	32323	588	577	cydD	381	1528	NP_000383.2	1332
2035	38.6054	30.837	100	6.29e-21	5	227	135	30837	588	587	cydD	369	869	NP_000383.2	657
2036	77.551	28.728	103	7.55e-22	17	456	265	28728	588	581	cydD	150	851	AAD51293.1	432
2037	36.7347	31.944	87.4	9.13e-17	3	216	139	31944	588	580	cydD	369	1496	AAD51293.1	1285
2038	40.9864	30.29	103	8.38e-22	5	241	149	30290	588	581	cydD	345	835	XP_011520800.1	610
2039	36.2245	30.516	100	8.53e-21	2	213	146	30516	588	580	cydD	369	1493	XP_011520800.1	1282
2040	40.9864	30.29	103	8.65e-22	5	241	149	30290	588	581	cydD	345	751	EAW53947.1	526
2041	36.2245	30.516	100	7.33e-21	2	213	146	30516	588	580	cydD	369	1409	EAW53947.1	1198
2042	43.3673	29.412	103	8.7e-22	5	255	161	29412	588	581	cydD	331	808	EAW53946.1	569
2043	36.2245	30.516	100	8.86e-21	2	213	146	30516	588	580	cydD	369	1466	EAW53946.1	1255
2044	77.551	28.509	103	8.9e-22	17	456	266	28509	588	581	cydD	150	851	XP_016878703.1	432
2045	77.551	28.289	103	9.21e-22	16	456	267	28289	588	581	cydD	150	737	NP_001338729.1	318
2046	36.7347	31.944	89	3.01e-17	3	216	139	31944	588	580	cydD	369	1382	NP_001338729.1	1171
2047	77.551	28.728	103	9.67e-22	17	456	265	28728	588	581	cydD	150	863	XP_024306029.1	444
2048	36.7347	31.944	89.4	2.56e-17	3	216	139	31944	588	580	cydD	369	1508	XP_024306029.1	1297
2049	77.551	28.289	103	1.01e-21	16	456	267	28289	588	581	cydD	150	737	XP_011520782.1	318
2050	36.7347	31.944	89	2.99e-17	3	216	139	31944	588	580	cydD	369	1382	XP_011520782.1	1171
2051	39.2857	29.004	103	1.1e-21	3	231	152	29004	588	570	cydD	343	886	XP_005253346.1	665
2052	32.1429	31.746	97.8	6.03e-20	2	189	127	31746	588	563	cydD	376	1513	XP_005253346.1	1326
2053	39.2857	29.004	103	1.11e-21	3	231	152	29004	588	570	cydD	343	886	XP_006719088.1	665
2054	35.3741	30.288	96.3	1.59e-19	3	208	142	30288	588	581	cydD	376	1532	XP_006719088.1	1326
2055	49.1497	30.104	99	1.37e-21	8	289	187	30104	588	577	cydD	299	317	EAX03650.1	34
2056	74.6599	23.918	102	1.38e-21	9	439	296	23918	588	577	cydD	155	1517	NP_003777.2	1101
2057	77.8912	25.546	98.6	2.99e-20	12	458	294	25546	588	583	cydD	142	851	NP_003777.2	425
2058	74.6599	23.918	102	1.43e-21	9	439	296	23918	588	577	cydD	155	1523	BAD92191.1	1107
2059	77.8912	25.546	99	2.63e-20	12	458	294	25546	588	583	cydD	142	857	BAD92191.1	431
2060	74.6599	23.918	102	1.46e-21	9	439	296	23918	588	577	cydD	155	1517	BAA28146.1	1101
2061	77.8912	25.328	97.4	7.3e-20	12	458	295	25328	588	583	cydD	142	851	BAA28146.1	425
2062	74.6599	23.918	102	1.49e-21	9	439	296	23918	588	577	cydD	155	1517	CAA76658.2	1101
2063	77.8912	25.546	98.6	3.18e-20	12	458	294	25546	588	583	cydD	142	851	CAA76658.2	425
2064	74.6599	23.918	102	1.49e-21	9	439	296	23918	588	577	cydD	155	1518	AAD01430.1	1102
2065	78.0612	26.144	99	2.77e-20	14	459	290	26144	588	583	cydD	142	852	AAD01430.1	426
2066	36.2245	30.516	100	1.51e-21	2	213	146	30516	588	580	cydD	369	394	AAC15784.1	183
2067	35.7143	31.429	97.8	1.75e-21	2	210	142	31429	588	577	cydD	369	275	AAD38185.1	67
2068	74.6599	23.918	102	1.76e-21	9	439	296	23918	588	577	cydD	155	1517	AAC34668.1	1101
2069	77.8912	25.546	98.6	2.79e-20	12	458	294	25546	588	583	cydD	142	851	AAC34668.1	425
2070	34.0136	29	100	1.88e-21	1	200	141	29000	588	561	cydD	362	425	AAB46340.2	227
2071	35.8844	29.384	99.4	2.09e-21	2	211	144	29384	588	570	cydD	362	240	3GD7_A	33
2072	64.966	27.487	98.6	3.44e-21	13	382	235	27487	588	561	cydD	197	365	AAD50509.1	9
2073	38.9456	31.878	101	3.65e-21	5	229	135	31878	588	565	cydD	356	934	XP_016873690.1	708
2074	72.619	25.761	101	3.68e-21	13	427	234	25761	588	565	cydD	207	912	NP_001274103.1	501
2075	33.3333	29.592	78.2	8.09e-14	2	196	136	29592	588	563	cydD	369	1559	NP_001274103.1	1365
2076	72.619	25.761	101	3.81e-21	13	427	234	25761	588	565	cydD	207	911	NP_001338225.1	500
2077	33.3333	29.592	78.2	8.16e-14	2	196	136	29592	588	563	cydD	369	1558	NP_001338225.1	1364
2078	36.9048	33.18	95.9	4.05e-21	5	217	133	33180	588	577	cydD	369	248	1JJ7_A	36
2079	38.9456	31.878	101	4.22e-21	5	229	135	31878	588	565	cydD	356	933	XP_016873688.1	707
2080	33.3333	29.592	78.2	8.26e-14	2	196	136	29592	588	563	cydD	369	1580	XP_016873688.1	1386
2081	72.619	25.761	101	4.24e-21	13	427	234	25761	588	565	cydD	207	912	AAB02418.1	501
2082	33.3333	29.592	78.2	8.16e-14	2	196	136	29592	588	563	cydD	369	1559	AAB02418.1	1365
2083	38.9456	31.878	101	4.26e-21	5	229	135	31878	588	565	cydD	356	934	XP_016873686.1	708
2084	33.3333	29.592	78.2	8.26e-14	2	196	136	29592	588	563	cydD	369	1581	XP_016873686.1	1387
2085	73.6395	24.249	99.8	4.39e-21	10	433	302	24249	588	577	cydD	155	475	AAB71756.1	59
2086	36.2245	30.516	100	5.57e-21	2	213	146	30516	588	580	cydD	369	1399	EAW53948.1	1188
2087	18.7075	36.364	69.7	3e-11	1	110	67	36364	588	581	cydD	475	741	EAW53948.1	632
2089	38.6054	30.837	100	5.61e-21	5	227	135	30837	588	587	cydD	369	869	CAB45309.1	657
2090	33.6735	31.818	100	6.07e-21	2	198	133	31818	588	577	cydD	381	1528	CAB45309.1	1332
2091	31.2925	30.978	95.5	5.76e-21	1	184	126	30978	588	545	cydD	362	249	AAW33656.1	67
2092	34.0136	29	100	6.23e-21	1	200	141	29000	588	561	cydD	362	1403	ABC87055.1	1205
2093	37.7551	23.874	73.6	2.36e-12	4	222	153	23874	588	581	cydD	362	626	ABC87055.1	419
2094	34.0136	29	100	6.31e-21	1	200	141	29000	588	561	cydD	362	1421	ABC87053.1	1223
2096	34.0136	29	100	6.36e-21	1	200	141	29000	588	561	cydD	362	1421	AAC13657.1	1223
2097	37.7551	23.874	73.2	2.47e-12	4	222	153	23874	588	581	cydD	362	644	AAC13657.1	437
2098	34.0136	29	100	6.42e-21	1	200	141	29000	588	561	cydD	362	1421	NP_000483.3	1223
2099	37.7551	23.874	73.6	1.99e-12	4	222	153	23874	588	581	cydD	362	644	NP_000483.3	437
2100	34.0136	29	100	6.42e-21	1	200	141	29000	588	561	cydD	362	1421	ABD72213.1	1223
2101	37.7551	23.874	73.6	1.99e-12	4	222	153	23874	588	581	cydD	362	644	ABD72213.1	437
2102	36.2245	30.516	100	6.71e-21	2	213	146	30516	588	580	cydD	369	1343	EAW53937.1	1132
2105	34.0136	29	100	6.82e-21	1	200	141	29000	588	561	cydD	362	1421	AAA35680.1	1223
2106	37.7551	23.874	73.2	2.81e-12	4	222	153	23874	588	581	cydD	362	644	AAA35680.1	437
2107	65.3061	28.646	100	6.86e-21	16	384	229	28646	588	570	cydD	209	783	NP_258261.2	423
2108	33.6735	29.798	77	1.91e-13	4	198	132	29798	588	563	cydD	369	1431	NP_258261.2	1238
2109	34.0136	29	100	6.88e-21	1	200	141	29000	588	561	cydD	362	1421	ABD72187.1	1223
2110	37.7551	23.874	73.2	2.65e-12	4	222	153	23874	588	581	cydD	362	644	ABD72187.1	437
2111	38.6054	30.837	100	6.89e-21	5	227	135	30837	588	587	cydD	369	869	XP_016871164.1	657
2112	38.6054	30.837	100	7.03e-21	5	227	135	30837	588	587	cydD	369	869	XP_006717694.1	657
2113	34.0136	29	100	7.21e-21	1	200	141	29000	588	561	cydD	362	1421	5UAK_A	1223
2114	37.7551	23.874	73.6	2.14e-12	4	222	153	23874	588	581	cydD	362	644	5UAK_A	437
2115	36.2245	30.516	100	7.21e-21	2	213	146	30516	588	580	cydD	369	1483	XP_016878729.1	1272
2116	18.7075	36.364	69.7	3.17e-11	1	110	67	36364	588	581	cydD	475	825	XP_016878729.1	716
2118	66.3265	29.744	100	7.23e-21	14	390	217	29744	588	581	cydD	203	371	EAW53950.1	28
2119	36.7347	31.944	89	2.77e-17	3	216	139	31944	588	580	cydD	369	1016	EAW53950.1	805
2120	36.2245	30.516	100	7.25e-21	2	213	146	30516	588	580	cydD	369	1402	EAW53943.1	1191
2122	41.4966	29.508	100	7.34e-21	5	244	150	29508	588	587	cydD	352	869	XP_011537593.1	640
2123	36.2245	30.516	100	7.36e-21	2	213	146	30516	588	580	cydD	369	1427	XP_016878731.1	1216
2126	36.2245	30.516	100	7.47e-21	2	213	146	30516	588	580	cydD	369	1449	AAB83981.1	1238
2127	18.7075	36.364	69.7	3.3e-11	1	110	67	36364	588	581	cydD	475	791	AAB83981.1	682
2129	36.2245	30.516	100	7.61e-21	2	213	146	30516	588	580	cydD	369	1456	EAW53945.1	1245
2130	18.7075	36.364	69.7	3.24e-11	1	110	67	36364	588	581	cydD	475	798	EAW53945.1	689
2132	65.3061	28.646	100	7.69e-21	16	384	229	28646	588	570	cydD	209	826	XP_016866935.1	466
2133	33.6735	29.798	76.6	2.45e-13	4	198	132	29798	588	563	cydD	369	1474	XP_016866935.1	1281
2134	36.2245	30.516	100	7.81e-21	2	213	146	30516	588	580	cydD	369	1452	AAB83980.1	1241
2136	34.0136	29	100	8.34e-21	1	200	141	29000	588	561	cydD	362	1421	ABD72201.1	1223
2137	37.7551	23.874	73.2	3.04e-12	4	222	153	23874	588	581	cydD	362	644	ABD72201.1	437
2138	65.3061	28.646	100	8.53e-21	16	384	229	28646	588	570	cydD	209	877	XP_016866940.1	517
2140	64.966	27.487	99.4	8.53e-21	13	382	235	27487	588	561	cydD	197	616	AAA79901.1	260
2141	36.2245	30.516	100	8.54e-21	2	213	146	30516	588	580	cydD	369	1459	EAW53938.1	1248
2143	65.3061	28.646	100	8.75e-21	16	384	229	28646	588	570	cydD	209	877	XP_016866939.1	517
2145	36.2245	30.516	100	8.77e-21	2	213	146	30516	588	580	cydD	369	1393	AAB83982.1	1182
2148	34.0136	29	100	8.95e-21	1	200	141	29000	588	561	cydD	362	1421	ABC87059.1	1223
2149	37.7551	23.874	73.6	2.39e-12	4	222	153	23874	588	581	cydD	362	644	ABC87059.1	437
2150	64.966	27.487	98.6	9.25e-21	13	382	235	27487	588	561	cydD	197	477	AAD23381.1	121
2151	38.9456	31.878	100	1.03e-20	5	229	135	31878	588	565	cydD	356	433	XP_016873691.1	207
2152	33.3333	29.592	76.3	2.56e-13	2	196	136	29592	588	563	cydD	369	1080	XP_016873691.1	886
2153	64.966	27.487	99.4	1.11e-20	13	382	235	27487	588	561	cydD	197	680	ARB08494.1	324
2154	65.3061	28.646	100	1.11e-20	16	384	229	28646	588	570	cydD	209	877	XP_016866934.1	517
2155	33.6735	29.798	76.6	2.67e-13	4	198	132	29798	588	563	cydD	369	1525	XP_016866934.1	1332
2156	65.1361	28.198	100	1.14e-20	15	383	232	28198	588	570	cydD	209	877	XP_016866942.1	517
2157	65.3061	28.646	99.8	1.23e-20	16	384	229	28646	588	570	cydD	209	877	XP_016866937.1	517
2159	65.3061	28.646	99.8	1.25e-20	15	384	229	28646	588	570	cydD	209	382	XP_016866943.1	22
2160	33.6735	29.798	77.4	1.34e-13	4	198	132	29798	588	563	cydD	369	1030	XP_016866943.1	837
2161	38.9456	31.878	99.8	1.27e-20	5	229	135	31878	588	565	cydD	356	367	XP_024304436.1	141
2162	33.3333	29.592	76.3	3.1e-13	2	196	136	29592	588	563	cydD	369	1014	XP_024304436.1	820
2163	64.966	27.487	98.2	1.3e-20	13	382	235	27487	588	561	cydD	197	477	AAD23601.1	121
2164	64.966	27.487	99	1.41e-20	13	382	235	27487	588	561	cydD	197	680	ARB08488.1	324
2165	64.966	27.487	99	1.65e-20	13	382	235	27487	588	561	cydD	197	680	ARB08490.1	324
2166	64.966	27.487	98.6	1.85e-20	13	382	235	27487	588	561	cydD	197	680	CAA80523.1	324
2167	34.0136	28.5	99.4	2.02e-20	1	200	142	28500	588	561	cydD	362	1421	6MSM_A	1223
2168	37.7551	23.874	73.6	2.25e-12	4	222	153	23874	588	581	cydD	362	644	6MSM_A	437
2169	64.966	27.487	98.2	2.21e-20	13	382	235	27487	588	561	cydD	197	680	NP_001276972.1	324
2170	72.2789	25.412	99	2.22e-20	12	425	237	25412	588	565	cydD	207	911	EAW68436.1	501
2171	70.5782	25.783	99	2.22e-20	13	415	238	25783	588	565	cydD	207	915	BAD92321.1	515
2172	64.966	27.487	98.2	2.51e-20	13	382	235	27487	588	561	cydD	197	680	AAA59841.1	324
2173	72.449	25.587	98.6	3.03e-20	13	426	235	25587	588	565	cydD	207	911	AAB36699.1	501
2174	33.3333	29.592	78.2	8.89e-14	2	196	136	29592	588	563	cydD	369	1558	AAB36699.1	1364
2175	72.449	25.587	98.6	3.06e-20	13	426	235	25587	588	565	cydD	207	911	AAC36724.1	501
2176	33.3333	29.592	78.2	7.29e-14	2	196	136	29592	588	563	cydD	369	1558	AAC36724.1	1364
2177	77.8912	25.546	98.6	3.07e-20	12	458	294	25546	588	583	cydD	142	851	CAC69553.1	425
2178	74.6599	23.235	90.1	1.47e-17	10	439	286	23235	588	577	cydD	155	1504	CAC69553.1	1101
2179	72.449	25.587	98.6	3.11e-20	13	426	235	25587	588	565	cydD	207	911	NP_000343.2	501
2180	33.3333	29.592	78.2	7.95e-14	2	196	136	29592	588	563	cydD	369	1558	NP_000343.2	1364
2181	64.966	27.487	97.8	3.13e-20	13	382	235	27487	588	561	cydD	197	681	BAD92190.1	325
2182	72.449	25.587	98.6	3.14e-20	13	426	235	25587	588	565	cydD	207	910	NP_001338226.1	500
2183	33.3333	29.592	78.2	8.02e-14	2	196	136	29592	588	563	cydD	369	1557	NP_001338226.1	1363
2184	64.966	27.487	97.8	3.15e-20	13	382	235	27487	588	561	cydD	197	680	ARB08502.1	324
2185	64.966	27.487	97.8	3.23e-20	13	382	235	27487	588	561	cydD	197	680	NP_000535.3	324
2186	72.449	25.587	98.6	3.52e-20	13	426	235	25587	588	565	cydD	207	911	EAW68437.1	501
2187	33.3333	29.592	78.2	7.76e-14	2	196	136	29592	588	563	cydD	369	1565	EAW68437.1	1371
2188	38.7755	31.579	98.6	3.62e-20	5	228	136	31579	588	565	cydD	356	933	NP_001338224.1	708
2189	33.3333	29.592	78.2	8.19e-14	2	196	136	29592	588	563	cydD	369	1580	NP_001338224.1	1386
2190	72.449	25.587	98.6	3.67e-20	13	426	235	25587	588	565	cydD	207	911	AAB02278.1	501
2191	33.3333	29.592	78.2	8.23e-14	2	196	136	29592	588	563	cydD	369	1558	AAB02278.1	1364
2192	78.2313	26.522	98.2	3.83e-20	15	460	287	26522	588	583	cydD	142	626	EAW94591.1	200
2193	78.2313	26.522	98.2	4.36e-20	15	460	287	26522	588	583	cydD	142	851	EAW94590.1	425
2194	78.2313	26.522	98.2	4.39e-20	15	460	287	26522	588	583	cydD	142	851	AAD02846.1	425
2195	64.966	27.487	97.4	5.02e-20	13	382	235	27487	588	561	cydD	197	680	BAB71769.1	324
2196	32.1429	31.746	97.8	5.58e-20	2	189	127	31746	588	563	cydD	376	1479	XP_005253347.1	1292
2197	39.4558	26.293	80.9	9.99e-15	4	232	123	26293	588	570	cydD	343	852	XP_005253347.1	665
2198	65.3061	28.646	97.4	7.58e-20	16	384	229	28646	588	570	cydD	209	782	AAK39642.1	422
2199	33.6735	29.293	74.3	1.13e-12	4	198	133	29293	588	563	cydD	369	1430	AAK39642.1	1237
2200	38.7755	31.579	97.1	8.23e-20	5	228	136	31579	588	565	cydD	356	230	XP_016873693.1	5
2201	33.3333	29.592	76.3	2.69e-13	2	196	136	29592	588	563	cydD	369	877	XP_016873693.1	683
2202	20.2381	37.815	85.1	1.44e-18	1	119	72	37815	588	587	cydD	471	121	EAW70705.1	3
2203	20.9184	34.959	84.7	1.54e-18	0	123	80	34959	588	534	cydD	412	128	AAW31629.1	6
2204	64.966	26.702	92.4	1.62e-18	12	382	238	26702	588	561	cydD	197	680	BAD97020.1	324
2205	36.7347	31.944	88.2	1.76e-18	3	216	139	31944	588	580	cydD	369	244	6BZR_B	33
2206	27.551	38.272	89	2.23e-18	2	162	89	38272	588	524	cydD	369	285	EAW98355.1	129
2207	30.7823	29.282	87.4	2.91e-18	1	181	127	29282	588	561	cydD	381	182	AAW33657.1	3
2208	36.7347	31.944	87.8	3.47e-18	3	216	139	31944	588	580	cydD	369	261	EAW53951.1	50
2209	36.7347	31.944	90.5	3.68e-18	3	216	139	31944	588	580	cydD	369	446	CAA65019.1	235
2210	27.2109	36.25	90.9	4.49e-18	1	160	101	36250	588	524	cydD	366	575	EAW98361.1	416
2211	20.9184	34.146	83.2	5.24e-18	0	123	81	34146	588	534	cydD	412	128	NP_001157414.1	6
2212	19.898	35.043	82.8	6.56e-18	0	117	76	35043	588	528	cydD	412	122	NP_001157465.1	6
2213	27.551	38.272	89	9.91e-18	2	162	89	38272	588	524	cydD	369	400	BAG51360.1	244
2214	27.551	38.272	88.6	1.03e-17	2	162	89	38272	588	524	cydD	369	400	XP_024304677.1	244
2215	35.034	32.524	86.7	1.68e-17	5	206	127	32524	588	577	cydD	380	311	ALQ33805.1	110
2216	36.7347	31.944	89.4	2.42e-17	3	216	139	31944	588	580	cydD	369	1440	XP_016878701.1	1229
2218	58.3333	27.697	88.2	3.48e-17	11	343	208	27697	588	522	cydD	197	643	AAD12059.1	324
2219	58.3333	27.697	87.8	4.44e-17	11	343	208	27697	588	522	cydD	197	643	NP_061313.2	324
2220	27.0408	38.365	87	4.48e-17	2	159	87	38365	588	521	cydD	369	424	CAD38811.1	271
2221	58.3333	27.405	87.8	5.46e-17	10	343	209	27405	588	522	cydD	197	643	BAG61534.1	324
2222	20.4082	36.667	80.9	9.36e-17	1	120	74	36667	588	587	cydD	470	151	EAW70697.1	32
2223	23.9796	32.624	82.4	2.45e-16	0	141	95	32624	588	570	cydD	430	216	ALQ33332.1	76
2224	67.6871	27.387	83.2	1.91e-15	15	398	232	27387	588	526	cydD	150	793	CAN84639.1	432
2225	34.6939	26.471	77.8	7.38e-15	6	204	134	26471	588	570	cydD	369	248	6GJQ_A	59
2226	33.3333	29.592	77.8	3.5e-14	2	196	136	29592	588	563	cydD	369	372	AAA99227.1	178
2227	34.6939	25.49	76.3	3.66e-14	4	204	135	25490	588	570	cydD	369	245	2BBT_A	57
2228	34.6939	25.49	75.9	4.62e-14	4	204	135	25490	588	570	cydD	369	245	2BBS_A	57
2229	34.6939	25.98	73.9	8.61e-14	6	204	134	25980	588	570	cydD	369	215	2PZF_A	27
2230	66.6667	24.745	77.4	9.74e-14	12	392	213	24745	588	577	cydD	197	739	EAX03646.1	419
2231	33.6735	29.798	74.7	1.2e-13	4	198	132	29798	588	563	cydD	369	249	AAH24103.1	56
2232	34.6939	25.49	73.6	1.26e-13	6	204	136	25490	588	570	cydD	369	216	2PZE_A	27
2233	33.6735	29.798	77	1.44e-13	4	198	132	29798	588	563	cydD	369	808	XP_011513287.1	615
2234	25.5102	34.667	76.3	2.8e-13	3	150	94	34667	588	570	cydD	423	160	XP_011513287.1	13
2235	33.6735	29.798	76.6	1.59e-13	4	198	132	29798	588	563	cydD	369	565	EAX04184.1	372
2236	34.6939	25.49	73.2	1.72e-13	6	204	136	25490	588	570	cydD	369	228	2PZG_A	39
2237	33.6735	29.798	76.3	2.17e-13	4	198	132	29798	588	563	cydD	369	667	CAB63742.1	474
2238	33.6735	29.798	75.5	3.4e-13	4	198	132	29798	588	563	cydD	369	673	BAB15736.1	480
2239	48.1293	26.502	72.8	8.57e-13	9	283	180	26502	588	560	cydD	285	330	XP_011540179.1	69
2240	31.6327	30.645	70.5	9.78e-13	4	186	122	30645	588	563	cydD	381	183	CAB59263.1	2
2241	34.6939	25.98	72	1.03e-12	6	204	135	25980	588	570	cydD	369	246	1XMI_A	57
2242	34.6939	25.49	71.6	1.39e-12	6	204	135	25490	588	570	cydD	369	245	1XMJ_A	57
2243	37.7551	23.874	73.9	1.48e-12	4	222	153	23874	588	581	cydD	362	644	EAW83529.1	437
2244	38.7755	29.825	73.9	1.53e-12	8	228	135	29825	588	586	cydD	371	629	EAW89078.1	415
2246	38.7755	29.825	73.9	1.59e-12	8	228	135	29825	588	586	cydD	371	629	NP_525021.3	415
2248	43.8776	27.907	73.6	1.6e-12	12	258	145	27907	588	570	cydD	339	264	G02068	22
2249	38.7755	29.825	73.9	1.65e-12	8	228	135	29825	588	586	cydD	371	629	AAK30025.1	415
2251	38.7755	29.825	73.9	1.69e-12	8	228	135	29825	588	586	cydD	371	629	AAO72161.1	415
2253	34.6939	25	71.2	1.73e-12	6	204	137	25000	588	570	cydD	369	246	2BBO_A	57
2254	37.7551	23.874	73.6	1.79e-12	4	222	153	23874	588	581	cydD	362	644	AAB46352.1	437
2255	48.1293	26.502	73.2	1.82e-12	9	283	180	26502	588	560	cydD	285	642	CAA41416.1	381
2256	37.7551	23.874	73.9	1.83e-12	4	222	153	23874	588	581	cydD	362	644	ABD72215.1	437
2257	43.8776	27.907	73.2	2.04e-12	12	258	145	27907	588	570	cydD	339	300	BAA95530.1	58
2258	48.1293	26.502	73.2	2.07e-12	9	283	180	26502	588	560	cydD	285	666	XP_006710865.2	405
2259	43.8776	27.907	73.2	2.14e-12	12	258	145	27907	588	570	cydD	339	300	AAK28837.1	58
2260	41.6667	27.755	73.2	2.16e-12	11	245	140	27755	588	570	cydD	348	304	BAF84841.1	75
2261	48.1293	26.502	73.2	2.17e-12	9	283	180	26502	588	560	cydD	285	666	BAG59369.1	405
2262	48.1293	26.502	73.2	2.18e-12	9	283	180	26502	588	560	cydD	285	642	NP_002849.1	381
2263	43.8776	27.907	72.8	2.22e-12	12	258	145	27907	588	570	cydD	339	282	NP_997511.1	40
2264	43.8776	27.907	73.2	2.27e-12	12	258	145	27907	588	570	cydD	339	304	NP_004906.3	62
2265	43.8776	27.907	72.8	2.47e-12	12	258	145	27907	588	570	cydD	339	282	AAK28839.1	40
2266	43.8776	27.907	72.8	2.51e-12	12	258	145	27907	588	570	cydD	339	300	CAA62631.1	58
2267	43.8776	27.907	72.8	2.54e-12	12	258	145	27907	588	570	cydD	339	301	AAK28840.1	59
2268	43.8776	27.907	72.8	2.57e-12	12	258	145	27907	588	570	cydD	339	301	NP_997512.1	59
2269	43.8776	27.907	72.8	2.58e-12	12	258	145	27907	588	570	cydD	339	304	EAX09574.1	62
2270	43.8776	27.907	72.8	2.59e-12	12	258	145	27907	588	570	cydD	339	300	AAK28841.1	58
2271	43.8776	27.907	72.8	2.64e-12	12	258	145	27907	588	570	cydD	339	315	XP_011528108.1	73
2272	43.8776	27.907	72.8	2.64e-12	12	258	145	27907	588	570	cydD	339	304	NP_058198.2	62
2273	41.6667	27.755	72.8	2.71e-12	11	245	140	27755	588	570	cydD	348	304	EAX09575.1	75
2274	43.8776	27.907	72.8	2.94e-12	12	258	145	27907	588	570	cydD	339	306	NP_997510.1	64
2275	41.6667	27.755	72.4	3.13e-12	11	245	140	27755	588	570	cydD	348	315	NP_997057.1	86
2276	41.6667	27.755	72.4	3.27e-12	11	245	140	27755	588	570	cydD	348	315	AAK28842.1	86
2277	43.8776	27.907	72.4	3.31e-12	12	258	145	27907	588	570	cydD	339	315	BAG60699.1	73
2278	43.8776	27.907	72.4	3.32e-12	12	258	145	27907	588	570	cydD	339	306	AAK28838.1	64
2279	48.1293	26.502	72	3.8e-12	9	283	180	26502	588	560	cydD	285	569	BAG63934.1	308
2280	41.6667	27.755	71.2	7.67e-12	11	245	140	27755	588	570	cydD	348	315	XP_011528109.1	86
2281	43.3673	27.059	70.5	1.14e-11	7	255	161	27059	588	532	cydD	285	617	EAW73046.1	381
2282	41.4966	27.869	70.5	1.2e-11	7	244	151	27869	588	521	cydD	285	606	CAA58470.1	381
2283	45.7483	25.651	68.9	3.16e-11	8	269	174	25651	588	560	cydD	299	532	AAH68509.1	283
2284	38.4354	27.434	68.6	5.05e-11	8	226	136	27434	588	543	cydD	328	664	XP_016874481.1	457
2285	16.1565	34.737	63.2	5.22e-11	0	95	62	34737	588	522	cydD	428	127	AAA58649.1	33
2286	38.4354	27.434	68.6	6.58e-11	8	226	136	27434	588	543	cydD	328	664	NP_005155.1	457
2287	16.1565	34.737	62.8	7.19e-11	0	95	62	34737	588	522	cydD	428	127	AAA58648.1	33
2288	37.7551	27.477	67.4	1.31e-10	10	222	132	27477	588	570	cydD	363	412	XP_024307909.1	206
2289	37.7551	27.477	67.4	1.4e-10	10	222	132	27477	588	570	cydD	363	411	AAL06598.1	205
2290	13.9456	35.366	61.6	1.56e-10	0	82	53	35366	588	570	cydD	489	83	AAP31917.1	2
2291	34.3537	27.723	66.2	1.69e-10	6	202	123	27723	588	543	cydD	350	382	AAB27045.1	196
2292	36.2245	28.169	66.6	2.47e-10	8	213	126	28169	588	570	cydD	375	280	NP_071881.1	78
2293	36.2245	28.169	66.2	2.58e-10	8	213	126	28169	588	570	cydD	375	280	5DO7_A	78
2294	17.0068	31	62	3.03e-10	0	100	69	31000	588	563	cydD	464	100	AAB71757.1	1
2295	36.2245	28.169	65.9	3.45e-10	8	213	126	28169	588	570	cydD	375	280	XP_011531326.1	78
2296	36.2245	28.169	65.9	3.83e-10	8	213	126	28169	588	570	cydD	375	280	XP_006712136.1	78
2297	36.2245	28.169	65.5	4.36e-10	8	213	126	28169	588	570	cydD	375	280	AAY24010.1	78
2298	36.2245	28.169	65.1	5.26e-10	8	213	126	28169	588	570	cydD	375	280	XP_005264537.1	78
2299	39.1156	32.174	65.9	5.75e-10	10	230	127	32174	588	586	cydD	371	716	XP_024306451.1	502
2300	39.1156	32.174	65.1	7.85e-10	10	230	127	32174	588	586	cydD	371	521	XP_016879895.1	307
2302	39.1156	32.174	65.1	8.22e-10	10	230	127	32174	588	586	cydD	371	716	AAI25233.1	502
2304	39.1156	32.174	65.1	8.85e-10	10	230	127	32174	588	586	cydD	371	716	EAW89075.1	502
2306	39.1156	32.174	65.1	8.93e-10	10	230	127	32174	588	586	cydD	371	716	AAM77557.1	502
2308	39.1156	32.174	65.1	9.08e-10	10	230	127	32174	588	586	cydD	371	716	NP_525023.2	502
2310	39.1156	32.174	65.1	9.32e-10	10	230	127	32174	588	586	cydD	371	716	AAK30023.1	502
2413	105.64	35.729	255	5.94e-78	12	487	261	35729	461	450	cysS	2	524	NP_078813.1	52
2414	105.64	35.729	255	6.97e-78	12	487	261	35729	461	450	cysS	2	524	AAH07220.1	52
2415	62.9067	43.103	222	1.32e-67	6	290	140	43103	461	278	cysS	2	329	XP_016876231.1	52
2416	67.2451	40.645	214	1.39e-64	6	310	159	40645	461	300	cysS	2	347	NP_001339182.1	52
2417	58.5683	42.593	207	9.54e-62	5	270	132	42593	461	260	cysS	2	309	XP_011519420.1	52
2418	91.974	35.613	209	1.39e-61	11	424	222	35613	461	450	cysS	64	411	XP_006720016.1	2
2419	58.5683	42.593	207	1.72e-61	5	270	132	42593	461	260	cysS	2	309	XP_011519419.1	52
2420	55.9653	43.023	200	2.71e-59	5	258	123	43023	461	309	cysS	64	247	BAH13582.1	2
2421	50.5423	42.489	196	2.15e-55	5	233	119	42489	461	312	cysS	94	409	AAA73901.1	178
2422	14.3167	48.485	73.6	7.08e-13	1	66	33	48485	461	81	cysS	17	66	AAA73901.1	1
2423	50.5423	42.489	197	2.53e-55	5	233	119	42489	461	312	cysS	94	388	EAX02539.1	157
2425	50.5423	42.489	197	3.09e-55	5	233	119	42489	461	312	cysS	94	360	XP_016873880.1	129
2427	50.5423	42.489	196	5.17e-55	5	233	119	42489	461	312	cysS	94	388	BAG58331.1	157
2429	50.5423	42.489	196	6.51e-55	5	233	119	42489	461	312	cysS	94	452	BAF82121.1	221
2430	17.5705	49.383	89.4	6.8e-18	1	81	40	49383	461	81	cysS	2	109	BAF82121.1	29
2431	50.5423	42.489	196	1.25e-54	5	233	119	42489	461	312	cysS	94	442	XP_016873878.1	211
2432	15.4013	49.296	77.8	3.58e-14	1	71	35	49296	461	81	cysS	12	99	XP_016873878.1	29
2433	50.5423	42.489	196	1.33e-54	5	233	119	42489	461	312	cysS	94	442	XP_006718404.1	211
2434	15.4013	49.296	77.8	3.58e-14	1	71	35	49296	461	81	cysS	12	99	XP_006718404.1	29
2435	50.5423	42.489	196	1.45e-54	5	233	119	42489	461	312	cysS	94	452	NP_001742.1	221
2436	17.5705	49.383	89.7	5.64e-18	1	81	40	49383	461	81	cysS	2	109	NP_001742.1	29
2437	50.5423	42.489	196	1.77e-54	5	233	119	42489	461	312	cysS	94	452	NP_644802.1	221
2438	17.5705	49.383	89.7	5.47e-18	1	81	40	49383	461	81	cysS	2	109	NP_644802.1	29
2439	50.5423	42.489	196	2.67e-54	5	233	119	42489	461	312	cysS	94	465	XP_016873881.1	234
2440	17.5705	49.383	89.7	6.28e-18	1	81	40	49383	461	81	cysS	2	122	XP_016873881.1	42
2441	50.5423	42.489	196	3.27e-54	5	233	119	42489	461	312	cysS	94	535	NP_001014437.1	304
2442	17.5705	49.383	90.1	4.79e-18	1	81	40	49383	461	81	cysS	2	192	NP_001014437.1	112
2443	50.5423	42.489	196	3.33e-54	5	233	119	42489	461	312	cysS	94	535	BAG60719.1	304
2444	17.5705	49.383	90.1	4.67e-18	1	81	40	49383	461	81	cysS	2	192	BAG60719.1	112
2445	50.5423	42.489	196	3.46e-54	5	233	119	42489	461	312	cysS	94	535	NP_001181926.1	304
2446	17.5705	49.383	90.1	4.63e-18	1	81	40	49383	461	81	cysS	2	192	NP_001181926.1	112
2447	50.5423	42.489	195	4.9e-54	5	233	119	42489	461	312	cysS	94	452	BAD96334.1	221
2448	17.5705	49.383	90.1	3.86e-18	1	81	40	49383	461	81	cysS	2	109	BAD96334.1	29
2449	90.4555	33.094	188	1.9e-53	10	417	244	33094	461	450	cysS	64	413	BAB93499.1	2
2450	85.2495	34.606	186	1.13e-52	11	393	206	34606	461	450	cysS	95	409	XP_011519418.1	31
2451	44.4685	45.366	186	7.78e-51	5	205	97	45366	461	284	cysS	94	332	XP_024304473.1	129
2453	44.0347	45.813	185	2.47e-50	5	203	95	45813	461	282	cysS	94	412	XP_024304472.1	211
2454	15.4013	49.296	77.8	3.82e-14	1	71	35	49296	461	81	cysS	12	99	XP_024304472.1	29
2455	44.0347	45.813	185	2.73e-50	5	203	95	45813	461	282	cysS	94	422	XP_024304471.1	221
2456	17.5705	49.383	89.7	5.93e-18	1	81	40	49383	461	81	cysS	2	109	XP_024304471.1	29
2457	44.0347	45.813	185	4.5e-50	5	203	95	45813	461	282	cysS	94	505	XP_024304469.1	304
2458	17.5705	49.383	90.1	4.78e-18	1	81	40	49383	461	81	cysS	2	192	XP_024304469.1	112
2459	44.0347	45.813	184	5.95e-50	5	203	95	45813	461	282	cysS	94	505	XP_024304470.1	304
2460	17.5705	49.383	90.1	4.63e-18	1	81	40	49383	461	81	cysS	2	192	XP_024304470.1	112
2461	56.833	31.679	97.8	1.33e-21	8	262	149	31679	461	450	cysS	217	262	NP_001339181.1	3
2462	15.4013	49.296	77.4	8.81e-15	1	71	35	49296	461	81	cysS	12	129	BAD92051.1	59
2497	75.3425	28.182	92.8	1.28e-20	3	220	147	28182	292	254	dapA	38	282	CAC84901.1	71
2498	73.2877	28.505	90.5	5.15e-20	3	214	142	28505	292	248	dapA	38	253	3S5N_A	48
2499	73.2877	28.505	90.9	5.22e-20	3	214	142	28505	292	248	dapA	38	276	NP_612422.2	71
2500	73.2877	28.037	88.2	3.39e-19	3	214	143	28037	292	248	dapA	38	256	3S5O_A	51
2501	89.0411	26.154	72.4	1.11e-13	6	260	177	26154	292	248	dapA	4	269	NP_001186985.1	10
2502	105.479	24.675	72.4	1.7e-13	8	308	201	24675	292	280	dapA	4	317	NP_110396.1	10
2503	105.479	24.675	72.4	1.89e-13	8	308	201	24675	292	280	dapA	4	317	BAG36036.1	10
2504	105.479	24.675	72.4	2.01e-13	8	308	201	24675	292	280	dapA	4	335	6ARH_A	28
2505	76.0274	25.225	65.1	2.55e-11	6	222	156	25225	292	218	dapA	4	228	NP_001186981.1	10
2510	108.267	21.921	62.8	8.91e-10	18	406	267	21921	375	375	dapE	4	400	NP_000657.1	11
2548	98.8166	32.934	79.3	6.25e-18	4	167	92	32934	169	147	def	1	168	3G5K_A	2
2549	95.2663	32.919	77	1.37e-16	4	161	88	32919	169	145	def	5	226	NP_071736.1	66
2550	95.2663	32.919	77	1.48e-16	4	161	88	32919	169	145	def	5	226	AAH19912.1	66
2587	36.1224	27.684	65.1	3.93e-10	3	177	106	27684	490	370	der	203	435	NP_001182351.1	272
2589	50.2041	25.61	64.7	4.48e-10	6	246	137	25610	490	370	der	155	435	BAH12694.1	206
2591	50.2041	25.61	64.7	4.54e-10	6	246	137	25610	490	370	der	155	413	AAH19261.1	184
2593	50.2041	25.61	64.7	5.27e-10	6	246	137	25610	490	370	der	155	413	AAK39555.1	184
2595	50.2041	25.61	64.3	5.91e-10	6	246	137	25610	490	370	der	155	413	NP_116009.2	184
2802	42.1182	33.333	82	5.07e-17	4	171	109	33333	406	174	dfp	8	189	BAB55151.1	20
2803	43.1034	32.571	81.6	6.23e-17	4	175	105	32571	406	174	dfp	8	189	NP_068595.3	20
2804	42.1182	33.333	81.3	8.12e-17	4	171	109	33333	406	174	dfp	8	191	1QZU_A	22
2805	42.1182	33.333	81.3	8.43e-17	4	171	109	33333	406	174	dfp	8	189	AAH14409.1	20
2806	40.1478	31.288	74.7	2.12e-14	4	163	99	31288	406	162	dfp	8	177	XP_016877954.1	20
2807	41.6256	29.586	63.2	9.68e-11	4	169	86	29586	406	174	dfp	8	157	NP_001288031.1	20
2924	48.367	24.759	78.6	1.19e-14	9	311	205	24759	643	313	dnaX	9	312	NP_031396.1	25
2925	48.2115	24.839	78.6	1.29e-14	9	310	203	24839	643	313	dnaX	9	309	NP_001193730.1	25
2926	48.367	24.759	78.2	1.55e-14	9	311	205	24759	643	313	dnaX	9	312	BAF83374.1	25
2927	48.2115	24.839	78.2	1.63e-14	9	310	203	24839	643	313	dnaX	9	323	BAD92229.1	39
2928	48.8336	24.522	77.4	2.72e-14	9	314	208	24522	643	313	dnaX	6	291	NP_853556.2	1
2929	48.367	24.759	77	3.69e-14	9	311	205	24759	643	313	dnaX	9	312	CAG28579.1	25
2930	44.79	23.611	75.1	1.29e-13	7	288	193	23611	643	291	dnaX	9	290	XP_016875268.1	25
2985	93.3775	35.461	82	1.36e-19	4	141	84	35461	151	151	dut	12	141	NP_001020420.1	7
2986	93.3775	35.461	82	1.57e-19	4	141	84	35461	151	151	dut	12	147	1Q5H_A	13
2987	93.3775	35.461	81.6	2.77e-19	4	141	84	35461	151	151	dut	12	164	NP_001939.1	30
2988	93.3775	35.461	81.3	3.84e-19	4	141	84	35461	151	151	dut	12	167	NP_001317215.1	33
2989	93.3775	34.752	79.3	1.99e-18	4	141	85	34752	151	151	dut	12	164	BAF84204.1	30
2990	93.3775	35.461	80.1	6.7e-18	4	141	84	35461	151	151	dut	12	252	AAB71393.1	118
2991	93.3775	35.461	79.7	9.64e-18	4	141	84	35461	151	151	dut	12	252	NP_001020419.1	118
2992	93.3775	34.752	77.8	4.45e-17	4	141	85	34752	151	151	dut	12	252	BAG60677.1	118
3013	80.1613	23.541	97.1	6.57e-20	18	497	324	23541	620	574	dxs	105	577	CAA47919.1	110
3014	80.1613	23.541	96.3	9.66e-20	18	497	324	23541	620	574	dxs	105	577	4KXU_A	110
3015	80.1613	23.541	96.3	9.67e-20	18	497	324	23541	620	574	dxs	105	575	3MOS_A	108
3016	80.1613	23.541	96.3	9.76e-20	18	497	324	23541	620	574	dxs	105	577	NP_001055.1	110
3017	80.1613	23.541	96.3	9.84e-20	18	497	324	23541	620	574	dxs	105	573	3OOY_A	106
3018	80.1613	23.541	95.9	1.06e-19	18	497	324	23541	620	574	dxs	105	530	BAG64284.1	63
3019	80.1613	23.541	95.9	1.09e-19	18	497	324	23541	620	574	dxs	105	490	AAH24026.2	23
3020	80.1613	23.541	96.3	1.14e-19	18	497	324	23541	620	574	dxs	105	577	AAA61222.1	110
3021	77.5806	23.909	95.5	1.63e-19	17	481	317	23909	620	574	dxs	121	494	BAG52746.1	36
3022	80.1613	23.34	94.4	3.99e-19	18	497	325	23340	620	574	dxs	105	577	BAD97334.1	110
3023	81.4516	23.168	93.2	9.88e-19	18	505	324	23168	620	574	dxs	105	585	NP_001244957.1	110
3024	81.4516	22.97	90.5	7.43e-18	18	505	325	22970	620	574	dxs	105	585	BAG56942.1	110
3025	50.8065	24.444	85.9	5.41e-17	10	315	209	24444	620	574	dxs	277	312	BAG51860.1	10
3026	50.8065	24.444	86.3	5.81e-17	10	315	209	24444	620	574	dxs	277	349	AAH08615.1	47
3027	50.8065	24.444	86.3	7.84e-17	10	315	209	24444	620	574	dxs	277	411	XP_011532357.1	109
3028	50.8065	24.444	85.5	1.25e-16	10	315	209	24444	620	574	dxs	277	379	BAG62803.1	77
3029	88.0645	23.26	84	7.83e-16	23	546	313	23260	620	619	dxs	130	538	NP_001139406.1	43
3030	88.0645	23.26	83.6	9.05e-16	23	546	313	23260	620	619	dxs	130	588	NP_001139405.1	93
3031	88.0645	23.26	83.6	1.06e-15	23	546	313	23260	620	619	dxs	130	594	BAF84913.1	99
3032	80.1613	24.145	83.6	1.07e-15	18	497	279	24145	620	569	dxs	126	576	BAB71427.1	125
3033	88.0645	23.26	83.6	1.09e-15	23	546	313	23260	620	619	dxs	130	594	NP_036385.3	99
3034	88.0645	23.26	83.6	1.09e-15	23	546	313	23260	620	619	dxs	130	594	EAW72750.1	99
3035	80.1613	24.145	83.6	1.17e-15	18	497	279	24145	620	569	dxs	126	576	NP_115512.3	125
3036	80.1613	24.145	83.6	1.22e-15	18	497	279	24145	620	569	dxs	126	576	AAI25102.1	125
3037	80.1613	23.944	83.6	1.23e-15	17	497	280	23944	620	569	dxs	126	576	AAH28707.4	125
3038	88.0645	23.26	82.4	2.51e-15	23	546	313	23260	620	619	dxs	130	594	AAH25382.2	99
3039	80.1613	23.944	82	3.36e-15	18	497	280	23944	620	569	dxs	126	576	BAG37115.1	125
3040	49.8387	24.919	78.6	1.24e-14	12	309	213	24919	620	619	dxs	323	334	BAH13660.1	33
3041	84.8387	22.814	79	3.05e-14	21	526	305	22814	620	619	dxs	145	560	BAH13542.1	85
3042	90.8065	22.913	75.1	5e-13	25	563	311	22913	620	619	dxs	130	555	CAA62925.1	43
3043	36.129	27.679	70.1	6.66e-12	6	224	151	27679	620	569	dxs	355	270	BAB71524.1	49
3122	99.3056	55.711	449	1.34e-155	8	429	176	55711	432	426	eno	6	427	CAA34513.1	5
3123	99.3056	55.478	447	7.77e-155	8	429	177	55478	432	426	eno	6	428	2XSX_A	6
3124	99.3056	55.478	447	9.98e-155	8	429	177	55478	432	426	eno	6	427	AAH17249.1	5
3125	99.3056	55.478	447	1.37e-154	8	429	177	55478	432	426	eno	6	427	CAA36216.1	5
3126	99.3056	55.478	447	1.49e-154	8	429	177	55478	432	426	eno	6	427	NP_001967.3	5
3127	99.3056	55.478	446	2.58e-154	8	429	177	55478	432	426	eno	6	436	XP_005256578.1	14
3128	99.537	52.791	427	5.04e-147	8	430	189	52791	432	425	eno	4	425	3UCC_A	2
3129	99.537	52.791	427	6.24e-147	8	430	189	52791	432	425	eno	4	426	NP_001966.1	3
3130	99.537	52.791	427	6.41e-147	8	430	189	52791	432	425	eno	4	425	1TE6_A	2
3131	99.537	52.791	427	7.33e-147	8	430	189	52791	432	425	eno	4	425	3UJE_A	2
3132	99.537	52.791	427	7.63e-147	8	430	189	52791	432	425	eno	4	426	4ZA0_A	3
3133	99.537	52.558	426	1.28e-146	8	430	190	52558	432	425	eno	4	425	CAA31512.1	2
3134	99.537	52.791	426	2.02e-146	8	430	189	52791	432	425	eno	4	426	BAF83214.1	3
3135	99.537	52.326	421	1.53e-144	8	430	191	52326	432	425	eno	4	426	NP_001419.1	3
3136	99.537	52.326	421	1.58e-144	8	430	191	52326	432	425	eno	4	425	3B97_A	2
3137	99.537	52.093	420	3.38e-144	8	430	192	52093	432	425	eno	4	426	BAD96912.1	3
3138	99.537	52.326	420	6.03e-144	8	430	191	52326	432	425	eno	4	426	BAD96237.1	3
3139	99.537	52.326	419	7.74e-144	8	430	191	52326	432	425	eno	4	426	CAA59331.1	3
3140	99.537	52.093	419	1.38e-143	8	430	192	52093	432	425	eno	4	426	CAD97642.1	3
3141	99.537	51.163	414	1.25e-141	8	430	196	51163	432	425	eno	4	426	NP_001340275.1	3
3142	92.3611	52.882	400	9.91e-137	7	399	175	52882	432	425	eno	35	400	AAA52388.1	7
3143	99.3056	51.515	395	6.33e-135	9	429	166	51515	432	426	eno	6	399	BAG62348.1	5
3144	98.8426	50.351	389	1.16e-132	8	427	159	50351	432	426	eno	6	384	NP_001180432.1	5
3145	98.8426	47.775	370	3.18e-125	8	427	170	47775	432	424	eno	4	382	BAH12015.1	3
3146	78.4722	54.867	357	1.29e-120	6	339	142	54867	432	426	eno	94	334	EAW90377.1	1
3147	104.63	50	360	3.09e-120	21	452	192	50000	432	425	eno	4	450	CAA47179.1	3
3148	85.8796	50.674	352	2.36e-118	7	371	170	50674	432	425	eno	63	366	CAH56247.1	1
3149	90.5093	46.547	333	1.24e-110	8	391	195	46547	432	386	eno	4	387	EAW70047.1	3
3150	78.2407	51.183	330	3.14e-110	6	338	154	51183	432	425	eno	94	333	NP_001188412.1	1
3151	77.5463	51.045	326	1.63e-108	6	335	153	51045	432	425	eno	97	330	ADK47995.1	1
3152	77.0833	51.051	322	3.76e-107	6	333	152	51051	432	425	eno	99	328	AAB88178.1	1
3153	66.6667	55.556	288	3.32e-94	7	288	116	55556	432	285	eno	6	297	EAW90376.1	14
3154	61.5741	48.12	244	1.56e-77	5	266	128	48120	432	425	eno	166	264	AAH04325.1	3
3155	61.3426	48.302	244	2.05e-77	5	265	127	48302	432	425	eno	167	261	AAC39935.1	1
3156	59.9537	47.49	233	2.16e-73	5	259	126	47490	432	425	eno	173	256	AAH21166.2	2
3157	74.0741	43.438	231	2.81e-72	8	320	121	43438	432	319	eno	6	270	BAG62358.1	5
3158	38.6574	59.88	196	2.23e-60	2	167	64	59880	432	200	eno	36	166	ABO65081.1	1
3159	41.2037	47.191	168	2.91e-49	2	178	88	47191	432	425	eno	252	176	AAH09218.2	1
3160	34.7222	55.333	166	9.06e-49	2	150	63	55333	432	426	eno	278	147	CAB94588.1	1
3161	51.8519	37.5	146	2.77e-39	3	224	131	37500	432	425	eno	206	327	AAA35698.1	109
3162	28.7037	54.839	131	7.66e-36	0	124	56	54839	432	425	eno	302	127	AAI13035.1	4
3163	78.2407	28.698	116	1.04e-27	11	338	204	28698	432	416	eno	110	333	EAW49439.1	2
3164	78.9352	28.739	117	2.18e-27	11	341	206	28739	432	416	eno	107	568	XP_006717898.1	234
3166	78.9352	28.739	117	3.22e-27	11	341	206	28739	432	416	eno	107	568	NP_001229628.1	234
3168	77.3148	25.449	97.1	1.3e-20	7	334	184	25449	432	416	eno	107	526	XP_011538099.1	234
3170	25.2315	37.615	64.7	6.24e-12	2	109	65	37615	432	166	eno	60	108	CCO13837.1	1
3171	15.7407	45.588	63.5	2.27e-11	1	68	35	45588	432	353	eno	286	100	EAX00715.1	35
3172	49.0741	29.245	66.2	1.37e-10	8	212	120	29245	432	291	eno	107	442	XP_016871730.1	234
3181	106.312	26.25	94.4	4.01e-21	4	320	187	26250	301	281	era	11	329	EAW51146.1	10
3182	106.312	26.25	94.4	9.86e-21	4	320	187	26250	301	281	era	11	442	AAG12978.1	123
3183	106.312	26.25	94.4	1.14e-20	4	320	187	26250	301	281	era	11	441	AAC31603.1	122
3184	106.312	26.25	94.4	1.18e-20	4	320	187	26250	301	281	era	11	435	BAB56112.1	116
3185	106.312	26.25	94	1.28e-20	4	320	187	26250	301	281	era	11	435	NP_005693.1	116
3186	106.312	26.25	89.7	4.23e-19	5	320	186	26250	301	281	era	11	434	NP_001304914.1	116
3187	92.3588	28.058	85.9	4.95e-18	6	278	152	28058	301	281	era	11	352	NP_001304915.1	116
3188	44.186	33.083	65.5	3.93e-11	2	133	82	33083	301	136	era	11	254	AAC31604.1	122
3189	44.186	33.083	65.1	4.02e-11	2	133	82	33083	301	136	era	11	248	EAW51149.1	116
3290	72.807	46.988	80.1	3.09e-19	1	83	43	46988	114	114	erpA	33	152	NP_919255.2	70
3291	72.807	46.988	80.1	3.22e-19	1	83	43	46988	114	114	erpA	33	156	CAD62580.1	74
3292	72.807	46.988	79.7	3.88e-19	1	83	43	46988	114	114	erpA	33	152	AAH32893.1	70
3293	72.807	45.783	77.8	2.06e-18	1	83	44	45783	114	114	erpA	33	152	AAH15771.2	70
3294	73.6842	46.429	76.3	7.6e-18	2	84	43	46429	114	114	erpA	33	153	EAW81179.1	70
3295	92.9825	33.019	69.7	1.92e-15	1	106	70	33019	114	114	erpA	9	130	AAG59854.1	26
3296	92.9825	33.019	69.3	2.16e-15	1	106	70	33019	114	114	erpA	9	129	NP_112202.2	25
3297	92.9825	33.019	69.3	4.03e-15	1	106	70	33019	114	114	erpA	9	149	CAD39021.1	45
3298	92.9825	33.019	68.9	8.37e-15	1	106	70	33019	114	114	erpA	9	176	EAW62713.1	72
3299	92.9825	30.189	61.6	2.3e-12	0	106	74	30189	114	114	erpA	9	130	EAW84894.1	25
3319	104.68	34.118	208	5.48e-62	13	425	251	34118	406	404	fabB	2	438	2IWY_A	21
3320	104.187	33.806	208	8.44e-62	11	423	255	33806	406	404	fabB	2	459	NP_060367.1	42
3321	104.187	33.57	204	2.47e-60	11	423	256	33570	406	404	fabB	2	444	2C9H_A	27
3322	44.8276	42.857	130	5.74e-35	6	182	92	42857	406	404	fabB	234	184	XP_006713280.1	4
3323	41.8719	39.412	100	1.4e-22	6	170	91	39412	406	404	fabB	246	376	NP_001138863.1	208
3325	83.2512	28.107	90.5	2.37e-18	15	338	207	28107	406	402	fabB	81	407	3HHD_A	90
3326	83.2512	28.107	90.1	4.01e-18	15	338	207	28107	406	402	fabB	81	405	EAW89745.1	88
3327	83.2512	28.107	89.7	4.31e-18	15	338	207	28107	406	402	fabB	81	405	NP_004095.4	88
3328	83.2512	28.107	89.7	4.39e-18	15	338	207	28107	406	402	fabB	81	405	AAH63242.1	88
3329	83.2512	28.107	89.7	4.51e-18	15	338	207	28107	406	402	fabB	81	405	AAA73576.1	88
3330	83.2512	28.107	89.7	4.64e-18	15	338	207	28107	406	402	fabB	81	405	AAS09886.1	88
3331	83.0049	26.706	80.9	3.98e-15	15	337	212	26706	406	402	fabB	81	404	AAC50259.1	88
3343	97.0874	34.333	149	1.39e-41	7	300	173	34333	309	286	fabD	6	323	2C2N_A	29
3344	97.0874	34.333	149	3.68e-41	7	300	173	34333	309	286	fabD	6	359	NP_775738.3	65
3345	97.0874	34.333	148	9.54e-41	7	300	173	34333	309	286	fabD	6	359	AAH42195.2	65
3346	62.7832	29.897	82.4	1.73e-17	3	194	124	29897	309	286	fabD	105	194	XP_011528458.1	1
3347	35.9223	42.342	77.8	3.68e-16	4	111	52	42342	309	109	fabD	6	170	NP_055322.1	65
3383	97.9508	41.841	189	6.34e-59	2	239	134	41841	244	244	fabG	6	236	NP_116172.2	3
3384	97.9508	41.841	188	8.59e-59	2	239	134	41841	244	244	fabG	6	236	AAH21973.1	3
3385	97.9508	41.841	188	9.12e-59	2	239	134	41841	244	244	fabG	6	243	4CQL_B	10
3386	102.049	40.161	181	9.86e-56	3	249	134	40161	244	244	fabG	6	246	XP_006714454.1	3
3387	102.049	38.153	172	5.89e-52	3	249	142	38153	244	243	fabG	7	261	AQY76863.2	13
3388	102.049	38.153	171	7.15e-52	3	249	142	38153	244	243	fabG	7	261	NP_055049.1	13
3389	102.049	38.153	171	9.06e-52	3	249	142	38153	244	243	fabG	7	257	2PD6_A	9
3390	102.049	38.153	170	2.67e-51	3	249	142	38153	244	243	fabG	7	259	BAA11529.1	11
3391	102.049	37.751	169	4.69e-51	3	249	143	37751	244	243	fabG	7	261	4CQM_D	13
3392	72.541	42.373	142	1.46e-41	0	177	102	42373	244	182	fabG	6	179	EAX04798.1	3
3393	72.541	42.373	142	1.87e-41	0	177	102	42373	244	182	fabG	6	179	BAB55045.1	3
3394	82.377	38.806	142	4.2e-41	1	201	122	38806	244	205	fabG	6	203	XP_005263372.1	3
3395	72.1311	42.045	140	1.64e-40	0	176	102	42045	244	181	fabG	6	178	XP_005263373.1	3
3396	86.4754	36.967	134	9.58e-38	2	211	122	36967	244	205	fabG	6	213	XP_016864271.1	3
3397	76.2295	39.785	132	1.8e-37	1	186	102	39785	244	181	fabG	6	188	XP_016864272.1	3
3398	76.2295	39.785	132	2.95e-37	1	186	102	39785	244	181	fabG	6	188	XP_006714455.1	3
3399	60.6557	43.243	120	2.78e-33	3	148	69	43243	244	244	fabG	107	147	XP_011530688.1	5
3400	98.7705	34.025	119	8.33e-32	4	241	153	34025	244	240	fabG	6	255	AAD02292.1	15
3401	77.8689	37.368	121	9.96e-32	1	190	110	37368	244	181	fabG	1	215	1ZBQ_A	26
3402	102.869	31.873	120	1.81e-31	5	251	156	31873	244	240	fabG	3	264	NP_060911.2	16
3403	98.7705	33.61	119	1.86e-31	4	241	154	33610	244	240	fabG	6	255	BAB18775.1	15
3404	98.7705	33.61	119	1.97e-31	4	241	154	33610	244	240	fabG	6	256	3O4R_A	16
3405	98.7705	33.61	119	2.21e-31	4	241	154	33610	244	240	fabG	6	273	NP_066284.2	33
3406	102.869	31.873	120	2.55e-31	5	251	156	31873	244	240	fabG	3	283	AAK14920.1	35
3407	98.7705	33.61	117	8.1e-31	4	241	154	33610	244	240	fabG	6	273	AAQ13444.1	33
3408	98.7705	33.195	117	1.08e-30	4	241	155	33195	244	240	fabG	6	273	BAA91953.1	33
3409	100.41	31.837	116	1.21e-30	4	245	154	31837	244	240	fabG	3	242	AAQ89200.1	4
3410	77.8689	37.368	121	2.27e-30	1	190	110	37368	244	181	fabG	1	194	BAG35356.1	5
3411	77.8689	37.368	121	2.52e-30	1	190	110	37368	244	181	fabG	1	194	NP_000405.1	5
3412	102.869	31.474	116	2.84e-30	5	251	157	31474	244	240	fabG	3	264	CAB89810.1	16
3413	100.41	31.429	114	4.74e-30	4	245	155	31429	244	240	fabG	3	242	AAH01953.1	4
3414	100.41	31.429	113	1.32e-29	4	245	155	31429	244	240	fabG	3	242	NP_064524.3	4
3415	100.41	31.429	113	1.49e-29	4	245	155	31429	244	240	fabG	3	242	2AG5_A	4
3416	100.41	31.02	112	5.07e-29	4	245	156	31020	244	240	fabG	3	242	AAH95414.1	4
3417	97.9508	30.126	110	7.79e-29	3	239	117	30126	244	244	fabG	6	191	XP_011530687.1	3
3418	100.41	31.02	110	2.5e-28	4	245	156	31020	244	240	fabG	3	242	BAF82849.1	4
3419	103.689	30.83	110	1.39e-27	6	253	158	30830	244	240	fabG	3	285	EAW70557.1	35
3420	106.148	30.116	107	3.92e-27	5	259	154	30116	244	240	fabG	3	256	XP_006714337.1	4
3421	98.7705	31.12	106	5.73e-27	5	241	158	31120	244	242	fabG	5	241	AAH03018.1	6
3422	98.7705	31.12	106	5.98e-27	5	241	158	31120	244	242	fabG	5	242	NP_057370.1	7
3423	103.689	30.435	106	8.17e-27	4	253	161	30435	244	243	fabG	4	259	1U7T_A	9
3424	98.7705	31.12	106	1e-26	5	241	158	31120	244	242	fabG	5	242	3D3W_A	7
3425	98.7705	30.705	104	3.16e-26	5	241	159	30705	244	242	fabG	5	242	AAP97273.1	7
3426	98.7705	33.195	105	5.46e-26	4	241	155	33195	244	240	fabG	6	273	EAW66124.1	33
3427	103.689	30.04	103	1.08e-25	4	253	162	30040	244	243	fabG	4	259	NP_004484.1	9
3428	103.689	30.04	103	1.12e-25	4	253	162	30040	244	243	fabG	4	261	2O23_A	11
3429	85.6557	33.971	103	1.27e-25	6	209	120	33971	244	199	fabG	1	201	NP_000851.2	1
3430	99.1803	30.992	102	1.59e-25	6	242	158	30992	244	242	fabG	5	243	3D3W_B	7
3431	85.6557	32.057	103	2.32e-25	5	209	124	32057	244	199	fabG	1	201	AAA89174.1	1
3432	80.7377	33.503	106	3.82e-25	4	197	90	33503	244	181	fabG	1	176	BAG62787.1	5
3433	80.7377	33.503	105	6.72e-25	4	197	90	33503	244	181	fabG	1	176	NP_001186221.1	5
3434	84.0164	32.195	101	1.08e-24	5	205	121	32195	244	199	fabG	5	203	2GDZ_A	7
3435	78.6885	31.25	100	1.55e-24	2	192	126	31250	244	190	fabG	5	222	1YB1_A	31
3436	78.6885	30.729	101	2.24e-24	2	192	127	30729	244	190	fabG	5	227	NP_835236.2	36
3437	78.6885	30.729	101	2.26e-24	2	192	127	30729	244	190	fabG	5	227	AAO72313.1	36
3438	78.6885	31.25	100	2.93e-24	2	192	126	31250	244	190	fabG	5	227	Q8NBQ5.3	36
3439	78.6885	31.25	100	3.56e-24	2	192	126	31250	244	190	fabG	5	227	NP_057329.3	36
3440	77.8689	35.263	103	4.13e-24	2	190	95	35263	244	181	fabG	1	175	BAG56786.1	5
3441	98.7705	30.705	98.6	6.71e-24	6	241	157	30705	244	242	fabG	5	240	NP_001182147.1	7
3442	79.918	30.769	99.4	9.03e-24	2	195	129	30769	244	193	fabG	5	230	AAH08650.1	36
3443	47.1311	43.478	102	1.32e-23	0	115	65	43478	244	181	fabG	67	170	BAG61592.1	56
3444	77.0492	31.383	98.6	2.04e-23	2	188	123	31383	244	186	fabG	5	223	BAC11560.1	36
3445	102.049	30.522	97.8	2.36e-23	7	249	158	30522	244	243	fabG	6	272	4FC6_A	28
3446	47.1311	43.478	100	2.58e-23	0	115	65	43478	244	181	fabG	67	219	NP_001186220.1	105
3447	47.1311	43.478	100	2.66e-23	0	115	65	43478	244	181	fabG	67	219	BAG60363.1	105
3448	47.1311	43.478	100	2.67e-23	0	115	65	43478	244	181	fabG	67	170	NP_001278956.1	56
3449	100	31.148	97.4	3.31e-23	4	244	159	31148	244	240	fabG	6	276	P0CG22.1	33
3450	102.049	30.522	97.8	3.6e-23	7	249	158	30522	244	243	fabG	6	273	NP_065715.1	29
3451	99.5902	30.041	97.4	3.72e-23	6	243	157	30041	244	239	fabG	6	275	BAD96577.1	37
3452	91.8033	32.143	97.1	4.04e-23	8	224	132	32143	244	240	fabG	29	248	6G4L_A	33
3453	91.8033	32.143	97.1	4.08e-23	8	224	132	32143	244	240	fabG	29	248	NP_057330.2	33
3454	91.8033	32.143	97.1	4.21e-23	8	224	132	32143	244	240	fabG	29	248	6GBT_A	33
3455	91.8033	32.143	97.1	4.48e-23	8	224	132	32143	244	240	fabG	29	248	1YDE_A	33
3456	91.8033	32.143	97.1	4.71e-23	8	224	132	32143	244	240	fabG	29	250	6HNO_A	35
3457	91.8033	32.143	97.1	4.91e-23	8	224	132	32143	244	240	fabG	29	250	5HS6_A	35
3458	91.8033	32.143	97.1	5.07e-23	8	224	132	32143	244	240	fabG	29	250	5ICS_A	35
3459	97.541	31.092	95.5	9.91e-23	5	238	130	31092	244	240	fabG	6	239	NP_001269917.1	33
3460	91.8033	32.143	96.3	1.05e-22	8	224	132	32143	244	240	fabG	29	250	6FFB_A	35
3461	81.1475	30.808	95.9	1.69e-22	2	198	116	30808	244	189	fabG	7	245	XP_024306453.1	54
3462	99.5902	29.63	95.5	2.03e-22	6	243	158	29630	244	239	fabG	6	275	NP_005785.1	37
3463	99.5902	29.63	95.1	2.13e-22	6	243	158	29630	244	239	fabG	6	266	AAH07339.2	28
3464	86.8852	30.189	95.9	2.58e-22	3	212	125	30189	244	201	fabG	7	259	CAB55997.1	54
3465	86.8852	30.189	95.5	2.95e-22	3	212	125	30189	244	201	fabG	7	244	NP_001317088.1	39
3466	86.8852	30.189	95.1	2.99e-22	3	212	125	30189	244	201	fabG	7	264	AAD34088.1	59
3467	91.8033	31.696	94.7	3.24e-22	8	224	133	31696	244	240	fabG	29	248	6H0M_A	33
3468	77.8689	30.526	95.1	3.6e-22	2	190	124	30526	244	188	fabG	7	191	NP_001309209.1	2
3469	88.9344	28.571	95.9	3.98e-22	3	217	124	28571	244	190	fabG	5	252	NP_742034.1	36
3470	86.8852	30.189	95.5	4e-22	3	212	125	30189	244	201	fabG	7	259	CAG33405.1	54
3471	86.8852	30.189	95.5	4.21e-22	3	212	125	30189	244	201	fabG	7	259	NP_056325.2	54
3472	81.1475	30.808	95.5	4.24e-22	2	198	116	30808	244	189	fabG	7	292	XP_011522088.1	101
3473	86.8852	30.189	95.5	4.52e-22	3	212	125	30189	244	201	fabG	7	265	EAX02597.1	60
3474	77.8689	30.526	94.7	8.83e-22	2	190	124	30526	244	188	fabG	7	241	NP_057113.1	52
3475	86.8852	30.189	95.1	9.85e-22	3	212	125	30189	244	201	fabG	7	306	XP_005256652.2	101
3476	77.8689	30.526	95.1	1.33e-21	2	190	124	30526	244	188	fabG	7	241	XP_016876857.1	52
3477	77.8689	30.526	94.7	1.52e-21	2	190	124	30526	244	188	fabG	7	241	CAH56402.1	52
3478	101.23	27.935	92.8	2.96e-21	3	247	170	27935	244	240	fabG	2	269	1W6U_A	23
3479	101.23	27.935	93.2	3.23e-21	3	247	170	27935	244	240	fabG	2	293	XP_011515182.1	47
3480	101.23	27.935	93.2	3.29e-21	3	247	170	27935	244	240	fabG	2	293	NP_001317504.1	47
3481	101.23	27.935	92.8	4e-21	3	247	170	27935	244	240	fabG	2	302	NP_001350.1	56
3482	74.5902	35.165	89	6.8e-21	5	182	102	35165	244	174	fabG	1	174	NP_001139288.1	1
3483	74.5902	35.165	88.2	1.45e-20	5	182	102	35165	244	174	fabG	1	174	CAA57843.1	1
3484	97.9508	28.87	88.6	2.29e-20	4	239	132	28870	244	240	fabG	3	205	EAX06168.1	4
3485	83.1967	28.571	89	3.22e-20	2	203	141	28571	244	240	fabG	42	210	XP_005250865.1	8
3486	99.1803	31.405	89	3.25e-20	7	242	124	31405	244	240	fabG	6	239	XP_006720309.1	33
3487	84.4262	30.583	89.7	4.85e-20	3	206	138	30583	244	205	fabG	5	251	AAK15047.1	46
3488	84.4262	30.583	89.7	4.95e-20	3	206	138	30583	244	205	fabG	5	272	BAC11262.1	67
3489	102.869	27.888	89.4	4.98e-20	4	251	165	27888	244	240	fabG	2	269	1W73_A	23
3490	84.4262	30.583	89.7	5.2e-20	3	206	138	30583	244	205	fabG	5	272	NP_113651.4	67
3491	79.5082	28.866	89	6.99e-20	2	194	131	28866	244	188	fabG	2	230	BAB91014.1	37
3492	101.23	27.126	89	1.26e-19	3	247	172	27126	244	240	fabG	2	302	AAB09423.1	56
3493	103.689	28.063	87.4	1.39e-19	5	253	158	28063	244	243	fabG	4	250	NP_001032900.1	9
3494	55.7377	35.294	86.7	1.43e-19	1	136	86	35294	244	240	fabG	107	211	ADD92526.1	76
3495	79.5082	28.866	88.2	1.48e-19	2	194	131	28866	244	188	fabG	2	230	NP_001304978.1	37
3496	84.4262	30.097	88.6	1.62e-19	3	206	139	30097	244	205	fabG	5	272	AAI04220.1	67
3497	79.5082	28.866	88.2	1.65e-19	2	194	131	28866	244	188	fabG	2	230	NP_620419.2	37
3498	91.8033	31.25	86.7	2.46e-19	8	224	123	31250	244	240	fabG	29	237	EAW52404.1	33
3499	84.4262	30.097	87.4	3.52e-19	3	206	139	30097	244	205	fabG	5	272	AAH18084.2	67
3500	77.459	29.63	86.3	3.7e-19	3	189	97	29630	244	190	fabG	5	191	NP_001129702.1	36
3501	56.5574	33.333	82.8	7.79e-19	2	138	85	33333	244	240	fabG	110	141	BAG62318.1	4
3502	88.5246	29.63	84.7	7.94e-19	5	216	144	29630	244	217	fabG	5	217	EAW89732.1	7
3503	40.9836	42	81.6	8.37e-19	1	100	57	42000	244	205	fabG	107	104	BAG61709.1	5
3504	83.6066	30.392	85.1	8.52e-19	6	204	128	30392	244	243	fabG	50	225	AAH11968.1	26
3505	79.0984	29.016	84.7	1.3e-18	5	193	128	29016	244	189	fabG	2	214	XP_024305017.1	26
3506	79.0984	29.016	84.7	2.94e-18	5	193	128	29016	244	189	fabG	2	214	NP_003716.2	26
3507	78.2787	27.749	83.2	3.58e-18	2	191	131	27749	244	185	fabG	2	227	BAB71545.1	37
3508	79.0984	29.016	84.3	3.7e-18	5	193	128	29016	244	189	fabG	2	214	BAG36215.1	26
[truncated: 4,694 more rows]

## Sheet: Under cut-off
	% alignment	% id	bitscore	evalue	gapopen	length	mismatch	pident	prot length	qend	qseqid	qstart	send	sseqid	sstart
0	50.1567	30	57	5.65e-08	4	160	94	30000	319	239	accA	85	382	BAH13894.1	236
1	38.8715	33.065	53.5	8.9e-08	3	124	70	33065	319	208	accA	85	150	AAA60036.1	40
2	50.1567	29.375	54.7	3.03e-07	4	160	95	29375	319	239	accA	85	494	NP_001171485.1	348
3	50.1567	29.375	54.7	3.17e-07	4	160	95	29375	319	239	accA	85	494	ANZ79615.1	348
4	50.1567	29.375	54.7	3.26e-07	4	160	95	29375	319	239	accA	85	474	AAB28900.1	328
5	50.1567	29.375	54.7	3.29e-07	4	160	95	29375	319	239	accA	85	474	CAA51825.1	328
6	50.1567	29.375	54.7	3.38e-07	4	160	95	29375	319	239	accA	85	474	NP_000523.2	328
7	50.1567	29.375	54.3	4.82e-07	4	160	95	29375	319	239	accA	85	480	BAD92246.1	334
8	29.7806	32.632	47.4	4.27e-05	2	95	52	32632	319	179	accA	85	266	AAG17227.1	184
9	29.7806	32.632	47.4	5.42e-05	2	95	52	32632	319	179	accA	85	327	BAH13735.1	245
10	32.2884	30.097	44.3	0.000225	2	103	66	30097	319	239	accA	142	121	AAH18013.1	20
11	41.0658	25.954	36.2	0.27	3	131	75	25954	319	213	accA	83	414	NP_001350076.1	306
12	41.0658	25.954	35.4	0.4	3	131	75	25954	319	213	accA	83	452	NP_071415.1	344
13	44.2006	24.823	31.2	8.5	3	141	91	24823	319	216	accA	83	229	NP_071415.1	97
14	41.0658	25.954	35.4	0.46	3	131	75	25954	319	213	accA	83	321	EAW95692.1	213
15	44.2006	24.823	33.1	2.1	3	141	91	24823	319	216	accA	83	229	XP_016865177.1	97
16	44.2006	24.823	32.7	2.5	3	141	91	24823	319	216	accA	83	229	XP_011541831.1	97
17	19.1223	27.869	32.7	4	1	61	41	27869	319	281	accA	221	11649	XP_016860308.1	11592
18	19.1223	27.869	32.7	4.1	1	61	41	27869	319	281	accA	221	11607	EAX11013.1	11550
19	44.2006	24.823	32	4.5	3	141	91	24823	319	216	accA	83	229	ALQ34200.1	97
20	26.0188	25.301	31.6	4.9	1	83	59	25301	319	216	accA	137	98	BAG52236.1	16
21	45.1411	23.611	32	6.6	4	144	84	23611	319	305	accA	185	2152	Q8NDH2.2	2012
22	45.1411	23.611	32	6.8	4	144	84	23611	319	305	accA	185	6741	XP_011519408.1	6601
23	45.1411	23.611	32	6.9	4	144	84	23611	319	305	accA	185	6629	EAX09063.1	6489
24	45.1411	23.611	32	6.9	4	144	84	23611	319	305	accA	185	6781	NP_001139669.1	6641
25	46.1538	37.5	48.5	3.95e-07	1	72	38	37500	156	156	accB	85	83	2EJM_A	19
26	46.1538	36.111	47	1.49e-06	1	72	44	36111	156	156	accB	87	94	2JKU_A	23
27	46.1538	37.5	49.3	1.97e-06	1	72	38	37500	156	156	accB	85	598	NP_001280202.1	534
28	46.1538	37.5	48.9	2.21e-06	1	72	38	37500	156	156	accB	85	731	BAD92974.1	667
29	46.1538	37.5	48.9	2.24e-06	1	72	38	37500	156	156	accB	85	715	NP_064551.3	651
30	46.1538	37.5	48.9	2.47e-06	1	72	38	37500	156	156	accB	85	715	AAG50245.1	651
31	46.1538	37.5	48.9	2.47e-06	1	72	38	37500	156	156	accB	85	715	AAK67986.1	651
32	46.1538	37.5	48.9	2.8e-06	1	72	38	37500	156	156	accB	85	677	XP_011511294.1	613
33	46.1538	37.5	48.5	2.96e-06	1	72	38	37500	156	156	accB	85	565	CAH18403.1	501
34	46.1538	37.5	48.5	3.09e-06	1	72	38	37500	156	156	accB	85	606	NP_001350809.1	542
35	44.2308	36.232	44.7	9.28e-06	1	69	42	36232	156	156	accB	90	96	AAA36424.1	28
36	42.3077	37.879	45.1	4.66e-05	1	66	39	37879	156	156	accB	93	501	EAX09032.1	436
37	42.3077	37.879	45.1	5.31e-05	1	66	39	37879	156	156	accB	93	680	NP_001339535.1	615
38	42.3077	37.879	45.1	5.33e-05	1	66	39	37879	156	156	accB	93	654	NP_001339537.1	589
39	42.3077	37.879	45.1	5.75e-05	1	66	39	37879	156	156	accB	93	702	BAG59350.1	637
40	42.3077	37.879	44.7	5.76e-05	1	66	39	37879	156	156	accB	93	413	NP_001339539.1	348
41	42.3077	37.879	45.1	5.81e-05	1	66	39	37879	156	156	accB	93	702	NP_001121164.1	637
42	42.3077	37.879	45.1	5.82e-05	1	66	39	37879	156	156	accB	93	710	NP_001339534.1	645
43	42.3077	37.879	44.7	5.83e-05	1	66	39	37879	156	156	accB	93	365	NP_001339541.1	300
44	42.3077	37.879	45.1	5.84e-05	1	66	39	37879	156	156	accB	93	728	NP_000273.2	663
45	42.3077	37.879	44.7	6.14e-05	1	66	39	37879	156	156	accB	93	395	NP_001339540.1	330
46	42.3077	37.879	44.7	6.38e-05	1	66	39	37879	156	156	accB	93	695	XP_016876098.1	630
47	42.3077	37.879	44.7	6.51e-05	1	66	39	37879	156	156	accB	93	703	CAA32763.1	638
48	42.3077	37.879	44.7	6.7e-05	1	66	39	37879	156	156	accB	93	703	BAG37887.1	638
49	33.3333	40.385	43.1	0.00024	0	52	31	40385	156	156	accB	105	681	NP_001171475.1	630
50	33.3333	40.385	43.1	0.00025	0	52	31	40385	156	156	accB	105	681	BAG60571.1	630
51	33.3333	40.385	43.1	0.000251	0	52	31	40385	156	156	accB	105	655	NP_001339536.1	604
52	32.6923	35.294	32.3	0.33	0	51	33	35294	156	156	accB	106	96	AAA36423.1	46
53	32.6923	35.294	33.9	0.34	0	51	33	35294	156	156	accB	106	718	3BG9_A	668
54	32.6923	35.294	33.9	0.34	0	51	33	35294	156	156	accB	106	718	3BG3_A	668
55	32.6923	35.294	33.9	0.35	0	51	33	35294	156	156	accB	106	746	XP_011543389.1	696
56	32.6923	35.294	33.9	0.35	0	51	33	35294	156	156	accB	106	1178	NP_071504.2	1128
57	32.6923	35.294	33.9	0.35	0	51	33	35294	156	156	accB	106	1178	AAB31500.1	1128
58	32.6923	35.294	33.9	0.36	0	51	33	35294	156	156	accB	106	1178	AAA82937.1	1128
59	32.6923	35.294	33.9	0.36	0	51	33	35294	156	156	accB	106	671	XP_006718642.1	621
60	62.1795	31.959	32.7	0.78	5	97	59	31959	156	121	accB	25	325	AAA57261.1	236
61	32.6923	37.255	31.2	2.2	2	51	30	37255	156	112	accB	63	74	AAQ88624.1	25
62	62.1795	31.959	31.2	2.5	5	97	59	31959	156	121	accB	25	990	CAA57709.1	901
63	62.1795	31.959	31.2	2.5	5	97	59	31959	156	121	accB	25	991	EAW70039.1	902
64	62.1795	31.959	31.2	2.5	5	97	59	31959	156	121	accB	25	991	NP_002499.2	902
65	86.5385	24.444	31.2	2.5	3	135	72	24444	156	143	accB	9	118	AAB66315.1	14
66	62.1795	31.959	31.2	2.5	5	97	59	31959	156	121	accB	25	990	BAD92685.1	901
67	62.1795	31.959	31.2	2.5	5	97	59	31959	156	121	accB	25	991	AAA59932.1	902
68	28.2051	34.091	30.8	2.7	0	44	29	34091	156	143	accB	100	65	1ZY8_K	22
69	62.1795	31.959	31.2	3.1	5	97	59	31959	156	121	accB	25	949	XP_011542497.1	860
70	62.1795	31.959	30.8	3.4	5	97	59	31959	156	121	accB	25	858	AAH45606.1	769
71	62.1795	31.959	30.8	3.5	5	97	59	31959	156	121	accB	25	858	EAW70041.1	769
72	28.2051	34.091	30.8	3.7	0	44	29	34091	156	143	accB	100	103	NP_001128496.1	60
73	24.359	36.842	30.8	3.8	0	38	24	36842	156	143	accB	106	58	XP_011518692.1	21
74	24.359	36.842	30.4	4.1	0	38	24	36842	156	143	accB	106	118	AAH10389.1	81
75	24.359	36.842	30.4	4.2	0	38	24	36842	156	143	accB	106	118	BAG35370.1	81
76	28.2051	34.091	30.4	4.2	0	44	29	34091	156	143	accB	100	118	AAC39661.1	75
77	24.359	36.842	30.4	4.2	0	38	24	36842	156	143	accB	106	118	NP_003468.2	81
78	24.359	36.842	30.4	4.2	0	38	24	36842	156	143	accB	106	118	CAA73606.1	81
79	25	35.897	28.9	5.3	0	39	25	35897	156	144	accB	106	70	2DNC_A	32
80	26.9231	33.333	27.7	6.4	0	42	28	33333	156	156	accB	115	44	AAA60033.1	3
81	46.1538	30.556	29.6	9.7	2	72	48	30556	156	80	accB	11	1200	AAS18315.1	1129
159	40.3118	20.994	49.3	4.9e-05	2	181	138	20994	449	319	accC	140	1245	BAA11423.1	1069
160	51.8931	24.893	63.2	2.39e-09	6	233	154	24893	449	321	accC	97	641	AAY24293.1	422
161	40.3118	20.994	48.9	6.78e-05	2	181	138	20994	449	319	accC	140	1171	AAY24293.1	995
162	51.8931	24.893	62.8	2.53e-09	6	233	154	24893	449	321	accC	97	715	NP_004332.2	496
163	40.3118	20.994	48.9	6.8e-05	2	181	138	20994	449	319	accC	140	1245	NP_004332.2	1069
164	31.1804	27.143	52.4	5.26e-06	3	140	91	27143	449	234	accC	97	626	NP_001293008.1	496
165	40.3118	20.994	48.9	6.44e-05	2	181	138	20994	449	319	accC	140	1182	NP_001293008.1	1006
166	31.1804	27.143	52	6.26e-06	3	140	91	27143	449	234	accC	97	626	XP_006712164.1	496
167	40.3118	20.994	48.5	7.09e-05	2	181	138	20994	449	319	accC	140	1182	XP_006712164.1	1006
168	40.3118	20.994	48.5	7.34e-05	2	181	138	20994	449	319	accC	140	487	XP_024308899.1	311
169	38.9755	22.286	38.9	0.066	4	175	127	22286	449	319	accC	148	492	CAE45707.1	324
170	40.7572	21.311	38.9	0.071	4	183	135	21311	449	319	accC	140	1286	BAF82438.1	1110
171	40.3118	23.757	38.9	0.074	5	181	120	23757	449	321	accC	149	747	BAF82438.1	577
172	38.9755	22.286	38.9	0.074	4	175	127	22286	449	319	accC	148	835	AAP84318.1	667
173	40.3118	22.652	38.5	0.094	4	181	122	22652	449	321	accC	149	296	AAP84318.1	126
174	40.7572	21.311	38.9	0.078	4	183	135	21311	449	319	accC	140	1296	BAD92037.1	1120
175	39.4209	23.164	38.1	0.12	3	177	126	23164	449	321	accC	149	757	BAD92037.1	587
176	38.9755	22.286	38.9	0.08	4	175	127	22286	449	319	accC	148	1275	5DOT_A	1107
177	39.4209	23.164	38.1	0.11	3	177	126	23164	449	321	accC	149	736	5DOT_A	566
178	40.7572	21.311	38.9	0.08	4	183	135	21311	449	319	accC	140	1297	NP_001356185.1	1121
179	39.4209	23.164	38.1	0.13	3	177	126	23164	449	321	accC	149	758	NP_001356185.1	588
180	40.7572	21.311	38.9	0.083	4	183	135	21311	449	319	accC	140	1286	NP_001866.2	1110
181	39.4209	23.164	38.1	0.12	3	177	126	23164	449	321	accC	149	747	NP_001866.2	577
182	39.4209	23.164	38.5	0.11	3	177	126	23164	449	321	accC	149	747	BAD74209.1	577
183	40.7572	20.765	35.8	0.62	4	183	136	20765	449	319	accC	140	1286	BAD74209.1	1110
184	39.4209	23.164	38.5	0.11	3	177	126	23164	449	321	accC	149	747	BAD74207.1	577
185	40.7572	20.765	35.8	0.64	4	183	136	20765	449	319	accC	140	1286	BAD74207.1	1110
186	39.4209	23.164	38.1	0.11	3	177	126	23164	449	321	accC	149	747	BAD74206.1	577
187	39.4209	23.164	38.1	0.11	3	177	126	23164	449	321	accC	149	747	BAD74205.1	577
188	40.7572	20.765	35.8	0.68	4	183	136	20765	449	319	accC	140	1286	BAD74205.1	1110
189	39.4209	23.164	38.1	0.11	3	177	126	23164	449	321	accC	149	747	EAW70493.1	577
190	40.7572	21.311	37.7	0.16	4	183	135	21311	449	319	accC	140	1286	EAW70493.1	1110
191	6.23608	46.429	33.1	0.14	0	28	15	46429	449	330	accC	303	28	AAB25345.1	1
192	39.4209	23.164	37.7	0.14	3	177	126	23164	449	321	accC	149	747	BAD74208.1	577
193	39.4209	22.599	37.4	0.25	3	177	127	22599	449	321	accC	149	747	BAA14328.1	577
194	40.7572	20.765	36.6	0.37	4	183	136	20765	449	319	accC	140	1286	BAA14328.1	1110
195	11.1359	34	33.5	0.72	1	50	32	34000	449	407	accC	358	87	AGP00960.1	39
196	11.1359	36	33.1	1.3	1	50	31	36000	449	407	accC	358	79	ADM44309.1	31
197	7.7951	40	30.4	3.8	0	35	21	40000	449	394	accC	360	39	AAC50864.1	5
198	10.245	32.609	30	4.7	0	46	31	32609	449	407	accC	362	65	AIZ70829.1	20
199	8.24053	43.243	30.8	5.6	1	37	20	43243	449	394	accC	358	77	CAL04346.1	42
200	10.6904	33.333	30	5.7	0	48	32	33333	449	407	accC	360	52	AAC50867.1	5
201	11.1359	34	30	6.4	1	50	32	34000	449	407	accC	358	54	CAD19271.1	6
202	11.1359	34	29.6	6.6	1	50	32	34000	449	407	accC	358	54	CAD19241.1	6
203	11.1359	34	30.4	7.7	1	50	32	34000	449	407	accC	358	87	AXA12438.1	39
204	11.1359	32	30	8	1	50	33	32000	449	407	accC	358	59	AIE57450.1	11
205	11.1359	34	30	9.6	1	50	32	34000	449	407	accC	358	62	ADA54640.1	14
206	10.6904	33.333	30.4	9.9	0	48	32	33333	449	407	accC	360	87	APZ84939.1	40
207	10.6904	33.333	30.4	9.9	0	48	32	33333	449	407	accC	360	87	APZ84906.1	40
208	10.6904	33.333	30.4	9.9	0	48	32	33333	449	407	accC	360	87	APZ84915.1	40
209	10.6904	33.333	30.4	9.9	0	48	32	33333	449	407	accC	360	87	APZ84871.1	40
216	65.4605	26.633	60.8	2.81e-09	6	199	133	26633	304	241	accD	54	259	ANZ79615.1	63
217	65.4605	26.633	60.8	2.97e-09	6	199	133	26633	304	241	accD	54	259	NP_001171485.1	63
218	48.0263	26.712	56.2	7.27e-08	2	146	104	26712	304	241	accD	97	156	BAH13735.1	13
219	31.9079	28.866	40.4	0.008	2	97	66	28866	304	241	accD	146	95	AAG17227.1	1
220	42.1053	23.438	33.1	2.2	1	128	95	23438	304	241	accD	117	255	XP_011541831.1	128
221	42.1053	23.438	32.7	2.5	1	128	95	23438	304	241	accD	117	255	ALQ34200.1	128
222	42.1053	23.438	32.7	2.7	1	128	95	23438	304	241	accD	117	255	XP_016865177.1	128
223	36.1842	26.364	32.3	3.5	5	110	60	26364	304	226	accD	127	189	NP_057290.2	91
224	36.1842	26.364	32.3	3.7	5	110	60	26364	304	226	accD	127	188	XP_006713201.1	90
225	37.5	24.561	31.6	4.3	1	114	83	24561	304	241	accD	131	124	BAG52236.1	11
226	36.1842	26.364	31.6	5.5	5	110	60	26364	304	226	accD	127	189	NP_001307422.1	91
227	37.5	24.561	31.6	6.2	1	114	83	24561	304	241	accD	131	255	NP_071415.1	142
228	37.5	24.561	31.2	8.3	1	114	83	24561	304	241	accD	131	124	EAW95692.1	11
230	10.7937	33.824	41.2	0.018	1	68	43	33824	630	68	aceF	3	127	AAA35589.1	60
231	9.20635	36.207	39.7	0.048	0	58	37	36207	630	171	aceF	114	127	AAA35589.1	70
233	10.7937	33.824	41.2	0.017	1	68	43	33824	630	68	aceF	3	132	NP_001909.3	65
234	9.20635	36.207	39.7	0.048	0	58	37	36207	630	171	aceF	114	132	NP_001909.3	75
236	10.7937	33.824	41.2	0.018	1	68	43	33824	630	68	aceF	3	127	AAA64512.1	60
237	9.20635	36.207	39.7	0.049	0	58	37	36207	630	171	aceF	114	127	AAA64512.1	70
272	8.73016	38.182	39.3	0.069	0	55	34	38182	630	282	aceF	228	147	AAB59629.1	93
273	7.30159	36.957	35.8	0.8	0	46	29	36957	630	69	aceF	24	138	AAB59629.1	93
274	8.73016	32.727	34.7	1.8	0	55	37	32727	630	181	aceF	127	147	AAB59629.1	93
276	8.73016	38.182	39.3	0.073	0	55	34	38182	630	282	aceF	228	147	NP_001924.2	93
277	7.30159	36.957	35.8	0.83	0	46	29	36957	630	69	aceF	24	138	NP_001924.2	93
278	8.73016	32.727	34.7	1.9	0	55	37	32727	630	181	aceF	127	147	NP_001924.2	93
280	8.73016	38.182	39.3	0.074	0	55	34	38182	630	282	aceF	228	147	CAG33008.1	93
281	8.73016	32.727	34.7	1.9	0	55	37	32727	630	181	aceF	127	147	CAG33008.1	93
283	8.73016	38.182	39.3	0.074	0	55	34	38182	630	282	aceF	228	147	BAA05536.1	93
284	7.14286	37.778	35.8	0.83	0	45	28	37778	630	68	aceF	24	137	BAA05536.1	93
285	8.73016	32.727	34.7	1.9	0	55	37	32727	630	181	aceF	127	147	BAA05536.1	93
287	8.73016	38.182	39.3	0.061	0	55	34	38182	630	282	aceF	228	147	BAA03871.1	93
288	7.14286	37.778	36.2	0.69	0	45	28	37778	630	68	aceF	24	137	BAA03871.1	93
289	8.73016	32.727	34.7	1.6	0	55	37	32727	630	181	aceF	127	147	BAA03871.1	93
292	8.73016	34.545	35.4	1.1	0	55	36	34545	630	282	aceF	228	146	AAB31066.1	92
293	7.30159	34.783	32.7	7.1	0	46	30	34783	630	69	aceF	24	137	AAB31066.1	92
300	10.7937	33.824	41.2	0.014	1	68	43	33824	630	68	aceF	3	127	AAA59200.1	60
301	9.20635	36.207	39.7	0.038	0	58	37	36207	630	171	aceF	114	127	AAA59200.1	70
302	14.127	33.708	56.6	1.04e-07	1	89	58	33708	630	514	aceF	426	251	CAD62604.1	164
303	6.19048	48.718	44.3	5.4e-05	0	39	20	48718	630	367	aceF	329	56	2COO_A	18
304	5.87302	51.351	43.5	8.57e-05	0	37	18	51351	630	365	aceF	329	46	1ZWV_A	10
305	6.19048	46.154	41.6	0.000438	0	39	21	46154	630	367	aceF	329	48	3RNM_E	10
306	12.5397	35.443	42.4	0.000507	1	79	49	35443	630	282	aceF	206	82	1K8O_A	4
307	10.7937	33.824	38.5	0.013	1	68	43	33824	630	68	aceF	3	72	1K8O_A	5
308	10.3175	33.846	37.4	0.027	0	65	43	33846	630	178	aceF	114	79	1K8O_A	15
309	8.88889	37.5	40.4	0.008	0	56	35	37500	630	283	aceF	228	148	NP_001231812.1	93
310	8.88889	32.143	37.7	0.073	0	56	38	32143	630	79	aceF	24	148	NP_001231812.1	93
311	8.73016	32.727	36.6	0.2	0	55	37	32727	630	181	aceF	127	147	NP_001231812.1	93
312	8.73016	38.182	39.7	0.039	0	55	34	38182	630	282	aceF	228	130	CAD66581.1	76
313	7.14286	37.778	35.4	0.74	0	45	28	37778	630	68	aceF	24	120	CAD66581.1	76
314	8.73016	32.727	35	1.1	0	55	37	32727	630	181	aceF	127	130	CAD66581.1	76
315	24.2857	23.529	34.3	1.6	2	153	114	23529	630	366	aceF	217	168	1ZY8_K	16
316	9.36508	33.898	31.6	3.3	0	59	39	33898	630	178	aceF	120	94	2JKU_A	36
317	9.36508	35.593	30.8	5.4	0	59	38	35593	630	279	aceF	221	94	2JKU_A	36
318	27.9365	24.432	33.9	3.7	4	176	107	24432	630	279	aceF	111	710	NP_001339534.1	554
319	9.36508	30.508	31.2	4.6	0	59	41	30508	630	178	aceF	120	83	2EJM_A	25
320	6.50794	39.024	30.4	9.7	0	41	25	39024	630	57	aceF	17	65	2EJM_A	25
321	27.9365	24.432	33.1	5	4	176	107	24432	630	279	aceF	111	395	NP_001339540.1	239
322	9.36508	33.898	32.7	7.7	0	59	39	33898	630	178	aceF	120	501	EAX09032.1	443
323	15.2381	32.292	32.7	8.1	3	96	57	32292	630	95	aceF	4	328	XP_011512899.1	237
324	15.2381	32.292	32.7	8.5	3	96	57	32292	630	95	aceF	4	328	NP_001010903.3	237
325	9.36508	33.898	32.7	9.1	0	59	39	33898	630	178	aceF	120	702	BAG59350.1	644
326	9.36508	33.898	32.3	9.4	0	59	39	33898	630	178	aceF	120	702	NP_001121164.1	644
327	9.36508	33.898	32.3	9.6	0	59	39	33898	630	178	aceF	120	680	NP_001339535.1	622
328	9.36508	33.898	32.3	9.6	0	59	39	33898	630	178	aceF	120	654	NP_001339537.1	596
329	9.36508	33.898	32.3	9.6	0	59	39	33898	630	178	aceF	120	728	NP_000273.2	670
337	61.5385	41.667	45.1	1.73e-06	0	48	28	41667	78	51	acpP	4	123	ABO65076.1	76
338	62.8205	34.694	31.6	0.26	0	49	32	34694	78	64	acpP	16	2183	EAW89745.1	2135
339	62.8205	34.694	31.6	0.28	0	49	32	34694	78	64	acpP	16	2183	AAH63242.1	2135
340	62.8205	34.694	31.6	0.28	0	49	32	34694	78	64	acpP	16	2183	NP_004095.4	2135
341	62.8205	34.694	31.6	0.28	0	49	32	34694	78	64	acpP	16	2181	AAA73576.1	2133
342	62.8205	34.694	31.6	0.28	0	49	32	34694	78	64	acpP	16	2183	AAS09886.1	2135
343	62.8205	34.694	31.2	0.41	0	49	32	34694	78	64	acpP	16	602	AAH07267.1	554
344	65.3846	45.098	31.2	0.43	3	51	24	45098	78	78	acpP	30	507	CAB53710.1	459
345	65.3846	45.098	30.8	0.44	3	51	24	45098	78	78	acpP	30	192	3FB2_A	144
346	65.3846	45.098	31.2	0.45	3	51	24	45098	78	78	acpP	30	167	EAW87805.1	119
347	65.3846	45.098	30.8	0.5	3	51	24	45098	78	78	acpP	30	1530	XP_006717313.1	1482
348	46.1538	47.222	28.9	2.6	2	36	17	47222	78	66	acpP	31	538	XP_006717313.1	505
349	65.3846	45.098	30.8	0.5	3	51	24	45098	78	78	acpP	30	1530	XP_006717309.1	1482
350	46.1538	47.222	28.9	2.6	2	36	17	47222	78	66	acpP	31	538	XP_006717309.1	505
351	65.3846	45.098	30.8	0.51	3	51	24	45098	78	78	acpP	30	1510	XP_006717315.1	1462
352	46.1538	47.222	28.9	2.6	2	36	17	47222	78	66	acpP	31	538	XP_006717315.1	505
353	65.3846	45.098	30.8	0.51	3	51	24	45098	78	78	acpP	30	1518	EAW87812.1	1470
354	46.1538	47.222	28.9	2.6	2	36	17	47222	78	66	acpP	31	526	EAW87812.1	493
355	65.3846	45.098	30.8	0.51	3	51	24	45098	78	78	acpP	30	1518	NP_003118.2	1470
356	46.1538	47.222	28.9	2.6	2	36	17	47222	78	66	acpP	31	526	NP_003118.2	493
357	65.3846	45.098	30.8	0.52	3	51	24	45098	78	78	acpP	30	1473	EAW87809.1	1425
358	46.1538	47.222	28.9	2.5	2	36	17	47222	78	66	acpP	31	526	EAW87809.1	493
359	65.3846	45.098	30.8	0.52	3	51	24	45098	78	78	acpP	30	1530	XP_006717312.1	1482
360	46.1538	47.222	28.9	2.7	2	36	17	47222	78	66	acpP	31	538	XP_006717312.1	505
361	65.3846	45.098	30.8	0.52	3	51	24	45098	78	78	acpP	30	1530	XP_006717311.1	1482
362	46.1538	47.222	28.9	2.6	2	36	17	47222	78	66	acpP	31	538	XP_006717311.1	505
363	65.3846	45.098	30.8	0.52	3	51	24	45098	78	78	acpP	30	843	AAA51702.1	795
364	65.3846	45.098	30.8	0.52	3	51	24	45098	78	78	acpP	30	1473	EAW87807.1	1425
365	46.1538	47.222	28.9	2.6	2	36	17	47222	78	66	acpP	31	526	EAW87807.1	493
366	65.3846	45.098	30.8	0.52	3	51	24	45098	78	78	acpP	30	1510	XP_006717316.1	1462
367	46.1538	47.222	28.9	2.6	2	36	17	47222	78	66	acpP	31	538	XP_006717316.1	505
368	65.3846	45.098	30.8	0.52	3	51	24	45098	78	78	acpP	30	1518	EAW87808.1	1470
369	46.1538	47.222	28.9	2.7	2	36	17	47222	78	66	acpP	31	526	EAW87808.1	493
370	65.3846	45.098	30.8	0.52	3	51	24	45098	78	78	acpP	30	1526	EAW87810.1	1478
371	46.1538	47.222	28.9	2.7	2	36	17	47222	78	66	acpP	31	526	EAW87810.1	493
372	65.3846	45.098	30.8	0.53	3	51	24	45098	78	78	acpP	30	1530	XP_006717308.1	1482
373	46.1538	47.222	28.9	2.6	2	36	17	47222	78	66	acpP	31	538	XP_006717308.1	505
374	65.3846	45.098	30.8	0.53	3	51	24	45098	78	78	acpP	30	1510	XP_016870549.1	1462
375	46.1538	47.222	28.9	2.6	2	36	17	47222	78	66	acpP	31	538	XP_016870549.1	505
376	65.3846	45.098	30.8	0.53	3	51	24	45098	78	78	acpP	30	1518	XP_016870548.1	1470
377	46.1538	47.222	28.9	2.6	2	36	17	47222	78	66	acpP	31	526	XP_016870548.1	493
378	65.3846	45.098	30.8	0.53	3	51	24	45098	78	78	acpP	30	1518	AAA51790.1	1470
379	65.3846	45.098	30.8	0.53	3	51	24	45098	78	78	acpP	30	1518	NP_001350688.1	1470
380	46.1538	47.222	28.9	2.7	2	36	17	47222	78	66	acpP	31	526	NP_001350688.1	493
381	65.3846	45.098	30.8	0.54	3	51	24	45098	78	78	acpP	30	708	AAB60364.1	660
382	65.3846	45.098	30.8	0.54	3	51	24	45098	78	78	acpP	30	1518	AAB41498.1	1470
383	46.1538	47.222	28.9	2.7	2	36	17	47222	78	66	acpP	31	526	AAB41498.1	493
384	65.3846	45.098	30.8	0.54	3	51	24	45098	78	78	acpP	30	1518	NP_001123910.1	1470
385	46.1538	47.222	28.9	2.7	2	36	17	47222	78	66	acpP	31	526	NP_001123910.1	493
386	65.3846	45.098	30.8	0.54	3	51	24	45098	78	78	acpP	30	1510	XP_006717310.1	1462
387	46.1538	47.222	28.9	2.7	2	36	17	47222	78	66	acpP	31	538	XP_006717310.1	505
388	65.3846	45.098	30.8	0.55	3	51	24	45098	78	78	acpP	30	1498	NP_001182461.1	1450
389	46.1538	47.222	28.9	2.7	2	36	17	47222	78	66	acpP	31	526	NP_001182461.1	493
390	65.3846	45.098	30.8	0.55	3	51	24	45098	78	78	acpP	30	1498	EAW87811.1	1450
391	46.1538	47.222	28.9	2.7	2	36	17	47222	78	66	acpP	31	526	EAW87811.1	493
392	65.3846	45.098	30.8	0.55	3	51	24	45098	78	78	acpP	30	1498	NP_001350694.1	1450
393	46.1538	47.222	28.9	2.7	2	36	17	47222	78	66	acpP	31	526	NP_001350694.1	493
394	65.3846	45.098	30.8	0.56	3	51	24	45098	78	78	acpP	30	1552	BAD93097.1	1504
395	46.1538	47.222	28.9	2.9	2	36	17	47222	78	66	acpP	31	560	BAD93097.1	527
396	65.3846	45.098	30.8	0.57	3	51	24	45098	78	78	acpP	30	1498	XP_006717314.1	1450
397	46.1538	47.222	28.9	2.7	2	36	17	47222	78	66	acpP	31	526	XP_006717314.1	493
398	65.3846	45.098	30.8	0.63	3	51	24	45098	78	78	acpP	30	1518	EAW87806.1	1470
399	46.1538	47.222	28.9	3	2	36	17	47222	78	66	acpP	31	526	EAW87806.1	493
400	62.8205	34.694	30.4	0.68	0	49	32	34694	78	64	acpP	16	140	AAB35516.1	92
401	62.8205	34.694	30.4	0.81	0	49	32	34694	78	64	acpP	16	111	AAH07909.1	63
402	62.8205	32.653	28.5	2	0	49	33	32653	78	64	acpP	16	67	2CG5_B	19
403	46.1538	47.222	28.9	2.9	2	36	17	47222	78	66	acpP	31	526	BAG62120.1	493
404	46.1538	47.222	28.9	3.1	2	36	17	47222	78	66	acpP	31	526	BAG57892.1	493
405	65.3846	39.216	28.5	3.5	1	51	29	39216	78	71	acpP	23	264	EAW80439.1	214
406	39.7436	38.71	28.1	4.2	0	31	19	38710	78	77	acpP	47	139	DAA01055.1	109
407	35.8974	39.286	28.1	4.2	0	28	17	39286	78	74	acpP	47	123	NP_982260.2	96
408	35.8974	39.286	28.1	4.3	0	28	17	39286	78	74	acpP	47	122	Q6XD76.1	95
409	52.381	24.242	28.1	9.5	2	66	41	24242	126	65	acpS	1	76	NP_001436.1	19
410	52.381	24.242	28.1	9.5	2	66	41	24242	126	65	acpS	1	75	1O1U_A	18
411	52.381	24.242	28.1	9.8	2	66	41	24242	126	65	acpS	1	75	2MM3_A	18
412	52.381	24.242	28.1	9.9	2	66	41	24242	126	65	acpS	1	76	EAW61565.1	19
456	21.4953	34.783	38.5	0.02	0	46	30	34783	214	47	adk	2	327	XP_011516579.1	282
459	90.1869	25.389	53.1	2.44e-07	6	193	111	25389	214	182	adk	2	412	EAW88017.1	241
496	24.2991	48.077	57.4	9.93e-09	0	52	27	48077	214	54	adk	3	431	EAX06378.1	380
508	89.7196	25.521	53.9	1.65e-07	6	192	126	25521	214	184	adk	1	1666	XP_016865875.1	1484
509	81.3084	24.138	34.7	0.42	4	174	83	24138	214	125	adk	1	1237	XP_016865875.1	1064
513	41.5888	28.09	36.2	0.12	2	89	57	28090	214	82	adk	1	1572	XP_011533857.1	1484
514	30.3738	30.769	34.7	0.41	1	65	44	30769	214	125	adk	62	1237	XP_011533857.1	1173
516	81.3084	24.138	34.7	0.43	4	174	83	24138	214	125	adk	1	1237	XP_016865877.1	1064
518	30.3738	30.769	34.7	0.48	1	65	44	30769	214	125	adk	62	1237	XP_011533858.1	1173
522	89.7196	25.521	48.1	1.69e-05	6	192	126	25521	214	184	adk	1	1666	XP_011533852.1	1484
523	28.5047	32.787	33.5	0.98	1	61	40	32787	214	121	adk	62	1233	XP_011533852.1	1173
525	87.3832	26.203	54.3	1.46e-07	5	187	126	26203	214	184	adk	1	1661	XP_006715439.2	1484
526	28.5047	32.787	33.5	1	1	61	40	32787	214	121	adk	62	1233	XP_006715439.2	1173
528	89.7196	25.521	47.8	1.96e-05	6	192	126	25521	214	184	adk	1	1594	XP_011533854.1	1412
529	28.5047	32.787	33.5	1	1	61	40	32787	214	121	adk	62	1161	XP_011533854.1	1101
531	89.7196	25.521	47.8	2.05e-05	6	192	126	25521	214	184	adk	1	1666	XP_016865873.1	1484
532	28.5047	32.787	33.5	1	1	61	40	32787	214	121	adk	62	1233	XP_016865873.1	1173
534	89.7196	25.521	47.8	2.03e-05	6	192	126	25521	214	184	adk	1	1559	XP_011533856.1	1377
535	28.5047	32.787	33.5	1	1	61	40	32787	214	121	adk	62	1126	XP_011533856.1	1066
537	87.3832	26.203	53.9	2.14e-07	5	187	126	26203	214	184	adk	1	1589	NP_001138600.2	1412
538	28.5047	32.787	33.5	1.2	1	61	40	32787	214	121	adk	62	1161	NP_001138600.2	1101
539	62.1495	28.571	54.3	1.23e-08	3	133	67	28571	214	184	adk	53	106	XP_024303208.1	1
540	100	25.701	55.1	1.64e-08	7	214	80	25701	214	213	adk	3	175	NP_001129612.1	38
541	100	25.701	55.1	1.85e-08	7	214	80	25701	214	213	adk	3	175	BAG60709.1	38
542	87.3832	26.203	54.3	1.45e-07	5	187	126	26203	214	184	adk	1	595	EAW48336.1	418
543	28.5047	32.787	33.5	0.86	1	61	40	32787	214	121	adk	62	240	EAW48336.1	180
544	89.7196	25.521	53.5	2.28e-07	6	192	126	25521	214	184	adk	1	1212	XP_016865876.1	1030
545	30.3738	30.769	34.7	0.38	1	65	44	30769	214	125	adk	62	783	XP_016865876.1	719
546	71.4953	25.49	51.6	9.56e-07	5	153	77	25490	214	122	adk	1	514	NP_001337819.1	368
547	71.4953	25.49	51.2	1.29e-06	5	153	77	25490	214	122	adk	1	514	NP_001337817.1	368
548	25.2336	37.037	45.4	1.61e-05	0	54	34	37037	214	59	adk	6	54	NP_001308530.1	1
549	89.7196	25.521	48.1	1.67e-05	6	192	126	25521	214	184	adk	1	870	XP_011533860.1	688
550	28.5047	32.787	33.5	1	1	61	40	32787	214	121	adk	62	437	XP_011533860.1	377
551	89.7196	25.521	48.1	1.67e-05	6	192	126	25521	214	184	adk	1	1011	XP_016865878.1	829
552	28.5047	32.787	33.5	1	1	61	40	32787	214	121	adk	62	578	XP_016865878.1	518
553	89.7196	25.521	47.8	2.45e-05	6	192	126	25521	214	184	adk	1	1379	XP_016865874.1	1197
554	28.5047	32.787	33.5	1.2	1	61	40	32787	214	121	adk	62	946	XP_016865874.1	886
555	20.0935	39.535	43.9	5.63e-05	0	43	26	39535	214	43	adk	1	48	EAX06539.1	6
556	57.9439	27.419	46.2	5.73e-05	5	124	58	27419	214	93	adk	1	490	BAB71480.1	368
557	57.9439	27.419	46.2	7e-05	4	124	58	27419	214	93	adk	1	490	EAW81639.1	368
558	57.9439	27.419	46.2	7.02e-05	4	124	58	27419	214	93	adk	1	490	EAW81636.1	368
559	57.9439	27.419	45.8	7.57e-05	4	124	58	27419	214	93	adk	1	464	NP_001337820.1	342
560	57.9439	27.419	45.8	7.77e-05	4	124	58	27419	214	93	adk	1	490	NP_689540.2	368
561	57.9439	27.419	45.8	8.32e-05	4	124	58	27419	214	93	adk	1	464	XP_006720085.1	342
562	57.0093	27.049	42.7	9.22e-05	3	122	61	27049	214	173	adk	53	95	EAW87708.1	1
563	57.9439	27.419	45.8	9.71e-05	4	124	58	27419	214	93	adk	1	490	XP_006720084.1	368
564	26.6355	29.825	37.4	0.059	0	57	40	29825	214	99	adk	43	740	XP_011512441.1	684
565	26.6355	29.825	37.4	0.059	0	57	40	29825	214	99	adk	43	740	XP_011512440.1	684
566	26.6355	29.825	37.4	0.062	0	57	40	29825	214	99	adk	43	740	XP_011512437.1	684
567	26.6355	29.825	37.4	0.062	0	57	40	29825	214	99	adk	43	678	XP_016865369.1	622
568	26.6355	29.825	37.4	0.062	0	57	40	29825	214	99	adk	43	735	XP_011512439.1	679
569	26.6355	29.825	37.4	0.063	0	57	40	29825	214	99	adk	43	683	XP_011512442.1	627
570	26.6355	29.825	37.4	0.063	0	57	40	29825	214	99	adk	43	740	XP_011512438.1	684
571	26.6355	29.825	37	0.065	0	57	40	29825	214	99	adk	43	224	BAB21861.1	168
572	26.6355	29.825	37.4	0.065	0	57	40	29825	214	99	adk	43	598	XP_011512443.1	542
573	26.6355	29.825	37	0.068	0	57	40	29825	214	99	adk	43	740	XP_005248433.1	684
574	26.6355	29.825	37	0.069	0	57	40	29825	214	99	adk	43	735	XP_005248434.1	679
575	26.6355	29.825	37	0.078	0	57	40	29825	214	99	adk	43	740	XP_005248435.1	684
576	26.6355	29.825	37	0.08	0	57	40	29825	214	99	adk	43	740	XP_016865371.1	684
577	26.6355	29.825	37	0.081	0	57	40	29825	214	99	adk	43	683	XP_024301987.1	627
578	26.6355	29.825	37	0.082	0	57	40	29825	214	99	adk	43	740	NP_079143.3	684
579	81.3084	24.138	35	0.28	4	174	83	24138	214	125	adk	1	244	BAD18424.1	71
580	28.5047	32.787	33.9	0.42	1	61	40	32787	214	121	adk	62	95	AAH87860.1	35
581	40.6542	28.736	34.3	0.66	3	87	47	28736	214	86	adk	8	2270	XP_011521450.1	2191
582	40.6542	28.736	34.3	0.66	3	87	47	28736	214	86	adk	8	2276	XP_016878835.1	2197
583	40.6542	28.736	34.3	0.66	3	87	47	28736	214	86	adk	8	2287	XP_011521449.1	2208
584	40.6542	28.736	33.9	0.69	3	87	47	28736	214	86	adk	8	2297	XP_011521448.1	2218
585	40.6542	28.736	33.9	0.69	3	87	47	28736	214	86	adk	8	190	XP_011521454.1	111
586	40.6542	28.736	33.9	0.7	3	87	47	28736	214	86	adk	8	2236	NP_001257903.1	2157
587	40.6542	28.736	33.9	0.7	3	87	47	28736	214	86	adk	8	2253	XP_006721269.1	2174
588	40.6542	28.736	33.9	0.7	3	87	47	28736	214	86	adk	8	2263	XP_011521453.1	2184
589	40.6542	28.736	33.9	0.75	3	87	47	28736	214	86	adk	8	1640	XP_016878836.1	1561
590	35.9813	27.273	33.1	0.97	2	77	52	27273	214	182	adk	106	330	EAW88015.1	258
591	16.3551	40	31.6	2	0	35	21	40000	214	36	adk	2	39	NP_057367.1	5
592	16.3551	40	31.6	2.1	0	35	21	40000	214	36	adk	2	40	1RKB_A	6
593	16.3551	40	31.6	2.6	0	35	21	40000	214	36	adk	2	47	3IIJ_A	13
594	28.0374	28.333	32	3	1	60	37	28333	214	81	adk	28	521	BAC03851.1	462
595	25.7009	34.545	31.6	3.3	2	55	33	34545	214	204	adk	153	113	5YBV_B	59
596	25.7009	34.545	31.2	3.5	2	55	33	34545	214	204	adk	153	110	5YBV_A	56
597	28.0374	28.333	31.6	3.7	1	60	37	28333	214	81	adk	28	532	AAH09982.2	473
598	28.0374	28.333	31.6	3.7	1	60	37	28333	214	81	adk	28	690	CAD39169.1	631
599	25.7009	34.545	31.2	3.8	2	55	33	34545	214	204	adk	153	128	4HBD_A	74
600	16.3551	40	31.2	3.9	0	35	21	40000	214	36	adk	2	73	5JZV_A	39
601	28.0374	28.333	31.6	4.1	1	60	37	28333	214	81	adk	28	352	AAI05988.1	293
602	27.1028	27.586	31.2	4.4	1	58	38	27586	214	85	adk	28	402	EAW64712.1	349
603	14.486	48.387	30.4	9.4	0	31	16	48387	214	33	adk	3	88	AAH35132.1	58
604	14.486	48.387	30.4	9.4	0	31	16	48387	214	33	adk	3	88	NP_079114.3	58
621	44.7489	22.704	63.9	2.6e-09	11	392	269	22704	876	874	alaS	491	582	NP_001129514.2	217
622	44.9772	23.35	63.5	3.57e-09	13	394	264	23350	876	874	alaS	491	539	BAG52811.1	174
623	44.9772	23.35	62.8	5.33e-09	13	394	264	23350	876	874	alaS	491	521	NP_079543.1	156
624	44.7489	22.704	60.8	1.64e-08	11	392	269	22704	876	874	alaS	491	408	NP_001248363.1	43
625	32.9909	23.183	57.4	2.71e-07	8	289	202	23183	876	774	alaS	491	490	EAW60906.1	217
626	14.9543	24.427	38.1	0.31	4	131	91	24427	876	688	alaS	564	362	AAI43944.1	234
627	22.4886	27.919	36.6	0.34	8	197	105	27919	876	864	alaS	681	176	EAW51838.1	4
628	14.9543	24.427	37.7	0.35	4	131	91	24427	876	688	alaS	564	362	XP_006720449.1	234
629	14.9543	24.427	37.7	0.37	4	131	91	24427	876	688	alaS	564	362	NP_689547.2	234
630	14.9543	24.427	37.4	0.42	4	131	91	24427	876	688	alaS	564	362	XP_016877401.1	234
631	22.4886	27.919	36.2	0.57	8	197	105	27919	876	864	alaS	681	202	5T5S_A	30
632	10.1598	29.213	34.3	2.5	1	89	61	29213	876	797	alaS	711	110	AAH22229.1	22
633	11.6438	29.412	33.5	5.3	3	102	63	29412	876	418	alaS	325	236	AAH92467.1	136
634	10.8447	30.526	32	5.7	4	95	56	30526	876	506	alaS	414	97	AAK91763.1	11
635	11.6438	29.412	33.1	8.6	3	102	63	29412	876	418	alaS	325	236	XP_016876162.1	136
636	11.6438	29.412	33.1	8.7	3	102	63	29412	876	418	alaS	325	236	AAG21074.1	136
637	11.6438	29.412	33.1	8.8	3	102	63	29412	876	418	alaS	325	236	AAI13112.1	136
638	7.19178	33.333	31.6	8.8	1	63	40	33333	876	396	alaS	334	98	NP_003753.2	38
639	11.6438	29.412	33.1	8.9	3	102	63	29412	876	418	alaS	325	236	NP_060921.3	136
640	7.19178	31.746	31.6	8.9	1	63	41	31746	876	396	alaS	334	97	NP_001172056.1	37
641	11.6438	29.412	33.1	9	3	102	63	29412	876	418	alaS	325	236	XP_011533451.1	136
642	11.6438	29.412	33.1	9.2	3	102	63	29412	876	418	alaS	325	236	BAF85095.1	136
643	10.1598	29.213	33.1	9.3	2	89	55	29213	876	405	alaS	325	224	XP_011533452.1	136
644	14.9543	27.481	33.1	9.4	7	131	85	27481	876	180	alaS	54	447	NP_659475.2	323
645	11.6438	29.412	33.1	10	3	102	63	29412	876	418	alaS	325	236	CAI46195.1	136
664	17.5043	28.713	35	0.98	4	101	52	28713	577	160	argS	74	187	BAG57688.1	93
665	17.5043	28.713	34.3	2.6	4	101	52	28713	577	160	argS	74	769	BAD92716.1	675
666	17.5043	28.713	34.3	2.7	4	101	52	28713	577	160	argS	74	217	AQY77370.2	123
667	17.5043	28.713	34.3	2.8	4	101	52	28713	577	160	argS	74	187	NP_065175.4	93
668	17.5043	28.713	34.3	2.8	4	101	52	28713	577	160	argS	74	187	BAB67778.2	93
669	17.5043	28.713	34.3	2.9	4	101	52	28713	577	160	argS	74	187	EAX03348.1	93
670	17.5043	28.713	34.3	2.9	4	101	52	28713	577	160	argS	74	217	AQY77377.2	123
671	17.5043	28.713	34.3	2.9	4	101	52	28713	577	160	argS	74	187	BAG64468.1	93
672	17.5043	28.713	34.3	2.9	4	101	52	28713	577	160	argS	74	217	AQY77372.2	123
673	17.5043	28.713	34.3	2.9	4	101	52	28713	577	160	argS	74	187	AAI12055.1	93
674	17.5043	28.713	34.3	2.9	4	101	52	28713	577	160	argS	74	217	NP_001161206.1	123
675	17.5043	28.713	34.3	2.9	4	101	52	28713	577	160	argS	74	217	AQY77373.2	123
676	17.5043	28.713	34.3	2.9	4	101	52	28713	577	160	argS	74	217	BAG65557.1	123
677	17.5043	28.713	34.3	3	4	101	52	28713	577	160	argS	74	187	AAI43537.1	93
678	17.5043	28.713	34.3	3	4	101	52	28713	577	160	argS	74	217	AQY77371.2	123
679	17.5043	28.713	34.3	3	4	101	52	28713	577	160	argS	74	217	AQY77369.2	123
680	17.5043	28.713	33.9	3.3	4	101	52	28713	577	160	argS	74	187	EAX03349.1	93
681	11.4385	27.273	32.7	7.5	0	66	48	27273	577	252	argS	187	667	NP_001230075.1	602
682	11.4385	27.273	32.3	9.3	0	66	48	27273	577	252	argS	187	659	AAH12105.1	594
683	22.3433	29.268	32.3	5.7	5	82	47	29268	367	122	asd	45	83	XP_011539351.1	9
684	21.2534	28.205	32	6.1	4	78	49	28205	367	122	asd	45	82	NP_001284594.1	12
685	21.2534	28.205	32	6.3	4	78	49	28205	367	122	asd	45	82	NP_001073963.1	12
686	21.2534	28.205	32	6.8	4	78	49	28205	367	122	asd	45	98	AAH28374.1	28
687	22.6158	24.096	30.8	8.8	2	83	55	24096	367	244	asd	162	81	1KFX_S	7
713	34.7639	32.716	57.8	7.7e-08	7	162	85	32716	466	462	asnS	315	570	4AH6_A	419
714	56.867	22.264	41.6	0.01	11	265	169	22264	466	272	asnS	19	264	4AH6_A	26
715	34.7639	32.716	57.4	9.85e-08	7	162	85	32716	466	462	asnS	315	427	BAB14228.1	276
716	34.7639	32.716	57.4	9.89e-08	7	162	85	32716	466	462	asnS	315	609	BAF83562.1	458
717	56.867	22.264	42	0.007	11	265	169	22264	466	272	asnS	19	303	BAF83562.1	65
718	34.7639	32.716	57.4	1.03e-07	7	162	85	32716	466	462	asnS	315	609	NP_060592.2	458
719	56.867	22.264	41.2	0.013	11	265	169	22264	466	272	asnS	19	303	NP_060592.2	65
720	34.7639	32.716	56.6	1.38e-07	7	162	85	32716	466	462	asnS	315	427	BAA91658.1	276
721	12.8755	41.667	48.5	1.69e-05	1	60	32	41667	466	460	asnS	404	152	BAB14197.1	93
722	7.93991	54.054	47.4	0.000139	0	37	17	54054	466	462	asnS	426	572	EAW90960.1	536
723	56.867	22.264	41.2	0.013	11	265	169	22264	466	272	asnS	19	303	EAW90960.1	65
724	56.867	22.264	40.8	0.013	11	265	169	22264	466	272	asnS	19	303	NP_001352142.1	65
725	31.3305	23.288	35.8	0.49	4	146	104	23288	466	161	asnS	20	269	BAG57897.1	128
726	31.3305	23.288	35.4	0.54	4	146	104	23288	466	161	asnS	20	236	BAG57352.1	95
727	7.08155	36.364	35.8	0.6	0	33	21	36364	466	458	asnS	426	397	BAC86604.1	365
728	7.08155	36.364	35	1	0	33	21	36364	466	458	asnS	426	557	EAW95623.1	525
729	7.08155	36.364	35	1.1	0	33	21	36364	466	458	asnS	426	599	NP_001123561.1	567
730	7.08155	36.364	35	1.1	0	33	21	36364	466	458	asnS	426	599	AAG30114.1	567
731	7.08155	36.364	35	1.1	0	33	21	36364	466	458	asnS	426	571	BAA06688.2	539
732	7.08155	36.364	35	1.1	0	33	21	36364	466	458	asnS	426	571	NP_005539.1	539
733	7.08155	36.364	34.7	1.2	0	33	21	36364	466	458	asnS	426	415	XP_016878706.1	383
734	7.08155	36.364	35	1.2	0	33	21	36364	466	458	asnS	426	608	EAW95621.1	576
735	7.08155	36.364	34.7	1.4	0	33	21	36364	466	458	asnS	426	503	6ILH_A	471
736	7.08155	36.364	34.7	1.5	0	33	21	36364	466	458	asnS	426	503	4YCW_A	471
737	7.08155	36.364	34.7	1.5	0	33	21	36364	466	458	asnS	426	503	3BJU_A	471
738	7.08155	36.364	34.7	1.5	0	33	21	36364	466	458	asnS	426	503	4DPG_A	471
739	18.2403	28.235	31.2	3.8	3	85	49	28235	466	231	asnS	152	98	AFW97797.1	21
740	7.08155	42.424	31.6	3.8	0	33	19	42424	466	218	asnS	186	91	AKD41509.1	59
741	19.0987	31.461	32.7	3.9	5	89	52	31461	466	442	asnS	357	212	EAW93766.1	130
742	7.08155	42.424	31.2	6.1	0	33	19	42424	466	218	asnS	186	91	AKD41430.1	59
743	8.15451	39.474	31.2	6.6	1	38	21	39474	466	221	asnS	186	96	AKD41521.1	59
744	8.3691	35.897	30.8	6.8	1	39	23	35897	466	222	asnS	186	97	CCD30921.1	59
745	8.15451	39.474	30.8	7	1	38	21	39474	466	221	asnS	186	96	AKD41552.1	59
746	8.15451	39.474	30.8	7.1	1	38	21	39474	466	221	asnS	186	96	AKD41520.1	59
747	8.15451	39.474	30.8	7.2	1	38	21	39474	466	221	asnS	186	96	AKD41551.1	59
748	14.3777	31.343	29.6	8.1	1	67	42	31343	466	234	asnS	172	73	ANO55308.1	7
759	6.10169	52.778	47.8	0.000139	0	36	17	52778	590	555	aspS	520	503	4DPG_A	468
761	6.10169	52.778	47.8	0.000139	0	36	17	52778	590	555	aspS	520	503	3BJU_A	468
763	6.10169	52.778	48.1	0.000109	0	36	17	52778	590	555	aspS	520	571	BAA06688.2	536
765	6.10169	52.778	48.1	0.00011	0	36	17	52778	590	555	aspS	520	571	NP_005539.1	536
767	6.10169	52.778	48.1	0.000114	0	36	17	52778	590	555	aspS	520	599	AAG30114.1	564
769	6.10169	52.778	48.1	0.000114	0	36	17	52778	590	555	aspS	520	599	NP_001123561.1	564
771	6.10169	52.778	48.1	0.000129	0	36	17	52778	590	555	aspS	520	608	EAW95621.1	573
773	6.10169	52.778	47.8	0.000138	0	36	17	52778	590	555	aspS	520	503	6ILH_A	468
775	6.10169	52.778	47.8	0.000134	0	36	17	52778	590	555	aspS	520	503	4YCW_A	468
777	6.10169	52.778	47.8	0.000119	0	36	17	52778	590	555	aspS	520	415	XP_016878706.1	380
779	6.10169	52.778	48.9	5.99e-05	0	36	17	52778	590	555	aspS	520	397	BAC86604.1	362
785	14.5763	33.721	62.8	3.26e-09	1	86	53	33721	590	556	aspS	471	493	AAA35567.1	412
797	21.3559	30.159	61.2	4.1e-09	3	126	83	30159	590	262	aspS	138	129	AAY15029.1	8
800	17.1186	31.683	52	6.07e-06	4	101	61	31683	590	564	aspS	465	477	NP_078954.4	384
802	17.6271	30.769	48.1	0.000108	5	104	49	30769	590	564	aspS	465	468	XP_011543555.1	384
804	17.1186	31.683	52	5.86e-06	4	101	61	31683	590	564	aspS	465	477	AAH07800.2	384
805	41.5254	26.531	62	5.39e-09	9	245	162	26531	590	252	aspS	15	282	5XIX_A	49
806	17.7966	27.619	47	0.00027	3	105	70	27619	590	556	aspS	454	465	5XIX_A	365
807	41.5254	26.531	61.2	8.95e-09	9	245	162	26531	590	252	aspS	15	358	BAD96555.1	125
808	17.7966	27.619	47.4	0.000181	3	105	70	27619	590	556	aspS	454	541	BAD96555.1	441
809	41.5254	26.531	61.2	9.03e-09	9	245	162	26531	590	252	aspS	15	358	NP_004530.1	125
810	17.7966	27.619	47.4	0.000178	3	105	70	27619	590	556	aspS	454	541	NP_004530.1	441
811	41.5254	26.531	61.2	9.92e-09	9	245	162	26531	590	252	aspS	15	357	XP_005266757.1	124
812	17.7966	27.619	47.4	0.000178	3	105	70	27619	590	556	aspS	454	540	XP_005266757.1	440
813	42.8814	24.111	59.7	2.6e-08	9	253	166	24111	590	253	aspS	15	281	BAG51837.1	41
814	17.1186	31.683	52	6.07e-06	4	101	61	31683	590	564	aspS	465	477	BAG51837.1	384
815	42.5424	23.506	57.8	1.14e-07	8	251	162	23506	590	253	aspS	15	273	EAW75062.1	41
816	17.1186	31.683	52.4	5.55e-06	4	101	61	31683	590	564	aspS	465	469	EAW75062.1	376
817	17.1186	31.683	51.6	3.58e-06	4	101	61	31683	590	564	aspS	465	250	BAG37813.1	157
818	17.1186	31.683	51.6	3.64e-06	4	101	61	31683	590	564	aspS	465	250	NP_001230180.1	157
819	17.1186	31.683	51.6	3.68e-06	4	101	61	31683	590	564	aspS	465	250	BAB15655.1	157
820	24.7458	26.027	48.9	2.92e-05	5	146	94	26027	590	166	aspS	26	243	EAX08668.1	107
821	17.7966	27.619	48.1	7.9e-05	3	105	70	27619	590	556	aspS	454	292	BAG60122.1	192
822	17.1186	30.693	47.4	8.5e-05	5	101	53	30693	590	564	aspS	465	241	XP_016873793.1	157
823	6.10169	52.778	48.1	0.000114	0	36	17	52778	590	555	aspS	520	557	EAW95623.1	522
824	17.6271	26.923	44.3	0.002	3	104	72	26923	590	261	aspS	160	353	EAW95623.1	252
825	25.7627	26.974	40.4	0.016	6	152	97	26974	590	160	aspS	15	235	BAG57352.1	92
826	25.7627	26.974	40.8	0.016	6	152	97	26974	590	160	aspS	15	268	BAG57897.1	125
827	14.2373	26.19	32.7	2.8	1	84	57	26190	590	362	aspS	284	95	EAW95816.1	12
828	6.10169	33.333	29.3	7.6	0	36	24	33333	590	185	aspS	150	40	AVK78771.1	5
829	6.27119	32.432	29.6	9.8	0	37	25	32432	590	186	aspS	150	55	CAC34230.1	19
832	59.6296	21.118	64.7	1.12e-09	16	483	293	21118	810	807	bamA	349	465	NP_056195.3	47
833	59.6296	21.118	64.3	1.35e-09	16	483	293	21118	810	807	bamA	349	465	BAD96377.1	47
834	59.6296	21.532	62.4	5.92e-09	17	483	290	21532	810	807	bamA	349	464	AAH07830.1	47
835	59.6296	20.911	61.2	1.44e-08	16	483	294	20911	810	807	bamA	349	465	AAD34046.1	47
836	20.9877	23.529	46.6	0.000254	4	170	97	23529	810	807	bamA	641	270	BAG53408.1	131
837	20.9877	23.529	46.2	0.000311	4	170	97	23529	810	807	bamA	641	255	BAG60116.1	116
838	36.7347	31.111	30.4	6.4	3	90	54	31111	245	109	bamD	25	142	EAW58545.1	56
839	22.8571	28.571	30	7.3	1	56	38	28571	245	197	bamD	144	117	EAW98114.1	62
840	24.4898	28.333	30.4	9.6	1	60	41	28333	245	79	bamD	20	184	AEM63697.1	127
841	24.4898	28.333	30.4	9.7	1	60	41	28333	245	79	bamD	20	184	AEM63692.1	127
842	35.514	33.333	53.9	2.28e-07	5	114	67	33333	321	210	birA	104	121	BAA95510.1	10
843	48.5981	30.769	54.7	3.66e-07	7	156	90	30769	321	210	birA	65	548	XP_024307833.1	401
844	48.5981	30.769	54.7	3.7e-07	7	156	90	30769	321	210	birA	65	605	BAA13332.1	458
845	48.5981	30.769	54.7	3.94e-07	7	156	90	30769	321	210	birA	65	605	NP_000402.3	458
846	34.2679	33.636	54.3	4.42e-07	5	110	64	33636	321	210	birA	108	605	BAG36868.1	498
847	48.5981	30.769	54.3	5.19e-07	7	156	90	30769	321	210	birA	65	752	NP_001339443.1	605
848	7.47664	54.167	31.2	6	0	24	11	54167	321	65	birA	42	57	BAG57136.1	34
849	25	29.091	30.8	6.4	0	55	39	29091	220	195	can	141	165	AAH11848.1	111
850	40	29.545	30.4	7.7	2	88	56	29545	220	186	can	99	159	BAG63188.1	78
851	25	29.091	30.8	8	0	55	39	29091	220	195	can	141	242	AAH03526.1	188
852	25	29.091	30.4	9.2	0	55	39	29091	220	195	can	141	222	BAG61405.1	168
853	56.068	28.139	63.2	1.03e-09	8	231	133	28139	412	220	cca	5	273	NP_886552.3	61
854	56.068	28.139	62.8	1.08e-09	8	231	133	28139	412	220	cca	5	273	BAB70662.1	61
855	56.068	28.139	62.8	1.26e-09	8	231	133	28139	412	220	cca	5	244	AAD34042.1	32
856	56.068	28.139	62.4	1.39e-09	8	231	133	28139	412	220	cca	5	247	4X4W_A	35
857	56.068	28.139	62.4	1.84e-09	8	231	133	28139	412	220	cca	5	287	1OU5_A	75
858	47.5728	30.612	61.6	2.45e-09	7	196	111	30612	412	185	cca	5	246	NP_001289875.2	61
859	47.5728	30.612	61.6	2.93e-09	7	196	111	30612	412	185	cca	5	246	CAD39059.1	61
860	27.9126	24.348	33.9	2.1	3	115	70	24348	412	318	cca	204	105	NP_001341602.1	8
861	27.9126	24.348	33.9	2.3	3	115	70	24348	412	318	cca	204	234	NP_003908.1	137
862	27.9126	24.348	33.5	2.5	3	115	70	24348	412	318	cca	204	234	XP_016877234.1	137
873	20.3509	44.828	49.7	5.25e-06	1	58	31	44828	285	202	cdsA	145	194	EAX10425.1	138
874	28.4211	35.802	50.1	6.08e-06	2	81	47	35802	285	225	cdsA	145	308	XP_016863139.1	233
875	20.3509	44.828	49.3	1.08e-05	1	58	31	44828	285	202	cdsA	145	272	XP_006723723.1	216
876	51.2281	29.452	48.5	1.81e-05	3	146	78	29452	285	265	cdsA	145	378	XP_016863137.1	233
877	42.4561	26.446	40	0.011	2	121	74	26446	285	265	cdsA	145	338	XP_016863138.1	233
878	41.4557	29.771	45.4	0.000147	8	131	72	29771	316	206	coaA	88	147	2JEO_A	25
879	41.4557	29.771	45.1	0.000155	8	131	72	29771	316	206	coaA	88	145	EAW87979.1	23
880	41.7722	29.545	45.1	0.00016	8	132	71	29545	316	206	coaA	88	145	NP_001129426.1	23
881	41.7722	29.545	45.1	0.000163	8	132	71	29545	316	206	coaA	88	145	AAH15547.1	23
882	41.4557	29.771	45.1	0.000172	8	131	72	29771	316	206	coaA	88	145	ALQ34253.1	23
883	41.7722	29.545	45.1	0.000257	8	132	71	29545	316	206	coaA	88	144	AAL75943.1	22
884	41.7722	29.545	45.1	0.000267	8	132	71	29545	316	206	coaA	88	145	NP_113620.1	23
885	41.7722	29.545	44.7	0.000292	8	132	71	29545	316	206	coaA	88	145	CAG33562.1	23
886	38.6076	26.23	35.8	0.23	7	122	78	26230	316	201	coaA	88	139	1UDW_A	22
887	38.6076	26.23	35.8	0.24	7	122	78	26230	316	201	coaA	88	137	NP_036606.2	20
888	38.6076	26.23	35.8	0.25	7	122	78	26230	316	201	coaA	88	123	BAB56162.1	6
889	32.9114	27.885	35	0.33	6	104	58	27885	316	180	coaA	88	120	ALQ34254.1	23
890	34.4937	27.523	34.7	0.42	6	109	60	27523	316	184	coaA	88	124	EAW87982.1	23
891	33.2278	27.619	34.3	0.68	6	105	57	27619	316	180	coaA	88	120	NP_001305448.1	23
892	32.9114	26.923	32.7	1	6	104	65	26923	316	183	coaA	88	120	BAG57744.1	20
893	14.557	32.609	28.5	7.7	1	46	28	32609	316	121	coaA	76	45	CCQ43693.1	3
894	11.0759	42.857	30.8	9	1	35	19	42857	316	115	coaA	81	48	AAV38744.1	15
895	11.0759	42.857	30.8	9.2	1	35	19	42857	316	115	coaA	81	48	NP_000779.1	15
896	11.0759	40	30.8	9.2	0	35	21	40000	316	115	coaA	81	48	CAA66054.1	14
897	11.0759	42.857	30.8	9.8	1	35	19	42857	316	115	coaA	81	51	1P5Z_B	18
898	50.9434	24.691	29.6	9	1	81	53	24691	159	148	coaD	68	75	NP_001288204.1	3
911	41.7476	32.558	40.8	0.001	1	86	57	32558	206	191	coaE	107	93	XP_016880594.1	8
912	13.5922	50	31.6	2.2	0	28	14	50000	206	34	coaE	7	41	BAG57246.1	14
913	20.3883	38.095	31.6	3.3	2	42	21	38095	206	41	coaE	5	484	NP_001009814.1	443
914	20.3883	38.095	31.6	3.5	2	42	21	38095	206	41	coaE	5	463	BAG52993.1	422
915	20.3883	38.095	31.6	3.7	2	42	21	38095	206	41	coaE	5	190	CAD38878.1	149
916	20.3883	38.095	31.6	4.1	2	42	21	38095	206	41	coaE	5	484	NP_055873.1	443
917	20.3883	38.095	31.6	4.1	2	42	21	38095	206	41	coaE	5	451	AAI31803.1	410
918	13.5922	50	31.2	4.8	0	28	14	50000	206	34	coaE	7	302	BAG58539.1	275
919	12.6214	50	31.2	5	1	26	12	50000	206	29	coaE	5	468	EAX08666.1	443
920	13.5922	50	31.2	5.3	0	28	14	50000	206	34	coaE	7	41	XP_016867808.1	14
921	35.4369	32.877	30.8	5.4	2	73	40	32877	206	66	coaE	3	148	NP_005252.1	76
922	35.4369	32.877	30.4	6.1	2	73	40	32877	206	66	coaE	3	148	AAC50067.1	76
923	35.4369	32.877	30	9.1	2	73	40	32877	206	66	coaE	3	148	XP_016868804.1	76
924	6.89655	38.889	32	2.9	1	36	21	38889	522	347	cydA	312	117	CAB70905.1	83
925	9.00383	31.915	32.3	6	0	47	32	31915	522	244	cydA	198	147	BAG61728.1	101
926	9.00383	31.915	32	7.3	0	47	32	31915	522	244	cydA	198	147	5OWO_A	101
927	18.9974	31.944	31.6	9.4	3	72	42	31944	379	188	cydB	117	123	XP_006712297.1	59
1003	7.15532	39.024	40	0.034	0	41	25	39024	573	567	cydC	527	41	AAN76500.1	1
1005	7.15532	39.024	40	0.037	0	41	25	39024	573	567	cydC	527	42	EAW93728.1	2
1107	82.7225	22.152	51.2	1.62e-05	12	474	286	22152	573	564	cydC	100	789	XP_016878701.1	390
1121	10.4712	35	48.5	0.000111	0	60	39	35000	573	397	cydC	338	720	XP_016878729.1	661
1129	25.829	27.027	50.8	2.23e-05	2	148	99	27027	573	480	cydC	338	770	AAB83982.1	627
1130	10.4712	43.333	45.4	0.000855	1	60	28	43333	573	569	cydC	516	734	AAB83982.1	675
1135	10.4712	35	48.5	0.000109	0	60	39	35000	573	397	cydC	338	693	EAW53945.1	634
1152	10.4712	35	48.5	0.000105	0	60	39	35000	573	397	cydC	338	636	EAW53948.1	577
1157	10.4712	35	48.5	0.000108	0	60	39	35000	573	397	cydC	338	686	AAB83981.1	627
1173	25.829	27.027	50.4	2.56e-05	2	148	99	27027	573	480	cydC	338	720	EAW53937.1	577
1174	10.4712	43.333	45.4	0.001	1	60	28	43333	573	569	cydC	516	684	EAW53937.1	625
1180	25.829	27.027	50.4	2.84e-05	2	148	99	27027	573	480	cydC	338	804	XP_016878731.1	661
1181	10.4712	43.333	45.4	0.001	1	60	28	43333	573	569	cydC	516	768	XP_016878731.1	709
1303	36.4747	24.402	57.4	2.25e-07	5	209	139	24402	573	559	cydC	355	633	ABC87053.1	440
1460	16.9284	30.928	41.2	0.018	0	97	67	30928	573	431	cydC	335	1459	XP_016873690.1	1363
1500	41.5358	26.891	59.3	5.18e-08	7	238	155	26891	573	567	cydC	339	2165	AAC51144.1	1938
1508	41.5358	27.311	61.2	1.42e-08	7	238	154	27311	573	567	cydC	339	2165	CAA75729.1	1938
1592	11.5183	36.364	38.5	0.13	1	66	27	36364	573	389	cydC	324	940	EAX10058.1	890
1600	38.5689	24.887	61.6	9.63e-09	5	221	154	24887	573	567	cydC	351	1513	NP_001275914.1	1301
1604	38.5689	24.887	61.6	9.09e-09	5	221	154	24887	573	567	cydC	351	1452	XP_005256997.1	1240
1606	38.5689	24.887	61.6	1.05e-08	5	221	154	24887	573	567	cydC	351	1508	NP_001275915.1	1296
1609	38.5689	24.887	61.6	1.02e-08	5	221	154	24887	573	567	cydC	351	1513	AAI30281.1	1301
1615	39.7906	28.509	64.3	1.5e-09	6	228	148	28509	573	562	cydC	339	2027	EAW69557.1	1811
1647	45.7243	23.664	56.6	3.89e-07	10	262	184	23664	573	570	cydC	316	1612	AAC50967.1	1360
1649	45.7243	23.664	56.2	5.06e-07	10	262	184	23664	573	570	cydC	316	1612	AAI51841.1	1360
1651	45.7243	23.664	56.2	4.38e-07	10	262	184	23664	573	570	cydC	316	1612	NP_001080.2	1360
1655	45.7243	23.664	56.2	4.85e-07	10	262	184	23664	573	570	cydC	316	1616	BAE06126.1	1364
1662	9.07504	34.615	38.9	0.11	0	52	34	34615	573	402	cydC	351	1355	EAW89073.1	1304
1666	39.7906	24.561	63.2	3.78e-09	6	228	146	24561	573	567	cydC	351	1366	XP_016879504.1	1154
1668	39.7906	24.561	62.8	4.2e-09	6	228	146	24561	573	567	cydC	351	1524	XP_016879500.1	1312
1670	39.7906	24.561	62.8	4.31e-09	6	228	146	24561	573	567	cydC	351	1524	XP_024306297.1	1312
1672	39.7906	24.561	62.8	4.53e-09	6	228	146	24561	573	567	cydC	351	1516	EAW89074.1	1304
1674	39.7906	24.561	62.8	4.34e-09	6	228	146	24561	573	567	cydC	351	1516	XP_016879501.1	1304
1676	41.3613	24.051	48.5	0.00011	8	237	149	24051	573	570	cydC	351	4921	EAW60990.1	4699
1678	41.3613	24.051	48.5	0.00011	8	237	149	24051	573	570	cydC	351	4924	XP_011513434.1	4702
1680	41.3613	24.051	48.5	0.00011	8	237	149	24051	573	570	cydC	351	4924	XP_011513433.1	4702
1682	41.3613	24.051	48.5	0.00011	8	237	149	24051	573	570	cydC	351	4954	Q86UQ4.3	4732
1684	41.3613	24.051	48.5	0.00011	8	237	149	24051	573	570	cydC	351	4954	NP_689914.3	4732
1686	41.3613	24.051	48.5	0.00011	8	237	149	24051	573	570	cydC	351	4955	XP_011513432.1	4733
1688	41.3613	24.051	48.5	0.000111	8	237	149	24051	573	570	cydC	351	4954	AAP13576.1	4732
1725	59.3537	22.063	42	0.013	12	349	217	22063	588	473	cydD	155	1169	EAW76944.1	846
1799	7.65306	33.333	33.9	2.9	0	45	30	33333	588	581	cydD	537	45	EAW93728.1	1
1821	22.2789	38.168	60.5	2.19e-08	2	131	78	38168	588	581	cydD	452	130	BAG63812.1	2
1823	16.3265	37.5	60.1	2.56e-08	0	96	60	37500	588	581	cydD	486	96	XP_011510383.1	1
1852	12.9252	35.526	49.7	5.1e-05	1	76	48	35526	588	443	cydD	369	1288	XP_011510617.1	1213
1967	20.5782	29.752	52.8	5.36e-06	2	121	83	29752	588	488	cydD	369	1423	EAW53944.1	1304
1985	20.5782	29.752	52.8	5.31e-06	2	121	83	29752	588	488	cydD	369	1416	AAB83983.1	1297
1996	20.5782	29.752	53.1	4.73e-06	2	121	83	29752	588	488	cydD	369	1366	EAW53936.1	1247
2013	16.3265	37.5	60.8	1.62e-08	0	96	60	37500	588	581	cydD	486	96	BAG64170.1	1
2023	19.3878	25.439	34.7	1.8	4	114	65	25439	588	234	cydD	130	783	EAX10058.1	681
2088	35.8844	24.171	38.9	0.1	7	211	144	24171	588	413	cydD	209	643	EAW53948.1	443
2095	37.7551	20.27	49.7	5.3e-05	4	222	161	20270	588	581	cydD	362	644	ABC87053.1	437
2103	7.9932	44.681	40.4	0.033	0	47	26	44681	588	581	cydD	535	685	EAW53937.1	639
2104	32.8231	24.352	36.6	0.58	6	193	131	24352	588	396	cydD	209	625	EAW53937.1	443
2117	35.8844	24.171	39.3	0.074	7	211	144	24171	588	413	cydD	209	727	XP_016878729.1	527
2121	64.4558	22.164	53.1	3.92e-06	10	379	212	22164	588	581	cydD	209	744	EAW53943.1	443
2124	7.9932	44.681	40.4	0.04	0	47	26	44681	588	581	cydD	535	769	XP_016878731.1	723
2125	32.8231	24.352	37	0.39	6	193	131	24352	588	396	cydD	209	709	XP_016878731.1	527
2128	35.8844	24.171	39.3	0.089	7	211	144	24171	588	413	cydD	209	693	AAB83981.1	493
2131	35.8844	24.171	39.3	0.071	7	211	144	24171	588	413	cydD	209	700	EAW53945.1	500
2135	64.4558	22.164	53.5	3.53e-06	10	379	212	22164	588	581	cydD	209	794	AAB83980.1	493
2139	12.9252	34.211	37.4	0.32	1	76	49	34211	588	443	cydD	369	1407	XP_016866940.1	1332
2142	64.4558	22.164	53.5	3.56e-06	10	379	212	22164	588	581	cydD	209	801	EAW53938.1	500
2144	12.9252	34.211	37.4	0.34	1	76	49	34211	588	443	cydD	369	1407	XP_016866939.1	1332
2146	7.9932	44.681	40.4	0.039	0	47	26	44681	588	581	cydD	535	735	AAB83982.1	689
2147	32.8231	24.352	37	0.45	6	193	131	24352	588	396	cydD	209	675	AAB83982.1	493
2158	23.2993	30.657	41.6	0.017	4	137	88	30657	588	502	cydD	369	1464	XP_016866937.1	1332
2217	77.0408	23.4	50.1	4.16e-05	15	453	237	23400	588	581	cydD	150	795	XP_016878701.1	432
2245	35.034	23.786	45.1	0.001	6	206	137	23786	588	546	cydD	351	1402	EAW89078.1	1207
2247	35.034	23.786	45.1	0.001	6	206	137	23786	588	546	cydD	351	1402	NP_525021.3	1207
2250	35.034	23.786	45.1	0.001	6	206	137	23786	588	546	cydD	351	1402	AAK30025.1	1207
2252	35.034	23.786	45.1	0.001	6	206	137	23786	588	546	cydD	351	1402	AAO72161.1	1207
2301	35.034	28.155	53.1	4.58e-06	8	206	131	28155	588	561	cydD	361	1296	XP_016879895.1	1103
2303	35.034	28.641	54.3	2.09e-06	8	206	130	28641	588	561	cydD	361	1491	AAI25233.1	1298
2305	35.034	28.155	52.8	5.49e-06	8	206	131	28155	588	561	cydD	361	1491	EAW89075.1	1298
2307	35.034	28.155	52.8	5.4e-06	8	206	131	28155	588	561	cydD	361	1491	AAM77557.1	1298
2309	35.034	28.155	52.8	5.68e-06	8	206	131	28155	588	561	cydD	361	1491	NP_525023.2	1298
2311	35.034	28.641	53.9	2.48e-06	8	206	130	28641	588	561	cydD	361	1491	AAK30023.1	1298
2312	15.8163	32.258	59.3	1.01e-09	0	93	63	32258	588	563	cydD	471	97	BAC04300.1	5
2313	36.2245	28.169	63.9	1.01e-09	8	213	126	28169	588	570	cydD	375	280	EAX00288.1	78
2314	34.3537	27.723	64.3	1.09e-09	6	202	123	27723	588	543	cydD	350	660	NP_000024.2	474
2315	35.3741	27.885	64.3	1.16e-09	8	208	123	27885	588	570	cydD	380	199	XP_011531327.1	2
2316	34.3537	27.723	64.3	1.25e-09	6	202	123	27723	588	543	cydD	350	660	CAA79922.1	474
2317	34.3537	27.723	64.3	1.25e-09	6	202	123	27723	588	543	cydD	350	660	1908394A	474
2318	39.1156	32.174	64.3	1.38e-09	10	230	127	32174	588	586	cydD	371	399	XP_011522876.1	185
2319	35.034	28.155	52.8	6.13e-06	8	206	131	28155	588	561	cydD	361	1174	XP_011522876.1	981
2320	36.2245	28.169	62.8	1.43e-09	8	213	126	28169	588	570	cydD	375	280	XP_006712137.1	78
2321	43.1973	27.559	63.2	2.4e-09	11	254	158	27559	588	565	cydD	328	264	CAC17140.1	21
2322	31.1224	28.415	63.2	2.64e-09	4	183	116	28415	588	473	cydD	299	714	EAW70704.1	539
2323	43.1973	27.559	62.8	3.22e-09	11	254	158	27559	588	565	cydD	328	283	NP_071452.2	40
2324	33.6735	28.283	62.4	4.72e-09	9	198	125	28283	588	570	cydD	381	224	XP_011541254.1	36
2325	32.8231	28.497	62	5.59e-09	9	193	121	28497	588	565	cydD	381	222	NP_001335121.1	39
2326	36.9048	29.493	62	7.47e-09	9	217	123	29493	588	575	cydD	369	698	BAG65201.1	502
2327	36.9048	29.493	62	8.5e-09	9	217	123	29493	588	575	cydD	369	698	AAI30281.1	502
2328	36.0544	23.113	41.2	0.021	7	212	136	23113	588	561	cydD	361	1496	AAI30281.1	1301
2329	36.9048	29.493	61.6	8.77e-09	9	217	123	29493	588	575	cydD	369	698	BAG58673.1	502
2330	36.9048	29.493	61.6	8.86e-09	9	217	123	29493	588	575	cydD	369	698	XP_011522494.1	502
2331	36.7347	29.63	62	8.88e-09	9	216	122	29630	588	574	cydD	369	636	XP_005256997.1	441
2332	34.6939	23.529	41.2	0.023	7	204	129	23529	588	561	cydD	369	1435	XP_005256997.1	1248
2333	36.9048	29.493	62	8.94e-09	9	217	123	29493	588	575	cydD	369	698	NP_001275914.1	502
2334	36.0544	23.113	41.2	0.022	7	212	136	23113	588	561	cydD	361	1496	NP_001275914.1	1301
2335	35.7143	30.952	61.6	9.23e-09	11	210	127	30952	588	565	cydD	369	295	AAI43565.1	91
2336	36.9048	29.493	61.6	9.74e-09	9	217	123	29493	588	575	cydD	369	698	NP_001275915.1	502
2337	36.0544	23.113	41.2	0.023	7	212	136	23113	588	561	cydD	361	1491	NP_001275915.1	1296
2338	35.7143	30.952	61.2	1.01e-08	11	210	127	30952	588	565	cydD	369	295	AAK84663.1	91
2339	35.7143	30.952	61.2	1.01e-08	11	210	127	30952	588	565	cydD	369	295	AAI13658.1	91
2340	35.7143	30.952	61.2	1.02e-08	11	210	127	30952	588	565	cydD	369	297	5DO7_B	93
2341	35.7143	30.952	61.2	1.03e-08	11	210	127	30952	588	565	cydD	369	299	XP_011531331.1	95
2342	35.7143	30.952	61.2	1.04e-08	11	210	127	30952	588	565	cydD	369	299	XP_011531332.1	95
2343	35.7143	30.952	61.2	1.07e-08	11	210	127	30952	588	565	cydD	369	295	AAK84078.1	91
2344	35.7143	30.952	61.2	1.09e-08	11	210	127	30952	588	565	cydD	369	295	NP_001344250.1	91
2345	35.7143	30.952	61.2	1.12e-08	11	210	127	30952	588	565	cydD	369	295	EAX00285.1	91
2346	35.7143	30.952	61.2	1.13e-08	11	210	127	30952	588	565	cydD	369	295	NP_071882.1	91
2347	31.8027	29.412	60.5	2.1e-08	6	187	121	29412	588	549	cydD	369	307	EAW89080.1	126
2348	31.8027	29.412	59.7	2.17e-08	6	187	121	29412	588	549	cydD	369	352	CAE45856.1	171
2349	31.8027	29.412	60.5	2.52e-08	6	187	121	29412	588	549	cydD	369	681	EAW89083.1	500
2350	31.9728	30.319	60.1	2.87e-08	7	188	110	30319	588	549	cydD	371	688	XP_024306299.1	513
2351	31.8027	29.412	60.1	3e-08	6	187	121	29412	588	549	cydD	369	681	EAW89081.1	500
2352	31.8027	29.412	60.1	3.1e-08	6	187	121	29412	588	549	cydD	369	681	CAB93535.3	500
2353	37.585	20.362	46.2	0.000547	7	221	156	20362	588	561	cydD	351	1511	CAB93535.3	1301
2354	31.9728	30.319	60.1	3.11e-08	7	188	110	30319	588	549	cydD	371	680	EAW89073.1	505
2355	31.8027	29.412	59.7	3.2e-08	6	187	121	29412	588	549	cydD	369	681	BAF85281.1	500
2356	31.8027	29.412	60.1	3.24e-08	6	187	121	29412	588	549	cydD	369	681	NP_061142.2	500
2357	37.585	23.077	47	0.000396	9	221	141	23077	588	561	cydD	356	1511	NP_061142.2	1305
2358	31.9728	30.319	60.1	3.29e-08	7	188	110	30319	588	549	cydD	371	663	CAH10479.1	488
2359	31.8027	29.412	60.1	3.41e-08	6	187	121	29412	588	549	cydD	369	681	AAK30022.1	500
2360	37.585	23.077	46.6	0.000409	9	221	141	23077	588	561	cydD	356	1511	AAK30022.1	1305
2361	31.8027	29.412	59.7	3.44e-08	6	187	121	29412	588	549	cydD	369	681	CAD54757.1	500
2362	9.18367	50	52.8	3.86e-08	0	54	27	50000	588	529	cydD	476	56	ABH04430.1	3
2363	31.9728	30.319	59.7	4.07e-08	7	188	110	30319	588	549	cydD	371	530	XP_016879504.1	355
2364	35.034	23.786	40.8	0.028	8	206	126	23786	588	561	cydD	369	1349	XP_016879504.1	1162
2365	31.9728	30.319	59.3	4.23e-08	7	188	110	30319	588	549	cydD	371	680	BAB71359.1	505
2366	31.9728	30.319	59.7	4.39e-08	7	188	110	30319	588	549	cydD	371	680	AAK30024.1	505
2367	36.9048	24.424	40.4	0.036	9	217	132	24424	588	561	cydD	359	1499	AAK30024.1	1301
2368	31.9728	30.319	59.7	4.39e-08	7	188	110	30319	588	549	cydD	371	680	NP_525022.2	505
2369	35.034	23.786	40.4	0.039	8	206	126	23786	588	561	cydD	369	1499	NP_525022.2	1312
2370	31.9728	30.319	59.7	4.43e-08	7	188	110	30319	588	549	cydD	371	680	EAW89074.1	505
2371	35.034	23.786	40.4	0.04	8	206	126	23786	588	561	cydD	369	1499	EAW89074.1	1312
2372	31.9728	30.319	59.7	4.44e-08	7	188	110	30319	588	549	cydD	371	688	XP_024306297.1	513
2373	35.034	23.786	40.4	0.034	8	206	126	23786	588	561	cydD	369	1507	XP_024306297.1	1320
2374	31.9728	30.319	59.7	4.46e-08	7	188	110	30319	588	549	cydD	371	680	EAW89071.1	505
2375	32.9932	24.227	36.6	0.51	8	194	116	24227	588	561	cydD	381	1472	EAW89071.1	1297
2376	31.9728	30.319	59.7	4.47e-08	7	188	110	30319	588	549	cydD	371	688	XP_016879500.1	513
2377	35.034	23.786	40.4	0.036	8	206	126	23786	588	561	cydD	369	1507	XP_016879500.1	1320
2378	31.9728	30.319	59.7	4.51e-08	7	188	110	30319	588	549	cydD	371	680	XP_016879501.1	505
2379	35.034	23.786	40.4	0.036	8	206	126	23786	588	561	cydD	369	1499	XP_016879501.1	1312
2380	36.9048	29.032	59.3	4.61e-08	9	217	124	29032	588	575	cydD	369	637	BAG65144.1	441
2381	47.7891	25.623	58.9	4.69e-08	10	281	177	25623	588	424	cydD	154	575	AAH17348.1	317
2382	31.9728	30.319	58.2	7.79e-08	7	188	110	30319	588	549	cydD	371	307	BAC11021.1	132
2383	37.2449	24.658	58.5	1.1e-07	7	219	142	24658	588	565	cydD	357	1142	AAC23915.1	937
2384	13.9456	32.927	58.2	1.29e-07	0	82	55	32927	588	443	cydD	362	1304	ABD72199.1	1223
2385	37.7551	20.27	49.7	4.99e-05	4	222	161	20270	588	581	cydD	362	644	ABD72199.1	437
2386	37.2449	24.201	57.8	1.46e-07	7	219	143	24201	588	565	cydD	357	1142	EAW73057.1	937
2387	37.2449	24.658	57.8	1.79e-07	7	219	142	24658	588	565	cydD	357	1142	NP_000341.2	937
2388	37.2449	24.658	57.8	1.8e-07	7	219	142	24658	588	565	cydD	357	1142	AAC05632.1	937
2389	23.8095	32.143	57	1.83e-07	4	140	79	32143	588	497	cydD	359	546	BAH12910.1	422
2390	37.2449	24.201	57.8	1.85e-07	7	219	143	24201	588	565	cydD	357	1142	EAW73058.1	937
2391	37.2449	24.201	57.8	1.95e-07	7	219	143	24201	588	565	cydD	357	1142	CAA75729.1	937
2392	37.2449	24.201	57.4	2.14e-07	7	219	143	24201	588	565	cydD	357	1142	AAC51144.1	937
2393	37.2449	24.658	57.4	2.39e-07	7	219	142	24658	588	565	cydD	357	1142	BAE06122.2	937
2394	10.5442	38.71	50.4	3.01e-07	0	62	38	38710	588	553	cydD	492	63	BAA88711.1	2
2395	7.9932	48.936	48.5	1.02e-06	0	47	24	48936	588	522	cydD	476	49	ABH04443.1	3
2396	33.6735	27.778	55.1	1.04e-06	7	198	130	27778	588	561	cydD	369	741	NP_001080.2	552
2397	33.6735	28.788	55.1	1.06e-06	8	198	128	28788	588	561	cydD	369	741	AAC50967.1	552
2398	33.6735	27.778	55.1	1.11e-06	7	198	130	27778	588	561	cydD	369	741	AAI51841.1	552
2399	33.6735	27.778	55.1	1.21e-06	7	198	130	27778	588	561	cydD	369	745	BAE06126.1	556
2400	35.034	28.641	54.3	1.7e-06	8	206	130	28641	588	561	cydD	361	689	BAC04994.1	496
2401	22.2789	28.244	50.4	3.46e-06	3	131	75	28244	588	473	cydD	361	164	AAR99172.1	35
2402	11.7347	34.783	52.4	4.07e-06	0	69	45	34783	588	430	cydD	362	405	AAW33658.1	337
2403	35.034	28.155	52.4	4.65e-06	8	206	131	28155	588	561	cydD	361	351	BAG54204.1	158
2404	11.7347	34.783	52.4	4.86e-06	0	69	45	34783	588	430	cydD	362	418	AAW33659.1	350
2405	40.1361	26.271	52	4.98e-06	10	236	128	26271	588	582	cydD	360	299	AAH16988.1	97
2406	34.5238	26.108	52.4	5.25e-06	9	203	134	26108	588	565	cydD	369	287	BAC85435.1	95
2407	64.8649	50	26.2	5.1	1	24	11	50000	37	26	cydX	3	398	BAH14465.1	376
2408	64.8649	50	25.8	6.1	1	24	11	50000	37	26	cydX	3	486	NP_001269104.1	464
2409	64.8649	50	25.8	6.2	1	24	11	50000	37	26	cydX	3	398	NP_001269105.1	376
2410	64.8649	50	25.8	6.9	1	24	11	50000	37	26	cydX	3	500	BAD97273.1	478
2411	64.8649	50	25.8	7.1	1	24	11	50000	37	26	cydX	3	500	NP_001285.1	478
2412	64.8649	50	25.4	9.7	1	24	11	50000	37	26	cydX	3	500	AAH04865.1	478
2424	9.76139	48.889	53.1	2.47e-06	1	45	22	48889	461	81	cysS	38	45	EAX02539.1	1
2426	3.47072	87.5	32.7	5.2	0	16	2	87500	461	81	cysS	66	17	XP_016873880.1	2
2428	9.76139	48.889	53.1	2.47e-06	1	45	22	48889	461	81	cysS	38	45	BAG58331.1	1
2452	3.47072	87.5	32.7	4.9	0	16	2	87500	461	81	cysS	66	17	XP_024304473.1	2
2463	8.45987	30.769	37.4	0.13	0	39	27	30769	461	133	cysS	95	280	BAD92051.1	242
2464	26.2473	30.579	53.5	1.1e-07	3	121	61	30579	461	367	cysS	265	126	CAH10378.1	11
2465	16.4859	32.895	37.7	0.025	2	76	47	32895	461	331	cysS	257	88	BAA91702.1	16
2466	24.9458	28.696	38.5	0.1	4	115	73	28696	461	331	cysS	222	531	BAB14674.1	421
2467	24.9458	28.696	38.1	0.11	4	115	73	28696	461	331	cysS	222	696	EAW61850.1	586
2468	24.9458	28.696	38.1	0.11	4	115	73	28696	461	331	cysS	222	752	NP_057544.2	642
2469	24.9458	28.696	38.1	0.12	4	115	73	28696	461	331	cysS	222	725	NP_001304894.1	615
2470	16.4859	32.895	38.1	0.12	2	76	47	32895	461	331	cysS	257	88	AAI31799.1	16
2471	24.9458	28.696	38.1	0.12	4	115	73	28696	461	331	cysS	222	779	NP_064502.9	669
2472	24.9458	28.696	38.1	0.12	4	115	73	28696	461	331	cysS	222	779	BAA95667.1	669
2473	24.9458	28.696	38.1	0.12	4	115	73	28696	461	331	cysS	222	779	BAG37619.1	669
2474	24.9458	28.696	38.1	0.13	4	115	73	28696	461	331	cysS	222	733	NP_001304893.1	623
2475	24.9458	28.696	38.1	0.13	4	115	73	28696	461	331	cysS	222	733	BAG65028.1	623
2476	16.4859	32.895	37.7	0.13	2	76	47	32895	461	331	cysS	257	88	AAT08037.1	16
2477	11.7137	37.037	35	0.68	2	54	23	37037	461	294	cysS	241	47	AAH40934.1	5
2478	11.7137	37.037	34.7	1.1	2	54	23	37037	461	294	cysS	241	302	BAG62819.1	260
2479	11.7137	37.037	34.7	1.3	2	54	23	37037	461	294	cysS	241	375	NP_612404.1	333
2480	11.7137	37.037	34.7	1.3	2	54	23	37037	461	294	cysS	241	375	BAC92749.1	333
2481	11.7137	37.037	34.7	1.3	2	54	23	37037	461	294	cysS	241	376	AAH09115.1	334
2482	14.3167	34.848	33.5	2.2	2	66	40	34848	461	384	cysS	319	220	AAH66231.1	158
2483	20.8243	28.125	33.5	3.2	3	96	51	28125	461	450	cysS	358	406	EAW82294.1	326
2484	16.7028	29.87	32.7	4.2	4	77	42	29870	461	346	cysS	272	108	EAX03185.1	42
2485	14.3167	34.848	32.3	4.3	2	66	40	34848	461	384	cysS	319	220	NP_037378.1	158
2486	16.7028	29.87	32.7	4.3	4	77	42	29870	461	346	cysS	272	108	O76002.1	42
2487	14.3167	34.848	32.3	4.4	2	66	40	34848	461	384	cysS	319	210	NP_001159684.1	148
2488	10.4121	39.583	32.7	4.5	2	48	20	39583	461	375	cysS	328	111	BAN63144.1	73
2489	16.7028	29.87	32.7	4.7	4	77	42	29870	461	346	cysS	272	108	AAI08897.1	42
2490	10.846	36	31.2	5.6	2	50	23	36000	461	375	cysS	326	80	ADM44135.1	40
2491	16.7028	29.87	32.3	6.5	4	77	42	29870	461	346	cysS	272	108	AQY76974.1	42
2492	16.7028	29.87	32.3	6.5	4	77	42	29870	461	346	cysS	272	108	NP_112167.2	42
2493	16.7028	29.87	32	6.6	4	77	42	29870	461	346	cysS	272	108	AQY76976.1	42
2494	16.7028	29.87	32	6.6	4	77	42	29870	461	346	cysS	272	108	ALI87600.1	42
2495	16.7028	29.87	32	6.6	4	77	42	29870	461	346	cysS	272	108	CAC20497.1	42
2496	3.2538	66.667	30.8	7.8	0	15	5	66667	461	204	cysS	190	119	AAM75830.1	105
2506	65.7534	26.563	59.7	2.12e-09	5	192	134	26563	292	188	dapA	4	201	NP_001186980.1	10
2507	65.7534	26.563	59.7	2.62e-09	5	192	134	26563	292	188	dapA	4	201	EAW91135.1	10
2508	29.7945	25.287	30.8	7.1	1	87	63	25287	292	122	dapA	38	157	EAW49913.1	71
2509	34.6715	23.158	31.2	5.7	3	95	64	23158	274	273	dapD	188	180	AAH15484.1	86
2511	108.267	21.921	62.8	1.14e-09	18	406	267	21921	375	375	dapE	4	490	NP_001303260.1	101
2512	97.8667	23.978	62.8	1.2e-09	12	367	201	23978	375	355	dapE	60	485	BAF82605.1	126
2513	73.0667	24.818	60.8	4.66e-09	8	274	145	24818	375	276	dapE	60	373	3DLJ_A	104
2514	97.8667	23.706	60.8	4.77e-09	12	367	202	23706	375	355	dapE	60	485	Q96KN2.4	126
2515	73.0667	24.818	60.8	4.81e-09	8	274	145	24818	375	276	dapE	60	381	BAG64692.1	112
2516	73.0667	24.818	60.8	5.27e-09	8	274	145	24818	375	276	dapE	60	396	AAI10296.1	127
2517	73.0667	24.818	60.8	5.41e-09	8	274	145	24818	375	276	dapE	60	395	NP_116038.4	126
2518	73.0667	24.818	60.8	5.42e-09	8	274	145	24818	375	276	dapE	60	396	AAI17123.1	127
2519	33.3333	32	58.9	9.32e-09	2	125	77	32000	375	180	dapE	60	246	EAW66561.1	126
2520	74.4	24.731	58.2	3.43e-08	10	279	147	24731	375	277	dapE	57	363	NP_060705.2	90
2521	73.0667	24.453	57	8.14e-08	8	274	146	24453	375	276	dapE	60	396	CAD10388.1	127
2522	74.4	24.731	56.6	9.29e-08	10	279	147	24731	375	277	dapE	57	363	BAG53426.1	90
2523	76.5333	23.345	55.8	1.2e-07	12	287	194	23345	375	271	dapE	4	290	BAG60535.1	11
2524	74.4	24.731	56.2	1.4e-07	10	279	147	24731	375	277	dapE	57	363	CAC69883.1	90
2525	74.4	24.373	55.1	3.49e-07	10	279	148	24373	375	277	dapE	57	363	BAA91840.1	90
2526	91.4667	22.157	54.7	3.96e-07	15	343	224	22157	375	375	dapE	60	365	NP_001185827.1	39
2527	72.5333	24.265	54.3	5.34e-07	10	272	143	24265	375	270	dapE	57	356	EAW66557.1	90
2528	72.5333	24.265	53.9	5.86e-07	10	272	143	24265	375	270	dapE	57	356	EAW66553.1	90
2529	72.5333	23.529	47.4	7.49e-05	10	272	145	23529	375	277	dapE	64	268	BAG60563.1	2
2530	38.9333	26.712	45.1	0.000166	6	146	96	26712	375	140	dapE	4	154	1Q7L_A	11
2531	38.9333	26.712	44.3	0.000708	6	146	96	26712	375	140	dapE	4	154	NP_001185826.1	11
2532	38.6667	28.276	44.7	0.00075	7	145	85	28276	375	197	dapE	65	261	NP_689704.4	124
2533	38.6667	28.276	44.3	0.001	7	145	85	28276	375	197	dapE	65	261	AAH39170.1	124
2534	74.4	23.297	42.4	0.003	11	279	139	23297	375	277	dapE	57	351	BAG62540.1	90
2535	38.6667	27.586	40.8	0.012	7	145	86	27586	375	197	dapE	65	261	AAH63477.1	124
2536	38.4	29.167	39.3	0.026	7	144	83	29167	375	197	dapE	66	261	BAB71368.1	125
2537	35.7333	26.119	32.7	1.2	3	134	86	26119	375	299	dapE	166	125	ACS96176.1	5
2538	27.4667	23.301	33.9	1.8	3	103	55	23301	375	126	dapE	35	125	QBK47472.1	36
2539	14.1333	30.189	32.7	2.3	1	53	36	30189	375	277	dapE	226	58	BAA92018.1	6
2540	59.2	20.27	32.3	4.1	10	222	145	20270	375	375	dapE	176	328	NP_001185825.1	117
2541	14.1333	30.189	32	4.3	1	53	36	30189	375	277	dapE	226	124	NP_001357183.1	72
2542	14.1333	30.189	32	5.3	1	53	36	30189	375	277	dapE	226	199	BAA91587.1	147
2543	14.1333	30.189	32	5.9	1	53	36	30189	375	277	dapE	226	279	NP_001161971.1	227
2544	50.7772	26.531	32.3	0.98	1	98	71	26531	193	178	dcd	81	152	BAF84204.1	56
2545	46.114	26.966	32.7	1.4	2	89	59	26966	193	185	dcd	99	439	EAW91628.1	355
2546	33.1606	34.375	30.8	5.9	2	64	38	34375	193	162	dcd	99	753	AAD51793.1	694
2547	35.7513	26.087	29.6	9.2	2	69	43	26087	193	98	dcd	32	71	XP_006722324.1	9
2551	37.8698	28.125	31.6	2.2	1	64	33	28125	169	146	def	96	448	XP_016866891.1	385
2552	37.8698	28.125	31.6	2.5	1	64	33	28125	169	146	def	96	448	XP_016866890.1	385
2553	42.6036	30.556	29.6	5.2	3	72	30	30556	169	167	def	116	115	EAX01718.1	44
2554	33.7278	28.07	30.4	5.3	1	57	28	28070	169	139	def	96	441	BAA25199.1	385
2555	42.6036	30.556	30	5.7	3	72	30	30556	169	167	def	116	166	XP_024307010.1	95
2556	42.6036	30.556	29.6	5.7	3	72	30	30556	169	167	def	116	145	EAX01717.1	74
2557	42.6036	30.556	30	5.7	3	72	30	30556	169	167	def	116	188	EAX01719.1	117
2558	33.7278	28.07	30.4	6.3	1	57	28	28070	169	139	def	96	441	BAG35320.1	385
2559	33.7278	28.07	30.4	6.4	1	57	28	28070	169	139	def	96	441	AAH19954.1	385
2560	33.7278	28.07	30.4	6.4	1	57	28	28070	169	139	def	96	441	AAB91559.1	385
2561	33.7278	28.07	30	6.6	1	57	28	28070	169	139	def	96	441	NP_003791.3	385
2562	33.7278	28.07	30	7.1	1	57	28	28070	169	139	def	96	412	BAG58562.1	356
2563	64.497	22.936	30	7.4	3	109	78	22936	169	118	def	10	608	AAH70066.1	506
2564	64.497	22.936	30	7.6	3	109	78	22936	169	118	def	10	608	NP_001271230.1	506
2565	33.7278	28.07	30	7.8	1	57	28	28070	169	139	def	96	213	3S24_A	157
2566	53.2544	26.667	29.6	8.4	3	90	45	26667	169	97	def	28	153	BAG54700.1	65
2567	64.497	22.936	30	8.6	3	109	78	22936	169	118	def	10	608	XP_006715810.1	506
2568	42.6036	30.556	29.6	8.7	3	72	30	30556	169	167	def	116	293	BAD97092.1	222
2569	42.6036	30.556	29.6	8.8	3	72	30	30556	169	167	def	116	293	1HW3_A	222
2570	42.6036	30.556	29.6	8.8	3	72	30	30556	169	167	def	116	305	4O1X_D	234
2571	42.6036	30.556	29.6	8.8	3	72	30	30556	169	167	def	116	305	4KPW_A	234
2572	42.6036	30.556	29.6	8.8	3	72	30	30556	169	167	def	116	305	3N5G_A	234
2573	42.6036	30.556	29.6	8.9	3	72	30	30556	169	167	def	116	268	4JEF_A	197
2574	42.6036	30.556	29.6	9.1	3	72	30	30556	169	167	def	116	293	3EBU_A	222
2575	42.6036	30.556	29.6	9.1	3	72	30	30556	169	167	def	116	293	4GD7_A	222
2576	42.6036	30.556	29.6	9.1	3	72	30	30556	169	167	def	116	270	1HZW_A	199
2577	42.6036	30.556	29.6	9.3	3	72	30	30556	169	167	def	116	305	4O1U_A	234
2578	42.6036	30.556	29.6	9.3	3	72	30	30556	169	167	def	116	293	3EGY_X	222
2579	42.6036	30.556	29.6	9.3	3	72	30	30556	169	167	def	116	305	4O1X_A	234
2580	42.6036	30.556	29.6	9.4	3	72	30	30556	169	167	def	116	268	1HVY_A	197
2581	42.6036	30.556	29.3	9.5	3	72	30	30556	169	167	def	116	210	NP_001341797.1	139
2582	42.6036	30.556	29.6	9.5	3	72	30	30556	169	167	def	116	305	3N5E_A	234
2583	42.6036	30.556	29.6	9.7	3	72	30	30556	169	167	def	116	335	1HW4_A	264
2584	42.6036	30.556	29.6	9.8	3	72	30	30556	169	167	def	116	269	5HS3_A	198
2585	42.6036	30.556	29.6	10	3	72	30	30556	169	167	def	116	305	6QYQ_C	234
2586	42.6036	30.556	29.6	10	3	72	30	30556	169	167	def	116	270	5X5A_A	199
2588	17.7551	34.483	48.9	4.96e-05	0	87	57	34483	490	91	der	5	360	NP_001182351.1	274
2590	17.7551	34.483	48.9	5.09e-05	0	87	57	34483	490	91	der	5	360	BAH12694.1	274
2592	17.7551	34.483	48.1	8.6e-05	0	87	57	34483	490	91	der	5	338	AAH19261.1	252
2594	17.7551	34.483	48.1	8.83e-05	0	87	57	34483	490	91	der	5	338	AAK39555.1	252
2596	17.7551	34.483	48.1	9.06e-05	0	87	57	34483	490	91	der	5	338	NP_116009.2	252
2597	50.6122	25.806	63.5	1.02e-09	6	248	139	25806	490	370	der	155	418	EAW84598.1	184
2598	17.7551	34.483	48.1	7.53e-05	0	87	57	34483	490	91	der	5	343	EAW84598.1	257
2599	36.1224	27.684	63.9	1.04e-09	3	177	106	27684	490	370	der	203	445	NP_598399.2	282
2600	17.7551	34.483	48.1	8.29e-05	0	87	57	34483	490	91	der	5	370	NP_598399.2	284
2601	35.3061	28.324	62.8	1.89e-09	3	173	102	28324	490	370	der	207	445	AAL85492.1	286
2602	17.7551	34.483	48.1	8.22e-05	0	87	57	34483	490	91	der	5	370	AAL85492.1	284
2603	48.3673	26.582	54.3	9.27e-07	7	237	125	26582	490	370	der	155	392	AAK39556.1	184
2604	23.8776	29.06	39.3	0.045	2	117	71	29060	490	121	der	5	356	AAK39556.1	252
2605	48.3673	26.582	53.9	9.88e-07	7	237	125	26582	490	370	der	155	270	AAH08924.3	62
2606	23.8776	29.06	39.3	0.048	2	117	71	29060	490	121	der	5	234	AAH08924.3	130
2607	48.3673	26.582	54.3	9.94e-07	7	237	125	26582	490	370	der	155	392	NP_001122327.1	184
2608	23.8776	29.06	39.3	0.043	2	117	71	29060	490	121	der	5	356	NP_001122327.1	252
2609	33.4694	29.878	53.5	1.49e-06	4	164	90	29878	490	370	der	207	419	EAW84599.1	281
2610	23.8776	29.06	40	0.028	2	117	71	29060	490	121	der	5	383	EAW84599.1	279
2611	26.7347	29.008	43.5	0.002	2	131	89	29008	490	329	der	203	244	BAB56112.1	114
2612	27.9592	28.467	33.1	4.2	3	137	87	28467	490	132	der	5	250	BAB56112.1	116
2613	26.7347	28.244	41.2	0.009	2	131	90	28244	490	329	der	203	250	AAC31604.1	120
2614	11.4286	37.5	32	8.9	0	56	35	37500	490	60	der	5	177	AAC31604.1	122
2615	26.7347	28.244	41.6	0.009	2	131	90	28244	490	329	der	203	250	AAC31603.1	120
2616	11.4286	37.5	32.7	5.5	0	56	35	37500	490	60	der	5	177	AAC31603.1	122
2617	10.6122	42.308	40	0.01	2	52	27	42308	490	54	der	5	75	AAY14779.1	25
2618	10	38.776	31.2	9.7	2	49	25	38776	490	247	der	203	70	AAY14779.1	23
2619	26.7347	28.244	40.8	0.01	2	131	90	28244	490	329	der	203	244	EAW51149.1	114
2620	11.4286	37.5	31.6	8.8	0	56	35	37500	490	60	der	5	171	EAW51149.1	116
2621	26.7347	28.244	41.2	0.011	2	131	90	28244	490	329	der	203	138	EAW51146.1	8
2622	27.9592	28.467	33.1	3.4	3	137	87	28467	490	132	der	5	144	EAW51146.1	10
2623	26.7347	28.244	41.2	0.011	2	131	90	28244	490	329	der	203	244	NP_005693.1	114
2624	11.4286	37.5	32.7	5.7	0	56	35	37500	490	60	der	5	171	NP_005693.1	116
2625	26.7347	28.244	41.2	0.011	2	131	90	28244	490	329	der	203	251	AAG12978.1	121
2626	11.4286	37.5	32.7	5.5	0	56	35	37500	490	60	der	5	178	AAG12978.1	123
2627	10.6122	42.308	40.8	0.012	2	52	27	42308	490	54	der	5	75	BAG59026.1	25
2628	6.93878	52.941	41.2	0.013	0	34	16	52941	490	38	der	5	288	NP_061940.1	255
2629	7.34694	41.667	33.1	4.1	0	36	21	41667	490	238	der	203	288	NP_061940.1	253
2630	6.93878	52.941	41.2	0.014	0	34	16	52941	490	38	der	5	222	EAW93184.1	189
2631	7.34694	41.667	33.1	4.2	0	36	21	41667	490	238	der	203	222	EAW93184.1	187
2632	6.93878	52.941	41.2	0.014	0	34	16	52941	490	38	der	5	288	AAH03603.1	255
2633	7.34694	41.667	33.1	4.5	0	36	21	41667	490	238	der	203	288	AAH03603.1	253
2634	10.6122	42.308	40.4	0.014	2	52	27	42308	490	54	der	5	75	AAH13925.1	25
2635	12.8571	33.333	40.4	0.016	0	63	42	33333	490	265	der	203	176	NP_001304915.1	114
2636	11.4286	37.5	32.7	5.4	0	56	35	37500	490	60	der	5	171	NP_001304915.1	116
2637	24.4898	26.667	39.7	0.018	2	120	82	26667	490	121	der	5	194	XP_016868804.1	78
2638	45.102	25.339	40.8	0.02	10	221	118	25339	490	370	der	177	241	BAB14507.1	41
2639	10.6122	42.308	40.4	0.02	2	52	27	42308	490	54	der	5	75	NP_037473.3	25
2640	10.6122	42.308	40.4	0.021	2	52	27	42308	490	54	der	5	75	AAD44500.1	25
2641	10.6122	42.308	40.4	0.022	2	52	27	42308	490	54	der	5	75	CAB66481.1	25
2642	10.6122	42.308	40	0.023	2	52	27	42308	490	54	der	5	75	NP_001315617.1	25
2643	26.9388	28.788	39.7	0.032	4	132	87	28788	490	329	der	203	243	NP_001304914.1	114
2644	24.4898	26.667	38.1	0.046	2	120	82	26667	490	121	der	5	125	2HT6_A	9
2645	24.4898	26.667	38.5	0.051	2	120	82	26667	490	121	der	5	156	2G3Y_A	40
2646	18.7755	34.783	38.9	0.057	4	92	54	34783	490	94	der	5	152	XP_005256556.1	65
2647	18.7755	34.783	38.9	0.057	4	92	54	34783	490	94	der	5	152	NP_001379.1	65
2648	24.4898	26.667	38.1	0.058	2	120	82	26667	490	121	der	5	125	2CJW_A	9
2649	18.7755	34.783	38.9	0.063	4	92	54	34783	490	94	der	5	152	AAH00493.1	65
2650	10.6122	40.385	38.9	0.064	2	52	28	40385	490	54	der	5	75	BAB55174.1	25
2651	18.7755	34.783	38.5	0.067	4	92	54	34783	490	94	der	5	152	XP_011522006.1	65
2652	18.7755	34.783	38.5	0.068	4	92	54	34783	490	94	der	5	152	NP_001317073.1	65
2653	33.2653	30.675	37.7	0.069	7	163	96	30675	490	158	der	7	157	XP_024307638.1	1
2654	24.4898	26.667	38.1	0.078	2	120	82	26667	490	121	der	5	194	NP_005252.1	78
2655	8.77551	39.535	38.5	0.08	1	43	24	39535	490	243	der	203	429	EAW78036.1	387
2656	7.14286	42.857	32.3	7.4	0	35	20	42857	490	38	der	4	422	EAW78036.1	388
2657	8.77551	39.535	38.5	0.087	1	43	24	39535	490	243	der	203	271	XP_016862285.1	229
2658	7.14286	42.857	33.1	4.5	0	35	20	42857	490	38	der	4	264	XP_016862285.1	230
2659	8.77551	39.535	38.5	0.091	1	43	24	39535	490	243	der	203	429	EAW78035.1	387
2660	7.14286	42.857	32.3	7.2	0	35	20	42857	490	38	der	4	422	EAW78035.1	388
2661	24.4898	26.667	37.4	0.091	2	120	82	26667	490	121	der	5	125	2CJW_B	9
2662	8.77551	39.535	38.5	0.094	1	43	24	39535	490	243	der	203	429	AAH40119.1	387
2663	7.14286	42.857	32.3	6.8	0	35	20	42857	490	38	der	4	422	AAH40119.1	388
2664	8.77551	39.535	38.5	0.096	1	43	24	39535	490	243	der	203	429	CAB66831.1	387
2665	7.14286	42.857	32.7	6.8	0	35	20	42857	490	38	der	4	422	CAB66831.1	388
2666	8.77551	39.535	38.5	0.096	1	43	24	39535	490	243	der	203	429	NP_060855.2	387
2667	7.14286	42.857	32.3	6.9	0	35	20	42857	490	38	der	4	422	NP_060855.2	388
2668	8.77551	39.535	38.5	0.096	1	43	24	39535	490	243	der	203	429	BAA92116.1	387
2669	7.14286	42.857	32.7	6.7	0	35	20	42857	490	38	der	4	422	BAA92116.1	388
2670	24.4898	27.5	38.1	0.096	2	120	81	27500	490	121	der	5	194	AAC50067.1	78
2671	8.77551	39.535	38.5	0.097	1	43	24	39535	490	243	der	203	429	AAH15042.1	387
2672	7.14286	42.857	32.3	6.8	0	35	20	42857	490	38	der	4	422	AAH15042.1	388
2673	8.77551	39.535	38.5	0.1	1	43	24	39535	490	243	der	203	429	EAW78039.1	387
2674	7.14286	42.857	32.3	6.9	0	35	20	42857	490	38	der	4	422	EAW78039.1	388
2675	45.102	24.887	38.1	0.11	10	221	119	24887	490	370	der	177	241	NP_068746.2	41
2676	53.2653	24.138	38.1	0.12	12	261	141	24138	490	260	der	50	433	NP_001310552.1	180
2677	15.7143	28.571	32.3	9	1	77	52	28571	490	81	der	5	454	NP_001310552.1	381
2678	45.102	24.887	38.1	0.13	10	221	119	24887	490	370	der	177	241	NP_001332797.1	41
2679	7.34694	47.222	36.6	0.21	0	36	19	47222	490	238	der	203	51	BAG57062.1	16
2680	7.14286	45.714	32	7.5	0	35	19	45714	490	38	der	4	51	BAG57062.1	17
2681	53.2653	24.138	37.4	0.22	12	261	141	24138	490	260	der	50	274	XP_024302359.1	21
2682	15.7143	28.571	32.3	8.1	1	77	52	28571	490	81	der	5	295	XP_024302359.1	222
2683	44.6939	23.744	37.4	0.25	8	219	126	23744	490	260	der	50	365	NP_037417.1	180
2684	26.9388	28.03	36.6	0.28	4	132	81	28030	490	131	der	5	216	AAB17064.1	94
2685	7.34694	47.222	37	0.28	0	36	19	47222	490	238	der	203	258	BAG60340.1	223
2686	7.55102	45.946	32	9.5	0	37	20	45946	490	38	der	2	258	BAG60340.1	222
2687	7.34694	47.222	37	0.28	0	36	19	47222	490	238	der	203	258	BAH14762.1	223
2688	7.55102	45.946	32	9.3	0	37	20	45946	490	38	der	2	258	BAH14762.1	222
2689	18.7755	30.435	36.6	0.29	3	92	59	30435	490	90	der	1	226	AAH04923.3	138
2690	7.34694	47.222	37	0.3	0	36	19	47222	490	238	der	203	270	AAH63657.1	235
2691	7.34694	47.222	36.6	0.3	0	36	19	47222	490	238	der	203	210	BAC54927.1	175
2692	18.7755	30.435	36.6	0.31	3	92	59	30435	490	90	der	1	235	BAC04573.1	147
2693	18.7755	30.435	36.6	0.31	3	92	59	30435	490	90	der	1	235	AAI07715.1	147
2694	7.34694	47.222	36.6	0.31	0	36	19	47222	490	238	der	203	219	AAA66492.1	184
2695	7.34694	47.222	36.6	0.31	0	36	19	47222	490	238	der	203	210	BAB63327.1	175
2696	18.7755	30.435	36.6	0.34	3	92	59	30435	490	90	der	1	235	NP_149098.2	147
2697	46.1224	24.336	36.6	0.34	9	226	116	24336	490	260	der	50	365	AAH00107.1	180
2698	7.34694	47.222	36.6	0.34	0	36	19	47222	490	238	der	203	396	NP_005266.2	361
2699	7.34694	47.222	36.6	0.35	0	36	19	47222	490	238	der	203	394	BAG63768.1	359
2700	7.34694	47.222	36.6	0.35	0	36	19	47222	490	238	der	203	381	BAF31262.1	346
2701	7.34694	47.222	36.6	0.35	0	36	19	47222	490	238	der	203	396	AQY76831.1	361
2702	13.0612	40.625	35.4	0.38	3	64	34	40625	490	259	der	198	63	BAA11211.1	2
2703	13.0612	40.625	35.4	0.38	3	64	34	40625	490	259	der	198	63	AAH66307.1	2
2704	36.7347	22.778	36.2	0.39	5	180	112	22778	490	364	der	204	283	NP_054889.2	112
2705	25.3061	26.613	35.4	0.53	4	124	81	26613	490	121	der	3	229	NP_054889.2	111
2706	13.0612	40.625	35.4	0.4	3	64	34	40625	490	259	der	198	63	NP_005605.1	2
2707	33.8776	24.096	36.6	0.41	6	166	104	24096	490	156	der	3	336	AAM14617.1	181
2708	13.0612	40.625	35.4	0.42	3	64	34	40625	490	259	der	198	63	3T5G_A	2
2709	13.0612	39.063	35	0.42	2	64	35	39063	490	259	der	198	63	5YXH_A	2
2710	13.0612	40.625	35.4	0.42	3	64	34	40625	490	259	der	198	63	BAF82059.1	2
2711	13.0612	39.063	35	0.43	2	64	35	39063	490	259	der	198	64	6BSX_A	3
2712	33.8776	24.096	36.6	0.44	6	166	104	24096	490	156	der	3	336	NP_002444.2	181
2713	18.7755	30.435	36.2	0.44	3	92	59	30435	490	90	der	1	255	EAW76878.1	167
2714	13.0612	39.063	35	0.45	2	64	35	39063	490	259	der	198	63	1XTQ_A	2
2715	25.102	31.707	36.2	0.46	6	123	73	31707	490	121	der	7	276	AAC24364.1	157
2716	33.6735	23.636	36.2	0.49	6	165	106	23636	490	156	der	3	336	AAH39848.1	181
2717	33.8776	24.096	35.8	0.52	6	166	104	24096	490	156	der	3	336	AAH64977.1	181
2718	34.2857	30.357	35.8	0.58	7	168	100	30357	490	158	der	2	401	XP_006723837.1	240
2719	43.6735	23.832	35.8	0.58	8	214	122	23832	490	260	der	55	182	NP_001310553.1	2
2720	15.7143	28.571	32.3	8.4	1	77	52	28571	490	81	der	5	203	NP_001310553.1	130
2721	33.4694	30.488	35.8	0.59	7	164	97	30488	490	158	der	6	385	NP_056481.1	228
2722	33.4694	30.488	35.8	0.6	7	164	97	30488	490	158	der	6	385	BAA91783.1	228
2723	33.4694	30.488	35.8	0.61	7	164	97	30488	490	158	der	6	413	XP_016883294.1	256
2724	33.6735	30.303	35.8	0.61	7	165	98	30303	490	158	der	5	378	EAW75387.1	220
2725	12.8571	30.159	35	0.66	2	63	37	30159	490	260	der	202	67	EAW54106.1	8
2726	38.5714	25.397	35.8	0.69	8	189	100	25397	490	370	der	205	191	XP_024309946.1	21
2727	12.8571	30.159	35.4	0.73	2	63	37	30159	490	260	der	202	67	NP_694968.1	8
2728	19.5918	27.083	34.7	0.74	3	96	65	27083	490	368	der	273	116	AAG03013.1	26
2729	12.8571	30.159	35	0.75	2	63	37	30159	490	260	der	202	72	3ZJC_A	13
2730	20.4082	25	35.4	0.81	2	100	69	25000	490	296	der	200	348	AAF09482.1	252
2731	17.7551	31.034	33.5	2.9	3	87	54	31034	490	329	der	244	186	AAF09482.1	105
2732	20.4082	25	35.4	0.84	2	100	69	25000	490	296	der	200	336	EAW65250.1	240
2733	17.7551	31.034	33.9	2.5	3	87	54	31034	490	329	der	244	174	EAW65250.1	93
2734	20.4082	25	35.4	0.87	2	100	69	25000	490	296	der	200	348	AAV74413.1	252
2735	32.0408	26.115	34.3	2.1	5	157	101	26115	490	329	der	183	186	AAV74413.1	35
2736	20.4082	25	35.4	0.91	2	100	69	25000	490	296	der	200	349	EAW65249.1	253
2737	17.7551	31.034	33.9	2.6	3	87	54	31034	490	329	der	244	187	EAW65249.1	106
2738	20.4082	25	35.4	0.91	2	100	69	25000	490	296	der	200	336	NP_996561.1	240
2739	17.7551	31.034	33.9	2.6	3	87	54	31034	490	329	der	244	174	NP_996561.1	93
2740	20.4082	25	35.4	0.92	2	100	69	25000	490	296	der	200	348	EAW65251.1	252
2741	17.7551	31.034	33.9	2.4	3	87	54	31034	490	329	der	244	186	EAW65251.1	105
2742	20.4082	25	35	0.96	2	100	69	25000	490	296	der	200	348	AAH01024.1	252
2743	17.7551	31.034	33.9	2.4	3	87	54	31034	490	329	der	244	186	AAH01024.1	105
2744	20.4082	25	35	0.96	2	100	69	25000	490	296	der	200	348	NP_055181.3	252
2745	17.7551	31.034	33.9	2.4	3	87	54	31034	490	329	der	244	186	NP_055181.3	105
2746	26.9388	28.03	33.9	0.99	4	132	81	28030	490	131	der	5	127	3Q72_A	5
2747	20.4082	25	35	1	2	100	69	25000	490	296	der	200	348	BAB55169.1	252
2748	17.7551	31.034	33.9	2.4	3	87	54	31034	490	329	der	244	186	BAB55169.1	105
2749	13.0612	39.063	34.3	1.1	2	64	35	39063	490	259	der	198	85	2ATV_A	24
2750	26.9388	28.03	33.9	1.1	4	132	81	28030	490	131	der	5	132	2DPX_A	10
2751	25.102	31.707	35	1.2	6	123	73	31707	490	121	der	7	292	EAW86527.1	173
2752	25.102	31.707	35	1.2	6	123	73	31707	490	121	der	7	292	BAA91752.1	173
2753	25.102	31.707	35	1.2	6	123	73	31707	490	121	der	7	292	BAD96581.1	173
2754	25.102	31.707	35	1.2	6	123	73	31707	490	121	der	7	292	EAW86528.1	173
2755	26.9388	28.03	33.9	1.3	4	132	81	28030	490	131	der	5	132	2GJS_A	10
2756	25.102	31.707	35	1.3	6	123	73	31707	490	121	der	7	292	NP_036473.2	173
2757	13.0612	39.063	33.9	1.4	2	64	35	39063	490	259	der	198	63	NP_116307.1	2
2758	25.102	31.707	34.7	1.4	6	123	73	31707	490	121	der	7	292	AAD09830.1	173
2759	25.102	31.707	34.7	1.4	6	123	73	31707	490	121	der	7	290	AAH33784.1	171
2760	25.102	31.707	34.3	1.8	6	123	73	31707	490	121	der	7	245	BAH13539.1	126
2761	41.2245	22.772	33.5	1.8	7	202	118	22772	490	243	der	50	192	BAG60601.1	21
2762	5.71429	53.571	32.7	2	0	28	13	53571	490	238	der	211	29	B44370	2
2763	6.53061	40.625	33.1	2.1	0	32	19	40625	490	38	der	7	149	EAW55006.1	118
2764	25.102	27.642	33.5	2.7	5	123	73	27642	490	121	der	1	255	EAW76879.1	147
2765	25.102	31.707	33.9	2.8	6	123	73	31707	490	121	der	7	176	BAG58224.1	57
2766	25.102	31.707	33.5	2.9	6	123	73	31707	490	121	der	7	176	BAG63575.1	57
2767	6.12245	53.333	33.5	3	0	30	14	53333	490	238	der	209	193	BAG63202.1	164
2768	26.9388	28.03	33.1	3.2	4	132	81	28030	490	131	der	5	216	NP_004156.1	94
2769	11.0204	37.037	32.7	3.4	2	54	31	37037	490	257	der	205	73	3NEY_A	22
2770	26.9388	28.03	33.1	3.7	4	132	81	28030	490	131	der	5	216	BAF83302.1	94
2771	13.6735	37.313	32	4.6	2	67	38	37313	490	268	der	204	69	1CLU_A	5
2772	11.0204	37.037	32.7	4.6	2	54	31	37037	490	257	der	205	210	XP_011529471.1	159
2773	17.551	29.07	32.3	4.6	2	86	57	29070	490	259	der	176	98	NP_853510.1	15
2774	11.0204	37.037	32.7	5	2	54	31	37037	490	257	der	205	233	EAW72659.1	182
2775	7.55102	45.946	31.6	5.2	1	37	18	45946	490	232	der	198	50	XP_005254491.1	14
2776	13.6735	37.313	32	5.3	2	67	38	37313	490	268	der	204	69	1JAH_A	5
2777	13.0612	31.25	32.7	6	3	64	36	31250	490	258	der	203	164	AAH07003.1	101
2778	13.0612	31.25	32.7	6.1	3	64	36	31250	490	258	der	203	164	BAG35778.1	101
2779	13.0612	31.25	32.7	6.1	3	64	36	31250	490	258	der	203	164	ACF75748.1	101
2780	13.0612	31.25	32.7	6.2	3	64	36	31250	490	258	der	203	164	ACF75749.1	101
2781	13.0612	31.25	32.7	6.2	3	64	36	31250	490	258	der	203	164	NP_003232.2	101
2782	13.0612	31.25	32.7	6.3	3	64	36	31250	490	258	der	203	164	AAC50516.1	101
2783	13.0612	31.25	32.7	6.3	3	64	36	31250	490	258	der	203	164	ACF75750.1	101
2784	14.0816	31.884	32.3	6.4	3	69	38	31884	490	260	der	197	103	NP_001350461.1	39
2785	11.0204	37.037	32.3	6.5	2	54	31	37037	490	257	der	205	319	BAG65337.1	268
2786	11.0204	37.037	32.3	6.5	2	54	31	37037	490	257	der	205	319	NP_001159932.1	268
2787	14.0816	31.884	32.3	6.6	3	69	38	31884	490	260	der	197	89	NP_060796.1	25
2788	14.0816	31.884	32.3	6.6	3	69	38	31884	490	260	der	197	103	BAG62967.1	39
2789	11.0204	37.037	32.3	6.7	2	54	31	37037	490	257	der	205	336	BAD97116.1	285
2790	7.55102	45.946	31.6	6.7	1	37	18	45946	490	232	der	198	50	XP_016877785.1	14
2791	13.0612	31.25	32.7	6.7	3	64	36	31250	490	258	der	203	209	XP_011532344.1	146
2792	11.0204	37.037	32.3	6.8	2	54	31	37037	490	257	der	205	336	NP_002427.1	285
2793	11.0204	37.037	32.3	6.8	2	54	31	37037	490	257	der	205	306	NP_001159934.1	255
2794	7.55102	45.946	32	6.9	1	37	18	45946	490	232	der	198	50	NP_057647.1	14
2795	11.0204	37.037	32.3	6.9	2	54	31	37037	490	257	der	205	316	NP_001159933.1	265
2796	11.0204	37.037	32.3	7.2	2	54	31	37037	490	257	der	205	316	AAV35469.1	265
2797	13.0612	31.25	32.3	7.8	3	64	36	31250	490	258	der	203	96	BAG62235.1	33
2798	14.0816	31.884	31.6	8.8	3	69	38	31884	490	260	der	197	88	3LXX_A	24
2799	18.1633	28.09	32.3	9.7	3	89	51	28090	490	216	der	141	1370	XP_011524481.1	1282
2800	18.1633	28.09	32.3	9.8	3	89	51	28090	490	216	der	141	1261	XP_016881483.1	1173
2801	18.1633	28.09	32.3	9.9	3	89	51	28090	490	216	der	141	1342	XP_016881480.1	1254
2808	25.1232	33.333	58.5	1.48e-09	1	102	66	33333	406	174	dfp	75	112	AAG14955.1	11
2809	38.67	28.025	55.5	4.19e-08	4	157	80	28025	406	162	dfp	8	145	XP_016877950.1	20
2810	22.1675	31.111	50.8	1.38e-06	1	90	60	31111	406	162	dfp	75	120	XP_016877951.1	31
2811	41.3793	26.786	42.4	0.001	4	168	81	26786	406	174	dfp	8	146	NP_001288030.1	20
2812	14.2857	32.759	31.2	2.1	0	58	39	32759	406	174	dfp	117	66	NP_001288034.1	9
2813	32.266	28.244	33.1	3.7	4	131	80	28244	406	244	dfp	122	372	XP_011517442.1	248
2814	11.33	36.957	32.3	3.8	1	46	27	36957	406	234	dfp	191	83	NP_001274440.1	38
2815	11.33	36.957	32.7	3.8	1	46	27	36957	406	234	dfp	191	85	1P9O_A	40
2816	32.266	28.244	33.1	3.9	4	131	80	28244	406	244	dfp	122	370	XP_011517440.1	246
2817	32.266	28.244	33.1	3.9	4	131	80	28244	406	244	dfp	122	372	NP_116277.2	248
2818	11.33	36.957	32.7	3.9	1	46	27	36957	406	234	dfp	191	83	NP_078940.2	38
2819	32.266	28.244	33.1	3.9	4	131	80	28244	406	244	dfp	122	372	XP_006717371.1	248
2820	32.266	28.244	33.1	3.9	4	131	80	28244	406	244	dfp	122	372	EAW87414.1	248
2821	11.33	36.957	32.3	4.2	1	46	27	36957	406	234	dfp	191	83	BAB13931.1	38
2822	32.266	28.244	32.7	5.7	4	131	80	28244	406	244	dfp	122	372	XP_011517444.1	248
2823	32.266	28.244	32.3	6.2	4	131	80	28244	406	244	dfp	122	372	XP_011517446.1	248
2824	32.266	28.244	32.3	6.2	4	131	80	28244	406	244	dfp	122	372	XP_011517445.1	248
2825	14.2857	32.759	30.8	7.1	0	58	39	32759	406	174	dfp	117	114	NP_001288032.1	57
2826	18.9655	32.468	31.6	7.9	2	77	48	32468	406	272	dfp	196	93	XP_011508125.1	21
2827	18.9655	29.87	31.6	9.3	1	77	50	29870	406	272	dfp	196	93	XP_011508121.1	21
2828	18.9655	29.87	31.6	9.6	1	77	50	29870	406	272	dfp	196	93	XP_016857424.1	21
2829	45.1852	32.787	30	3.8	2	61	30	32787	135	126	dicA	75	155	XP_011507836.1	97
2830	33.3333	35.556	29.6	5.5	0	45	29	35556	135	111	dicA	67	969	NP_003990.1	925
2831	33.3333	35.556	29.6	5.5	0	45	29	35556	135	111	dicA	67	970	NP_001310435.1	926
2832	81.4815	26.364	29.6	6.3	4	110	68	26364	135	134	dicA	30	346	CAH10350.1	245
2833	80.7407	26.606	28.9	9.5	4	109	69	26606	135	134	dicA	30	385	NP_003761.3	284
2834	18.8437	28.409	35.4	0.79	4	88	49	28409	467	251	dnaA	168	341	XP_016866549.1	264
2835	20.5567	30.208	35	0.84	5	96	37	30208	467	251	dnaA	168	341	XP_005249289.1	264
2836	20.5567	30.208	33.9	2.3	5	96	37	30208	467	251	dnaA	168	341	BAG52937.1	264
2837	20.5567	30.208	33.9	2.4	5	96	37	30208	467	251	dnaA	168	341	BAD97313.1	264
2838	20.5567	30.208	33.9	2.5	5	96	37	30208	467	251	dnaA	168	341	NP_064520.2	264
2839	20.5567	30.208	33.9	2.6	5	96	37	30208	467	251	dnaA	168	322	BAD92960.1	245
2840	18.8437	28.409	33.1	3.9	4	88	49	28409	467	251	dnaA	168	121	AAF80563.1	44
2841	18.2013	25.882	33.1	4.2	3	85	58	25882	467	140	dnaA	58	137	XP_011515665.1	56
2842	31.9058	25.503	32.7	5.4	6	149	86	25503	467	226	dnaA	83	985	AAF23275.2	857
2843	10.9208	35.294	32	6.1	1	51	32	35294	467	187	dnaA	137	238	EAW92880.1	189
2844	20.5567	30.208	32.3	7.2	5	96	37	30208	467	251	dnaA	168	341	BAB60709.1	264
2845	18.2013	30.588	32	9.9	4	85	32	30588	467	240	dnaA	168	333	NP_569079.1	264
2846	29.7959	35.616	32.3	0.64	4	73	37	35616	245	200	dnaC	134	92	2EAO_A	24
2847	39.5918	30.928	32.7	2.2	5	97	47	30928	245	188	dnaC	103	423	XP_016856868.1	336
2848	23.6735	29.31	31.2	6.8	1	58	36	29310	245	152	dnaC	100	707	XP_016856868.1	650
2849	39.5918	30.928	32.7	2.3	5	97	47	30928	245	188	dnaC	103	283	NP_996671.1	196
2850	23.6735	29.31	31.2	7.2	1	58	36	29310	245	152	dnaC	100	567	NP_996671.1	510
2851	39.5918	30.928	32.7	2.3	5	97	47	30928	245	188	dnaC	103	283	BAG60956.1	196
2852	23.6735	29.31	31.2	7.1	1	58	36	29310	245	152	dnaC	100	567	BAG60956.1	510
2853	39.5918	30.928	32.7	2.3	5	97	47	30928	245	188	dnaC	103	345	XP_016856872.1	258
2854	23.6735	29.31	31.2	7.1	1	58	36	29310	245	152	dnaC	100	629	XP_016856872.1	572
2855	39.5918	30.928	32.7	2.4	5	97	47	30928	245	188	dnaC	103	389	BAG59590.1	302
2856	23.6735	29.31	31.2	6.2	1	58	36	29310	245	152	dnaC	100	673	BAG59590.1	616
2857	39.5918	30.928	32.7	2.4	5	97	47	30928	245	188	dnaC	103	389	NP_002524.2	302
2858	23.6735	29.31	31.2	6.2	1	58	36	29310	245	152	dnaC	100	673	NP_002524.2	616
2859	39.5918	30.928	32.7	2.4	5	97	47	30928	245	188	dnaC	103	271	XP_016856875.1	184
2860	23.6735	29.31	31.2	7.5	1	58	36	29310	245	152	dnaC	100	555	XP_016856875.1	498
2861	33.0612	33.333	32.3	2.5	4	81	40	33333	245	178	dnaC	103	282	NP_001230076.1	211
2862	23.6735	29.31	31.6	5.5	1	58	36	29310	245	152	dnaC	100	582	NP_001230076.1	525
2863	39.5918	30.928	32.3	2.5	5	97	47	30928	245	188	dnaC	103	220	EAW69715.1	133
2864	23.6735	29.31	31.2	6.3	1	58	36	29310	245	152	dnaC	100	504	EAW69715.1	447
2865	39.5918	30.928	32.3	2.7	5	97	47	30928	245	188	dnaC	103	192	AAH12105.1	105
2866	23.6735	29.31	31.2	6.9	1	58	36	29310	245	152	dnaC	100	476	AAH12105.1	419
2867	29.7959	35.616	32.3	2.7	4	73	37	35616	245	200	dnaC	134	544	BAG53024.1	476
2868	29.7959	35.616	32.3	2.9	4	73	37	35616	245	200	dnaC	134	1031	XP_016861356.1	963
2869	40	26.531	32.3	3	4	98	52	26531	245	188	dnaC	102	121	6MCK_A	33
2870	29.7959	35.616	32.3	3.1	4	73	37	35616	245	200	dnaC	134	961	EAW79129.1	893
2871	29.7959	35.616	32.3	3.1	4	73	37	35616	245	200	dnaC	134	983	NP_004432.1	915
2872	29.7959	35.616	32.3	3.1	4	73	37	35616	245	200	dnaC	134	983	AAI11745.1	915
2873	29.7959	35.616	32.3	3.1	4	73	37	35616	245	200	dnaC	134	983	BAF83897.1	915
2874	29.7959	35.616	32.3	3.2	4	73	37	35616	245	200	dnaC	134	1015	XP_024309157.1	947
2875	29.7959	35.616	32.3	3.2	4	73	37	35616	245	200	dnaC	134	1037	XP_016861355.1	969
2876	40	26.531	32	3.9	4	98	52	26531	245	188	dnaC	102	167	AAH07562.2	79
2877	40	26.531	31.6	4.3	4	98	52	26531	245	188	dnaC	102	267	AAG29873.1	179
2878	40	26.531	32	4.4	4	98	52	26531	245	188	dnaC	102	329	AAI21795.1	241
2879	40	26.531	31.6	4.4	4	98	52	26531	245	188	dnaC	102	284	NP_001341857.1	196
2880	40	26.531	31.6	4.6	4	98	52	26531	245	188	dnaC	102	330	5IFW_B	242
2881	40	26.531	31.6	4.6	4	98	52	26531	245	188	dnaC	102	329	NP_009057.1	241
2882	40	26.531	31.6	4.8	4	98	52	26531	245	188	dnaC	102	328	5C18_A	240
2883	40	26.531	31.6	4.8	4	98	52	26531	245	188	dnaC	102	329	BAG35235.1	241
2884	40	26.531	31.6	5	4	98	52	26531	245	188	dnaC	102	328	5C19_A	240
2885	40	26.531	31.6	5.3	4	98	52	26531	245	188	dnaC	102	329	5DYG_A	241
2886	40	26.531	31.2	5.8	4	98	52	26531	245	188	dnaC	102	329	5KIY_A	241
2887	43.6735	21.495	31.2	5.8	1	107	71	21495	245	200	dnaC	107	527	XP_024305237.1	421
2888	43.6735	21.495	31.2	5.8	1	107	71	21495	245	200	dnaC	107	520	XP_024305238.1	414
2889	40	26.531	31.2	5.9	4	98	52	26531	245	188	dnaC	102	284	EAW58403.1	196
2890	40	26.531	31.2	6.3	4	98	52	26531	245	188	dnaC	102	329	4KLN_A	241
2891	40	26.531	31.2	6.4	4	98	52	26531	245	188	dnaC	102	329	5DYI_A	241
2892	40	26.531	31.2	6.5	4	98	52	26531	245	188	dnaC	102	329	3HU2_A	241
2893	40	26.531	31.2	6.7	4	98	52	26531	245	188	dnaC	102	329	3HU1_A	241
2894	40	26.531	31.2	6.8	4	98	52	26531	245	188	dnaC	102	329	3HU3_A	241
2895	40	26.531	31.2	6.8	4	98	52	26531	245	188	dnaC	102	329	5IFS_B	241
2896	23.6735	29.31	31.2	7	1	58	36	29310	245	152	dnaC	100	734	XP_016856873.1	677
2897	23.6735	29.31	31.2	7	1	58	36	29310	245	152	dnaC	100	734	XP_016856874.1	677
2898	23.6735	29.31	31.2	7	1	58	36	29310	245	152	dnaC	100	700	XP_011542498.1	643
2899	23.6735	29.31	31.2	7.5	1	58	36	29310	245	152	dnaC	100	734	XP_016856867.1	677
2900	23.6735	29.31	30.8	7.9	1	58	36	29310	245	152	dnaC	100	656	XP_016856870.1	599
2901	23.6735	29.31	30.8	8	1	58	36	29310	245	152	dnaC	100	734	XP_016856869.1	677
2902	23.6735	29.31	30.8	8.1	1	58	36	29310	245	152	dnaC	100	484	NP_001230075.1	427
2903	23.6735	29.31	30.8	8.3	1	58	36	29310	245	152	dnaC	100	594	XP_011542500.1	537
2904	33.0612	28.395	30.8	8.7	3	81	40	28395	245	171	dnaC	103	721	CAA80355.1	647
2905	33.0612	28.395	30.8	8.7	3	81	40	28395	245	171	dnaC	103	721	NP_002904.3	647
2906	23.6735	29.31	30.8	8.7	1	58	36	29310	245	152	dnaC	100	582	XP_011542501.1	525
2907	33.0612	28.395	30.8	8.8	3	81	40	28395	245	171	dnaC	103	722	AAA16121.1	648
2908	33.0612	28.395	30.8	8.9	3	81	40	28395	245	171	dnaC	103	722	NP_001191676.1	648
2909	33.0612	28.395	30.8	8.9	3	81	40	28395	245	171	dnaC	103	722	AAH51786.1	648
2910	33.0612	28.395	30.8	9.2	3	81	40	28395	245	171	dnaC	103	696	NP_001350425.1	622
2911	33.0612	28.395	30.8	9.3	3	81	40	28395	245	171	dnaC	103	695	NP_001350424.1	621
2912	33.0612	28.395	30.8	9.3	3	81	40	28395	245	171	dnaC	103	606	EAW92922.1	532
2913	15.9184	33.333	30.4	9.3	1	39	24	33333	245	140	dnaC	102	199	AAL75948.1	163
2914	3.62069	33.333	33.1	2.2	0	42	28	33333	1160	388	dnaE	347	87	CAE54364.1	46
2915	3.62069	33.333	33.1	2.2	0	42	28	33333	1160	388	dnaE	347	87	CAE54363.1	46
2916	12.5862	26.712	34.7	4	7	146	84	26712	1160	491	dnaE	352	448	EAW59264.1	320
2917	12.4138	22.917	33.5	9	5	144	90	22917	1160	364	dnaE	231	480	EAW59246.1	348
2918	12.4138	22.917	33.5	9	5	144	90	22917	1160	364	dnaE	231	480	NP_060818.4	348
2919	12.4138	22.917	33.5	9.2	5	144	90	22917	1160	364	dnaE	231	480	BAA92047.1	348
2920	12.4138	22.917	33.5	9.2	5	144	90	22917	1160	364	dnaE	231	480	AAH35005.1	348
2921	12.4138	22.917	33.5	9.3	5	144	90	22917	1160	364	dnaE	231	296	BAB14452.1	164
2922	2.5	44.828	31.2	9.9	0	29	16	44828	1160	388	dnaE	360	87	AAT96511.1	59
2923	8.43373	34.694	30.4	9.8	2	49	23	34694	581	84	dnaG	45	51	4KDT_C	3
2931	43.3904	20.789	59.7	1.93e-08	6	279	188	20789	643	275	dnaX	9	300	NP_002907.1	43
2932	37.9471	22.541	58.2	5.28e-08	6	244	160	22541	643	242	dnaX	9	267	EAW78171.1	43
2933	30.3266	25.641	57.4	5.45e-08	4	195	140	25641	643	313	dnaX	120	224	NP_001333744.1	34
2934	30.4821	25.51	57.4	5.63e-08	4	196	142	25510	643	313	dnaX	120	227	NP_001123584.1	34
2935	31.1042	26	56.6	9.96e-08	6	200	136	26000	643	313	dnaX	120	227	BAF83796.1	34
2936	36.0809	22.845	55.8	3.38e-07	4	232	155	22845	643	237	dnaX	9	251	BAG70182.1	41
2937	36.0809	22.845	55.8	3.53e-07	4	232	155	22845	643	237	dnaX	9	251	NP_852136.1	41
2938	18.818	27.273	49.7	1.83e-05	1	121	87	27273	643	237	dnaX	117	150	NP_001265720.1	31
2939	18.818	27.273	49.7	1.89e-05	1	121	87	27273	643	237	dnaX	117	148	NP_001265721.1	29
2940	16.0187	29.126	43.9	0.002	0	103	73	29126	643	222	dnaX	120	231	XP_011533474.1	129
2941	16.0187	29.126	43.5	0.002	0	103	73	29126	643	222	dnaX	120	231	XP_011533477.1	129
2942	16.0187	29.126	43.5	0.002	0	103	73	29126	643	222	dnaX	120	231	XP_016876172.1	129
2943	16.0187	29.126	43.5	0.002	0	103	73	29126	643	222	dnaX	120	231	XP_011533476.1	129
2944	16.0187	29.126	43.5	0.002	0	103	73	29126	643	222	dnaX	120	231	XP_016876171.1	129
2945	16.0187	29.126	43.5	0.002	0	103	73	29126	643	222	dnaX	120	231	XP_011533475.1	129
2946	16.0187	29.126	43.5	0.003	0	103	73	29126	643	222	dnaX	120	231	NP_853536.2	129
2947	16.0187	29.126	42.7	0.004	0	103	73	29126	643	222	dnaX	120	231	BAG59158.1	129
2948	16.0187	29.126	42.7	0.004	0	103	73	29126	643	222	dnaX	120	231	XP_016876169.1	129
2949	16.0187	29.126	42.4	0.007	0	103	73	29126	643	222	dnaX	120	231	NP_002906.1	129
2950	16.0187	29.126	42	0.008	0	103	73	29126	643	222	dnaX	120	231	AAV38474.1	129
2951	16.0187	29.126	42	0.008	0	103	73	29126	643	222	dnaX	120	231	BAD96292.1	129
2952	15.5521	28	40.4	0.023	1	100	71	28000	643	237	dnaX	138	217	NP_002905.2	119
2953	15.5521	28	40	0.024	1	100	71	28000	643	237	dnaX	138	114	XP_006716143.1	16
2954	15.5521	28	39.7	0.028	1	100	71	28000	643	237	dnaX	138	116	NP_001265722.1	18
2955	23.7947	25.49	38.5	0.031	6	153	82	25490	643	157	dnaX	9	149	EAW98116.1	25
2956	11.6641	33.333	35	1.1	2	75	32	33333	643	400	dnaX	344	178	XP_024308006.1	104
2957	17.4184	29.464	35	1.3	3	112	65	29464	643	220	dnaX	122	360	NP_001308120.1	250
2958	17.4184	29.464	35	1.3	3	112	65	29464	643	220	dnaX	122	371	NP_001308119.1	261
2959	17.4184	29.464	35	1.5	3	112	65	29464	643	220	dnaX	122	405	NP_006657.1	295
2960	18.0404	29.31	34.7	1.8	3	116	68	29310	643	224	dnaX	122	306	3UK6_A	192
2961	16.3297	31.429	33.1	6.9	4	105	53	31429	643	448	dnaX	355	684	NP_001020108.1	588
2962	23.7947	27.451	33.1	6.9	7	153	81	27451	643	509	dnaX	364	11551	EAX11013.1	11422
2963	16.3297	31.429	33.1	7.1	4	105	53	31429	643	448	dnaX	355	684	AAV41830.1	588
2964	16.3297	31.429	33.1	7.8	4	105	53	31429	643	448	dnaX	355	713	XP_016880194.1	617
2965	16.3297	31.429	32.7	8.2	4	105	53	31429	643	448	dnaX	355	704	AAH34673.1	608
2966	16.3297	31.429	32.7	8.5	4	105	53	31429	643	448	dnaX	355	730	XP_016880193.1	634
2967	16.3297	31.429	32.7	8.8	4	105	53	31429	643	448	dnaX	355	733	XP_006721594.1	637
2968	16.3297	31.429	32.7	8.8	4	105	53	31429	643	448	dnaX	355	733	XP_006721595.1	637
2969	16.3297	31.429	32.7	9.1	4	105	53	31429	643	448	dnaX	355	701	XP_011522208.1	605
2970	16.3297	31.429	32.7	9.1	4	105	53	31429	643	448	dnaX	355	704	NP_722549.2	608
2971	8.08709	28.846	32.7	9.8	2	52	33	28846	643	409	dnaX	361	788	AAL04412.1	738
2972	8.08709	28.846	32.7	9.8	2	52	33	28846	643	409	dnaX	361	788	AAK01435.1	738
2973	8.08709	28.846	32.7	9.8	2	52	33	28846	643	409	dnaX	361	788	AAL04414.1	738
2974	8.08709	28.846	32.7	9.8	2	52	33	28846	643	409	dnaX	361	788	AAK01434.1	738
2975	8.08709	28.846	32.7	9.8	2	52	33	28846	643	409	dnaX	361	788	AAK01432.1	738
2976	8.08709	28.846	32.7	9.8	2	52	33	28846	643	409	dnaX	361	788	AAL04415.1	738
2977	8.08709	28.846	32.7	9.8	2	52	33	28846	643	409	dnaX	361	788	NP_775082.2	738
2978	8.08709	28.846	32.7	9.8	2	52	33	28846	643	409	dnaX	361	788	AAL04413.1	738
2979	8.08709	28.846	32.7	9.8	2	52	33	28846	643	409	dnaX	361	788	AAK01436.1	738
2980	8.08709	28.846	32.7	9.8	2	52	33	28846	643	409	dnaX	361	788	AAK01431.1	738
2981	8.08709	28.846	32.7	9.8	2	52	33	28846	643	409	dnaX	361	788	AAL04411.1	738
2982	8.08709	28.846	32.7	9.8	2	52	33	28846	643	409	dnaX	361	788	NP_003377.2	738
2983	8.08709	28.846	32.7	9.8	2	52	33	28846	643	409	dnaX	361	788	AAK01433.1	738
2984	8.08709	28.846	32.7	9.9	2	52	33	28846	643	409	dnaX	361	788	AAL04410.1	738
2993	78.8079	31.092	48.5	2.48e-06	7	119	70	31092	151	139	dut	25	111	AAY87452.1	1
2994	74.8344	30.973	47.8	3.17e-06	1	113	75	30973	151	124	dut	12	214	EAW69787.1	105
2995	72.8477	32.727	45.4	2.52e-05	5	110	63	32727	151	120	dut	12	217	EAW77352.1	118
2996	80.1325	31.405	45.1	4.2e-05	7	121	71	31405	151	139	dut	23	170	AAD21096.1	58
2997	72.1854	28.44	42	0.000164	3	109	70	28440	151	124	dut	16	110	BAC85476.1	10
2998	62.2517	29.787	40	0.003	5	94	59	29787	151	127	dut	35	757	P63128.3	670
2999	80.7947	29.508	38.9	0.005	6	122	65	29508	151	130	dut	16	179	BAB85007.1	72
3000	74.1722	29.464	39.3	0.005	6	112	69	29464	151	126	dut	19	756	AAD51793.1	651
3001	83.4437	28.571	38.9	0.007	8	126	75	28571	151	139	dut	18	772	AAD51791.1	658
3002	42.3841	37.5	38.1	0.012	3	64	35	37500	151	126	dut	63	416	XP_016863086.1	358
3003	42.3841	37.5	38.1	0.012	3	64	35	37500	151	126	dut	63	506	XP_016863084.1	448
3004	42.3841	37.5	37.7	0.015	3	64	35	37500	151	126	dut	63	577	XP_016863085.1	519
3005	42.3841	37.5	37.7	0.015	3	64	35	37500	151	126	dut	63	643	XP_011532627.1	585
3006	74.1722	28.571	37.4	0.025	6	112	70	28571	151	126	dut	19	756	AAD51796.1	651
3007	62.2517	28.723	35.8	0.077	5	94	60	28723	151	127	dut	35	757	AAD51797.1	670
3008	19.8675	40	28.9	9.1	0	30	18	40000	151	43	dut	14	85	NP_001341357.1	56
3009	19.8675	40	28.9	9.4	0	30	18	40000	151	43	dut	14	86	NP_001341356.1	57
3010	19.8675	40	28.9	10	0	30	18	40000	151	43	dut	14	93	NP_001341355.1	64
3011	12.8141	33.333	32.3	2.4	2	51	28	33333	398	253	dxr	203	146	EAX03675.1	102
3012	22.8643	21.978	32	6.5	1	91	68	21978	398	384	dxr	297	179	XP_011534200.1	89
3044	43.2258	23.134	62.4	2.13e-09	9	268	180	23134	620	574	dxs	331	280	3EXE_B	15
3045	43.2258	23.134	62.4	2.2e-09	9	268	180	23134	620	574	dxs	331	282	6CER_B	17
3046	43.2258	23.134	62	2.5e-09	9	268	180	23134	620	574	dxs	331	268	EAW65372.1	3
3047	43.2258	23.134	62	2.78e-09	9	268	180	23134	620	574	dxs	331	286	AAA60054.1	21
3048	43.2258	23.134	62.4	2.84e-09	9	268	180	23134	620	574	dxs	331	310	NP_000916.2	45
3049	43.2258	23.134	62	2.88e-09	9	268	180	23134	620	574	dxs	331	292	2OZL_B	27
3050	43.2258	23.134	62.4	2.91e-09	9	268	180	23134	620	574	dxs	331	310	AAA60053.1	45
3051	43.2258	23.134	62.4	2.91e-09	9	268	180	23134	620	574	dxs	331	310	AAA88097.1	45
3052	43.2258	23.134	62	3.15e-09	9	268	180	23134	620	574	dxs	331	292	NP_001302465.1	27
3053	66.9355	22.41	57.4	1.5e-07	17	415	228	22410	620	497	dxs	130	410	EAW72753.1	43
3054	66.9355	22.41	57	1.81e-07	17	415	228	22410	620	497	dxs	130	466	EAW72751.1	99
3055	66.9355	22.41	57	2.01e-07	17	415	228	22410	620	497	dxs	130	466	EAW72749.1	99
3056	22.9032	29.577	52.4	1.08e-06	5	142	90	29577	620	569	dxs	436	140	CAD39002.1	1
3057	41.9355	21.923	53.9	1.15e-06	8	260	175	21923	620	574	dxs	331	292	NP_001166939.1	45
3058	42.4194	22.814	50.4	1.76e-05	9	263	177	22814	620	569	dxs	331	287	1NI4_B	27
3059	37.5806	21.459	47.4	0.000149	9	233	161	21459	620	574	dxs	361	276	BAG65195.1	47
3060	37.5806	21.459	46.6	0.000261	9	233	161	21459	620	574	dxs	361	327	CAA36685.1	98
3061	38.0645	21.61	46.6	0.000261	9	236	163	21610	620	577	dxs	361	349	XP_011534327.1	117
3062	37.4194	21.552	46.6	0.000273	9	232	160	21552	620	573	dxs	361	295	2J9F_B	67
3063	37.4194	21.552	46.6	0.000276	9	232	160	21552	620	573	dxs	361	275	NP_001305904.1	47
3064	37.4194	21.552	46.2	0.000316	9	232	160	21552	620	573	dxs	361	295	1DTW_B	67
3065	37.4194	21.552	46.2	0.000409	9	232	160	21552	620	573	dxs	361	345	NP_000047.1	117
3066	37.9032	21.277	46.2	0.000435	9	235	163	21277	620	576	dxs	361	348	XP_005248813.1	117
3067	37.2581	21.645	45.8	0.000477	8	231	161	21645	620	573	dxs	361	295	1OLX_B	67
3068	37.4194	21.552	45.8	0.000531	9	232	160	21552	620	573	dxs	361	345	XP_011534325.1	117
3069	37.4194	21.552	45.8	0.000537	9	232	160	21552	620	573	dxs	361	345	XP_011534326.1	117
3070	21.2903	25	38.5	0.099	1	132	85	25000	620	243	dxs	126	213	CAN88919.1	82
3071	20.6452	25.781	37.4	0.17	1	128	81	25781	620	243	dxs	130	172	ABQ58815.1	45
3072	9.67742	33.333	37.7	0.21	0	60	40	33333	620	189	dxs	130	271	NP_001166925.1	212
3073	20.6452	25.781	37.4	0.21	1	128	81	25781	620	243	dxs	130	293	3EXE_A	166
3074	9.67742	33.333	37.4	0.23	0	60	40	33333	620	189	dxs	130	225	3EXI_A	166
3075	9.67742	33.333	37.4	0.23	0	60	40	33333	620	189	dxs	130	240	NP_001166926.1	181
3076	9.67742	33.333	37.4	0.23	0	60	40	33333	620	189	dxs	130	208	6CFO_A	149
3077	9.67742	33.333	37.4	0.23	0	60	40	33333	620	189	dxs	130	208	6CER_A	149
3078	9.67742	33.333	37.4	0.23	0	60	40	33333	620	189	dxs	130	208	2OZL_A	149
3079	9.67742	33.333	37.4	0.24	0	60	40	33333	620	189	dxs	130	257	AAA60055.1	198
3080	20.6452	25.781	37.4	0.24	1	128	81	25781	620	243	dxs	130	301	BAG35194.1	174
3081	9.67742	33.333	37.4	0.27	0	60	40	33333	620	189	dxs	130	233	BAD96460.1	174
3082	9.67742	33.333	37.4	0.27	0	60	40	33333	620	189	dxs	130	233	BAD96708.1	174
3083	9.67742	33.333	37	0.29	0	60	40	33333	620	189	dxs	130	233	NP_000275.1	174
3084	9.67742	33.333	37	0.32	0	60	40	33333	620	189	dxs	130	208	1NI4_A	149
3085	22.5806	22.857	35.8	0.33	5	140	92	22857	620	508	dxs	383	159	BAD92478.1	22
3086	20.6452	25.781	37	0.35	1	128	81	25781	620	243	dxs	130	293	3EXF_A	166
3087	9.67742	33.333	36.2	0.49	0	60	40	33333	620	189	dxs	130	225	3EXH_C	166
3088	14.3548	30.337	35.8	0.59	3	89	49	30337	620	187	dxs	105	191	ALQ33820.1	110
3089	17.2581	27.103	35.8	0.84	1	107	76	27103	620	228	dxs	124	249	AAA35590.1	143
3090	9.35484	32.759	35.4	0.88	0	58	39	32759	620	189	dxs	132	233	AAB59581.1	176
3091	17.2581	27.103	35	1.4	1	107	76	27103	620	228	dxs	124	294	BAG60459.1	188
3092	17.2581	27.103	34.7	1.5	1	107	76	27103	620	228	dxs	124	271	2BFF_A	165
3093	17.2581	27.103	34.7	1.6	1	107	76	27103	620	228	dxs	124	271	2J9F_A	165
3094	17.2581	27.103	34.7	1.6	1	107	76	27103	620	228	dxs	124	271	1V11_A	165
3095	17.2581	27.103	34.7	1.6	1	107	76	27103	620	228	dxs	124	271	1OLU_A	165
3096	17.2581	27.103	34.7	1.6	1	107	76	27103	620	228	dxs	124	271	1X80_A	165
3097	17.2581	27.103	34.7	1.6	1	107	76	27103	620	228	dxs	124	271	1DTW_A	165
3098	17.2581	27.103	34.7	1.6	1	107	76	27103	620	228	dxs	124	271	2BFB_A	165
3099	17.2581	27.103	34.7	1.6	1	107	76	27103	620	228	dxs	124	271	1X7W_A	165
3100	17.2581	27.103	34.7	1.6	1	107	76	27103	620	228	dxs	124	271	1X7X_A	165
3101	17.2581	27.103	34.7	1.6	1	107	76	27103	620	228	dxs	124	271	1X7Z_A	165
3102	17.2581	27.103	34.7	1.6	1	107	76	27103	620	228	dxs	124	271	1V1M_A	165
3103	17.2581	27.103	34.7	1.7	1	107	76	27103	620	228	dxs	124	271	1V16_A	165
3104	17.4194	26.852	34.7	1.7	1	108	77	26852	620	229	dxs	124	316	AAB59549.1	209
3105	17.2581	27.103	34.7	1.7	1	107	76	27103	620	228	dxs	124	271	1X7Y_A	165
3106	17.2581	27.103	34.7	1.7	1	107	76	27103	620	228	dxs	124	271	2BFE_A	165
3107	17.2581	27.103	34.7	1.7	1	107	76	27103	620	228	dxs	124	271	2BFD_A	165
3108	17.2581	27.103	34.7	1.7	1	107	76	27103	620	228	dxs	124	271	2BFC_A	165
3109	17.2581	27.103	34.7	1.8	1	107	76	27103	620	228	dxs	124	314	AAB20222.2	208
3110	17.2581	27.103	34.7	1.8	1	107	76	27103	620	228	dxs	124	316	NP_000700.1	210
3111	7.09677	38.636	31.6	1.9	1	44	26	38636	620	187	dxs	145	46	CAE46212.1	3
3112	17.2581	27.103	34.7	1.9	1	107	76	27103	620	228	dxs	124	314	AAB19268.2	208
3113	17.2581	27.103	34.7	1.9	1	107	76	27103	620	228	dxs	124	316	BAG36106.1	210
3114	17.2581	27.103	33.9	3.7	1	107	76	27103	620	228	dxs	124	350	BAC87051.1	244
3115	10.1613	30.159	33.1	5.2	0	63	44	30159	620	186	dxs	124	272	NP_001158255.1	210
3116	13.871	29.07	33.1	5.4	4	86	47	29070	620	498	dxs	424	253	EAW68721.1	171
3117	10.1613	30.159	32.7	6.3	0	63	44	30159	620	186	dxs	124	272	CAH56215.1	210
3118	13.871	29.07	32.7	8.3	4	86	47	29070	620	498	dxs	424	323	AAA52704.1	241
3119	13.871	29.07	32.3	8.7	4	86	47	29070	620	498	dxs	424	324	NP_000604.1	242
3120	13.871	29.07	32.3	8.9	4	86	47	29070	620	498	dxs	424	324	BAG36404.1	242
3121	13.871	29.07	32.3	9.1	4	86	47	29070	620	498	dxs	424	301	CAA26382.1	219
3165	23.1481	26	32.7	5.6	4	100	59	26000	432	94	eno	4	161	XP_006717898.1	68
3167	23.1481	26	32.7	5.2	4	100	59	26000	432	94	eno	4	161	NP_001229628.1	68
3169	23.1481	26	32.7	5.4	4	100	59	26000	432	94	eno	4	161	XP_011538099.1	68
3173	23.1481	26	33.1	3.8	4	100	59	26000	432	94	eno	4	161	XP_016871730.1	68
3174	39.1204	28.994	59.7	1.21e-08	4	169	97	28994	432	252	eno	107	402	XP_011538101.1	234
3175	23.1481	26	32.7	4.1	4	100	59	26000	432	94	eno	4	161	XP_011538101.1	68
3176	39.1204	28.994	59.3	1.6e-08	4	169	97	28994	432	252	eno	107	402	XP_005269872.1	234
3177	23.1481	26	32.7	4.4	4	100	59	26000	432	94	eno	4	161	XP_005269872.1	68
3178	12.2685	45.283	47.4	6.46e-06	0	53	29	45283	432	416	eno	364	68	EAW49440.1	16
3179	21.9907	29.474	43.9	0.000209	1	95	66	29474	432	363	eno	269	123	EAX02150.1	30
3180	5.32407	56.522	31.6	0.59	0	23	10	56522	432	226	eno	204	25	AAB25950.1	3
3190	44.8505	28.148	54.3	1.39e-07	0	135	97	28148	301	281	era	147	242	EAW51148.1	108
3191	61.4618	28.649	48.1	2.47e-05	6	185	104	28649	301	179	era	11	323	EAW76879.1	151
3192	53.1561	26.25	46.2	3.82e-05	5	160	104	26250	301	165	era	13	153	XP_024307638.1	1
3193	53.4884	26.087	46.6	9.97e-05	5	161	105	26087	301	165	era	12	397	XP_006723837.1	244
3194	53.4884	26.087	46.6	0.000104	5	161	105	26087	301	165	era	12	374	EAW75387.1	221
3195	53.4884	26.087	46.6	0.000109	5	161	105	26087	301	165	era	12	381	BAA91783.1	228
3196	53.4884	26.087	46.2	0.000111	5	161	105	26087	301	165	era	12	381	NP_056481.1	228
3197	53.4884	26.087	46.2	0.000129	5	161	105	26087	301	165	era	12	409	XP_016883294.1	256
3198	61.794	29.57	45.4	0.000173	7	186	99	29570	301	175	era	10	240	EAW76881.1	67
3199	65.4485	27.411	45.4	0.000236	6	197	109	27411	301	175	era	11	345	BAC04573.1	151
3200	65.4485	27.411	45.4	0.000247	6	197	109	27411	301	175	era	11	345	AAI07715.1	151
3201	65.4485	27.411	45.4	0.000249	6	197	109	27411	301	175	era	11	345	NP_149098.2	151
3202	66.7774	26.866	45.1	0.000276	6	201	113	26866	301	179	era	11	340	AAH04923.3	142
3203	66.7774	26.866	45.1	0.000307	6	201	113	26866	301	179	era	11	369	EAW76878.1	171
3204	67.1096	27.723	42.4	0.002	7	202	108	27723	301	175	era	10	266	NP_001036182.1	67
3205	67.1096	27.723	42.4	0.002	7	202	108	27723	301	175	era	10	266	AAN76513.1	67
3206	63.4551	27.225	39.7	0.01	6	191	105	27225	301	175	era	17	190	AAD15550.2	2
3207	11.6279	51.429	39.3	0.015	0	35	17	51429	301	45	era	11	52	BAG57062.1	18
3208	37.5415	29.204	39.7	0.015	4	113	65	29204	301	114	era	11	172	BAG60204.1	66
3209	37.5415	29.204	39.7	0.015	4	113	65	29204	301	114	era	11	136	BAA92115.1	30
3210	37.5415	29.204	39.7	0.015	4	113	65	29204	301	114	era	11	136	NP_060854.2	30
3211	37.5415	29.204	39.3	0.019	4	113	65	29204	301	114	era	11	212	NP_001290559.1	106
3212	37.5415	29.204	39.3	0.022	4	113	65	29204	301	114	era	11	176	BAB70958.1	70
3213	11.6279	51.429	39.3	0.023	0	35	17	51429	301	45	era	11	211	BAB63327.1	177
3214	11.6279	51.429	39.3	0.023	0	35	17	51429	301	45	era	11	271	AAH63657.1	237
3215	11.6279	51.429	39.3	0.023	0	35	17	51429	301	45	era	11	220	AAA66492.1	186
3216	11.6279	51.429	39.3	0.024	0	35	17	51429	301	45	era	11	259	BAG60340.1	225
3217	11.6279	51.429	39.3	0.024	0	35	17	51429	301	45	era	11	259	BAH14762.1	225
3218	11.6279	51.429	38.9	0.026	0	35	17	51429	301	45	era	11	211	BAC54927.1	177
3219	37.5415	29.204	38.9	0.029	4	113	65	29204	301	114	era	11	340	NP_001186506.1	234
3220	11.6279	51.429	38.9	0.029	0	35	17	51429	301	45	era	11	395	BAG63768.1	361
3221	11.6279	51.429	38.9	0.03	0	35	17	51429	301	45	era	11	397	AQY76831.1	363
3222	11.6279	51.429	38.9	0.031	0	35	17	51429	301	45	era	11	397	NP_005266.2	363
3223	11.6279	51.429	38.9	0.034	0	35	17	51429	301	45	era	11	382	BAF31262.1	348
3224	55.4817	23.353	38.5	0.045	5	167	103	23353	301	166	era	11	335	NP_002444.2	183
3225	55.4817	23.353	38.5	0.048	5	167	103	23353	301	166	era	11	335	AAM14617.1	183
3226	55.4817	23.353	38.1	0.054	5	167	103	23353	301	166	era	11	335	AAH39848.1	183
3227	55.4817	23.353	38.1	0.056	5	167	103	23353	301	166	era	11	335	AAH64977.1	183
3228	21.5947	33.846	37	0.13	2	65	26	33846	301	68	era	11	443	EAW78036.1	389
3229	21.5947	33.846	37	0.14	2	65	26	33846	301	68	era	11	443	EAW78035.1	389
3230	21.5947	33.846	36.6	0.17	2	65	26	33846	301	68	era	11	285	XP_016862285.1	231
3231	21.5947	33.846	36.6	0.18	2	65	26	33846	301	68	era	11	443	AAH15042.1	389
3232	21.5947	33.846	36.6	0.18	2	65	26	33846	301	68	era	11	443	BAA92116.1	389
3233	21.5947	33.846	36.6	0.2	2	65	26	33846	301	68	era	11	443	AAH40119.1	389
3234	21.5947	33.846	36.6	0.2	2	65	26	33846	301	68	era	11	443	CAB66831.1	389
3235	21.5947	33.846	36.6	0.2	2	65	26	33846	301	68	era	11	443	NP_060855.2	389
3236	21.5947	33.846	36.2	0.21	2	65	26	33846	301	68	era	11	443	EAW78039.1	389
3237	10.299	51.613	35.8	0.31	0	31	15	51613	301	45	era	15	194	BAG63202.1	164
3238	9.63455	51.724	33.9	0.38	0	29	14	51724	301	45	era	17	30	B44370	2
3239	36.2126	26.606	35	0.51	4	109	72	26606	301	112	era	11	548	EAW54108.1	441
3240	36.2126	26.606	35	0.52	4	109	72	26606	301	112	era	11	339	XP_005250008.1	232
3241	36.2126	26.606	35	0.55	4	109	72	26606	301	112	era	11	548	NP_783161.1	441
3242	18.6047	33.929	34.7	0.69	0	56	37	33929	301	66	era	11	329	BAH12694.1	274
3243	18.6047	33.929	34.7	0.72	0	56	37	33929	301	66	era	11	329	NP_001182351.1	274
3244	18.6047	33.929	34.7	0.75	0	56	37	33929	301	66	era	11	334	EAW84599.1	279
3245	18.6047	33.929	34.3	0.88	0	56	37	33929	301	66	era	11	312	EAW84598.1	257
3246	18.6047	33.929	34.3	0.99	0	56	37	33929	301	66	era	11	307	NP_116009.2	252
3247	18.6047	33.929	33.9	1	0	56	37	33929	301	66	era	11	185	AAH08924.3	130
3248	18.6047	33.929	34.3	1	0	56	37	33929	301	66	era	11	307	AAK39555.1	252
3249	18.6047	33.929	34.3	1	0	56	37	33929	301	66	era	11	307	AAH19261.1	252
3250	18.6047	33.929	33.9	1.1	0	56	37	33929	301	66	era	11	339	NP_598399.2	284
3251	18.6047	33.929	33.9	1.1	0	56	37	33929	301	66	era	11	339	AAL85492.1	284
3252	18.6047	33.929	33.9	1.1	0	56	37	33929	301	66	era	11	307	NP_001122327.1	252
3253	18.6047	33.929	33.9	1.2	0	56	37	33929	301	66	era	11	307	AAK39556.1	252
3254	12.6246	47.368	33.5	1.4	2	38	14	47368	301	44	era	7	141	AAH35721.1	110
3255	12.6246	47.368	33.1	1.5	2	38	14	47368	301	44	era	7	112	AAH00920.1	81
3256	12.6246	47.368	33.1	1.5	2	38	14	47368	301	44	era	7	134	BAG54121.1	103
3257	12.6246	47.368	33.1	1.7	2	38	14	47368	301	44	era	7	196	AAH04409.1	165
3258	12.6246	47.368	33.1	1.8	2	38	14	47368	301	44	era	7	175	AAH26039.1	144
3259	12.6246	47.368	33.1	1.8	2	38	14	47368	301	44	era	7	175	NP_612393.2	144
3260	18.9369	36.842	33.5	1.9	3	57	33	36842	301	66	era	11	209	AAC24364.1	155
3261	12.6246	47.368	33.1	1.9	2	38	14	47368	301	44	era	7	175	BAC11327.1	144
3262	12.6246	47.368	33.1	1.9	2	38	14	47368	301	44	era	7	215	EAW61348.1	184
3263	18.9369	36.842	33.1	2.4	3	57	33	36842	301	66	era	11	178	BAH13539.1	124
3264	18.9369	36.842	33.1	2.5	3	57	33	36842	301	66	era	11	225	EAW86527.1	171
3265	38.8704	24.786	33.1	2.5	4	117	71	24786	301	189	era	78	295	EAW60923.1	191
3266	18.9369	36.842	33.1	2.5	3	57	33	36842	301	66	era	11	225	BAA91752.1	171
3267	18.9369	36.842	33.1	2.5	3	57	33	36842	301	66	era	11	225	BAD96581.1	171
3268	18.9369	36.842	33.1	2.5	3	57	33	36842	301	66	era	11	225	EAW86528.1	171
3269	18.9369	36.842	33.1	2.5	3	57	33	36842	301	66	era	11	225	AAD09830.1	171
3270	18.9369	36.842	33.1	2.5	3	57	33	36842	301	66	era	11	225	NP_036473.2	171
3271	18.9369	36.842	32.7	2.7	3	57	33	36842	301	66	era	11	223	AAH33784.1	169
3272	18.9369	36.842	32.7	2.9	3	57	33	36842	301	66	era	11	109	BAG58224.1	55
3273	18.9369	36.842	32.7	3	3	57	33	36842	301	66	era	11	109	BAG63575.1	55
3274	55.814	22.024	32	4.6	6	168	96	22024	301	158	era	11	265	NP_054889.2	113
3275	10.299	35.484	32	5.2	0	31	20	35484	301	124	era	94	294	EAW60248.1	264
3276	53.1561	24.375	31.2	5.4	7	160	99	24375	301	163	era	13	161	2BMD_A	15
3277	10.299	35.484	32	5.9	0	31	20	35484	301	124	era	94	397	CAH10627.2	367
3278	10.299	35.484	31.6	6	0	31	20	35484	301	124	era	94	397	AAC50787.1	367
3279	10.299	35.484	31.6	6	0	31	20	35484	301	124	era	94	397	CAG30318.1	367
3280	53.1561	24.375	30.8	6.2	7	160	99	24375	301	163	era	13	159	1Z0K_A	13
3281	10.299	35.484	31.6	6.7	0	31	20	35484	301	124	era	94	389	BAG64169.1	359
3282	10.299	35.484	31.6	6.8	0	31	20	35484	301	124	era	94	476	NP_006377.2	446
3283	10.299	35.484	31.6	6.8	0	31	20	35484	301	124	era	94	476	NP_001091974.1	446
3284	10.299	35.484	31.6	7.8	0	31	20	35484	301	124	era	94	478	BAD92832.1	448
3285	10.299	35.484	31.2	8	0	31	20	35484	301	124	era	94	397	EAW60242.1	367
3286	27.5748	27.711	29.6	8.5	1	83	49	27711	301	285	era	214	100	AXA12907.1	18
3287	43.5216	29.008	30.8	8.6	8	131	68	29008	301	127	era	11	155	BAB55008.1	36
3288	8.9701	51.852	30.8	9.4	1	27	11	51852	301	33	era	7	158	EAW61349.1	134
3289	33.2226	25	30.8	9.5	3	100	70	25000	301	106	era	11	114	3ZJC_A	16
3300	27.193	54.839	39.7	7.46e-05	0	31	14	54839	114	114	erpA	84	31	EAW84862.1	1
3301	50.8772	36.207	33.9	0.072	2	58	32	36207	114	105	erpA	48	78	ACS96393.1	26
3302	50.8772	37.931	33.5	0.08	2	58	31	37931	114	105	erpA	48	81	CAL03731.1	29
3303	50.8772	36.207	33.1	0.11	2	58	32	36207	114	105	erpA	48	65	AAZ08989.1	13
3304	51.7544	35.593	33.1	0.12	2	59	33	35593	114	105	erpA	47	78	AAC51069.1	25
3305	50.8772	34.483	30.4	0.96	3	58	32	34483	114	105	erpA	48	70	QDF61787.1	19
3306	50.8772	36.207	30.4	0.97	3	58	31	36207	114	105	erpA	48	80	CAL04219.1	29
3307	48.2456	36.364	30.4	1.1	2	55	30	36364	114	102	erpA	48	78	CAL03857.1	29
3308	50.8772	31.034	29.6	1.7	2	58	35	31034	114	105	erpA	48	81	CAL06387.1	29
3309	50.8772	32.759	29.6	1.7	2	58	34	32759	114	105	erpA	48	81	CAL04889.1	29
3310	50.8772	34.483	29.6	1.9	2	58	33	34483	114	105	erpA	48	81	CAL05459.1	29
3311	50.8772	36.207	29.6	2	2	58	32	36207	114	105	erpA	48	78	AGP00814.1	26
3312	50.8772	31.034	29.3	3.1	2	58	35	31034	114	105	erpA	48	78	ACS96192.1	26
3313	50.8772	31.034	29.3	3.3	2	58	35	31034	114	105	erpA	48	88	CAD60341.1	36
3314	50.8772	31.034	28.9	3.9	2	58	35	31034	114	105	erpA	48	88	CAD60335.1	36
3315	55.2632	28.571	28.5	6.4	2	63	36	28571	114	105	erpA	43	77	ADX65710.1	24
3316	50.8772	32.759	28.1	7.3	2	58	34	32759	114	105	erpA	48	80	ABF83246.1	28
3317	44.7368	33.333	28.5	8.1	2	51	32	33333	114	105	erpA	55	77	ACF36859.1	29
3318	50.8772	34.483	28.1	9.9	2	58	33	34483	114	105	erpA	48	97	QCP57681.1	45
3324	46.0591	25.134	60.1	7.39e-09	3	187	130	25134	406	180	fabB	2	226	NP_001138863.1	42
3332	15.0246	29.508	34.7	1.2	1	61	36	29508	406	148	fabB	88	62	NP_001318063.1	9
3333	15.0246	29.508	33.9	1.3	1	61	36	29508	406	148	fabB	88	106	EAW84863.1	53
3334	15.0246	29.508	34.3	1.4	1	61	36	29508	406	148	fabB	88	74	NP_001318062.1	21
3335	15.0246	29.508	34.3	1.5	1	61	36	29508	406	148	fabB	88	138	BAC11185.1	85
3336	15.0246	29.508	34.3	1.6	1	61	36	29508	406	148	fabB	88	138	NP_066385.2	85
3337	15.0246	29.508	33.9	1.6	1	61	36	29508	406	148	fabB	88	138	AAC26844.1	85
3338	15.0246	29.508	33.5	1.9	1	61	36	29508	406	148	fabB	88	138	EAW84864.1	85
3339	15.0246	29.508	33.9	1.9	1	61	36	29508	406	148	fabB	88	168	AAH14148.2	115
3340	34.7291	28.369	32	8.4	7	141	76	28369	406	355	fabB	229	213	XP_016862916.1	84
3341	34.7291	28.369	32	8.5	7	141	76	28369	406	355	fabB	229	300	BAG63715.1	171
3342	34.7291	28.369	32	9.1	7	141	76	28369	406	355	fabB	229	335	XP_016862914.1	206
3348	29.4498	35.165	33.9	1.8	4	91	50	35165	309	171	fabD	82	653	AAA73576.1	571
3349	29.4498	34.066	32.7	2.8	4	91	51	34066	309	171	fabD	82	255	2JFK_A	173
3350	49.5146	24.837	32.7	3.2	9	153	80	24837	309	144	fabD	7	139	NP_001337553.1	7
3351	49.5146	24.837	32.3	3.5	9	153	80	24837	309	144	fabD	7	139	XP_011533998.1	7
3352	49.5146	24.837	32.3	3.7	9	153	80	24837	309	144	fabD	7	139	XP_016866162.1	7
3353	49.5146	24.837	32.3	3.7	9	153	80	24837	309	144	fabD	7	139	XP_011533999.1	7
3354	49.5146	24.837	32.3	3.7	9	153	80	24837	309	144	fabD	7	139	EAW47447.1	7
3355	29.4498	34.066	32.3	4.1	4	91	51	34066	309	171	fabD	82	255	2JFD_A	173
3356	49.5146	24.837	31.6	4.5	9	153	80	24837	309	144	fabD	7	139	BAG56695.1	7
3357	49.5146	24.837	32.3	4.6	9	153	80	24837	309	144	fabD	7	139	XP_016866152.1	7
3358	29.4498	34.066	32.3	4.6	4	91	51	34066	309	171	fabD	82	653	AAH63242.1	571
3359	29.4498	34.066	32.3	4.6	4	91	51	34066	309	171	fabD	82	653	EAW89745.1	571
3360	29.4498	34.066	32.3	4.6	4	91	51	34066	309	171	fabD	82	653	NP_004095.4	571
3361	49.5146	24.837	32	4.7	9	153	80	24837	309	144	fabD	7	139	XP_016866161.1	7
3362	29.4498	34.066	32.3	4.7	4	91	51	34066	309	171	fabD	82	653	AAS09886.1	571
3363	29.4498	34.066	32	5	4	91	51	34066	309	171	fabD	82	655	3HHD_A	573
3364	49.5146	24.837	32	5.2	9	153	80	24837	309	144	fabD	7	139	XP_011533996.1	7
3365	49.5146	24.837	32	5.6	9	153	80	24837	309	144	fabD	7	139	XP_016866156.1	7
3366	49.5146	24.837	32	5.6	9	153	80	24837	309	144	fabD	7	139	XP_011533995.1	7
3367	49.5146	24.837	32	5.8	9	153	80	24837	309	144	fabD	7	139	XP_016866157.1	7
3368	49.5146	24.837	31.6	6.6	9	153	80	24837	309	144	fabD	7	139	XP_016866159.1	7
3369	49.5146	24.837	31.6	7	9	153	80	24837	309	144	fabD	7	139	XP_011533986.1	7
3370	49.5146	24.837	31.6	7.2	9	153	80	24837	309	144	fabD	7	139	XP_011533984.1	7
3371	49.5146	24.837	31.6	7.5	9	153	80	24837	309	144	fabD	7	139	EAW47449.1	7
3372	49.5146	24.837	31.6	7.6	9	153	80	24837	309	144	fabD	7	139	XP_011533994.1	7
3373	49.5146	24.837	31.6	7.6	9	153	80	24837	309	144	fabD	7	139	XP_011533989.1	7
3374	49.5146	24.837	31.6	7.6	9	153	80	24837	309	144	fabD	7	139	XP_016866149.1	7
3375	49.5146	24.837	31.6	7.7	9	153	80	24837	309	144	fabD	7	139	EAW47450.1	7
3376	49.5146	24.837	31.6	7.7	9	153	80	24837	309	144	fabD	7	139	XP_011533987.1	7
3377	49.5146	24.837	31.6	8	9	153	80	24837	309	144	fabD	7	139	XP_011533992.1	7
3378	49.5146	24.837	31.6	8.1	9	153	80	24837	309	144	fabD	7	139	XP_011533993.1	7
3379	49.5146	24.837	31.6	8.6	9	153	80	24837	309	144	fabD	7	139	XP_016866148.1	7
3380	49.5146	24.837	31.2	8.6	9	153	80	24837	309	144	fabD	7	139	A2RRH5.3	7
3381	49.5146	24.837	31.2	8.7	9	153	80	24837	309	144	fabD	7	139	NP_872358.4	7
3382	49.5146	24.837	31.2	9.1	9	153	80	24837	309	144	fabD	7	139	EAW47448.1	7
3623	66.8033	28.221	58.5	1.41e-09	3	163	110	28221	244	166	fabG	4	160	CAG33590.1	5
3624	46.7213	29.825	57.4	1.55e-09	2	114	74	29825	244	190	fabG	78	115	NP_001180565.1	7
3625	68.0328	28.313	58.5	1.6e-09	6	166	106	28313	244	165	fabG	7	189	BAG56833.1	30
3626	78.2787	28.272	59.7	1.95e-09	5	191	123	28272	244	186	fabG	7	192	NP_001317148.1	5
3627	66.8033	27.607	57	4.29e-09	3	163	111	27607	244	166	fabG	4	160	BAB14526.1	5
3628	57.377	29.286	57.8	4.8e-09	2	140	73	29286	244	243	fabG	104	129	BAB14782.1	16
3629	72.541	24.294	58.5	5.31e-09	2	177	128	24294	244	190	fabG	20	281	EAW68080.1	105
3630	90.1639	29.091	58.5	6e-09	8	220	122	29091	244	192	fabG	4	258	NP_065956.1	42
3631	86.4754	27.014	58.2	6.37e-09	7	211	127	27014	244	190	fabG	1	239	AAH25724.1	35
3632	86.4754	27.014	58.2	6.37e-09	7	211	127	27014	244	190	fabG	1	239	NP_689656.2	35
3633	66.8033	27.607	56.2	7.93e-09	3	163	111	27607	244	166	fabG	4	160	BAF84024.1	5
3634	66.3934	25.926	56.2	8.36e-09	4	162	112	25926	244	227	fabG	73	165	BAB15390.1	5
3635	66.3934	25.926	56.2	9.05e-09	4	162	112	25926	244	227	fabG	73	165	BAG38090.1	5
3636	88.1148	26.977	57.4	1.08e-08	7	215	121	26977	244	190	fabG	1	240	EAW80949.1	37
3637	54.5082	28.571	57.4	1.3e-08	1	133	93	28571	244	186	fabG	54	222	ABF13478.1	92
3638	51.6393	26.19	55.1	1.89e-08	1	126	85	26190	244	120	fabG	3	141	BAG58934.1	16
3639	78.6885	28.125	56.2	2.54e-08	5	192	119	28125	244	181	fabG	5	197	XP_011517393.1	10
3640	78.6885	28.125	56.6	2.6e-08	5	192	119	28125	244	181	fabG	5	232	3KVO_A	45
3641	95.4918	27.468	56.2	2.71e-08	9	233	114	27468	244	188	fabG	7	235	NP_001748.1	7
3642	95.4918	27.468	56.2	2.82e-08	9	233	114	27468	244	188	fabG	7	234	1WMA_A	6
3643	23.3607	49.123	56.6	3.02e-08	0	57	29	49123	244	181	fabG	125	57	BAG58380.1	1
3644	95.4918	27.468	55.8	3.22e-08	9	233	114	27468	244	188	fabG	7	234	2PFG_A	6
3645	78.6885	28.125	56.2	3.32e-08	5	192	119	28125	244	181	fabG	5	197	BAF82618.1	10
3646	78.6885	28.125	56.2	3.51e-08	5	192	119	28125	244	181	fabG	5	197	NP_115679.2	10
3647	37.2951	26.374	54.7	3.83e-08	0	91	67	26374	244	195	fabG	105	122	XP_016870166.1	32
3648	77.8689	24.211	55.5	4.12e-08	3	190	101	24211	244	188	fabG	2	186	NP_001304979.1	37
3649	77.8689	24.211	55.5	4.39e-08	3	190	101	24211	244	188	fabG	2	186	XP_011515781.1	37
3650	66.8033	26.994	54.3	4.46e-08	3	163	112	26994	244	166	fabG	4	160	BAG54681.1	5
3651	60.6557	27.703	53.9	5.11e-08	2	148	95	27703	244	139	fabG	4	156	CAI42651.1	9
3652	49.5902	31.405	53.1	6.38e-08	4	121	72	31405	244	112	fabG	3	125	EAW66039.1	5
3653	86.8852	24.057	55.1	8.22e-08	6	212	128	24057	244	190	fabG	6	249	CAC82170.1	44
3654	61.4754	27.333	53.5	8.93e-08	2	150	97	27333	244	139	fabG	2	156	ALQ33566.1	7
3655	70.9016	24.855	54.7	9.35e-08	3	173	125	24855	244	188	fabG	21	226	BAD96313.1	54
3656	70.9016	24.855	54.7	9.53e-08	3	173	125	24855	244	188	fabG	21	226	NP_004744.2	54
3657	57.377	28.571	53.9	9.73e-08	3	140	93	28571	244	138	fabG	5	188	EAW68089.1	50
3658	70.9016	24.855	54.7	1.03e-07	3	173	125	24855	244	188	fabG	21	226	AAC63263.1	54
3659	86.8852	24.057	54.3	1.27e-07	6	212	128	24057	244	190	fabG	6	249	NP_660160.2	44
3660	46.3115	31.858	52.4	1.29e-07	4	113	66	31858	244	106	fabG	5	119	EAW66038.1	7
3661	86.8852	24.057	54.3	1.45e-07	6	212	128	24057	244	190	fabG	6	249	AAQ89208.1	44
3662	86.8852	24.057	54.3	1.58e-07	6	212	128	24057	244	190	fabG	6	249	AAH19696.2	44
3663	87.2951	24.413	54.3	1.76e-07	6	213	120	24413	244	182	fabG	2	324	BAF83989.1	121
3664	87.2951	23.944	53.9	1.88e-07	5	213	121	23944	244	182	fabG	2	211	NP_001278926.1	8
3665	41.3934	27.723	52.8	2.26e-07	1	101	72	27723	244	188	fabG	89	101	NP_001309210.1	1
3666	36.4754	38.202	51.6	2.71e-07	2	89	51	38202	244	89	fabG	5	93	XP_011528074.1	5
3667	53.2787	26.923	52.8	2.76e-07	2	130	89	26923	244	190	fabG	67	167	XP_011518458.1	38
3668	84.4262	25.243	53.5	2.93e-07	6	206	131	25243	244	188	fabG	2	234	NP_653284.2	33
3669	87.2951	24.413	53.5	3.02e-07	6	213	120	24413	244	182	fabG	2	324	BAG51361.1	121
3670	87.2951	24.413	53.5	3.1e-07	6	213	120	24413	244	182	fabG	2	324	NP_057457.1	121
3671	87.2951	23.944	53.1	3.45e-07	5	213	121	23944	244	182	fabG	2	211	BAG60575.1	8
3672	87.2951	24.413	53.1	3.67e-07	6	213	120	24413	244	182	fabG	2	324	QBB67479.1	121
3673	87.2951	24.413	53.1	3.98e-07	6	213	120	24413	244	182	fabG	2	324	AAF82054.1	121
3674	87.2951	24.413	53.1	4.32e-07	6	213	120	24413	244	182	fabG	2	324	EAW95578.1	121
3675	78.6885	22.917	52.4	4.33e-07	3	192	100	22917	244	190	fabG	5	185	EAX05987.1	36
3676	87.2951	24.413	52.8	4.42e-07	6	213	120	24413	244	182	fabG	2	324	AAF82053.1	121
3677	57.7869	24.113	52	5.25e-07	1	141	106	24113	244	188	fabG	49	141	NP_001306154.1	1
3678	77.8689	27.368	51.2	7e-07	5	190	122	27368	244	186	fabG	7	188	AAB17014.1	5
3679	87.2951	24.413	52.4	7.08e-07	6	213	120	24413	244	182	fabG	2	324	AAP94227.1	121
3680	68.0328	24.699	50.1	1.87e-06	5	166	100	24699	244	149	fabG	6	191	EAW85814.1	29
3681	36.0656	38.636	49.3	2.48e-06	2	88	50	38636	244	89	fabG	6	93	NP_001273718.1	6
3682	61.0656	28.859	48.5	3.02e-06	4	149	93	28859	244	145	fabG	7	150	BAG61942.1	5
3683	36.0656	38.636	48.9	3.27e-06	2	88	50	38636	244	89	fabG	6	93	EAX09752.1	6
3684	29.0984	32.394	48.1	4.18e-06	1	71	46	32394	244	199	fabG	131	80	NP_001243230.1	10
3685	75	25.137	49.7	4.26e-06	5	183	128	25137	244	178	fabG	2	205	NP_940935.1	26
3686	75	25.137	49.7	4.41e-06	5	183	128	25137	244	178	fabG	2	252	NP_001254797.1	73
3687	75	25.137	49.7	4.54e-06	5	183	128	25137	244	178	fabG	2	205	NP_941995.1	26
3688	22.9508	50	49.7	6.92e-06	1	56	26	50000	244	181	fabG	126	54	NP_001278957.1	1
3689	22.9508	50	49.7	6.98e-06	1	56	26	50000	244	181	fabG	126	54	BAG52804.1	1
3690	63.5246	27.097	48.5	7.14e-06	5	155	81	27097	244	138	fabG	1	175	EAX08889.1	36
3691	61.8852	27.815	48.5	7.55e-06	5	151	77	27815	244	138	fabG	5	175	EAX08885.1	40
3692	38.5246	36.17	48.1	1.02e-05	3	94	55	36170	244	89	fabG	1	128	ALQ34324.1	35
3693	78.2787	27.225	48.1	1.06e-05	6	191	122	27225	244	186	fabG	7	189	EAW60835.1	5
3694	58.6066	28.671	48.5	1.22e-05	6	143	86	28671	244	138	fabG	5	170	AAH26024.1	35
3695	41.3934	32.673	48.1	1.29e-05	2	101	63	32673	244	97	fabG	2	133	EAW51150.1	33
3696	58.6066	28.671	48.5	1.3e-05	6	143	86	28671	244	138	fabG	5	175	NP_001257353.1	40
3697	60.2459	28.571	46.6	1.6e-05	4	147	92	28571	244	143	fabG	7	148	BAG62173.1	5
3698	100	26.23	47.8	1.98e-05	10	244	153	26230	244	226	fabG	7	263	4XWY_A	23
3699	100	26.23	47.8	1.99e-05	10	244	153	26230	244	226	fabG	7	268	1Z6Z_A	28
3700	100	26.23	47.8	2e-05	10	244	153	26230	244	226	fabG	7	264	6I6C_A	24
3701	38.9344	35.789	46.6	2.08e-05	4	95	54	35789	244	89	fabG	1	130	ABD90542.1	37
3702	100	26.23	47.4	2.2e-05	10	244	153	26230	244	226	fabG	7	249	NP_003115.1	9
3703	100	26.23	47.4	2.25e-05	10	244	153	26230	244	226	fabG	7	276	4HWK_A	36
3704	76.6393	27.273	47	2.72e-05	4	187	108	27273	244	169	fabG	5	218	BAF84268.1	38
3705	38.9344	35.789	47	2.93e-05	4	95	54	35789	244	89	fabG	1	130	ALQ34086.1	37
3706	38.9344	35.789	47	3e-05	4	95	54	35789	244	89	fabG	1	130	NP_001239579.1	37
3707	76.6393	27.273	46.6	3.47e-05	4	187	108	27273	244	169	fabG	5	218	BAG53715.1	38
3708	79.0984	28.497	46.6	3.8e-05	6	193	106	28497	244	173	fabG	5	222	XP_024307105.1	38
3709	13.1148	65.625	43.5	4.35e-05	0	32	11	65625	244	32	fabG	1	32	AAF29493.1	1
3710	61.0656	28.859	46.6	4.53e-05	4	149	80	28859	244	190	fabG	62	168	NP_612421.1	26
3711	61.0656	28.859	46.6	4.7e-05	4	149	80	28859	244	190	fabG	62	168	BAG37918.1	26
3712	96.7213	25	45.8	5.07e-05	8	236	102	25000	244	240	fabG	6	194	NP_001269919.1	33
3713	100	26.23	46.2	5.84e-05	10	244	153	26230	244	226	fabG	7	249	BAD96662.1	9
3714	13.1148	65.625	44.7	0.00012	0	32	11	65625	244	32	fabG	1	32	NP_001243235.1	1
3715	25	31.148	42	0.000886	1	61	40	31148	244	199	fabG	141	133	NP_001243235.1	73
3716	13.1148	65.625	44.7	0.000121	0	32	11	65625	244	32	fabG	1	32	BAG61916.1	1
3717	25	31.148	42	0.000886	1	61	40	31148	244	199	fabG	141	133	BAG61916.1	73
3718	97.9508	22.176	45.1	0.00018	7	239	126	22176	244	190	fabG	6	276	AQN67629.1	44
3719	32.7869	35	45.4	0.000193	2	80	47	35000	244	90	fabG	16	692	EAW99683.1	613
3720	13.5246	54.545	40.8	0.000545	0	33	15	54545	244	240	fabG	208	86	AAT70758.1	54
3721	41.8033	23.529	40.8	0.000599	2	102	72	23529	244	156	fabG	58	99	EAW85816.1	1
3722	86.8852	24.057	43.1	0.000713	6	212	119	24057	244	190	fabG	1	228	EAW80950.1	37
3723	25.8197	34.921	39.7	0.001	1	63	40	34921	244	188	fabG	126	62	EAW96969.1	1
3724	43.4426	32.075	41.2	0.001	3	106	68	32075	244	107	fabG	6	138	XP_011534668.1	33
3725	53.2787	27.692	40.8	0.001	5	130	84	27692	244	138	fabG	16	130	AAK91586.1	4
3726	35.6557	25.287	40.4	0.001	0	87	65	25287	244	88	fabG	2	112	AGL08019.1	26
3727	27.459	32.836	41.2	0.001	1	67	44	32836	244	188	fabG	122	66	AAF82747.1	1
3728	65.5738	27.5	42	0.001	6	160	96	27500	244	192	fabG	50	172	EAX00858.1	16
3729	13.5246	54.545	38.9	0.001	0	33	15	54545	244	240	fabG	208	52	AAX49568.1	20
3730	86.8852	24.057	42	0.002	6	212	119	24057	244	190	fabG	1	228	AAH51291.1	37
3731	32.7869	28.75	40.8	0.002	0	80	57	28750	244	190	fabG	111	83	EAW68084.1	4
3732	13.5246	54.545	40.8	0.002	0	33	15	54545	244	240	fabG	208	155	ABC61321.1	123
3733	34.4262	27.381	40.8	0.002	1	84	56	27381	244	190	fabG	107	154	NP_001180564.1	76
3734	13.5246	54.545	40.8	0.002	0	33	15	54545	244	240	fabG	208	159	AGJ72857.1	127
3735	13.5246	54.545	40.4	0.002	0	33	15	54545	244	240	fabG	208	153	NP_001269920.1	121
3736	18.8525	43.478	31.6	2.2	1	46	25	43478	244	50	fabG	6	78	NP_001269920.1	33
3737	13.5246	54.545	40.4	0.003	0	33	15	54545	244	240	fabG	208	169	AAL61824.2	137
3738	43.0328	31.429	38.5	0.013	3	105	68	31429	244	106	fabG	6	119	AAL61824.2	15
3739	13.5246	54.545	40.4	0.003	0	33	15	54545	244	240	fabG	208	187	NP_001269918.1	155
3740	43.0328	31.429	38.5	0.014	3	105	68	31429	244	106	fabG	6	137	NP_001269918.1	33
3741	35.6557	34.483	39.3	0.005	2	87	54	34483	244	89	fabG	6	123	NP_001305764.1	37
3742	31.9672	25.641	39.7	0.005	0	78	58	25641	244	79	fabG	2	103	AGL08020.1	26
3743	38.9344	30.526	39.7	0.008	2	95	58	30526	244	89	fabG	3	124	BAG60032.1	30
3744	35.6557	34.483	38.9	0.008	2	87	54	34483	244	89	fabG	6	140	BAD92890.1	54
3745	81.1475	22.222	39.7	0.009	7	198	113	22222	244	231	fabG	56	210	EAW98690.1	32
3746	13.5246	51.515	37.4	0.01	0	33	16	51515	244	33	fabG	1	37	ALQ33596.1	5
3747	68.8525	26.786	38.9	0.01	7	168	104	26786	244	156	fabG	7	175	BAA34534.1	9
3748	76.6393	25.668	39.7	0.012	6	187	118	25668	244	192	fabG	22	341	EAX00857.1	160
3749	42.2131	32.039	38.1	0.017	3	103	66	32039	244	104	fabG	6	135	NP_001269916.1	33
3750	14.3443	51.429	38.9	0.018	0	35	17	51429	244	159	fabG	125	35	EAW92030.1	1
3751	13.5246	51.515	37	0.02	0	33	16	51515	244	33	fabG	1	37	ALQ33595.1	5
3752	43.0328	29.524	37.4	0.025	2	105	70	29524	244	106	fabG	6	137	BAH13431.1	33
3753	51.6393	26.984	37.7	0.029	4	126	76	26984	244	192	fabG	80	156	EAX00856.1	34
3754	38.9344	33.684	37.4	0.034	3	95	56	33684	244	95	fabG	5	139	ALQ33591.1	48
3755	38.9344	33.684	37	0.039	3	95	56	33684	244	95	fabG	5	139	ALQ33589.1	48
3756	35.2459	30.233	37.4	0.04	3	86	45	30233	244	231	fabG	148	151	CAB70685.1	79
3757	53.2787	26.923	38.1	0.043	4	130	79	26923	244	192	fabG	76	572	NP_001186032.1	446
3758	48.7705	24.37	37	0.054	3	119	85	24370	244	178	fabG	62	118	NP_941996.1	3
3759	13.9344	52.941	36.6	0.065	0	34	16	52941	244	36	fabG	3	42	XP_011523535.1	9
3760	29.5082	27.778	36.6	0.068	1	72	39	27778	244	190	fabG	132	112	XP_024307107.1	41
3761	34.4262	27.381	36.2	0.17	1	84	59	27381	244	158	fabG	75	583	5C37_A	502
3762	93.8525	21.834	35.8	0.17	7	229	134	21834	244	189	fabG	6	231	AAP97275.1	3
3763	37.2951	28.571	34.3	0.18	3	91	58	28571	244	89	fabG	6	93	NP_001291442.1	3
3764	34.4262	27.381	36.2	0.18	1	84	59	27381	244	158	fabG	75	581	6NNA_A	500
3765	34.4262	27.381	36.2	0.18	1	84	59	27381	244	158	fabG	75	581	4PIV_A	500
3766	39.7541	30.928	35.4	0.21	4	97	54	30928	244	96	fabG	5	239	BAD92951.1	151
3767	39.7541	30.928	35.4	0.23	4	97	54	30928	244	96	fabG	5	237	BAD96870.1	149
3768	17.2131	40.476	33.9	0.24	0	42	25	40476	244	46	fabG	5	91	EAW68086.1	50
3769	37.2951	34.066	35.4	0.24	3	91	44	34066	244	82	fabG	5	97	BAF85175.1	10
3770	17.623	39.535	33.5	0.25	0	43	26	39535	244	47	fabG	5	92	AAH12536.1	50
3771	58.1967	20.423	35	0.25	2	142	91	20423	244	188	fabG	69	172	EAW86784.1	31
3772	37.2951	28.571	34.3	0.25	3	91	58	28571	244	89	fabG	6	93	NP_001291441.1	3
3773	37.2951	34.066	35.4	0.27	3	91	44	34066	244	82	fabG	5	97	NP_001182751.1	10
3774	39.7541	29.897	34.7	0.28	4	97	55	29897	244	96	fabG	5	100	NP_001128231.1	12
3775	13.1148	50	34.3	0.33	0	32	16	50000	244	33	fabG	2	152	NP_570607.1	121
3776	39.7541	29.897	35	0.33	4	97	55	29897	244	96	fabG	5	259	1YB5_A	171
3777	35.6557	34.483	35	0.34	3	87	41	34483	244	78	fabG	5	93	EAW59104.1	10
3778	45.082	25.455	35.4	0.34	2	110	78	25455	244	158	fabG	51	2039	AAA73576.1	1932
3779	39.7541	29.897	35	0.34	4	97	55	29897	244	96	fabG	5	237	NP_001880.2	149
3780	39.7541	29.897	35	0.35	4	97	55	29897	244	96	fabG	5	237	AAH70058.1	149
3781	37.2951	28.571	34.7	0.35	3	91	58	28571	244	89	fabG	6	93	EAW90718.1	3
3782	13.1148	50	34.3	0.44	0	32	16	50000	244	33	fabG	2	152	QBB67483.1	121
3783	13.1148	50	34.3	0.49	0	32	16	50000	244	33	fabG	2	152	AAK81727.1	121
3784	93.8525	21.834	34.3	0.51	7	229	134	21834	244	189	fabG	6	231	NP_057455.1	3
3785	75	22.404	34.3	0.54	6	183	119	22404	244	188	fabG	25	184	AAH15582.1	6
3786	34.4262	27.381	34.7	0.54	1	84	59	27381	244	158	fabG	75	2035	AAC50259.1	1954
3787	29.918	24.658	33.9	0.56	1	73	54	24658	244	178	fabG	106	124	NP_001254800.1	53
3788	34.4262	27.381	34.7	0.57	1	84	59	27381	244	158	fabG	75	2041	AAH63242.1	1960
3789	34.4262	27.381	34.7	0.57	1	84	59	27381	244	158	fabG	75	2041	EAW89745.1	1960
3790	34.4262	27.381	34.7	0.57	1	84	59	27381	244	158	fabG	75	2041	NP_004095.4	1960
3791	29.5082	27.778	33.9	0.58	2	72	38	27778	244	190	fabG	132	111	EAW80948.1	41
3792	34.4262	27.381	34.7	0.59	1	84	59	27381	244	158	fabG	75	2041	AAS09886.1	1960
3793	93.8525	21.834	33.9	0.65	7	229	134	21834	244	189	fabG	6	231	AAF14537.1	3
3794	29.918	24.658	33.1	0.86	1	73	54	24658	244	178	fabG	106	124	NP_941994.1	53
3795	34.4262	27.381	33.9	0.9	1	84	59	27381	244	158	fabG	75	460	AAH07267.1	379
3796	38.1148	29.032	32	1	3	93	57	29032	244	89	fabG	6	95	EAW90724.1	3
3797	48.7705	24.37	33.5	1.1	2	119	87	24370	244	181	fabG	65	120	CAH56256.1	3
3798	29.918	24.658	32.3	1.4	1	73	54	24658	244	178	fabG	106	100	AAH93950.1	29
3799	37.2951	25.275	31.6	1.6	1	91	61	25275	244	89	fabG	6	93	EAW85883.1	3
3800	37.2951	28.571	32.7	1.6	3	91	58	28571	244	89	fabG	6	93	CAC88111.1	3
3801	29.5082	25	32.3	1.7	1	72	53	25000	244	178	fabG	107	71	NP_941993.1	1
3802	29.5082	25	31.6	2	1	72	53	25000	244	178	fabG	107	71	NP_941997.1	1
3803	20.082	38.776	31.6	2.4	1	49	29	38776	244	50	fabG	3	78	BAG62915.1	30
3804	37.2951	25.275	32	2.6	1	91	61	25275	244	89	fabG	6	93	AAF86647.1	3
3805	32.377	29.114	32	2.7	1	79	49	29114	244	78	fabG	7	130	NP_001309211.1	52
3806	45.4918	23.423	31.6	2.8	1	111	81	23423	244	108	fabG	2	166	AAC62233.1	56
3807	37.2951	25.275	32	3.1	1	91	61	25275	244	89	fabG	6	93	EAW85882.1	3
3808	16.8033	41.463	32	3.1	0	41	24	41463	244	45	fabG	5	189	NP_001123515.1	149
3809	35.6557	33.333	31.6	3.8	3	87	48	33333	244	88	fabG	2	278	AAK64603.1	202
3810	13.1148	43.75	30.8	4.9	0	32	18	43750	244	182	fabG	151	152	AAF78197.1	121
3811	39.7541	29.897	29.6	8.4	4	97	54	29897	244	90	fabG	7	104	BAG61612.1	9
3825	80.916	27.358	57.8	3.92e-09	9	212	124	27358	262	238	fabI	42	198	EAW91662.1	2
3826	77.0992	27.228	54.7	6.86e-08	9	202	116	27228	262	194	fabI	3	184	EAW89732.1	4
3827	37.0229	30.928	52.4	4.41e-07	2	97	56	30928	262	250	fabI	160	222	AAH11968.1	131
3828	97.3282	24.706	52.8	4.73e-07	7	255	173	24706	262	250	fabI	4	255	BAB18775.1	12
3829	97.3282	24.706	52.4	4.9e-07	7	255	173	24706	262	250	fabI	4	256	3O4R_A	13
3830	97.3282	24.706	52.4	5.5e-07	7	255	173	24706	262	250	fabI	4	255	AAD02292.1	12
3831	97.3282	24.706	52.4	5.79e-07	7	255	173	24706	262	250	fabI	4	273	NP_066284.2	30
3832	37.0229	30.928	52.4	6.84e-07	2	97	56	30928	262	250	fabI	160	270	NP_065715.1	179
3833	37.0229	30.928	52	7.69e-07	2	97	56	30928	262	250	fabI	160	269	4FC6_A	178
3834	97.3282	24.706	51.6	1.23e-06	7	255	173	24706	262	250	fabI	4	273	AAQ13444.1	30
3835	93.1298	23.77	50.8	2.21e-06	6	244	169	23770	262	250	fabI	15	273	BAA91953.1	39
3836	97.3282	24.314	48.1	1.51e-05	7	255	174	24314	262	250	fabI	4	273	EAW66124.1	30
3837	97.7099	22.656	47	4.05e-05	7	256	180	22656	262	250	fabI	4	276	P0CG22.1	30
3838	43.1298	26.549	46.6	4.19e-05	0	113	83	26549	262	250	fabI	138	211	ADD92526.1	99
3839	99.2366	24.231	46.6	4.75e-05	8	260	175	24231	262	253	fabI	1	245	BAF82849.1	1
3840	79.0076	24.155	46.6	5.75e-05	7	207	132	24155	262	235	fabI	41	236	6HNO_A	43
3841	79.0076	24.155	45.8	8.31e-05	7	207	132	24155	262	235	fabI	41	236	6FFB_A	43
3842	45.8015	27.5	45.4	0.000106	2	120	73	27500	262	250	fabI	138	239	NP_001269917.1	127
3843	51.5267	25.926	45.1	0.000128	1	135	98	25926	262	250	fabI	118	239	XP_006720309.1	105
3844	101.908	23.596	45.1	0.000153	9	267	168	23596	262	253	fabI	1	245	AAQ89200.1	1
3845	79.0076	23.671	44.7	0.000202	7	207	133	23671	262	235	fabI	41	236	5HS6_A	43
3846	79.0076	23.671	44.7	0.000231	7	207	133	23671	262	235	fabI	41	234	NP_057330.2	41
3847	98.855	22.78	44.7	0.000239	6	259	174	22780	262	249	fabI	2	275	NP_005785.1	32
3848	101.908	23.596	44.3	0.000247	9	267	168	23596	262	253	fabI	1	245	AAH01953.1	1
3849	98.855	22.78	44.7	0.000254	6	259	174	22780	262	249	fabI	2	266	AAH07339.2	23
3850	75.9542	23.618	44.3	0.000291	6	199	132	23618	262	235	fabI	41	223	EAW52404.1	41
3851	79.0076	23.671	44.3	0.000301	7	207	133	23671	262	235	fabI	41	234	6GBT_A	41
3852	79.0076	23.671	44.3	0.000303	7	207	133	23671	262	235	fabI	41	236	5ICS_A	43
3853	102.672	21.19	44.3	0.000337	8	269	180	21190	262	253	fabI	2	267	CAB89810.1	14
3854	79.0076	23.671	43.9	0.000346	7	207	133	23671	262	235	fabI	41	234	6G4L_A	41
3855	79.0076	23.671	43.9	0.000362	7	207	133	23671	262	235	fabI	41	234	1YDE_A	41
3856	79.0076	23.671	43.9	0.000404	7	207	133	23671	262	235	fabI	41	234	6H0M_A	41
3857	101.908	23.596	43.5	0.000488	9	267	168	23596	262	253	fabI	1	245	NP_064524.3	1
3858	101.908	23.596	43.1	0.000573	9	267	168	23596	262	253	fabI	1	245	2AG5_A	1
3859	102.672	20.818	43.1	0.000772	8	269	181	20818	262	253	fabI	2	267	NP_060911.2	14
3860	98.855	22.78	42.7	0.001	6	259	174	22780	262	249	fabI	2	275	BAD96577.1	32
3861	102.672	20.818	42.7	0.001	8	269	181	20818	262	253	fabI	2	286	AAK14920.1	33
3862	101.908	23.221	42	0.001	9	267	169	23221	262	253	fabI	1	245	AAH95414.1	1
3863	104.962	23.636	41.6	0.002	10	275	172	23636	262	253	fabI	1	259	XP_006714337.1	1
3864	50	28.244	40	0.003	4	131	77	28244	262	250	fabI	130	145	NP_001264793.1	22
3865	102.672	19.703	41.2	0.003	7	269	186	19703	262	253	fabI	2	288	EAW70557.1	33
3866	46.9466	26.016	40	0.006	2	123	77	26016	262	249	fabI	134	199	XP_011534640.1	84
3867	79.0076	24.155	38.5	0.026	6	207	138	24155	262	254	fabI	56	258	2PD6_A	63
3868	77.8626	24.02	37.4	0.05	6	204	136	24020	262	251	fabI	56	259	NP_055049.1	67
3869	77.8626	24.02	37.4	0.052	6	204	136	24020	262	251	fabI	56	259	AQY76863.2	67
3870	77.8626	23.529	35.8	0.17	6	204	137	23529	262	251	fabI	56	259	4CQM_D	67
3871	80.916	23.585	35.4	0.29	6	212	139	23585	262	207	fabI	2	226	NP_878912.1	32
3872	87.4046	22.707	33.9	0.65	8	229	150	22707	262	220	fabI	3	216	2GDZ_A	4
3873	37.4046	25.51	33.5	0.67	2	98	67	25510	262	253	fabI	160	130	XP_024308766.1	35
3874	13.3588	45.714	31.2	0.71	0	35	19	45714	262	250	fabI	216	52	AAX49568.1	18
3875	37.4046	25.51	33.1	0.73	2	98	67	25510	262	253	fabI	160	121	XP_024308767.1	26
3876	97.3282	24.314	33.5	0.82	10	255	144	24314	262	253	fabI	1	208	EAX06168.1	1
3877	87.0229	22.807	33.9	0.84	8	228	149	22807	262	220	fabI	4	214	AAA89174.1	3
3878	87.0229	22.807	33.9	0.85	8	228	149	22807	262	220	fabI	4	214	NP_000851.2	3
3879	33.9695	24.719	32.3	1.2	1	89	65	24719	262	194	fabI	108	116	ADD92527.1	28
3880	37.4046	24.49	31.6	2.7	2	98	68	24490	262	253	fabI	160	121	CAG33426.1	26
3881	13.3588	45.714	30.4	3.1	0	35	19	45714	262	250	fabI	216	86	AAT70758.1	52
3882	41.9847	26.364	30.4	4.5	3	110	63	26364	262	253	fabI	155	119	EAX06165.1	17
3883	23.6641	35.484	32	4.6	2	62	34	35484	262	252	fabI	195	103	XP_016879978.1	44
3884	23.6641	35.484	32	4.7	2	62	34	35484	262	252	fabI	195	103	XP_011522931.1	44
3885	23.6641	35.484	32	4.7	2	62	34	35484	262	252	fabI	195	103	NP_001180394.1	44
3886	23.6641	35.484	32	4.7	2	62	34	35484	262	252	fabI	195	103	BAF83948.1	44
3887	23.6641	35.484	32	4.7	2	62	34	35484	262	252	fabI	195	103	NP_056258.1	44
3888	23.6641	35.484	32	4.7	2	62	34	35484	262	252	fabI	195	103	BAA86581.1	44
3889	23.6641	35.484	32	4.7	2	62	34	35484	262	252	fabI	195	103	Q7Z3B3.2	44
3890	23.6641	35.484	32	5	2	62	34	35484	262	252	fabI	195	103	XP_011522932.1	44
3891	23.6641	35.484	32	5.1	2	62	34	35484	262	252	fabI	195	103	XP_011522933.1	44
3892	37.0229	28.866	30.4	5.7	4	97	56	28866	262	93	fabI	4	93	NP_001243234.1	3
3893	37.0229	28.866	30.8	6	4	97	56	28866	262	93	fabI	4	93	CAA57843.1	3
3894	37.0229	28.866	30.8	6.5	4	97	56	28866	262	93	fabI	4	93	NP_001139288.1	3
3895	43.5115	25.439	30.4	6.6	3	114	67	25439	262	253	fabI	151	144	BAG62318.1	38
3896	37.0229	28.866	30.4	6.9	4	97	56	28866	262	93	fabI	4	93	NP_001350503.1	3
3897	13.3588	45.714	30.4	7	0	35	19	45714	262	250	fabI	216	159	AGJ72857.1	125
3898	13.3588	45.714	30	8.6	0	35	19	45714	262	250	fabI	216	155	ABC61321.1	121
3899	13.3588	45.714	30	9.8	0	35	19	45714	262	250	fabI	216	194	NP_001269919.1	160
3900	13.3588	45.714	30	10	0	35	19	45714	262	250	fabI	216	153	NP_001269920.1	119
3901	26.4901	45	30.8	1.5	2	40	19	45000	151	78	fabZ	39	60	ANH09864.1	24
3902	44.3709	38.806	29.6	4.4	4	67	25	38806	151	92	fabZ	39	89	ABC67089.1	26
3903	44.3709	38.806	29.3	6	4	67	25	38806	151	92	fabZ	39	89	ABC67088.1	26
3904	21.8543	45.455	29.6	7.9	2	33	12	45455	151	136	fabZ	104	1455	CAA04666.1	1429
3905	21.8543	45.455	29.6	8.2	2	33	12	45455	151	136	fabZ	104	535	XP_016855490.1	509
3906	21.8543	45.455	29.6	8.4	2	33	12	45455	151	136	fabZ	104	1455	EAX06594.1	1429
3907	21.8543	45.455	29.6	8.4	2	33	12	45455	151	136	fabZ	104	1455	NP_795352.3	1429
3908	21.8543	45.455	29.6	8.4	2	33	12	45455	151	136	fabZ	104	1455	AAM28433.1	1429
3909	21.8543	45.455	29.6	8.5	2	33	12	45455	151	136	fabZ	104	1480	XP_011538769.1	1454
3910	21.8543	45.455	29.6	8.5	2	33	12	45455	151	136	fabZ	104	1455	XP_024304382.1	1429
3911	21.8543	45.455	29.6	8.5	2	33	12	45455	151	136	fabZ	104	1480	XP_011538766.1	1454
3912	21.8543	45.455	29.6	8.6	2	33	12	45455	151	136	fabZ	104	1480	XP_024304410.1	1454
3913	21.8543	45.455	29.6	8.8	2	33	12	45455	151	136	fabZ	104	1455	XP_016855488.1	1429
3914	21.8543	45.455	29.6	8.8	2	33	12	45455	151	136	fabZ	104	1480	XP_016855487.1	1454
3915	21.8543	45.455	29.6	8.8	2	33	12	45455	151	136	fabZ	104	1455	NP_001337074.2	1429
3916	21.8543	45.455	28.5	8.8	2	33	12	45455	151	136	fabZ	104	38	2DM8_A	12
3917	21.8543	45.455	29.6	8.8	2	33	12	45455	151	136	fabZ	104	1480	XP_011538768.1	1454
3918	21.8543	45.455	29.6	8.8	2	33	12	45455	151	136	fabZ	104	1455	XP_011538767.1	1429
3919	21.8543	45.455	29.6	8.8	2	33	12	45455	151	136	fabZ	104	1480	XP_011538764.1	1454
3920	21.8543	45.455	29.6	8.9	2	33	12	45455	151	136	fabZ	104	914	BAB19683.1	888
3921	21.8543	45.455	29.6	9	2	33	12	45455	151	136	fabZ	104	1480	XP_011538770.1	1454
3922	21.8543	45.455	29.6	9	2	33	12	45455	151	136	fabZ	104	1455	CAA12112.1	1429
3923	21.8543	45.455	29.6	9	2	33	12	45455	151	136	fabZ	104	1455	EAX06595.1	1429
3924	21.8543	45.455	29.6	9	2	33	12	45455	151	136	fabZ	104	1455	EAX06596.1	1429
3925	21.8543	45.455	29.6	9	2	33	12	45455	151	136	fabZ	104	1455	CAA12113.1	1429
3926	21.8543	45.455	29.6	9	2	33	12	45455	151	136	fabZ	104	1177	XP_016855489.1	1151
3927	21.8543	45.455	29.6	9.1	2	33	12	45455	151	136	fabZ	104	1455	EAX06593.1	1429
3928	23.8411	33.333	28.9	9.9	0	36	24	33333	151	46	fabZ	11	84	EAW48236.1	49
3929	52.3677	24.468	33.9	1.4	7	188	116	24468	359	210	fbaA	36	265	EAX09998.1	91
3930	21.4485	31.169	33.1	2.4	3	77	48	31169	359	227	fbaA	156	287	XP_016875028.1	211
3931	21.4485	31.169	32.7	2.7	3	77	48	31169	359	227	fbaA	156	201	AAH98313.1	125
3932	21.4485	31.169	33.1	2.8	3	77	48	31169	359	227	fbaA	156	365	XP_016875026.1	289
3933	21.4485	31.169	33.1	2.9	3	77	48	31169	359	227	fbaA	156	284	XP_016875029.1	208
3934	21.4485	31.169	33.1	2.9	3	77	48	31169	359	227	fbaA	156	563	NP_001306917.1	487
3935	21.4485	31.169	32.7	2.9	3	77	48	31169	359	227	fbaA	156	269	XP_011536817.1	193
3936	21.4485	31.169	33.1	3.2	3	77	48	31169	359	227	fbaA	156	486	NP_060385.3	410
3937	21.4485	31.169	33.1	3.2	3	77	48	31169	359	227	fbaA	156	408	XP_011536811.1	332
3938	21.4485	31.169	32.7	3.5	3	77	48	31169	359	227	fbaA	156	429	XP_016875023.1	353
3939	21.4485	31.169	32.7	3.5	3	77	48	31169	359	227	fbaA	156	405	NP_001306923.1	329
3940	21.4485	31.169	32.7	3.6	3	77	48	31169	359	227	fbaA	156	405	BAA91306.1	329
3941	23.9554	27.907	32.7	3.7	3	86	57	27907	359	249	fbaA	166	387	XP_011518015.1	305
3942	23.9554	27.907	32.7	3.8	3	86	57	27907	359	249	fbaA	166	387	XP_011518016.1	305
3943	21.4485	31.169	32.3	4.1	3	77	48	31169	359	227	fbaA	156	405	AAH30962.1	329
3944	12.2563	38.636	32.3	5.1	1	44	24	38636	359	299	fbaA	256	1316	EAX07401.1	1276
3945	12.2563	38.636	32.3	5.2	1	44	23	38636	359	299	fbaA	256	1316	XP_011540242.1	1277
3946	12.2563	38.636	32.3	5.2	1	44	24	38636	359	299	fbaA	256	1317	AAG24515.1	1277
3947	12.2563	38.636	32.3	5.2	1	44	24	38636	359	299	fbaA	256	1317	NP_001317419.1	1277
3958	65.7658	39.726	51.6	4.9e-09	3	73	40	39726	111	110	fdx	41	72	AAA35855.1	1
3959	42.3423	44.681	41.2	0.000139	1	47	25	44681	111	69	fdx	24	136	BAC04929.1	90
3975	32.4503	29.932	48.1	5.43e-05	5	147	77	29932	453	448	ffh	326	305	EAW65895.1	161
3978	32.4503	29.932	49.7	1.56e-05	5	147	77	29932	453	448	ffh	326	305	EAW65894.1	161
3979	24.2826	30	44.7	7.87e-05	3	110	67	30000	453	430	ffh	329	109	1QB2_A	2
3980	24.2826	30	44.7	0.000138	3	110	67	30000	453	430	ffh	329	122	1MFQ_C	15
3981	33.3333	27.152	34.7	0.84	7	151	78	27152	453	228	ffh	88	159	XP_011516266.1	31
3982	33.3333	27.152	33.5	1.8	7	151	78	27152	453	228	ffh	88	159	XP_005251574.1	31
3983	33.3333	27.152	33.5	1.8	7	151	78	27152	453	228	ffh	88	159	XP_016870414.1	31
3984	10.596	41.667	32	2.3	2	48	24	41667	453	135	ffh	88	74	AAP73813.1	31
3985	10.596	41.667	32	2.6	2	48	24	41667	453	135	ffh	88	74	NP_001273765.1	31
3986	33.3333	27.815	32.7	2.7	7	151	77	27815	453	228	ffh	88	159	AAH67803.1	31
3987	34.2163	26.452	33.1	3.3	7	155	82	26452	453	228	ffh	84	159	XP_005251572.1	27
3988	33.3333	27.152	33.1	3.3	7	151	78	27152	453	228	ffh	88	159	XP_011516264.1	31
3989	10.596	41.667	31.2	3.4	2	48	24	41667	453	135	ffh	88	66	AAG44700.1	23
3990	33.3333	27.815	32.7	3.4	7	151	77	27815	453	228	ffh	88	159	XP_016869947.1	31
3991	34.2163	26.452	33.1	3.6	7	155	82	26452	453	228	ffh	84	159	XP_005251571.1	27
3992	33.3333	27.152	32.3	3.8	7	151	78	27152	453	228	ffh	88	159	BAF85274.1	31
3993	33.3333	27.815	32.7	4.1	7	151	77	27815	453	228	ffh	88	159	XP_016869944.1	31
3994	34.2163	26.452	32.7	4.4	7	155	82	26452	453	228	ffh	84	159	NP_001138828.1	27
3995	34.2163	26.452	32.7	4.6	7	155	82	26452	453	228	ffh	84	159	AAK14935.1	27
3996	34.2163	26.452	32.7	5	7	155	82	26452	453	228	ffh	84	159	NP_060961.3	27
3997	34.2163	26.452	32.7	5.1	7	155	82	26452	453	228	ffh	84	159	AAQ76869.1	27
3998	10.596	41.667	31.6	6.1	2	48	24	41667	453	135	ffh	88	74	BAG56717.1	31
3999	33.3333	27.815	32.3	6.2	7	151	77	27815	453	228	ffh	88	159	XP_006716977.1	31
4000	34.2163	27.097	32.3	6.5	7	155	81	27097	453	228	ffh	84	159	XP_016870525.1	27
4001	34.2163	26.452	32	6.5	7	155	74	26452	453	228	ffh	88	159	XP_011508969.1	31
4002	34.2163	27.097	32.3	6.7	7	155	81	27097	453	228	ffh	84	159	XP_005272808.1	27
4003	34.2163	27.097	32.3	6.7	7	155	81	27097	453	228	ffh	84	159	NP_001020087.2	27
4004	35.0993	25.786	32	7.1	7	159	78	25786	453	228	ffh	84	159	NP_001317266.1	27
4005	34.2163	27.742	32	7.1	7	155	72	27742	453	228	ffh	88	159	XP_006717179.1	31
4006	34.2163	27.097	32	7.2	7	155	81	27097	453	228	ffh	84	159	XP_024303421.1	27
4007	35.0993	25.786	32	7.6	7	159	78	25786	453	228	ffh	84	159	XP_005263661.1	27
4008	34.2163	27.097	32	7.7	7	155	81	27097	453	228	ffh	84	159	XP_005277696.1	27
4009	34.2163	27.097	32	7.7	7	155	81	27097	453	228	ffh	84	159	XP_005277697.1	27
4010	10.596	41.667	31.6	8.3	2	48	24	41667	453	135	ffh	88	74	XP_016870521.1	31
4011	34.2163	27.097	32	8.4	7	155	81	27097	453	228	ffh	84	159	NP_001317597.1	27
4012	34.2163	27.097	32	9	7	155	81	27097	453	228	ffh	84	159	XP_016870524.1	27
4013	34.2163	27.097	32	9	7	155	81	27097	453	228	ffh	84	159	NP_001350680.1	27
4014	35.0993	25.786	32	9.2	7	159	78	25786	453	228	ffh	84	159	AAF68990.2	27
4015	16.1148	32.877	31.6	9.3	3	73	43	32877	453	160	ffh	88	97	XP_016870516.1	31
4016	35.0993	25.786	31.6	9.4	7	159	78	25786	453	228	ffh	84	159	AAI20992.1	27
4017	35.0993	25.786	31.6	9.6	7	159	78	25786	453	228	ffh	84	159	NP_742000.1	27
4018	35.0993	27.044	31.6	9.7	7	159	76	27044	453	228	ffh	84	159	NP_958861.2	27
4019	34.2163	27.097	31.6	9.8	7	155	81	27097	453	228	ffh	84	159	XP_005277694.1	27
4020	35.0993	25.786	31.6	9.8	7	159	78	25786	453	228	ffh	84	159	NP_001317265.1	27
4021	34.2163	27.097	31.6	9.8	7	155	81	27097	453	228	ffh	84	159	NP_001078926.1	27
4022	11.479	38.462	31.6	10	2	52	28	38462	453	135	ffh	84	74	AAQ76870.1	27
4028	84.6591	27.517	33.9	0.42	9	149	70	27517	176	137	fldA	6	249	EAW71778.1	122
4029	88.6364	25	32.7	0.88	6	156	86	25000	176	132	fldA	6	159	EAX08092.1	6
4030	88.6364	25	33.1	0.91	6	156	86	25000	176	132	fldA	6	186	AAI09217.1	33
4031	88.6364	25	33.1	0.91	6	156	86	25000	176	132	fldA	6	186	EAX08093.1	33
4032	88.6364	25	32.7	1	6	156	86	25000	176	132	fldA	6	174	XP_024301831.1	21
4033	88.6364	25	32.7	1.1	6	156	86	25000	176	132	fldA	6	159	EAX08091.1	6
4034	22.7273	47.5	31.6	1.1	2	40	19	47500	176	118	fldA	80	109	CAL59668.1	71
4035	88.6364	25	32.7	1.1	6	156	86	25000	176	132	fldA	6	159	NP_002445.2	6
4036	88.6364	24.359	31.6	2.3	6	156	87	24359	176	132	fldA	6	186	AAF16876.1	33
4037	84.6591	27.517	31.6	2.3	9	149	70	27517	176	137	fldA	6	150	3QFC_A	23
4038	84.6591	27.517	31.6	2.4	9	149	70	27517	176	137	fldA	6	150	3QE2_A	23
4039	84.6591	27.517	31.6	2.4	9	149	70	27517	176	137	fldA	6	150	5EMN_A	23
4040	84.6591	27.517	31.6	2.4	9	149	70	27517	176	137	fldA	6	150	3QFR_A	23
4041	84.6591	27.517	31.6	2.4	9	149	70	27517	176	137	fldA	6	150	5FA6_A	23
4042	84.6591	27.517	31.6	2.6	9	149	70	27517	176	137	fldA	6	212	CAH56151.1	85
4043	57.9545	25.49	30.8	2.6	4	102	53	25490	176	91	fldA	6	116	1B1C_A	22
4044	84.6591	27.517	31.6	2.7	9	149	70	27517	176	137	fldA	6	212	BAF83218.1	85
4045	88.6364	24.359	31.6	2.7	6	156	87	24359	176	132	fldA	6	159	AAC39667.1	6
4046	84.6591	27.517	31.6	2.7	9	149	70	27517	176	137	fldA	6	212	NP_000932.3	85
4047	84.6591	27.517	31.6	2.8	9	149	70	27517	176	137	fldA	6	212	AAH34277.1	85
4048	84.6591	27.517	31.6	2.8	9	149	70	27517	176	137	fldA	6	209	P16435.2	82
4049	84.6591	27.517	31.6	2.8	9	149	70	27517	176	137	fldA	6	212	BAG35442.1	85
4050	84.6591	27.517	31.6	2.8	9	149	70	27517	176	137	fldA	6	209	BAB18572.1	82
4051	84.6591	27.517	31.6	2.9	9	149	70	27517	176	137	fldA	6	208	AAB21814.1	81
4052	84.6591	27.517	31.6	3	9	149	70	27517	176	137	fldA	6	218	BAD93111.1	91
4053	57.9545	25.49	31.2	3.3	4	102	53	25490	176	91	fldA	6	216	EAW71780.1	122
4054	39.7727	22.857	29.3	8.6	1	70	53	22857	176	175	fldA	107	107	EAW81426.1	38
4083	42.2222	34.586	60.1	7.05e-09	4	133	76	34586	315	132	fmt	5	127	NP_001257294.1	1
4084	42.2222	34.586	60.1	7.05e-09	4	133	76	34586	315	132	fmt	5	127	BAG57647.1	1
4085	37.1429	23.077	45.4	0.000109	0	117	90	23077	315	193	fmt	77	190	1ZLX_A	74
4086	37.1429	23.077	45.1	0.000169	0	117	90	23077	315	193	fmt	77	190	1ZLY_A	74
4087	37.1429	23.077	45.8	0.000171	0	117	90	23077	315	193	fmt	77	289	AAA60077.1	173
4088	37.1429	23.077	45.1	0.000178	0	117	90	23077	315	193	fmt	77	190	1MEO_A	74
4089	37.1429	23.077	44.7	0.00021	0	117	90	23077	315	193	fmt	77	191	4ZZ1_A	75
4090	37.1429	23.077	44.7	0.000253	0	117	90	23077	315	193	fmt	77	201	1MEJ_B	85
4091	36.1905	23.684	43.5	0.000502	0	114	87	23684	315	193	fmt	80	191	5J9F_A	78
4092	37.1429	23.077	44.3	0.000711	0	117	90	23077	315	193	fmt	77	549	BAG58755.1	433
4093	31.746	27	44.3	0.000827	1	100	71	27000	315	174	fmt	77	980	BAF85249.1	881
4094	31.746	27	44.3	0.000842	1	100	71	27000	315	174	fmt	77	980	AAI07713.1	881
4095	31.746	27	44.3	0.000849	1	100	71	27000	315	174	fmt	77	980	NP_000810.1	881
4096	31.746	27	44.3	0.000885	1	100	71	27000	315	174	fmt	77	1016	BAD92022.1	917
4097	25.0794	34.177	40	0.01	2	79	47	34177	315	278	fmt	203	77	CAH10368.1	1
4098	23.4921	25.676	32.7	1.3	0	74	55	25676	315	253	fmt	180	74	BAG57739.1	1
4119	84.9057	28.889	50.1	2.18e-07	7	135	76	28889	159	158	folA	42	133	NP_001277283.1	1
4120	115.094	26.23	49.3	7.97e-07	8	183	109	26230	159	158	folA	1	185	BAG53658.1	4
4121	115.094	26.23	49.3	8.64e-07	8	183	109	26230	159	158	folA	1	185	AAH63379.1	4
4122	115.094	26.23	49.3	8.9e-07	8	183	109	26230	159	158	folA	1	185	NP_789785.1	4
4123	74.8428	28.571	39.7	0.001	5	119	66	28571	159	101	folA	2	123	NP_001277286.1	5
4124	35.2201	35.714	29.3	8.9	2	56	33	35714	159	76	folA	23	115	NP_055397.1	61
4125	35.2201	35.714	29.3	9.3	2	56	33	35714	159	76	folA	23	115	CAB71326.1	61
4126	35.2201	35.714	28.9	9.5	2	56	33	35714	159	76	folA	23	115	EAW88159.1	61
4141	16.1137	35.294	33.1	1.9	2	68	39	35294	422	81	folC	19	128	AAP35285.1	61
4142	16.1137	35.294	33.1	2	2	68	39	35294	422	81	folC	19	128	BAG37904.1	61
4143	7.34597	45.161	33.1	2.1	0	31	17	45161	422	81	folC	51	128	EAW87700.1	98
4144	33.1754	27.143	33.5	3.4	5	140	81	27143	422	325	folC	195	693	NP_001353218.1	566
4145	33.1754	27.143	33.1	4.5	5	140	81	27143	422	325	folC	195	693	EAW70631.1	566
4146	33.1754	27.143	33.1	4.6	5	140	81	27143	422	325	folC	195	1056	NP_001353219.1	929
4147	33.1754	27.143	33.1	4.7	5	140	81	27143	422	325	folC	195	856	NP_001099007.1	729
4148	33.1754	27.143	32.7	6	5	140	81	27143	422	325	folC	195	856	BAA13242.3	729
4149	33.1754	27.143	32.7	6.2	5	140	81	27143	422	325	folC	195	856	EAW70630.1	729
4210	59.375	25.731	53.9	2.12e-07	3	171	120	25731	288	202	folD	34	263	NP_001229698.1	98
4211	51.7361	27.517	48.9	4.5e-06	4	149	99	27517	288	202	folD	59	154	NP_001337420.1	10
4212	60.4167	26.437	49.7	6.67e-06	5	174	116	26437	288	202	folD	34	264	NP_001337417.1	98
4213	44.0972	28.346	45.8	9.95e-05	3	127	84	28346	288	158	folD	34	219	NP_001337418.1	98
4214	33.6806	25.773	41.2	0.005	1	97	71	25773	288	240	folD	144	97	AAH17477.2	2
4215	33.3333	27.083	31.6	1.9	3	96	49	27083	288	126	folD	52	111	ACS96207.1	16
4216	46.875	27.407	32.7	2.8	6	135	83	27407	288	227	folD	100	290	NP_001180208.1	164
4217	46.875	27.407	32.3	3	6	135	83	27407	288	227	folD	100	290	AAC32998.1	164
4218	46.875	27.407	32	4.5	6	135	83	27407	288	227	folD	100	290	AAG50192.1	164
4219	16.6667	37.5	30.8	4.5	0	48	30	37500	288	206	folD	159	54	EAW66038.1	7
4220	10.7639	41.935	29.3	5.8	1	31	13	41935	288	140	folD	115	54	NP_001263278.1	24
4221	10.7639	41.935	29.3	6	1	31	13	41935	288	140	folD	115	68	XP_011542432.1	38
4222	16.6667	37.5	31.2	7.2	0	48	30	37500	288	206	folD	159	54	AAH15943.1	7
4223	15.625	37.778	30.4	8	0	45	28	37778	288	206	folD	162	54	EAW66039.1	10
4224	21.1806	29.508	30.4	8.1	2	61	36	29508	288	212	folD	154	83	NP_001311219.1	28
4239	19.8198	52.273	55.1	4.2e-09	0	44	21	52273	222	140	folE	97	97	AAN17461.1	54
4240	19.8198	52.273	52.8	1.33e-08	0	44	21	52273	222	140	folE	97	69	EAW80652.1	26
4241	39.6396	21.591	33.5	0.84	1	88	61	21591	222	218	folE	131	199	AAG35613.1	120
4242	25.6757	35.088	33.9	0.94	1	57	34	35088	222	105	folE	52	374	CAH18105.1	318
4243	39.6396	21.591	32.7	1.2	1	88	61	21591	222	218	folE	131	199	AAG35614.1	120
4244	25.6757	35.088	33.5	1.3	1	57	34	35088	222	105	folE	52	820	AAR13367.1	764
4245	25.6757	35.088	33.5	1.3	1	57	34	35088	222	105	folE	52	820	CAD98045.1	764
4246	25.6757	35.088	33.1	1.3	1	57	34	35088	222	105	folE	52	820	CAD97857.1	764
4247	25.6757	35.088	33.5	1.3	1	57	34	35088	222	105	folE	52	820	NP_055861.3	764
4248	25.6757	35.088	33.1	1.3	1	57	34	35088	222	105	folE	52	820	AAI37351.1	764
4249	25.6757	35.088	33.1	1.3	1	57	34	35088	222	105	folE	52	820	NP_001338457.1	764
4250	25.6757	35.088	33.1	1.3	1	57	34	35088	222	105	folE	52	806	BAA31600.2	750
4251	25.6757	35.088	33.1	1.3	1	57	34	35088	222	105	folE	52	820	XP_011516710.1	764
4252	25.6757	35.088	33.1	1.4	1	57	34	35088	222	105	folE	52	820	XP_011516708.1	764
4253	25.6757	35.088	33.1	1.5	1	57	34	35088	222	105	folE	52	820	XP_011516709.1	764
4254	39.6396	21.591	32.7	1.8	1	88	61	21591	222	218	folE	131	111	BAG58937.1	32
4255	39.6396	21.591	32.7	1.8	1	88	61	21591	222	218	folE	131	199	NP_066968.3	120
4256	39.6396	21.591	32.7	1.8	1	88	61	21591	222	218	folE	131	199	AAH70064.1	120
4257	39.6396	21.591	32.7	1.9	1	88	61	21591	222	218	folE	131	111	NP_001135798.1	32
4258	39.6396	21.591	32.7	2	1	88	61	21591	222	218	folE	131	140	XP_016868358.1	61
4259	39.6396	21.591	32.7	2	1	88	61	21591	222	218	folE	131	158	XP_011515041.1	79
4260	54.0541	25	32.3	2	5	120	71	25000	222	183	folE	66	147	BAG61773.1	45
4261	39.6396	21.591	32.7	2.1	1	88	61	21591	222	218	folE	131	199	XP_016868357.1	120
4262	39.6396	21.591	32	2.1	1	88	61	21591	222	218	folE	131	158	BAG58163.1	79
4263	39.6396	21.591	32.3	2.3	1	88	61	21591	222	218	folE	131	199	EAW76965.1	120
4264	39.6396	21.591	32.3	2.4	1	88	61	21591	222	218	folE	131	158	XP_016868359.1	79
4265	54.0541	25	31.6	3.6	5	120	71	25000	222	183	folE	66	184	BAG61649.1	82
4266	39.6396	29.545	30.4	4.7	2	88	59	29545	222	191	folE	106	103	AAF80077.1	17
4267	40.0901	22.472	30	5.5	1	89	68	22472	222	192	folE	105	106	ABK81504.1	18
4268	6.30631	71.429	30	5.8	0	14	4	71429	222	191	folE	178	108	BAC01976.1	95
4269	54.0541	25	30.8	7.5	5	120	71	25000	222	183	folE	66	261	EAW73070.1	159
4270	37.3874	30.12	29.6	8.3	3	83	54	30120	222	184	folE	106	105	ADX66001.1	23
4271	42.7928	28.421	29.6	8.6	3	95	60	28421	222	194	folE	106	128	CAA84503.1	36
4272	24.7748	29.091	30	9.4	1	55	38	29091	222	183	folE	130	56	BAH14352.1	2
4273	30.1418	27.059	30	7.7	1	85	61	27059	282	280	folP	197	113	BAB14923.1	29
4274	9.21986	42.308	28.1	7.8	0	26	15	42308	282	76	folP	51	27	EAW95614.1	2
4275	30.1418	27.059	30	8.6	1	85	61	27059	282	280	folP	197	113	AAQ13606.1	29
4284	84.3243	29.487	57.8	1.92e-09	4	156	103	29487	185	165	frr	13	243	EAX11869.1	92
4285	63.7838	30.508	46.6	1.54e-05	4	118	72	30508	185	109	frr	1	194	NP_954646.1	78
4286	63.7838	30.508	46.2	2.36e-05	4	118	72	30508	185	109	frr	1	215	XP_011517487.1	99
4287	68.932	23.944	30.4	1.9	1	71	49	23944	103	96	ftsB	31	1797	AAC50064.1	1727
4288	68.932	23.944	30.4	1.9	1	71	49	23944	103	96	ftsB	31	1797	BAA05385.1	1727
4289	68.932	23.944	30.4	1.9	1	71	49	23944	103	96	ftsB	31	1467	BAD92976.1	1397
4290	68.932	23.944	30.4	1.9	1	71	49	23944	103	96	ftsB	31	1797	NP_002215.2	1727
4291	68.932	23.944	30	2	1	71	49	23944	103	96	ftsB	31	1736	XP_011512879.1	1666
4307	25	25.466	43.9	0.003	4	161	102	25466	644	606	ftsH	456	691	XP_011523903.1	539
4336	8.85093	42.105	47.4	0.000214	0	57	33	42105	644	382	ftsH	326	57	CAB70717.1	1
4423	9.31677	41.667	48.5	5.84e-05	0	60	35	41667	644	382	ftsH	323	60	AAG29874.1	1
4509	12.5776	37.037	59.7	3.31e-08	1	81	50	37037	644	216	ftsH	137	691	NP_001304728.1	611
4572	10.559	33.824	42.7	0.007	1	68	44	33824	644	254	ftsH	188	512	BAG57363.1	445
4574	10.559	33.824	42.7	0.007	1	68	44	33824	644	254	ftsH	188	512	BAG57980.1	445
4576	10.559	33.824	42.7	0.007	1	68	44	33824	644	254	ftsH	188	512	BAH14428.1	445
4578	10.559	33.824	42.7	0.007	1	68	44	33824	644	254	ftsH	188	564	BAG57874.1	497
4580	10.559	33.824	42.7	0.007	1	68	44	33824	644	254	ftsH	188	606	NP_006169.2	539
[truncated: 5,173 more rows]

## Sheet: Hit vs no hit
	Hits	Hits over cutoff	Hits under cutoff	No hits
0	dicA	pth	dicA	yobI
1	guaA	aspS	rbfA	mrdA
2	murC	gmk	yciS	ftsA
3	yciS	tsf	rpsF	ftsI
4	ybeY	rpoC	rpsE	csrA
5	pth	tktA	lpxB	rpsT
6	ppa	nrdA	tusE	dapB
7	ihfA	adk	ubiD	lolE
8	lepB	trmD	mreB	hemG
9	aspS	asnS	mreC	murB
10	tusE	psd	priB	murF
11	rpmC	plsC	mreD	yqgF
12	gmk	plsB	ycaR	folB
13	ubiE	leuS	ptsI	rpsD
14	bamA	ssb	rnt	rnpA
15	mreB	nadK	glmU	ribC
16	mreC	hemH	ftsB	ribE
17	priB	tmk	hemA	ribF
18	mreD	glmS	hemD	pheM
19	ileS	hemL	safA	rpoE
20	tktA	rluD	ftsW	lexA
21	gapA	hemB	ftsQ	dapF
22	rnt	hemC	ftsZ	infC
23	glyS	grpE	lolC	mukB
24	adk	hemE	lolB	rpmD
25	metG	glmM	waaA	lgt
26	sucA	ftsY	ftsL	dnaT
27	secY	dapA	dapD	dnaB
28	asnS	hscA	rplX	holD
29	psd	acpP	acpS	dnaN
30	pgk	lolD	rplV	lpxC
31	ptsI	rplT	lnt	fabA
32	plsC	ffh	rplU	fabH
33	plsB	proS	rplR	trpL
34	leuS	rplQ	rplS	mrdB
35	cydA	rplN	rplP	rpmI
36	rpsH	rplM	kdsA	lptG
37	ssb	rplK	kdsB	lptD
38	nadK	hisS	rplJ
39	hemH	tsaD	nadE
40	glmU	rplD	birA
41	glmS	ftsH	nadD
42	hemL	rplB	rplA
43	hemB	rplC	cydX
44	hemC	lipA	murI
45	ftsL	gapA	murJ
46	grpE	nrdB	folP
47	ftsH	ligA	murA
48	ftsW	thyA	murC
49	msbA	folE	murD
50	glyA	folD	murE
51	lipA	folA	murG
52	ftsQ	metG	cydA
53	dnaX	folC	cydB
54	rpe	metK	dnaG
55	glmM	cydC	dcd
56	ftsZ	cydD	rpoA
57	ftsY	prfA	lolA
58	dapA	prfB	asd
59	lolB	tadA	ribA
60	waaA	orn	rpoH
61	hemA	rpoB	ribD
62	acpP	cdsA	lpxH
63	dapD	cysS	lpxK
64	rplX	gltX	lpxL
65	acpS	prmC	iraM
66	rplV	ispU	lpxA
67	lnt	argS	zipA
68	rplT	pheS	lpxD
69	ffh	gpsA	ispH
70	proS	ileS	pyrH
71	rplS	ispD	rimM
72	rplP	obgE	ispF
73	rplQ	ispA	ispG
74	rplN	ispB	glyS
75	kdsA	rpsG	ppa
76	kdsB	tyrS	glyQ
77	rplM	rpsB	rpsC
78	rplJ	rpsA	rpsO
79	hemD	rpsN	rpsM
80	hisS	rpsL	rpoD
81	birA	rpsK	rpsJ
82	tsaD	pgk	rpsH
83	lolC	rpsI	rpsU
84	safA	dfp	rpsS
85	rplB	pyrG	rpsR
86	rplC	glyA	rpsQ
87	rplA	rpe	yrfF
88	cydX	rpsP	tonB
89	nrdA	dapE	mraY
90	murJ	thrS	bamD
91	folP	guaA	rplY
92	murA	accD	accA
93	thyA	fmt	wzyE
94	rbfA	pgsA	accB
95	murD	bamA	mukF
96	murE	accC	fbaA
97	murG	frr	rplW
98	folE	dut	lspA
99	folD	pdxH	mukE
100	folA	suhB	ubiX
101	trmD	serS	infA
102	folC	infB	rpmH
103	holB	yihA	thiL
104	rho	ubiH	ihfA
105	metK	rpmA	rpmC
106	cydB	ubiG	rpmB
107	cydC	ubiE	rpmF
108	cydD	ubiB	parC
109	era	ubiA	rplO
110	prfA	parE	nusG
111	prfB	groL	ydfO
112	dcd	purB	nusB
113	rpoC	dnaX	rplL
114	rpoB	der	dnaA
115	rpoA	nusA	dnaC
116	lolA	alaS	dnaE
117	asd	era	can
118	ribA	fdx	hda
119	rpoH	def	holB
120	ribD	msbA	holA
121	cysS	mnmA	lepB
122	lpxH	dxs	dxr
123	orn	fabD	tilS
124	lpxK	fabG	fabZ
125	lpxL	prs	rplF
126	tmk	fabB	rsgA
127	iraM	fabI	ygfZ
128	ispU	rplE	yidC
129	zipA	aceF	ybeY
130	argS	eno	higA
131	lpxD	erpA	secA
132	ftsB	glnS	tsaB
133	pheS	trpS	tsaC
134	tsf	fldA	secE
135	ispH	map	tsaE
136	def	gyrB	ydhL
137	pheT	gyrA	pssA
138	ispD	pheT	hipB
139	rimM	valS	rho
140	ispF	coaE	ispE
141	ispG	lysS	secY
142	ispA	iscU	coaD
143	ispB	iscS	coaA
144	gyrB	sucA	lptE
145	rpsG	sucB	lptF
146	rpsF	topA	cca
147	rpsE	fusA	lptA
148	glyQ	groS
149	rpsC	lpd
150	rpsB	lptB
151	rpsA
152	rpsO
153	rpsN
154	rpsM
155	rpsL
156	rpsK
157	rpsJ
158	rpsI
159	dfp
160	rluD
161	rpsU
162	hscA
163	rpsS
164	rpsR
165	rpsQ
166	rpsP
167	dapE
168	rplD
169	yrfF
170	tonB
171	prmC
172	mraY
173	bamD
174	accD
175	fmt
176	lolD
177	accA
178	wzyE
179	accC
180	accB
181	frr
182	tyrS
183	hemE
184	mukF
185	fbaA
186	rplW
187	lspA
188	tadA
189	coaD
190	iscU
191	suhB
192	rplU
193	mukE
194	ubiX
195	gltX
196	rplR
197	infB
198	infA
199	yihA
200	rplK
201	dut
202	ubiH
203	thiL
204	rpmA
205	ubiG
206	ubiD
207	rpmB
208	ubiB
209	ubiA
210	parE
211	parC
212	groL
213	rplO
214	nusG
215	der
216	nusB
217	rplL
218	nusA
219	dnaA
220	dnaC
221	alaS
222	dnaE
223	can
224	hda
225	lpxA
226	cdsA
227	lpxB
228	holA
229	obgE
230	groS
231	mnmA
232	dxs
233	dxr
234	tilS
235	fabZ
236	purB
237	fabG
238	prs
239	fabB
240	fabI
241	rsgA
242	serS
243	ygfZ
244	yidC
245	rplE
246	gpsA
247	rpoD
248	rplF
249	ispE
250	aceF
251	eno
252	erpA
253	thrS
254	gyrA
255	glnS
256	trpS
257	nadE
258	fldA
259	secA
260	map
261	tsaB
262	tsaC
263	secE
264	tsaE
265	ydhL
266	ydfO
267	pssA
268	nrdB
269	hipB
270	lptB
271	valS
272	higA
273	pyrH
274	pyrG
275	murI
276	lysS
277	coaA
278	ligA
279	pdxH
280	lpd
281	coaE
282	iscS
283	rpmH
284	dnaG
285	pgsA
286	ycaR
287	nadD
288	fdx
289	fabD
290	sucB
291	topA
292	fusA
293	lptE
294	lptF
295	rplY
296	cca
297	lptA
298	rpmF

## Sheet: Original results
	qseqid	sseqid	pident	length	mismatch	gapopen	qstart	qend	sstart	send	evalue	bitscore	prot length	% id	% alignment
0	accA	BAH13894.1	30000	160	94	4	85	239	236	382	5.65e-08	57	319	30	50.1567
1	accA	AAA60036.1	33065	124	70	3	85	208	40	150	8.9e-08	53.5	319	33.065	38.8715
2	accA	NP_001171485.1	29375	160	95	4	85	239	348	494	3.03e-07	54.7	319	29.375	50.1567
3	accA	ANZ79615.1	29375	160	95	4	85	239	348	494	3.17e-07	54.7	319	29.375	50.1567
4	accA	AAB28900.1	29375	160	95	4	85	239	328	474	3.26e-07	54.7	319	29.375	50.1567
5	accA	CAA51825.1	29375	160	95	4	85	239	328	474	3.29e-07	54.7	319	29.375	50.1567
6	accA	NP_000523.2	29375	160	95	4	85	239	328	474	3.38e-07	54.7	319	29.375	50.1567
7	accA	BAD92246.1	29375	160	95	4	85	239	334	480	4.82e-07	54.3	319	29.375	50.1567
8	accA	AAG17227.1	32632	95	52	2	85	179	184	266	4.27e-05	47.4	319	32.632	29.7806
9	accA	BAH13735.1	32632	95	52	2	85	179	245	327	5.42e-05	47.4	319	32.632	29.7806
10	accA	AAH18013.1	30097	103	66	2	142	239	20	121	0.000225	44.3	319	30.097	32.2884
11	accA	NP_001350076.1	25954	131	75	3	83	213	306	414	0.27	36.2	319	25.954	41.0658
12	accA	NP_071415.1	25954	131	75	3	83	213	344	452	0.4	35.4	319	25.954	41.0658
13	accA	NP_071415.1	24823	141	91	3	83	216	97	229	8.5	31.2	319	24.823	44.2006
14	accA	EAW95692.1	25954	131	75	3	83	213	213	321	0.46	35.4	319	25.954	41.0658
15	accA	XP_016865177.1	24823	141	91	3	83	216	97	229	2.1	33.1	319	24.823	44.2006
16	accA	XP_011541831.1	24823	141	91	3	83	216	97	229	2.5	32.7	319	24.823	44.2006
17	accA	XP_016860308.1	27869	61	41	1	221	281	11592	11649	4	32.7	319	27.869	19.1223
18	accA	EAX11013.1	27869	61	41	1	221	281	11550	11607	4.1	32.7	319	27.869	19.1223
19	accA	ALQ34200.1	24823	141	91	3	83	216	97	229	4.5	32	319	24.823	44.2006
20	accA	BAG52236.1	25301	83	59	1	137	216	16	98	4.9	31.6	319	25.301	26.0188
21	accA	Q8NDH2.2	23611	144	84	4	185	305	2012	2152	6.6	32	319	23.611	45.1411
22	accA	XP_011519408.1	23611	144	84	4	185	305	6601	6741	6.8	32	319	23.611	45.1411
23	accA	EAX09063.1	23611	144	84	4	185	305	6489	6629	6.9	32	319	23.611	45.1411
24	accA	NP_001139669.1	23611	144	84	4	185	305	6641	6781	6.9	32	319	23.611	45.1411
25	accB	2EJM_A	37500	72	38	1	85	156	19	83	3.95e-07	48.5	156	37.5	46.1538
26	accB	2JKU_A	36111	72	44	1	87	156	23	94	1.49e-06	47	156	36.111	46.1538
27	accB	NP_001280202.1	37500	72	38	1	85	156	534	598	1.97e-06	49.3	156	37.5	46.1538
28	accB	BAD92974.1	37500	72	38	1	85	156	667	731	2.21e-06	48.9	156	37.5	46.1538
29	accB	NP_064551.3	37500	72	38	1	85	156	651	715	2.24e-06	48.9	156	37.5	46.1538
30	accB	AAG50245.1	37500	72	38	1	85	156	651	715	2.47e-06	48.9	156	37.5	46.1538
31	accB	AAK67986.1	37500	72	38	1	85	156	651	715	2.47e-06	48.9	156	37.5	46.1538
32	accB	XP_011511294.1	37500	72	38	1	85	156	613	677	2.8e-06	48.9	156	37.5	46.1538
33	accB	CAH18403.1	37500	72	38	1	85	156	501	565	2.96e-06	48.5	156	37.5	46.1538
34	accB	NP_001350809.1	37500	72	38	1	85	156	542	606	3.09e-06	48.5	156	37.5	46.1538
35	accB	AAA36424.1	36232	69	42	1	90	156	28	96	9.28e-06	44.7	156	36.232	44.2308
36	accB	EAX09032.1	37879	66	39	1	93	156	436	501	4.66e-05	45.1	156	37.879	42.3077
37	accB	NP_001339535.1	37879	66	39	1	93	156	615	680	5.31e-05	45.1	156	37.879	42.3077
38	accB	NP_001339537.1	37879	66	39	1	93	156	589	654	5.33e-05	45.1	156	37.879	42.3077
39	accB	BAG59350.1	37879	66	39	1	93	156	637	702	5.75e-05	45.1	156	37.879	42.3077
40	accB	NP_001339539.1	37879	66	39	1	93	156	348	413	5.76e-05	44.7	156	37.879	42.3077
41	accB	NP_001121164.1	37879	66	39	1	93	156	637	702	5.81e-05	45.1	156	37.879	42.3077
42	accB	NP_001339534.1	37879	66	39	1	93	156	645	710	5.82e-05	45.1	156	37.879	42.3077
43	accB	NP_001339541.1	37879	66	39	1	93	156	300	365	5.83e-05	44.7	156	37.879	42.3077
44	accB	NP_000273.2	37879	66	39	1	93	156	663	728	5.84e-05	45.1	156	37.879	42.3077
45	accB	NP_001339540.1	37879	66	39	1	93	156	330	395	6.14e-05	44.7	156	37.879	42.3077
46	accB	XP_016876098.1	37879	66	39	1	93	156	630	695	6.38e-05	44.7	156	37.879	42.3077
47	accB	CAA32763.1	37879	66	39	1	93	156	638	703	6.51e-05	44.7	156	37.879	42.3077
48	accB	BAG37887.1	37879	66	39	1	93	156	638	703	6.7e-05	44.7	156	37.879	42.3077
49	accB	NP_001171475.1	40385	52	31	0	105	156	630	681	0.00024	43.1	156	40.385	33.3333
50	accB	BAG60571.1	40385	52	31	0	105	156	630	681	0.00025	43.1	156	40.385	33.3333
51	accB	NP_001339536.1	40385	52	31	0	105	156	604	655	0.000251	43.1	156	40.385	33.3333
52	accB	AAA36423.1	35294	51	33	0	106	156	46	96	0.33	32.3	156	35.294	32.6923
53	accB	3BG9_A	35294	51	33	0	106	156	668	718	0.34	33.9	156	35.294	32.6923
54	accB	3BG3_A	35294	51	33	0	106	156	668	718	0.34	33.9	156	35.294	32.6923
55	accB	XP_011543389.1	35294	51	33	0	106	156	696	746	0.35	33.9	156	35.294	32.6923
56	accB	NP_071504.2	35294	51	33	0	106	156	1128	1178	0.35	33.9	156	35.294	32.6923
57	accB	AAB31500.1	35294	51	33	0	106	156	1128	1178	0.35	33.9	156	35.294	32.6923
58	accB	AAA82937.1	35294	51	33	0	106	156	1128	1178	0.36	33.9	156	35.294	32.6923
59	accB	XP_006718642.1	35294	51	33	0	106	156	621	671	0.36	33.9	156	35.294	32.6923
60	accB	AAA57261.1	31959	97	59	5	25	121	236	325	0.78	32.7	156	31.959	62.1795
61	accB	AAQ88624.1	37255	51	30	2	63	112	25	74	2.2	31.2	156	37.255	32.6923
62	accB	CAA57709.1	31959	97	59	5	25	121	901	990	2.5	31.2	156	31.959	62.1795
63	accB	EAW70039.1	31959	97	59	5	25	121	902	991	2.5	31.2	156	31.959	62.1795
64	accB	NP_002499.2	31959	97	59	5	25	121	902	991	2.5	31.2	156	31.959	62.1795
65	accB	AAB66315.1	24444	135	72	3	9	143	14	118	2.5	31.2	156	24.444	86.5385
66	accB	BAD92685.1	31959	97	59	5	25	121	901	990	2.5	31.2	156	31.959	62.1795
67	accB	AAA59932.1	31959	97	59	5	25	121	902	991	2.5	31.2	156	31.959	62.1795
68	accB	1ZY8_K	34091	44	29	0	100	143	22	65	2.7	30.8	156	34.091	28.2051
69	accB	XP_011542497.1	31959	97	59	5	25	121	860	949	3.1	31.2	156	31.959	62.1795
70	accB	AAH45606.1	31959	97	59	5	25	121	769	858	3.4	30.8	156	31.959	62.1795
71	accB	EAW70041.1	31959	97	59	5	25	121	769	858	3.5	30.8	156	31.959	62.1795
72	accB	NP_001128496.1	34091	44	29	0	100	143	60	103	3.7	30.8	156	34.091	28.2051
73	accB	XP_011518692.1	36842	38	24	0	106	143	21	58	3.8	30.8	156	36.842	24.359
74	accB	AAH10389.1	36842	38	24	0	106	143	81	118	4.1	30.4	156	36.842	24.359
75	accB	BAG35370.1	36842	38	24	0	106	143	81	118	4.2	30.4	156	36.842	24.359
76	accB	AAC39661.1	34091	44	29	0	100	143	75	118	4.2	30.4	156	34.091	28.2051
77	accB	NP_003468.2	36842	38	24	0	106	143	81	118	4.2	30.4	156	36.842	24.359
78	accB	CAA73606.1	36842	38	24	0	106	143	81	118	4.2	30.4	156	36.842	24.359
79	accB	2DNC_A	35897	39	25	0	106	144	32	70	5.3	28.9	156	35.897	25
80	accB	AAA60033.1	33333	42	28	0	115	156	3	44	6.4	27.7	156	33.333	26.9231
81	accB	AAS18315.1	30556	72	48	2	11	80	1129	1200	9.7	29.6	156	30.556	46.1538
82	accC	AAK67986.1	47912	455	228	6	2	449	49	501	3.81e-143	428	449	47.912	101.336
83	accC	XP_011511294.1	47692	455	229	6	2	449	11	463	8.54e-143	426	449	47.692	101.336
84	accC	NP_064551.3	47692	455	229	6	2	449	49	501	1.59e-142	427	449	47.692	101.336
85	accC	AAG50245.1	47692	455	229	6	2	449	49	501	2.03e-142	426	449	47.692	101.336
86	accC	BAD92974.1	47473	455	230	6	2	449	65	517	3.9e-141	424	449	47.473	101.336
87	accC	XP_016876105.1	48984	443	221	5	2	440	63	504	8.49e-141	416	449	48.984	98.6637
88	accC	EAW78339.1	49640	417	204	5	2	414	11	425	1.1e-140	412	449	49.64	92.8731
89	accC	NP_001339538.1	48984	443	221	5	2	440	63	504	8.11e-140	417	449	48.984	98.6637
90	accC	NP_001339536.1	48984	443	221	5	2	440	37	478	9.97e-140	417	449	48.984	98.6637
91	accC	XP_016876104.1	48984	443	221	5	2	440	63	504	1.35e-139	416	449	48.984	98.6637
92	accC	CAA32763.1	48984	443	221	5	2	440	38	479	1.86e-139	418	449	48.984	98.6637
93	accC	XP_016876098.1	48984	443	221	5	2	440	30	471	2.03e-139	418	449	48.984	98.6637
94	accC	NP_001121164.1	48984	443	221	5	2	440	37	478	2.13e-139	418	449	48.984	98.6637
95	accC	XP_016876102.1	48984	443	221	5	2	440	63	504	2.19e-139	417	449	48.984	98.6637
96	accC	BAG60571.1	48984	443	221	5	2	440	63	504	2.35e-139	417	449	48.984	98.6637
97	accC	BAG37887.1	48984	443	221	5	2	440	38	479	2.42e-139	418	449	48.984	98.6637
98	accC	NP_001171475.1	48984	443	221	5	2	440	63	504	2.62e-139	417	449	48.984	98.6637
99	accC	NP_001339534.1	48984	443	221	5	2	440	63	504	3.15e-139	418	449	48.984	98.6637
100	accC	XP_016876101.1	48984	443	221	5	2	440	63	504	3.47e-139	417	449	48.984	98.6637
101	accC	XP_016876100.1	48984	443	221	5	2	440	63	504	3.88e-139	417	449	48.984	98.6637
102	accC	XP_016876096.1	48984	443	221	5	2	440	30	471	5.04e-139	417	449	48.984	98.6637
103	accC	XP_016876095.1	48984	443	221	5	2	440	37	478	6.41e-139	417	449	48.984	98.6637
104	accC	NP_000273.2	48984	443	221	5	2	440	63	504	7.79e-139	417	449	48.984	98.6637
105	accC	XP_011519395.1	48984	443	221	5	2	440	63	504	1.25e-138	416	449	48.984	98.6637
106	accC	XP_016876094.1	48984	443	221	5	2	440	63	504	1.91e-138	417	449	48.984	98.6637
107	accC	BAG59350.1	48758	443	222	5	2	440	37	478	2.22e-138	415	449	48.758	98.6637
108	accC	BAG58277.1	45813	406	214	5	36	437	36	439	2.6e-122	367	449	45.813	90.4232
109	accC	BAG60062.1	45735	422	219	7	2	415	37	456	9.88e-118	357	449	45.735	93.9866
110	accC	NP_071504.2	44098	449	241	7	2	442	37	483	6.49e-117	371	449	44.098	100
111	accC	AAA82937.1	43875	449	242	7	2	442	37	483	1.76e-116	370	449	43.875	100
112	accC	AAB31500.1	44098	449	241	7	2	442	37	483	2.02e-116	370	449	44.098	100
113	accC	NP_001350809.1	46292	391	201	6	66	449	4	392	9.15e-115	352	449	46.292	87.0824
114	accC	NP_001339537.1	42664	443	201	6	2	440	37	430	1e-107	335	449	42.664	98.6637
115	accC	NP_001339535.1	42664	443	201	6	2	440	63	456	1.52e-107	335	449	42.664	98.6637
116	accC	BAG57977.1	45355	366	191	6	91	449	3	366	1.32e-105	322	449	45.355	81.5145
117	accC	EAX09032.1	52027	296	140	2	2	296	63	357	1.53e-96	301	449	52.027	65.9243
118	accC	CAH18403.1	45509	334	173	6	123	449	20	351	7.31e-95	299	449	45.509	74.3875
119	accC	NP_001280202.1	45509	334	173	6	123	449	53	384	1.95e-94	299	449	45.509	74.3875
120	accC	2YL2_A	32341	504	274	12	1	442	40	538	1.85e-76	250	449	32.341	112.249
121	accC	3GID_A	31683	505	275	12	1	441	39	537	1.08e-73	243	449	31.683	112.472
122	accC	2HJW_A	31683	505	275	12	1	441	49	547	2.63e-73	243	449	31.683	112.472
123	accC	3JRW_A	31683	505	275	12	1	441	55	553	2.67e-73	243	449	31.683	112.472
124	accC	4HQ6_A	31683	505	275	12	1	441	49	547	2.83e-73	243	449	31.683	112.472
125	accC	3JRX_A	31683	505	275	12	1	441	55	553	2.94e-73	243	449	31.683	112.472
126	accC	6G2D_B	31809	503	278	10	1	442	178	676	3.53e-72	250	449	31.809	112.027
127	accC	XP_006721916.1	32008	503	277	11	1	442	154	652	3.76e-72	250	449	32.008	112.027
128	accC	XP_016880042.1	32008	503	277	11	1	442	162	660	3.88e-72	250	449	32.008	112.027
129	accC	NP_942131.1	32008	503	277	11	1	442	154	652	3.99e-72	250	449	32.008	112.027
130	accC	XP_016880043.1	32008	503	277	11	1	442	162	660	4.3e-72	250	449	32.008	112.027
131	accC	NP_942135.1	31809	503	278	10	1	442	39	537	4.35e-72	250	449	31.809	112.027
132	accC	XP_011523003.1	32008	503	277	11	1	442	124	622	4.72e-72	250	449	32.008	112.027
133	accC	NP_942133.1	32008	503	277	11	1	442	117	615	4.86e-72	250	449	32.008	112.027
134	accC	NP_942134.1	31809	503	278	10	1	442	59	557	4.88e-72	250	449	31.809	112.027
135	accC	AAP94122.1	31809	503	278	11	1	442	117	615	1.68e-71	248	449	31.809	112.027
136	accC	CAE01470.2	31683	505	275	12	1	441	259	757	2.34e-70	244	449	31.683	112.472
137	accC	S41121	31412	503	280	10	1	442	117	615	2.96e-70	244	449	31.412	112.027
138	accC	XP_011536567.1	31683	505	275	12	1	441	259	757	4.23e-70	244	449	31.683	112.472
139	accC	CAE01471.3	31683	505	275	12	1	441	259	757	9.12e-70	243	449	31.683	112.472
140	accC	NP_001084.3	31683	505	275	12	1	441	259	757	9.47e-70	243	449	31.683	112.472
141	accC	ABF48723.1	31683	505	275	12	1	441	259	757	9.66e-70	243	449	31.683	112.472
142	accC	XP_016874741.1	31683	505	275	12	1	441	57	555	1.12e-69	243	449	31.683	112.472
143	accC	XP_011536565.1	31683	505	275	12	1	441	259	757	1.14e-69	243	449	31.683	112.472
144	accC	XP_006719430.1	31683	505	275	12	1	441	57	555	1.47e-69	243	449	31.683	112.472
145	accC	AAR37018.1	31485	505	276	11	1	441	259	757	1.5e-69	243	449	31.485	112.472
146	accC	XP_011536566.1	31683	505	275	12	1	441	50	548	1.67e-69	243	449	31.683	112.472
147	accC	AAC50139.1	31213	503	281	10	1	442	117	615	1.72e-66	234	449	31.213	112.027
148	accC	BAH14799.1	52000	200	93	2	66	264	4	201	2.84e-65	211	449	52	44.5434
149	accC	AAB58382.1	31128	514	267	18	1	441	258	757	1.03e-62	223	449	31.128	114.477
150	accC	EAW97855.1	30769	481	257	10	1	441	259	703	2.22e-62	221	449	30.769	107.127
151	accC	NP_001339540.1	43915	189	102	4	256	440	1	189	1.74e-43	159	449	43.915	42.0935
152	accC	NP_001339539.1	43915	189	102	4	256	440	1	189	2.89e-43	159	449	43.915	42.0935
153	accC	AAP94115.1	27404	208	115	3	1	172	59	266	9.31e-19	89	449	27.404	46.3252
154	accC	AAP94114.1	27404	208	115	3	1	172	39	246	1.15e-18	88.2	449	27.404	46.3252
155	accC	AAA60035.1	39823	113	65	3	332	441	25	137	8.02e-16	78.6	449	39.823	25.167
156	accC	2CQY_A	44330	97	53	1	114	210	7	102	1.63e-14	72.4	449	44.33	21.6036
157	accC	NP_001339541.1	29101	189	82	5	256	440	1	141	2.43e-14	77	449	29.101	42.0935
158	accC	BAA11423.1	25322	233	153	6	97	321	496	715	5.3e-10	65.1	449	25.322	51.8931
159	accC	BAA11423.1	20994	181	138	2	140	319	1069	1245	4.9e-05	49.3	449	20.994	40.3118
160	accC	AAY24293.1	24893	233	154	6	97	321	422	641	2.39e-09	63.2	449	24.893	51.8931
161	accC	AAY24293.1	20994	181	138	2	140	319	995	1171	6.78e-05	48.9	449	20.994	40.3118
162	accC	NP_004332.2	24893	233	154	6	97	321	496	715	2.53e-09	62.8	449	24.893	51.8931
163	accC	NP_004332.2	20994	181	138	2	140	319	1069	1245	6.8e-05	48.9	449	20.994	40.3118
164	accC	NP_001293008.1	27143	140	91	3	97	234	496	626	5.26e-06	52.4	449	27.143	31.1804
165	accC	NP_001293008.1	20994	181	138	2	140	319	1006	1182	6.44e-05	48.9	449	20.994	40.3118
166	accC	XP_006712164.1	27143	140	91	3	97	234	496	626	6.26e-06	52	449	27.143	31.1804
167	accC	XP_006712164.1	20994	181	138	2	140	319	1006	1182	7.09e-05	48.5	449	20.994	40.3118
168	accC	XP_024308899.1	20994	181	138	2	140	319	311	487	7.34e-05	48.5	449	20.994	40.3118
169	accC	CAE45707.1	22286	175	127	4	148	319	324	492	0.066	38.9	449	22.286	38.9755
170	accC	BAF82438.1	21311	183	135	4	140	319	1110	1286	0.071	38.9	449	21.311	40.7572
171	accC	BAF82438.1	23757	181	120	5	149	321	577	747	0.074	38.9	449	23.757	40.3118
172	accC	AAP84318.1	22286	175	127	4	148	319	667	835	0.074	38.9	449	22.286	38.9755
173	accC	AAP84318.1	22652	181	122	4	149	321	126	296	0.094	38.5	449	22.652	40.3118
174	accC	BAD92037.1	21311	183	135	4	140	319	1120	1296	0.078	38.9	449	21.311	40.7572
175	accC	BAD92037.1	23164	177	126	3	149	321	587	757	0.12	38.1	449	23.164	39.4209
176	accC	5DOT_A	22286	175	127	4	148	319	1107	1275	0.08	38.9	449	22.286	38.9755
177	accC	5DOT_A	23164	177	126	3	149	321	566	736	0.11	38.1	449	23.164	39.4209
178	accC	NP_001356185.1	21311	183	135	4	140	319	1121	1297	0.08	38.9	449	21.311	40.7572
179	accC	NP_001356185.1	23164	177	126	3	149	321	588	758	0.13	38.1	449	23.164	39.4209
180	accC	NP_001866.2	21311	183	135	4	140	319	1110	1286	0.083	38.9	449	21.311	40.7572
181	accC	NP_001866.2	23164	177	126	3	149	321	577	747	0.12	38.1	449	23.164	39.4209
182	accC	BAD74209.1	23164	177	126	3	149	321	577	747	0.11	38.5	449	23.164	39.4209
183	accC	BAD74209.1	20765	183	136	4	140	319	1110	1286	0.62	35.8	449	20.765	40.7572
184	accC	BAD74207.1	23164	177	126	3	149	321	577	747	0.11	38.5	449	23.164	39.4209
185	accC	BAD74207.1	20765	183	136	4	140	319	1110	1286	0.64	35.8	449	20.765	40.7572
186	accC	BAD74206.1	23164	177	126	3	149	321	577	747	0.11	38.1	449	23.164	39.4209
187	accC	BAD74205.1	23164	177	126	3	149	321	577	747	0.11	38.1	449	23.164	39.4209
188	accC	BAD74205.1	20765	183	136	4	140	319	1110	1286	0.68	35.8	449	20.765	40.7572
189	accC	EAW70493.1	23164	177	126	3	149	321	577	747	0.11	38.1	449	23.164	39.4209
190	accC	EAW70493.1	21311	183	135	4	140	319	1110	1286	0.16	37.7	449	21.311	40.7572
191	accC	AAB25345.1	46429	28	15	0	303	330	1	28	0.14	33.1	449	46.429	6.23608
192	accC	BAD74208.1	23164	177	126	3	149	321	577	747	0.14	37.7	449	23.164	39.4209
193	accC	BAA14328.1	22599	177	127	3	149	321	577	747	0.25	37.4	449	22.599	39.4209
194	accC	BAA14328.1	20765	183	136	4	140	319	1110	1286	0.37	36.6	449	20.765	40.7572
195	accC	AGP00960.1	34000	50	32	1	358	407	39	87	0.72	33.5	449	34	11.1359
196	accC	ADM44309.1	36000	50	31	1	358	407	31	79	1.3	33.1	449	36	11.1359
197	accC	AAC50864.1	40000	35	21	0	360	394	5	39	3.8	30.4	449	40	7.7951
198	accC	AIZ70829.1	32609	46	31	0	362	407	20	65	4.7	30	449	32.609	10.245
199	accC	CAL04346.1	43243	37	20	1	358	394	42	77	5.6	30.8	449	43.243	8.24053
200	accC	AAC50867.1	33333	48	32	0	360	407	5	52	5.7	30	449	33.333	10.6904
201	accC	CAD19271.1	34000	50	32	1	358	407	6	54	6.4	30	449	34	11.1359
202	accC	CAD19241.1	34000	50	32	1	358	407	6	54	6.6	29.6	449	34	11.1359
203	accC	AXA12438.1	34000	50	32	1	358	407	39	87	7.7	30.4	449	34	11.1359
204	accC	AIE57450.1	32000	50	33	1	358	407	11	59	8	30	449	32	11.1359
205	accC	ADA54640.1	34000	50	32	1	358	407	14	62	9.6	30	449	34	11.1359
206	accC	APZ84939.1	33333	48	32	0	360	407	40	87	9.9	30.4	449	33.333	10.6904
207	accC	APZ84906.1	33333	48	32	0	360	407	40	87	9.9	30.4	449	33.333	10.6904
208	accC	APZ84915.1	33333	48	32	0	360	407	40	87	9.9	30.4	449	33.333	10.6904
209	accC	APZ84871.1	33333	48	32	0	360	407	40	87	9.9	30.4	449	33.333	10.6904
210	accD	AAB28900.1	27461	193	127	3	50	241	59	239	1.22e-11	67.8	304	27.461	63.4868
211	accD	XP_011511175.1	27513	189	124	3	54	241	63	239	2.53e-11	66.6	304	27.513	62.1711
212	accD	NP_000523.2	27513	189	124	3	54	241	63	239	2.57e-11	67	304	27.513	62.1711
213	accD	CAA51825.1	27513	189	124	3	54	241	63	239	2.66e-11	67	304	27.513	62.1711
214	accD	CAD89898.1	27513	189	124	3	54	241	63	239	3.12e-11	65.9	304	27.513	62.1711
215	accD	BAD92246.1	27513	189	124	3	54	241	69	245	4.44e-11	66.2	304	27.513	62.1711
216	accD	ANZ79615.1	26633	199	133	6	54	241	63	259	2.81e-09	60.8	304	26.633	65.4605
217	accD	NP_001171485.1	26633	199	133	6	54	241	63	259	2.97e-09	60.8	304	26.633	65.4605
218	accD	BAH13735.1	26712	146	104	2	97	241	13	156	7.27e-08	56.2	304	26.712	48.0263
219	accD	AAG17227.1	28866	97	66	2	146	241	1	95	0.008	40.4	304	28.866	31.9079
220	accD	XP_011541831.1	23438	128	95	1	117	241	128	255	2.2	33.1	304	23.438	42.1053
221	accD	ALQ34200.1	23438	128	95	1	117	241	128	255	2.5	32.7	304	23.438	42.1053
222	accD	XP_016865177.1	23438	128	95	1	117	241	128	255	2.7	32.7	304	23.438	42.1053
223	accD	NP_057290.2	26364	110	60	5	127	226	91	189	3.5	32.3	304	26.364	36.1842
224	accD	XP_006713201.1	26364	110	60	5	127	226	90	188	3.7	32.3	304	26.364	36.1842
225	accD	BAG52236.1	24561	114	83	1	131	241	11	124	4.3	31.6	304	24.561	37.5
226	accD	NP_001307422.1	26364	110	60	5	127	226	91	189	5.5	31.6	304	26.364	36.1842
227	accD	NP_071415.1	24561	114	83	1	131	241	142	255	6.2	31.6	304	24.561	37.5
228	accD	EAW95692.1	24561	114	83	1	131	241	11	124	8.3	31.2	304	24.561	37.5
229	aceF	AAA35589.1	30649	447	245	10	206	624	59	468	5.95e-48	177	630	30.649	70.9524
230	aceF	AAA35589.1	33824	68	43	1	3	68	60	127	0.018	41.2	630	33.824	10.7937
231	aceF	AAA35589.1	36207	58	37	0	114	171	70	127	0.048	39.7	630	36.207	9.20635
232	aceF	NP_001909.3	30649	447	245	10	206	624	64	473	7.4e-48	177	630	30.649	70.9524
233	aceF	NP_001909.3	33824	68	43	1	3	68	65	132	0.017	41.2	630	33.824	10.7937
234	aceF	NP_001909.3	36207	58	37	0	114	171	75	132	0.048	39.7	630	36.207	9.20635
235	aceF	AAA64512.1	30201	447	247	10	206	624	59	468	3.37e-46	172	630	30.201	70.9524
236	aceF	AAA64512.1	33824	68	43	1	3	68	60	127	0.018	41.2	630	33.824	10.7937
237	aceF	AAA64512.1	36207	58	37	0	114	171	70	127	0.049	39.7	630	36.207	9.20635
238	aceF	BAG61505.1	33540	322	186	6	296	615	108	403	1.01e-41	159	630	33.54	51.1111
239	aceF	NP_001358968.1	33434	332	193	6	286	615	222	527	5.56e-41	159	630	33.434	52.6984
240	aceF	NP_001358971.1	33540	322	186	6	296	615	183	478	5.59e-41	158	630	33.54	51.1111
241	aceF	NP_001358966.1	29501	461	256	10	184	615	156	576	1.87e-40	159	630	29.501	73.1746
242	aceF	NP_001358965.1	33540	322	186	6	296	615	295	590	4.51e-40	157	630	33.54	51.1111
243	aceF	NP_001358969.1	33540	322	186	6	296	615	210	505	1.04e-39	155	630	33.54	51.1111
244	aceF	NP_001358967.1	33540	322	186	6	296	615	244	539	1.55e-39	155	630	33.54	51.1111
245	aceF	NP_001358963.1	33540	322	186	6	296	615	326	621	1.85e-39	156	630	33.54	51.1111
246	aceF	BAD97316.1	33540	322	186	6	296	615	337	632	1.93e-39	156	630	33.54	51.1111
247	aceF	EAW67174.1	33540	322	186	6	296	615	337	632	2.47e-39	156	630	33.54	51.1111
248	aceF	NP_001922.2	33540	322	186	6	296	615	337	632	2.47e-39	156	630	33.54	51.1111
249	aceF	BAG58983.1	29284	461	257	10	184	615	156	576	2.49e-39	155	630	29.284	73.1746
250	aceF	AAA62253.1	29284	461	256	11	184	615	179	598	1.48e-38	153	630	29.284	73.1746
251	aceF	NP_001358960.1	32923	325	190	6	296	615	337	638	1.58e-38	154	630	32.923	51.5873
252	aceF	NP_001358962.1	33540	322	179	6	296	615	337	625	7.39e-38	152	630	33.54	51.1111
253	aceF	CAA68787.1	27833	600	334	15	47	615	69	600	2.63e-37	150	630	27.833	95.2381
254	aceF	NP_001358961.1	32919	322	186	7	296	615	337	630	2.32e-36	147	630	32.919	51.1111
255	aceF	BAG59614.1	34043	282	171	5	336	615	145	413	1.25e-35	142	630	34.043	44.7619
256	aceF	BAG64869.1	31090	312	168	6	339	624	2	292	3.32e-35	137	630	31.09	49.5238
257	aceF	XP_005270602.1	30769	312	169	6	339	624	2	292	1.9e-34	135	630	30.769	49.5238
258	aceF	NP_001358970.1	31627	332	163	8	286	615	222	491	1.87e-33	137	630	31.627	52.6984
259	aceF	NP_001358964.1	31677	322	156	8	296	615	337	596	7.11e-32	134	630	31.677	51.1111
260	aceF	3B8K_A	33761	234	142	4	384	615	2	224	5.33e-31	124	630	33.761	37.1429
261	aceF	1501257A	27768	587	351	16	47	615	69	600	1.05e-30	130	630	27.768	93.1746
262	aceF	XP_011518692.1	26802	444	281	10	217	628	9	440	1.79e-30	127	630	26.802	70.4762
263	aceF	NP_001128496.1	27149	442	282	10	217	628	54	485	2.95e-30	127	630	27.149	70.1587
264	aceF	BAG35370.1	27376	442	281	10	217	628	69	500	5.15e-30	127	630	27.376	70.1587
265	aceF	AAB66315.1	27314	443	280	11	217	628	69	500	1.33e-29	125	630	27.314	70.3175
266	aceF	CAA73606.1	27314	443	280	11	217	628	69	500	1.42e-29	125	630	27.314	70.3175
267	aceF	BAH13054.1	33659	205	135	1	426	630	162	365	1.6e-29	123	630	33.659	32.5397
268	aceF	NP_003468.2	27027	444	280	11	217	628	69	500	2.22e-29	125	630	27.027	70.4762
269	aceF	AAC39661.1	27149	442	282	10	217	628	69	500	3.14e-29	124	630	27.149	70.1587
270	aceF	AAH10389.1	27027	444	280	11	217	628	69	500	3.67e-29	124	630	27.027	70.4762
271	aceF	AAB59629.1	33659	205	135	1	426	630	248	451	4.45e-29	123	630	33.659	32.5397
272	aceF	AAB59629.1	38182	55	34	0	228	282	93	147	0.069	39.3	630	38.182	8.73016
273	aceF	AAB59629.1	36957	46	29	0	24	69	93	138	0.8	35.8	630	36.957	7.30159
274	aceF	AAB59629.1	32727	55	37	0	127	181	93	147	1.8	34.7	630	32.727	8.73016
275	aceF	NP_001924.2	33659	205	135	1	426	630	248	451	5.36e-29	123	630	33.659	32.5397
276	aceF	NP_001924.2	38182	55	34	0	228	282	93	147	0.073	39.3	630	38.182	8.73016
277	aceF	NP_001924.2	36957	46	29	0	24	69	93	138	0.83	35.8	630	36.957	7.30159
278	aceF	NP_001924.2	32727	55	37	0	127	181	93	147	1.9	34.7	630	32.727	8.73016
279	aceF	CAG33008.1	33659	205	135	1	426	630	248	451	8.73e-29	122	630	33.659	32.5397
280	aceF	CAG33008.1	38182	55	34	0	228	282	93	147	0.074	39.3	630	38.182	8.73016
281	aceF	CAG33008.1	32727	55	37	0	127	181	93	147	1.9	34.7	630	32.727	8.73016
282	aceF	BAA05536.1	33659	205	135	1	426	630	248	451	1.18e-28	122	630	33.659	32.5397
283	aceF	BAA05536.1	38182	55	34	0	228	282	93	147	0.074	39.3	630	38.182	8.73016
284	aceF	BAA05536.1	37778	45	28	0	24	68	93	137	0.83	35.8	630	37.778	7.14286
285	aceF	BAA05536.1	32727	55	37	0	127	181	93	147	1.9	34.7	630	32.727	8.73016
286	aceF	BAA03871.1	33171	205	136	1	426	630	248	451	7.02e-28	120	630	33.171	32.5397
287	aceF	BAA03871.1	38182	55	34	0	228	282	93	147	0.061	39.3	630	38.182	8.73016
288	aceF	BAA03871.1	37778	45	28	0	24	68	93	137	0.69	36.2	630	37.778	7.14286
289	aceF	BAA03871.1	32727	55	37	0	127	181	93	147	1.6	34.7	630	32.727	8.73016
290	aceF	AAB50223.1	31933	238	145	4	398	628	147	374	4.03e-27	116	630	31.933	37.7778
291	aceF	AAB31066.1	29956	227	157	2	404	630	225	449	3.37e-25	112	630	29.956	36.0317
292	aceF	AAB31066.1	34545	55	36	0	228	282	92	146	1.1	35.4	630	34.545	8.73016
293	aceF	AAB31066.1	34783	46	30	0	24	69	92	137	7.1	32.7	630	34.783	7.30159
294	aceF	NP_001159630.1	36095	169	97	3	467	628	109	273	5.79e-21	96.3	630	36.095	26.8254
295	aceF	CAD66571.1	34899	149	96	1	426	574	160	307	1.04e-20	96.3	630	34.899	23.6508
296	aceF	CAA32052.1	29752	242	144	5	297	538	2	217	3e-20	92.8	630	29.752	38.4127
297	aceF	BAG62924.1	35503	169	98	3	467	628	109	273	7.11e-20	92.8	630	35.503	26.8254
298	aceF	EAW68159.1	42342	111	62	1	467	577	49	157	5.91e-19	87.8	630	42.342	17.619
299	aceF	AAA59200.1	26460	291	150	9	206	469	59	312	8.49e-14	75.5	630	26.46	46.1905
300	aceF	AAA59200.1	33824	68	43	1	3	68	60	127	0.014	41.2	630	33.824	10.7937
301	aceF	AAA59200.1	36207	58	37	0	114	171	70	127	0.038	39.7	630	36.207	9.20635
302	aceF	CAD62604.1	33708	89	58	1	426	514	164	251	1.04e-07	56.6	630	33.708	14.127
303	aceF	2COO_A	48718	39	20	0	329	367	18	56	5.4e-05	44.3	630	48.718	6.19048
304	aceF	1ZWV_A	51351	37	18	0	329	365	10	46	8.57e-05	43.5	630	51.351	5.87302
305	aceF	3RNM_E	46154	39	21	0	329	367	10	48	0.000438	41.6	630	46.154	6.19048
306	aceF	1K8O_A	35443	79	49	1	206	282	4	82	0.000507	42.4	630	35.443	12.5397
307	aceF	1K8O_A	33824	68	43	1	3	68	5	72	0.013	38.5	630	33.824	10.7937
308	aceF	1K8O_A	33846	65	43	0	114	178	15	79	0.027	37.4	630	33.846	10.3175
309	aceF	NP_001231812.1	37500	56	35	0	228	283	93	148	0.008	40.4	630	37.5	8.88889
310	aceF	NP_001231812.1	32143	56	38	0	24	79	93	148	0.073	37.7	630	32.143	8.88889
311	aceF	NP_001231812.1	32727	55	37	0	127	181	93	147	0.2	36.6	630	32.727	8.73016
312	aceF	CAD66581.1	38182	55	34	0	228	282	76	130	0.039	39.7	630	38.182	8.73016
313	aceF	CAD66581.1	37778	45	28	0	24	68	76	120	0.74	35.4	630	37.778	7.14286
314	aceF	CAD66581.1	32727	55	37	0	127	181	76	130	1.1	35	630	32.727	8.73016
315	aceF	1ZY8_K	23529	153	114	2	217	366	16	168	1.6	34.3	630	23.529	24.2857
316	aceF	2JKU_A	33898	59	39	0	120	178	36	94	3.3	31.6	630	33.898	9.36508
317	aceF	2JKU_A	35593	59	38	0	221	279	36	94	5.4	30.8	630	35.593	9.36508
318	aceF	NP_001339534.1	24432	176	107	4	111	279	554	710	3.7	33.9	630	24.432	27.9365
319	aceF	2EJM_A	30508	59	41	0	120	178	25	83	4.6	31.2	630	30.508	9.36508
320	aceF	2EJM_A	39024	41	25	0	17	57	25	65	9.7	30.4	630	39.024	6.50794
321	aceF	NP_001339540.1	24432	176	107	4	111	279	239	395	5	33.1	630	24.432	27.9365
322	aceF	EAX09032.1	33898	59	39	0	120	178	443	501	7.7	32.7	630	33.898	9.36508
323	aceF	XP_011512899.1	32292	96	57	3	4	95	237	328	8.1	32.7	630	32.292	15.2381
324	aceF	NP_001010903.3	32292	96	57	3	4	95	237	328	8.5	32.7	630	32.292	15.2381
325	aceF	BAG59350.1	33898	59	39	0	120	178	644	702	9.1	32.7	630	33.898	9.36508
326	aceF	NP_001121164.1	33898	59	39	0	120	178	644	702	9.4	32.3	630	33.898	9.36508
327	aceF	NP_001339535.1	33898	59	39	0	120	178	622	680	9.6	32.3	630	33.898	9.36508
328	aceF	NP_001339537.1	33898	59	39	0	120	178	596	654	9.6	32.3	630	33.898	9.36508
329	aceF	NP_000273.2	33898	59	39	0	120	178	670	728	9.6	32.3	630	33.898	9.36508
330	acpP	5XTB_G	44286	70	39	0	4	73	8	77	1.41e-14	64.7	78	44.286	89.7436
331	acpP	2DNW_A	44286	70	39	0	4	73	16	85	2.09e-14	64.7	78	44.286	89.7436
332	acpP	NP_004994.1	44286	70	39	0	4	73	79	148	3.92e-14	65.5	78	44.286	89.7436
333	acpP	AAC05814.1	44286	70	39	0	4	73	84	153	4.37e-14	65.5	78	44.286	89.7436
334	acpP	XP_011544158.2	44286	70	39	0	4	73	110	179	8.46e-14	65.1	78	44.286	89.7436
335	acpP	AAH58920.1	42857	70	40	0	4	73	79	148	6.87e-13	62	78	42.857	89.7436
336	acpP	EAW55815.1	51923	52	25	0	22	73	56	107	9.15e-13	60.8	78	51.923	66.6667
337	acpP	ABO65076.1	41667	48	28	0	4	51	76	123	1.73e-06	45.1	78	41.667	61.5385
338	acpP	EAW89745.1	34694	49	32	0	16	64	2135	2183	0.26	31.6	78	34.694	62.8205
339	acpP	AAH63242.1	34694	49	32	0	16	64	2135	2183	0.28	31.6	78	34.694	62.8205
340	acpP	NP_004095.4	34694	49	32	0	16	64	2135	2183	0.28	31.6	78	34.694	62.8205
341	acpP	AAA73576.1	34694	49	32	0	16	64	2133	2181	0.28	31.6	78	34.694	62.8205
342	acpP	AAS09886.1	34694	49	32	0	16	64	2135	2183	0.28	31.6	78	34.694	62.8205
343	acpP	AAH07267.1	34694	49	32	0	16	64	554	602	0.41	31.2	78	34.694	62.8205
344	acpP	CAB53710.1	45098	51	24	3	30	78	459	507	0.43	31.2	78	45.098	65.3846
345	acpP	3FB2_A	45098	51	24	3	30	78	144	192	0.44	30.8	78	45.098	65.3846
346	acpP	EAW87805.1	45098	51	24	3	30	78	119	167	0.45	31.2	78	45.098	65.3846
347	acpP	XP_006717313.1	45098	51	24	3	30	78	1482	1530	0.5	30.8	78	45.098	65.3846
348	acpP	XP_006717313.1	47222	36	17	2	31	66	505	538	2.6	28.9	78	47.222	46.1538
349	acpP	XP_006717309.1	45098	51	24	3	30	78	1482	1530	0.5	30.8	78	45.098	65.3846
350	acpP	XP_006717309.1	47222	36	17	2	31	66	505	538	2.6	28.9	78	47.222	46.1538
351	acpP	XP_006717315.1	45098	51	24	3	30	78	1462	1510	0.51	30.8	78	45.098	65.3846
352	acpP	XP_006717315.1	47222	36	17	2	31	66	505	538	2.6	28.9	78	47.222	46.1538
353	acpP	EAW87812.1	45098	51	24	3	30	78	1470	1518	0.51	30.8	78	45.098	65.3846
354	acpP	EAW87812.1	47222	36	17	2	31	66	493	526	2.6	28.9	78	47.222	46.1538
355	acpP	NP_003118.2	45098	51	24	3	30	78	1470	1518	0.51	30.8	78	45.098	65.3846
356	acpP	NP_003118.2	47222	36	17	2	31	66	493	526	2.6	28.9	78	47.222	46.1538
357	acpP	EAW87809.1	45098	51	24	3	30	78	1425	1473	0.52	30.8	78	45.098	65.3846
358	acpP	EAW87809.1	47222	36	17	2	31	66	493	526	2.5	28.9	78	47.222	46.1538
359	acpP	XP_006717312.1	45098	51	24	3	30	78	1482	1530	0.52	30.8	78	45.098	65.3846
360	acpP	XP_006717312.1	47222	36	17	2	31	66	505	538	2.7	28.9	78	47.222	46.1538
361	acpP	XP_006717311.1	45098	51	24	3	30	78	1482	1530	0.52	30.8	78	45.098	65.3846
362	acpP	XP_006717311.1	47222	36	17	2	31	66	505	538	2.6	28.9	78	47.222	46.1538
363	acpP	AAA51702.1	45098	51	24	3	30	78	795	843	0.52	30.8	78	45.098	65.3846
364	acpP	EAW87807.1	45098	51	24	3	30	78	1425	1473	0.52	30.8	78	45.098	65.3846
365	acpP	EAW87807.1	47222	36	17	2	31	66	493	526	2.6	28.9	78	47.222	46.1538
366	acpP	XP_006717316.1	45098	51	24	3	30	78	1462	1510	0.52	30.8	78	45.098	65.3846
367	acpP	XP_006717316.1	47222	36	17	2	31	66	505	538	2.6	28.9	78	47.222	46.1538
368	acpP	EAW87808.1	45098	51	24	3	30	78	1470	1518	0.52	30.8	78	45.098	65.3846
369	acpP	EAW87808.1	47222	36	17	2	31	66	493	526	2.7	28.9	78	47.222	46.1538
370	acpP	EAW87810.1	45098	51	24	3	30	78	1478	1526	0.52	30.8	78	45.098	65.3846
371	acpP	EAW87810.1	47222	36	17	2	31	66	493	526	2.7	28.9	78	47.222	46.1538
372	acpP	XP_006717308.1	45098	51	24	3	30	78	1482	1530	0.53	30.8	78	45.098	65.3846
373	acpP	XP_006717308.1	47222	36	17	2	31	66	505	538	2.6	28.9	78	47.222	46.1538
374	acpP	XP_016870549.1	45098	51	24	3	30	78	1462	1510	0.53	30.8	78	45.098	65.3846
375	acpP	XP_016870549.1	47222	36	17	2	31	66	505	538	2.6	28.9	78	47.222	46.1538
376	acpP	XP_016870548.1	45098	51	24	3	30	78	1470	1518	0.53	30.8	78	45.098	65.3846
377	acpP	XP_016870548.1	47222	36	17	2	31	66	493	526	2.6	28.9	78	47.222	46.1538
378	acpP	AAA51790.1	45098	51	24	3	30	78	1470	1518	0.53	30.8	78	45.098	65.3846
379	acpP	NP_001350688.1	45098	51	24	3	30	78	1470	1518	0.53	30.8	78	45.098	65.3846
380	acpP	NP_001350688.1	47222	36	17	2	31	66	493	526	2.7	28.9	78	47.222	46.1538
381	acpP	AAB60364.1	45098	51	24	3	30	78	660	708	0.54	30.8	78	45.098	65.3846
382	acpP	AAB41498.1	45098	51	24	3	30	78	1470	1518	0.54	30.8	78	45.098	65.3846
383	acpP	AAB41498.1	47222	36	17	2	31	66	493	526	2.7	28.9	78	47.222	46.1538
384	acpP	NP_001123910.1	45098	51	24	3	30	78	1470	1518	0.54	30.8	78	45.098	65.3846
385	acpP	NP_001123910.1	47222	36	17	2	31	66	493	526	2.7	28.9	78	47.222	46.1538
386	acpP	XP_006717310.1	45098	51	24	3	30	78	1462	1510	0.54	30.8	78	45.098	65.3846
387	acpP	XP_006717310.1	47222	36	17	2	31	66	505	538	2.7	28.9	78	47.222	46.1538
388	acpP	NP_001182461.1	45098	51	24	3	30	78	1450	1498	0.55	30.8	78	45.098	65.3846
389	acpP	NP_001182461.1	47222	36	17	2	31	66	493	526	2.7	28.9	78	47.222	46.1538
390	acpP	EAW87811.1	45098	51	24	3	30	78	1450	1498	0.55	30.8	78	45.098	65.3846
391	acpP	EAW87811.1	47222	36	17	2	31	66	493	526	2.7	28.9	78	47.222	46.1538
392	acpP	NP_001350694.1	45098	51	24	3	30	78	1450	1498	0.55	30.8	78	45.098	65.3846
393	acpP	NP_001350694.1	47222	36	17	2	31	66	493	526	2.7	28.9	78	47.222	46.1538
394	acpP	BAD93097.1	45098	51	24	3	30	78	1504	1552	0.56	30.8	78	45.098	65.3846
395	acpP	BAD93097.1	47222	36	17	2	31	66	527	560	2.9	28.9	78	47.222	46.1538
396	acpP	XP_006717314.1	45098	51	24	3	30	78	1450	1498	0.57	30.8	78	45.098	65.3846
397	acpP	XP_006717314.1	47222	36	17	2	31	66	493	526	2.7	28.9	78	47.222	46.1538
398	acpP	EAW87806.1	45098	51	24	3	30	78	1470	1518	0.63	30.8	78	45.098	65.3846
399	acpP	EAW87806.1	47222	36	17	2	31	66	493	526	3	28.9	78	47.222	46.1538
400	acpP	AAB35516.1	34694	49	32	0	16	64	92	140	0.68	30.4	78	34.694	62.8205
401	acpP	AAH07909.1	34694	49	32	0	16	64	63	111	0.81	30.4	78	34.694	62.8205
402	acpP	2CG5_B	32653	49	33	0	16	64	19	67	2	28.5	78	32.653	62.8205
403	acpP	BAG62120.1	47222	36	17	2	31	66	493	526	2.9	28.9	78	47.222	46.1538
404	acpP	BAG57892.1	47222	36	17	2	31	66	493	526	3.1	28.9	78	47.222	46.1538
405	acpP	EAW80439.1	39216	51	29	1	23	71	214	264	3.5	28.5	78	39.216	65.3846
406	acpP	DAA01055.1	38710	31	19	0	47	77	109	139	4.2	28.1	78	38.71	39.7436
407	acpP	NP_982260.2	39286	28	17	0	47	74	96	123	4.2	28.1	78	39.286	35.8974
408	acpP	Q6XD76.1	39286	28	17	0	47	74	95	122	4.3	28.1	78	39.286	35.8974
409	acpS	NP_001436.1	24242	66	41	2	1	65	19	76	9.5	28.1	126	24.242	52.381
410	acpS	1O1U_A	24242	66	41	2	1	65	18	75	9.5	28.1	126	24.242	52.381
411	acpS	2MM3_A	24242	66	41	2	1	65	18	75	9.8	28.1	126	24.242	52.381
412	acpS	EAW61565.1	24242	66	41	2	1	65	19	76	9.9	28.1	126	24.242	52.381
413	adk	NP_037543.1	53723	188	83	1	1	184	16	203	1.72e-67	209	214	53.723	87.8505
414	adk	NP_001306070.1	53723	188	83	1	1	184	16	203	1.84e-67	209	214	53.723	87.8505
415	adk	2C9Y_A	53723	188	83	1	1	184	17	204	2.87e-67	209	214	53.723	87.8505
416	adk	NP_001616.1	53723	188	83	1	1	184	16	203	3.11e-67	209	214	53.723	87.8505
417	adk	NP_001186128.1	51596	188	79	2	1	184	16	195	1.41e-61	194	214	51.596	87.8505
418	adk	AAL87027.1	54321	162	70	1	1	158	16	177	3.98e-57	182	214	54.321	75.7009
419	adk	NP_001306068.1	54194	155	67	1	34	184	1	155	7.41e-54	173	214	54.194	72.4299
420	adk	NP_001306069.1	54194	155	67	1	34	184	1	155	1.33e-53	172	214	54.194	72.4299
421	adk	EAX07485.1	54605	152	65	1	1	148	16	167	1.74e-53	171	214	54.605	71.028
422	adk	NP_057366.2	43915	189	96	3	1	185	8	190	1.08e-49	164	214	43.915	88.3178
423	adk	AAP97224.1	43915	189	96	3	1	185	8	190	1.25e-49	163	214	43.915	88.3178
424	adk	BAA87913.1	43386	189	97	3	1	185	8	190	1.83e-48	160	214	43.386	88.3178
425	adk	AAP97143.1	44565	184	92	3	6	185	1	178	5.52e-48	159	214	44.565	85.9813
426	adk	AAH40224.1	41304	184	102	3	1	182	6	185	8.02e-45	151	214	41.304	85.9813
427	adk	NP_037542.1	41304	184	102	3	1	182	6	185	1.13e-44	150	214	41.304	85.9813
428	adk	2AR7_A	41304	184	102	3	1	182	28	207	1.87e-44	150	214	41.304	85.9813
429	adk	EAW88550.1	41304	184	102	3	1	182	6	185	2.01e-44	150	214	41.304	85.9813
430	adk	AAH66944.1	40761	184	103	3	1	182	6	185	5.33e-44	149	214	40.761	85.9813
431	adk	3NDP_A	40761	184	103	3	1	182	6	185	1.57e-43	148	214	40.761	85.9813
432	adk	AAL87028.1	55118	127	53	1	34	156	1	127	6.07e-43	143	214	55.118	59.3458
433	adk	NP_001306071.1	40957	188	65	2	1	184	16	161	3.76e-42	143	214	40.957	87.8505
434	adk	EAW88549.1	38043	184	91	3	1	182	6	168	2.14e-37	131	214	38.043	85.9813
435	adk	NP_001186781.1	36216	185	76	2	1	185	8	150	3.42e-34	122	214	36.216	86.4486
436	adk	BAG60470.1	36216	185	76	2	1	185	8	150	3.77e-34	122	214	36.216	86.4486
437	adk	BAG59564.1	57292	96	41	0	1	96	16	111	1.33e-33	119	214	57.292	44.8598
438	adk	NP_001306072.1	58511	94	39	0	1	94	16	109	1.75e-33	119	214	58.511	43.9252
439	adk	NP_001186782.1	47899	119	57	2	71	185	3	120	4.38e-32	116	214	47.899	55.6075
440	adk	BAG54101.1	47059	119	58	2	71	185	3	120	2.14e-31	114	214	47.059	55.6075
441	adk	NP_000467.1	34973	183	91	3	3	184	11	166	4.31e-29	110	214	34.973	85.514
442	adk	AAH01116.1	34973	183	91	3	3	184	11	166	4.4e-29	110	214	34.973	85.514
443	adk	1Z83_A	34973	183	91	3	3	184	12	167	5.21e-29	109	214	34.973	85.514
444	adk	NP_001305051.1	34973	183	91	3	3	184	27	182	8.42e-29	109	214	34.973	85.514
445	adk	BAD97221.1	34973	183	91	3	3	184	11	166	9.41e-29	108	214	34.973	85.514
446	adk	EAW87706.1	34973	183	91	3	3	184	66	221	3.35e-28	108	214	34.973	85.514
447	adk	XP_024303207.1	35196	179	88	3	7	184	8	159	5.01e-28	107	214	35.196	83.6449
448	adk	NP_001317545.1	41912	136	73	3	49	182	2	133	1.05e-27	105	214	41.912	63.5514
449	adk	EAX00475.1	48352	91	47	0	94	184	4	94	3.62e-24	95.1	214	48.352	42.5234
450	adk	NP_001353064.1	31963	219	109	7	3	213	6	192	1.92e-23	95.5	214	31.963	102.336
451	adk	AAH14961.1	31963	219	109	7	3	213	38	224	4.17e-23	95.1	214	31.963	102.336
452	adk	NP_057392.1	31963	219	109	7	3	213	38	224	4.3e-23	95.1	214	31.963	102.336
453	adk	AAD27956.1	31383	188	97	4	3	187	14	172	2.28e-22	92.4	214	31.383	87.8505
454	adk	NP_001304887.1	29121	182	124	3	2	182	66	243	3.16e-22	94	214	29.121	85.0467
455	adk	XP_011516579.1	29189	185	121	4	2	184	71	247	4.92e-22	95.1	214	29.189	86.4486
456	adk	XP_011516579.1	34783	46	30	0	2	47	282	327	0.02	38.5	214	34.783	21.4953
457	adk	NP_001304888.1	29121	182	124	3	2	182	98	275	5.28e-22	94	214	29.121	85.0467
458	adk	EAW88017.1	29189	185	121	4	2	184	30	206	1.32e-21	94.4	214	29.189	86.4486
459	adk	EAW88017.1	25389	193	111	6	2	182	241	412	2.44e-07	53.1	214	25.389	90.1869
460	adk	XP_006717028.1	29121	182	124	3	2	182	198	375	1.54e-21	94	214	29.121	85.0467
461	adk	XP_006717028.1	31250	144	92	3	43	184	25	163	1.92e-16	79.7	214	31.25	67.2897
462	adk	NP_001358700.1	29189	185	121	4	2	184	30	206	1.56e-21	94.4	214	29.189	86.4486
463	adk	NP_001358700.1	29121	182	124	3	2	182	241	418	2.82e-21	93.6	214	29.121	85.0467
464	adk	XP_011516580.1	29121	182	124	3	2	182	196	373	1.61e-21	94	214	29.121	85.0467
465	adk	XP_011516580.1	31250	144	92	3	43	184	23	161	2.01e-16	79.7	214	31.25	67.2897
466	adk	XP_005272226.1	29189	185	121	4	2	184	71	247	1.63e-21	94.4	214	29.189	86.4486
467	adk	XP_005272226.1	29121	182	124	3	2	182	282	459	3.43e-21	93.6	214	29.121	85.0467
468	adk	NP_689785.1	29189	185	121	4	2	184	59	235	1.69e-21	94.4	214	29.189	86.4486
469	adk	NP_689785.1	29121	182	124	3	2	182	270	447	3.29e-21	93.6	214	29.121	85.0467
470	adk	2BWJ_A	30851	188	98	4	3	187	15	173	1.99e-21	90.1	214	30.851	87.8505
471	adk	NP_001358701.1	29121	182	124	3	2	182	225	402	2.32e-21	93.6	214	29.121	85.0467
472	adk	NP_001358701.1	31250	144	92	3	43	184	52	190	2.67e-16	79.3	214	31.25	67.2897
473	adk	AAH12467.2	31383	188	97	4	3	187	145	303	2.83e-21	92.4	214	31.383	87.8505
474	adk	EAX06543.1	37500	136	62	3	49	182	2	116	4.71e-21	87.8	214	37.5	63.5514
475	adk	EAX06377.1	31088	193	101	4	3	192	379	542	5.8e-21	93.2	214	31.088	90.1869
476	adk	EAX06377.1	27568	185	105	2	3	185	135	292	9.45e-17	80.9	214	27.568	86.4486
477	adk	XP_016856499.1	31383	188	97	4	3	187	329	487	7.17e-21	92.8	214	31.383	87.8505
478	adk	XP_016856499.1	27568	185	105	2	3	185	85	242	1.01e-16	80.9	214	27.568	86.4486
479	adk	AAO16520.2	31383	188	97	4	3	187	353	511	7.84e-21	92.8	214	31.383	87.8505
480	adk	AAO16520.2	27568	185	105	2	3	185	109	266	9.54e-17	80.9	214	27.568	86.4486
481	adk	NP_036225.2	31383	188	97	4	3	187	353	511	8.3e-21	92.4	214	31.383	87.8505
482	adk	NP_036225.2	27568	185	105	2	3	185	109	266	1e-16	80.9	214	27.568	86.4486
483	adk	AAP97322.1	31383	188	97	4	3	187	379	537	8.48e-21	92.8	214	31.383	87.8505
484	adk	AAP97322.1	27568	185	105	2	3	185	135	292	9.56e-17	80.9	214	27.568	86.4486
485	adk	NP_777283.1	31383	188	97	4	3	187	379	537	8.55e-21	92.4	214	31.383	87.8505
486	adk	NP_777283.1	27568	185	105	2	3	185	135	292	9.74e-17	80.9	214	27.568	86.4486
487	adk	AAH36666.1	31383	188	97	4	3	187	379	537	8.8e-21	92.4	214	31.383	87.8505
488	adk	AAH36666.1	27568	185	105	2	3	185	135	292	1.04e-16	80.9	214	27.568	86.4486
489	adk	XP_005270796.1	31383	188	97	4	3	187	355	513	9.18e-21	92.4	214	31.383	87.8505
490	adk	XP_005270796.1	27568	185	105	2	3	185	111	268	1.31e-16	80.5	214	27.568	86.4486
491	adk	AAH33896.1	30851	188	98	4	3	187	353	511	1.41e-19	89	214	30.851	87.8505
492	adk	AAH33896.1	27568	185	105	2	3	185	109	266	1.05e-16	80.9	214	27.568	86.4486
493	adk	EAW98499.1	44444	90	49	1	82	171	1	89	5.29e-19	82.4	214	44.444	42.0561
494	adk	XP_016856501.1	27568	185	105	2	3	185	135	292	6.52e-17	80.9	214	27.568	86.4486
495	adk	EAX06378.1	27568	185	105	2	3	185	135	292	7.53e-17	80.9	214	27.568	86.4486
496	adk	EAX06378.1	48077	52	27	0	3	54	380	431	9.93e-09	57.4	214	48.077	24.2991
497	adk	EAX00477.1	50000	72	36	0	1	72	16	87	8.93e-17	75.5	214	50	33.6449
498	adk	EAX06870.1	36667	120	68	3	3	114	6	125	1.01e-15	73.6	214	36.667	56.0748
499	adk	EAX00476.1	50000	72	36	0	1	72	16	87	3.08e-15	75.9	214	50	33.6449
500	adk	BAG57577.1	36667	120	68	3	3	114	38	157	1.09e-14	71.6	214	36.667	56.0748
501	adk	BAG56775.1	41304	92	49	2	3	89	38	129	1.99e-13	68.6	214	41.304	42.9907
502	adk	BAC03558.1	38710	93	55	1	3	93	111	203	5.74e-13	68.6	214	38.71	43.4579
503	adk	EAW48335.1	25166	151	104	3	3	144	105	255	8.95e-13	68.6	214	25.166	70.5607
504	adk	BAB70945.1	25899	139	95	2	3	133	33	171	1.79e-12	68.2	214	25.899	64.9533
505	adk	NP_659462.1	25899	139	95	2	3	133	33	171	1.86e-12	68.2	214	25.899	64.9533
506	adk	NP_001316532.1	25899	139	95	2	3	133	105	243	1.95e-12	68.2	214	25.899	64.9533
507	adk	XP_016865875.1	25899	139	95	2	3	133	105	243	1.99e-12	68.6	214	25.899	64.9533
508	adk	XP_016865875.1	25521	192	126	6	1	184	1484	1666	1.65e-07	53.9	214	25.521	89.7196
509	adk	XP_016865875.1	24138	174	83	4	1	125	1064	1237	0.42	34.7	214	24.138	81.3084
510	adk	XP_011533861.1	25899	139	95	2	3	133	105	243	2.03e-12	68.6	214	25.899	64.9533
511	adk	EAW48334.1	25166	151	104	3	3	144	33	183	2.08e-12	68.6	214	25.166	70.5607
512	adk	XP_011533857.1	25899	139	95	2	3	133	105	243	2.33e-12	68.6	214	25.899	64.9533
513	adk	XP_011533857.1	28090	89	57	2	1	82	1484	1572	0.12	36.2	214	28.09	41.5888
514	adk	XP_011533857.1	30769	65	44	1	62	125	1173	1237	0.41	34.7	214	30.769	30.3738
515	adk	XP_016865877.1	25899	139	95	2	3	133	105	243	2.42e-12	68.2	214	25.899	64.9533
516	adk	XP_016865877.1	24138	174	83	4	1	125	1064	1237	0.43	34.7	214	24.138	81.3084
517	adk	XP_011533858.1	25899	139	95	2	3	133	105	243	2.53e-12	68.2	214	25.899	64.9533
518	adk	XP_011533858.1	30769	65	44	1	62	125	1173	1237	0.48	34.7	214	30.769	30.3738
519	adk	XP_016882294.1	34091	88	58	0	6	93	1	88	2.32e-11	61.2	214	34.091	41.1215
520	adk	XP_016882293.1	33708	89	59	0	5	93	44	132	3.99e-11	61.6	214	33.708	41.5888
521	adk	XP_011533852.1	25503	149	102	3	4	143	106	254	2.19e-10	62.8	214	25.503	69.6262
522	adk	XP_011533852.1	25521	192	126	6	1	184	1484	1666	1.69e-05	48.1	214	25.521	89.7196
523	adk	XP_011533852.1	32787	61	40	1	62	121	1173	1233	0.98	33.5	214	32.787	28.5047
524	adk	XP_006715439.2	25503	149	102	3	4	143	106	254	2.23e-10	62.4	214	25.503	69.6262
525	adk	XP_006715439.2	26203	187	126	5	1	184	1484	1661	1.46e-07	54.3	214	26.203	87.3832
526	adk	XP_006715439.2	32787	61	40	1	62	121	1173	1233	1	33.5	214	32.787	28.5047
527	adk	XP_011533854.1	25503	149	102	3	4	143	34	182	2.36e-10	62.4	214	25.503	69.6262
528	adk	XP_011533854.1	25521	192	126	6	1	184	1412	1594	1.96e-05	47.8	214	25.521	89.7196
529	adk	XP_011533854.1	32787	61	40	1	62	121	1101	1161	1	33.5	214	32.787	28.5047
530	adk	XP_016865873.1	26087	138	94	2	4	133	106	243	2.57e-10	62.4	214	26.087	64.486
531	adk	XP_016865873.1	25521	192	126	6	1	184	1484	1666	2.05e-05	47.8	214	25.521	89.7196
532	adk	XP_016865873.1	32787	61	40	1	62	121	1173	1233	1	33.5	214	32.787	28.5047
533	adk	XP_011533856.1	26087	138	94	2	4	133	106	243	2.59e-10	62.4	214	26.087	64.486
534	adk	XP_011533856.1	25521	192	126	6	1	184	1377	1559	2.03e-05	47.8	214	25.521	89.7196
535	adk	XP_011533856.1	32787	61	40	1	62	121	1066	1126	1	33.5	214	32.787	28.5047
536	adk	NP_001138600.2	26087	138	94	2	4	133	34	171	2.93e-10	62.4	214	26.087	64.486
537	adk	NP_001138600.2	26203	187	126	5	1	184	1412	1589	2.14e-07	53.9	214	26.203	87.3832
538	adk	NP_001138600.2	32787	61	40	1	62	121	1101	1161	1.2	33.5	214	32.787	28.5047
539	adk	XP_024303208.1	28571	133	67	3	53	184	1	106	1.23e-08	54.3	214	28.571	62.1495
540	adk	NP_001129612.1	25701	214	80	7	3	213	38	175	1.64e-08	55.1	214	25.701	100
541	adk	BAG60709.1	25701	214	80	7	3	213	38	175	1.85e-08	55.1	214	25.701	100
542	adk	EAW48336.1	26203	187	126	5	1	184	418	595	1.45e-07	54.3	214	26.203	87.3832
543	adk	EAW48336.1	32787	61	40	1	62	121	180	240	0.86	33.5	214	32.787	28.5047
544	adk	XP_016865876.1	25521	192	126	6	1	184	1030	1212	2.28e-07	53.5	214	25.521	89.7196
545	adk	XP_016865876.1	30769	65	44	1	62	125	719	783	0.38	34.7	214	30.769	30.3738
546	adk	NP_001337819.1	25490	153	77	5	1	122	368	514	9.56e-07	51.6	214	25.49	71.4953
547	adk	NP_001337817.1	25490	153	77	5	1	122	368	514	1.29e-06	51.2	214	25.49	71.4953
548	adk	NP_001308530.1	37037	54	34	0	6	59	1	54	1.61e-05	45.4	214	37.037	25.2336
549	adk	XP_011533860.1	25521	192	126	6	1	184	688	870	1.67e-05	48.1	214	25.521	89.7196
550	adk	XP_011533860.1	32787	61	40	1	62	121	377	437	1	33.5	214	32.787	28.5047
551	adk	XP_016865878.1	25521	192	126	6	1	184	829	1011	1.67e-05	48.1	214	25.521	89.7196
552	adk	XP_016865878.1	32787	61	40	1	62	121	518	578	1	33.5	214	32.787	28.5047
553	adk	XP_016865874.1	25521	192	126	6	1	184	1197	1379	2.45e-05	47.8	214	25.521	89.7196
554	adk	XP_016865874.1	32787	61	40	1	62	121	886	946	1.2	33.5	214	32.787	28.5047
555	adk	EAX06539.1	39535	43	26	0	1	43	6	48	5.63e-05	43.9	214	39.535	20.0935
556	adk	BAB71480.1	27419	124	58	5	1	93	368	490	5.73e-05	46.2	214	27.419	57.9439
557	adk	EAW81639.1	27419	124	58	4	1	93	368	490	7e-05	46.2	214	27.419	57.9439
558	adk	EAW81636.1	27419	124	58	4	1	93	368	490	7.02e-05	46.2	214	27.419	57.9439
559	adk	NP_001337820.1	27419	124	58	4	1	93	342	464	7.57e-05	45.8	214	27.419	57.9439
560	adk	NP_689540.2	27419	124	58	4	1	93	368	490	7.77e-05	45.8	214	27.419	57.9439
561	adk	XP_006720085.1	27419	124	58	4	1	93	342	464	8.32e-05	45.8	214	27.419	57.9439
562	adk	EAW87708.1	27049	122	61	3	53	173	1	95	9.22e-05	42.7	214	27.049	57.0093
563	adk	XP_006720084.1	27419	124	58	4	1	93	368	490	9.71e-05	45.8	214	27.419	57.9439
564	adk	XP_011512441.1	29825	57	40	0	43	99	684	740	0.059	37.4	214	29.825	26.6355
565	adk	XP_011512440.1	29825	57	40	0	43	99	684	740	0.059	37.4	214	29.825	26.6355
566	adk	XP_011512437.1	29825	57	40	0	43	99	684	740	0.062	37.4	214	29.825	26.6355
567	adk	XP_016865369.1	29825	57	40	0	43	99	622	678	0.062	37.4	214	29.825	26.6355
568	adk	XP_011512439.1	29825	57	40	0	43	99	679	735	0.062	37.4	214	29.825	26.6355
569	adk	XP_011512442.1	29825	57	40	0	43	99	627	683	0.063	37.4	214	29.825	26.6355
570	adk	XP_011512438.1	29825	57	40	0	43	99	684	740	0.063	37.4	214	29.825	26.6355
571	adk	BAB21861.1	29825	57	40	0	43	99	168	224	0.065	37	214	29.825	26.6355
572	adk	XP_011512443.1	29825	57	40	0	43	99	542	598	0.065	37.4	214	29.825	26.6355
573	adk	XP_005248433.1	29825	57	40	0	43	99	684	740	0.068	37	214	29.825	26.6355
574	adk	XP_005248434.1	29825	57	40	0	43	99	679	735	0.069	37	214	29.825	26.6355
575	adk	XP_005248435.1	29825	57	40	0	43	99	684	740	0.078	37	214	29.825	26.6355
576	adk	XP_016865371.1	29825	57	40	0	43	99	684	740	0.08	37	214	29.825	26.6355
577	adk	XP_024301987.1	29825	57	40	0	43	99	627	683	0.081	37	214	29.825	26.6355
578	adk	NP_079143.3	29825	57	40	0	43	99	684	740	0.082	37	214	29.825	26.6355
579	adk	BAD18424.1	24138	174	83	4	1	125	71	244	0.28	35	214	24.138	81.3084
580	adk	AAH87860.1	32787	61	40	1	62	121	35	95	0.42	33.9	214	32.787	28.5047
581	adk	XP_011521450.1	28736	87	47	3	8	86	2191	2270	0.66	34.3	214	28.736	40.6542
582	adk	XP_016878835.1	28736	87	47	3	8	86	2197	2276	0.66	34.3	214	28.736	40.6542
583	adk	XP_011521449.1	28736	87	47	3	8	86	2208	2287	0.66	34.3	214	28.736	40.6542
584	adk	XP_011521448.1	28736	87	47	3	8	86	2218	2297	0.69	33.9	214	28.736	40.6542
585	adk	XP_011521454.1	28736	87	47	3	8	86	111	190	0.69	33.9	214	28.736	40.6542
586	adk	NP_001257903.1	28736	87	47	3	8	86	2157	2236	0.7	33.9	214	28.736	40.6542
587	adk	XP_006721269.1	28736	87	47	3	8	86	2174	2253	0.7	33.9	214	28.736	40.6542
588	adk	XP_011521453.1	28736	87	47	3	8	86	2184	2263	0.7	33.9	214	28.736	40.6542
589	adk	XP_016878836.1	28736	87	47	3	8	86	1561	1640	0.75	33.9	214	28.736	40.6542
590	adk	EAW88015.1	27273	77	52	2	106	182	258	330	0.97	33.1	214	27.273	35.9813
591	adk	NP_057367.1	40000	35	21	0	2	36	5	39	2	31.6	214	40	16.3551
592	adk	1RKB_A	40000	35	21	0	2	36	6	40	2.1	31.6	214	40	16.3551
593	adk	3IIJ_A	40000	35	21	0	2	36	13	47	2.6	31.6	214	40	16.3551
594	adk	BAC03851.1	28333	60	37	1	28	81	462	521	3	32	214	28.333	28.0374
595	adk	5YBV_B	34545	55	33	2	153	204	59	113	3.3	31.6	214	34.545	25.7009
596	adk	5YBV_A	34545	55	33	2	153	204	56	110	3.5	31.2	214	34.545	25.7009
597	adk	AAH09982.2	28333	60	37	1	28	81	473	532	3.7	31.6	214	28.333	28.0374
598	adk	CAD39169.1	28333	60	37	1	28	81	631	690	3.7	31.6	214	28.333	28.0374
599	adk	4HBD_A	34545	55	33	2	153	204	74	128	3.8	31.2	214	34.545	25.7009
600	adk	5JZV_A	40000	35	21	0	2	36	39	73	3.9	31.2	214	40	16.3551
601	adk	AAI05988.1	28333	60	37	1	28	81	293	352	4.1	31.6	214	28.333	28.0374
602	adk	EAW64712.1	27586	58	38	1	28	85	349	402	4.4	31.2	214	27.586	27.1028
603	adk	AAH35132.1	48387	31	16	0	3	33	58	88	9.4	30.4	214	48.387	14.486
604	adk	NP_079114.3	48387	31	16	0	3	33	58	88	9.4	30.4	214	48.387	14.486
605	alaS	NP_001596.2	38611	979	473	28	4	875	6	963	0	566	876	38.611	111.758
606	alaS	BAD96544.1	38611	979	473	28	4	875	6	963	0	566	876	38.611	111.758
607	alaS	BAA06808.1	38509	979	474	28	4	875	6	963	0	564	876	38.509	111.758
608	alaS	BAG61157.1	37851	996	481	26	4	875	6	987	0	562	876	37.851	113.699
609	alaS	AAI31729.1	35337	965	498	30	12	875	46	985	2.33e-155	483	876	35.337	110.16
610	alaS	NP_065796.2	35233	965	499	30	12	875	46	985	3.2e-155	483	876	35.233	110.16
611	alaS	XP_011513066.1	35746	912	461	29	12	822	46	933	1.45e-152	475	876	35.746	104.11
612	alaS	5KNN_A	47210	466	198	13	4	440	3	449	3.96e-128	395	876	47.21	53.1963
613	alaS	4XEM_A	47210	466	198	13	4	440	26	472	5.58e-128	395	876	47.21	53.1963
614	alaS	4XEO_A	46996	466	199	13	4	440	26	472	3.85e-127	393	876	46.996	53.1963
615	alaS	AAH33169.1	32997	794	431	22	168	875	7	785	3.79e-100	332	876	32.997	90.6393
616	alaS	XP_005249302.1	47768	224	82	10	12	220	46	249	3.05e-58	218	876	47.768	25.5708
617	alaS	XP_005249302.1	29338	634	368	19	317	875	260	888	2.19e-45	179	876	29.338	72.3744
618	alaS	XP_016866601.1	28986	552	316	16	395	875	9	555	3.18e-36	147	876	28.986	63.0137
619	alaS	AAH13593.1	28986	552	316	16	395	875	5	551	3.32e-36	147	876	28.986	63.0137
620	alaS	EAW51840.1	58140	43	18	0	4	46	6	48	7.13e-10	58.9	876	58.14	4.90868
621	alaS	NP_001129514.2	22704	392	269	11	491	874	217	582	2.6e-09	63.9	876	22.704	44.7489
622	alaS	BAG52811.1	23350	394	264	13	491	874	174	539	3.57e-09	63.5	876	23.35	44.9772
623	alaS	NP_079543.1	23350	394	264	13	491	874	156	521	5.33e-09	62.8	876	23.35	44.9772
624	alaS	NP_001248363.1	22704	392	269	11	491	874	43	408	1.64e-08	60.8	876	22.704	44.7489
625	alaS	EAW60906.1	23183	289	202	8	491	774	217	490	2.71e-07	57.4	876	23.183	32.9909
626	alaS	AAI43944.1	24427	131	91	4	564	688	234	362	0.31	38.1	876	24.427	14.9543
627	alaS	EAW51838.1	27919	197	105	8	681	864	4	176	0.34	36.6	876	27.919	22.4886
628	alaS	XP_006720449.1	24427	131	91	4	564	688	234	362	0.35	37.7	876	24.427	14.9543
629	alaS	NP_689547.2	24427	131	91	4	564	688	234	362	0.37	37.7	876	24.427	14.9543
630	alaS	XP_016877401.1	24427	131	91	4	564	688	234	362	0.42	37.4	876	24.427	14.9543
631	alaS	5T5S_A	27919	197	105	8	681	864	30	202	0.57	36.2	876	27.919	22.4886
632	alaS	AAH22229.1	29213	89	61	1	711	797	22	110	2.5	34.3	876	29.213	10.1598
633	alaS	AAH92467.1	29412	102	63	3	325	418	136	236	5.3	33.5	876	29.412	11.6438
634	alaS	AAK91763.1	30526	95	56	4	414	506	11	97	5.7	32	876	30.526	10.8447
635	alaS	XP_016876162.1	29412	102	63	3	325	418	136	236	8.6	33.1	876	29.412	11.6438
636	alaS	AAG21074.1	29412	102	63	3	325	418	136	236	8.7	33.1	876	29.412	11.6438
637	alaS	AAI13112.1	29412	102	63	3	325	418	136	236	8.8	33.1	876	29.412	11.6438
638	alaS	NP_003753.2	33333	63	40	1	334	396	38	98	8.8	31.6	876	33.333	7.19178
639	alaS	NP_060921.3	29412	102	63	3	325	418	136	236	8.9	33.1	876	29.412	11.6438
640	alaS	NP_001172056.1	31746	63	41	1	334	396	37	97	8.9	31.6	876	31.746	7.19178
641	alaS	XP_011533451.1	29412	102	63	3	325	418	136	236	9	33.1	876	29.412	11.6438
642	alaS	BAF85095.1	29412	102	63	3	325	418	136	236	9.2	33.1	876	29.412	11.6438
643	alaS	XP_011533452.1	29213	89	55	2	325	405	136	224	9.3	33.1	876	29.213	10.1598
644	alaS	NP_659475.2	27481	131	85	7	54	180	323	447	9.4	33.1	876	27.481	14.9543
645	alaS	CAI46195.1	29412	102	63	3	325	418	136	236	10	33.1	876	29.412	11.6438
646	argS	4Q2T_A	38731	599	333	11	1	577	21	607	1.7e-130	397	577	38.731	103.813
647	argS	4ZAJ_A	38731	599	333	11	1	577	2	588	2.12e-130	396	577	38.731	103.813
648	argS	NP_002878.2	38731	599	333	11	1	577	74	660	1.34e-129	396	577	38.731	103.813
649	argS	EAW61507.1	38731	599	333	11	1	577	74	660	1.59e-129	396	577	38.731	103.813
650	argS	4R3Z_B	38731	599	333	11	1	577	89	675	2.06e-129	396	577	38.731	103.813
651	argS	BAD96517.1	38731	599	333	11	1	577	74	660	2.85e-129	395	577	38.731	103.813
652	argS	BAG37326.1	38564	599	334	11	1	577	74	660	7.33e-129	394	577	38.564	103.813
653	argS	AAB35627.1	37458	598	341	11	1	577	74	659	1.49e-120	373	577	37.458	103.64
654	argS	BAG63528.1	38877	463	261	7	128	577	1	454	7.8e-100	313	577	38.877	80.2426
655	argS	NP_064716.2	29236	537	339	14	59	577	65	578	4.35e-55	198	577	29.236	93.0676
656	argS	BAB14608.1	29050	537	340	14	59	577	65	578	9.22e-55	197	577	29.05	93.0676
657	argS	AAH10420.1	29236	537	339	14	59	577	65	578	9.6e-55	197	577	29.236	93.0676
658	argS	NP_001337434.1	28972	535	339	14	59	575	65	576	9.12e-54	195	577	28.972	92.721
659	argS	XP_011534251.1	30425	424	262	11	59	467	65	470	2.33e-48	178	577	30.425	73.4835
660	argS	EAW48587.1	31879	298	176	9	59	341	65	350	3.29e-33	133	577	31.879	51.6464
661	argS	NP_001305714.1	26714	423	279	11	165	577	2	403	1.15e-29	124	577	26.714	73.3102
662	argS	NP_001337435.1	26366	421	279	11	165	575	2	401	1.01e-28	121	577	26.366	72.9636
663	argS	EAW48586.1	25217	460	277	14	165	577	2	441	3.21e-26	114	577	25.217	79.7227
664	argS	BAG57688.1	28713	101	52	4	74	160	93	187	0.98	35	577	28.713	17.5043
665	argS	BAD92716.1	28713	101	52	4	74	160	675	769	2.6	34.3	577	28.713	17.5043
666	argS	AQY77370.2	28713	101	52	4	74	160	123	217	2.7	34.3	577	28.713	17.5043
667	argS	NP_065175.4	28713	101	52	4	74	160	93	187	2.8	34.3	577	28.713	17.5043
668	argS	BAB67778.2	28713	101	52	4	74	160	93	187	2.8	34.3	577	28.713	17.5043
669	argS	EAX03348.1	28713	101	52	4	74	160	93	187	2.9	34.3	577	28.713	17.5043
670	argS	AQY77377.2	28713	101	52	4	74	160	123	217	2.9	34.3	577	28.713	17.5043
671	argS	BAG64468.1	28713	101	52	4	74	160	93	187	2.9	34.3	577	28.713	17.5043
672	argS	AQY77372.2	28713	101	52	4	74	160	123	217	2.9	34.3	577	28.713	17.5043
673	argS	AAI12055.1	28713	101	52	4	74	160	93	187	2.9	34.3	577	28.713	17.5043
674	argS	NP_001161206.1	28713	101	52	4	74	160	123	217	2.9	34.3	577	28.713	17.5043
675	argS	AQY77373.2	28713	101	52	4	74	160	123	217	2.9	34.3	577	28.713	17.5043
676	argS	BAG65557.1	28713	101	52	4	74	160	123	217	2.9	34.3	577	28.713	17.5043
677	argS	AAI43537.1	28713	101	52	4	74	160	93	187	3	34.3	577	28.713	17.5043
678	argS	AQY77371.2	28713	101	52	4	74	160	123	217	3	34.3	577	28.713	17.5043
679	argS	AQY77369.2	28713	101	52	4	74	160	123	217	3	34.3	577	28.713	17.5043
680	argS	EAX03349.1	28713	101	52	4	74	160	93	187	3.3	33.9	577	28.713	17.5043
681	argS	NP_001230075.1	27273	66	48	0	187	252	602	667	7.5	32.7	577	27.273	11.4385
682	argS	AAH12105.1	27273	66	48	0	187	252	594	659	9.3	32.3	577	27.273	11.4385
683	asd	XP_011539351.1	29268	82	47	5	45	122	9	83	5.7	32.3	367	29.268	22.3433
684	asd	NP_001284594.1	28205	78	49	4	45	122	12	82	6.1	32	367	28.205	21.2534
685	asd	NP_001073963.1	28205	78	49	4	45	122	12	82	6.3	32	367	28.205	21.2534
686	asd	AAH28374.1	28205	78	49	4	45	122	28	98	6.8	32	367	28.205	21.2534
687	asd	1KFX_S	24096	83	55	2	162	244	7	81	8.8	30.8	367	24.096	22.6158
688	asnS	AAH07800.2	42117	463	247	8	6	464	30	475	6.64e-125	374	466	42.117	99.3562
689	asnS	NP_078954.4	41901	463	248	8	6	464	30	475	2.96e-124	372	466	41.901	99.3562
690	asnS	BAG51837.1	42117	463	247	8	6	464	30	475	2.99e-124	372	466	42.117	99.3562
691	asnS	EAW75062.1	41469	463	242	8	6	464	30	467	3.63e-122	367	466	41.469	99.3562
692	asnS	XP_011543555.1	40821	463	244	8	6	464	30	466	7.45e-119	358	466	40.821	99.3562
693	asnS	NP_001230180.1	46748	246	127	3	222	464	4	248	8.08e-74	235	466	46.748	52.7897
694	asnS	BAB15655.1	46748	246	127	3	222	464	4	248	1.15e-73	234	466	46.748	52.7897
695	asnS	BAG37813.1	46341	246	128	3	222	464	4	248	2.97e-73	233	466	46.341	52.7897
696	asnS	XP_016873793.1	44715	246	123	3	222	464	4	239	1.65e-68	221	466	44.715	52.7897
697	asnS	XP_016873791.1	37762	286	160	6	4	287	28	297	6.12e-60	201	466	37.762	61.3734
698	asnS	5XIX_A	28132	455	271	12	20	459	52	465	1.93e-50	181	466	28.132	97.6395
699	asnS	BAD96555.1	28352	455	270	12	20	459	128	541	1.96e-50	182	466	28.352	97.6395
700	asnS	XP_005266757.1	28132	455	271	12	20	459	127	540	4.95e-50	181	466	28.132	97.6395
701	asnS	NP_004530.1	28132	455	271	12	20	459	128	541	5.75e-50	181	466	28.132	97.6395
702	asnS	BAG60122.1	30721	319	173	8	152	459	11	292	8.93e-44	158	466	30.721	68.4549
703	asnS	NP_001280241.1	29429	350	190	11	130	462	88	397	1.03e-31	128	466	29.429	75.1073
704	asnS	EAX11618.1	29429	350	190	11	130	462	155	464	2.01e-31	128	466	29.429	75.1073
705	asnS	AAI07750.1	29429	350	190	11	130	462	188	497	2.18e-31	129	466	29.429	75.1073
706	asnS	AAY15029.1	29226	349	190	11	131	462	1	309	2.19e-31	125	466	29.226	74.8927
707	asnS	AAX07827.1	29429	350	190	11	130	462	188	497	2.25e-31	129	466	29.429	75.1073
708	asnS	BAD96196.1	29429	350	190	11	130	462	188	497	2.25e-31	129	466	29.429	75.1073
709	asnS	NP_001340.2	29429	350	190	11	130	462	188	497	2.27e-31	129	466	29.429	75.1073
710	asnS	4J15_A	29429	350	190	11	130	462	208	517	2.88e-31	129	466	29.429	75.1073
711	asnS	AAA35567.1	29429	350	190	11	130	462	187	496	1.28e-30	126	466	29.429	75.1073
712	asnS	NP_001352141.1	23396	530	284	23	19	462	65	558	1.46e-11	69.7	466	23.396	113.734
713	asnS	4AH6_A	32716	162	85	7	315	462	419	570	7.7e-08	57.8	466	32.716	34.7639
714	asnS	4AH6_A	22264	265	169	11	19	272	26	264	0.01	41.6	466	22.264	56.867
715	asnS	BAB14228.1	32716	162	85	7	315	462	276	427	9.85e-08	57.4	466	32.716	34.7639
716	asnS	BAF83562.1	32716	162	85	7	315	462	458	609	9.89e-08	57.4	466	32.716	34.7639
717	asnS	BAF83562.1	22264	265	169	11	19	272	65	303	0.007	42	466	22.264	56.867
718	asnS	NP_060592.2	32716	162	85	7	315	462	458	609	1.03e-07	57.4	466	32.716	34.7639
719	asnS	NP_060592.2	22264	265	169	11	19	272	65	303	0.013	41.2	466	22.264	56.867
720	asnS	BAA91658.1	32716	162	85	7	315	462	276	427	1.38e-07	56.6	466	32.716	34.7639
721	asnS	BAB14197.1	41667	60	32	1	404	460	93	152	1.69e-05	48.5	466	41.667	12.8755
722	asnS	EAW90960.1	54054	37	17	0	426	462	536	572	0.000139	47.4	466	54.054	7.93991
723	asnS	EAW90960.1	22264	265	169	11	19	272	65	303	0.013	41.2	466	22.264	56.867
724	asnS	NP_001352142.1	22264	265	169	11	19	272	65	303	0.013	40.8	466	22.264	56.867
725	asnS	BAG57897.1	23288	146	104	4	20	161	128	269	0.49	35.8	466	23.288	31.3305
726	asnS	BAG57352.1	23288	146	104	4	20	161	95	236	0.54	35.4	466	23.288	31.3305
727	asnS	BAC86604.1	36364	33	21	0	426	458	365	397	0.6	35.8	466	36.364	7.08155
728	asnS	EAW95623.1	36364	33	21	0	426	458	525	557	1	35	466	36.364	7.08155
729	asnS	NP_001123561.1	36364	33	21	0	426	458	567	599	1.1	35	466	36.364	7.08155
730	asnS	AAG30114.1	36364	33	21	0	426	458	567	599	1.1	35	466	36.364	7.08155
731	asnS	BAA06688.2	36364	33	21	0	426	458	539	571	1.1	35	466	36.364	7.08155
732	asnS	NP_005539.1	36364	33	21	0	426	458	539	571	1.1	35	466	36.364	7.08155
733	asnS	XP_016878706.1	36364	33	21	0	426	458	383	415	1.2	34.7	466	36.364	7.08155
734	asnS	EAW95621.1	36364	33	21	0	426	458	576	608	1.2	35	466	36.364	7.08155
735	asnS	6ILH_A	36364	33	21	0	426	458	471	503	1.4	34.7	466	36.364	7.08155
736	asnS	4YCW_A	36364	33	21	0	426	458	471	503	1.5	34.7	466	36.364	7.08155
737	asnS	3BJU_A	36364	33	21	0	426	458	471	503	1.5	34.7	466	36.364	7.08155
738	asnS	4DPG_A	36364	33	21	0	426	458	471	503	1.5	34.7	466	36.364	7.08155
739	asnS	AFW97797.1	28235	85	49	3	152	231	21	98	3.8	31.2	466	28.235	18.2403
740	asnS	AKD41509.1	42424	33	19	0	186	218	59	91	3.8	31.6	466	42.424	7.08155
741	asnS	EAW93766.1	31461	89	52	5	357	442	130	212	3.9	32.7	466	31.461	19.0987
742	asnS	AKD41430.1	42424	33	19	0	186	218	59	91	6.1	31.2	466	42.424	7.08155
743	asnS	AKD41521.1	39474	38	21	1	186	221	59	96	6.6	31.2	466	39.474	8.15451
744	asnS	CCD30921.1	35897	39	23	1	186	222	59	97	6.8	30.8	466	35.897	8.3691
745	asnS	AKD41552.1	39474	38	21	1	186	221	59	96	7	30.8	466	39.474	8.15451
746	asnS	AKD41520.1	39474	38	21	1	186	221	59	96	7.1	30.8	466	39.474	8.15451
747	asnS	AKD41551.1	39474	38	21	1	186	221	59	96	7.2	30.8	466	39.474	8.15451
748	asnS	ANO55308.1	31343	67	42	1	172	234	7	73	8.1	29.6	466	31.343	14.3777
749	aspS	4AH6_A	40199	602	336	11	1	589	10	600	2.51e-145	436	590	40.199	102.034
750	aspS	NP_060592.2	40199	602	336	11	1	589	49	639	3.02e-145	436	590	40.199	102.034
751	aspS	BAF83562.1	40199	602	336	11	1	589	49	639	3.16e-145	436	590	40.199	102.034
752	aspS	NP_001352141.1	38870	602	295	12	1	590	49	589	1.79e-133	404	590	38.87	102.034
753	aspS	EAW90960.1	37313	603	317	11	1	590	49	603	5.86e-124	380	590	37.313	102.203
754	aspS	BAB14228.1	39355	465	265	7	134	589	1	457	6.31e-110	339	590	39.355	78.8136
755	aspS	BAA91658.1	39140	465	266	7	134	589	1	457	1.35e-108	336	590	39.14	78.8136
756	aspS	NP_001352142.1	40139	431	243	9	1	424	49	471	1.97e-93	297	590	40.139	73.0508
757	aspS	BAB14197.1	29524	210	101	3	387	589	15	184	1.78e-20	92.4	590	29.524	35.5932
758	aspS	4DPG_A	27572	243	159	9	26	261	67	299	3.74e-16	84.3	590	27.572	41.1864
759	aspS	4DPG_A	52778	36	17	0	520	555	468	503	0.000139	47.8	590	52.778	6.10169
760	aspS	3BJU_A	27572	243	159	9	26	261	67	299	4.35e-16	84.3	590	27.572	41.1864
761	aspS	3BJU_A	52778	36	17	0	520	555	468	503	0.000139	47.8	590	52.778	6.10169
762	aspS	BAA06688.2	27572	243	159	9	26	261	135	367	6.5e-16	84	590	27.572	41.1864
763	aspS	BAA06688.2	52778	36	17	0	520	555	536	571	0.000109	48.1	590	52.778	6.10169
764	aspS	NP_005539.1	27572	243	159	9	26	261	135	367	6.67e-16	84	590	27.572	41.1864
765	aspS	NP_005539.1	52778	36	17	0	520	555	536	571	0.00011	48.1	590	52.778	6.10169
766	aspS	AAG30114.1	27572	243	159	9	26	261	163	395	8.17e-16	84	590	27.572	41.1864
767	aspS	AAG30114.1	52778	36	17	0	520	555	564	599	0.000114	48.1	590	52.778	6.10169
768	aspS	NP_001123561.1	27572	243	159	9	26	261	163	395	9.82e-16	83.6	590	27.572	41.1864
769	aspS	NP_001123561.1	52778	36	17	0	520	555	564	599	0.000114	48.1	590	52.778	6.10169
770	aspS	EAW95621.1	27572	243	159	9	26	261	172	404	1.04e-15	83.6	590	27.572	41.1864
771	aspS	EAW95621.1	52778	36	17	0	520	555	573	608	0.000129	48.1	590	52.778	6.10169
772	aspS	6ILH_A	27572	243	159	9	26	261	67	299	1.16e-15	83.2	590	27.572	41.1864
773	aspS	6ILH_A	52778	36	17	0	520	555	468	503	0.000138	47.8	590	52.778	6.10169
774	aspS	4YCW_A	27160	243	160	9	26	261	67	299	1.85e-15	82.4	590	27.16	41.1864
775	aspS	4YCW_A	52778	36	17	0	520	555	468	503	0.000134	47.8	590	52.778	6.10169
776	aspS	XP_016878706.1	28409	176	120	5	90	261	38	211	8.91e-15	79.7	590	28.409	29.8305
[truncated: 13,088 more rows]
